# Supplementary material for: Altered Expression of Long Noncoding and Messenger RNAs in Diabetic Nephropathy following Treatment with Rosiglitazone
Source: Biomed Res Int. 2020 Jan 12;2020:1360843. doi: 10.1155/2020/1360843 (PMC6983290; doi:10.1155/2020/1360843)
Supplement: Supplementary Materials — Supplementary Table 1: significantly upregulated mRNAs in dbdb mice compared to the control group. Supplementary Table 2: significantly downregulated mRNAs in dbdb mice compared to the control group. Supplementary Table 3: significantly upregulated mRNAs in dbR mice compared to the dbdb group. Supplementary Table 4: significantly downregulated mRNAs in dbR mice compared to the dbdb group. Supplementary Table 5: mRNAs significantly upregulated by diabetic nephropathy yet reversed following rosiglitazone treatment. Supplementary Table 6: mRNAs significantly downregulated by diabetic nephropathy yet reversed following rosiglitazone treatment. Supplementary Table 7: significantly upregulated lncRNAs in dbdb mice compared to the control group. Supplementary Table 8: significantly downregulated lncRNAs in dbdb mice compared to the control group. Supplementary Table 9: significantly upregulated lncRNAs in dbR mice compared to the dbdb group. Supplementary Table 10: significantly downregulated lncRNAs in dbR mice compared to the dbdb group. Supplementary Table 11: lncRNAs significantly upregulated by diabetic nephropathy yet reversed following rosiglitazone treatment. Supplementary Table 12: lncRNAs significantly downregulated by diabetic nephropathy yet reversed following rosiglitazone treatment. Supplementary Table 13: differentially expressed lncRNAs colocated with genes. Supplementary Table 14: differentially expressed lncRNAs coexpressed with genes. Supplementary Table 15: top 20 significantly enriched GO terms associated with differentially expressed mRNAs in the kidneys of dbdb mice compared to the controls. Supplementary Table 16: top 20 significantly enriched GO terms associated with differentially expressed mRNAs in the kidneys of dbR mice compared to the dbdb group. Supplementary Table 17: top 20 significantly enriched GO terms associated with differentially expressed lncRNAs coexpressed with genes in the kidneys of dbdb mice compared to the controls. Supplementa [file 1360843.f1.zip]

Archive with 30 entries (30 files):
- 1360843.f1/Supplementary Table 1.xls
- 1360843.f1/Supplementary Table 10.xls
- 1360843.f1/Supplementary Table 11.xls
- 1360843.f1/Supplementary Table 12.xls
- 1360843.f1/Supplementary Table 13.xls
- 1360843.f1/Supplementary Table 14.xls
- 1360843.f1/Supplementary Table 15.xls
- 1360843.f1/Supplementary Table 16.xls
- 1360843.f1/Supplementary Table 17.xls
- 1360843.f1/Supplementary Table 18.xls
- 1360843.f1/Supplementary Table 19.xls
- 1360843.f1/Supplementary Table 2.xls
- 1360843.f1/Supplementary Table 20.xls
- 1360843.f1/Supplementary Table 21.xls
- 1360843.f1/Supplementary Table 22.xls
- 1360843.f1/Supplementary Table 23.xls
- 1360843.f1/Supplementary Table 24.xls
- 1360843.f1/Supplementary Table 25.xls
- 1360843.f1/Supplementary Table 26.xls
- 1360843.f1/Supplementary Table 27.xls
- 1360843.f1/Supplementary Table 28.xls
- 1360843.f1/Supplementary Table 29.xls
- 1360843.f1/Supplementary Table 3.xls
- 1360843.f1/Supplementary Table 30.xls
- 1360843.f1/Supplementary Table 4.xls
- 1360843.f1/Supplementary Table 5.xls
- 1360843.f1/Supplementary Table 6.xls
- 1360843.f1/Supplementary Table 7.xls
- 1360843.f1/Supplementary Table 8.xls
- 1360843.f1/Supplementary Table 9.xls
