# Supplementary material for: Altered Expression of Long Noncoding and Messenger RNAs in Diabetic Nephropathy following Treatment with Rosiglitazone
Source: Biomed Res Int. 2020 Jan 12;2020:1360843. doi: 10.1155/2020/1360843 (PMC6983290; doi:10.1155/2020/1360843)
Supplement: Supplementary Materials — Supplementary Table 1: significantly upregulated mRNAs in dbdb mice compared to the control group. Supplementary Table 2: significantly downregulated mRNAs in dbdb mice compared to the control group. Supplementary Table 3: significantly upregulated mRNAs in dbR mice compared to the dbdb group. Supplementary Table 4: significantly downregulated mRNAs in dbR mice compared to the dbdb group. Supplementary Table 5: mRNAs significantly upregulated by diabetic nephropathy yet reversed following rosiglitazone treatment. Supplementary Table 6: mRNAs significantly downregulated by diabetic nephropathy yet reversed following rosiglitazone treatment. Supplementary Table 7: significantly upregulated lncRNAs in dbdb mice compared to the control group. Supplementary Table 8: significantly downregulated lncRNAs in dbdb mice compared to the control group. Supplementary Table 9: significantly upregulated lncRNAs in dbR mice compared to the dbdb group. Supplementary Table 10: significantly downregulated lncRNAs in dbR mice compared to the dbdb group. Supplementary Table 11: lncRNAs significantly upregulated by diabetic nephropathy yet reversed following rosiglitazone treatment. Supplementary Table 12: lncRNAs significantly downregulated by diabetic nephropathy yet reversed following rosiglitazone treatment. Supplementary Table 13: differentially expressed lncRNAs colocated with genes. Supplementary Table 14: differentially expressed lncRNAs coexpressed with genes. Supplementary Table 15: top 20 significantly enriched GO terms associated with differentially expressed mRNAs in the kidneys of dbdb mice compared to the controls. Supplementary Table 16: top 20 significantly enriched GO terms associated with differentially expressed mRNAs in the kidneys of dbR mice compared to the dbdb group. Supplementary Table 17: top 20 significantly enriched GO terms associated with differentially expressed lncRNAs coexpressed with genes in the kidneys of dbdb mice compared to the controls. Supplementa [file 1360843.f1.zip › 1360843.f1/Supplementary Table 1.xls]

## Sheet: Table S1 mRNA_dbdb_vs_Control.D
Supplementary Table 1 Significantly up-regulated mRNAs in dbdb mice compared to the control group
transcript_id	gene_id	gene_name	gene_location	dbdb_FPKM	Control_FPKM	log2(foldchange)	pvalue	qvalue
ENSMUST00000090180	ENSMUSG00000021904	Sema3g	chr14:31217859-31230350	18.7793	13.9972	0.424003	0.0001	0.00265335
ENSMUST00000043961	ENSMUSG00000018800	Abca5	chr11:110269368-110337678	7.58337	5.60176	0.436958	0.0001	0.00265335
ENSMUST00000021653	ENSMUSG00000021228	Acot3	chr12:84038378-84059565	7.26509	3.24577	1.16242	0.00035	0.00785859
ENSMUST00000053106	ENSMUSG00000048218	Amigo2	chr15:97244073-97385689	4.08165	2.81936	0.533784	0.00125	0.0228388
ENSMUST00000020308	ENSMUSG00000020108	Ddit4	chr10:59949674-59951770	8.23465	4.31765	0.931459	5e-05	0.00141417
ENSMUST00000036928	ENSMUSG00000038776	Ephx1	chr1:180976209-181020904	24.0023	12.3063	0.96377	5e-05	0.00141417
ENSMUST00000031327	ENSMUSG00000029380	Cxcl1	chr5:90891240-90893115	2.1889	0.605678	1.85359	5e-05	0.00141417
ENSMUST00000191104	ENSMUSG00000055322	Tns1	chr1:73910230-74124449	223.531	138.905	0.686375	0.0001	0.00265335
ENSMUST00000051676	ENSMUSG00000046694	Fam46b	chr4:133480131-133487938	1.65614	0.601144	1.46204	5e-05	0.00141417
ENSMUST00000051672	ENSMUSG00000046718	Bst2	chr8:71534263-71537437	15.9751	7.98542	1.00038	5e-05	0.00141417
ENSMUST00000030142	ENSMUSG00000028434	Epb41l4b	chr4:56991971-57143437	4.49354	2.77567	0.695019	5e-05	0.00141417
ENSMUST00000144826	ENSMUSG00000023087	Noct	chr3:51224446-51251644	20.3387	12.0031	0.760822	5e-05	0.00141417
ENSMUST00000114430	ENSMUSG00000031391	L1cam	chrX:73853777-73880834	3.77349	2.17961	0.791829	5e-05	0.00141417
ENSMUST00000092486	ENSMUSG00000059901	Adamts14	chr10:61197111-61273438	0.968418	0.541289	0.839232	5e-05	0.00141417
ENSMUST00000117688	ENSMUSG00000029685	Asb15	chr6:24528143-24573164	0.994924	0.571529	0.799759	0.00055	0.0115424
ENSMUST00000163623	ENSMUSG00000021365	Nedd9	chr13:41309915-41487320	17.0669	11.5946	0.557745	5e-05	0.00141417
ENSMUST00000044003	ENSMUSG00000044749	Abca6	chr11:110176819-110251776	0.504621	0.296895	0.765247	0.0015	0.0264906
ENSMUST00000021413	ENSMUSG00000021025	Nfkbia	chr12:55489410-55492647	20.8662	14.8842	0.487392	0.0001	0.00265335
ENSMUST00000038769	ENSMUSG00000040808	S100g	chrX:162901237-163032508	1728.38	970.926	0.83199	5e-05	0.00141417
ENSMUST00000038760	ENSMUSG00000041782	Lad1	chr1:135818597-135833342	22.2242	14.6817	0.598108	5e-05	0.00141417
ENSMUST00000035222	ENSMUSG00000032602	Slc25a20	chr9:108662097-108684641	32.7187	25.036	0.386115	0.00055	0.0115424
ENSMUST00000003635	ENSMUSG00000003541	Ier3	chr17:35821683-35822923	41.1712	16.8911	1.28537	5e-05	0.00141417
ENSMUST00000029078	ENSMUSG00000027562	Car2	chr3:14886272-14900770	295.325	213.421	0.468605	5e-05	0.00141417
ENSMUST00000075671	ENSMUSG00000030722	Nfatc2ip	chr7:126382853-126396737	1.88465	1.30923	0.525575	0.0018	0.0306903
ENSMUST00000043077	ENSMUSG00000035686	Thrsp	chr7:97412937-97417730	4.04525	1.59819	1.33979	5e-05	0.00141417
ENSMUST00000139848	ENSMUSG00000034472	Rasd2	chr8:75213943-75224113	2.06586	0.655368	1.65636	5e-05	0.00141417
ENSMUST00000030303	ENSMUSG00000052914	Cyp2j6	chr4:96516137-96553661	15.2269	10.7033	0.508568	0.0001	0.00265335
ENSMUST00000030306	ENSMUSG00000028572	Hook1	chr4:95967239-96025413	33.297	26.0231	0.355597	0.00065	0.0133036
ENSMUST00000178136	ENSMUSG00000020865	Abcc3	chr11:94343294-94392976	0.676923	0.367552	0.881044	0.0007	0.0141397
ENSMUST00000047488	ENSMUSG00000038807	Rap1gap2	chr11:74383355-74590186	6.57815	3.60891	0.866117	5e-05	0.00141417
ENSMUST00000047157	ENSMUSG00000042308	Setd1a	chr7:127776669-127800122	6.03414	4.48207	0.428984	0.0024	0.0387964
ENSMUST00000093271	ENSMUSG00000031785	Adgrg1	chr8:94977108-95014208	20.3701	9.33862	1.12517	5e-05	0.00141417
ENSMUST00000033326	ENSMUSG00000031016	Wee1	chr7:110122349-110142112	13.1206	8.51836	0.623186	5e-05	0.00141417
ENSMUST00000118317	ENSMUSG00000008730	Hipk1	chr3:103739365-103791563	25.0415	19.3885	0.369121	0.00225	0.0368149
ENSMUST00000034722	ENSMUSG00000032202	Rab27a	chr9:73044853-73097629	6.09575	4.36992	0.480195	0.00075	0.0149651
ENSMUST00000027422	ENSMUSG00000026220	Slc16a14	chr1:84905897-84935134	60.5904	24.6838	1.29553	5e-05	0.00141417
ENSMUST00000103112	ENSMUSG00000035877	Zhx3	chr2:160731309-160906002	19.2387	13.652	0.494899	0.0017	0.0293704
ENSMUST00000036493	ENSMUSG00000033161	Atp1a1	chr3:101576218-101604684	1548.31	1061.63	0.544408	0.0012	0.0220581
ENSMUST00000045388	ENSMUSG00000039246	Lyplal1	chr1:186087730-186117310	40.8182	26.8689	0.603275	5e-05	0.00141417
ENSMUST00000057784	ENSMUSG00000031596	Slc7a2	chr8:40862395-40922308	2.07467	1.3488	0.621205	0.00145	0.0257185
ENSMUST00000033283	ENSMUSG00000030978	Rrm1	chr7:102441694-102469771	6.67775	5.07754	0.395232	0.0014	0.0250158
ENSMUST00000033289	ENSMUSG00000030987	Stim1	chr7:102267823-102436848	6.78496	3.37219	1.00866	5e-05	0.00141417
ENSMUST00000180252	ENSMUSG00000096847	Tmem151b	chr17:45523433-45549677	0.419502	0.173993	1.26964	5e-05	0.00141417
ENSMUST00000066994	ENSMUSG00000034522	Zfp395	chr14:65358675-65398930	4.5226	2.71052	0.738584	5e-05	0.00141417
ENSMUST00000062069	ENSMUSG00000047250	Ptgs1	chr2:36230425-36252272	7.99929	5.24007	0.610285	5e-05	0.00141417
ENSMUST00000090558	ENSMUSG00000068740	Celsr2	chr3:108390850-108415552	14.0367	10.0158	0.486921	5e-05	0.00141417
ENSMUST00000090559	ENSMUSG00000068742	Cry2	chr2:92403645-92434043	9.81726	5.22791	0.909087	5e-05	0.00141417
ENSMUST00000143829	ENSMUSG00000036087	Slain2	chr5:72914303-72978829	13.3073	7.22644	0.880861	5e-05	0.00141417
ENSMUST00000019708	ENSMUSG00000019564	Arid3a	chr10:79927042-79955018	2.36623	1.68264	0.491864	0.00065	0.0133036
ENSMUST00000065408	ENSMUSG00000079018	Ly6c1	chr15:75044017-75048830	56.075	39.3769	0.51001	0.0004	0.00878381
ENSMUST00000041874	ENSMUSG00000042684	Npl	chr1:153503014-153550045	63.6329	25.8141	1.30161	5e-05	0.00141417
ENSMUST00000002327	ENSMUSG00000002257	Def6	chr17:28207777-28228608	1.02901	0.610298	0.753678	0.00275	0.0432258
ENSMUST00000025826	ENSMUSG00000024891	Slc29a2	chr19:5024005-5031971	1.61512	1.03558	0.6412	0.0019	0.0321013
ENSMUST00000022881	ENSMUSG00000022270	Fam134b	chr15:25843263-25973687	102.821	65.2138	0.656889	5e-05	0.00141417
ENSMUST00000020958	ENSMUSG00000020627	Klhl29	chr12:5077471-5375682	0.420475	0.160477	1.38966	5e-05	0.00141417
ENSMUST00000038562	ENSMUSG00000039911	Spsb1	chr4:149896282-149955043	1.44941	0.670129	1.11296	5e-05	0.00141417
ENSMUST00000023752	ENSMUSG00000023013	Aqp2	chr15:99579055-99584545	88.5533	33.5748	1.39917	5e-05	0.00141417
ENSMUST00000023754	ENSMUSG00000043144	Aqp6	chr15:99601399-99605477	13.8367	4.81387	1.52323	5e-05	0.00141417
ENSMUST00000023759	ENSMUSG00000023018	Smarcd1	chr15:99702175-99713995	7.36929	5.31046	0.472688	0.00015	0.00378624
ENSMUST00000033741	ENSMUSG00000031375	Bgn	chrX:73483601-73495933	33.0833	24.6877	0.422313	0.00025	0.00588258
ENSMUST00000053020	ENSMUSG00000034413	Neurl1b	chr17:26414828-26446349	2.94706	2.22173	0.407591	0.0029	0.0449794
ENSMUST00000020227	ENSMUSG00000020038	Cry1	chr10:85131701-85185054	4.48468	0.871797	2.36294	5e-05	0.00141417
ENSMUST00000001534	ENSMUSG00000001494	Sost	chr11:101962457-101967015	0.556138	0.171961	1.69337	0.00015	0.00378624
ENSMUST00000100052	ENSMUSG00000033581	Igf2bp2	chr16:22059008-22163299	2.49738	1.69302	0.560814	0.00015	0.00378624
ENSMUST00000030280	ENSMUSG00000028553	Angptl3	chr4:98936670-99120915	6.34782	2.71378	1.22596	0.0023	0.0374907
ENSMUST00000031243	ENSMUSG00000029304	Spp1	chr5:104435117-104441050	1045.62	361.297	1.5331	5e-05	0.00141417
ENSMUST00000055294	ENSMUSG00000050069	Grem2	chr1:174833784-174921819	1.80353	0.457391	1.97932	5e-05	0.00141417
ENSMUST00000107088	ENSMUSG00000030737	Slco2b1	chr7:99657803-99711340	3.87698	2.12265	0.869067	5e-05	0.00141417
ENSMUST00000107084	ENSMUSG00000030732	Chrdl2	chr7:100006403-100034728	0.765638	0.152978	2.32334	5e-05	0.00141417
ENSMUST00000059997	ENSMUSG00000045838	A430105I19Rik	chr2:118754157-118762661	1.74103	0.851623	1.03165	5e-05	0.00141417
ENSMUST00000092566	ENSMUSG00000019838	Slc16a10	chr10:40033534-40142254	18.4872	14.1046	0.390364	0.0005	0.0106375
ENSMUST00000064257	ENSMUSG00000052415	Tchh	chr3:93442329-93449077	5.6823	4.0445	0.490513	5e-05	0.00141417
ENSMUST00000098513	ENSMUSG00000074170	Plekhf1	chr7:38216971-38228016	4.13044	3.01201	0.455571	0.0004	0.00878381
ENSMUST00000056153	ENSMUSG00000044788	Fads6	chr11:115279621-115297514	4.47753	2.76632	0.694736	5e-05	0.00141417
ENSMUST00000114276	ENSMUSG00000032320	Rcn2	chr9:56041856-56059077	19.1815	13.2383	0.534997	5e-05	0.00141417
ENSMUST00000205228	ENSMUSG00000063415	Cyp26b1	chr6:84571413-84593908	1.82058	0.304079	2.58188	5e-05	0.00141417
ENSMUST00000021512	ENSMUSG00000021094	Dhrs7	chr12:72650355-72666691	17.4878	8.98547	0.960683	5e-05	0.00141417
ENSMUST00000091851	ENSMUSG00000024558	Mapk4	chr18:73928485-74064929	17.8713	13.3492	0.420888	0.00015	0.00378624
ENSMUST00000029865	ENSMUSG00000028211	Trp53inp1	chr4:11156430-11174379	17.9182	12.092	0.56738	5e-05	0.00141417
ENSMUST00000129564	ENSMUSG00000042404	Dennd4b	chr3:90265184-90280669	1.59993	0.927907	0.785959	0.0004	0.00878381
ENSMUST00000045303	ENSMUSG00000040447	Spns2	chr11:72441354-72489904	21.1933	11.1824	0.922376	5e-05	0.00141417
ENSMUST00000051704	ENSMUSG00000029516	Cit	chr5:115845279-116008947	2.28717	1.62331	0.494623	0.00075	0.0149651
ENSMUST00000051705	ENSMUSG00000039639	Kcne1	chr16:92346000-92359468	5.67075	2.38119	1.25186	5e-05	0.00141417
ENSMUST00000127305	ENSMUSG00000010080	Epn3	chr11:94489598-94499974	5.75148	2.91452	0.980674	5e-05	0.00141417
ENSMUST00000127306	ENSMUSG00000028445	Enho	chr4:41569774-41640324	1.20489	0.646152	0.898955	0.00325	0.0493611
ENSMUST00000150285	ENSMUSG00000028521	Slc35d1	chr4:103170648-103215164	14.0796	9.32065	0.595104	0.00015	0.00378624
ENSMUST00000084621	ENSMUSG00000039813	Tbc1d2	chr4:46604389-46650209	1.35578	0.78269	0.792606	5e-05	0.00141417
ENSMUST00000027629	ENSMUSG00000026380	Tfcp2l1	chr1:118627945-118685168	81.1464	45.976	0.819646	5e-05	0.00141417
ENSMUST00000045847	ENSMUSG00000040857	Erf	chr7:25242560-25250761	17.058	12.3039	0.47134	0.0001	0.00265335
ENSMUST00000039164	ENSMUSG00000036832	Lpar3	chr3:146220962-146286186	17.2606	11.2036	0.623521	5e-05	0.00141417
ENSMUST00000109912	ENSMUSG00000031618	Nr3c2	chr8:76899441-77245012	4.66515	3.38554	0.462536	0.00265	0.0420006
ENSMUST00000028223	ENSMUSG00000026866	Kynu	chr2:43555328-43682715	17.251	3.76832	2.19469	5e-05	0.00141417
ENSMUST00000102825	ENSMUSG00000074896	Ifit3	chr19:34583530-34588731	11.8742	8.56314	0.47162	0.0009	0.0174274
ENSMUST00000102823	ENSMUSG00000038172	Ttc39b	chr4:83220299-83324255	3.00327	2.26134	0.409357	0.00175	0.0300127
ENSMUST00000033941	ENSMUSG00000031538	Plat	chr8:22757743-22782847	16.7262	10.9734	0.608107	5e-05	0.00141417
ENSMUST00000066912	ENSMUSG00000054072	Iigp1	chr18:60376028-60392627	18.1292	5.36041	1.7579	5e-05	0.00141417
ENSMUST00000113355	ENSMUSG00000030064	Frmd4b	chr6:97286866-97617541	12.0965	6.70181	0.851965	0.0008	0.0157593
ENSMUST00000141118	ENSMUSG00000032786	Alas1	chr9:106233454-106248126	44.5132	29	0.618179	0.0008	0.0157593
ENSMUST00000105987	ENSMUSG00000028909	Ptpru	chr4:131768456-131838288	3.56957	2.44103	0.548263	5e-05	0.00141417
ENSMUST00000017458	ENSMUSG00000017314	Mpp2	chr11:102057014-102088515	0.927573	0.497744	0.898057	5e-05	0.00141417
ENSMUST00000115351	ENSMUSG00000019066	Rab3d	chr9:21907490-21918192	1.2872	0.810729	0.66694	0.0004	0.00878381
ENSMUST00000115358	ENSMUSG00000017978	Cadps2	chr6:23262772-23839421	2.30911	0.912833	1.33891	0.0008	0.0157593
ENSMUST00000016323	ENSMUSG00000016179	Camk1g	chr1:193346345-193370298	2.06851	1.00381	1.04311	5e-05	0.00141417
ENSMUST00000040166	ENSMUSG00000038578	Susd1	chr4:59314682-59438633	2.92217	1.19294	1.29251	5e-05	0.00141417
ENSMUST00000154256	ENSMUSG00000085795	Zfp703	chr8:26977335-26981461	3.86373	2.74923	0.490968	0.0009	0.0174274
ENSMUST00000042617	ENSMUSG00000033770	Clcnka	chr4:141384609-141398724	4.53765	2.0051	1.17827	0.00325	0.0493611
ENSMUST00000047399	ENSMUSG00000041293	Adgrf1	chr17:43270328-43324737	0.966315	0.518486	0.898188	5e-05	0.00141417
ENSMUST00000110457	ENSMUSG00000022272	Myo10	chr15:25622524-25813673	23.4443	17.616	0.412346	0.00045	0.009687
ENSMUST00000047028	ENSMUSG00000042363	Lgalsl	chr11:20823575-20831056	6.91574	4.43209	0.641895	5e-05	0.00141417
ENSMUST00000159068	ENSMUSG00000045875	Adra1a	chr14:66635250-66733462	1.45814	0.458235	1.66996	0.00145	0.0257185
ENSMUST00000023203	ENSMUSG00000022546	Gpt	chr15:76696763-76699674	17.3602	8.03823	1.11084	5e-05	0.00141417
ENSMUST00000163694	ENSMUSG00000032294	Pkm	chr9:59656367-59679375	10.373	5.05425	1.03726	0.0023	0.0374907
ENSMUST00000035121	ENSMUSG00000032531	Amotl2	chr9:102716671-102733418	26.2066	18.4329	0.507648	5e-05	0.00141417
ENSMUST00000054472	ENSMUSG00000025418	Bsnd	chr4:106483455-106492283	12.3371	9.34017	0.401482	0.0011	0.020454
ENSMUST00000003318	ENSMUSG00000003233	Dvl3	chr16:20511132-20532520	11.5009	8.20738	0.486758	0.00015	0.00378624
ENSMUST00000182858	ENSMUSG00000098132	Rassf10	chr7:112953961-112957457	0.530626	0.277942	0.932911	0.00095	0.0182319
ENSMUST00000102678	ENSMUSG00000067212	H2-T23	chr17:36029975-36032855	43.3626	26.9799	0.684567	5e-05	0.00141417
ENSMUST00000027997	ENSMUSG00000026678	Rgs5	chr1:169655500-169695813	13.5098	10.0612	0.425203	0.0004	0.00878381
ENSMUST00000070313	ENSMUSG00000039410	Prdm16	chr4:154316124-154636873	1.23403	0.523187	1.23797	0.00065	0.0133036
ENSMUST00000067384	ENSMUSG00000054364	Rhob	chr12:8497762-8499985	24.9687	16.9087	0.562354	5e-05	0.00141417
ENSMUST00000042021	ENSMUSG00000038984	Tspyl5	chr15:33683875-33687883	1.86043	1.26702	0.554196	0.0007	0.0141397
ENSMUST00000018572	ENSMUSG00000018428	Akap1	chr11:88830791-88881395	18.483	13.785	0.423102	0.0012	0.0220581
ENSMUST00000048121	ENSMUSG00000041794	Myrip	chr9:120303935-120474841	0.811886	0.452418	0.843621	5e-05	0.00141417
ENSMUST00000044895	ENSMUSG00000039601	Rcan2	chr17:43801850-44039516	4.56203	2.6636	0.776296	5e-05	0.00141417
ENSMUST00000050149	ENSMUSG00000038244	Mical2	chr7:112225855-112355194	1.9231	1.3442	0.51669	0.00215	0.0355551
ENSMUST00000041065	ENSMUSG00000035441	Myo1d	chr11:80482125-80780025	14.461	9.20967	0.650941	5e-05	0.00141417
ENSMUST00000004985	ENSMUSG00000063952	Brpf3	chr17:28801089-28838546	9.77951	7.47433	0.387819	0.00035	0.00785859
ENSMUST00000049658	ENSMUSG00000024851	Pitpnm1	chr19:4099997-4113965	2.59075	1.53865	0.751706	5e-05	0.00141417
ENSMUST00000047721	ENSMUSG00000041506	Rrp9	chr9:106477268-106485424	5.68828	3.74382	0.603483	0.0004	0.00878381
ENSMUST00000127638	ENSMUSG00000004040	Stat3	chr11:100859350-100939540	19.2544	11.0409	0.80233	5e-05	0.00141417
ENSMUST00000030724	ENSMUSG00000028893	Sesn2	chr4:132492031-132510501	12.6182	7.8322	0.688019	5e-05	0.00141417
ENSMUST00000007980	ENSMUSG00000007836	Hnrnpa0	chr13:58125878-58128556	34.7206	26.0329	0.415455	0.0002	0.00485099
ENSMUST00000046233	ENSMUSG00000041660	Bbox1	chr2:110262696-110404935	2.38661	1.24107	0.943372	0.00025	0.00588258
ENSMUST00000074557	ENSMUSG00000060586	H2-Eb1	chr17:34305876-34316199	57.1307	28.528	1.00189	5e-05	0.00141417
ENSMUST00000037811	ENSMUSG00000020609	Apob	chr12:7977647-8016835	143.78	67.5572	1.08968	5e-05	0.00141417
ENSMUST00000076840	ENSMUSG00000048915	Efna5	chr17:62604183-62881317	1.42093	0.969641	0.551318	0.00315	0.0481278
ENSMUST00000058178	ENSMUSG00000051397	Tacstd2	chr6:67534061-67535796	12.4283	6.3338	0.972485	5e-05	0.00141417
ENSMUST00000020145	ENSMUSG00000019970	Sgk1	chr10:21882183-21999903	202.328	29.5111	2.77736	5e-05	0.00141417
ENSMUST00000036854	ENSMUSG00000040659	Efhd2	chr4:141858141-141874920	9.87264	7.19634	0.456174	0.00035	0.00785859
ENSMUST00000052126	ENSMUSG00000043681	Fam25c	chr14:34351880-34355433	20.9031	9.98095	1.06647	5e-05	0.00141417
ENSMUST00000174042	ENSMUSG00000020875	Hoxb9	chr11:96271456-96276595	1.43585	0.391984	1.87304	0.00115	0.0213015
ENSMUST00000034285	ENSMUSG00000031827	Cotl1	chr8:119809224-119840579	95.4279	58.1902	0.713634	5e-05	0.00141417
ENSMUST00000010239	ENSMUSG00000010095	Slc3a2	chr19:8706881-8723369	122.101	77.8669	0.648994	5e-05	0.00141417
ENSMUST00000116402	ENSMUSG00000021255	Esrrb	chr12:86361116-86521628	3.10832	1.63016	0.931119	0.0004	0.00878381
ENSMUST00000019833	ENSMUSG00000019689	1110001J03Rik	chr6:38534822-38539449	116.744	90.2358	0.371572	0.0021	0.034862
ENSMUST00000022971	ENSMUSG00000022346	Myc	chr15:61985340-61990374	2.82445	1.25484	1.17046	5e-05	0.00141417
ENSMUST00000166232	ENSMUSG00000031955	Bcar1	chr8:111710484-111743849	25.9771	20.1616	0.365632	0.00085	0.0165966
ENSMUST00000035987	ENSMUSG00000042724	Map3k9	chr12:81714949-81781170	2.08973	1.29849	0.686479	5e-05	0.00141417
ENSMUST00000024906	ENSMUSG00000024098	Twsg1	chr17:65923065-65951187	16.5478	11.1512	0.569443	5e-05	0.00141417
ENSMUST00000144548	ENSMUSG00000059149	Mfsd4	chr1:131962953-132067965	7.69557	3.18331	1.2735	0.002	0.0334664
ENSMUST00000034325	ENSMUSG00000031861	Lpar2	chr8:69822428-69831102	1.86981	1.02367	0.869143	0.0011	0.020454
ENSMUST00000037678	ENSMUSG00000034371	Tkfc	chr19:10592199-10604258	144.763	106.91	0.437297	5e-05	0.00141417
ENSMUST00000041616	ENSMUSG00000032788	Pdxk	chr10:78436743-78464975	56.3593	27.6842	1.02559	5e-05	0.00141417
ENSMUST00000110103	ENSMUSG00000038508	Gdf15	chr8:70629392-70632456	2.61194	1.19531	1.12774	5e-05	0.00141417
ENSMUST00000002989	ENSMUSG00000002910	Arrdc2	chr8:70835154-70839720	3.10453	1.47816	1.07057	5e-05	0.00141417
ENSMUST00000005692	ENSMUSG00000005553	Atp4a	chr7:30712208-30725535	10.8623	4.19512	1.37254	5e-05	0.00141417
ENSMUST00000039048	ENSMUSG00000035372	1810055G02Rik	chr19:3708332-3717881	3.12612	2.07654	0.590194	0.00145	0.0257185
ENSMUST00000035218	ENSMUSG00000032598	Nckipsd	chr9:108808367-108818844	3.60966	2.59806	0.474428	0.00105	0.019753
ENSMUST00000063318	ENSMUSG00000020102	Slc16a7	chr10:125226463-125328963	25.1631	17.3109	0.539627	0.0003	0.00690244
ENSMUST00000003397	ENSMUSG00000003309	Ap1m2	chr9:21295456-21312333	6.19266	3.47589	0.833179	5e-05	0.00141417
ENSMUST00000031273	ENSMUSG00000029330	Cds1	chr5:101765129-101823858	11.0124	7.78159	0.500995	5e-05	0.00141417
ENSMUST00000033828	ENSMUSG00000031451	Gas6	chr8:13465373-13494535	114.697	87.1944	0.395518	0.00025	0.00588258
ENSMUST00000043042	ENSMUSG00000041143	Tmco4	chr4:138972887-139059171	3.66957	1.75076	1.06763	5e-05	0.00141417
ENSMUST00000022831	ENSMUSG00000047153	Khnyn	chr14:55884968-55896781	6.42843	4.93852	0.380387	0.00325	0.0493611
ENSMUST00000033173	ENSMUSG00000030880	Polr3e	chr7:120917743-120947432	27.7864	14.6348	0.924978	5e-05	0.00141417
ENSMUST00000053716	ENSMUSG00000050866	Clrn3	chr7:135511465-135528654	25.3914	20.1901	0.330695	0.00285	0.0444141
ENSMUST00000118169	ENSMUSG00000030781	Slc5a2	chr7:128265675-128298170	216.159	153.435	0.494465	0.0006	0.0124324
ENSMUST00000140607	ENSMUSG00000029192	Tbc1d14	chr5:36490603-36696024	11.7758	4.09819	1.52276	0.00205	0.0341843
ENSMUST00000034512	ENSMUSG00000032014	Oaf	chr9:43221277-43239816	11.6292	8.53706	0.445938	0.00035	0.00785859
ENSMUST00000034510	ENSMUSG00000032012	Pvrl1	chr9:43738868-43807454	20.9041	9.56716	1.12762	5e-05	0.00141417
ENSMUST00000096554	ENSMUSG00000071847	Apcdd1	chr18:62922326-62953195	0.958109	0.367306	1.38321	5e-05	0.00141417
ENSMUST00000019469	ENSMUSG00000078650	G6pc	chr11:101367560-101377903	432.894	162.779	1.4111	5e-05	0.00141417
ENSMUST00000081541	ENSMUSG00000060317	Acnat2	chr4:49379839-49408151	124.382	42.3472	1.55444	5e-05	0.00141417
ENSMUST00000198435	ENSMUSG00000029254	Stap1	chr5:86071745-86106125	1.04887	0.624501	0.748055	0.00205	0.0341843
ENSMUST00000041965	ENSMUSG00000021279	Cdc42bpb	chr12:111292971-111377718	21.6254	17.2268	0.328071	0.00255	0.0407945
ENSMUST00000076349	ENSMUSG00000001986	Gria3	chrX:41401127-41678601	2.94539	1.90277	0.630354	0.00045	0.009687
ENSMUST00000030784	ENSMUSG00000028944	Prkag2	chr5:24862743-25100642	16.4363	11.9266	0.462701	0.00015	0.00378624
ENSMUST00000182959	ENSMUSG00000032826	Ank2	chr3:126921611-127499350	0.797452	0.359222	1.15052	0.00155	0.0272269
ENSMUST00000133342	ENSMUSG00000002578	Ikzf4	chr10:128630842-128645991	0.677408	0.426707	0.666779	0.00185	0.031399
ENSMUST00000129099	ENSMUSG00000005107	Slc2a9	chr5:38349272-38503143	4.52208	1.60083	1.49817	5e-05	0.00141417
ENSMUST00000170111	ENSMUSG00000021752	Kctd6	chr14:8214147-8223567	1.60497	0.76144	1.07574	0.0009	0.0174274
ENSMUST00000042125	ENSMUSG00000033257	Ttll4	chr1:74661744-74703730	7.9473	5.79464	0.455746	0.0002	0.00485099
ENSMUST00000099309	ENSMUSG00000074768	Bhmt	chr13:93616890-93637961	34.9914	2.97272	3.55714	5e-05	0.00141417
ENSMUST00000045224	ENSMUSG00000038007	Acer2	chr4:86874395-86920875	5.40934	3.89061	0.475458	0.0004	0.00878381
ENSMUST00000198988	ENSMUSG00000050074	Spink8	chr9:109812279-109826633	13.0675	6.92967	0.915122	5e-05	0.00141417
ENSMUST00000095328	ENSMUSG00000079057	Cyp4v3	chr8:45304945-45333216	1.913	1.29424	0.563734	0.0013	0.0235944
ENSMUST00000093772	ENSMUSG00000013419	Zfp651	chr9:121760032-121771742	2.5103	1.63044	0.622603	5e-05	0.00141417
ENSMUST00000090746	ENSMUSG00000027875	Hmgcs2	chr3:98280434-98310738	39.3958	2.34239	4.07199	5e-05	0.00141417
ENSMUST00000165978	ENSMUSG00000021275	Tecpr2	chr12:110889263-110972394	2.21818	1.55538	0.512108	0.0011	0.020454
ENSMUST00000024988	ENSMUSG00000024164	C3	chr17:57203969-57228136	22.7388	5.11001	2.15376	5e-05	0.00141417
ENSMUST00000140770	ENSMUSG00000066438	Plekhd1	chr12:80692590-80724214	1.75328	0.991229	0.822767	5e-05	0.00141417
ENSMUST00000022587	ENSMUSG00000022010	Tsc22d1	chr14:76414960-76507765	249.467	104.216	1.25927	5e-05	0.00141417
ENSMUST00000022580	ENSMUSG00000022003	Slc25a30	chr14:75761998-75787037	33.5936	23.202	0.533937	5e-05	0.00141417
ENSMUST00000022589	ENSMUSG00000022012	Enox1	chr14:77156762-77721760	0.672588	0.271931	1.30648	5e-05	0.00141417
ENSMUST00000054098	ENSMUSG00000044026	Slc35g1	chr19:38395979-38405607	6.92704	4.1525	0.738261	5e-05	0.00141417
ENSMUST00000085635	ENSMUSG00000066595	Mfsd7b	chr1:191005846-191029781	6.09424	2.21565	1.45972	5e-05	0.00141417
ENSMUST00000094464	ENSMUSG00000028977	Casz1	chr4:148804428-148954889	0.802762	0.278524	1.52717	0.0023	0.0374907
ENSMUST00000044338	ENSMUSG00000036882	Arhgap33	chr7:30522225-30534180	0.414683	0.175525	1.24033	5e-05	0.00141417
ENSMUST00000019283	ENSMUSG00000019139	Isyna1	chr8:70594480-70597288	13.3596	7.29945	0.872018	5e-05	0.00141417
ENSMUST00000000199	ENSMUSG00000062661	Ncs1	chr2:31245822-31295989	3.16663	1.84767	0.777239	5e-05	0.00141417
ENSMUST00000040423	ENSMUSG00000032679	Cd59a	chr2:104095800-104115354	20.7808	14.7781	0.491791	0.0001	0.00265335
ENSMUST00000004470	ENSMUSG00000004356	Utp20	chr10:88746606-88826814	20.7677	13.4018	0.631912	5e-05	0.00141417
ENSMUST00000165311	ENSMUSG00000025189	Cnnm1	chr19:43440435-43497212	2.83017	2.04864	0.466219	0.00135	0.0242813
ENSMUST00000106576	ENSMUSG00000033721	Vav3	chr3:109340652-109685698	5.09374	2.91577	0.804846	5e-05	0.00141417
ENSMUST00000059193	ENSMUSG00000048376	F2r	chr13:95601803-95618459	20.521	14.9417	0.457761	0.0001	0.00265335
ENSMUST00000062405	ENSMUSG00000049892	Rasd1	chr11:59963180-59964944	2.74708	0.984174	1.48091	5e-05	0.00141417
ENSMUST00000024866	ENSMUSG00000024066	Xdh	chr17:73883907-73950182	16.4819	8.04118	1.03541	5e-05	0.00141417
ENSMUST00000030677	ENSMUSG00000028862	Map3k6	chr4:133240817-133252929	1.14706	0.402136	1.51219	5e-05	0.00141417
ENSMUST00000085774	ENSMUSG00000039683	Sdk1	chr5:141241489-142215586	0.454705	0.156096	1.54249	5e-05	0.00141417
ENSMUST00000028838	ENSMUSG00000027360	Hdc	chr2:126593666-126618678	1.6646	0.886852	0.908409	0.0001	0.00265335
ENSMUST00000045142	ENSMUSG00000038816	Ctnnal1	chr4:56810934-56865188	8.43181	6.21266	0.440633	0.00015	0.00378624
ENSMUST00000027472	ENSMUSG00000026255	Efhd1	chr1:87264362-87310839	32.8091	16.726	0.972004	5e-05	0.00141417
ENSMUST00000031646	ENSMUSG00000029641	Rasl11a	chr5:146845070-146847726	3.94757	1.89441	1.05922	5e-05	0.00141417
ENSMUST00000033036	ENSMUSG00000030772	Dkk3	chr7:112116018-112159057	6.77909	4.01705	0.754954	5e-05	0.00141417
ENSMUST00000032341	ENSMUSG00000030217	Art4	chr6:136848450-136857733	0.639166	0.347631	0.878636	0.0026	0.0414406
ENSMUST00000039990	ENSMUSG00000038168	P3h2	chr16:25956474-26105784	61.4207	42.9515	0.516016	5e-05	0.00141417
ENSMUST00000115516	ENSMUSG00000062012	Zfp13	chr17:23575844-23599487	1.11786	0.585593	0.932767	0.0013	0.0235944
ENSMUST00000053577	ENSMUSG00000045394	Epcam	chr17:87635978-87651106	16.6954	10.5997	0.655428	5e-05	0.00141417
ENSMUST00000029440	ENSMUSG00000027848	Olfml3	chr3:103731664-103738001	2.45436	1.71819	0.51446	0.0004	0.00878381
ENSMUST00000094836	ENSMUSG00000029123	Stk32b	chr5:37446824-37717171	3.64641	2.07164	0.815706	5e-05	0.00141417
ENSMUST00000046687	ENSMUSG00000038156	Spon1	chr7:113765997-114043370	2.65325	1.06508	1.3168	5e-05	0.00141417
ENSMUST00000050487	ENSMUSG00000024610	Cd74	chr18:60803847-60812646	290.683	116.42	1.3201	5e-05	0.00141417
ENSMUST00000043414	ENSMUSG00000036661	Dennd3	chr15:73512559-73572242	8.00652	6.11503	0.388814	0.0009	0.0174274
ENSMUST00000003964	ENSMUSG00000003865	Gys1	chr7:45420819-45456619	13.189	7.7587	0.765451	5e-05	0.00141417
ENSMUST00000165602	ENSMUSG00000026463	Atp2b4	chr1:133699456-133801041	5.54288	2.31978	1.25665	5e-05	0.00141417
ENSMUST00000027677	ENSMUSG00000026421	Csrp1	chr1:135720060-135752232	14.9422	9.96758	0.584073	5e-05	0.00141417
ENSMUST00000032185	ENSMUSG00000030096	Slc6a6	chr6:91684052-91759066	96.1545	73.2524	0.392479	0.00065	0.0133036
ENSMUST00000046893	ENSMUSG00000038390	Gpr162	chr6:124858443-124863983	0.994012	0.602053	0.723372	0.00255	0.0407945
ENSMUST00000038377	ENSMUSG00000036478	Btg1	chr10:96617000-96622813	14.7708	11.1341	0.407758	0.00025	0.00588258
ENSMUST00000026262	ENSMUSG00000025232	Hexa	chr9:59539666-59565105	19.5507	13.6869	0.514425	0.00015	0.00378624
ENSMUST00000113838	ENSMUSG00000031209	Heph	chrX:96306177-96574485	4.07386	2.41612	0.753706	5e-05	0.00141417
ENSMUST00000070150	ENSMUSG00000045071	E130308A19Rik	chr4:59626210-59761439	1.78914	1.27997	0.483155	0.0022	0.0361992
ENSMUST00000113307	ENSMUSG00000026819	Slc25a25	chr2:32414486-32456953	40.6711	12.6272	1.68747	5e-05	0.00141417
ENSMUST00000039812	ENSMUSG00000040123	Zmym5	chr14:56790584-56811716	6.72513	3.19238	1.07493	5e-05	0.00141417
ENSMUST00000090500	ENSMUSG00000022519	Srl	chr16:4480215-4523075	1.78756	0.996794	0.842627	5e-05	0.00141417
ENSMUST00000112826	ENSMUSG00000026866	Kynu	chr2:43555328-43682715	7.09797	1.21465	2.54687	0.0003	0.00690244
ENSMUST00000047922	ENSMUSG00000034919	Ttc22	chr4:106622431-106640189	2.08558	1.01785	1.03493	5e-05	0.00141417
ENSMUST00000049149	ENSMUSG00000040249	Lrp1	chr10:127538160-127621148	7.56112	5.56346	0.442618	0.0001	0.00265335
ENSMUST00000023259	ENSMUSG00000022594	Lynx1	chr15:74747851-74753046	2.27811	1.51767	0.585975	0.00015	0.00378624
ENSMUST00000082125	ENSMUSG00000009772	Nuak2	chr1:132316125-132333488	70.4843	30.4212	1.21223	5e-05	0.00141417
ENSMUST00000066279	ENSMUSG00000036206	Sh3bp4	chr1:89070414-89155068	4.53815	3.03264	0.58153	5e-05	0.00141417
ENSMUST00000165839	ENSMUSG00000032114	Slc37a4	chr9:44398175-44402963	203.769	154.038	0.403651	0.0007	0.0141397
ENSMUST00000130411	ENSMUSG00000016921	Srsf6	chr2:162931527-162937121	30.8634	24.6708	0.323092	0.00295	0.0455823
ENSMUST00000029670	ENSMUSG00000028036	Ptgfr	chr3:151796501-151837630	6.9526	4.58699	0.600006	5e-05	0.00141417
ENSMUST00000029673	ENSMUSG00000028039	Efna3	chr3:89313898-89322965	0.597856	0.143696	2.05678	0.0001	0.00265335
ENSMUST00000031490	ENSMUSG00000029512	Ulk1	chr5:110784487-110810097	15.5147	11.7118	0.405665	0.0002	0.00485099
ENSMUST00000034049	ENSMUSG00000031633	Slc25a4	chr8:46206796-46211284	228.815	176.265	0.376433	0.00065	0.0133036
ENSMUST00000034046	ENSMUSG00000018796	Acsl1	chr8:46471040-46536051	39.9379	28.7717	0.473108	0.00035	0.00785859
ENSMUST00000102605	ENSMUSG00000020893	Per1	chr11:69095216-69109960	1.48947	0.319549	2.22069	0.0014	0.0250158
ENSMUST00000061244	ENSMUSG00000029710	Ephb4	chr5:137350108-137374532	13.4681	10.0575	0.421267	0.0008	0.0157593
ENSMUST00000115694	ENSMUSG00000024485	Slc4a9	chr18:36528156-36541293	7.69473	3.62717	1.08503	5e-05	0.00141417
ENSMUST00000032856	ENSMUSG00000030621	Me3	chr7:89632096-89854359	5.20021	3.4718	0.582886	0.0001	0.00265335
ENSMUST00000000543	ENSMUSG00000000531	Grasp	chr15:101224206-101232755	2.76598	1.70437	0.69855	0.00025	0.00588258
ENSMUST00000000544	ENSMUSG00000000532	Acvr1b	chr15:101174066-101213679	11.849	8.03731	0.559979	5e-05	0.00141417
ENSMUST00000150819	ENSMUSG00000034382	AI661453	chr17:47412733-47470638	3.89895	2.12019	0.87889	5e-05	0.00141417
ENSMUST00000044844	ENSMUSG00000034854	Mfsd12	chr10:81357490-81378516	4.34489	2.84666	0.610051	0.0017	0.0293704
ENSMUST00000084882	ENSMUSG00000006356	Crip2	chr12:113140235-113145506	11.4652	7.94783	0.528628	0.00055	0.0115424
ENSMUST00000167320	ENSMUSG00000056724	Nbeal2	chr9:110624788-110654161	6.70196	4.42859	0.597736	5e-05	0.00141417
ENSMUST00000005066	ENSMUSG00000004936	Map2k1	chr9:64185769-64253631	21.9982	15.8726	0.470848	5e-05	0.00141417
ENSMUST00000092058	ENSMUSG00000074639	BC089597	chr10:127866473-127877317	87.9381	60.0824	0.549547	5e-05	0.00141417
ENSMUST00000044355	ENSMUSG00000041571	Sepw1	chr7:15917207-15922402	58.4655	35.9843	0.700218	5e-05	0.00141417
ENSMUST00000003183	ENSMUSG00000003099	Ppp5c	chr7:17004639-17027916	30.9237	23.8208	0.376489	0.00095	0.0182319
ENSMUST00000108775	ENSMUSG00000001995	Sipa1l2	chr8:125418062-125492710	4.37093	2.70752	0.690966	5e-05	0.00141417
ENSMUST00000081649	ENSMUSG00000060591	Ifitm2	chr7:140954838-140955961	101.499	67.2697	0.593444	5e-05	0.00141417
ENSMUST00000034218	ENSMUSG00000031766	Slc12a3	chr8:94329191-94366213	209.426	105.964	0.982867	5e-05	0.00141417
ENSMUST00000072093	ENSMUSG00000053646	Plxnb1	chr9:109095388-109119917	4.01752	2.55358	0.653788	5e-05	0.00141417
ENSMUST00000080208	ENSMUSG00000024044	Epb41l3	chr17:69156809-69289985	23.2933	15.2569	0.610451	0.0001	0.00265335
ENSMUST00000061826	ENSMUSG00000043300	B3galnt1	chr3:69574157-69598960	18.1656	12.3523	0.556423	5e-05	0.00141417
ENSMUST00000017836	ENSMUSG00000017692	Rhbdl3	chr11:80300911-80355955	0.990923	0.53456	0.890422	5e-05	0.00141417
ENSMUST00000064370	ENSMUSG00000052496	Pkdrej	chr15:85806971-85821733	2.39889	0.437802	2.45402	5e-05	0.00141417
ENSMUST00000026975	ENSMUSG00000025857	Dnaaf5	chr5:139150222-139186510	5.16191	3.75842	0.45778	0.00045	0.009687
ENSMUST00000010208	ENSMUSG00000010064	Slc38a3	chr9:107650633-107669530	5.34904	2.68421	0.994782	0.0001	0.00265335
ENSMUST00000110293	ENSMUSG00000042842	Serpinb6b	chr13:32965208-32979067	3.02049	2.04893	0.55991	0.001	0.0189868
ENSMUST00000098374	ENSMUSG00000020262	Adarb1	chr10:77290725-77418270	0.719709	0.248886	1.53193	0.0006	0.0124324
ENSMUST00000094666	ENSMUSG00000070720	Tmem200b	chr4:131921770-131923140	3.04768	1.70796	0.835434	5e-05	0.00141417
ENSMUST00000080817	ENSMUSG00000058761	Rnf169	chr7:99920256-99980458	13.0538	10.1588	0.361743	0.00075	0.0149651
ENSMUST00000165408	ENSMUSG00000018126	Baiap2l2	chr15:79258194-79285537	13.6991	10.0328	0.449358	0.00115	0.0213015
ENSMUST00000037145	ENSMUSG00000034918	Cdhr2	chr13:54701460-54736662	7.64702	4.5024	0.764203	5e-05	0.00141417
ENSMUST00000037141	ENSMUSG00000037111	Setd7	chr3:51515318-51560879	5.79857	3.56599	0.701393	5e-05	0.00141417
ENSMUST00000022947	ENSMUSG00000022324	Matn2	chr15:34306679-34436242	1.54695	0.847553	0.868049	0.0006	0.0124324
ENSMUST00000130300	ENSMUSG00000046318	Ccbe1	chr18:66060966-66291838	2.17373	0.926505	1.2303	5e-05	0.00141417
ENSMUST00000021632	ENSMUSG00000021211	Akr1c12	chr13:4268171-4279433	5.32779	2.33969	1.18722	5e-05	0.00141417
ENSMUST00000021634	ENSMUSG00000021213	Akr1c13	chr13:4191186-4205596	17.0622	7.81854	1.12583	5e-05	0.00141417
ENSMUST00000024049	ENSMUSG00000023279	Bmp15	chrX:6314106-6320721	0.437854	0.201205	1.12178	0.00105	0.019753
ENSMUST00000052837	ENSMUSG00000046532	Ar	chrX:98149720-98323215	24.1101	18.8504	0.355045	0.0015	0.0264906
ENSMUST00000052839	ENSMUSG00000031217	Efnb1	chrX:99136129-99148991	6.7307	5.13835	0.389451	0.0027	0.0426527
ENSMUST00000028612	ENSMUSG00000027188	Pamr1	chr2:102550011-102643041	2.08433	1.17646	0.825134	0.0001	0.00265335
ENSMUST00000025025	ENSMUSG00000024190	Dusp1	chr17:26505589-26508519	51.5423	17.6599	1.54528	5e-05	0.00141417
ENSMUST00000064231	ENSMUSG00000052396	Mogat2	chr7:99219083-99238619	15.3401	10.3956	0.561334	5e-05	0.00141417
ENSMUST00000064234	ENSMUSG00000052397	Ezr	chr17:6673609-6782784	154.471	121.444	0.34704	0.0013	0.0235944
ENSMUST00000138977	ENSMUSG00000078627	2019-03-10	chr11:105360797-105456735	1.45065	0.766359	0.920605	5e-05	0.00141417
ENSMUST00000098942	ENSMUSG00000074476	Spc24	chr9:21755441-21760286	2.31793	1.16272	0.99534	5e-05	0.00141417
ENSMUST00000117452	ENSMUSG00000053550	Shisa7	chr7:4825551-4844696	2.85231	1.7089	0.739067	5e-05	0.00141417
ENSMUST00000042647	ENSMUSG00000038167	Plekhg6	chr6:125362659-125380793	3.13925	1.51978	1.04656	5e-05	0.00141417
ENSMUST00000166004	ENSMUSG00000031833	Mast3	chr8:70778116-70792433	6.84924	4.00489	0.774183	5e-05	0.00141417
ENSMUST00000045912	ENSMUSG00000041984	Rptn	chr3:93393697-93399442	1.62354	0.582306	1.47929	5e-05	0.00141417
ENSMUST00000162997	ENSMUSG00000052557	Gan	chr8:117158134-117215997	2.63229	2.04547	0.363885	0.003	0.0461893
ENSMUST00000074989	ENSMUSG00000063382	Bcl9l	chr9:44499135-44510388	10.4664	6.61323	0.662332	5e-05	0.00141417
ENSMUST00000028944	ENSMUSG00000027452	Acss1	chr2:150618104-150668935	125.296	67.6782	0.888583	5e-05	0.00141417
ENSMUST00000022398	ENSMUSG00000021850	1700011H14Rik	chr14:49226357-49245428	87.0661	59.5409	0.54823	5e-05	0.00141417
ENSMUST00000029017	ENSMUSG00000027513	Pck1	chr2:173153047-173159273	1805.02	667.852	1.43441	5e-05	0.00141417
ENSMUST00000059091	ENSMUSG00000056025	Clca3a1	chr3:144729915-144760841	16.4639	4.33608	1.92485	5e-05	0.00141417
ENSMUST00000061799	ENSMUSG00000032334	Loxl1	chr9:58287722-58313212	3.85415	2.64758	0.541738	0.0004	0.00878381
ENSMUST00000099149	ENSMUSG00000025453	Nnt	chr13:119335447-119408997	69.5438	52.2267	0.413136	0.0006	0.0124324
ENSMUST00000028005	ENSMUSG00000026688	Mgst3	chr1:167371965-167393841	92.2178	66.9043	0.462947	5e-05	0.00141417
ENSMUST00000054769	ENSMUSG00000061132	Blnk	chr19:40928926-40994535	4.44508	2.40324	0.887228	5e-05	0.00141417
ENSMUST00000018522	ENSMUSG00000018378	Cuedc1	chr11:88099145-88194140	5.2972	3.05055	0.796161	5e-05	0.00141417
ENSMUST00000045243	ENSMUSG00000038170	Pde4dip	chr3:97689823-97888707	36.9962	27.4464	0.430762	0.0008	0.0157593
ENSMUST00000042561	ENSMUSG00000038178	Slc43a2	chr11:75531693-75577575	35.6546	18.8988	0.915796	5e-05	0.00141417
ENSMUST00000074082	ENSMUSG00000032786	Alas1	chr9:106233454-106248126	82.3799	53.9588	0.610435	5e-05	0.00141417
ENSMUST00000105357	ENSMUSG00000035504	Reep6	chr10:80329952-80336441	17.5898	8.77837	1.00271	5e-05	0.00141417
ENSMUST00000039559	ENSMUSG00000040152	Thbs1	chr2:118111875-118127133	12.841	7.00172	0.874979	5e-05	0.00141417
ENSMUST00000060095	ENSMUSG00000030306	Tmtc1	chr6:148232429-148444389	3.1196	1.68256	0.890708	5e-05	0.00141417
ENSMUST00000114913	ENSMUSG00000022840	Adcy5	chr16:35154876-35305737	0.966811	0.679183	0.509433	0.00265	0.0420006
ENSMUST00000061328	ENSMUSG00000045314	Sowahb	chr5:93041122-93045022	5.87218	4.44345	0.402215	0.0018	0.0306903
ENSMUST00000112568	ENSMUSG00000035168	Tanc1	chr2:59612041-59846149	9.36092	6.06384	0.626418	0.0001	0.00265335
ENSMUST00000101445	ENSMUSG00000045466	Zfp956	chr6:47953389-47965300	2.376	1.6684	0.510073	0.0026	0.0414406
ENSMUST00000090475	ENSMUSG00000012350	Ehf	chr2:103263432-103303278	5.03985	2.6632	0.920217	5e-05	0.00141417
ENSMUST00000065698	ENSMUSG00000053334	Ficd	chr5:113735802-113740600	3.52919	2.59992	0.440872	0.00325	0.0493611
ENSMUST00000151952	ENSMUSG00000026110	Mgat4a	chr1:37439339-37541016	3.83431	1.27526	1.58818	0.0012	0.0220581
ENSMUST00000150779	ENSMUSG00000054256	Msi1	chr5:115429598-115455698	0.554558	0.266694	1.05616	0.00195	0.0327838
ENSMUST00000043208	ENSMUSG00000034460	Six4	chr12:73099608-73113456	0.849221	0.564035	0.590355	0.00185	0.031399
ENSMUST00000001304	ENSMUSG00000001270	Ckb	chr12:111669354-111672338	22.7551	14.125	0.687942	5e-05	0.00141417
ENSMUST00000023672	ENSMUSG00000022951	Rcan1	chr16:92391952-92466146	70.5287	35.1062	1.00649	5e-05	0.00141417
ENSMUST00000074298	ENSMUSG00000024485	Slc4a9	chr18:36528156-36541293	4.97841	3.01658	0.722772	0.0002	0.00485099
ENSMUST00000020323	ENSMUSG00000020123	Avpr1a	chr10:122448498-122453453	2.4679	1.51913	0.700042	0.0001	0.00265335
ENSMUST00000196520	ENSMUSG00000104713	Gbp6	chr5:105214906-105293696	20.785	5.72417	1.8604	5e-05	0.00141417
ENSMUST00000024956	ENSMUSG00000024143	Rhoq	chr17:86963081-87025406	15.1254	11.5445	0.389766	0.002	0.0334664
ENSMUST00000024954	ENSMUSG00000024140	Epas1	chr17:86753906-86833410	41.6766	32.9482	0.339041	0.002	0.0334664
ENSMUST00000052380	ENSMUSG00000050957	Insl6	chr19:29321343-29325356	4.70147	2.8018	0.746758	0.0027	0.0426527
ENSMUST00000031304	ENSMUSG00000029359	Tesc	chr5:118027742-118061878	3.85129	2.29056	0.74964	0.0005	0.0106375
ENSMUST00000191899	ENSMUSG00000039952	Dag1	chr9:108204633-108263958	19.7129	14.2684	0.466321	0.0003	0.00690244
ENSMUST00000000095	ENSMUSG00000000093	Tbx2	chr11:85832550-85841948	18.7746	13.8326	0.44071	5e-05	0.00141417
ENSMUST00000084030	ENSMUSG00000065954	Tacc1	chr8:25154551-25201449	6.73257	3.85255	0.805344	5e-05	0.00141417
ENSMUST00000111380	ENSMUSG00000015843	Rxrg	chr1:167598383-167639623	0.749102	0.217121	1.78666	0.0001	0.00265335
ENSMUST00000181628	ENSMUSG00000079263	Gm6614	chr6:141971844-142011414	3.1924	0.478343	2.73853	5e-05	0.00141417
ENSMUST00000047349	ENSMUSG00000032267	Usp28	chr9:48985384-49042517	2.38681	1.72982	0.464463	0.00225	0.0368149
ENSMUST00000088373	ENSMUSG00000030257	Srgap3	chr6:112717970-112947266	1.88741	1.01191	0.89932	5e-05	0.00141417
ENSMUST00000049994	ENSMUSG00000048899	Rimkla	chr4:119465282-119492628	0.471335	0.234256	1.00867	0.0002	0.00485099
ENSMUST00000114355	ENSMUSG00000044628	Rnf208	chr2:25238817-25244262	5.30016	2.84912	0.895519	5e-05	0.00141417
ENSMUST00000041500	ENSMUSG00000032802	Srxn1	chr2:152081528-152111376	24.1467	18.0306	0.421379	0.0008	0.0157593
ENSMUST00000070923	ENSMUSG00000056665	Them6	chr15:74721203-74728034	11.7113	5.83225	1.00577	5e-05	0.00141417
ENSMUST00000104934	ENSMUSG00000058620	Adra2b	chr2:127363207-127367221	76.2986	46.8777	0.702756	5e-05	0.00141417
ENSMUST00000024857	ENSMUSG00000024063	Lbh	chr17:72918304-72941942	14.4593	8.85165	0.707976	5e-05	0.00141417
ENSMUST00000029686	ENSMUSG00000028051	Hcn3	chr3:89136141-89160196	3.5268	1.88662	0.902551	0.0004	0.00878381
ENSMUST00000034090	ENSMUSG00000031665	Sall1	chr8:89027247-89044162	14.9865	8.67734	0.78834	5e-05	0.00141417
ENSMUST00000034097	ENSMUSG00000031672	Got2	chr8:95864133-95888547	140.363	102.624	0.451795	5e-05	0.00141417
ENSMUST00000107359	ENSMUSG00000039270	Megf9	chr4:70427064-70534928	3.84847	2.19223	0.811885	5e-05	0.00141417
ENSMUST00000030643	ENSMUSG00000028838	Extl1	chr4:134356371-134372558	1.01306	0.388066	1.38434	5e-05	0.00141417
ENSMUST00000030645	ENSMUSG00000028841	Cnksr1	chr4:134228040-134238399	2.26154	1.53918	0.555139	0.00225	0.0368149
ENSMUST00000099623	ENSMUSG00000074968	Ano3	chr2:110655200-110950923	5.82027	2.19355	1.40782	5e-05	0.00141417
ENSMUST00000169449	ENSMUSG00000027894	Slc6a17	chr3:107467542-107518018	1.97676	1.39827	0.499493	0.0007	0.0141397
ENSMUST00000002850	ENSMUSG00000030834	Abcc6	chr7:45976379-46030302	3.30417	2.29719	0.524416	0.00015	0.00378624
ENSMUST00000071522	ENSMUSG00000057913	Gm10032	chr14:66784528-66793758	1.21436	0.25961	2.22578	5e-05	0.00141417
ENSMUST00000043650	ENSMUSG00000041930	Fam222a	chr5:114568015-114613220	1.56614	0.809029	0.95295	5e-05	0.00141417
ENSMUST00000022529	ENSMUSG00000021957	Tkt	chr14:30549130-30574722	74.0649	55.5511	0.414974	0.00015	0.00378624
ENSMUST00000095998	ENSMUSG00000044948	Cfap43	chr19:47894597-47919299	4.00171	2.506	0.675226	5e-05	0.00141417
ENSMUST00000044384	ENSMUSG00000035561	Aldh1b1	chr4:45799021-45804604	1.00657	0.487164	1.04697	5e-05	0.00141417
ENSMUST00000165774	ENSMUSG00000028270	Gbp2	chr3:142620601-142638008	8.79634	4.09659	1.10248	5e-05	0.00141417
ENSMUST00000080751	ENSMUSG00000062760	1810041L15Rik	chr15:84379202-84447097	0.405395	0.190089	1.09265	0.0007	0.0141397
ENSMUST00000182625	ENSMUSG00000051817	Sox12	chr2:152393610-152398063	3.89084	2.35184	0.726293	5e-05	0.00141417
ENSMUST00000032074	ENSMUSG00000079494	Cml5	chr6:85808023-85820972	114.533	48.5902	1.23703	5e-05	0.00141417
ENSMUST00000038287	ENSMUSG00000034765	Dusp5	chr19:53529108-53542431	1.15617	0.528511	1.12934	5e-05	0.00141417
ENSMUST00000124830	ENSMUSG00000054889	Dsp	chr13:38151327-38198577	2.89822	1.76059	0.719104	5e-05	0.00141417
ENSMUST00000027405	ENSMUSG00000026205	Slc23a3	chr1:75125540-75133890	3.03679	1.80692	0.749011	0.0001	0.00265335
ENSMUST00000036700	ENSMUSG00000033717	Adra2a	chr19:54045181-54048982	0.518332	0.266849	0.957851	0.00105	0.019753
ENSMUST00000050958	ENSMUSG00000049555	Tmie	chr9:110865710-110880113	3.6604	2.3855	0.617713	0.0001	0.00265335
ENSMUST00000113277	ENSMUSG00000026817	Ak1	chr2:32621757-32635058	8.02833	5.26083	0.609809	5e-05	0.00141417
ENSMUST00000028763	ENSMUSG00000027298	Tyro3	chr2:119797732-119818104	0.736103	0.388879	0.920585	5e-05	0.00141417
ENSMUST00000094807	ENSMUSG00000070802	Pnmal2	chr7:16944681-16948828	1.07528	0.668851	0.684957	0.00055	0.0115424
ENSMUST00000050234	ENSMUSG00000046380	Jrk	chr15:74702300-74709535	1.34849	0.896801	0.588486	0.00045	0.009687
ENSMUST00000164202	ENSMUSG00000043639	Rbm20	chr19:53677305-53867080	0.970342	0.450397	1.1073	5e-05	0.00141417
ENSMUST00000017637	ENSMUSG00000017493	Igfbp4	chr11:99041243-99054392	243.145	181.205	0.42419	0.0008	0.0157593
ENSMUST00000027643	ENSMUSG00000026394	Atp6v1g3	chr1:138273737-138289462	15.6894	11.3029	0.473098	0.00015	0.00378624
ENSMUST00000174064	ENSMUSG00000002985	Apoe	chr7:19696108-19699166	35.8963	21.4467	0.74308	0.0028	0.0438435
ENSMUST00000072113	ENSMUSG00000062373	Tmem65	chr15:58782268-58823530	12.9044	8.54671	0.594425	5e-05	0.00141417
ENSMUST00000028160	ENSMUSG00000026819	Slc25a25	chr2:32414486-32456953	10.5778	1.02167	3.37204	5e-05	0.00141417
ENSMUST00000035371	ENSMUSG00000038486	Sv2a	chr3:96181150-96195521	4.47915	2.43688	0.878189	5e-05	0.00141417
ENSMUST00000034934	ENSMUSG00000032375	Aph1b	chr9:66775201-66795490	5.20946	3.12344	0.737996	5e-05	0.00141417
ENSMUST00000106233	ENSMUSG00000025372	Baiap2	chr11:119942762-120006782	8.18051	4.44574	0.879769	0.0012	0.0220581
ENSMUST00000058213	ENSMUSG00000044819	Oxgr1	chr14:120019584-120042435	7.1629	4.66623	0.618286	5e-05	0.00141417
ENSMUST00000019721	ENSMUSG00000019577	Pdk4	chr6:5483350-5496309	4.27879	1.33531	1.68003	5e-05	0.00141417
ENSMUST00000016383	ENSMUSG00000016239	Lonrf3	chrX:36328352-36362341	7.54634	3.7068	1.0256	5e-05	0.00141417
ENSMUST00000065793	ENSMUSG00000053398	Phgdh	chr3:98313169-98339990	10.0166	6.33573	0.660804	5e-05	0.00141417
ENSMUST00000093166	ENSMUSG00000020340	Cyfip2	chr11:46193849-46312859	37.3199	26.8311	0.476041	5e-05	0.00141417
ENSMUST00000071858	ENSMUSG00000071379	Hpcal1	chr12:17690813-17791926	22.4243	16.2936	0.460761	0.00025	0.00588258
ENSMUST00000032413	ENSMUSG00000030275	Etnk1	chr6:143167220-143232307	44.0446	28.0571	0.6506	5e-05	0.00141417
ENSMUST00000031263	ENSMUSG00000029321	Slc10a6	chr5:103605710-103629403	0.529019	0.232505	1.18606	0.0014	0.0250158
ENSMUST00000019516	ENSMUSG00000075590	Nrbp2	chr15:76085594-76090013	6.95259	4.3278	0.683915	5e-05	0.00141417
ENSMUST00000014505	ENSMUSG00000014361	Mertk	chr2:128698955-128802894	20.6377	15.1984	0.441367	5e-05	0.00141417
ENSMUST00000117786	ENSMUSG00000022433	Csnk1e	chr15:79417855-79443919	3.12786	1.68713	0.890605	5e-05	0.00141417
ENSMUST00000001713	ENSMUSG00000001663	Gstt1	chr10:75783812-75798584	114.881	89.0429	0.367562	0.00095	0.0182319
ENSMUST00000081619	ENSMUSG00000053617	Sh3pxd2a	chr19:47260173-47464411	3.11211	2.24407	0.471776	0.00245	0.0394568
ENSMUST00000171436	ENSMUSG00000016664	Pacsin2	chr15:83375606-83464606	33.3678	21.1996	0.654419	5e-05	0.00141417
ENSMUST00000063694	ENSMUSG00000052040	Klf13	chr7:63886350-63938915	20.6162	11.8717	0.796258	5e-05	0.00141417
ENSMUST00000035645	ENSMUSG00000035969	Rusc2	chr4:43381978-43429134	2.22511	0.981249	1.18118	5e-05	0.00141417
ENSMUST00000017867	ENSMUSG00000017723	Wfdc2	chr2:164562578-164568510	74.3302	30.9366	1.26464	5e-05	0.00141417
ENSMUST00000038431	ENSMUSG00000038967	Pdk2	chr11:95026257-95041354	161.329	111.225	0.53653	5e-05	0.00141417
ENSMUST00000064347	ENSMUSG00000052485	Tmem171	chr13:98686234-98694834	4.02362	2.01573	0.997195	5e-05	0.00141417
ENSMUST00000010251	ENSMUSG00000063796	Slc22a8	chr19:8591253-8611834	155.744	111.097	0.487359	5e-05	0.00141417
ENSMUST00000030765	ENSMUSG00000028927	Padi2	chr4:140906343-140952586	0.409921	0.150473	1.44584	5e-05	0.00141417
ENSMUST00000049209	ENSMUSG00000035540	Gc	chr5:89354173-89457898	31.797	5.74816	2.46772	5e-05	0.00141417
ENSMUST00000049206	ENSMUSG00000021895	Arhgef3	chr14:27238038-27403904	19.2926	14.6154	0.400562	0.00055	0.0115424
ENSMUST00000095899	ENSMUSG00000096054	Syne1	chr10:5020202-5069063	4.08775	3.01783	0.437795	0.001	0.0189868
ENSMUST00000068258	ENSMUSG00000054951	9130008F23Rik	chr17:40875481-40880558	0.694326	0.296968	1.22531	0.0003	0.00690244
ENSMUST00000043464	ENSMUSG00000038545	Cul7	chr17:46650336-46664364	5.2685	3.78626	0.476618	0.0002	0.00485099
ENSMUST00000040344	ENSMUSG00000034707	Gns	chr10:121365089-121397245	104.094	78.5782	0.405687	0.0002	0.00485099
ENSMUST00000194641	ENSMUSG00000037174	Elf2	chr3:51252719-51340663	2.10894	1.0381	1.02257	0.0002	0.00485099
ENSMUST00000180358	ENSMUSG00000000776	Polr3d	chr14:70438747-70443471	4.81764	1.64087	1.55386	0.0001	0.00265335
ENSMUST00000128921	ENSMUSG00000005268	Prlr	chr15:10177654-10349180	6.69795	2.85486	1.2303	5e-05	0.00141417
ENSMUST00000037526	ENSMUSG00000035168	Tanc1	chr2:59612041-59846149	1.91487	0.936761	1.03149	0.00275	0.0432258
ENSMUST00000029929	ENSMUSG00000028262	Clca3a2	chr3:144796558-144819494	0.714663	0.250375	1.51318	5e-05	0.00141417
ENSMUST00000091291	ENSMUSG00000005534	Insr	chr8:3150921-3279617	26.1198	20.7431	0.332513	0.0027	0.0426527
ENSMUST00000103032	ENSMUSG00000020782	Llgl2	chr11:115824048-115855780	20.8519	13.559	0.620925	5e-05	0.00141417
ENSMUST00000079791	ENSMUSG00000005615	Pcyt1a	chr16:32430920-32475070	36.8239	27.6621	0.412731	0.0005	0.0106375
ENSMUST00000025075	ENSMUSG00000024232	Bambi	chr18:3507956-3516404	1.20346	0.814968	0.562371	0.0015	0.0264906
ENSMUST00000048375	ENSMUSG00000039157	Fam102a	chr2:32535332-32569756	26.9957	20.3575	0.407166	0.00035	0.00785859
ENSMUST00000046399	ENSMUSG00000033096	Apmap	chr2:150583079-150608567	58.7998	42.9888	0.45185	5e-05	0.00141417
ENSMUST00000053855	ENSMUSG00000046818	Ddit4l	chr3:137623671-137628333	2.12802	1.09693	0.956048	5e-05	0.00141417
ENSMUST00000071233	ENSMUSG00000058881	Zfp516	chr18:82910878-83005314	2.40643	1.73748	0.469893	0.0013	0.0235944
ENSMUST00000081339	ENSMUSG00000058392	Rrp1b	chr17:32036099-32062865	2.37477	1.22654	0.953193	5e-05	0.00141417
ENSMUST00000024839	ENSMUSG00000024042	Sik1	chr17:31844247-31855792	29.0866	16.7627	0.795102	5e-05	0.00141417
ENSMUST00000045942	ENSMUSG00000033726	Emx1	chr6:85187437-85204358	19.8979	14.6835	0.438419	0.0002	0.00485099
ENSMUST00000170629	ENSMUSG00000022385	Gtse1	chr15:85859706-85876572	0.39991	0.196932	1.02198	0.00315	0.0481278
ENSMUST00000106344	ENSMUSG00000025571	Tnrc6c	chr11:117654288-117763439	6.07925	4.39643	0.467559	0.0019	0.0321013
ENSMUST00000032492	ENSMUSG00000030342	Cd9	chr6:125460265-125494791	46.6957	31.5406	0.566077	5e-05	0.00141417
ENSMUST00000171970	ENSMUSG00000039004	Bmp6	chr13:38345715-38499728	22.957	17.1757	0.418564	0.00015	0.00378624
ENSMUST00000035148	ENSMUSG00000032548	Slco2a1	chr9:103008001-103090451	3.97128	3.04066	0.385218	0.0013	0.0235944
ENSMUST00000100249	ENSMUSG00000022468	Endou	chr15:97711018-97731405	2.42682	1.32553	0.872495	0.0009	0.0174274
ENSMUST00000030398	ENSMUSG00000028645	Slc2a1	chr4:119108710-119137983	9.49211	6.8832	0.463649	5e-05	0.00141417
ENSMUST00000106373	ENSMUSG00000030711	Sult1a1	chr7:126649308-126676432	11.9649	4.11421	1.54012	5e-05	0.00141417
ENSMUST00000037540	ENSMUSG00000032860	P2ry2	chr7:100996571-101011991	1.18193	0.531779	1.15224	5e-05	0.00141417
ENSMUST00000033842	ENSMUSG00000031461	Myom2	chr8:15057652-15133541	3.71315	2.67515	0.473024	0.00035	0.00785859
ENSMUST00000023143	ENSMUSG00000022500	Litaf	chr16:10959274-11066157	9.32821	7.05423	0.403111	0.0022	0.0361992
ENSMUST00000107977	ENSMUSG00000070604	Vsig10l	chr7:43463150-43472019	1.46099	0.641484	1.18746	5e-05	0.00141417
ENSMUST00000107691	ENSMUSG00000027993	Trim2	chr3:84160438-84305446	10.0619	7.71202	0.383726	0.0032	0.0487735
ENSMUST00000062678	ENSMUSG00000061032	Rrp1	chr10:78400361-78413043	42.4675	27.2147	0.641973	5e-05	0.00141417
ENSMUST00000169266	ENSMUSG00000005442	Cic	chr7:25267703-25294159	6.53116	4.91964	0.408788	0.002	0.0334664
ENSMUST00000118732	ENSMUSG00000050074	Spink8	chr9:109812279-109826633	8.51802	4.50507	0.918969	0.00225	0.0368149
ENSMUST00000068023	ENSMUSG00000054793	Cadm4	chr7:24482022-24504539	16.4042	8.77309	0.902906	5e-05	0.00141417
ENSMUST00000087321	ENSMUSG00000067279	Ppp1r3c	chr19:36731736-36736653	0.591484	0.304025	0.960151	0.0012	0.0220581
ENSMUST00000099946	ENSMUSG00000021215	Net1	chr13:3882564-3918220	60.5824	43.4022	0.481129	5e-05	0.00141417
ENSMUST00000120388	ENSMUSG00000024810	Il33	chr19:29919771-29960718	4.45502	1.59848	1.47873	5e-05	0.00141417
ENSMUST00000049676	ENSMUSG00000043029	Trpv3	chr11:73267387-73300363	0.548587	0.335593	0.709008	0.0016	0.0279374
ENSMUST00000078222	ENSMUSG00000000308	Ckmt1	chr2:121357713-121380940	27.7924	14.3868	0.94994	5e-05	0.00141417
ENSMUST00000071065	ENSMUSG00000056749	Nfil3	chr13:52967208-52981073	2.97098	1.09628	1.43833	5e-05	0.00141417
ENSMUST00000090601	ENSMUSG00000000416	Cttnbp2	chr6:18366564-18514821	3.77523	2.28002	0.727518	5e-05	0.00141417
ENSMUST00000164114	ENSMUSG00000044033	Ccdc141	chr2:77009901-77170635	6.42909	4.11694	0.643041	5e-05	0.00141417
ENSMUST00000073339	ENSMUSG00000006373	Pgrmc1	chrX:36598205-36606079	123.384	81.3364	0.60118	5e-05	0.00141417
ENSMUST00000029766	ENSMUSG00000028121	Bcar3	chr3:122419777-122530191	8.93887	5.65638	0.660214	5e-05	0.00141417
ENSMUST00000105365	ENSMUSG00000045193	Cirbp	chr10:80165984-80172786	31.9831	22.2833	0.521349	5e-05	0.00141417
ENSMUST00000106064	ENSMUSG00000028786	Tmem54	chr4:129105547-129122036	1.54271	0.569756	1.43705	0.0007	0.0141397
ENSMUST00000036300	ENSMUSG00000045672	Col27a1	chr4:63215434-63334991	17.3217	5.42712	1.67432	5e-05	0.00141417
ENSMUST00000018842	ENSMUSG00000018698	Lhx1	chr11:84518283-84525535	7.49831	5.79448	0.371886	0.00295	0.0455823
ENSMUST00000090190	ENSMUSG00000050240	Hic2	chr16:17233571-17263430	0.512277	0.248769	1.04212	0.0002	0.00485099
ENSMUST00000019038	ENSMUSG00000059248	2019-09-09	chr11:117199660-117362325	4.46803	2.35149	0.926063	0.0009	0.0174274
ENSMUST00000048064	ENSMUSG00000036523	Greb1	chr12:16670614-16800886	1.44294	0.734303	0.974564	5e-05	0.00141417
ENSMUST00000048068	ENSMUSG00000042659	Arrdc4	chr7:68737044-68749241	4.58146	3.44107	0.412952	0.0028	0.0438435
ENSMUST00000001455	ENSMUSG00000001419	Mef2d	chr3:88142371-88177706	7.02604	4.91113	0.516657	0.00275	0.0432258
ENSMUST00000109313	ENSMUSG00000078937	Cpt1b	chr15:89416404-89425863	6.03697	3.0043	1.0068	5e-05	0.00141417
ENSMUST00000036248	ENSMUSG00000038400	Pmepa1	chr2:173224457-173276533	5.74402	4.26304	0.430177	0.00065	0.0133036
ENSMUST00000179308	ENSMUSG00000095105	Edaradd	chr13:12471208-12520450	0.413064	0.12694	1.70222	5e-05	0.00141417
ENSMUST00000021649	ENSMUSG00000021226	Acot2	chr12:83987860-83993873	17.1812	12.4689	0.462493	0.00025	0.00588258
ENSMUST00000170794	ENSMUSG00000024247	Pkdcc	chr17:83215291-83225070	4.23655	2.72493	0.636668	0.0001	0.00265335
ENSMUST00000022692	ENSMUSG00000022097	Sftpc	chr14:70520940-70524081	7.46919	3.35871	1.15305	5e-05	0.00141417
ENSMUST00000112231	ENSMUSG00000048120	Entpd1	chr19:40612396-40741602	3.7309	2.10576	0.825182	5e-05	0.00141417
ENSMUST00000030487	ENSMUSG00000028715	Cyp4a14	chr4:115486199-115496142	156.061	5.54964	4.81357	5e-05	0.00141417
ENSMUST00000047334	ENSMUSG00000041248	Kcnj1	chr9:32369584-32399192	53.0555	41.8465	0.342394	0.0031	0.0474879
ENSMUST00000127206	ENSMUSG00000026360	Rgs2	chr1:143999337-144004161	5.42466	4.04264	0.424235	0.0017	0.0293704
ENSMUST00000095753	ENSMUSG00000071337	Tia1	chr6:86404218-86433405	2.8293	1.81751	0.638478	0.00075	0.0149651
ENSMUST00000032766	ENSMUSG00000030549	Rhcg	chr7:79593362-79617657	28.2913	15.3138	0.885528	5e-05	0.00141417
ENSMUST00000032761	ENSMUSG00000030545	Pex11a	chr7:79735956-79743080	21.874	15.4338	0.503119	5e-05	0.00141417
ENSMUST00000046502	ENSMUSG00000040661	Rad54l2	chr9:106688081-106789194	8.96277	7.06556	0.34314	0.0016	0.0279374
ENSMUST00000080141	ENSMUSG00000063296	Tmem117	chr15:94629184-95096097	7.16115	4.59956	0.638695	5e-05	0.00141417
ENSMUST00000102961	ENSMUSG00000028444	Cntfr	chr4:41657497-41697089	2.71896	1.30163	1.06274	5e-05	0.00141417
ENSMUST00000003620	ENSMUSG00000003526	Prodh	chr16:18052859-18090203	187.785	127.459	0.559052	5e-05	0.00141417
ENSMUST00000022322	ENSMUSG00000021794	Glud1	chr14:34310726-34345144	262.555	142.384	0.882828	5e-05	0.00141417
ENSMUST00000008094	ENSMUSG00000007950	Abhd8	chr8:71456699-71463657	6.20266	4.49658	0.464059	0.00135	0.0242813
ENSMUST00000030317	ENSMUSG00000028583	Pdpn	chr4:143267430-143299564	3.91917	2.29008	0.775152	5e-05	0.00141417
ENSMUST00000078647	ENSMUSG00000030055	Rab43	chr6:87788852-87838798	15.8135	12.002	0.397885	0.00275	0.0432258
ENSMUST00000020413	ENSMUSG00000020193	Zpbp	chr11:11279625-11462408	0.459557	0.230527	0.995307	0.0008	0.0157593
ENSMUST00000098244	ENSMUSG00000073988	Ttpa	chr4:20007937-20030785	11.6356	4.95204	1.23246	5e-05	0.00141417
ENSMUST00000098242	ENSMUSG00000073987	Ggh	chr4:20042051-20066750	13.9902	9.48865	0.560139	5e-05	0.00141417
ENSMUST00000065587	ENSMUSG00000044337	Ackr3	chr1:90203979-90216751	18.6822	12.8952	0.534831	5e-05	0.00141417
ENSMUST00000068603	ENSMUSG00000021676	Iqgap2	chr13:95627176-95891922	31.5545	21.8817	0.528125	5e-05	0.00141417
ENSMUST00000049544	ENSMUSG00000044033	Ccdc141	chr2:77009901-77170635	1.30294	0.70846	0.879007	0.00175	0.0300127
ENSMUST00000040791	ENSMUSG00000038879	Nipal2	chr15:34572798-34678706	1.41866	0.670283	1.08168	5e-05	0.00141417
ENSMUST00000088779	ENSMUSG00000067925	Cxx1a	chrX:53642487-53643682	12.579	9.22098	0.448023	0.00235	0.038101
ENSMUST00000088778	ENSMUSG00000067924	Cxx1b	chrX:53669176-53670408	19.2265	13.4237	0.518312	0.0001	0.00265335
ENSMUST00000042534	ENSMUSG00000032878	Ccdc85a	chr11:28385684-28584324	0.759826	0.300648	1.3376	0.00045	0.009687
ENSMUST00000160860	ENSMUSG00000014164	Klhl3	chr13:58004220-58113592	11.8336	6.78959	0.801487	5e-05	0.00141417
ENSMUST00000041982	ENSMUSG00000037548	H2-DMb2	chr17:34145270-34151553	22.4055	3.5495	2.65816	5e-05	0.00141417
ENSMUST00000109621	ENSMUSG00000043668	Tox3	chr8:90247039-90348343	1.97689	1.33722	0.563995	0.00235	0.038101
ENSMUST00000105502	ENSMUSG00000048756	Foxo3	chr10:42181840-42276755	35.3535	16.3321	1.11414	5e-05	0.00141417
ENSMUST00000023849	ENSMUSG00000023087	Noct	chr3:51224446-51251644	11.7945	0.677503	4.12175	0.0004	0.00878381
ENSMUST00000026367	ENSMUSG00000025323	Sp4	chr12:118234932-118301440	3.38041	2.52124	0.423061	0.00095	0.0182319
ENSMUST00000126534	ENSMUSG00000033685	Ucp2	chr7:100493336-100502020	9.71727	4.68405	1.0528	5e-05	0.00141417
ENSMUST00000037287	ENSMUSG00000037664	Cdkn1c	chr7:143458349-143461050	13.6464	6.81811	1.00107	5e-05	0.00141417
ENSMUST00000103108	ENSMUSG00000035112	Wnk4	chr11:101260597-101277409	34.9762	19.1924	0.865836	5e-05	0.00141417
ENSMUST00000033056	ENSMUSG00000030793	Pycard	chr7:127989707-127993867	1.88229	1.26233	0.576399	0.001	0.0189868
ENSMUST00000032909	ENSMUSG00000030671	Pde3b	chr7:114415280-114539251	4.63467	2.50574	0.887231	5e-05	0.00141417
ENSMUST00000115576	ENSMUSG00000047786	Lix1	chr17:17402671-17459387	0.780227	0.414176	0.91365	0.0001	0.00265335
ENSMUST00000174189	ENSMUSG00000047146	Tet1	chr10:62804569-62899118	1.24682	0.62031	1.00719	5e-05	0.00141417
ENSMUST00000093852	ENSMUSG00000066687	Zbtb16	chr9:48654310-48835945	11.1343	1.63943	2.76375	5e-05	0.00141417
ENSMUST00000109422	ENSMUSG00000022383	Ppara	chr15:85735563-85802819	37.9586	21.4224	0.825302	5e-05	0.00141417
ENSMUST00000094077	ENSMUSG00000018476	Kdm6b	chr11:69398507-69413675	12.6506	9.39403	0.429394	5e-05	0.00141417
ENSMUST00000027697	ENSMUSG00000026437	Cdk18	chr1:132112236-132142800	22.4963	11.0687	1.0232	5e-05	0.00141417
ENSMUST00000020378	ENSMUSG00000020169	Best3	chr10:116986313-117025040	0.455094	0.18326	1.31228	0.0004	0.00878381
ENSMUST00000109986	ENSMUSG00000037110	Ralgapa2	chr2:146239878-146512004	9.20391	6.91765	0.411965	0.00085	0.0165966
ENSMUST00000038863	ENSMUSG00000035202	Lars2	chr9:123366939-123462664	24.9716	18.4585	0.436004	5e-05	0.00141417
ENSMUST00000049985	ENSMUSG00000044156	Hepacam2	chr6:3457095-3498298	5.90776	3.32846	0.827757	5e-05	0.00141417
ENSMUST00000055077	ENSMUSG00000047986	Palm3	chr8:84021470-84042575	2.89105	1.94973	0.568316	0.00135	0.0242813
ENSMUST00000022616	ENSMUSG00000022037	Clu	chr14:65968482-65981548	108.496	54.4136	0.995609	5e-05	0.00141417
ENSMUST00000018965	ENSMUSG00000018821	Avpi1	chr19:42123272-42129059	13.3879	9.73711	0.459365	0.00175	0.0300127
ENSMUST00000025254	ENSMUSG00000024395	Lims2	chr18:31931506-31958619	21.0959	15.1125	0.48122	0.00035	0.00785859
ENSMUST00000105041	ENSMUSG00000079507	H2-Q1	chr17:35320546-35325099	2.31634	1.16794	0.987875	0.0001	0.00265335
ENSMUST00000126532	ENSMUSG00000075254	Heg1	chr16:33684465-33787112	4.35572	2.67382	0.70401	0.00235	0.038101
ENSMUST00000028995	ENSMUSG00000027495	Fam210b	chr2:172345564-172355749	6.4398	4.69961	0.454475	0.0004	0.00878381
ENSMUST00000107596	ENSMUSG00000038453	Srcin1	chr11:97509339-97575215	3.45515	2.13805	0.69245	5e-05	0.00141417
ENSMUST00000020948	ENSMUSG00000020620	Abca8b	chr11:109932189-109995845	1.08288	0.530803	1.02862	5e-05	0.00141417
ENSMUST00000009058	ENSMUSG00000028970	Abcb1b	chr5:8798185-8866315	5.35136	2.58929	1.04735	5e-05	0.00141417
ENSMUST00000061745	ENSMUSG00000050368	Hoxd10	chr2:74682322-74695105	8.85569	5.00319	0.823756	5e-05	0.00141417
ENSMUST00000027067	ENSMUSG00000025934	Gsta3	chr1:21240588-21271593	61.7034	45.7809	0.430605	0.00075	0.0149651
ENSMUST00000023760	ENSMUSG00000023019	Gpd1	chr15:99717514-99725005	167.416	132.96	0.332453	0.00285	0.0444141
ENSMUST00000107094	ENSMUSG00000052684	Jun	chr4:95049033-95067422	17.7367	9.25217	0.938875	5e-05	0.00141417
ENSMUST00000114583	ENSMUSG00000071477	Zfp777	chr6:48024187-48048911	5.7789	3.14544	0.877532	5e-05	0.00141417
ENSMUST00000034834	ENSMUSG00000032294	Pkm	chr9:59656367-59679375	71.2917	40.4595	0.817258	5e-05	0.00141417
ENSMUST00000163123	ENSMUSG00000054640	Slc8a1	chr17:81388690-81649607	131.356	50.8287	1.36976	5e-05	0.00141417
ENSMUST00000184945	ENSMUSG00000052512	Nav2	chr7:48959096-49610090	3.80023	2.04333	0.895166	5e-05	0.00141417
ENSMUST00000086199	ENSMUSG00000026473	Glul	chr1:153849541-153909723	398.002	234.301	0.764417	5e-05	0.00141417
ENSMUST00000086195	ENSMUSG00000066797	Zfp648	chr1:154201186-154205689	0.985586	0.356143	1.46853	5e-05	0.00141417
ENSMUST00000102584	ENSMUSG00000029591	Ung	chr5:114130385-114139323	0.746143	0.390429	0.93439	0.00285	0.0444141
ENSMUST00000031040	ENSMUSG00000029154	Cwh43	chr5:73406074-73453435	9.25577	4.01433	1.20519	5e-05	0.00141417
ENSMUST00000041123	ENSMUSG00000035638	Muc20	chr16:32735885-32797435	1.21062	0.570896	1.08444	0.0002	0.00485099
ENSMUST00000041124	ENSMUSG00000040209	Zfp704	chr3:9427019-9610085	13.771	10.6951	0.364682	0.00075	0.0149651
ENSMUST00000097530	ENSMUSG00000024561	Mbd1	chr18:74268271-74282685	11.7869	8.30583	0.504991	0.0001	0.00265335
ENSMUST00000150290	ENSMUSG00000050335	Lgals3	chr14:47367750-47386160	20.6299	12.1615	0.762424	5e-05	0.00141417
ENSMUST00000161017	ENSMUSG00000026494	Kif26b	chr1:178529124-178939200	0.531696	0.254031	1.0656	5e-05	0.00141417
ENSMUST00000168536	ENSMUSG00000025041	Nt5c2	chr19:46886830-47025327	8.64213	5.57332	0.63285	0.00265	0.0420006
ENSMUST00000113742	ENSMUSG00000079492	Gm11127	chr17:36042960-36058645	7.08266	4.75992	0.573355	0.0006	0.0124324
ENSMUST00000105283	ENSMUSG00000019966	Kitl	chr10:100015629-100100413	5.724	4.38957	0.382945	0.0022	0.0361992
ENSMUST00000034478	ENSMUSG00000031995	St14	chr9:31089401-31131853	9.71475	4.9689	0.967251	5e-05	0.00141417
ENSMUST00000033975	ENSMUSG00000061313	Ddhd2	chr8:25725323-25754280	7.55625	5.5178	0.453579	0.0002	0.00485099
ENSMUST00000033979	ENSMUSG00000031574	Star	chr8:25808473-25814723	1.22642	0.769476	0.672504	0.00165	0.0286638
ENSMUST00000060500	ENSMUSG00000050192	Eif5a2	chr3:28781275-28798846	2.87107	2.14306	0.421917	0.003	0.0461893
ENSMUST00000020522	ENSMUSG00000020277	Pfkl	chr10:77986946-78009807	12.7246	9.36138	0.442823	0.00015	0.00378624
ENSMUST00000020524	ENSMUSG00000020282	Rhbdf1	chr11:32209584-32222300	10.4141	6.8684	0.60049	5e-05	0.00141417
ENSMUST00000088386	ENSMUSG00000025557	Slc15a1	chr14:121459620-121505254	0.712881	0.332274	1.10129	5e-05	0.00141417
ENSMUST00000118962	ENSMUSG00000030731	Syt3	chr7:44384101-44400187	2.56473	1.47165	0.801378	0.0002	0.00485099
ENSMUST00000118960	ENSMUSG00000090236	Car15	chr16:17835275-17838364	55.9	31.3314	0.835241	5e-05	0.00141417
ENSMUST00000109728	ENSMUSG00000027488	Snta1	chr2:154376312-154408099	25.418	15.007	0.760219	5e-05	0.00141417
ENSMUST00000057979	ENSMUSG00000022383	Ppara	chr15:85735563-85802819	25.7532	15.2121	0.759529	0.00035	0.00785859
ENSMUST00000049948	ENSMUSG00000024654	Asrgl1	chr19:9109867-9135636	3.38223	2.00911	0.751418	5e-05	0.00141417
ENSMUST00000056623	ENSMUSG00000048108	Tmem72	chr6:116679062-116716913	23.9111	17.6985	0.434053	5e-05	0.00141417
ENSMUST00000051017	ENSMUSG00000044748	Defb1	chr8:21776598-21795185	251.953	113.879	1.14565	5e-05	0.00141417
ENSMUST00000051014	ENSMUSG00000034584	Exph5	chr9:53301669-53377514	5.47181	3.27807	0.73917	5e-05	0.00141417
ENSMUST00000159365	ENSMUSG00000045875	Adra1a	chr14:66635250-66733462	10.0249	5.99501	0.741759	5e-05	0.00141417
ENSMUST00000041686	ENSMUSG00000037349	Nudt22	chr19:6993017-6996117	13.8754	10.2899	0.431301	0.0032	0.0487735
ENSMUST00000040487	ENSMUSG00000039096	Rsad1	chr11:94539797-94549199	2.07074	1.48261	0.482002	0.00225	0.0368149
ENSMUST00000040489	ENSMUSG00000024727	Trpm6	chr19:18749982-18892510	5.66202	2.40215	1.23699	5e-05	0.00141417
ENSMUST00000051906	ENSMUSG00000059708	Akap17b	chrX:36608313-36645395	1.28193	0.871341	0.557009	0.0016	0.0279374
ENSMUST00000092445	ENSMUSG00000045775	Slc16a5	chr11:115462044-115474398	3.5721	1.3611	1.392	5e-05	0.00141417
ENSMUST00000048486	ENSMUSG00000033860	Fgg	chr3:82876704-83015049	12.6618	5.3224	1.25033	5e-05	0.00141417
ENSMUST00000085453	ENSMUSG00000041696	Rasl12	chr9:65398487-65422773	1.56128	0.737111	1.08278	0.0011	0.020454
ENSMUST00000094134	ENSMUSG00000070427	Il18bp	chr7:102015078-102018155	5.28063	1.85625	1.50832	5e-05	0.00141417
ENSMUST00000055738	ENSMUSG00000031431	Tsc22d3	chrX:140539527-140600659	56.9459	29.0522	0.970947	5e-05	0.00141417
ENSMUST00000035115	ENSMUSG00000032528	Vipr1	chr9:121642715-121672954	0.495405	0.251718	0.976804	0.00015	0.00378624
ENSMUST00000107909	ENSMUSG00000069769	Msi2	chr11:88339381-88718513	30.5001	22.6198	0.431227	0.0002	0.00485099
ENSMUST00000048976	ENSMUSG00000033910	Gucy1a3	chr3:82092426-82145787	6.32418	4.57436	0.467309	0.0005	0.0106375
ENSMUST00000068904	ENSMUSG00000023039	Krt7	chr15:101411102-101430313	11.9502	6.37063	0.907531	5e-05	0.00141417
ENSMUST00000014920	ENSMUSG00000014776	Nol3	chr8:105276446-105289528	1.44209	0.74402	0.954748	0.0004	0.00878381
ENSMUST00000051209	ENSMUSG00000002265	Peg3	chr7:6703891-6730421	4.5907	3.41109	0.428479	0.00025	0.00588258
ENSMUST00000048116	ENSMUSG00000041313	Slc7a1	chr5:148327409-148399904	1.22336	0.8126	0.590237	0.00015	0.00378624
ENSMUST00000042818	ENSMUSG00000035828	Pim3	chr15:88862185-88865718	96.9393	49.8448	0.959639	5e-05	0.00141417
ENSMUST00000031901	ENSMUSG00000036899	Trpv5	chr6:41652172-41680769	9.79194	3.37252	1.53777	5e-05	0.00141417
ENSMUST00000027233	ENSMUSG00000026065	Slc9a4	chr1:40580080-40630725	0.733041	0.284797	1.36396	5e-05	0.00141417
ENSMUST00000042118	ENSMUSG00000038415	Foxq1	chr13:31556133-31560976	3.95973	1.77149	1.16044	5e-05	0.00141417
ENSMUST00000059589	ENSMUSG00000043811	Rtn4r	chr16:18127641-18152408	2.42167	1.37204	0.819673	5e-05	0.00141417
ENSMUST00000004051	ENSMUSG00000003949	Hlf	chr11:90336535-90390895	49.7479	33.238	0.581804	5e-05	0.00141417
ENSMUST00000020171	ENSMUSG00000019997	Ctgf	chr10:24549446-24598683	34.3614	16.1083	1.09299	5e-05	0.00141417
ENSMUST00000105993	ENSMUSG00000078532	Nkain1	chr4:130531617-130574173	1.47772	0.364574	2.01909	5e-05	0.00141417
ENSMUST00000055676	ENSMUSG00000045092	S1pr1	chr3:115710432-115715072	3.92785	2.84023	0.467731	0.00165	0.0286638
ENSMUST00000108258	ENSMUSG00000037661	Gpr160	chr3:30855949-30897192	4.60215	2.43496	0.918406	0.0002	0.00485099
ENSMUST00000088013	ENSMUSG00000036098	Myrf	chr19:10208271-10240748	4.02988	2.66066	0.598949	5e-05	0.00141417
ENSMUST00000049874	ENSMUSG00000050103	Agmo	chr12:37241640-37582202	17.7349	9.52007	0.89755	5e-05	0.00141417
ENSMUST00000029516	ENSMUSG00000027908	Tchhl1	chr3:93468753-93471980	3.18066	1.25197	1.34512	5e-05	0.00141417
ENSMUST00000124158	ENSMUSG00000039652	Cpeb3	chr19:37021290-37222139	15.1934	8.41346	0.852676	5e-05	0.00141417
ENSMUST00000014957	ENSMUSG00000014813	Stc1	chr14:69029288-69041401	3.98407	2.06539	0.947828	5e-05	0.00141417
ENSMUST00000025554	ENSMUSG00000024653	Scgb1a1	chr19:9083635-9087958	27.5863	12.8567	1.10143	5e-05	0.00141417
ENSMUST00000108496	ENSMUSG00000001918	Slc1a5	chr7:16781339-16798274	7.21653	4.45091	0.697206	5e-05	0.00141417
ENSMUST00000173287	ENSMUSG00000070469	Adamtsl3	chr7:82335731-82614450	0.774639	0.170623	2.18272	5e-05	0.00141417
ENSMUST00000089519	ENSMUSG00000057230	Aak1	chr6:86849516-87003223	9.86511	7.81521	0.33605	0.00235	0.038101
ENSMUST00000113677	ENSMUSG00000039686	Zer1	chr2:30097282-30124582	8.0344	5.87562	0.451449	0.0003	0.00690244
ENSMUST00000023617	ENSMUSG00000022900	Ildr1	chr16:36693977-36726804	3.73327	2.49163	0.583351	0.00035	0.00785859
ENSMUST00000177768	ENSMUSG00000095595	Fam177a	chr12:55124527-55142078	3.16628	2.25725	0.488224	0.0008	0.0157593
ENSMUST00000031674	ENSMUSG00000029664	Tfpi2	chr6:3962594-3988919	6.88451	4.69668	0.551714	0.0009	0.0174274
ENSMUST00000169504	ENSMUSG00000022019	Tdrd3	chr14:87416638-87545373	4.8922	2.77681	0.817052	5e-05	0.00141417
ENSMUST00000098458	ENSMUSG00000044244	Il20rb	chr9:100457718-100486788	0.389942	0.161991	1.26735	0.00105	0.019753
ENSMUST00000018993	ENSMUSG00000018849	Wwc1	chr11:35838399-35980527	45.2838	32.7166	0.468971	5e-05	0.00141417
ENSMUST00000067268	ENSMUSG00000029528	Pxn	chr5:115506675-115555987	37.2575	29.5719	0.333306	0.0032	0.0487735
ENSMUST00000125123	ENSMUSG00000060317	Acnat2	chr4:49379839-49408151	138.967	45.0871	1.62396	5e-05	0.00141417
ENSMUST00000106231	ENSMUSG00000025372	Baiap2	chr11:119942762-120006782	3.8499	1.79281	1.1026	0.001	0.0189868
ENSMUST00000021458	ENSMUSG00000021061	Sptb	chr12:76580487-76710547	0.476909	0.237842	1.00371	0.0003	0.00690244
ENSMUST00000005685	ENSMUSG00000005547	Cyp2a5	chr7:26835304-26843548	217.644	106.109	1.03642	5e-05	0.00141417
ENSMUST00000035194	ENSMUSG00000032577	Mapkapk3	chr9:107254926-107289877	3.96471	2.86055	0.470926	0.00225	0.0368149
ENSMUST00000029030	ENSMUSG00000027524	Edn3	chr2:174760618-174784042	1.07202	0.5863	0.870617	0.00015	0.00378624
ENSMUST00000023133	ENSMUSG00000022490	Ppp1r1a	chr15:103530278-103537992	50.6836	38.3393	0.402697	0.0005	0.0106375
ENSMUST00000036643	ENSMUSG00000040485	Lrrc52	chr1:167445668-167466780	2.37474	1.36592	0.797904	0.00155	0.0272269
ENSMUST00000033169	ENSMUSG00000030878	Cdr2	chr7:120957035-120982312	56.6956	36.0236	0.654295	5e-05	0.00141417
ENSMUST00000033161	ENSMUSG00000030873	Scnn1b	chr7:121865037-121981711	16.3871	9.44514	0.79492	5e-05	0.00141417
ENSMUST00000099126	ENSMUSG00000074622	Mafb	chr2:160363702-160367065	8.54381	4.73458	0.851642	5e-05	0.00141417
ENSMUST00000059619	ENSMUSG00000049521	Cdc42ep1	chr15:78842646-78855529	7.70252	5.83805	0.399843	0.00165	0.0286638
ENSMUST00000079573	ENSMUSG00000030287	Itpr2	chr6:146108298-146502178	5.54326	3.82757	0.534306	0.0019	0.0321013
ENSMUST00000055966	ENSMUSG00000031343	Gabra3	chrX:72432680-72656848	0.997279	0.45341	1.13718	5e-05	0.00141417
ENSMUST00000025161	ENSMUSG00000024308	Tapbp	chr17:33915898-33929288	36.7911	24.9869	0.558186	0.0001	0.00265335
ENSMUST00000057423	ENSMUSG00000051373	Ppapdc3	chr2:32095527-32110820	1.06768	0.52181	1.03289	0.00065	0.0133036
ENSMUST00000021567	ENSMUSG00000021140	Pcnx	chr12:81860029-82000924	6.52423	5.12149	0.349244	0.0015	0.0264906
ENSMUST00000076352	ENSMUSG00000044734	Serpinb1a	chr13:32842091-32851185	6.5516	4.10852	0.673229	5e-05	0.00141417
ENSMUST00000076354	ENSMUSG00000058254	Tspan7	chrX:10485157-10596605	21.1164	11.7076	0.850921	5e-05	0.00141417
ENSMUST00000190686	ENSMUSG00000039218	Srrm2	chr17:23790661-23829109	52.8473	40.0466	0.400149	0.00155	0.0272269
ENSMUST00000107289	ENSMUSG00000028399	Ptprd	chr4:75941237-76594299	31.1548	22.6388	0.460656	0.00235	0.038101
ENSMUST00000046071	ENSMUSG00000042115	Klhdc8a	chr1:132298625-132307357	3.92088	2.14717	0.868738	5e-05	0.00141417
ENSMUST00000148810	ENSMUSG00000026483	Fam129a	chr1:151571185-151721939	3.87076	2.82554	0.454091	0.00035	0.00785859
ENSMUST00000040576	ENSMUSG00000034981	Parm1	chr5:91517614-91626894	1.30079	0.859677	0.597523	0.0007	0.0141397
ENSMUST00000005256	ENSMUSG00000005125	Ndrg1	chr15:66929320-67013039	683.547	376.174	0.861639	5e-05	0.00141417
ENSMUST00000162645	ENSMUSG00000007817	Zmiz1	chr14:25455736-25666743	20.354	14.4936	0.489898	5e-05	0.00141417
ENSMUST00000027800	ENSMUSG00000026519	Tmem63a	chr1:180942343-180975112	4.67596	2.93034	0.674194	5e-05	0.00141417
ENSMUST00000027802	ENSMUSG00000026520	Pycr2	chr1:180904292-180908088	7.21222	4.52853	0.671401	5e-05	0.00141417
ENSMUST00000084512	ENSMUSG00000065954	Tacc1	chr8:25154551-25201449	7.66814	4.95287	0.630611	0.0008	0.0157593
ENSMUST00000044286	ENSMUSG00000039199	Zdhhc1	chr8:105472480-105484350	5.03259	3.59395	0.48573	0.00295	0.0455823
ENSMUST00000105894	ENSMUSG00000003644	Rps6ka1	chr4:133847289-133887797	5.57464	2.57848	1.11236	5e-05	0.00141417
ENSMUST00000001347	ENSMUSG00000001313	Rnd2	chr11:101468174-101471853	7.35074	4.44228	0.726591	5e-05	0.00141417
ENSMUST00000021693	ENSMUSG00000021265	Slc25a29	chr12:108825872-108835883	2.20929	1.30786	0.756373	0.00025	0.00588258
ENSMUST00000008991	ENSMUSG00000067889	Sptbn2	chr19:4711207-4752353	4.91825	2.80662	0.809311	5e-05	0.00141417
ENSMUST00000020340	ENSMUSG00000020131	Pcsk4	chr10:80321282-80329498	0.765845	0.347254	1.14106	0.0001	0.00265335
ENSMUST00000015791	ENSMUSG00000015647	Lama5	chr2:180176372-180225859	12.5024	7.51966	0.733469	5e-05	0.00141417
ENSMUST00000036554	ENSMUSG00000032849	Abcc4	chr14:118482691-118706219	32.4039	12.2467	1.40378	5e-05	0.00141417
ENSMUST00000036555	ENSMUSG00000033590	Myo5c	chr9:75232013-75305451	1.13458	0.731153	0.633909	5e-05	0.00141417
ENSMUST00000049357	ENSMUSG00000040128	Pnrc1	chr4:33245422-33248510	46.1375	29.7953	0.630855	5e-05	0.00141417
ENSMUST00000094451	ENSMUSG00000047875	Gpr157	chr4:150087364-150105927	0.463617	0.209787	1.14401	5e-05	0.00141417
ENSMUST00000094452	ENSMUSG00000063430	Wscd2	chr5:113490446-113589725	1.226	0.668501	0.874956	5e-05	0.00141417
ENSMUST00000019749	ENSMUSG00000027102	Hoxd8	chr2:74703247-74748271	29.89	16.2596	0.878372	5e-05	0.00141417
ENSMUST00000035266	ENSMUSG00000078853	Igtp	chr11:58199555-58222779	19.007	10.3562	0.876038	0.00025	0.00588258
ENSMUST00000102476	ENSMUSG00000060802	B2m	chr2:122120107-122186189	559.486	358.427	0.642422	5e-05	0.00141417
ENSMUST00000053068	ENSMUSG00000048138	Dmrt2	chr19:25672419-25679010	1.39295	0.717312	0.957474	5e-05	0.00141417
ENSMUST00000100012	ENSMUSG00000039166	Akap7	chr10:25169089-25307870	4.99992	3.23214	0.629414	0.00115	0.0213015
ENSMUST00000022437	ENSMUSG00000021884	Hacl1	chr14:31607225-31640964	40.8092	18.4862	1.14245	5e-05	0.00141417
ENSMUST00000029374	ENSMUSG00000027799	Nbea	chr3:55625194-56183701	4.80899	3.59454	0.41993	0.0001	0.00265335
ENSMUST00000069507	ENSMUSG00000073418	C4b	chr17:34728379-34743882	25.2265	6.25752	2.01128	5e-05	0.00141417
ENSMUST00000030669	ENSMUSG00000028854	Slc9a1	chr4:133369705-133423702	7.25664	5.00316	0.536463	5e-05	0.00141417
ENSMUST00000049093	ENSMUSG00000038393	Txnip	chr3:96557956-96561883	55.803	29.9026	0.900071	5e-05	0.00141417
ENSMUST00000114232	ENSMUSG00000079547	H2-DMb1	chr17:34153071-34160230	3.43099	0.628618	2.44837	5e-05	0.00141417
ENSMUST00000178344	ENSMUSG00000095115	Itpripl2	chr7:118485113-118491975	2.85837	2.17657	0.393137	0.00195	0.0327838
ENSMUST00000045105	ENSMUSG00000024533	Spire1	chr18:67488208-67552777	6.81648	4.90824	0.473821	0.0004	0.00878381
ENSMUST00000031734	ENSMUSG00000093445	Lrch4	chr5:137629120-137641099	9.02357	5.70656	0.661077	5e-05	0.00141417
ENSMUST00000031736	ENSMUSG00000029722	Agfg2	chr5:137650462-137684726	14.9826	8.82993	0.762814	0.0001	0.00265335
ENSMUST00000031731	ENSMUSG00000029718	Pcolce	chr5:137605102-137629002	22.252	14.8473	0.583738	5e-05	0.00141417
ENSMUST00000027467	ENSMUSG00000026249	Serpine2	chr1:79794196-79861180	5.79526	3.93622	0.558063	0.0001	0.00265335
ENSMUST00000113298	ENSMUSG00000075044	Slc22a29	chr19:8160164-8218899	4.44641	1.9945	1.15661	5e-05	0.00141417
ENSMUST00000036188	ENSMUSG00000042677	Zc3h12a	chr4:125118422-125127840	1.75506	1.13479	0.629086	0.00125	0.0228388
ENSMUST00000036181	ENSMUSG00000038526	Car14	chr3:95893968-95904691	135.175	95.8336	0.496225	0.0005	0.0106375
ENSMUST00000039323	ENSMUSG00000042510	AA986860	chr1:130731975-130744622	2.22923	1.46148	0.609116	0.0006	0.0124324
ENSMUST00000056427	ENSMUSG00000058672	Tubb2a	chr13:34074300-34078008	13.8158	8.97333	0.622602	5e-05	0.00141417
ENSMUST00000022895	ENSMUSG00000022286	Grhl2	chr15:37231938-37363569	1.20784	0.678123	0.83281	0.00015	0.00378624
ENSMUST00000034244	ENSMUSG00000031791	Tmem38a	chr8:72572102-72587282	3.68799	2.5657	0.523485	0.0014	0.0250158
ENSMUST00000102976	ENSMUSG00000015619	Gata3	chr2:9857077-9890034	5.14452	2.93323	0.810545	5e-05	0.00141417
ENSMUST00000111994	ENSMUSG00000056234	Ncoa4	chr14:32159864-32179855	44.1833	20.6344	1.09845	5e-05	0.00141417
ENSMUST00000095063	ENSMUSG00000038544	Inip	chr4:59769636-59801589	1.78115	1.14934	0.632007	0.00195	0.0327838
ENSMUST00000114458	ENSMUSG00000035356	Nfkbiz	chr16:55811374-55838899	3.59903	1.85383	0.957097	5e-05	0.00141417
ENSMUST00000169612	ENSMUSG00000091811	Inafm1	chr7:16272013-16273692	4.85366	3.02021	0.684423	5e-05	0.00141417
ENSMUST00000043409	ENSMUSG00000039081	Zfp503	chr14:21983961-21989601	34.1341	26.8864	0.344336	0.002	0.0334664
ENSMUST00000081214	ENSMUSG00000058486	Wdr91	chr6:34880425-34910876	17.9929	11.5167	0.643707	5e-05	0.00141417
ENSMUST00000040320	ENSMUSG00000033039	Micall1	chr15:79108971-79141253	5.69674	4.10612	0.472362	5e-05	0.00141417
ENSMUST00000032194	ENSMUSG00000030103	Bhlhe40	chr6:108660628-108666925	33.3648	25.0561	0.413164	0.0004	0.00878381
ENSMUST00000081982	ENSMUSG00000037259	Dzank1	chr2:144470556-144527414	1.10231	0.790986	0.478811	0.0031	0.0474879
ENSMUST00000003561	ENSMUSG00000003469	Phyhip	chr14:70457475-70468832	1.67601	0.760501	1.14001	5e-05	0.00141417
ENSMUST00000101029	ENSMUSG00000037679	Inf2	chr12:112588783-112615556	2.14403	1.291	0.731832	5e-05	0.00141417
ENSMUST00000113314	ENSMUSG00000029273	Sult1d1	chr5:87554644-87569027	471.349	355.551	0.406737	0.00055	0.0115424
ENSMUST00000113310	ENSMUSG00000026819	Slc25a25	chr2:32414486-32456953	38.1782	11.9267	1.67855	5e-05	0.00141417
ENSMUST00000002360	ENSMUSG00000002289	Angptl4	chr17:33773749-33781575	26.02	6.97648	1.89905	5e-05	0.00141417
ENSMUST00000122222	ENSMUSG00000028977	Casz1	chr4:148804428-148954889	2.23205	1.14428	0.963933	5e-05	0.00141417
ENSMUST00000077066	ENSMUSG00000061451	Tmem151a	chr19:5071034-5085531	0.920828	0.408266	1.17342	5e-05	0.00141417
ENSMUST00000040828	ENSMUSG00000073421	H2-Ab1	chr17:34263208-34269418	37.104	11.5312	1.68604	5e-05	0.00141417
ENSMUST00000040820	ENSMUSG00000040147	Maob	chrX:16709281-16817366	3.82104	1.07947	1.82363	5e-05	0.00141417
ENSMUST00000004294	ENSMUSG00000004187	Kifc2	chr15:76660640-76668196	2.01238	1.27107	0.66286	0.0001	0.00265335
ENSMUST00000130422	ENSMUSG00000037012	Hk1	chr10:62268854-62379908	4.53292	2.34213	0.952619	0.00175	0.0300127
ENSMUST00000021793	ENSMUSG00000021364	Elovl2	chr13:41182494-41220405	9.28446	6.84515	0.439737	5e-05	0.00141417
ENSMUST00000032781	ENSMUSG00000030562	Nox4	chr7:87246095-87398710	307.483	235.068	0.387433	0.00165	0.0286638
ENSMUST00000030551	ENSMUSG00000028766	Alpl	chr4:137741732-137796384	269.131	149.852	0.844773	5e-05	0.00141417
ENSMUST00000102632	ENSMUSG00000068747	Sort1	chr3:108284081-108361511	5.18831	2.75593	0.912724	5e-05	0.00141417
ENSMUST00000031255	ENSMUSG00000029314	Agpat9	chr5:100840796-100899102	11.6014	6.80893	0.768795	5e-05	0.00141417
ENSMUST00000036691	ENSMUSG00000039262	Prrc2b	chr2:32151081-32236382	12.9904	8.18277	0.666789	0.0001	0.00265335
ENSMUST00000061273	ENSMUSG00000044548	Dact1	chr12:71309883-71321660	1.21253	0.452118	1.42324	5e-05	0.00141417
ENSMUST00000066723	ENSMUSG00000053964	Lgals4	chr7:28833853-28841708	3.96915	1.95575	1.02111	5e-05	0.00141417
ENSMUST00000068044	ENSMUSG00000022094	Slc39a14	chr14:70303468-70351425	8.38725	5.01764	0.741187	5e-05	0.00141417
ENSMUST00000045726	ENSMUSG00000040146	Rgl3	chr9:21971526-21989453	11.391	8.19169	0.475658	0.0001	0.00265335
ENSMUST00000042844	ENSMUSG00000041120	Nbl1	chr4:139082283-139092993	2.93271	1.93964	0.596451	0.00205	0.0341843
ENSMUST00000044443	ENSMUSG00000032826	Ank2	chr3:126921611-127499350	1.25017	0.667823	0.904586	0.00015	0.00378624
ENSMUST00000061071	ENSMUSG00000044667	Lppr4	chr3:117319138-117360876	0.759963	0.266945	1.50939	5e-05	0.00141417
ENSMUST00000124341	ENSMUSG00000006576	Slc4a3	chr1:75546265-75562172	0.983861	0.396992	1.30934	5e-05	0.00141417
ENSMUST00000035661	ENSMUSG00000032911	Cspg4	chr9:56865103-56899870	5.75979	3.60125	0.677519	5e-05	0.00141417
ENSMUST00000054865	ENSMUSG00000040473	Cfap69	chr5:5579277-5664239	2.87814	1.69143	0.766894	0.0002	0.00485099
ENSMUST00000069620	ENSMUSG00000055866	Per2	chr1:91415981-91459324	16.6224	7.17497	1.21208	5e-05	0.00141417
ENSMUST00000065014	ENSMUSG00000052911	Lamb2	chr9:108479735-108490530	8.22609	5.90603	0.478018	5e-05	0.00141417
ENSMUST00000146205	ENSMUSG00000075520	Malrd1	chr2:15526478-16255555	3.47322	2.02843	0.775915	5e-05	0.00141417
ENSMUST00000068237	ENSMUSG00000038342	Mlxip	chr5:123394797-123457932	4.94213	3.44348	0.521265	5e-05	0.00141417
ENSMUST00000055879	ENSMUSG00000044976	Wdr72	chr9:74110355-74283203	13.7684	10.954	0.329907	0.0025	0.0401043
ENSMUST00000092990	ENSMUSG00000029314	Agpat9	chr5:100840796-100899102	2.09313	0.456724	2.19627	0.0002	0.00485099
ENSMUST00000021346	ENSMUSG00000020963	Tshr	chr12:91400993-91540509	0.592276	0.223688	1.40478	5e-05	0.00141417
ENSMUST00000001920	ENSMUSG00000001864	Aif1l	chr2:31950138-31973442	57.5831	33.2478	0.792386	5e-05	0.00141417
ENSMUST00000029900	ENSMUSG00000028238	Atp6v0d2	chr4:19876840-19922605	13.4524	8.20096	0.713999	5e-05	0.00141417
ENSMUST00000174751	ENSMUSG00000036594	H2-Aa	chr17:34282743-34287827	36.4409	21.1233	0.786727	5e-05	0.00141417
ENSMUST00000043722	ENSMUSG00000033880	Lgals3bp	chr11:118392750-118402092	26.336	17.8885	0.558004	5e-05	0.00141417
ENSMUST00000023083	ENSMUSG00000061740	Cyp2d22	chr15:82370527-82380260	14.4924	5.60985	1.36927	5e-05	0.00141417
ENSMUST00000025019	ENSMUSG00000073433	Arhgdig	chr17:26199182-26201369	1.13944	0.189	2.59186	0.00025	0.00588258
ENSMUST00000034363	ENSMUSG00000031891	Hsd11b2	chr8:105518745-105523984	51.4434	25.3662	1.02008	5e-05	0.00141417
ENSMUST00000034369	ENSMUSG00000031897	Psmb10	chr8:105935727-105938392	13.5742	7.12195	0.930526	5e-05	0.00141417
ENSMUST00000121440	ENSMUSG00000061143	Maml3	chr3:51685906-52105076	1.95774	1.40069	0.483048	0.00145	0.0257185
ENSMUST00000110492	ENSMUSG00000050271	D8Ertd82e	chr8:36094827-36147787	4.51355	3.39928	0.409035	0.002	0.0334664
ENSMUST00000110494	ENSMUSG00000027202	Slc12a1	chr2:125152504-125230002	53.7887	25.3348	1.08618	5e-05	0.00141417
ENSMUST00000179619	ENSMUSG00000031785	Adgrg1	chr8:94977108-95014208	46.7595	28.2095	0.729079	5e-05	0.00141417
ENSMUST00000045035	ENSMUSG00000040564	Apoc1	chr7:19689483-19692658	6.85923	3.29623	1.05723	0.0011	0.020454
ENSMUST00000141158	ENSMUSG00000013033	Adgrl1	chr8:83900104-83955205	5.21906	2.41248	1.11328	5e-05	0.00141417
ENSMUST00000107950	ENSMUSG00000045411	2410002F23Rik	chr7:44246721-44257378	2.74993	1.47853	0.895232	0.00065	0.0133036
ENSMUST00000113054	ENSMUSG00000029381	Shroom3	chr5:92683434-92965318	4.6158	2.14571	1.10512	0.0001	0.00265335
ENSMUST00000053764	ENSMUSG00000044167	Foxo1	chr3:52268335-52353221	16.8389	9.90471	0.765613	5e-05	0.00141417
ENSMUST00000041029	ENSMUSG00000036867	Smad6	chr9:63953075-64022059	2.99756	2.15409	0.476711	0.00235	0.038101
ENSMUST00000006094	ENSMUSG00000022445	Cyp2d26	chr15:82790106-82794245	211.07	83.0725	1.34528	5e-05	0.00141417
ENSMUST00000159109	ENSMUSG00000040524	Zfp609	chr9:65692390-65827564	6.76976	5.29978	0.353174	0.00265	0.0420006
ENSMUST00000148891	ENSMUSG00000054728	Phactr1	chr13:42680622-43138526	2.40598	1.02917	1.22514	5e-05	0.00141417
ENSMUST00000084750	ENSMUSG00000040183	Ankrd6	chr4:32804034-32950841	6.48651	4.28669	0.597577	5e-05	0.00141417
ENSMUST00000171324	ENSMUSG00000091387	Gcnt4	chr13:96924688-96950912	0.939229	0.564306	0.734999	0.00045	0.009687
ENSMUST00000074043	ENSMUSG00000037465	Klf10	chr15:38294412-38300707	11.171	7.09576	0.654724	5e-05	0.00141417
ENSMUST00000001183	ENSMUSG00000001155	Ftcd	chr10:76575647-76589561	14.1444	9.85774	0.520902	5e-05	0.00141417
ENSMUST00000021271	ENSMUSG00000020893	Per1	chr11:69095216-69109960	16.9929	5.66886	1.58381	5e-05	0.00141417
ENSMUST00000021273	ENSMUSG00000020894	Vamp2	chr11:69088489-69092384	24.9578	16.0912	0.63322	5e-05	0.00141417
ENSMUST00000002765	ENSMUSG00000002688	Prkd1	chr12:50341230-50649223	2.63218	1.74608	0.592139	0.00025	0.00588258
ENSMUST00000038498	ENSMUSG00000037316	Bag4	chr8:25754508-25785209	13.0923	9.36591	0.483228	5e-05	0.00141417
ENSMUST00000023829	ENSMUSG00000023067	Cdkn1a	chr17:29090978-29100722	4.40698	1.10545	1.99516	5e-05	0.00141417
ENSMUST00000103164	ENSMUSG00000076435	Acsf2	chr11:94557101-94601871	11.7972	4.33319	1.44494	5e-05	0.00141417
ENSMUST00000032961	ENSMUSG00000030717	Nupr1	chr7:126623248-126625676	7.45218	4.91968	0.599099	0.00195	0.0327838
ENSMUST00000167679	ENSMUSG00000030223	Ptpro	chr6:137252333-137463233	4.11458	2.88594	0.511703	0.00265	0.0420006
ENSMUST00000048860	ENSMUSG00000039395	Mreg	chr1:72159441-72212307	3.13197	1.49857	1.06348	5e-05	0.00141417
ENSMUST00000000476	ENSMUSG00000029231	Pdgfra	chr5:75152291-75198215	3.90665	2.83538	0.462391	0.0012	0.0220581
ENSMUST00000045441	ENSMUSG00000033059	Pygb	chr2:150786734-150831758	7.15362	4.9187	0.540396	5e-05	0.00141417
ENSMUST00000124790	ENSMUSG00000079042	Apela	chr8:65028419-65037336	6.6648	4.50529	0.564943	0.0026	0.0414406
ENSMUST00000101126	ENSMUSG00000030029	Lrig1	chr6:94500330-94700145	5.31823	3.13575	0.762135	5e-05	0.00141417
ENSMUST00000024946	ENSMUSG00000024132	Eci1	chr17:24426682-24439316	111.02	86.6327	0.357839	0.0008	0.0157593
ENSMUST00000148584	ENSMUSG00000042371	Slc5a10	chr11:61653264-61720799	103.324	57.4476	0.846863	5e-05	0.00141417
ENSMUST00000069476	ENSMUSG00000055745	Ldoc1l	chr15:84553397-84557823	2.14168	0.945715	1.17927	5e-05	0.00141417
ENSMUST00000065112	ENSMUSG00000033453	Adamts15	chr9:30899154-30922452	3.6692	2.59079	0.502072	0.00015	0.00378624
ENSMUST00000167646	ENSMUSG00000002985	Apoe	chr7:19696108-19699166	56.1291	24.5695	1.19188	0.0016	0.0279374
ENSMUST00000111230	ENSMUSG00000026547	Tagln2	chr1:172500046-172507380	96.3858	49.0999	0.9731	5e-05	0.00141417
ENSMUST00000085677	ENSMUSG00000032327	Stra6	chr9:58028676-58153996	2.14325	0.959518	1.15942	0.00015	0.00378624
ENSMUST00000124226	ENSMUSG00000049804	Armcx4	chrX:134686518-134696757	0.975757	0.666713	0.549457	0.00055	0.0115424
ENSMUST00000018113	ENSMUSG00000017969	Ptgis	chr2:167103377-167240604	1.01655	0.358932	1.50189	0.0028	0.0438435
ENSMUST00000006128	ENSMUSG00000005973	Rcn1	chr2:105386290-105399319	5.30804	3.65599	0.537918	0.00025	0.00588258
ENSMUST00000071750	ENSMUSG00000032332	Col12a1	chr9:79598990-79718720	1.28019	0.741486	0.787869	5e-05	0.00141417
ENSMUST00000106532	ENSMUSG00000045775	Slc16a5	chr11:115462044-115474398	6.69001	3.32061	1.01056	5e-05	0.00141417
ENSMUST00000032263	ENSMUSG00000030160	Tmem52b	chr6:129512554-129519227	71.2524	49.357	0.529684	5e-05	0.00141417
ENSMUST00000055931	ENSMUSG00000047205	Dusp18	chr11:3895239-3901296	2.34002	1.53643	0.606937	0.0001	0.00265335
ENSMUST00000100023	ENSMUSG00000051065	Mb21d2	chr16:28826175-28929698	15.6262	9.75918	0.679133	5e-05	0.00141417
ENSMUST00000022467	ENSMUSG00000021908	Gm6768	chr12:119260933-119264272	0.414255	0.163066	1.34506	0.0002	0.00485099
ENSMUST00000049697	ENSMUSG00000050520	Cldn8	chr16:88560827-88563183	18.4639	13.4558	0.45648	0.00015	0.00378624
ENSMUST00000188073	ENSMUSG00000006542	Prkag3	chr1:74738921-74749221	6.9282	2.12813	1.7029	5e-05	0.00141417
ENSMUST00000165764	ENSMUSG00000006724	Cyp27b1	chr10:127048249-127052969	19.5585	2.59869	2.91194	5e-05	0.00141417
ENSMUST00000079300	ENSMUSG00000036885	Arhgef26	chr3:62338343-62462221	1.3519	0.859356	0.653656	0.00015	0.00378624
ENSMUST00000028252	ENSMUSG00000026888	Grb14	chr2:64912475-65022782	6.82869	4.838	0.497199	0.00225	0.0368149
ENSMUST00000003416	ENSMUSG00000048440	Cyp4f16	chr17:32536557-32551798	1.59353	0.743466	1.09989	0.0007	0.0141397
ENSMUST00000105525	ENSMUSG00000019986	Ahi1	chr10:20952546-21080428	4.0721	2.94857	0.465759	0.0001	0.00265335
ENSMUST00000038275	ENSMUSG00000038175	Mylip	chr13:45389741-45412019	22.6937	14.7094	0.625552	5e-05	0.00141417
ENSMUST00000170153	ENSMUSG00000046761	Fam83h	chr15:76001092-76035239	6.05131	4.66143	0.376474	0.00295	0.0455823
ENSMUST00000059562	ENSMUSG00000048332	Lhfp	chr3:53041527-53261679	5.33274	3.65815	0.543764	0.00055	0.0115424
ENSMUST00000072329	ENSMUSG00000057531	Dtnbp1	chr13:44922078-45002096	51.2713	40.6479	0.334972	0.0032	0.0487735
ENSMUST00000053536	ENSMUSG00000041598	Cdc42ep4	chr11:113726849-113751881	5.7905	3.76916	0.619445	0.00095	0.0182319
ENSMUST00000050226	ENSMUSG00000045667	Smtnl2	chr11:72389163-72411713	6.9726	4.1921	0.734024	5e-05	0.00141417
ENSMUST00000057243	ENSMUSG00000048572	Tmem252	chr19:24674007-24679661	25.0613	19.3486	0.37323	0.00105	0.019753
ENSMUST00000075558	ENSMUSG00000100210	Hist1h3f	chr13:23544464-23545312	16.5028	10.1535	0.700729	5e-05	0.00141417
ENSMUST00000084564	ENSMUSG00000045639	Zfp629	chr7:127607030-127615797	3.86871	2.71397	0.511449	0.00155	0.0272269
ENSMUST00000021957	ENSMUSG00000021495	Fam193b	chr13:55539318-55571120	5.55665	4.22113	0.396587	0.002	0.0334664
ENSMUST00000036991	ENSMUSG00000041548	Hspb8	chr5:116408490-116422864	2.40629	1.3332	0.851918	0.00015	0.00378624
ENSMUST00000170771	ENSMUSG00000019779	Frk	chr10:34483399-34611226	3.69349	1.9287	0.937353	0.00035	0.00785859
ENSMUST00000022639	ENSMUSG00000022055	Nefl	chr14:68082589-68124846	0.764366	0.197577	1.95185	5e-05	0.00141417
ENSMUST00000030464	ENSMUSG00000028698	Pik3r3	chr4:116221617-116303056	3.88691	2.72178	0.514074	0.00025	0.00588258
ENSMUST00000030465	ENSMUSG00000028699	Tspan1	chr4:116161868-116167601	9.82505	4.99937	0.974718	5e-05	0.00141417
ENSMUST00000030469	ENSMUSG00000028701	Lurap1	chr4:116132405-116159848	3.72154	1.91713	0.956956	5e-05	0.00141417
ENSMUST00000034903	ENSMUSG00000032348	Gsta4	chr9:78191965-78209348	38.5215	21.3971	0.848249	5e-05	0.00141417
ENSMUST00000034902	ENSMUSG00000057933	Gsta2	chr9:78331017-78355788	126.142	23.3226	2.43525	5e-05	0.00141417
ENSMUST00000015456	ENSMUSG00000015312	Gadd45b	chr10:80930090-80932204	1.34922	0.533094	1.33966	0.00015	0.00378624
ENSMUST00000000221	ENSMUSG00000000216	Scnn1g	chr7:121734478-121768475	15.4366	7.53455	1.03477	5e-05	0.00141417
ENSMUST00000087177	ENSMUSG00000067206	Lrrc66	chr5:73606641-73632526	3.47418	2.06259	0.752214	5e-05	0.00141417
ENSMUST00000042025	ENSMUSG00000033420	Antxr1	chr6:87133852-87335764	1.97868	1.0002	0.984258	5e-05	0.00141417
ENSMUST00000159692	ENSMUSG00000046324	Ermp1	chr19:29608213-29648415	9.32069	6.55626	0.507562	5e-05	0.00141417
ENSMUST00000042975	ENSMUSG00000034435	Tmem30b	chr12:73543113-73546395	5.00067	3.03718	0.719391	5e-05	0.00141417
ENSMUST00000042974	ENSMUSG00000035104	Eva1a	chr6:82041042-82093099	36.0897	28.5696	0.337108	0.00305	0.0468446
ENSMUST00000081435	ENSMUSG00000035929	H2-Q4	chr17:35379616-35384674	14.3455	10.7625	0.414579	0.00215	0.0355551
ENSMUST00000020926	ENSMUSG00000020607	Fam84a	chr12:14147598-14152038	2.58728	1.49931	0.787138	5e-05	0.00141417
ENSMUST00000101004	ENSMUSG00000020893	Per1	chr11:69095216-69109960	6.72051	2.16913	1.63146	5e-05	0.00141417
ENSMUST00000033751	ENSMUSG00000031380	Figf	chrX:164373377-164402650	2.73565	1.34111	1.02845	5e-05	0.00141417
ENSMUST00000033752	ENSMUSG00000019558	Slc6a8	chrX:73673149-73682502	57.2345	40.1811	0.510367	0.00105	0.019753
ENSMUST00000020217	ENSMUSG00000020029	Nudt4	chr10:95547006-95564167	139.815	102.275	0.451067	5e-05	0.00141417
ENSMUST00000029630	ENSMUSG00000028001	Fga	chr3:83026075-83033627	16.3822	8.53104	0.941334	5e-05	0.00141417
ENSMUST00000025196	ENSMUSG00000024338	Psmb8	chr17:34197720-34201454	11.5788	3.44275	1.74986	5e-05	0.00141417
ENSMUST00000025197	ENSMUSG00000024339	Tap2	chr17:34203526-34216321	5.63644	3.53894	0.671467	5e-05	0.00141417
ENSMUST00000031181	ENSMUSG00000029260	Ugt2b34	chr5:86889766-86906937	18.6271	12.126	0.619297	5e-05	0.00141417
ENSMUST00000030637	ENSMUSG00000028833	Ncdn	chr4:126743749-126753427	6.20788	4.28702	0.534127	0.00015	0.00378624
ENSMUST00000106072	ENSMUSG00000028799	Zfp362	chr4:128773087-128806045	6.92965	5.28616	0.390564	0.0028	0.0438435
ENSMUST00000036331	ENSMUSG00000035239	Neu3	chr7:99811438-99828417	0.91239	0.571727	0.674323	0.0029	0.0449794
ENSMUST00000110020	ENSMUSG00000021190	Lgmn	chr12:102394083-102439813	456.951	323.738	0.497212	0.001	0.0189868
ENSMUST00000117245	ENSMUSG00000026510	Trp53bp2	chr1:182409171-182462432	26.458	18.723	0.498891	5e-05	0.00141417
ENSMUST00000058804	ENSMUSG00000044676	Zfp612	chr8:110079763-110102753	4.09224	2.90361	0.495043	0.001	0.0189868
ENSMUST00000110689	ENSMUSG00000079105	C7	chr15:4988761-5063773	2.18394	1.39158	0.650212	0.0005	0.0106375
ENSMUST00000204146	ENSMUSG00000063415	Cyp26b1	chr6:84571413-84593908	1.35848	0.27399	2.30979	5e-05	0.00141417
ENSMUST00000000058	ENSMUSG00000000058	Cav2	chr6:17281184-17289115	18.9512	12.4101	0.610776	5e-05	0.00141417
ENSMUST00000047753	ENSMUSG00000040584	Abcb1a	chr5:8660076-8748575	3.47273	2.45801	0.49858	0.00035	0.00785859
ENSMUST00000029876	ENSMUSG00000028222	Calb1	chr4:15881263-15908064	189.468	42.7492	2.14799	5e-05	0.00141417
ENSMUST00000026698	ENSMUSG00000025608	Podxl	chr6:31519487-31563981	46.7055	36.3651	0.361035	0.00085	0.0165966
ENSMUST00000023465	ENSMUSG00000022779	Top3b	chr16:16870735-16892990	5.68422	3.24521	0.808648	0.0003	0.00690244
ENSMUST00000023468	ENSMUSG00000022783	Spag6	chr16:16753015-16829313	0.7254	0.310374	1.22477	0.0002	0.00485099
ENSMUST00000038422	ENSMUSG00000034168	Irf2bpl	chr12:86880702-86884814	10.1452	7.53447	0.429224	0.00025	0.00588258
ENSMUST00000022787	ENSMUSG00000022180	Slc7a8	chr14:54722215-54781886	75.4829	51.6229	0.548138	5e-05	0.00141417
ENSMUST00000068505	ENSMUSG00000026509	Capn2	chr1:182467259-182517524	22.8851	17.8967	0.354717	0.0016	0.0279374
ENSMUST00000025786	ENSMUSG00000024855	Pacs1	chr19:5133687-5273119	3.04144	2.18871	0.474674	0.0014	0.0250158
ENSMUST00000034215	ENSMUSG00000031765	Mt1	chr8:94179088-94180325	368.748	132.001	1.48208	5e-05	0.00141417
ENSMUST00000034214	ENSMUSG00000031762	Mt2	chr8:94172617-94173567	149.239	61.873	1.27025	5e-05	0.00141417
ENSMUST00000066778	ENSMUSG00000025178	Pi4k2a	chr19:42090434-42122218	14.7341	11.4983	0.357743	0.00135	0.0242813
ENSMUST00000146258	ENSMUSG00000028549	Itgb3bp	chr4:99765401-99829186	2.88713	2.02986	0.508254	0.00145	0.0257185
ENSMUST00000109554	ENSMUSG00000022390	Zc3h7b	chr15:81744847-81796269	31.6461	23.9304	0.403186	0.00025	0.00588258
ENSMUST00000041142	ENSMUSG00000042784	Muc1	chr3:89229056-89233381	3.41515	1.7501	0.96451	5e-05	0.00141417
ENSMUST00000060125	ENSMUSG00000046480	Scn4b	chr9:45138436-45154152	8.74579	5.50474	0.667913	5e-05	0.00141417
ENSMUST00000091789	ENSMUSG00000041607	Mbp	chr18:82475145-82585637	2.04098	1.24154	0.717125	5e-05	0.00141417
ENSMUST00000090785	ENSMUSG00000038495	Otud7b	chr3:96104526-96161129	2.32846	1.12102	1.05457	0.00165	0.0286638
ENSMUST00000166497	ENSMUSG00000025277	Abhd6	chr14:8002901-8056555	9.85436	6.52867	0.593973	5e-05	0.00141417
ENSMUST00000000939	ENSMUSG00000000915	Hip1r	chr5:123973627-124032270	8.84513	6.2384	0.503706	5e-05	0.00141417
ENSMUST00000116473	ENSMUSG00000031640	Klkb1	chr8:45269441-45294859	1.71427	0.852576	1.0077	5e-05	0.00141417
ENSMUST00000045855	ENSMUSG00000042770	Hebp1	chr6:135137521-135168215	37.9615	16.2608	1.22314	5e-05	0.00141417
ENSMUST00000032146	ENSMUSG00000030064	Frmd4b	chr6:97286866-97617541	18.0488	9.28651	0.958693	5e-05	0.00141417
ENSMUST00000087638	ENSMUSG00000053279	Aldh1a1	chr19:20601960-20643462	61.0642	30.5395	0.999651	5e-05	0.00141417
ENSMUST00000039177	ENSMUSG00000033308	Dpyd	chr3:118562128-119432924	54.5305	42.8697	0.347105	0.00135	0.0242813
ENSMUST00000109923	ENSMUSG00000034675	Dbn1	chr13:55473428-55488111	3.06216	1.79055	0.774146	0.00275	0.0432258
ENSMUST00000042194	ENSMUSG00000038260	Trpm4	chr7:45303154-45333780	1.22381	0.773255	0.662359	0.0006	0.0124324
ENSMUST00000080361	ENSMUSG00000054757	Akr1c20	chr13:4486971-4523344	1.81999	0.72365	1.33057	0.00035	0.00785859
ENSMUST00000026221	ENSMUSG00000025203	Scd2	chr19:44293675-44306864	18.631	10.3728	0.844901	5e-05	0.00141417
ENSMUST00000023050	ENSMUSG00000022414	Tab1	chr15:80133153-80161701	6.04494	4.47943	0.432413	0.0011	0.020454
ENSMUST00000058280	ENSMUSG00000036892	Prodh2	chr7:30493621-30513402	38.7082	17.3938	1.15406	5e-05	0.00141417
ENSMUST00000115349	ENSMUSG00000060459	Kng2	chr16:22985853-23029101	114.278	79.3712	0.525858	5e-05	0.00141417
ENSMUST00000025060	ENSMUSG00000024223	Armc12	chr17:28530859-28538954	1.63327	0.534652	1.61109	5e-05	0.00141417
ENSMUST00000065766	ENSMUSG00000046169	Adamts6	chr13:104287872-104494763	3.24857	1.995	0.703412	5e-05	0.00141417
ENSMUST00000112498	ENSMUSG00000024074	Crim1	chr17:78200247-78376592	20.0355	15.8629	0.336902	0.00245	0.0394568
ENSMUST00000167549	ENSMUSG00000037419	Endod1	chr9:14353989-14381242	4.75441	3.45623	0.460067	0.00045	0.009687
ENSMUST00000003061	ENSMUSG00000002980	Bcam	chr7:19756130-19771016	21.9654	14.8467	0.565091	5e-05	0.00141417
ENSMUST00000006749	ENSMUSG00000006574	Slc4a1	chr11:102348823-102365280	7.1203	2.99307	1.25031	5e-05	0.00141417
ENSMUST00000077918	ENSMUSG00000058952	Cfi	chr3:129835883-129875332	4.19039	2.30174	0.864361	5e-05	0.00141417
ENSMUST00000073115	ENSMUSG00000063689	Hist2h2ab	chr3:96219864-96220308	17.5395	11.1351	0.65549	0.00145	0.0257185
ENSMUST00000035288	ENSMUSG00000035459	Stab2	chr10:86841197-87008025	2.75161	1.53964	0.837688	5e-05	0.00141417
ENSMUST00000008684	ENSMUSG00000008540	Mgst1	chr6:138140315-138156755	56.806	31.9107	0.832004	5e-05	0.00141417
ENSMUST00000107032	ENSMUSG00000032875	Arhgef17	chr7:100869745-100932161	9.12904	5.89831	0.630161	5e-05	0.00141417
ENSMUST00000074519	ENSMUSG00000038393	Txnip	chr3:96557956-96561883	86.9614	38.3329	1.18179	5e-05	0.00141417
ENSMUST00000090379	ENSMUSG00000039701	Usp53	chr3:122931492-122984510	7.58758	5.63308	0.429716	0.0003	0.00690244
ENSMUST00000065512	ENSMUSG00000034930	Rtkn	chr6:83135462-83156397	10.8503	6.43916	0.752786	0.00055	0.0115424
ENSMUST00000093945	ENSMUSG00000039110	Mycbpap	chr11:94501346-94521742	0.723818	0.323588	1.16147	5e-05	0.00141417
ENSMUST00000046223	ENSMUSG00000041828	Abca8a	chr11:110025633-110095978	5.52988	3.14293	0.815141	5e-05	0.00141417
ENSMUST00000076859	ENSMUSG00000028680	Plk3	chr4:117126793-117133963	15.6326	2.77268	2.49521	5e-05	0.00141417
ENSMUST00000080797	ENSMUSG00000061048	Cdh3	chr8:106510912-106556908	1.40001	0.880097	0.669705	0.00045	0.009687
ENSMUST00000024708	ENSMUSG00000023915	Tnfrsf21	chr17:43016554-43089188	137.191	76.8565	0.835951	5e-05	0.00141417
ENSMUST00000039516	ENSMUSG00000035105	Egln3	chr12:54178980-54203860	8.84312	5.64441	0.647733	5e-05	0.00141417
ENSMUST00000065060	ENSMUSG00000020023	Tmcc3	chr10:94312023-94612084	10.9084	7.94375	0.457547	0.0001	0.00265335
ENSMUST00000036476	ENSMUSG00000040606	Kazn	chr4:142102389-142239401	6.03004	4.08947	0.560252	0.00115	0.0213015
ENSMUST00000070532	ENSMUSG00000028773	Fabp3	chr4:130308161-130359943	165.359	104.412	0.663319	5e-05	0.00141417
ENSMUST00000099575	ENSMUSG00000074934	Grem1	chr2:113746163-113758646	0.538978	0.0500239	3.42954	5e-05	0.00141417
ENSMUST00000091706	ENSMUSG00000006611	Hfe	chr13:23702033-23710854	11.1599	7.21951	0.628349	5e-05	0.00141417
ENSMUST00000099396	ENSMUSG00000054027	Nt5dc3	chr10:86779004-86838389	3.28295	1.91062	0.780952	5e-05	0.00141417
ENSMUST00000132517	ENSMUSG00000035722	Abca7	chr10:79996493-80015572	2.6464	1.70291	0.636028	0.0013	0.0235944
ENSMUST00000161576	ENSMUSG00000031770	Herpud1	chr8:94377920-94395377	235.775	140.762	0.74415	5e-05	0.00141417
ENSMUST00000022986	ENSMUSG00000022358	Fbxo32	chr15:58175878-58214892	0.793545	0.517978	0.615421	0.00075	0.0149651
ENSMUST00000109645	ENSMUSG00000048834	Vstm2a	chr11:16257723-16427310	2.03036	1.31858	0.622754	0.00055	0.0115424
ENSMUST00000030826	ENSMUSG00000028976	Slc2a5	chr4:150119282-150144169	51.2997	34.4449	0.57466	5e-05	0.00141417
ENSMUST00000023587	ENSMUSG00000022871	Fetub	chr16:22918381-22939766	0.524356	0.135617	1.95101	0.0011	0.020454
ENSMUST00000045503	ENSMUSG00000037754	Ppp1r16b	chr2:158665397-158766334	57.9427	42.3371	0.452704	5e-05	0.00141417
ENSMUST00000124470	ENSMUSG00000005268	Prlr	chr15:10177654-10349180	6.26001	3.1393	0.99572	5e-05	0.00141417
ENSMUST00000024005	ENSMUSG00000023236	Scg5	chr2:113776361-113829121	8.65323	2.90638	1.57401	5e-05	0.00141417
ENSMUST00000025356	ENSMUSG00000024479	Mal2	chr15:54571365-54602846	10.3335	7.0642	0.54873	5e-05	0.00141417
ENSMUST00000107456	ENSMUSG00000078670	Fam174b	chr7:73740301-73776919	1.94443	1.26267	0.622869	0.002	0.0334664
ENSMUST00000030121	ENSMUSG00000028413	B4galt1	chr4:40804601-40854005	25.4046	18.0974	0.489304	5e-05	0.00141417
ENSMUST00000048462	ENSMUSG00000026621	2019-03-01	chr1:184786766-184811313	1.81367	0.216718	3.06502	5e-05	0.00141417
ENSMUST00000006431	ENSMUSG00000006269	Atp6v1b1	chr6:83742989-83758855	40.3879	23.1359	0.803792	5e-05	0.00141417
ENSMUST00000090246	ENSMUSG00000050931	Sgms2	chr3:131318984-131490479	33.6775	25.7643	0.386412	0.0003	0.00690244
ENSMUST00000000291	ENSMUSG00000000282	Mnt	chr11:74830919-74845725	7.29206	5.04359	0.531878	5e-05	0.00141417
ENSMUST00000102972	ENSMUSG00000060981	Hist1h4h	chr13:23531049-23531522	372.095	286.01	0.379605	0.0006	0.0124324
ENSMUST00000029053	ENSMUSG00000027540	Ptpn1	chr2:167932326-167979385	15.0142	9.0606	0.72865	5e-05	0.00141417
ENSMUST00000022358	ENSMUSG00000021819	Zswim8	chr14:20707551-20723618	9.42102	7.43323	0.341893	0.00275	0.0432258
ENSMUST00000043056	ENSMUSG00000039653	Baat	chr4:49489421-49506557	1.70165	1.04741	0.700099	0.00165	0.0286638
ENSMUST00000043059	ENSMUSG00000038264	Sema7a	chr9:57940112-57962864	3.16409	2.01019	0.654462	5e-05	0.00141417
ENSMUST00000006825	ENSMUSG00000006649	Nphs1	chr7:30458314-30487223	6.3531	3.49	0.864232	5e-05	0.00141417
ENSMUST00000025234	ENSMUSG00000024376	Epb41l4a	chr18:33796326-34007206	2.01692	1.35822	0.570435	0.00035	0.00785859
ENSMUST00000057893	ENSMUSG00000050288	Fzd2	chr11:102604395-102608058	1.11381	0.626654	0.829756	0.0001	0.00265335
ENSMUST00000055947	ENSMUSG00000047181	Samd14	chr11:95009878-95026087	2.28885	1.33878	0.773706	5e-05	0.00141417
ENSMUST00000034508	ENSMUSG00000032010	Usp2	chr9:44066326-44113504	37.9936	22.6766	0.744554	5e-05	0.00141417
ENSMUST00000051803	ENSMUSG00000024885	Aldh3b1	chr19:3913492-3929761	7.69858	5.16592	0.575566	5e-05	0.00141417
ENSMUST00000076034	ENSMUSG00000059479	B3gnt8	chr7:25626653-25629492	1.36747	0.733247	0.899139	0.0012	0.0220581
ENSMUST00000094782	ENSMUSG00000028894	Inpp5b	chr4:124735729-124801511	42.3789	30.0392	0.496502	5e-05	0.00141417
ENSMUST00000110320	ENSMUSG00000042851	Zc3h6	chr2:128966592-129018563	3.10821	1.75497	0.824643	5e-05	0.00141417
ENSMUST00000006669	ENSMUSG00000006494	Pdk1	chr2:71873223-71903858	16.0324	5.72021	1.48686	5e-05	0.00141417
ENSMUST00000119336	ENSMUSG00000054708	Ankrd24	chr10:81628539-81647610	2.62051	1.74063	0.590236	0.00045	0.009687
ENSMUST00000001824	ENSMUSG00000001773	Folh1	chr7:86719351-86775864	152.006	84.8276	0.841523	5e-05	0.00141417
ENSMUST00000003468	ENSMUSG00000003378	Grik5	chr7:25009848-25072292	2.07542	1.47371	0.493945	0.00315	0.0481278
ENSMUST00000025439	ENSMUSG00000024556	Me2	chr18:73770039-73815392	3.1836	1.8212	0.805773	5e-05	0.00141417
ENSMUST00000102727	ENSMUSG00000018340	Anxa6	chr11:54979107-55033445	10.4062	6.09582	0.771552	0.0016	0.0279374
ENSMUST00000102721	ENSMUSG00000028544	Slc5a9	chr4:111875374-111902918	5.24839	3.53925	0.568432	0.0011	0.020454
ENSMUST00000067060	ENSMUSG00000054191	Klf1	chr8:84901927-84905295	2.94743	1.97822	0.575252	0.0033	0.0499537
ENSMUST00000039926	ENSMUSG00000037887	Dusp8	chr7:142079489-142095843	1.08888	0.622292	0.80718	5e-05	0.00141417
ENSMUST00000090433	ENSMUSG00000020823	Sec14l1	chr11:117115171-117159268	12.7208	6.30074	1.01359	5e-05	0.00141417
ENSMUST00000120664	ENSMUSG00000021699	Pde4d	chr13:108654176-109953461	7.31206	4.83398	0.597065	0.00035	0.00785859
ENSMUST00000000395	ENSMUSG00000000385	Tmprss2	chr16:97564683-97611195	40.7188	31.3644	0.376568	0.0006	0.0124324
ENSMUST00000041240	ENSMUSG00000041889	Shisa4	chr1:135371056-135375237	3.04368	1.72178	0.821914	5e-05	0.00141417
ENSMUST00000044730	ENSMUSG00000038437	Mllt6	chr11:97663413-97685463	15.9689	12.3398	0.37194	0.00135	0.0242813
ENSMUST00000023504	ENSMUSG00000022809	Nr1i2	chr16:38248322-38294824	2.44326	1.52347	0.681451	0.00015	0.00378624
ENSMUST00000027356	ENSMUSG00000026170	Cyp27a1	chr1:74713573-74737892	36.0545	27.0857	0.412646	0.0002	0.00485099
ENSMUST00000021903	ENSMUSG00000021453	Gadd45g	chr13:51846677-51848468	28.13	13.9059	1.01642	5e-05	0.00141417
ENSMUST00000021907	ENSMUSG00000021456	Fbp2	chr13:62836883-62858400	13.0738	9.44733	0.468696	0.0008	0.0157593
ENSMUST00000022595	ENSMUSG00000022018	Rgcc	chr14:79288755-79301645	27.179	12.3251	1.14089	5e-05	0.00141417
ENSMUST00000108334	ENSMUSG00000028207	Asph	chr4:9269316-9669344	13.1584	5.6132	1.22909	0.00025	0.00588258
ENSMUST00000170086	ENSMUSG00000037321	Tap1	chr17:34181987-34197225	3.91279	2.28948	0.773177	0.0001	0.00265335
ENSMUST00000069763	ENSMUSG00000047344	Lancl3	chrX:9199901-9268085	0.971451	0.645636	0.58942	0.0029	0.0449794
ENSMUST00000065461	ENSMUSG00000032010	Usp2	chr9:44066326-44113504	51.2134	31.7318	0.690593	5e-05	0.00141417
ENSMUST00000006828	ENSMUSG00000006651	Aplp1	chr7:30434980-30445582	2.91183	1.79302	0.699537	0.0001	0.00265335
ENSMUST00000045628	ENSMUSG00000035781	R3hdm4	chr10:79910052-79922273	28.7167	21.4391	0.42165	0.0004	0.00878381
ENSMUST00000025800	ENSMUSG00000024867	Pip5k1b	chr19:24294793-24555872	4.48496	2.8521	0.653072	0.0003	0.00690244
ENSMUST00000081440	ENSMUSG00000030340	Scnn1a	chr6:125320658-125344943	31.5608	11.6601	1.43655	5e-05	0.00141417
ENSMUST00000020971	ENSMUSG00000020642	Rnf144a	chr12:26306796-26415256	1.30338	0.626093	1.05781	0.00015	0.00378624
ENSMUST00000164056	ENSMUSG00000048897	Zfp710	chr7:80024813-80094173	2.84598	1.92602	0.5633	0.0028	0.0438435
ENSMUST00000023779	ENSMUSG00000023034	Nr4a1	chr15:101266845-101274792	3.41952	1.10933	1.6241	5e-05	0.00141417
ENSMUST00000021734	ENSMUSG00000021303	Gng4	chr13:13784328-13827897	0.666982	0.336477	0.987142	0.00025	0.00588258
ENSMUST00000144234	ENSMUSG00000001436	Slc19a1	chr10:77032240-77166548	42.6437	27.482	0.633846	0.0011	0.020454
ENSMUST00000022416	ENSMUSG00000021866	Anxa11	chr14:25842155-25886804	33.6436	24.9992	0.428448	5e-05	0.00141417
ENSMUST00000051558	ENSMUSG00000041235	Chd7	chr4:8690469-8867659	2.1447	1.36674	0.650037	0.0004	0.00878381
ENSMUST00000096040	ENSMUSG00000029830	Svopl	chr6:37983738-38046996	5.99228	2.65107	1.17653	5e-05	0.00141417
ENSMUST00000049074	ENSMUSG00000033295	Ptprf	chr4:118208212-118291405	44.7471	30.2332	0.565657	5e-05	0.00141417
ENSMUST00000098537	ENSMUSG00000074183	Gsta1	chr9:78230655-78242684	5.67799	0.477431	3.57202	5e-05	0.00141417
ENSMUST00000006378	ENSMUSG00000006216	Clcnkb	chr4:141398856-141416014	58.5329	30.0958	0.959685	5e-05	0.00141417
ENSMUST00000107698	ENSMUSG00000060317	Acnat2	chr4:49379839-49408151	23.7586	6.6029	1.84728	5e-05	0.00141417
ENSMUST00000105572	ENSMUSG00000078486	Perm1	chr4:156215867-156221307	1.15665	0.577231	1.00273	5e-05	0.00141417
ENSMUST00000111830	ENSMUSG00000027016	Zfp385b	chr2:77410633-77817259	2.61641	1.55449	0.751146	0.00035	0.00785859
ENSMUST00000034749	ENSMUSG00000032224	Fam81a	chr9:70089309-70142560	6.76821	4.23561	0.676206	5e-05	0.00141417
ENSMUST00000106685	ENSMUSG00000068762	Gstm6	chr3:107938846-107943749	1.17301	0.538848	1.12226	0.0012	0.0220581
ENSMUST00000113102	ENSMUSG00000029413	Naaa	chr5:92257658-92278170	3.87435	2.46825	0.650465	0.00025	0.00588258
ENSMUST00000050916	ENSMUSG00000032733	Snx33	chr9:56917199-56928371	4.6456	3.54591	0.389707	0.00265	0.0420006
ENSMUST00000171470	ENSMUSG00000024529	Lox	chr18:52516068-52529867	0.382648	0.137978	1.47158	0.0003	0.00690244
ENSMUST00000028499	ENSMUSG00000027087	Itgav	chr2:83724396-83806916	54.7212	43.287	0.338168	0.003	0.0461893
ENSMUST00000039309	ENSMUSG00000039364	Sectm1b	chr11:121053457-121063569	30.443	16.2113	0.909109	5e-05	0.00141417
ENSMUST00000079413	ENSMUSG00000024222	Fkbp5	chr17:28399094-28517524	64.3451	18.4589	1.80151	5e-05	0.00141417
ENSMUST00000052236	ENSMUSG00000048232	Fbxo10	chr4:45018582-45084604	8.53842	6.15322	0.472627	0.00045	0.009687
ENSMUST00000029451	ENSMUSG00000027858	Tspan2	chr3:102734528-102801513	2.51614	1.24446	1.01569	5e-05	0.00141417
ENSMUST00000025778	ENSMUSG00000024827	Gldc	chr19:30098448-30175418	119.817	28.6651	2.06346	5e-05	0.00141417
ENSMUST00000031055	ENSMUSG00000029163	Emilin1	chr5:30913401-30921277	6.32065	4.42993	0.512788	0.0001	0.00265335
ENSMUST00000031058	ENSMUSG00000029166	Mapre3	chr5:30814640-30866106	4.41356	2.54889	0.792072	0.0032	0.0487735
ENSMUST00000034267	ENSMUSG00000031808	Slc27a1	chr8:71568926-71586708	10.4622	5.73526	0.867254	5e-05	0.00141417
ENSMUST00000041138	ENSMUSG00000036941	Elac1	chr18:73735037-73754479	2.7118	1.96695	0.463292	0.0018	0.0306903
ENSMUST00000111978	ENSMUSG00000061288	Taok3	chr5:117120128-117275219	6.2923	4.65872	0.433653	0.0023	0.0374907
ENSMUST00000114474	ENSMUSG00000032068	Plet1	chr9:50494524-50505482	7.3541	4.77827	0.622061	0.0001	0.00265335
ENSMUST00000110204	ENSMUSG00000021255	Esrrb	chr12:86361116-86521628	3.73803	1.65924	1.17176	5e-05	0.00141417
ENSMUST00000042771	ENSMUSG00000035673	Sbno2	chr10:80057415-80102698	4.32318	3.11183	0.474333	0.00015	0.00378624
ENSMUST00000081232	ENSMUSG00000034330	Plcg2	chr8:117498290-117635140	3.88735	2.78436	0.481441	0.00025	0.00588258
ENSMUST00000032179	ENSMUSG00000030091	Nup210	chr6:91013067-91116829	5.6156	4.07502	0.462631	0.00015	0.00378624
ENSMUST00000032172	ENSMUSG00000030086	Chchd6	chr6:89383145-89595652	17.582	13.1484	0.419211	0.002	0.0334664
ENSMUST00000032177	ENSMUSG00000030089	Slc41a3	chr6:90604724-90646412	1.42239	0.414481	1.77893	5e-05	0.00141417
ENSMUST00000126865	ENSMUSG00000034135	Sik3	chr9:46012819-46224194	20.1594	14.1784	0.507755	5e-05	0.00141417
ENSMUST00000161807	ENSMUSG00000079197	Psme2	chr14:55587440-55591113	50.4255	38.8323	0.376896	0.00285	0.0444141
ENSMUST00000028129	ENSMUSG00000026791	Slc2a8	chr2:32972989-32982082	6.32154	4.15511	0.605389	0.0002	0.00485099
ENSMUST00000034467	ENSMUSG00000031986	Sprtn	chr8:124897885-124903813	5.81526	4.26454	0.447453	0.00165	0.0286638
ENSMUST00000026210	ENSMUSG00000025196	Cpn1	chr19:43956306-43986556	55.9784	33.7872	0.728391	5e-05	0.00141417
ENSMUST00000060531	ENSMUSG00000046079	Lrrc8d	chr5:105699968-105815215	19.4597	11.877	0.712322	0.00045	0.009687
ENSMUST00000063750	ENSMUSG00000017491	Rarb	chr14:16430841-16575472	6.00923	4.53348	0.40656	0.00235	0.038101
ENSMUST00000109267	ENSMUSG00000021754	Map3k1	chr13:111746427-111808993	10.9059	8.55112	0.350921	0.00175	0.0300127
ENSMUST00000046351	ENSMUSG00000036957	Lrfn3	chr7:30355513-30362772	1.02891	0.559992	0.877643	0.00035	0.00785859
ENSMUST00000110438	ENSMUSG00000022270	Fam134b	chr15:25843263-25973687	32.3156	14.5803	1.14821	0.0017	0.0293704
ENSMUST00000026050	ENSMUSG00000025068	Gsto1	chr19:47854969-47864790	47.4034	19.2563	1.29966	5e-05	0.00141417
ENSMUST00000082136	ENSMUSG00000059436	Max	chr12:76937268-76962248	14.4216	10.5524	0.450657	0.00245	0.0394568
ENSMUST00000030948	ENSMUSG00000029071	Dvl1	chr4:155847401-155863362	21.0285	14.8236	0.504444	5e-05	0.00141417
ENSMUST00000086723	ENSMUSG00000024085	Man2a1	chr17:64600735-64755110	46.841	30.5544	0.616394	5e-05	0.00141417
ENSMUST00000001592	ENSMUSG00000001552	Jup	chr11:100370618-100397749	42.0842	31.3666	0.424049	5e-05	0.00141417
ENSMUST00000024894	ENSMUSG00000024087	Cyp1b1	chr17:79706952-79715041	5.99549	3.87914	0.62814	5e-05	0.00141417
ENSMUST00000182161	ENSMUSG00000098188	Sowahc	chr10:59221952-59226434	4.97753	3.68864	0.432343	0.001	0.0189868
ENSMUST00000037502	ENSMUSG00000038893	Fam117a	chr11:95337017-95381872	2.532	1.68835	0.584658	0.00085	0.0165966
ENSMUST00000062638	ENSMUSG00000051728	4930563D23Rik	chr16:92318762-92321441	0.434593	0.205248	1.0823	0.0018	0.0306903
ENSMUST00000056136	ENSMUSG00000044708	Kcnj10	chr1:172341209-172374085	15.8571	8.12876	0.964021	5e-05	0.00141417
ENSMUST00000053456	ENSMUSG00000050379	2019-09-06	chrX:36911325-36991794	1.1521	0.702444	0.713808	0.00055	0.0115424
ENSMUST00000065543	ENSMUSG00000029154	Cwh43	chr5:73406074-73453435	3.87469	1.2909	1.58571	5e-05	0.00141417
ENSMUST00000042286	ENSMUSG00000055805	Fmnl1	chr11:103171106-103198901	26.4746	20.0975	0.39759	0.0003	0.00690244
ENSMUST00000089332	ENSMUSG00000068196	Col8a1	chr16:57624257-57754737	2.91111	1.49635	0.960124	5e-05	0.00141417
ENSMUST00000031973	ENSMUSG00000029913	Prdm5	chr6:65768543-65936376	3.61666	1.51875	1.25177	0.0001	0.00265335
ENSMUST00000031976	ENSMUSG00000029913	Prdm5	chr6:65768543-65936376	5.29366	3.29009	0.686136	0.0005	0.0106375
ENSMUST00000070642	ENSMUSG00000056501	Cebpb	chr2:167688914-167690418	24.8778	8.76555	1.50494	5e-05	0.00141417
ENSMUST00000023435	ENSMUSG00000022754	Tmem45a	chr16:56805160-56886166	0.430575	0.173891	1.30808	0.0008	0.0157593
ENSMUST00000072646	ENSMUSG00000021280	Exoc3l4	chr12:111417429-111431182	2.50576	1.63332	0.617444	0.00065	0.0133036
ENSMUST00000058196	ENSMUSG00000021384	Susd3	chr13:49230689-49248706	60.1667	33.7345	0.834743	5e-05	0.00141417
ENSMUST00000001253	ENSMUSG00000020651	Slc26a4	chr12:31519826-31559969	22.4419	13.5372	0.729264	5e-05	0.00141417
ENSMUST00000039388	ENSMUSG00000034936	Arl4d	chr11:101665540-101667832	8.05253	4.28061	0.911625	5e-05	0.00141417
ENSMUST00000105321	ENSMUSG00000055053	Nfic	chr10:81396185-81431005	25.1559	19.0108	0.404078	0.00255	0.0407945
ENSMUST00000038475	ENSMUSG00000033579	Fa2h	chr8:111345140-111393824	1.46611	0.833742	0.814325	0.00025	0.00588258
ENSMUST00000017821	ENSMUSG00000017677	Wsb1	chr11:79239371-79254671	21.2894	8.87767	1.26188	5e-05	0.00141417
ENSMUST00000025482	ENSMUSG00000039529	Atp8b1	chr18:64528978-64661000	2.31799	1.62101	0.515985	0.0002	0.00485099
ENSMUST00000020886	ENSMUSG00000020572	Nampt	chr12:32820334-32853369	71.8176	50.5436	0.506809	5e-05	0.00141417
ENSMUST00000069604	ENSMUSG00000029009	Mthfr	chr4:148039076-148059551	5.17427	3.82025	0.437689	0.00045	0.009687
ENSMUST00000114964	ENSMUSG00000061751	Kalrn	chr16:33974257-34573532	5.57167	3.32849	0.743242	0.0005	0.0106375
ENSMUST00000190196	ENSMUSG00000073600	Prob1	chr18:35650350-35655238	7.77187	5.85387	0.408872	0.0005	0.0106375
ENSMUST00000135383	ENSMUSG00000033857	Engase	chr11:118476828-118489209	1.368	0.844476	0.695945	0.00065	0.0133036
ENSMUST00000091288	ENSMUSG00000079037	Prnp	chr2:131909927-131956130	118.777	86.1639	0.463104	5e-05	0.00141417
ENSMUST00000111915	ENSMUSG00000030207	Fam234b	chr6:135197976-135254351	2.30308	1.36173	0.758128	5e-05	0.00141417
ENSMUST00000000329	ENSMUSG00000000320	Alox12	chr11:70241456-70255353	2.65532	1.53958	0.786352	5e-05	0.00141417
ENSMUST00000075836	ENSMUSG00000028556	Dock7	chr4:98936670-99120915	1.23658	0.36794	1.74881	0.00045	0.009687
ENSMUST00000019386	ENSMUSG00000005251	Ripk4	chr16:97741932-97763737	9.13336	6.29606	0.536695	5e-05	0.00141417
ENSMUST00000051401	ENSMUSG00000047501	Cldn4	chr5:134945118-134946934	3.98937	2.44307	0.707465	5e-05	0.00141417
ENSMUST00000041475	ENSMUSG00000048612	Myof	chr19:37899035-38043577	8.39559	4.63723	0.856369	5e-05	0.00141417
ENSMUST00000038677	ENSMUSG00000035049	Rrp12	chr19:41862851-41896153	2.85629	1.59684	0.838918	5e-05	0.00141417
ENSMUST00000042121	ENSMUSG00000037649	H2-DMa	chr17:34135181-34139101	12.0005	4.23287	1.50339	5e-05	0.00141417
ENSMUST00000022048	ENSMUSG00000021565	Slc6a19	chr13:73679744-73709850	226.688	175.499	0.369243	0.0028	0.0438435
ENSMUST00000013262	ENSMUSG00000020472	Zkscan17	chr11:59485519-59511073	6.68014	5.03705	0.407299	0.003	0.0461893
ENSMUST00000023601	ENSMUSG00000022885	St6gal1	chr16:23220655-23360350	2.47143	1.53326	0.688744	0.0008	0.0157593
ENSMUST00000021603	ENSMUSG00000021186	Fbln5	chr12:101746564-101819055	11.8942	9.26524	0.360353	0.00165	0.0286638
ENSMUST00000058785	ENSMUSG00000066072	Cyp4a10	chr4:115518263-115533649	181.366	85.1213	1.09131	5e-05	0.00141417
ENSMUST00000059787	ENSMUSG00000044393	Dsg2	chr18:20558073-20674324	5.05039	3.43606	0.55564	5e-05	0.00141417
ENSMUST00000062213	ENSMUSG00000025212	Sfxn3	chr19:45047575-45056383	5.48787	3.29688	0.735147	5e-05	0.00141417
ENSMUST00000056028	ENSMUSG00000042978	Sbk1	chr7:126272618-126295016	23.0364	16.314	0.497804	5e-05	0.00141417
ENSMUST00000025036	ENSMUSG00000024201	Kdm4b	chr17:56326061-56402870	4.98019	2.98386	0.739021	0.0003	0.00690244
ENSMUST00000152782	ENSMUSG00000075254	Heg1	chr16:33684465-33787112	7.48266	5.25039	0.511128	0.0003	0.00690244
ENSMUST00000031398	ENSMUSG00000029445	Hpd	chr5:123171806-123182727	173.305	80.3668	1.10864	5e-05	0.00141417
ENSMUST00000031390	ENSMUSG00000029436	Mmp17	chr5:129584168-129611099	0.44318	0.271238	0.708336	0.00175	0.0300127
ENSMUST00000107409	ENSMUSG00000030605	Mfge8	chr7:79133767-79149060	22.2356	13.3022	0.741203	5e-05	0.00141417
ENSMUST00000043503	ENSMUSG00000038677	Scube3	chr17:28142315-28174852	1.55809	0.960729	0.697578	5e-05	0.00141417
ENSMUST00000018614	ENSMUSG00000018470	Kcnab3	chr11:69326257-69333042	0.391305	0.146134	1.421	0.0005	0.0106375
ENSMUST00000163588	ENSMUSG00000033855	Ston1	chr17:88597683-88662586	8.56299	5.32416	0.68556	5e-05	0.00141417
ENSMUST00000045903	ENSMUSG00000032536	Trak1	chr9:121366957-121474916	25.7395	14.9825	0.780708	5e-05	0.00141417
ENSMUST00000074359	ENSMUSG00000066512	Klk1b5	chr7:44215944-44220703	1.55625	0.563727	1.46501	5e-05	0.00141417
ENSMUST00000077196	ENSMUSG00000037185	Krt80	chr15:101349570-101370125	2.28866	0.995697	1.20072	5e-05	0.00141417
ENSMUST00000079041	ENSMUSG00000060181	Slc35e3	chr10:117733678-117746358	29.0638	23.1381	0.328953	0.00265	0.0420006
ENSMUST00000106337	ENSMUSG00000027983	Cyp2u1	chr3:131288440-131316661	2.37781	1.50675	0.658197	0.0002	0.00485099
ENSMUST00000139526	ENSMUSG00000021830	Txndc16	chr14:45134447-45281230	7.37436	5.18658	0.507734	0.0003	0.00690244
ENSMUST00000101642	ENSMUSG00000020451	Limk2	chr11:3344255-3409174	2.5408	1.46641	0.792987	0.00085	0.0165966
ENSMUST00000038945	ENSMUSG00000041801	Phlda3	chr1:135766118-135769136	1.79225	0.912665	0.973617	0.0002	0.00485099
ENSMUST00000038942	ENSMUSG00000042613	Pbxip1	chr3:89436705-89450952	15.6792	10.0472	0.642055	5e-05	0.00141417
ENSMUST00000006614	ENSMUSG00000006445	Epha2	chr4:141301239-141329384	3.44673	1.79357	0.942393	5e-05	0.00141417
ENSMUST00000020767	ENSMUSG00000020474	Polm	chr11:5827859-5838016	1.33671	0.840786	0.668878	0.0012	0.0220581
ENSMUST00000165559	ENSMUSG00000052928	Ctif	chr18:75431223-75697696	3.62959	2.50168	0.536907	5e-05	0.00141417
ENSMUST00000020692	ENSMUSG00000020423	Btg2	chr1:134075169-134079120	7.26358	3.87728	0.905637	5e-05	0.00141417
ENSMUST00000073957	ENSMUSG00000063531	Sema3e	chr5:14025275-14256689	1.07172	0.734498	0.545092	0.00105	0.019753
ENSMUST00000025403	ENSMUSG00000024525	Impa2	chr18:67289252-67319146	4.05768	2.23443	0.860745	5e-05	0.00141417
ENSMUST00000023803	ENSMUSG00000023043	Krt18	chr15:102028215-102032026	8.40688	5.66272	0.570076	0.00045	0.009687
ENSMUST00000102715	ENSMUSG00000027030	Stk39	chr2:68210444-68472268	9.43238	6.90587	0.449798	0.00025	0.00588258
ENSMUST00000193932	ENSMUSG00000010064	Slc38a3	chr9:107650633-107669530	13.0598	8.74685	0.578301	5e-05	0.00141417
ENSMUST00000067048	ENSMUSG00000022262	Dnah5	chr15:28203751-28472045	0.453614	0.284119	0.674968	0.00015	0.00378624
ENSMUST00000019076	ENSMUSG00000018932	Map2k3	chr11:60932032-60952811	21.0996	16.2991	0.372418	0.00125	0.0228388
ENSMUST00000094898	ENSMUSG00000070871	Ccnyl1	chr1:64679870-64725644	7.09741	5.12978	0.468395	0.0025	0.0401043
ENSMUST00000077257	ENSMUSG00000015846	Rxra	chr2:27676439-27762957	37.8276	29.8587	0.341287	0.00165	0.0286638
ENSMUST00000025645	ENSMUSG00000024736	Tmem132a	chr19:10842543-10869940	1.51614	0.659481	1.201	5e-05	0.00141417
ENSMUST00000019896	ENSMUSG00000019762	Iyd	chr10:3540239-3554877	59.7397	46.9157	0.348621	0.00175	0.0300127
ENSMUST00000005860	ENSMUSG00000005716	Pvalb	chr15:78191113-78206400	74.3961	41.9547	0.826393	5e-05	0.00141417
ENSMUST00000084501	ENSMUSG00000028370	Pappa	chr4:65124173-65357509	1.74831	0.755577	1.21031	5e-05	0.00141417
ENSMUST00000040971	ENSMUSG00000035547	Capn5	chr7:98121558-98179401	1.86191	1.14833	0.697244	0.0001	0.00265335
ENSMUST00000027302	ENSMUSG00000026126	Ptpn18	chr1:34459764-34475733	2.64847	1.65554	0.677864	0.00275	0.0432258
ENSMUST00000033765	ENSMUSG00000031390	Avpr2	chrX:73891441-73911336	4.19793	2.13446	0.975805	5e-05	0.00141417
ENSMUST00000028689	ENSMUSG00000027253	Lrp4	chr2:91457510-91513779	8.10909	5.90315	0.458054	5e-05	0.00141417
ENSMUST00000137724	ENSMUSG00000029016	Clcn6	chr4:148004258-148038821	5.49098	4.06498	0.433816	0.0013	0.0235944
ENSMUST00000031314	ENSMUSG00000029368	Alb	chr5:90460896-90476602	9.43344	4.96122	0.927087	5e-05	0.00141417
ENSMUST00000171887	ENSMUSG00000104445	Rhbg	chr3:88242873-88296999	15.1405	6.11884	1.30708	5e-05	0.00141417
ENSMUST00000107482	ENSMUSG00000041237	Pklr	chr3:89136141-89160196	12.2806	4.41158	1.47702	5e-05	0.00141417
ENSMUST00000106280	ENSMUSG00000064141	Zfp69	chr4:120930136-120951699	2.47027	1.56683	0.656816	0.0003	0.00690244
ENSMUST00000106758	ENSMUSG00000028621	Cyb5rl	chr4:107066987-107087777	4.38389	2.54603	0.783963	0.00015	0.00378624
ENSMUST00000053273	ENSMUSG00000030287	Itpr2	chr6:146108298-146502178	9.32059	6.66722	0.483337	0.0018	0.0306903
ENSMUST00000117507	ENSMUSG00000028108	Ecm1	chr3:95734146-95739569	15.5256	10.4012	0.577902	0.0001	0.00265335
ENSMUST00000018698	ENSMUSG00000018554	Ybx2	chr11:69935795-69941605	3.85646	1.37104	1.492	5e-05	0.00141417
ENSMUST00000034600	ENSMUSG00000032092	Mpzl2	chr9:45042424-45054015	10.0707	3.8465	1.38855	5e-05	0.00141417
ENSMUST00000112712	ENSMUSG00000050447	Lypd6	chr2:50066428-50193569	2.03831	1.34967	0.594774	0.0016	0.0279374
ENSMUST00000077775	ENSMUSG00000037005	Xpnpep2	chrX:48108724-48136981	3.52903	1.72482	1.03282	5e-05	0.00141417
ENSMUST00000020982	ENSMUSG00000020653	Klf11	chr12:24651370-24662774	4.96896	2.47606	1.0049	5e-05	0.00141417
ENSMUST00000037947	ENSMUSG00000038612	Mcl1	chr3:95658787-95663176	56.4541	43.4286	0.378435	0.00065	0.0133036
ENSMUST00000019999	ENSMUSG00000019852	Arfgef3	chr10:18588010-18743758	0.894403	0.617966	0.533398	0.0014	0.0250158
ENSMUST00000167149	ENSMUSG00000038615	Nfe2l1	chr11:96817413-96829968	23.8116	15.6376	0.606647	0.00105	0.019753
ENSMUST00000090398	ENSMUSG00000021782	Dlg5	chr14:24133952-24245920	6.20534	4.23265	0.55195	5e-05	0.00141417
ENSMUST00000111026	ENSMUSG00000041644	Slc5a12	chr2:110597297-110647779	270.21	185.206	0.544949	5e-05	0.00141417
ENSMUST00000018713	ENSMUSG00000018569	Cldn7	chr11:69964778-69967885	6.11457	3.28123	0.898014	5e-05	0.00141417
ENSMUST00000018710	ENSMUSG00000018566	Slc2a4	chr11:69942542-69948188	7.48609	3.27158	1.19422	5e-05	0.00141417
ENSMUST00000001122	ENSMUSG00000001095	Slc13a2	chr11:78394484-78422217	30.4522	16.9487	0.845367	5e-05	0.00141417
ENSMUST00000039659	ENSMUSG00000051483	Cbr1	chr16:93607836-93610505	39.0622	23.8704	0.710551	5e-05	0.00141417
ENSMUST00000100322	ENSMUSG00000075478	Slitrk1	chr14:108909990-108914239	0.391304	0.164502	1.25018	0.00025	0.00588258
ENSMUST00000075162	ENSMUSG00000063903	Klk1	chr7:44225359-44229618	1510.34	1006.09	0.586107	5e-05	0.00141417
ENSMUST00000197040	ENSMUSG00000028150	Rorc	chr3:94372793-94404501	9.82106	4.51887	1.11992	5e-05	0.00141417
ENSMUST00000094814	ENSMUSG00000070803	Cited4	chr4:120666571-120667820	4.19348	1.42006	1.56219	5e-05	0.00141417
ENSMUST00000119823	ENSMUSG00000074179	Gm10639	chr9:78289922-78305525	14.2494	2.26095	2.6559	5e-05	0.00141417
ENSMUST00000065080	ENSMUSG00000032120	C2cd2l	chr9:44309236-44320282	27.8789	22.245	0.325692	0.0033	0.0499537
ENSMUST00000065086	ENSMUSG00000052957	Gas1	chr13:60174404-60177365	12.8288	9.17874	0.483016	5e-05	0.00141417
ENSMUST00000153128	ENSMUSG00000037408	Cnnm4	chr1:36471619-36508764	5.14936	3.17423	0.697989	5e-05	0.00141417
ENSMUST00000161804	ENSMUSG00000029673	Auts2	chr5:131437787-131616605	8.06353	4.24494	0.925667	5e-05	0.00141417
ENSMUST00000108492	ENSMUSG00000004328	Hif3a	chr7:17031506-17062427	1.24907	0.231808	2.42985	5e-05	0.00141417
ENSMUST00000091233	ENSMUSG00000036040	Adamtsl2	chr2:27079378-27108981	4.88523	2.12676	1.19977	5e-05	0.00141417
ENSMUST00000163499	ENSMUSG00000022119	Rbm26	chr14:105106750-105177327	5.00668	2.8377	0.819131	0.0029	0.0449794
ENSMUST00000169627	ENSMUSG00000037003	Tns2	chr15:102102987-102116401	22.1791	14.9114	0.572785	5e-05	0.00141417
ENSMUST00000042744	ENSMUSG00000040998	Npnt	chr3:132881744-132950291	30.1414	16.6257	0.858335	5e-05	0.00141417
ENSMUST00000042740	ENSMUSG00000004668	Abca13	chr11:9191941-9684259	54.9922	36.1261	0.606187	5e-05	0.00141417
ENSMUST00000023570	ENSMUSG00000022863	Btg3	chr16:78359859-78377192	5.52789	3.75344	0.558516	0.0033	0.0499537
ENSMUST00000095806	ENSMUSG00000071369	Map3k5	chr10:19934471-20142753	17.0248	11.5902	0.554731	0.00015	0.00378624
ENSMUST00000121927	ENSMUSG00000048490	Nrip1	chr16:76287399-76373827	11.5423	8.80464	0.390598	0.00245	0.0394568
ENSMUST00000038824	ENSMUSG00000038567	Cyp24a1	chr2:170482707-170519123	50.5413	10.8527	2.21941	5e-05	0.00141417
ENSMUST00000028177	ENSMUSG00000026833	Olfm1	chr2:28192991-28230736	3.91256	2.35623	0.73163	0.00015	0.00378624
ENSMUST00000039197	ENSMUSG00000039865	Slc44a3	chr3:121459527-121532404	3.53112	2.03308	0.796461	5e-05	0.00141417
ENSMUST00000063816	ENSMUSG00000052117	D630039A03Rik	chr4:57908482-57916297	7.48521	4.28317	0.805364	5e-05	0.00141417
ENSMUST00000113585	ENSMUSG00000033174	Mgll	chr6:88724411-88828360	10.5884	5.97979	0.824312	5e-05	0.00141417
ENSMUST00000067124	ENSMUSG00000020593	Lpin1	chr12:16535668-16589770	17.6472	10.5495	0.742268	5e-05	0.00141417
ENSMUST00000056089	ENSMUSG00000050777	Tmem37	chr1:120067376-120074074	34.2517	20.7208	0.725097	5e-05	0.00141417
ENSMUST00000026211	ENSMUSG00000025197	Cyp2c44	chr19:44005021-44029247	38.2003	28.0783	0.444132	5e-05	0.00141417
ENSMUST00000049908	ENSMUSG00000070003	Ssbp4	chr8:70597490-70608314	8.72835	5.5808	0.645238	0.0001	0.00265335
ENSMUST00000068150	ENSMUSG00000020926	Adam11	chr11:102761438-102780262	1.56746	1.088	0.526752	0.0018	0.0306903
ENSMUST00000043314	ENSMUSG00000040703	Cyp2s1	chr7:25802474-25816913	5.46197	3.42739	0.672312	5e-05	0.00141417
ENSMUST00000136175	ENSMUSG00000084883	Ccdc85c	chr12:108206344-108275417	12.1887	8.22988	0.566598	0.0001	0.00265335
ENSMUST00000034060	ENSMUSG00000031642	Sh3rf1	chr8:61224170-61396072	17.2583	11.8174	0.546375	5e-05	0.00141417
ENSMUST00000099691	ENSMUSG00000037012	Hk1	chr10:62268854-62379908	10.6539	5.50061	0.953721	5e-05	0.00141417
ENSMUST00000114246	ENSMUSG00000041075	Fzd7	chr1:59482423-59486955	5.73394	4.02519	0.510469	0.0002	0.00485099
ENSMUST00000051241	ENSMUSG00000044786	Zfp36	chr7:28376783-28379255	33.5301	17.0178	0.978408	5e-05	0.00141417
ENSMUST00000120339	ENSMUSG00000041605	5730559C18Rik	chr1:136213530-136234264	2.74322	1.66391	0.721292	5e-05	0.00141417
ENSMUST00000038169	ENSMUSG00000033307	Mif	chr10:75859352-75860250	690.677	492.882	0.48677	5e-05	0.00141417
ENSMUST00000028854	ENSMUSG00000027375	Mal	chr2:127633225-127656695	56.4735	37.7135	0.582493	5e-05	0.00141417
ENSMUST00000028855	ENSMUSG00000027376	Prom2	chr2:127526472-127541467	1.74467	0.992117	0.81437	0.00025	0.00588258
ENSMUST00000028850	ENSMUSG00000079056	Kcnip3	chr2:127456497-127521370	0.603401	0.241106	1.32345	0.0002	0.00485099
ENSMUST00000174355	ENSMUSG00000002985	Apoe	chr7:19696108-19699166	103.811	61.6727	0.751261	5e-05	0.00141417
ENSMUST00000036113	ENSMUSG00000039976	Tbc1d16	chr11:119143044-119228499	11.1434	7.79758	0.515094	5e-05	0.00141417
ENSMUST00000059272	ENSMUSG00000043342	Hoxd9	chr2:74697726-74700208	12.2936	7.07437	0.797229	5e-05	0.00141417
ENSMUST00000029795	ENSMUSG00000028150	Rorc	chr3:94372793-94404501	20.4732	10.7783	0.925607	5e-05	0.00141417
ENSMUST00000100167	ENSMUSG00000023088	Abcc1	chr16:14361559-14475737	3.28116	2.18279	0.588035	5e-05	0.00141417
ENSMUST00000031002	ENSMUSG00000029119	Man2b2	chr5:36806920-36830653	25.9151	17.1892	0.592289	5e-05	0.00141417
ENSMUST00000096224	ENSMUSG00000022994	Adcy6	chr15:98589993-98607633	13.8891	10.8757	0.352847	0.00155	0.0272269
ENSMUST00000016172	ENSMUSG00000016028	Celsr1	chr15:85898757-86033777	4.71195	3.51703	0.421967	0.0001	0.00265335
ENSMUST00000194632	ENSMUSG00000033684	Qsox1	chr1:155778157-155812889	4.9163	3.19797	0.620419	0.0023	0.0374907
ENSMUST00000041407	ENSMUSG00000036169	Sostdc1	chr12:36314168-36318452	35.1118	21.9671	0.67661	5e-05	0.00141417
ENSMUST00000051065	ENSMUSG00000045441	Gprin3	chr6:59347225-59426294	3.44145	2.66585	0.368417	0.00275	0.0432258
ENSMUST00000102852	ENSMUSG00000050737	Ptges	chr2:30889470-30903297	5.18386	2.5539	1.02133	5e-05	0.00141417
ENSMUST00000060271	ENSMUSG00000047861	Foxi1	chr11:34204337-34208089	9.57357	5.52062	0.794225	5e-05	0.00141417
ENSMUST00000103029	ENSMUSG00000020806	Rhbdf2	chr11:116598164-116627019	2.97435	1.8881	0.655642	5e-05	0.00141417
ENSMUST00000027518	ENSMUSG00000026295	Spp2	chr1:88406960-88426438	269.445	178.404	0.594844	5e-05	0.00141417
ENSMUST00000115361	ENSMUSG00000017978	Cadps2	chr6:23262772-23839421	4.81451	2.36803	1.02371	5e-05	0.00141417
ENSMUST00000022272	ENSMUSG00000021752	Kctd6	chr14:8214147-8223567	11.1316	7.66729	0.537868	0.00045	0.009687
ENSMUST00000169807	ENSMUSG00000018537	Pcgf2	chr11:97688822-97700497	3.92268	2.13864	0.875144	0.0001	0.00265335
ENSMUST00000034378	ENSMUSG00000031904	Slc7a6	chr8:106168874-106198704	1.12846	0.664683	0.763623	0.0002	0.00485099
ENSMUST00000042661	ENSMUSG00000036565	Ttyh3	chr5:140620577-140649031	10.6437	7.7618	0.455536	0.0001	0.00265335
ENSMUST00000049393	ENSMUSG00000037007	Zfp113	chr5:138139701-138155744	3.22858	2.36807	0.447188	0.0011	0.020454
ENSMUST00000171629	ENSMUSG00000045094	Arhgef37	chr18:61493793-61536536	0.716147	0.252955	1.50138	5e-05	0.00141417
ENSMUST00000077977	ENSMUSG00000026858	Fam73b	chr2:30364232-30385521	9.29082	6.96352	0.415989	0.0018	0.0306903
ENSMUST00000081326	ENSMUSG00000071551	Akr1c19	chr13:4228699-4248360	13.3864	8.16517	0.71321	5e-05	0.00141417
ENSMUST00000201185	ENSMUSG00000026879	Gsn	chr2:35256379-35307892	13.1411	7.01074	0.906442	0.0001	0.00265335
ENSMUST00000081496	ENSMUSG00000024940	Ltbp3	chr19:5740903-5771401	4.17684	2.17097	0.944073	0.0001	0.00265335
ENSMUST00000020768	ENSMUSG00000020475	Pgam2	chr11:5801639-5803733	26.2862	12.5818	1.06296	5e-05	0.00141417
ENSMUST00000059826	ENSMUSG00000050556	Kcnb1	chr2:167103377-167240604	1.61615	1.04562	0.628198	0.00245	0.0394568
ENSMUST00000035158	ENSMUSG00000032554	Trf	chr9:103188031-103230444	6.91178	3.531	0.968979	5e-05	0.00141417
ENSMUST00000035155	ENSMUSG00000032549	Rab6b	chr9:103111806-103185276	3.48146	2.39654	0.53874	0.0001	0.00265335
ENSMUST00000119499	ENSMUSG00000037606	Osbpl5	chr7:143688761-143756985	16.8289	11.2544	0.580452	5e-05	0.00141417
ENSMUST00000033876	ENSMUSG00000031486	Adgra2	chr8:27085582-27123436	4.31371	2.65703	0.699118	5e-05	0.00141417
ENSMUST00000106098	ENSMUSG00000025477	Inpp5a	chr7:139389108-139579652	13.5273	9.72002	0.476844	0.0002	0.00485099
ENSMUST00000168120	ENSMUSG00000072949	Acot1	chr12:84009501-84017670	31.3554	21.1663	0.566945	5e-05	0.00141417
ENSMUST00000121391	ENSMUSG00000012123	Aim1l	chr4:134065911-134092504	2.07766	0.506115	2.03742	5e-05	0.00141417
ENSMUST00000041053	ENSMUSG00000036880	Acaa2	chr18:74779196-74806207	214.22	111.125	0.946906	5e-05	0.00141417
ENSMUST00000069799	ENSMUSG00000055980	Irs1	chr1:82233100-82291416	3.37985	2.16563	0.64217	5e-05	0.00141417
ENSMUST00000093962	ENSMUSG00000070348	Ccnd1	chr7:144915099-144939869	202.906	120.297	0.754218	5e-05	0.00141417
ENSMUST00000093969	ENSMUSG00000020527	Myo19	chr11:84876314-84916366	10.6336	6.59318	0.689589	5e-05	0.00141417
ENSMUST00000110341	ENSMUSG00000027381	Bcl2l11	chr2:128126037-128162547	2.59682	1.64638	0.657446	5e-05	0.00141417
ENSMUST00000031017	ENSMUSG00000029135	Fosl2	chr5:32135800-32157842	4.49451	2.71701	0.726147	5e-05	0.00141417
ENSMUST00000043183	ENSMUSG00000031877	Ces2g	chr8:104961717-104969537	5.97933	3.51046	0.768325	5e-05	0.00141417
ENSMUST00000075406	ENSMUSG00000033253	Szt2	chr4:118362742-118409273	3.84491	2.9546	0.379984	0.00125	0.0228388
ENSMUST00000081510	ENSMUSG00000054612	Mgmt	chr7:136894610-137128187	4.09817	2.01532	1.02397	5e-05	0.00141417
ENSMUST00000075774	ENSMUSG00000045136	Tubb2b	chr13:34127007-34130354	4.62465	2.63419	0.811986	5e-05	0.00141417
ENSMUST00000029711	ENSMUSG00000005640	Insrr	chr3:87749096-87824306	3.88157	2.38381	0.703372	0.001	0.0189868
ENSMUST00000055184	ENSMUSG00000050675	Gp1ba	chr11:70639121-70642036	0.689667	0.2488	1.47091	0.0003	0.00690244
ENSMUST00000118648	ENSMUSG00000039713	Plekhg5	chr4:152072497-152115400	6.17192	3.49869	0.818904	5e-05	0.00141417
ENSMUST00000022185	ENSMUSG00000021678	F2rl1	chr13:95511731-95525240	6.75221	4.71197	0.519028	0.0001	0.00265335
ENSMUST00000097649	ENSMUSG00000026305	Lrrfip1	chr1:90998736-91128944	8.21154	5.90284	0.476244	0.00035	0.00785859
ENSMUST00000070080	ENSMUSG00000056124	B4galt6	chr18:20684598-20746404	3.12313	2.04975	0.607545	5e-05	0.00141417
ENSMUST00000050467	ENSMUSG00000048546	Tob2	chr15:81848269-81858326	32.859	14.4077	1.18945	5e-05	0.00141417
ENSMUST00000099557	ENSMUSG00000074923	Pak6	chr2:118663302-118698020	1.07664	0.489435	1.13734	5e-05	0.00141417
