# Supplementary material for: Altered Expression of Long Noncoding and Messenger RNAs in Diabetic Nephropathy following Treatment with Rosiglitazone
Source: Biomed Res Int. 2020 Jan 12;2020:1360843. doi: 10.1155/2020/1360843 (PMC6983290; doi:10.1155/2020/1360843)
Supplement: Supplementary Materials — Supplementary Table 1: significantly upregulated mRNAs in dbdb mice compared to the control group. Supplementary Table 2: significantly downregulated mRNAs in dbdb mice compared to the control group. Supplementary Table 3: significantly upregulated mRNAs in dbR mice compared to the dbdb group. Supplementary Table 4: significantly downregulated mRNAs in dbR mice compared to the dbdb group. Supplementary Table 5: mRNAs significantly upregulated by diabetic nephropathy yet reversed following rosiglitazone treatment. Supplementary Table 6: mRNAs significantly downregulated by diabetic nephropathy yet reversed following rosiglitazone treatment. Supplementary Table 7: significantly upregulated lncRNAs in dbdb mice compared to the control group. Supplementary Table 8: significantly downregulated lncRNAs in dbdb mice compared to the control group. Supplementary Table 9: significantly upregulated lncRNAs in dbR mice compared to the dbdb group. Supplementary Table 10: significantly downregulated lncRNAs in dbR mice compared to the dbdb group. Supplementary Table 11: lncRNAs significantly upregulated by diabetic nephropathy yet reversed following rosiglitazone treatment. Supplementary Table 12: lncRNAs significantly downregulated by diabetic nephropathy yet reversed following rosiglitazone treatment. Supplementary Table 13: differentially expressed lncRNAs colocated with genes. Supplementary Table 14: differentially expressed lncRNAs coexpressed with genes. Supplementary Table 15: top 20 significantly enriched GO terms associated with differentially expressed mRNAs in the kidneys of dbdb mice compared to the controls. Supplementary Table 16: top 20 significantly enriched GO terms associated with differentially expressed mRNAs in the kidneys of dbR mice compared to the dbdb group. Supplementary Table 17: top 20 significantly enriched GO terms associated with differentially expressed lncRNAs coexpressed with genes in the kidneys of dbdb mice compared to the controls. Supplementa [file 1360843.f1.zip › 1360843.f1/Supplementary Table 2.xls]

## Sheet: Table S2 mRNA_dbdb_vs_Control.D
Supplementary Table 2 Significantly down-regulated mRNAs in dbdb mice compared to the control group
transcript_id	gene_id	gene_name	gene_location	dbdb_FPKM	Control_FPKM	log2(foldchange)	pvalue	qvalue
ENSMUST00000114694	ENSMUSG00000022708	Zbtb20	chr16:42907644-43642602	42.1484	70.2955	-0.737954	5e-05	0.00141417
ENSMUST00000048050	ENSMUSG00000041737	Tmem45b	chr9:31426198-31464238	6.7086	9.60902	-0.518376	0.0005	0.0106375
ENSMUST00000077282	ENSMUSG00000054843	Atrnl1	chr19:57611033-58133338	17.1839	24.356	-0.503223	5e-05	0.00141417
ENSMUST00000132280	ENSMUSG00000020681	Ace	chr11:105967944-105989964	2.662	10.4112	-1.96755	5e-05	0.00141417
ENSMUST00000164732	ENSMUSG00000091382	Vmn1r18	chr6:57389579-57390666	1.95688	5.22938	-1.41808	5e-05	0.00141417
ENSMUST00000020301	ENSMUSG00000020101	4632428N05Rik	chr10:60302747-60696490	0.69864	1.25286	-0.842608	0.001	0.0189868
ENSMUST00000154424	ENSMUSG00000040855	Reps2	chrX:162411953-162643649	13.8674	21.1841	-0.61129	5e-05	0.00141417
ENSMUST00000058488	ENSMUSG00000032353	Tmed3	chr9:89699204-89705068	18.0821	23.5153	-0.379041	0.0021	0.034862
ENSMUST00000029504	ENSMUSG00000046213	Cym	chr3:107211292-107221732	0.495385	1.8218	-1.87874	5e-05	0.00141417
ENSMUST00000013755	ENSMUSG00000013611	Snx31	chr15:36504061-36555573	1.66222	3.33082	-1.00277	0.00015	0.00378624
ENSMUST00000056946	ENSMUSG00000047180	Neurl3	chr1:36264596-36274679	1.05061	1.6036	-0.610089	0.00185	0.031399
ENSMUST00000095762	ENSMUSG00000019787	Trdn	chr10:33083482-33476709	1.08737	5.8017	-2.41563	5e-05	0.00141417
ENSMUST00000095767	ENSMUSG00000004151	Etv1	chr12:38779379-38868215	8.25646	12.3564	-0.581668	5e-05	0.00141417
ENSMUST00000046518	ENSMUSG00000057963	Itpk1	chr12:102568581-102704930	6.40709	8.41849	-0.393892	0.0018	0.0306903
ENSMUST00000046515	ENSMUSG00000027698	Nceh1	chr3:27182964-27284608	52.2492	81.948	-0.6493	5e-05	0.00141417
ENSMUST00000029076	ENSMUSG00000027559	Car3	chr3:14863537-14872523	13.9591	31.4348	-1.17116	5e-05	0.00141417
ENSMUST00000112028	ENSMUSG00000025198	Erlin1	chr19:44034943-44069785	18.5377	30.3649	-0.711942	5e-05	0.00141417
ENSMUST00000030305	ENSMUSG00000028571	Cyp2j13	chr4:96027533-96077546	29.9822	84.6268	-1.49701	5e-05	0.00141417
ENSMUST00000062370	ENSMUSG00000045690	Wdr89	chr12:75630595-75669537	0.450947	1.14085	-1.33908	0.0011	0.020454
ENSMUST00000020403	ENSMUSG00000020186	Csrp2	chr10:110920176-110939599	107.172	151.997	-0.504119	5e-05	0.00141417
ENSMUST00000041768	ENSMUSG00000033715	Akr1c14	chr13:4049010-4090422	14.0633	114.217	-3.02176	5e-05	0.00141417
ENSMUST00000046285	ENSMUSG00000036887	C1qa	chr4:136895916-136898803	10.7114	15.2381	-0.508543	0.00045	0.009687
ENSMUST00000101168	ENSMUSG00000079029	Gm5662	chr12:88270639-88274500	0	0.883987	#NAME?	5e-05	0.00141417
ENSMUST00000168406	ENSMUSG00000023367	Tmem176a	chr6:48833817-48845869	138.67	327.909	-1.24164	5e-05	0.00141417
ENSMUST00000134503	ENSMUSG00000006345	Ggt1	chr10:75561603-75586200	198.663	373.311	-0.910055	5e-05	0.00141417
ENSMUST00000075994	ENSMUSG00000035357	Pdzrn3	chr6:101059170-101377897	7.63362	11.9363	-0.644913	5e-05	0.00141417
ENSMUST00000019734	ENSMUSG00000019590	Cyb561	chr11:105933701-105953336	7.96671	12.6709	-0.669463	5e-05	0.00141417
ENSMUST00000001806	ENSMUSG00000001755	Coasy	chr11:101082564-101086619	48.7331	91.4233	-0.90766	5e-05	0.00141417
ENSMUST00000028881	ENSMUSG00000027398	Il1b	chr2:129364569-129371139	0.214468	0.664586	-1.63169	0.00225	0.0368149
ENSMUST00000111827	ENSMUSG00000079262	Slco1a6	chr6:142085760-142208521	91.3609	129.576	-0.504148	5e-05	0.00141417
ENSMUST00000029135	ENSMUSG00000027605	Acss2	chr2:155490378-155592810	71.1903	101.827	-0.516366	0.0016	0.0279374
ENSMUST00000022108	ENSMUSG00000021613	Hapln1	chr13:89540635-89611832	0.185106	0.922822	-2.3177	5e-05	0.00141417
ENSMUST00000023854	ENSMUSG00000023092	Fhl1	chrX:56731786-56793346	98.7238	133.908	-0.439769	0.0002	0.00485099
ENSMUST00000168166	ENSMUSG00000007656	Arpp19	chr9:75037613-75060313	9.2982	13.5454	-0.54278	0.0004	0.00878381
ENSMUST00000070004	ENSMUSG00000031958	Ldhd	chr8:111626270-111630374	139.401	402.783	-1.53076	5e-05	0.00141417
ENSMUST00000053699	ENSMUSG00000035093	Secisbp2l	chr2:125736985-125782870	26.0914	34.7468	-0.413305	0.0003	0.00690244
ENSMUST00000079472	ENSMUSG00000057228	Aadat	chr8:60506123-60545677	85.1247	132.014	-0.633044	5e-05	0.00141417
ENSMUST00000064547	ENSMUSG00000052605	Isoc2b	chr7:4844959-4866179	7.63147	12.9805	-0.766316	5e-05	0.00141417
ENSMUST00000050780	ENSMUSG00000051262	Cml3	chr6:85760648-85765744	5.29582	8.53781	-0.689012	5e-05	0.00141417
ENSMUST00000046122	ENSMUSG00000039682	Lap3	chr5:45493373-45512691	123.789	218.083	-0.816988	5e-05	0.00141417
ENSMUST00000120655	ENSMUSG00000049723	Mmp12	chr9:7344380-7388047	0.200371	0.689879	-1.78367	0.0008	0.0157593
ENSMUST00000169652	ENSMUSG00000049625	Tifab	chr13:56173702-56178885	0.438756	0.960346	-1.13014	5e-05	0.00141417
ENSMUST00000030882	ENSMUSG00000029017	Pmpcb	chr5:21737140-21757152	114.189	152.218	-0.414723	0.0001	0.00265335
ENSMUST00000172032	ENSMUSG00000091813	Ces2h	chr8:105000852-105020410	0.310785	1.61399	-2.37664	5e-05	0.00141417
ENSMUST00000035938	ENSMUSG00000035042	Ccl5	chr11:83525777-83530518	1.16082	3.11214	-1.42277	0.00175	0.0300127
ENSMUST00000002655	ENSMUSG00000002580	Mien1	chr11:98412469-98439046	68.5074	106.965	-0.642811	0.00035	0.00785859
ENSMUST00000108319	ENSMUSG00000040738	Ints8	chr4:11191353-11254258	8.87778	12.0303	-0.438406	0.0006	0.0124324
ENSMUST00000087012	ENSMUSG00000067144	Slc22a7	chr17:46432184-46438477	0.433933	31.3505	-6.17487	5e-05	0.00141417
ENSMUST00000034915	ENSMUSG00000032359	Ctsh	chr9:90054151-90076089	83.0099	112.277	-0.435703	0.0001	0.00265335
ENSMUST00000070215	ENSMUSG00000056209	Npm3	chr19:45747733-45749591	14.1619	40.6596	-1.52158	5e-05	0.00141417
ENSMUST00000057019	ENSMUSG00000044338	Aplnr	chr2:85136224-85139923	0.628609	2.6525	-2.07712	5e-05	0.00141417
ENSMUST00000196304	ENSMUSG00000007415	Gatad1	chr5:3571672-3680325	47.497	82.5548	-0.797515	0.00295	0.0455823
ENSMUST00000068168	ENSMUSG00000026004	Kansl1l	chr1:66700830-66817562	11.84	18.1744	-0.618247	0.00105	0.019753
ENSMUST00000067801	ENSMUSG00000024039	Cbs	chr17:31612622-31637199	19.4468	34.0957	-0.810058	0.00055	0.0115424
ENSMUST00000147545	ENSMUSG00000048701	Ccdc6	chr10:70097120-70193200	22.0263	35.4355	-0.685972	5e-05	0.00141417
ENSMUST00000041871	ENSMUSG00000037477	Tbx10	chr19:3992751-3999511	0.552193	1.43205	-1.37484	5e-05	0.00141417
ENSMUST00000164853	ENSMUSG00000078588	Ccdc24	chr4:117834505-117872554	1.10116	1.83211	-0.734489	0.00125	0.0228388
ENSMUST00000043349	ENSMUSG00000041078	Grid1	chr14:34819824-35583379	0.565049	1.01822	-0.849597	5e-05	0.00141417
ENSMUST00000044694	ENSMUSG00000039438	Ttc36	chr9:44799399-44802951	656.781	873.345	-0.41114	0.00045	0.009687
ENSMUST00000026700	ENSMUSG00000025610	Map3k7cl	chr16:87553329-87595336	9.78812	22.3689	-1.19239	5e-05	0.00141417
ENSMUST00000027071	ENSMUSG00000025937	Lactb2	chr1:13623329-13660546	191.727	289.757	-0.595788	5e-05	0.00141417
ENSMUST00000020488	ENSMUSG00000020255	D10Wsu102e	chr10:83360220-83368835	8.20213	12.7658	-0.638218	5e-05	0.00141417
ENSMUST00000171797	ENSMUSG00000058799	Nap1l1	chr10:111473191-111498142	17.0703	25.8093	-0.596401	5e-05	0.00141417
ENSMUST00000100054	ENSMUSG00000039835	Nhsl1	chr10:18407674-18533892	0.883274	1.48288	-0.747465	0.00275	0.0432258
ENSMUST00000112477	ENSMUSG00000026415	Fcamr	chr1:130800901-130824084	18.1969	33.4135	-0.876742	5e-05	0.00141417
ENSMUST00000110690	ENSMUSG00000022186	Oxct1	chr15:4021685-4155344	341.49	529.489	-0.63276	5e-05	0.00141417
ENSMUST00000110698	ENSMUSG00000055737	Ghr	chr15:3317759-3583230	97.7418	218.366	-1.1597	5e-05	0.00141417
ENSMUST00000090070	ENSMUSG00000054435	Gimap4	chr6:48684548-48692060	14.1267	21.7848	-0.624899	5e-05	0.00141417
ENSMUST00000160565	ENSMUSG00000037849	Gm4955	chr1:173480370-173491041	0.207016	0.627603	-1.60011	0.0002	0.00485099
ENSMUST00000018246	ENSMUSG00000018102	Hist1h2bc	chr13:23684198-23692488	181.641	230.92	-0.346305	0.0014	0.0250158
ENSMUST00000105590	ENSMUSG00000019768	Esr1	chr10:4611988-5005614	2.5866	4.11644	-0.670341	5e-05	0.00141417
ENSMUST00000028807	ENSMUSG00000027332	Ivd	chr2:118861953-118882909	69.5355	110.874	-0.673101	5e-05	0.00141417
ENSMUST00000043138	ENSMUSG00000042105	Inpp5f	chr7:128611359-128696425	18.4314	23.1462	-0.328614	0.00325	0.0493611
ENSMUST00000078752	ENSMUSG00000060227	Casc4	chr2:121866969-121936220	10.7189	19.2597	-0.845434	5e-05	0.00141417
ENSMUST00000074660	ENSMUSG00000031283	Chrdl1	chrX:143285673-143394262	0.0555089	1.03484	-4.22054	0.0006	0.0124324
ENSMUST00000030028	ENSMUSG00000028343	Erp44	chr4:48193322-48279558	23.7559	32.599	-0.45654	5e-05	0.00141417
ENSMUST00000103194	ENSMUSG00000000805	Car4	chr11:84957787-84966044	51.099	137.309	-1.42606	5e-05	0.00141417
ENSMUST00000114415	ENSMUSG00000038331	Satb2	chr1:56793980-56978650	1.24714	2.25003	-0.851327	0.0011	0.020454
ENSMUST00000098300	ENSMUSG00000035704	Alg8	chr7:97371605-97392185	2.70581	3.91285	-0.53216	0.00135	0.0242813
ENSMUST00000067532	ENSMUSG00000024672	Ms4a7	chr19:11321038-11336144	0.167357	0.679107	-2.02071	0.00105	0.019753
ENSMUST00000109916	ENSMUSG00000068130	Zfp442	chr2:150407140-150451486	2.39122	5.36357	-1.16545	5e-05	0.00141417
ENSMUST00000001963	ENSMUSG00000020681	Ace	chr11:105967944-105989964	7.88669	35.6262	-2.17545	5e-05	0.00141417
ENSMUST00000071985	ENSMUSG00000040693	Slco4c1	chr1:96816269-96872171	2.39103	4.08846	-0.773923	5e-05	0.00141417
ENSMUST00000075072	ENSMUSG00000021886	Gpr65	chr12:98268634-98276624	0.624387	1.07208	-0.779903	0.00235	0.038101
ENSMUST00000108393	ENSMUSG00000017688	Hnf4g	chr3:3508029-3658052	2.65655	5.30852	-0.998754	5e-05	0.00141417
ENSMUST00000108394	ENSMUSG00000017688	Hnf4g	chr3:3508029-3658052	1.49129	2.79626	-0.906933	0.0016	0.0279374
ENSMUST00000030074	ENSMUSG00000028381	Ugcg	chr4:59189256-59222833	6.21586	10.5532	-0.763656	5e-05	0.00141417
ENSMUST00000028663	ENSMUSG00000027230	Creb3l1	chr2:91982327-92024502	0.602646	1.19442	-0.986925	0.0001	0.00265335
ENSMUST00000111442	ENSMUSG00000079227	Ccr5	chr9:124121542-124127182	0.477643	0.830618	-0.798252	0.00295	0.0455823
ENSMUST00000067888	ENSMUSG00000029735	Tpk1	chr6:43345000-43666278	25.6791	43.965	-0.775763	5e-05	0.00141417
ENSMUST00000056635	ENSMUSG00000049878	Rlf	chr4:121145372-121215084	7.09456	11.8426	-0.739201	5e-05	0.00141417
ENSMUST00000121404	ENSMUSG00000058022	Adtrp	chr13:41763147-41847684	10.9794	17.5485	-0.676547	0.00295	0.0455823
ENSMUST00000030964	ENSMUSG00000029084	Cd38	chr5:43868552-43912375	2.82493	3.86479	-0.452175	0.0017	0.0293704
ENSMUST00000037998	ENSMUSG00000041779	Tram2	chr1:20996298-21079229	1.21654	1.73674	-0.513596	0.00065	0.0133036
ENSMUST00000073109	ENSMUSG00000047409	Ctdspl	chr9:118926452-119043998	12.1139	17.7346	-0.549906	5e-05	0.00141417
ENSMUST00000079028	ENSMUSG00000022325	Pop1	chr15:34495303-34530648	2.04521	4.25233	-1.056	5e-05	0.00141417
ENSMUST00000025694	ENSMUSG00000024766	Lipo1	chr19:33555159-33769142	3.73086	18.0778	-2.27664	5e-05	0.00141417
ENSMUST00000102980	ENSMUSG00000001642	Akr1b3	chr6:34303933-34317478	19.9364	47.5146	-1.25297	5e-05	0.00141417
ENSMUST00000084343	ENSMUSG00000066071	Cyp4a12a	chr4:115299045-115332815	26.3029	127.019	-2.27175	5e-05	0.00141417
ENSMUST00000027760	ENSMUSG00000026482	Rgl1	chr1:152516759-152766351	37.5663	54.6971	-0.542027	5e-05	0.00141417
ENSMUST00000057829	ENSMUSG00000044018	Mrpl50	chr4:49512595-49521093	44.1209	55.2403	-0.32426	0.003	0.0461893
ENSMUST00000022281	ENSMUSG00000016018	Skiv2l2	chr13:112800893-112927380	18.7151	33.9628	-0.859749	5e-05	0.00141417
ENSMUST00000108243	ENSMUSG00000027665	Pik3ca	chr3:32397670-32468486	19.2129	24.7648	-0.366215	0.00085	0.0165966
ENSMUST00000108246	ENSMUSG00000041058	Wwp1	chr4:19575161-19708993	38.309	57.6945	-0.590749	5e-05	0.00141417
ENSMUST00000026595	ENSMUSG00000025521	Tmem192	chr8:64947184-64969034	17.7528	23.6919	-0.416348	0.0017	0.0293704
ENSMUST00000076846	ENSMUSG00000031750	Il34	chr8:110741839-110807477	1.59901	5.81311	-1.86213	5e-05	0.00141417
ENSMUST00000033664	ENSMUSG00000031304	Il2rg	chrX:101261375-101269023	0.899345	1.67155	-0.894238	0.00045	0.009687
ENSMUST00000035625	ENSMUSG00000039519	Cyp7b1	chr3:18071949-18243338	3.24579	60.9975	-4.23211	5e-05	0.00141417
ENSMUST00000063042	ENSMUSG00000045594	Glb1	chr9:114401075-114474376	21.2428	43.1605	-1.02274	5e-05	0.00141417
ENSMUST00000034178	ENSMUSG00000031725	Ces1f	chr8:93256235-93279747	176.49	590.129	-1.74145	5e-05	0.00141417
ENSMUST00000037488	ENSMUSG00000035954	Dock4	chr12:40446052-40846486	3.70489	7.29696	-0.977864	5e-05	0.00141417
ENSMUST00000160719	ENSMUSG00000031647	Mfap3l	chr8:60632826-60676729	27.8137	49.675	-0.836726	5e-05	0.00141417
ENSMUST00000015511	ENSMUSG00000030123	Plxnd1	chr6:115954810-115995005	5.33821	8.4088	-0.655543	5e-05	0.00141417
ENSMUST00000092163	ENSMUSG00000069516	Lyz2	chr10:117277333-117282274	6.04549	13.2996	-1.13745	5e-05	0.00141417
ENSMUST00000035390	ENSMUSG00000037053	Azgp1	chr5:137981538-137990233	29.5199	134.575	-2.18865	5e-05	0.00141417
ENSMUST00000060598	ENSMUSG00000044249	Defb29	chr2:152538713-152540098	47.4057	93.8538	-0.985355	5e-05	0.00141417
ENSMUST00000082426	ENSMUSG00000034785	Dio1	chr4:107291464-107307169	6.50151	11.6603	-0.842761	5e-05	0.00141417
ENSMUST00000082424	ENSMUSG00000064373	Sepp1	chr15:3268546-3280508	687.635	1975.33	-1.52238	5e-05	0.00141417
ENSMUST00000023590	ENSMUSG00000022877	Hrg	chr16:22951071-22961656	0.531092	2.77054	-2.38313	5e-05	0.00141417
ENSMUST00000035982	ENSMUSG00000041058	Wwp1	chr4:19575161-19708993	12.0826	21.6557	-0.841822	0.00105	0.019753
ENSMUST00000020215	ENSMUSG00000020027	Socs2	chr10:95411489-95417180	2.77029	6.7806	-1.29137	5e-05	0.00141417
ENSMUST00000107426	ENSMUSG00000042642	Flad1	chr3:89400987-89411870	3.71733	5.94873	-0.678316	0.00135	0.0242813
ENSMUST00000010049	ENSMUSG00000009905	Kdsr	chr1:106720458-106759727	7.15483	10.2525	-0.518984	5e-05	0.00141417
ENSMUST00000165519	ENSMUSG00000035164	Zc3h12c	chr9:52111984-52168111	14.0688	17.8645	-0.344594	0.00175	0.0300127
ENSMUST00000012587	ENSMUSG00000012443	Kif11	chr19:37376402-37421859	0.366676	0.69054	-0.913221	5e-05	0.00141417
ENSMUST00000175795	ENSMUSG00000031734	Irx3	chr8:91798524-91807539	12.5545	16.1704	-0.365152	0.00225	0.0368149
ENSMUST00000045075	ENSMUSG00000034641	Cd300ld	chr11:114982273-114989922	0.144144	0.447308	-1.63375	0.0002	0.00485099
ENSMUST00000093193	ENSMUSG00000020143	Dock2	chr11:34226814-34783892	0.284701	0.656737	-1.20587	0.00125	0.0228388
ENSMUST00000046522	ENSMUSG00000040283	Btnl9	chr11:49165584-49187159	1.90395	3.96051	-1.05669	5e-05	0.00141417
ENSMUST00000164273	ENSMUSG00000031934	Panx1	chr9:15005160-15045478	0.14624	0.402489	-1.46061	0.00035	0.00785859
ENSMUST00000087475	ENSMUSG00000038079	Tmem237	chr1:59100589-59120408	4.97811	9.49865	-0.932123	5e-05	0.00141417
ENSMUST00000061295	ENSMUSG00000038009	Dnajc22	chr15:99099411-99104737	39.5871	65.8983	-0.73521	5e-05	0.00141417
ENSMUST00000079681	ENSMUSG00000057778	Cyb5d2	chr11:72777231-72796142	3.92842	5.64243	-0.522367	0.00325	0.0493611
ENSMUST00000029046	ENSMUSG00000027533	Fabp5	chr3:10012547-10016607	2.63935	7.05094	-1.41763	5e-05	0.00141417
ENSMUST00000029041	ENSMUSG00000062515	Fabp4	chr3:10204087-10208576	25.8917	36.2773	-0.486575	5e-05	0.00141417
ENSMUST00000093902	ENSMUSG00000070327	Rnf213	chr11:119393099-119487418	7.99611	10.1891	-0.349656	0.00195	0.0327838
ENSMUST00000033822	ENSMUSG00000031445	Proz	chr8:13060907-13075006	2.74812	3.99502	-0.539759	0.00085	0.0165966
ENSMUST00000034650	ENSMUSG00000032135	Mcam	chr9:44134561-44142727	1.79664	3.32241	-0.886931	5e-05	0.00141417
ENSMUST00000086278	ENSMUSG00000066829	Zfp810	chr9:22276747-22307638	8.6675	14.2713	-0.719426	5e-05	0.00141417
ENSMUST00000032888	ENSMUSG00000030654	Arl6ip1	chr7:118118890-118129662	150.983	194.946	-0.368693	0.001	0.0189868
ENSMUST00000118833	ENSMUSG00000015804	Med28	chr5:45520228-45529276	21.128	40.8539	-0.951316	0.0028	0.0438435
ENSMUST00000139049	ENSMUSG00000079104	Prps1l3	chr12:57230411-57497199	13.9995	18.8087	-0.426023	0.0024	0.0387964
ENSMUST00000014370	ENSMUSG00000014226	Cacybp	chr1:160202366-160212875	15.526	21.4317	-0.465064	0.0001	0.00265335
ENSMUST00000120540	ENSMUSG00000052562	Slc22a30	chr19:8335370-8405111	13.0262	33.8354	-1.37712	5e-05	0.00141417
ENSMUST00000099678	ENSMUSG00000075012	Fjx1	chr2:102449365-102452499	0.652103	1.07988	-0.727696	0.0005	0.0106375
ENSMUST00000111045	ENSMUSG00000048482	Bdnf	chr2:109674699-109727007	1.64193	2.69983	-0.717479	5e-05	0.00141417
ENSMUST00000027131	ENSMUSG00000025986	Slc39a10	chr1:46807543-46892852	8.55256	14.2989	-0.74148	5e-05	0.00141417
ENSMUST00000020022	ENSMUSG00000019872	Smpdl3a	chr10:57794334-57811830	242.545	348.288	-0.522029	5e-05	0.00141417
ENSMUST00000035007	ENSMUSG00000032434	Cmtm6	chr9:114731202-114749343	39.624	80.6639	-1.02555	5e-05	0.00141417
ENSMUST00000025425	ENSMUSG00000024542	Cep192	chr18:67800106-67885168	2.14159	2.91622	-0.445419	0.00055	0.0115424
ENSMUST00000020885	ENSMUSG00000020570	Sypl	chr12:32953890-32979050	81.0499	109.589	-0.435224	0.00125	0.0228388
ENSMUST00000045229	ENSMUSG00000038497	Tmco3	chr8:13255962-13322924	7.32207	18.3292	-1.32382	5e-05	0.00141417
ENSMUST00000098657	ENSMUSG00000074254	Cyp2a4	chr7:26304420-26315088	127.902	452.982	-1.82442	5e-05	0.00141417
ENSMUST00000068813	ENSMUSG00000055312	Them7	chr2:105224319-105379796	81.9996	135.296	-0.722432	5e-05	0.00141417
ENSMUST00000040912	ENSMUSG00000036777	Anln	chr9:22331213-22389206	0.300211	0.491977	-0.712613	0.00215	0.0355551
ENSMUST00000033509	ENSMUSG00000031168	Ebp	chrX:8185328-8193512	29.6245	38.6363	-0.383164	0.00125	0.0228388
ENSMUST00000004673	ENSMUSG00000004558	Ndrg2	chr14:51905270-51913488	15.0343	24.0571	-0.678204	5e-05	0.00141417
ENSMUST00000021004	ENSMUSG00000020672	Sntg2	chr12:30174482-30373375	0.192784	0.568718	-1.56073	0.0001	0.00265335
ENSMUST00000078869	ENSMUSG00000071177	Serpina1d	chr12:103728155-103830373	50.1955	94.0893	-0.906472	5e-05	0.00141417
ENSMUST00000055052	ENSMUSG00000061825	Ces2c	chr8:104847067-104854483	44.5313	124.811	-1.48685	5e-05	0.00141417
ENSMUST00000129829	ENSMUSG00000039997	Ifi203	chr1:173857219-173942672	1.28172	2.9977	-1.22577	0.00015	0.00378624
ENSMUST00000034945	ENSMUSG00000032381	Fam96a	chr9:66126610-66138955	59.9643	81.7761	-0.447576	0.00015	0.00378624
ENSMUST00000034946	ENSMUSG00000032382	Snx1	chr9:66088132-66126587	44.7875	57.693	-0.365301	0.0009	0.0174274
ENSMUST00000094463	ENSMUSG00000070576	Mn1	chr5:111417441-111457033	0.517443	0.879671	-0.765563	5e-05	0.00141417
ENSMUST00000040284	ENSMUSG00000036299	BC031181	chr18:75005899-75009933	70.2188	88.4714	-0.333353	0.0026	0.0414406
ENSMUST00000025875	ENSMUSG00000024935	Slc1a1	chr19:28835073-28913960	50.2559	73.2509	-0.543553	5e-05	0.00141417
ENSMUST00000161401	ENSMUSG00000063694	Cycs	chr6:50562562-50566538	105.114	145.389	-0.467967	5e-05	0.00141417
ENSMUST00000113093	ENSMUSG00000029417	Cxcl9	chr5:92321346-92328079	0.169287	0.498261	-1.55743	0.00015	0.00378624
ENSMUST00000023707	ENSMUSG00000022982	Sod1	chr16:90220741-90226322	523.137	832.503	-0.670265	5e-05	0.00141417
ENSMUST00000036031	ENSMUSG00000039934	Gsap	chr5:21186288-21424677	3.79734	6.40259	-0.753665	5e-05	0.00141417
ENSMUST00000033715	ENSMUSG00000031349	Nsdhl	chrX:72918556-72958514	32.5443	46.9004	-0.527194	5e-05	0.00141417
ENSMUST00000120522	ENSMUSG00000053303	Slc22a26	chr19:7781040-7802667	0.276779	5.56014	-4.32831	5e-05	0.00141417
ENSMUST00000111820	ENSMUSG00000079260	Tmppe	chr9:114401075-114474376	4.44033	7.16927	-0.691158	0.00075	0.0149651
ENSMUST00000107302	ENSMUSG00000017801	Mlx	chr11:101087276-101095436	13.9425	23.4761	-0.751699	5e-05	0.00141417
ENSMUST00000034594	ENSMUSG00000032089	Il10ra	chr9:45253836-45269149	0.526801	1.41929	-1.42984	5e-05	0.00141417
ENSMUST00000019974	ENSMUSG00000019832	Rab32	chr10:10545010-10558233	4.82122	6.98058	-0.533947	0.0002	0.00485099
ENSMUST00000019977	ENSMUSG00000063428	Ddo	chr10:40630010-40649931	10.89	13.8351	-0.345334	0.0033	0.0499537
ENSMUST00000110064	ENSMUSG00000068205	Macrod2	chr2:140395308-142392966	30.3683	49.7182	-0.711206	5e-05	0.00141417
ENSMUST00000089465	ENSMUSG00000050014	Apol10b	chr15:77584157-77596125	0.0751417	0.35905	-2.2565	0.00175	0.0300127
ENSMUST00000112640	ENSMUSG00000026389	Steap3	chr1:120190756-120272705	0.642805	1.31733	-1.03516	0.00025	0.00588258
ENSMUST00000068545	ENSMUSG00000055137	Sugct	chr13:16857854-17694732	59.7965	80.3911	-0.426974	5e-05	0.00141417
ENSMUST00000057288	ENSMUSG00000020571	Pdia6	chr12:17266544-17329359	46.5433	61.2146	-0.395303	0.00065	0.0133036
ENSMUST00000166120	ENSMUSG00000021079	Timm9	chr12:71111427-71136675	8.97292	14.6646	-0.708693	0.00255	0.0407945
ENSMUST00000089058	ENSMUSG00000014426	Map3k4	chr17:12227620-12318660	9.44557	11.9942	-0.344623	0.00275	0.0432258
ENSMUST00000040990	ENSMUSG00000058997	Vwa8	chr14:78849177-79202310	38.8232	52.0335	-0.422521	0.0002	0.00485099
ENSMUST00000165605	ENSMUSG00000038515	Grtp1	chr8:13176868-13200624	28.7027	41.7682	-0.541216	5e-05	0.00141417
ENSMUST00000027670	ENSMUSG00000026415	Fcamr	chr1:130800901-130824084	7.15982	17.5299	-1.29182	5e-05	0.00141417
ENSMUST00000027675	ENSMUSG00000026417	Pigr	chr1:130826683-130852249	75.8117	99.5885	-0.393558	0.0029	0.0449794
ENSMUST00000020027	ENSMUSG00000019877	Serinc1	chr10:57515773-57532530	98.7595	127.064	-0.363565	0.0008	0.0157593
ENSMUST00000064862	ENSMUSG00000054385	Ceacam2	chr7:25516041-25539857	0.894232	3.68517	-2.04301	5e-05	0.00141417
ENSMUST00000033915	ENSMUSG00000031517	Gpm6a	chr8:54954727-55060877	24.7078	43.9236	-0.830029	5e-05	0.00141417
ENSMUST00000033919	ENSMUSG00000031520	Vegfc	chr8:54077531-54186454	0.789067	1.3458	-0.770246	0.00175	0.0300127
ENSMUST00000029769	ENSMUSG00000028124	Gclm	chr3:122245556-122293547	21.3926	44.0307	-1.0414	5e-05	0.00141417
ENSMUST00000032518	ENSMUSG00000030364	Clec2h	chr6:128662384-128677374	5.83429	16.9201	-1.53611	5e-05	0.00141417
ENSMUST00000101281	ENSMUSG00000073000	Gm10451	chr12:76444559-76451336	1.56784	2.39787	-0.612979	0.0031	0.0474879
ENSMUST00000015800	ENSMUSG00000015656	Hspa8	chr9:40800983-40805200	603.063	900.093	-0.577765	5e-05	0.00141417
ENSMUST00000115397	ENSMUSG00000033653	Vps8	chr16:21423117-21644680	2.77527	5.58045	-1.00775	0.0009	0.0174274
ENSMUST00000000260	ENSMUSG00000000253	Gmpr	chr13:45507443-45546382	26.7356	41.1191	-0.621044	5e-05	0.00141417
ENSMUST00000050389	ENSMUSG00000046082	Tmem174	chr13:98634977-98637410	180.474	261.316	-0.534002	5e-05	0.00141417
ENSMUST00000051386	ENSMUSG00000038775	Vill	chr9:119052777-119071519	9.54942	22.5153	-1.23742	5e-05	0.00141417
ENSMUST00000047929	ENSMUSG00000033533	Acsm1	chr7:119602872-119662515	172.316	280.587	-0.703393	5e-05	0.00141417
ENSMUST00000095204	ENSMUSG00000071042	Rasgrp3	chr17:75435904-75529043	0.45941	1.02604	-1.15923	0.003	0.0461893
ENSMUST00000094154	ENSMUSG00000070436	Serpinh1	chr7:99345374-99353230	15.2993	20.9735	-0.455102	0.00025	0.00588258
ENSMUST00000043336	ENSMUSG00000040710	St8sia4	chr1:95587681-95667571	0.371664	0.833397	-1.165	0.00035	0.00785859
ENSMUST00000026068	ENSMUSG00000025082	Vwa2	chr19:56874248-56912078	1.48955	2.57439	-0.789354	5e-05	0.00141417
ENSMUST00000043598	ENSMUSG00000038217	Tlcd2	chr11:75468078-75470899	0.955232	2.11866	-1.14923	0.00085	0.0165966
ENSMUST00000007253	ENSMUSG00000007038	Neu1	chr17:34931252-34935921	124.829	170.324	-0.448326	5e-05	0.00141417
ENSMUST00000095786	ENSMUSG00000030042	Pole4	chr6:82621851-82652929	6.89774	9.75497	-0.500014	0.00025	0.00588258
ENSMUST00000020253	ENSMUSG00000060002	Chpt1	chr10:88452744-88504073	254.102	374.483	-0.559495	0.0004	0.00878381
ENSMUST00000020255	ENSMUSG00000020062	Slc5a8	chr10:88885991-88929505	79.2654	121.489	-0.61606	5e-05	0.00141417
ENSMUST00000020258	ENSMUSG00000020064	Herc4	chr10:63243796-63317881	15.5291	28.7859	-0.890388	5e-05	0.00141417
ENSMUST00000029671	ENSMUSG00000028037	Ifi44	chr3:151730921-151749960	3.08024	4.93644	-0.680427	5e-05	0.00141417
ENSMUST00000032441	ENSMUSG00000030301	Ccdc91	chr6:147475827-147632612	22.6736	33.0264	-0.54261	5e-05	0.00141417
ENSMUST00000052725	ENSMUSG00000032018	Sc5d	chr9:42254176-42264300	15.2392	30.744	-1.01252	5e-05	0.00141417
ENSMUST00000001562	ENSMUSG00000001521	Tulp3	chr6:128321160-128355851	12.7489	16.7725	-0.395718	0.0006	0.0124324
ENSMUST00000031239	ENSMUSG00000029299	Abcg3	chr5:104935056-104982718	0.105841	0.355375	-1.74744	0.0005	0.0106375
ENSMUST00000039742	ENSMUSG00000035878	Hykk	chr9:54917282-54949924	85.2464	143.923	-0.755583	5e-05	0.00141417
ENSMUST00000102602	ENSMUSG00000049299	Trappc1	chr11:69323979-69325793	19.9815	29.3302	-0.553717	0.00145	0.0257185
ENSMUST00000084881	ENSMUSG00000032431	Crtap	chr9:114375133-114390675	14.0251	23.4519	-0.74169	5e-05	0.00141417
ENSMUST00000042290	ENSMUSG00000037254	Itih2	chr2:10094592-10131396	0.461961	1.71944	-1.89609	5e-05	0.00141417
ENSMUST00000080995	ENSMUSG00000060044	Tmem26	chr10:68723745-68782654	4.64244	7.11481	-0.615943	5e-05	0.00141417
ENSMUST00000117137	ENSMUSG00000023914	Mep1a	chr17:43474323-43502812	144.041	352.525	-1.29125	5e-05	0.00141417
ENSMUST00000062723	ENSMUSG00000032561	Acpp	chr9:104288315-104337728	1.71502	2.45376	-0.516767	0.0009	0.0174274
ENSMUST00000053640	ENSMUSG00000045730	Adrb2	chr18:62177816-62179959	2.69878	6.03941	-1.1621	5e-05	0.00141417
ENSMUST00000025215	ENSMUSG00000024357	Sil1	chr18:35266399-35498925	23.1496	31.41	-0.440237	0.00015	0.00378624
ENSMUST00000106178	ENSMUSG00000042988	Notum	chr11:120653787-120661175	4.67152	6.71542	-0.523585	0.00015	0.00378624
ENSMUST00000006893	ENSMUSG00000006711	D130043K22Rik	chr13:24845134-24901270	0.235486	0.397338	-0.754724	0.0032	0.0487735
ENSMUST00000098371	ENSMUSG00000025790	Slco3a1	chr7:74275418-74554780	26.2703	39.119	-0.574437	0.00115	0.0213015
ENSMUST00000065634	ENSMUSG00000053303	Slc22a26	chr19:7781040-7802667	0.349437	5.93025	-4.08499	5e-05	0.00141417
ENSMUST00000159899	ENSMUSG00000039047	Pigk	chr3:152714099-152789026	7.80221	10.444	-0.420722	0.00175	0.0300127
ENSMUST00000043285	ENSMUSG00000040978	Gm11992	chr11:8993136-9069356	14.8694	21.3752	-0.523594	0.00295	0.0455823
ENSMUST00000129281	ENSMUSG00000034593	Myo5a	chr9:75071187-75223688	1.23287	6.53872	-2.40699	0.0025	0.0401043
ENSMUST00000108926	ENSMUSG00000074519	Etohi1	chr2:178023283-178034022	8.81289	12.7582	-0.533738	0.0008	0.0157593
ENSMUST00000028619	ENSMUSG00000027195	Hsd17b12	chr2:94032688-94157964	35.3111	46.778	-0.405711	0.00025	0.00588258
ENSMUST00000029568	ENSMUSG00000027956	Tmem144	chr3:79812563-79852773	5.17009	8.27481	-0.678538	5e-05	0.00141417
ENSMUST00000099705	ENSMUSG00000075033	Nxpe3	chr16:55839952-55895279	2.35464	5.38829	-1.19432	5e-05	0.00141417
ENSMUST00000006785	ENSMUSG00000021335	Slc17a1	chr13:23867749-23895730	68.2411	125.471	-0.878643	5e-05	0.00141417
ENSMUST00000033463	ENSMUSG00000031129	Slc9a9	chr9:94669908-95230445	0.323805	0.732525	-1.17775	5e-05	0.00141417
ENSMUST00000045008	ENSMUSG00000033634	Cml2	chr6:85865421-85869158	13.9415	22.1918	-0.670649	5e-05	0.00141417
ENSMUST00000028949	ENSMUSG00000027455	Nsfl1c	chr2:151494181-151511414	51.7883	69.8677	-0.431999	0.0001	0.00265335
ENSMUST00000078090	ENSMUSG00000028496	Mllt3	chr4:87769924-88033364	1.21807	2.37752	-0.96486	5e-05	0.00141417
ENSMUST00000033818	ENSMUSG00000031441	Atp11a	chr8:12757013-12868728	27.4132	101.733	-1.89184	5e-05	0.00141417
ENSMUST00000034623	ENSMUSG00000032112	Trappc4	chr9:44403760-44407548	20.4992	26.7729	-0.385207	0.00265	0.0420006
ENSMUST00000062684	ENSMUSG00000043252	Tmem64	chr4:15265830-15286753	37.5821	62.8184	-0.741143	5e-05	0.00141417
ENSMUST00000053771	ENSMUSG00000036879	Phkb	chr8:85841001-86061376	12.0587	18.2929	-0.601208	5e-05	0.00141417
ENSMUST00000057855	ENSMUSG00000043251	Exoc3l	chr8:105289923-105296098	0.370849	0.729497	-0.976069	0.00055	0.0115424
ENSMUST00000046916	ENSMUSG00000037725	Ckap2	chr8:22168151-22185819	0.242799	0.525916	-1.11507	0.0008	0.0157593
ENSMUST00000195014	ENSMUSG00000041355	Ssr2	chr3:88575875-88588419	53.4268	68.2162	-0.352551	0.0018	0.0306903
ENSMUST00000092584	ENSMUSG00000069662	Marcks	chr10:37133374-37138920	5.81682	9.47934	-0.704556	5e-05	0.00141417
ENSMUST00000090678	ENSMUSG00000068798	Rap1a	chr3:105727266-105801336	19.7071	25.1598	-0.352409	0.0025	0.0401043
ENSMUST00000087867	ENSMUSG00000073016	Uprt	chrX:104482817-104507490	2.41013	3.4706	-0.526076	0.0011	0.020454
ENSMUST00000058692	ENSMUSG00000032006	Pdgfd	chr9:6168611-6378843	2.03965	6.25796	-1.61737	5e-05	0.00141417
ENSMUST00000060092	ENSMUSG00000043241	Upf2	chr2:5951468-6056703	8.13599	12.1096	-0.573759	5e-05	0.00141417
ENSMUST00000023835	ENSMUSG00000023073	Slc10a2	chr8:5085622-5105232	14.2128	22.1223	-0.638311	5e-05	0.00141417
ENSMUST00000034787	ENSMUSG00000032253	Phip	chr9:82866158-82975516	7.10188	8.9574	-0.334878	0.00265	0.0420006
ENSMUST00000034564	ENSMUSG00000032062	2310030G06Rik	chr9:50739690-50746521	24.9691	41.3001	-0.726003	5e-05	0.00141417
ENSMUST00000034878	ENSMUSG00000032328	Tmem30a	chr9:79768942-79793507	60.0071	87.3863	-0.542275	5e-05	0.00141417
ENSMUST00000098663	ENSMUSG00000074261	Erich4	chr7:25614619-25615892	44.0957	67.2314	-0.608497	5e-05	0.00141417
ENSMUST00000048032	ENSMUSG00000032758	Kap	chr6:133849850-133853762	5249.12	38668.2	-2.881	5e-05	0.00141417
ENSMUST00000071370	ENSMUSG00000035566	Pcdh17	chr14:84443562-84537060	7.40872	9.74054	-0.394777	0.0003	0.00690244
ENSMUST00000031841	ENSMUSG00000029817	Tra2a	chr6:49243923-49264030	8.61889	14.1656	-0.716818	5e-05	0.00141417
ENSMUST00000027824	ENSMUSG00000026542	Apcs	chr1:172893960-172895041	0.215202	0.865812	-2.00836	0.0018	0.0306903
ENSMUST00000081769	ENSMUSG00000034488	Edil3	chr13:88821471-89323223	0.315258	0.732511	-1.21632	0.00105	0.019753
ENSMUST00000040962	ENSMUSG00000034875	Nudt19	chr7:35547184-35556304	142.163	231.871	-0.705777	5e-05	0.00141417
ENSMUST00000082235	ENSMUSG00000024313	Mep1b	chr18:21072343-21100199	7.38993	46.5299	-2.65452	5e-05	0.00141417
ENSMUST00000036236	ENSMUSG00000038388	Mpp6	chr6:50110240-50263862	26.9771	43.2931	-0.682401	0.00015	0.00378624
ENSMUST00000059449	ENSMUSG00000050097	Ces2b	chr8:104831571-104840093	0.307087	4.58207	-3.89928	5e-05	0.00141417
ENSMUST00000131475	ENSMUSG00000002797	Ggct	chr6:54982579-54992950	2.81606	8.40237	-1.57712	5e-05	0.00141417
ENSMUST00000030169	ENSMUSG00000028455	Stoml2	chr4:43027689-43031710	20.7431	27.1338	-0.38746	0.00265	0.0420006
ENSMUST00000113516	ENSMUSG00000062960	Kdr	chr5:75932826-75978458	19.8807	25.2262	-0.343557	0.0015	0.0264906
ENSMUST00000112460	ENSMUSG00000033610	Pank1	chr19:34810893-34879455	47.9247	106.043	-1.14581	5e-05	0.00141417
ENSMUST00000096363	ENSMUSG00000071719	Tmem28	chrX:99821020-99848790	0.370602	0.62626	-0.756892	0.00205	0.0341843
ENSMUST00000117513	ENSMUSG00000020100	Slc29a3	chr10:60712071-60752782	27.2054	36.5174	-0.424693	0.00015	0.00378624
ENSMUST00000022901	ENSMUSG00000022292	Rrm2b	chr15:37923951-37961318	8.6463	11.7036	-0.436798	0.0002	0.00485099
ENSMUST00000022317	ENSMUSG00000021792	Fam213a	chr14:40993739-41013788	36.8883	53.9245	-0.547776	0.00015	0.00378624
ENSMUST00000074127	ENSMUSG00000010025	Aldh3a2	chr11:61223416-61267185	57.7543	108.002	-0.903058	5e-05	0.00141417
ENSMUST00000022861	ENSMUSG00000072664	Ugt3a1	chr15:9279828-9315032	99.6574	209.874	-1.07448	5e-05	0.00141417
ENSMUST00000106529	ENSMUSG00000030935	Acsm3	chr7:119760922-119848943	0.408337	4.29936	-3.39629	5e-05	0.00141417
ENSMUST00000030986	ENSMUSG00000029103	Lrpap1	chr5:35091500-35105766	109.642	155.736	-0.506312	5e-05	0.00141417
ENSMUST00000106527	ENSMUSG00000030935	Acsm3	chr7:119760922-119848943	4.72954	77.4256	-4.03304	5e-05	0.00141417
ENSMUST00000009003	ENSMUSG00000008859	Rala	chr13:17880574-17944239	15.2584	19.8528	-0.379739	0.00075	0.0149651
ENSMUST00000021772	ENSMUSG00000021339	Mrs2	chr13:24992482-25020379	15.4986	20.4158	-0.397545	0.00075	0.0149651
ENSMUST00000022450	ENSMUSG00000040651	Fam208a	chr14:27428846-27508460	14.5396	20.9439	-0.526545	5e-05	0.00141417
ENSMUST00000051594	ENSMUSG00000021697	Depdc1b	chr13:108316331-108389585	5.21455	9.78969	-0.908721	5e-05	0.00141417
ENSMUST00000034547	ENSMUSG00000032047	Acat1	chr9:53580521-53610382	138.628	245.402	-0.823929	5e-05	0.00141417
ENSMUST00000003720	ENSMUSG00000003623	Crot	chr5:8966032-8997324	61.2797	146.374	-1.25618	5e-05	0.00141417
ENSMUST00000023344	ENSMUSG00000022664	Slc35a5	chr16:45139572-45158706	13.3402	17.1126	-0.35928	0.00205	0.0341843
ENSMUST00000089925	ENSMUSG00000022861	Dgkg	chr16:22468460-22657221	1.60924	2.91573	-0.857475	0.0001	0.00265335
ENSMUST00000093207	ENSMUSG00000069917	Hba-a2	chr11:32296488-32297298	1.37967	10.2264	-2.8899	5e-05	0.00141417
ENSMUST00000076891	ENSMUSG00000024982	Zdhhc6	chr19:55298300-55316032	24.7691	31.6811	-0.355082	0.00145	0.0257185
ENSMUST00000021574	ENSMUSG00000021149	Gtpbp4	chr13:8972070-8996017	13.5313	17.9	-0.403659	0.00075	0.0149651
ENSMUST00000034304	ENSMUSG00000031844	Hsd17b2	chr8:117701945-117759029	0.868938	7.66814	-3.14155	5e-05	0.00141417
ENSMUST00000025472	ENSMUSG00000024579	Pcyox1l	chr18:61696836-61707635	1.31805	2.38968	-0.85841	5e-05	0.00141417
ENSMUST00000022120	ENSMUSG00000021620	Acot12	chr13:91461049-91786148	48.6135	89.2531	-0.876546	5e-05	0.00141417
ENSMUST00000079869	ENSMUSG00000058446	Znrf2	chr6:54816915-54893500	25.1957	45.5444	-0.854099	5e-05	0.00141417
ENSMUST00000050952	ENSMUSG00000047963	Stbd1	chr5:92603040-92606579	1.5891	4.08218	-1.36113	5e-05	0.00141417
ENSMUST00000061506	ENSMUSG00000036019	Tmtc2	chr10:105187662-105574435	0.254337	0.437152	-0.781392	0.00125	0.0228388
ENSMUST00000028769	ENSMUSG00000027303	Ptpra	chr2:130450277-130554026	28.792	39.8787	-0.469948	0.0001	0.00265335
ENSMUST00000056449	ENSMUSG00000048865	Arhgap30	chr1:171388953-171410240	0.54079	0.936652	-0.792445	0.00015	0.00378624
ENSMUST00000116380	ENSMUSG00000027642	Rpn2	chr2:157208549-157326319	46.7504	58.6952	-0.328264	0.0029	0.0449794
ENSMUST00000117160	ENSMUSG00000031841	Cdh13	chr8:118283732-119324921	0.527141	1.14074	-1.11371	5e-05	0.00141417
ENSMUST00000194558	ENSMUSG00000027782	Kpna4	chr3:69067148-69127113	16.4479	24.057	-0.548556	0.0002	0.00485099
ENSMUST00000167746	ENSMUSG00000016756	Cmah	chr13:24327419-24477285	7.36712	9.41413	-0.353727	0.0019	0.0321013
ENSMUST00000028167	ENSMUSG00000026827	Gpd2	chr2:57236226-57370719	11.661	17.2143	-0.561916	5e-05	0.00141417
ENSMUST00000030299	ENSMUSG00000052520	Cyp2j5	chr4:96628772-96664154	627.756	907.986	-0.532466	0.0001	0.00265335
ENSMUST00000112852	ENSMUSG00000057315	Arhgap24	chr5:102481390-102897937	39.4141	53.3144	-0.435811	0.00325	0.0493611
ENSMUST00000198584	ENSMUSG00000050315	Synpo2	chr3:123076518-123236147	0.491564	0.890529	-0.857284	0.0002	0.00485099
ENSMUST00000018186	ENSMUSG00000018042	Cyb5r3	chr15:83153493-83172592	46.4832	71.1747	-0.614656	5e-05	0.00141417
ENSMUST00000040454	ENSMUSG00000035759	Bbs10	chr10:111298678-111301736	1.28589	1.92423	-0.58151	0.00165	0.0286638
ENSMUST00000109221	ENSMUSG00000017929	B4galt5	chr2:167298443-167349183	13.8033	37.6117	-1.44617	5e-05	0.00141417
ENSMUST00000109225	ENSMUSG00000040413	Timd2	chr11:46668959-46707061	23.7511	52.8639	-1.15429	5e-05	0.00141417
ENSMUST00000027053	ENSMUSG00000025921	Rdh10	chr1:16105773-16133734	9.71556	14.7271	-0.600103	5e-05	0.00141417
ENSMUST00000027056	ENSMUSG00000048960	Prex2	chr1:10993464-11303681	4.46624	5.87813	-0.396295	0.0005	0.0106375
ENSMUST00000055698	ENSMUSG00000046352	Gjb2	chr14:57098599-57104702	26.0294	48.5664	-0.899819	5e-05	0.00141417
ENSMUST00000079081	ENSMUSG00000024411	Aqp4	chr18:15389393-15403684	5.44182	15.9884	-1.55486	5e-05	0.00141417
ENSMUST00000031264	ENSMUSG00000029322	Plac8	chr5:100553724-100572245	7.68553	11.7463	-0.611995	0.0011	0.020454
ENSMUST00000031195	ENSMUSG00000035780	Ugt2a3	chr5:87324971-87337195	0.463699	0.939195	-1.01824	0.00075	0.0149651
ENSMUST00000027931	ENSMUSG00000026622	Nek2	chr1:191821443-191833050	0.877987	1.72907	-0.977722	5e-05	0.00141417
ENSMUST00000065917	ENSMUSG00000058799	Nap1l1	chr10:111473191-111498142	42.2392	67.7836	-0.682353	0.0001	0.00265335
ENSMUST00000090095	ENSMUSG00000022307	Oxr1	chr15:41447481-41861048	4.34182	6.53688	-0.5903	0.0021	0.034862
ENSMUST00000000049	ENSMUSG00000000049	Apoh	chr11:107933386-108414396	1.9867	5.58255	-1.49055	0.0027	0.0426527
ENSMUST00000187994	ENSMUSG00000075602	Ly6a	chr15:74994876-74998031	150.415	208.256	-0.469409	0.00185	0.031399
ENSMUST00000042081	ENSMUSG00000040552	C3ar1	chr6:122847137-122856161	0.376117	0.620945	-0.723284	0.0011	0.020454
ENSMUST00000141971	ENSMUSG00000022679	Mpv17l	chr16:13903160-13949619	8.52455	28.6525	-1.74897	0.0013	0.0235944
ENSMUST00000100171	ENSMUSG00000026864	Hspa5	chr2:34771969-34777547	117.744	157.467	-0.419393	0.00055	0.0115424
ENSMUST00000029419	ENSMUSG00000027831	Veph1	chr3:66053557-66296837	7.53642	13.0534	-0.792473	5e-05	0.00141417
ENSMUST00000068515	ENSMUSG00000055114	Anxa13	chr15:58341873-58364148	1.82625	3.27816	-0.844003	0.00105	0.019753
ENSMUST00000107256	ENSMUSG00000030559	Rab38	chr7:88430272-88491466	3.76372	7.80948	-1.05307	5e-05	0.00141417
ENSMUST00000010250	ENSMUSG00000024650	Slc22a6	chr19:8617995-8628299	182.878	272.646	-0.576145	5e-05	0.00141417
ENSMUST00000034243	ENSMUSG00000031790	Mmp15	chr8:95352267-95374293	0.314165	0.791062	-1.33227	5e-05	0.00141417
ENSMUST00000084647	ENSMUSG00000030945	Acsm2	chr7:119554468-119600694	1120.04	2425.65	-1.11482	5e-05	0.00141417
ENSMUST00000031445	ENSMUSG00000029482	Aacs	chr5:125475813-125517410	31.0068	69.159	-1.15733	5e-05	0.00141417
ENSMUST00000194649	ENSMUSG00000039221	Rpl22l1	chr3:28805435-28813985	31.0941	44.9088	-0.530358	0.00185	0.031399
ENSMUST00000087605	ENSMUSG00000024300	Myo1f	chr17:33555718-33607762	0.356216	0.778193	-1.12738	5e-05	0.00141417
ENSMUST00000003509	ENSMUSG00000003418	St8sia6	chr2:13651020-13794064	7.24381	11.2179	-0.630981	5e-05	0.00141417
ENSMUST00000031565	ENSMUSG00000029581	Fscn1	chr5:142960342-142973185	1.7075	2.83345	-0.730673	0.00025	0.00588258
ENSMUST00000103035	ENSMUSG00000016940	Kctd2	chr11:115420127-115431274	11.1097	15.7546	-0.503955	0.0001	0.00265335
ENSMUST00000022916	ENSMUSG00000022305	Lrp12	chr15:39870602-39943994	2.19554	4.69069	-1.09522	0.0003	0.00690244
ENSMUST00000073456	ENSMUSG00000060739	Nsa2	chr13:97067286-97137926	31.9797	40.0313	-0.323973	0.00305	0.0468446
ENSMUST00000096431	ENSMUSG00000053852	Adgrg4	chrX:56870162-57001558	2.23688	5.50596	-1.2995	5e-05	0.00141417
ENSMUST00000044634	ENSMUSG00000035472	Slc25a21	chr12:56691766-57197472	7.22738	11.9416	-0.724448	5e-05	0.00141417
ENSMUST00000086763	ENSMUSG00000004730	Adgre1	chr17:57358685-57483529	0.802066	1.68647	-1.07221	5e-05	0.00141417
ENSMUST00000028332	ENSMUSG00000026958	Dpp7	chr2:25352289-25356359	24.1207	40.3452	-0.742128	5e-05	0.00141417
ENSMUST00000030535	ENSMUSG00000028755	Cda	chr4:138338527-138367992	171.441	220.871	-0.365492	0.0009	0.0174274
ENSMUST00000107022	ENSMUSG00000063730	Hsd3b2	chr3:98709254-98724543	54.8637	85.36	-0.637708	5e-05	0.00141417
ENSMUST00000032824	ENSMUSG00000030603	Psmc4	chr7:28041706-28050101	48.0222	63.7871	-0.409565	0.00025	0.00588258
ENSMUST00000110675	ENSMUSG00000079103	Tgm7	chr2:121093564-121109795	0.0810275	0.364039	-2.16761	0.0013	0.0235944
ENSMUST00000055408	ENSMUSG00000041609	Ccdc64	chr5:115648174-115731621	4.13585	6.66479	-0.688376	5e-05	0.00141417
ENSMUST00000119284	ENSMUSG00000024070	Prkd3	chr17:78949404-79020816	4.26955	7.64728	-0.840864	0.00035	0.00785859
ENSMUST00000192462	ENSMUSG00000028199	Cryz	chr3:154576430-154623182	82.6444	133.863	-0.695772	0.0002	0.00485099
ENSMUST00000045748	ENSMUSG00000035232	Pdk3	chrX:93764606-93832201	14.0291	32.6818	-1.22006	5e-05	0.00141417
ENSMUST00000120381	ENSMUSG00000032116	Stt3a	chr9:36729343-36767679	18.263	22.9758	-0.331194	0.00195	0.0327838
ENSMUST00000002883	ENSMUSG00000021319	Sfrp4	chr13:19623174-19632821	0.101865	0.382914	-1.91036	0.0031	0.0474879
ENSMUST00000002885	ENSMUSG00000002808	Epdr1	chr13:19591708-19619830	6.58605	8.73624	-0.407599	0.00165	0.0286638
ENSMUST00000084770	ENSMUSG00000055373	Fut9	chr4:25609331-25800244	97.1992	143.613	-0.563167	5e-05	0.00141417
ENSMUST00000172693	ENSMUSG00000024397	Aif1	chr17:35170990-35176001	0.946645	2.48861	-1.39445	0.00215	0.0355551
ENSMUST00000080322	ENSMUSG00000052776	Oas1a	chr5:120896255-120907521	0.667636	1.21522	-0.864085	0.0007	0.0141397
ENSMUST00000038665	ENSMUSG00000041552	Ptchd1	chrX:155573454-155623325	0.212451	1.74211	-3.03563	5e-05	0.00141417
ENSMUST00000029326	ENSMUSG00000027762	Sucnr1	chr3:60081868-60087566	21.1621	43.4637	-1.03833	5e-05	0.00141417
ENSMUST00000032800	ENSMUSG00000030579	Tyrobp	chr7:30413787-30417577	6.34866	12.7133	-1.00182	5e-05	0.00141417
ENSMUST00000062991	ENSMUSG00000024580	Grpel2	chr18:61712439-61726331	13.4028	17.0305	-0.345586	0.0021	0.034862
ENSMUST00000039697	ENSMUSG00000033676	Gabrb3	chr7:57407671-57828802	5.23766	7.42256	-0.502995	0.0001	0.00265335
ENSMUST00000031090	ENSMUSG00000029189	Sel1l3	chr5:53107082-53213452	15.7814	21.1179	-0.420237	5e-05	0.00141417
ENSMUST00000031093	ENSMUSG00000029193	Cckar	chr5:53697775-53707705	13.0573	37.42	-1.51896	5e-05	0.00141417
ENSMUST00000022718	ENSMUSG00000022122	Ednrb	chr14:103814624-103844173	1.74194	4.61362	-1.40521	0.0005	0.0106375
ENSMUST00000070522	ENSMUSG00000032374	Plod2	chr9:92542222-92608428	6.90119	10.9002	-0.659438	5e-05	0.00141417
ENSMUST00000047405	ENSMUSG00000022488	Nckap1l	chr15:103453824-103498800	0.90787	1.65542	-0.866635	5e-05	0.00141417
ENSMUST00000077290	ENSMUSG00000025823	Pdia4	chr6:47796140-47813430	48.9865	67.4508	-0.461452	5e-05	0.00141417
ENSMUST00000001452	ENSMUSG00000001416	Cct3	chr3:88297115-88321767	47.8731	61.881	-0.37028	0.00045	0.009687
ENSMUST00000112121	ENSMUSG00000048578	Mlec	chr5:115142980-115158179	99.1399	155.169	-0.646299	5e-05	0.00141417
ENSMUST00000042167	ENSMUSG00000039007	Cpq	chr15:33083128-33594552	48.0781	66.0063	-0.457226	5e-05	0.00141417
ENSMUST00000078386	ENSMUSG00000045871	Slitrk6	chr14:110748577-110755149	0.16471	1.4668	-3.15467	5e-05	0.00141417
ENSMUST00000022995	ENSMUSG00000022366	Slc22a22	chr15:57243766-57477625	46.3723	95.6096	-1.04389	5e-05	0.00141417
ENSMUST00000061156	ENSMUSG00000035376	Hacd2	chr16:35022420-35109175	15.4066	20.446	-0.408271	0.0001	0.00265335
ENSMUST00000024031	ENSMUSG00000023262	Acy1	chr9:106432980-106438319	47.6107	77.2745	-0.698705	5e-05	0.00141417
ENSMUST00000038574	ENSMUSG00000042426	Dhx29	chr13:112927729-112969431	5.40144	8.82422	-0.708124	5e-05	0.00141417
ENSMUST00000029515	ENSMUSG00000027907	S100a11	chr3:93520487-93526287	134.147	174.438	-0.378903	0.001	0.0189868
ENSMUST00000061937	ENSMUSG00000028189	Ctbs	chr3:146450469-146499753	20.5816	32.682	-0.667144	5e-05	0.00141417
ENSMUST00000054030	ENSMUSG00000024866	Acy3	chr19:3986660-3990007	264.622	974.515	-1.88075	5e-05	0.00141417
ENSMUST00000049323	ENSMUSG00000042660	Wdr55	chr18:36760238-36766198	15.8472	24.2402	-0.613175	5e-05	0.00141417
ENSMUST00000122328	ENSMUSG00000020674	Pxdn	chr12:29938035-30017658	3.44818	4.91501	-0.511359	5e-05	0.00141417
ENSMUST00000064873	ENSMUSG00000035031	C8a	chr4:104815678-104876398	0.673234	3.48721	-2.37289	5e-05	0.00141417
ENSMUST00000121146	ENSMUSG00000060985	Tdrd5	chr1:156255295-156303664	0.494595	0.871716	-0.81761	0.00155	0.0272269
ENSMUST00000039026	ENSMUSG00000037010	Apln	chrX:48025145-48034853	0.664696	2.34584	-1.81934	5e-05	0.00141417
ENSMUST00000187510	ENSMUSG00000046159	Chrm3	chr13:9875485-10360844	0.460604	1.52446	-1.7267	5e-05	0.00141417
ENSMUST00000043069	ENSMUSG00000018008	Cyth4	chr15:78597046-78622019	1.09114	1.67457	-0.61796	0.00185	0.031399
ENSMUST00000070918	ENSMUSG00000022235	Cmbl	chr15:31568790-31590119	158.865	200.838	-0.338224	0.00255	0.0407945
ENSMUST00000079691	ENSMUSG00000027610	Gss	chr2:155490378-155592810	95.6057	144.964	-0.600523	0.00045	0.009687
ENSMUST00000072519	ENSMUSG00000041112	Elmo1	chr13:20090618-20606528	0.909561	1.48241	-0.704706	0.00025	0.00588258
ENSMUST00000046743	ENSMUSG00000033488	BC026585	chr1:157458576-157489060	103.631	143.565	-0.470251	5e-05	0.00141417
ENSMUST00000164192	ENSMUSG00000071042	Rasgrp3	chr17:75435904-75529043	2.27367	3.57024	-0.650997	5e-05	0.00141417
ENSMUST00000111063	ENSMUSG00000016386	Mpped2	chr2:106693268-106868356	1.02437	2.76188	-1.43091	5e-05	0.00141417
ENSMUST00000033310	ENSMUSG00000031004	Mki67	chr7:135689787-135716379	0.928654	1.62925	-0.810995	5e-05	0.00141417
ENSMUST00000045154	ENSMUSG00000037731	Themis2	chr4:132781842-132796387	0.486208	0.81611	-0.74719	0.0019	0.0321013
ENSMUST00000028278	ENSMUSG00000026914	Psmd14	chr2:61711693-61800376	29.0448	38.9273	-0.422499	0.0001	0.00265335
ENSMUST00000033053	ENSMUSG00000030789	Itgax	chr7:128129546-128150657	0.409804	0.902288	-1.13865	5e-05	0.00141417
ENSMUST00000031655	ENSMUSG00000029650	Slc46a3	chr5:147878436-147894815	9.96349	15.669	-0.653185	5e-05	0.00141417
ENSMUST00000115571	ENSMUSG00000024431	Nr3c1	chr18:39410544-39491301	20.1317	28.4229	-0.497588	0.0032	0.0487735
ENSMUST00000041252	ENSMUSG00000042647	Acad12	chr5:121596774-121618938	3.10941	4.43312	-0.511682	0.00055	0.0115424
ENSMUST00000081790	ENSMUSG00000033417	Cacul1	chr19:60524695-60581023	17.7924	23.8048	-0.419987	0.00035	0.00785859
ENSMUST00000021970	ENSMUSG00000021508	Cxcl14	chr13:56288646-56296551	1.30215	2.10173	-0.690682	0.00145	0.0257185
ENSMUST00000046831	ENSMUSG00000040883	Tmem205	chr9:21921009-21935872	37.2274	59.11	-0.667037	5e-05	0.00141417
ENSMUST00000035929	ENSMUSG00000038704	Aspdh	chr7:44465390-44467758	31.3782	52.7057	-0.748197	5e-05	0.00141417
ENSMUST00000062893	ENSMUSG00000045328	Cenpe	chr3:135212536-135273611	0.28767	0.583984	-1.02152	5e-05	0.00141417
ENSMUST00000030408	ENSMUSG00000028655	Mfsd2a	chr4:122946849-122961188	1.58129	10.8162	-2.77402	5e-05	0.00141417
ENSMUST00000024707	ENSMUSG00000023914	Mep1a	chr17:43474323-43502812	136.26	263.513	-0.951512	5e-05	0.00141417
ENSMUST00000018963	ENSMUSG00000018819	Lsp1	chr7:142460808-142516008	0.227997	1.07373	-2.23554	5e-05	0.00141417
ENSMUST00000169314	ENSMUSG00000058258	Idi1	chr13:8885500-8892451	10.1665	46.321	-2.18784	5e-05	0.00141417
ENSMUST00000068110	ENSMUSG00000029108	Pcdh7	chr5:57717966-58133230	1.16292	1.94359	-0.740969	0.00025	0.00588258
ENSMUST00000069792	ENSMUSG00000002881	Nab1	chr1:52457293-52500679	12.6965	17.147	-0.433529	0.00065	0.0133036
ENSMUST00000095266	ENSMUSG00000040258	Nxph4	chr10:127525472-127534559	0.634294	1.22782	-0.952872	0.0006	0.0124324
ENSMUST00000162735	ENSMUSG00000021187	Tc2n	chr12:101645442-101718523	0.387926	2.62644	-2.75926	5e-05	0.00141417
ENSMUST00000076463	ENSMUSG00000041762	Gpr155	chr2:73341505-73386572	3.14997	4.37744	-0.47475	0.0003	0.00690244
ENSMUST00000107591	ENSMUSG00000030498	Gas2	chr7:51862426-51994458	123.893	206.015	-0.733662	5e-05	0.00141417
ENSMUST00000020238	ENSMUSG00000020048	Hsp90b1	chr10:86685600-86705509	163.071	210.882	-0.370938	0.00135	0.0242813
ENSMUST00000001507	ENSMUSG00000001467	Cyp51	chr5:3928177-4104746	14.6821	79.4606	-2.43618	5e-05	0.00141417
ENSMUST00000028384	ENSMUSG00000027001	Dusp19	chr2:80617044-80631661	2.8442	4.30592	-0.598299	0.00065	0.0133036
ENSMUST00000028389	ENSMUSG00000027004	Frzb	chr2:80411969-80447625	1.34432	6.18955	-2.20296	5e-05	0.00141417
ENSMUST00000031251	ENSMUSG00000029311	Hsd17b11	chr5:103989761-104021919	68.9318	272.736	-1.98427	5e-05	0.00141417
ENSMUST00000031254	ENSMUSG00000029312	Klhl8	chr5:103861972-103911259	2.54098	3.52579	-0.472561	0.0014	0.0250158
ENSMUST00000168841	ENSMUSG00000049103	Ccr2	chr9:124101949-124113557	0.142637	0.491477	-1.78477	0.0001	0.00265335
ENSMUST00000034022	ENSMUSG00000031609	Sap30	chr8:57482706-57487860	23.036	61.9259	-1.42665	5e-05	0.00141417
ENSMUST00000034021	ENSMUSG00000031608	Galnt7	chr8:57523827-57653031	2.61132	4.63899	-0.82903	5e-05	0.00141417
ENSMUST00000034026	ENSMUSG00000031613	Hpgd	chr8:56294551-56321046	2.62	4.50699	-0.782601	0.0001	0.00265335
ENSMUST00000058845	ENSMUSG00000045763	Basp1	chr15:25363284-25413764	0.533287	1.02955	-0.949033	0.00085	0.0165966
ENSMUST00000176030	ENSMUSG00000024921	Smarca2	chr19:26605114-26823907	9.23344	31.6125	-1.77556	5e-05	0.00141417
ENSMUST00000167107	ENSMUSG00000055240	Zfp101	chr17:33380178-33394641	3.20798	5.10441	-0.670079	0.00015	0.00378624
ENSMUST00000111350	ENSMUSG00000026670	Uap1	chr1:170141937-170174957	27.1481	45.5361	-0.746159	5e-05	0.00141417
ENSMUST00000110413	ENSMUSG00000021335	Slc17a1	chr13:23867749-23895730	167.547	225.865	-0.430893	0.0025	0.0401043
ENSMUST00000068322	ENSMUSG00000054986	Sec14l3	chr11:4064840-4077736	0.132482	2.68915	-4.34328	5e-05	0.00141417
ENSMUST00000091829	ENSMUSG00000033499	Larp4b	chr13:9093880-9174451	21.9853	30.1958	-0.45781	0.0006	0.0124324
ENSMUST00000120990	ENSMUSG00000051041	Olfml1	chr7:107567445-107591094	3.24001	4.85403	-0.583187	0.0006	0.0124324
ENSMUST00000002298	ENSMUSG00000002228	Ppm1j	chr3:104781055-104786018	0.259759	0.579559	-1.15778	0.00245	0.0394568
ENSMUST00000007249	ENSMUSG00000007034	Slc44a4	chr17:34914469-34930436	39.8457	56.6951	-0.508801	5e-05	0.00141417
ENSMUST00000022176	ENSMUSG00000021670	Hmgcr	chr13:96648966-96670936	7.21723	12.2335	-0.761322	5e-05	0.00141417
ENSMUST00000105917	ENSMUSG00000000154	Slc22a18	chr7:143473735-143499334	185.355	258.628	-0.480582	5e-05	0.00141417
ENSMUST00000039317	ENSMUSG00000038540	Tmc3	chr7:83584930-83625614	0.370647	0.602852	-0.701761	0.00085	0.0165966
ENSMUST00000079400	ENSMUSG00000037686	Aspg	chr12:112106682-112127573	7.12834	14.0822	-0.982238	5e-05	0.00141417
ENSMUST00000062789	ENSMUSG00000044350	Lacc1	chr14:77024199-77036641	0.8745	1.91111	-1.12788	5e-05	0.00141417
ENSMUST00000119993	ENSMUSG00000028152	Tspan5	chr3:138742194-138907905	6.88152	11.8351	-0.782278	5e-05	0.00141417
ENSMUST00000027036	ENSMUSG00000025903	Lypla1	chr1:4807822-4846739	91.0698	157.623	-0.791437	5e-05	0.00141417
ENSMUST00000022239	ENSMUSG00000021725	Parp8	chr13:116854823-117025516	1.57115	3.89207	-1.30871	5e-05	0.00141417
ENSMUST00000010267	ENSMUSG00000010122	Slc47a1	chr11:61343400-61378345	168.849	244.342	-0.533164	5e-05	0.00141417
ENSMUST00000147105	ENSMUSG00000027201	Myef2	chr2:125068123-125123661	1.64279	3.39453	-1.04707	0.00135	0.0242813
ENSMUST00000194134	ENSMUSG00000027820	Mme	chr3:63241536-63386030	10.5927	17.4645	-0.721353	5e-05	0.00141417
ENSMUST00000114468	ENSMUSG00000029822	Osbpl3	chr6:50293329-50456170	7.8696	13.8982	-0.820533	5e-05	0.00141417
ENSMUST00000114466	ENSMUSG00000029822	Osbpl3	chr6:50293329-50456170	5.52967	10.439	-0.916722	0.0027	0.0426527
ENSMUST00000071430	ENSMUSG00000062619	2310039H08Rik	chr17:46772634-46773407	45.8018	65.9215	-0.525346	5e-05	0.00141417
ENSMUST00000163705	ENSMUSG00000038522	AI317395	chr10:40001574-40025268	66.5071	83.9854	-0.336629	0.002	0.0334664
ENSMUST00000085272	ENSMUSG00000039745	Htatip2	chr7:49759105-49773999	6.22905	11.4141	-0.873739	5e-05	0.00141417
ENSMUST00000027559	ENSMUSG00000026321	Tnfrsf11a	chr1:105780717-105847981	0.93541	2.11073	-1.17407	5e-05	0.00141417
ENSMUST00000061673	ENSMUSG00000042284	Itga1	chr13:114958078-115101964	28.2465	36.2622	-0.360397	0.00175	0.0300127
ENSMUST00000144177	ENSMUSG00000025911	Adhfe1	chr1:9547947-9631175	27.73	48.8446	-0.816752	5e-05	0.00141417
ENSMUST00000136731	ENSMUSG00000034593	Myo5a	chr9:75071187-75223688	1.00719	2.55072	-1.34057	0.0001	0.00265335
ENSMUST00000040159	ENSMUSG00000042460	C1galt1	chr6:7844841-7875687	23.3795	29.3472	-0.327977	0.00265	0.0420006
ENSMUST00000178605	ENSMUSG00000000420	Galnt1	chr18:24205343-24286818	43.874	65.5003	-0.578135	5e-05	0.00141417
ENSMUST00000110422	ENSMUSG00000036083	Slc17a3	chr13:23839433-23860714	66.0087	202.559	-1.61762	5e-05	0.00141417
ENSMUST00000161202	ENSMUSG00000013611	Snx31	chr15:36504061-36555573	0.983907	4.89328	-2.31421	5e-05	0.00141417
ENSMUST00000010451	ENSMUSG00000010307	Tmem86a	chr7:47050639-47054776	10.9849	16.9362	-0.624588	5e-05	0.00141417
ENSMUST00000035804	ENSMUSG00000033022	Cdo1	chr18:46713204-46728342	57.6952	74.8295	-0.375156	0.00075	0.0149651
ENSMUST00000052708	ENSMUSG00000048327	Ckap2l	chr2:129268209-129297212	0.272357	0.553044	-1.0219	0.00065	0.0133036
ENSMUST00000024882	ENSMUSG00000024078	Ttc27	chr17:74717749-74863570	4.29446	5.77959	-0.428491	0.00175	0.0300127
ENSMUST00000039721	ENSMUSG00000036083	Slc17a3	chr13:23839433-23860714	24.3217	63.1775	-1.37717	5e-05	0.00141417
ENSMUST00000030568	ENSMUSG00000028780	Sema3c	chr5:17574280-17730268	12.81	26.4982	-1.04863	5e-05	0.00141417
ENSMUST00000102996	ENSMUSG00000021747	4930452B06Rik	chr14:8431191-8666240	0.304542	0.609933	-1.00201	0.0006	0.0124324
ENSMUST00000011400	ENSMUSG00000011256	Adam19	chr11:46055991-46147343	0.444946	0.739449	-0.73282	0.00025	0.00588258
ENSMUST00000077367	ENSMUSG00000028048	Gba	chr3:89202927-89208681	13.9242	19.622	-0.494873	5e-05	0.00141417
ENSMUST00000095458	ENSMUSG00000071180	Smim15	chr13:108046423-108049146	20.4369	27.0317	-0.403478	0.00035	0.00785859
ENSMUST00000095450	ENSMUSG00000071178	Serpina1b	chr12:103728155-103830373	2.84508	9.58924	-1.75295	0.0017	0.0293704
ENSMUST00000006027	ENSMUSG00000005873	Reep5	chr18:34344888-34373415	17.1262	36.4594	-1.09009	5e-05	0.00141417
ENSMUST00000203945	ENSMUSG00000030247	Kcnj8	chr6:142564836-142571614	0.783106	2.42188	-1.62885	5e-05	0.00141417
ENSMUST00000044415	ENSMUSG00000039263	Npepl1	chr2:174110348-174123070	23.666	29.837	-0.334289	0.0032	0.0487735
ENSMUST00000027185	ENSMUSG00000026027	Stradb	chr1:58973521-58995715	10.4145	15.1018	-0.536116	5e-05	0.00141417
ENSMUST00000023538	ENSMUSG00000022836	Mylk	chr16:34784920-35002420	12.0202	15.155	-0.33433	0.0022	0.0361992
ENSMUST00000171376	ENSMUSG00000015474	Ppt2	chr17:34616661-34628510	15.8829	32.6718	-1.04057	5e-05	0.00141417
ENSMUST00000021806	ENSMUSG00000021376	Tpmt	chr13:47025169-47084600	63.5696	103.009	-0.696367	0.0001	0.00265335
ENSMUST00000059588	ENSMUSG00000048371	Pdp2	chr8:104591467-104596836	39.1731	52.1766	-0.413542	0.0002	0.00485099
ENSMUST00000022727	ENSMUSG00000022130	Tgds	chr14:118107830-118132765	6.14084	9.26917	-0.594003	5e-05	0.00141417
ENSMUST00000032843	ENSMUSG00000030614	Tmem126b	chr7:90468193-90476001	19.2886	27.8442	-0.529627	5e-05	0.00141417
ENSMUST00000034148	ENSMUSG00000031712	Il15	chr8:82331636-82403222	5.72765	7.89505	-0.463004	0.0013	0.0235944
ENSMUST00000026917	ENSMUSG00000025810	Nrp1	chr8:128359072-128505462	17.6913	25.6338	-0.535009	5e-05	0.00141417
ENSMUST00000069614	ENSMUSG00000035910	Dcdc2a	chr13:25056003-25210706	0.807523	1.38935	-0.78283	5e-05	0.00141417
ENSMUST00000037499	ENSMUSG00000042670	Immp1l	chr2:105904637-105965558	19.9747	26.5289	-0.409392	0.0021	0.034862
ENSMUST00000070515	ENSMUSG00000022040	Ephx2	chr14:66084376-66124500	161.729	263.706	-0.705356	5e-05	0.00141417
ENSMUST00000049257	ENSMUSG00000020677	Ddx52	chr11:83942061-83963088	13.963	19.9005	-0.511195	5e-05	0.00141417
ENSMUST00000060212	ENSMUSG00000019810	Fuca2	chr10:13499539-13519035	64.0096	94.7198	-0.565378	5e-05	0.00141417
ENSMUST00000096269	ENSMUSG00000052562	Slc22a30	chr19:8335370-8405111	9.88517	47.9561	-2.27838	5e-05	0.00141417
ENSMUST00000044165	ENSMUSG00000039115	Itga9	chr9:118606689-118901003	2.13401	3.263	-0.612631	5e-05	0.00141417
ENSMUST00000103067	ENSMUSG00000018363	Smurf2	chr11:106820065-106920715	10.6749	14.4805	-0.439898	0.0007	0.0141397
ENSMUST00000107772	ENSMUSG00000035495	Tstd2	chr4:46038934-46196311	5.8927	10.0566	-0.771139	5e-05	0.00141417
ENSMUST00000030269	ENSMUSG00000028542	Slc6a9	chr4:117834505-117872554	1.01681	2.32497	-1.19316	5e-05	0.00141417
ENSMUST00000079724	ENSMUSG00000027944	Hax1	chr3:89995445-89998697	41.5589	55.1069	-0.407076	0.0022	0.0361992
ENSMUST00000175646	ENSMUSG00000042410	Agps	chr2:75832176-75931350	12.6792	62.5284	-2.30205	5e-05	0.00141417
ENSMUST00000132974	ENSMUSG00000031441	Atp11a	chr8:12757013-12868728	9.15692	40.6811	-2.15143	5e-05	0.00141417
ENSMUST00000191837	ENSMUSG00000029108	Pcdh7	chr5:57717966-58133230	0.373273	0.705186	-0.917772	0.001	0.0189868
ENSMUST00000069423	ENSMUSG00000027239	Mdk	chr2:91929804-91932297	29.3367	49.0898	-0.742713	5e-05	0.00141417
ENSMUST00000049470	ENSMUSG00000042305	Tmem183a	chr1:134346096-134361979	19.3674	25.6606	-0.405926	5e-05	0.00141417
ENSMUST00000051633	ENSMUSG00000047719	Ubiad1	chr4:148434494-148444771	10.0119	22.1099	-1.14297	5e-05	0.00141417
ENSMUST00000015712	ENSMUSG00000015568	Lpl	chr8:68880490-68906934	44.7723	156.901	-1.80918	5e-05	0.00141417
ENSMUST00000091137	ENSMUSG00000037016	Frem2	chr3:53513937-53657355	1.69245	2.22721	-0.396126	0.00155	0.0272269
ENSMUST00000047095	ENSMUSG00000037780	Mbl1	chr14:41151455-41158959	0.955273	1.84438	-0.94915	0.0025	0.0401043
ENSMUST00000034992	ENSMUSG00000032420	Nt5e	chr9:88327196-88372092	6.92098	11.1899	-0.693146	5e-05	0.00141417
ENSMUST00000121805	ENSMUSG00000024501	Dpysl3	chr18:43320978-43438286	1.64879	2.92249	-0.825791	5e-05	0.00141417
ENSMUST00000040218	ENSMUSG00000038206	Fbxo8	chr8:56551089-56592393	34.6798	44.1326	-0.347751	0.00245	0.0394568
ENSMUST00000171929	ENSMUSG00000026605	Cenpf	chr1:189640605-189688086	0.268934	0.501944	-0.900272	5e-05	0.00141417
ENSMUST00000002502	ENSMUSG00000002428	Hltf	chr3:20057810-20118490	6.86454	10.7123	-0.642036	5e-05	0.00141417
ENSMUST00000102917	ENSMUSG00000028339	Col15a1	chr4:47208160-47313167	2.778	5.12782	-0.884299	5e-05	0.00141417
ENSMUST00000033839	ENSMUSG00000031458	Coprs	chr8:13884787-13890271	9.36887	15.5102	-0.727268	5e-05	0.00141417
ENSMUST00000129100	ENSMUSG00000025089	Gfra1	chr19:58235603-58455909	0.285942	0.666953	-1.22186	0.00095	0.0182319
ENSMUST00000013559	ENSMUSG00000013415	Igf2bp1	chr11:95957162-96005940	0.217046	0.696028	-1.68115	5e-05	0.00141417
ENSMUST00000197758	ENSMUSG00000070368	Prok1	chr3:107230613-107239707	1.78279	8.0964	-2.18314	5e-05	0.00141417
ENSMUST00000069580	ENSMUSG00000055850	Rnf181	chr6:72355446-72366956	170.927	224.774	-0.395097	0.00085	0.0165966
ENSMUST00000025419	ENSMUSG00000024538	Ppic	chr18:53406340-53418007	9.14816	25.4958	-1.47871	5e-05	0.00141417
ENSMUST00000102707	ENSMUSG00000028713	Cyp4b1	chr4:115624724-115647723	575.507	2043.06	-1.82783	5e-05	0.00141417
ENSMUST00000101429	ENSMUSG00000029810	Tmem176b	chr6:48833817-48845869	149.447	271.64	-0.862065	0.00095	0.0182319
ENSMUST00000191436	ENSMUSG00000022587	Ly6e	chr15:74955050-74959905	74.2276	107.108	-0.529042	5e-05	0.00141417
ENSMUST00000019068	ENSMUSG00000018924	Alox15	chr11:70344151-70352031	1.41922	25.7277	-4.18016	5e-05	0.00141417
ENSMUST00000048010	ENSMUSG00000039497	Dse	chr10:34151393-34207551	1.32029	1.85036	-0.48695	0.00235	0.038101
ENSMUST00000051129	ENSMUSG00000046807	Lrrc75b	chr10:75550124-75560330	0.476312	0.870833	-0.87049	0.0001	0.00265335
ENSMUST00000046168	ENSMUSG00000041708	Mpped1	chr15:83779466-83858484	0.311839	0.731997	-1.23104	5e-05	0.00141417
ENSMUST00000122194	ENSMUSG00000021236	Entpd5	chr12:84373856-84409029	59.4107	97.2089	-0.710366	0.0013	0.0235944
ENSMUST00000070756	ENSMUSG00000029778	Adcyap1r1	chr6:55451977-55501451	0.174896	0.368296	-1.07437	0.00025	0.00588258
ENSMUST00000021920	ENSMUSG00000021468	Sptlc1	chr13:53332715-53377365	21.1678	29.2844	-0.468261	5e-05	0.00141417
ENSMUST00000130509	ENSMUSG00000051506	Wdfy4	chr14:32959546-33185508	0.164265	0.574574	-1.80647	5e-05	0.00141417
ENSMUST00000021691	ENSMUSG00000021263	Degs2	chr12:108554719-108702306	12.1039	49.829	-2.04151	5e-05	0.00141417
ENSMUST00000025598	ENSMUSG00000024694	Keg1	chr19:12695785-12721247	433.702	1157.43	-1.41615	5e-05	0.00141417
ENSMUST00000026818	ENSMUSG00000025724	Sec11a	chr7:80907715-80947780	45.9417	63.8265	-0.474353	5e-05	0.00141417
ENSMUST00000030183	ENSMUSG00000028463	Car9	chr4:43505656-43513729	6.87027	10.0447	-0.547997	5e-05	0.00141417
ENSMUST00000113532	ENSMUSG00000055632	Hmcn2	chr2:31314414-31460738	0.448231	0.67543	-0.591563	5e-05	0.00141417
ENSMUST00000053265	ENSMUSG00000046573	Lyrm4	chr13:35978796-36117357	16.7423	22.1341	-0.402775	0.00125	0.0228388
ENSMUST00000018918	ENSMUSG00000018774	Cd68	chr11:69664212-69666153	0.985275	1.94524	-0.981351	0.00025	0.00588258
ENSMUST00000089759	ENSMUSG00000046598	Bdh1	chr16:31422279-31458901	6.7609	31.4773	-2.21902	5e-05	0.00141417
ENSMUST00000000188	ENSMUSG00000000184	Ccnd2	chr6:127125161-127152193	3.0139	4.51474	-0.58301	5e-05	0.00141417
ENSMUST00000051377	ENSMUSG00000043671	Dpy19l3	chr7:35685164-35754454	1.65528	2.20782	-0.415549	0.002	0.0334664
ENSMUST00000033018	ENSMUSG00000030759	Far1	chr7:113513833-113571511	4.29224	13.7361	-1.67817	0.0016	0.0279374
ENSMUST00000025862	ENSMUSG00000024921	Smarca2	chr19:26605114-26823907	20.932	31.5244	-0.590759	0.0011	0.020454
ENSMUST00000123128	ENSMUSG00000034593	Myo5a	chr9:75071187-75223688	0.661352	2.83466	-2.09968	5e-05	0.00141417
ENSMUST00000113733	ENSMUSG00000026172	Bcs1l	chr1:74588288-74592443	4.29463	6.89805	-0.683656	0.0018	0.0306903
ENSMUST00000063465	ENSMUSG00000021994	Wnt5a	chr14:28504749-28527447	0.45029	0.865929	-0.943395	0.00015	0.00378624
ENSMUST00000079644	ENSMUSG00000028639	Ybx1	chr4:119277980-119294604	287.228	375.099	-0.385074	0.0009	0.0174274
ENSMUST00000031281	ENSMUSG00000029338	Antxr2	chr5:97882782-98031043	1.06144	1.62014	-0.6101	0.00135	0.0242813
ENSMUST00000029377	ENSMUSG00000027801	Tm4sf4	chr3:57425313-57441677	0.21985	0.749632	-1.76967	0.00035	0.00785859
ENSMUST00000065289	ENSMUSG00000053063	Clec12a	chr6:129342690-129365303	0.288111	0.68033	-1.23961	0.00065	0.0133036
ENSMUST00000034562	ENSMUSG00000032060	Cryab	chr9:50752757-50756633	23.6309	37.1791	-0.653822	5e-05	0.00141417
ENSMUST00000019965	ENSMUSG00000019822	Smpd2	chr10:41487171-41490340	20.8704	31.324	-0.585809	5e-05	0.00141417
ENSMUST00000090380	ENSMUSG00000039704	Lmbrd2	chr15:9111984-9198318	38.4412	50.0524	-0.380787	0.00045	0.009687
ENSMUST00000090031	ENSMUSG00000068523	Gng5	chr3:146499806-146505572	202.57	257.421	-0.345712	0.0023	0.0374907
ENSMUST00000007559	ENSMUSG00000007415	Gatad1	chr5:3571672-3680325	26.6103	37.7435	-0.504242	0.0033	0.0499537
ENSMUST00000000687	ENSMUSG00000000673	Haao	chr17:83831355-83846790	94.882	143.792	-0.599776	5e-05	0.00141417
ENSMUST00000023531	ENSMUSG00000022831	Hcls1	chr16:36934982-36963212	1.45157	2.44128	-0.750028	0.0001	0.00265335
ENSMUST00000028916	ENSMUSG00000027429	Sec23b	chr2:144556228-144590749	26.0176	39.4098	-0.599064	5e-05	0.00141417
ENSMUST00000089830	ENSMUSG00000068426	Vmn1r19	chr6:57404365-57405483	1.52343	3.58494	-1.23463	5e-05	0.00141417
ENSMUST00000154553	ENSMUSG00000073468	Sft2d1	chr17:8311101-8327442	11.3183	16.6112	-0.553505	0.00015	0.00378624
ENSMUST00000067638	ENSMUSG00000054520	Sh3bp2	chr5:34525837-34563641	1.56138	4.29189	-1.4588	5e-05	0.00141417
ENSMUST00000040647	ENSMUSG00000036585	Fgf1	chr18:38676717-39376284	22.4994	58.5304	-1.3793	5e-05	0.00141417
ENSMUST00000111178	ENSMUSG00000020658	Efr3b	chr12:3962553-4038915	0.15895	0.409559	-1.36549	5e-05	0.00141417
ENSMUST00000040987	ENSMUSG00000038641	Akr1d1	chr6:37515483-37568815	12.9925	17.8947	-0.461852	0.003	0.0461893
ENSMUST00000003569	ENSMUSG00000003477	Inmt	chr6:55170625-55175043	435.966	1071.92	-1.29792	5e-05	0.00141417
ENSMUST00000023762	ENSMUSG00000023021	Cers5	chr15:99734880-99772885	8.92655	14.7145	-0.72106	5e-05	0.00141417
ENSMUST00000042412	ENSMUSG00000040289	Hey1	chr3:8663358-8667256	0.252643	0.591762	-1.22792	0.00025	0.00588258
ENSMUST00000026273	ENSMUSG00000025243	Slc6a20b	chr9:123593822-123632565	64.5052	84.6898	-0.392773	0.0002	0.00485099
ENSMUST00000114840	ENSMUSG00000032011	Thy1	chr9:44043383-44048579	0.28542	0.825095	-1.53147	0.0002	0.00485099
ENSMUST00000088468	ENSMUSG00000043832	Clec4a3	chr6:122952514-122969875	0.285301	1.15779	-2.02082	0.0001	0.00265335
ENSMUST00000063770	ENSMUSG00000030935	Acsm3	chr7:119760922-119848943	4.85015	80.3043	-4.04937	5e-05	0.00141417
ENSMUST00000057944	ENSMUSG00000032854	Ugt8a	chr3:125865270-125938619	31.0284	59.8063	-0.946708	5e-05	0.00141417
ENSMUST00000012627	ENSMUSG00000012483	Rpa3	chr6:8255935-8259173	8.02109	12.3054	-0.617416	0.00075	0.0149651
ENSMUST00000046332	ENSMUSG00000036896	C1qc	chr4:136889803-136893065	7.16927	10.3583	-0.530883	0.00065	0.0133036
ENSMUST00000023243	ENSMUSG00000022579	Gpihbp1	chr15:75596627-75599481	6.40932	11.6978	-0.867995	5e-05	0.00141417
ENSMUST00000060955	ENSMUSG00000027346	Gpcpd1	chr2:132529081-132587729	5.51547	8.22189	-0.575986	0.00025	0.00588258
ENSMUST00000021790	ENSMUSG00000021361	Tmem14c	chr13:41016249-41022575	66.8031	85.1076	-0.349372	0.00195	0.0327838
ENSMUST00000029665	ENSMUSG00000028031	Dkk2	chr3:132085291-132180304	2.55244	4.5596	-0.837029	5e-05	0.00141417
ENSMUST00000059857	ENSMUSG00000051735	Rinl	chr7:28788968-28798963	0.453336	0.889482	-0.972385	0.0001	0.00265335
ENSMUST00000107049	ENSMUSG00000028088	Fmo5	chr3:97628803-97655282	3.84497	12.8339	-1.73891	5e-05	0.00141417
ENSMUST00000066728	ENSMUSG00000053965	Pde5a	chr3:122728946-122859374	1.19743	1.88786	-0.656809	0.0007	0.0141397
ENSMUST00000090302	ENSMUSG00000040640	Erc2	chr14:27622441-28478537	2.51904	5.6059	-1.15407	5e-05	0.00141417
ENSMUST00000091892	ENSMUSG00000069372	Ctxn3	chr18:57468485-57478134	0.116348	2.4759	-4.41143	5e-05	0.00141417
ENSMUST00000048162	ENSMUSG00000040859	Bsdc1	chr4:129461580-129488498	22.1014	29.399	-0.411631	0.00015	0.00378624
ENSMUST00000047761	ENSMUSG00000022132	Cldn10	chr14:118787907-118875489	69.2351	131.023	-0.920249	5e-05	0.00141417
ENSMUST00000028841	ENSMUSG00000027363	Usp8	chr2:126707342-126759297	43.5897	65.0941	-0.578538	5e-05	0.00141417
ENSMUST00000026552	ENSMUSG00000025479	Cyp2e1	chr7:140763738-140774975	724.123	1533.86	-1.08286	5e-05	0.00141417
ENSMUST00000023457	ENSMUSG00000022772	Senp5	chr16:31962505-32003287	5.89848	7.89632	-0.420836	0.0027	0.0426527
ENSMUST00000027380	ENSMUSG00000026188	Tmem169	chr1:72284368-72303104	2.48865	4.39969	-0.822038	5e-05	0.00141417
ENSMUST00000108435	ENSMUSG00000038217	Tlcd2	chr11:75468078-75470899	1.54042	3.97718	-1.36842	5e-05	0.00141417
ENSMUST00000108437	ENSMUSG00000038224	Serpinf2	chr11:75431731-75439591	35.8992	66.9343	-0.898796	5e-05	0.00141417
ENSMUST00000029433	ENSMUSG00000027843	Ptpn22	chr3:103860276-103912247	1.34169	2.22095	-0.727124	0.00015	0.00378624
ENSMUST00000064941	ENSMUSG00000020889	Nr1d1	chr11:98741810-98775333	10.2866	24.3893	-1.24549	5e-05	0.00141417
ENSMUST00000010904	ENSMUSG00000010760	Phlda2	chr7:143501544-143502541	8.04798	14.6322	-0.862445	5e-05	0.00141417
ENSMUST00000075858	ENSMUSG00000057425	Ugt2b37	chr5:87240492-87254804	63.7795	231.035	-1.85695	5e-05	0.00141417
ENSMUST00000044138	ENSMUSG00000037347	Chst7	chrX:20059559-20097521	2.17092	9.89293	-2.18809	5e-05	0.00141417
ENSMUST00000075853	ENSMUSG00000062248	Cks2	chr13:51645231-51650660	34.8341	48.9236	-0.490031	0.0002	0.00485099
ENSMUST00000164566	ENSMUSG00000038528	BC021785	chr10:39946906-39986646	40.9082	73.9287	-0.853744	5e-05	0.00141417
ENSMUST00000087033	ENSMUSG00000067149	Jchain	chr5:88520511-88527891	0.841227	3.46	-2.0402	5e-05	0.00141417
ENSMUST00000019932	ENSMUSG00000019797	1700021F05Rik	chr10:43525120-43540994	25.2419	39.1636	-0.633692	5e-05	0.00141417
ENSMUST00000087883	ENSMUSG00000026043	Col3a1	chr1:45311537-45349706	3.05496	7.03049	-1.20247	5e-05	0.00141417
ENSMUST00000038383	ENSMUSG00000061758	Akr1b10	chr6:34384217-34396950	16.5624	22.567	-0.446304	0.00055	0.0115424
ENSMUST00000038388	ENSMUSG00000034560	A230046K03Rik	chr10:83543940-83596469	13.2191	17.9477	-0.441176	0.00015	0.00378624
ENSMUST00000042498	ENSMUSG00000034088	Hdlbp	chr1:93405939-93478815	62.4392	84.6208	-0.43856	0.00235	0.038101
ENSMUST00000020579	ENSMUSG00000020330	Hmmr	chr11:40701394-40733422	0.326846	0.662438	-1.01918	5e-05	0.00141417
ENSMUST00000070877	ENSMUSG00000022244	Amacr	chr15:10981755-10996624	43.1862	125.031	-1.53365	5e-05	0.00141417
ENSMUST00000021628	ENSMUSG00000021207	Akr1c21	chr13:4574074-4586541	1255.12	1701.51	-0.438993	0.00075	0.0149651
ENSMUST00000056677	ENSMUSG00000046010	Zfp830	chr11:82764344-82765935	15.1378	19.6543	-0.376691	0.0027	0.0426527
ENSMUST00000202361	ENSMUSG00000029657	Hsph1	chr5:149614286-149636376	14.4753	24.3507	-0.750367	5e-05	0.00141417
ENSMUST00000073782	ENSMUSG00000060336	Zfp937	chr2:150218072-150240725	2.51331	6.24391	-1.31286	5e-05	0.00141417
ENSMUST00000090811	ENSMUSG00000008226	Scrn3	chr2:73283104-73337818	11.1517	16.3323	-0.550468	0.00065	0.0133036
ENSMUST00000089129	ENSMUSG00000068086	Cyp2d9	chr15:82452376-82456827	115.079	163.563	-0.507219	5e-05	0.00141417
ENSMUST00000063814	ENSMUSG00000052102	Gnpda1	chr18:38327557-38339003	50.6208	69.0712	-0.448353	5e-05	0.00141417
ENSMUST00000020776	ENSMUSG00000020482	Ccdc117	chr11:5528886-5542187	8.8514	11.6689	-0.398686	0.00085	0.0165966
ENSMUST00000022380	ENSMUSG00000021832	Psmc6	chr14:45329823-45349071	60.7684	80.4064	-0.403987	0.00015	0.00378624
ENSMUST00000072576	ENSMUSG00000014504	Srp19	chr18:34331144-34336599	18.8378	25.7272	-0.449663	0.001	0.0189868
ENSMUST00000055424	ENSMUSG00000025144	Stra13	chr11:120710941-120713738	55.4545	75.0893	-0.437302	0.00085	0.0165966
ENSMUST00000168119	ENSMUSG00000041698	Slco1a1	chr6:141907281-141946962	2.29169	83.9501	-5.19505	5e-05	0.00141417
ENSMUST00000067929	ENSMUSG00000030759	Far1	chr7:113513833-113571511	44.8714	65.3498	-0.542385	0.0002	0.00485099
ENSMUST00000023360	ENSMUSG00000022679	Mpv17l	chr16:13903160-13949619	38.0572	120.729	-1.66553	5e-05	0.00141417
ENSMUST00000066529	ENSMUSG00000022206	Npr3	chr15:11839895-11905674	2.81998	5.94736	-1.07656	5e-05	0.00141417
ENSMUST00000021851	ENSMUSG00000021414	Fam217a	chr13:34909963-34919992	1.10522	1.72178	-0.63956	0.0017	0.0293704
ENSMUST00000021853	ENSMUSG00000021416	Eci3	chr13:34924408-34963810	112.165	227.385	-1.01951	5e-05	0.00141417
ENSMUST00000106921	ENSMUSG00000057722	Lepr	chr4:101717403-101815352	0.307649	0.998781	-1.69888	5e-05	0.00141417
ENSMUST00000024739	ENSMUSG00000023944	Hsp90ab1	chr17:45567774-45573271	217.365	342.388	-0.655508	5e-05	0.00141417
ENSMUST00000034131	ENSMUSG00000031696	Vps35	chr8:85260396-85299513	77.6259	97.3548	-0.326713	0.00255	0.0407945
ENSMUST00000114902	ENSMUSG00000060771	Tsga10	chr1:37754775-37866429	0.155147	0.773051	-2.31692	0.0004	0.00878381
ENSMUST00000106102	ENSMUSG00000043872	Zmym1	chr4:127047093-127061152	1.27733	2.13249	-0.739404	0.001	0.0189868
ENSMUST00000039956	ENSMUSG00000034591	Slc41a2	chr10:83230847-83337882	5.4386	10.5701	-0.958678	5e-05	0.00141417
ENSMUST00000090461	ENSMUSG00000022148	Fyb	chr15:6579870-6663304	0.896401	1.53142	-0.772658	0.0003	0.00690244
ENSMUST00000169168	ENSMUSG00000033470	Cysltr2	chr14:73029127-73049114	0.342926	0.841498	-1.29506	0.0002	0.00485099
ENSMUST00000115227	ENSMUSG00000046598	Bdh1	chr16:31422279-31458901	4.86553	16.4958	-1.76143	5e-05	0.00141417
ENSMUST00000115222	ENSMUSG00000047412	Zbtb44	chr9:31030643-31075879	11.0454	14.8539	-0.427403	0.0002	0.00485099
ENSMUST00000095360	ENSMUSG00000020053	Igf1	chr10:87858264-87937042	0.703634	1.25806	-0.838305	5e-05	0.00141417
ENSMUST00000020317	ENSMUSG00000020116	Pno1	chr11:17203197-17211568	28.9154	36.5575	-0.338326	0.00285	0.0444141
ENSMUST00000025363	ENSMUSG00000024486	Hbegf	chr18:36504928-36515805	5.94509	7.93719	-0.416929	0.00195	0.0327838
ENSMUST00000025092	ENSMUSG00000024245	Tmem178	chr17:80944631-81001816	15.4041	22.8902	-0.571415	5e-05	0.00141417
ENSMUST00000054945	ENSMUSG00000028427	Aqp7	chr4:41033073-41048139	8.23862	12.4482	-0.59546	5e-05	0.00141417
ENSMUST00000111742	ENSMUSG00000030268	Bcat1	chr6:144993834-145076184	0.0982342	1.4299	-3.86355	5e-05	0.00141417
ENSMUST00000096495	ENSMUSG00000064127	Med14	chrX:12675368-12762073	10.3072	24.4791	-1.24789	5e-05	0.00141417
ENSMUST00000054050	ENSMUSG00000051124	Gimap9	chr6:48676128-48679114	8.24331	12.411	-0.590321	5e-05	0.00141417
ENSMUST00000099441	ENSMUSG00000033114	Slc35d2	chr13:64096309-64129330	5.32142	8.39908	-0.65842	5e-05	0.00141417
ENSMUST00000007212	ENSMUSG00000006998	Psmd2	chr16:20651651-20663414	52.7875	68.2881	-0.371439	0.00095	0.0182319
ENSMUST00000029748	ENSMUSG00000015947	Fcgr1	chr3:96282908-96293969	0.288357	0.58063	-1.00977	0.0018	0.0306903
ENSMUST00000160180	ENSMUSG00000024646	Cyb5a	chr18:84851337-84880401	231.807	411.709	-0.828697	5e-05	0.00141417
ENSMUST00000021425	ENSMUSG00000021037	Ahsa1	chr12:87266745-87273997	34.5867	48.8041	-0.496786	5e-05	0.00141417
ENSMUST00000052124	ENSMUSG00000039193	Nlrc4	chr17:74426294-74459108	0.182205	1.1079	-2.60419	5e-05	0.00141417
ENSMUST00000073388	ENSMUSG00000017718	Afmid	chr11:117809667-117839908	32.3982	47.9161	-0.564598	0.00065	0.0133036
ENSMUST00000002551	ENSMUSG00000002477	Snrpd1	chr18:10617795-10628230	20.2912	26.9318	-0.408459	0.0027	0.0426527
ENSMUST00000035258	ENSMUSG00000056290	Ms4a4b	chr19:11443572-11463549	0.382046	0.9784	-1.35668	0.0006	0.0124324
ENSMUST00000043520	ENSMUSG00000038365	Fbxo25	chr8:13907805-13940521	9.52261	13.386	-0.491301	0.0002	0.00485099
ENSMUST00000022871	ENSMUSG00000022261	Sdc2	chr15:32920722-33034730	43.0679	64.3006	-0.578219	5e-05	0.00141417
ENSMUST00000061491	ENSMUSG00000027359	Slc27a2	chr2:126521201-126588243	665.329	1050.13	-0.658431	5e-05	0.00141417
ENSMUST00000032260	ENSMUSG00000030157	Clec2d	chr6:129180614-129186534	33.9012	57.8228	-0.770302	5e-05	0.00141417
ENSMUST00000031103	ENSMUSG00000029201	Ugdh	chr5:65413220-65537184	34.7031	51.5113	-0.569824	0.00025	0.00588258
ENSMUST00000034552	ENSMUSG00000032051	Fdx1	chr9:51943306-51963533	64.976	85.3978	-0.394292	0.0006	0.0124324
ENSMUST00000111868	ENSMUSG00000030228	Pik3c2g	chr6:139715860-139969284	0.255691	0.525838	-1.04022	0.00035	0.00785859
ENSMUST00000016640	ENSMUSG00000016496	Cd274	chr19:29367454-29388095	1.14925	1.79915	-0.646624	0.00035	0.00785859
ENSMUST00000168419	ENSMUSG00000024644	Cndp2	chr18:84667469-84685633	44.5249	176.624	-1.98799	5e-05	0.00141417
ENSMUST00000033335	ENSMUSG00000031023	Akip1	chr7:109703689-109723850	17.0186	23.1231	-0.442222	0.00095	0.0182319
ENSMUST00000039630	ENSMUSG00000035305	Ror1	chr4:100095790-100444765	1.96325	2.98043	-0.602277	5e-05	0.00141417
ENSMUST00000039631	ENSMUSG00000035783	Acta2	chr19:34241089-34255336	6.89959	9.70531	-0.492264	0.00085	0.0165966
ENSMUST00000042251	ENSMUSG00000019763	Rmnd1	chr10:4401914-4432388	13.1331	17.478	-0.412324	0.0011	0.020454
ENSMUST00000025468	ENSMUSG00000024575	Pde6a	chr18:61220481-61289924	3.68427	8.20796	-1.15565	5e-05	0.00141417
ENSMUST00000036719	ENSMUSG00000039621	Prex1	chr2:166566341-166713832	1.2974	1.88071	-0.535648	0.00025	0.00588258
ENSMUST00000156876	ENSMUSG00000041439	Mfsd6	chr1:52656285-52727462	2.92096	4.53864	-0.635821	5e-05	0.00141417
ENSMUST00000189688	ENSMUSG00000003283	Hck	chr2:153108467-153151441	0.235841	0.813682	-1.78665	5e-05	0.00141417
ENSMUST00000068584	ENSMUSG00000015355	Cd48	chr1:171682008-171705258	0.545334	1.1838	-1.11821	0.0016	0.0279374
ENSMUST00000057792	ENSMUSG00000032667	Pon2	chr6:5264146-5298455	4.77739	7.82969	-0.712732	5e-05	0.00141417
ENSMUST00000200543	ENSMUSG00000028184	Adgrl2	chr3:148815582-149004031	6.18429	10.3061	-0.736814	5e-05	0.00141417
ENSMUST00000023559	ENSMUSG00000022853	Ehhadh	chr16:21761286-21787844	119.669	235.228	-0.975015	5e-05	0.00141417
ENSMUST00000060441	ENSMUSG00000046207	Pik3r6	chr11:68503018-68552698	0.314287	0.718517	-1.19294	0.00045	0.009687
ENSMUST00000021956	ENSMUSG00000021494	Ddx41	chr13:55530409-55536658	15.3135	21.2223	-0.470773	5e-05	0.00141417
ENSMUST00000038845	ENSMUSG00000040747	Cd53	chr3:106759920-106790149	1.85135	3.01815	-0.705087	0.0005	0.0106375
ENSMUST00000034905	ENSMUSG00000032350	Gclc	chr9:77754534-77794485	41.7212	75.0741	-0.847533	5e-05	0.00141417
ENSMUST00000032421	ENSMUSG00000030283	St8sia1	chr6:142814230-142964452	21.8883	36.4817	-0.737013	5e-05	0.00141417
ENSMUST00000136755	ENSMUSG00000021763	BC067074	chr13:113317083-113379711	2.35154	3.7851	-0.686728	5e-05	0.00141417
ENSMUST00000041331	ENSMUSG00000037071	Scd1	chr19:44394450-44407709	8.06649	15.8899	-0.978101	5e-05	0.00141417
ENSMUST00000042970	ENSMUSG00000041695	Kcnj2	chr11:111066163-111076821	1.12997	2.27788	-1.01141	5e-05	0.00141417
ENSMUST00000030914	ENSMUSG00000029048	Rer1	chr4:155074109-155086373	83.5655	108.494	-0.376634	0.00055	0.0115424
ENSMUST00000020922	ENSMUSG00000020601	Trib2	chr12:15791726-15816785	11.0488	16.4601	-0.575081	5e-05	0.00141417
ENSMUST00000029639	ENSMUSG00000028007	Snx7	chr3:117781646-117868936	32.6812	45.9078	-0.490279	5e-05	0.00141417
ENSMUST00000059888	ENSMUSG00000026971	Itgb6	chr2:60598291-60722643	14.9138	27.115	-0.862442	5e-05	0.00141417
ENSMUST00000165117	ENSMUSG00000040274	Cdk6	chr5:3341484-3531008	3.52566	5.00235	-0.50471	5e-05	0.00141417
ENSMUST00000034000	ENSMUSG00000031591	Asah1	chr8:41340196-41374773	26.9164	39.8516	-0.566153	5e-05	0.00141417
ENSMUST00000015394	ENSMUSG00000050578	Mmp13	chr9:7272513-7283333	0.219648	1.27228	-2.53415	5e-05	0.00141417
ENSMUST00000166381	ENSMUSG00000090546	Cdr1	chrX:61183245-61185558	0.0345586	0.543237	-3.97447	0.0001	0.00265335
ENSMUST00000091848	ENSMUSG00000045410	Akr1e1	chr13:4590756-4609174	37.3448	48.0726	-0.364307	0.0031	0.0474879
ENSMUST00000105613	ENSMUSG00000029063	Nadk	chr4:155562377-155591001	39.2732	55.7936	-0.506554	0.0009	0.0174274
ENSMUST00000038144	ENSMUSG00000042379	Esm1	chr13:113171607-113225908	7.13151	18.5559	-1.3796	5e-05	0.00141417
ENSMUST00000076521	ENSMUSG00000026638	Irf6	chr1:193153110-193201547	12.9639	21.2152	-0.710597	5e-05	0.00141417
ENSMUST00000044478	ENSMUSG00000041426	Hibch	chr1:52845012-52920986	34.3838	49.2449	-0.518247	5e-05	0.00141417
ENSMUST00000061594	ENSMUSG00000045034	Ankrd34b	chr13:92425895-92441658	0.250148	0.605429	-1.27518	0.0001	0.00265335
ENSMUST00000087341	ENSMUSG00000024795	Kif20b	chr19:34922357-34975731	0.622471	2.7612	-2.14922	5e-05	0.00141417
ENSMUST00000023460	ENSMUSG00000022774	Ncbp2	chr16:31948512-31958472	12.8483	16.6832	-0.376817	0.0013	0.0235944
ENSMUST00000072633	ENSMUSG00000020839	Tmigd1	chr11:76902158-76916587	54.0119	187.21	-1.79331	5e-05	0.00141417
ENSMUST00000058659	ENSMUSG00000044986	Tst	chr15:78399555-78405859	65.1833	92.3836	-0.503136	5e-05	0.00141417
ENSMUST00000203414	ENSMUSG00000102758	Naaladl2	chr3:23798101-24783622	0.759814	1.7995	-1.24388	5e-05	0.00141417
ENSMUST00000029402	ENSMUSG00000027822	Slc33a1	chr3:63933506-63968659	32.6463	49.6752	-0.605605	5e-05	0.00141417
ENSMUST00000029400	ENSMUSG00000027820	Mme	chr3:63241536-63386030	21.256	37.0665	-0.802245	5e-05	0.00141417
ENSMUST00000163083	ENSMUSG00000024646	Cyb5a	chr18:84851337-84880401	340.261	623.739	-0.874302	5e-05	0.00141417
ENSMUST00000030771	ENSMUSG00000029014	Dnajc2	chr5:21757266-21785251	13.7211	19.7815	-0.527755	5e-05	0.00141417
ENSMUST00000167085	ENSMUSG00000038305	Spats2l	chr1:57774161-57948394	0.542893	1.59101	-1.5512	5e-05	0.00141417
ENSMUST00000176059	ENSMUSG00000093769	Hist2h3c1	chr3:96246684-96248504	0.625643	1.55253	-1.31121	5e-05	0.00141417
ENSMUST00000090127	ENSMUSG00000105504	Gbp5	chr3:142496899-142522344	0.421972	1.01105	-1.26063	5e-05	0.00141417
ENSMUST00000043458	ENSMUSG00000038541	Srd5a2	chr17:74017705-74047916	1.604	11.6109	-2.85573	5e-05	0.00141417
ENSMUST00000019333	ENSMUSG00000019189	Rnf145	chr11:44518963-44565520	22.4736	37.7303	-0.747492	5e-05	0.00141417
ENSMUST00000039174	ENSMUSG00000038151	Prdm1	chr10:44437176-44458748	0.143946	0.645214	-2.16425	5e-05	0.00141417
ENSMUST00000085909	ENSMUSG00000032076	Cadm1	chr9:47530172-47857637	1.87584	4.26652	-1.18553	0.0001	0.00265335
ENSMUST00000042196	ENSMUSG00000042116	Vwa1	chr4:155768148-155776161	5.70643	9.93783	-0.800341	5e-05	0.00141417
ENSMUST00000025547	ENSMUSG00000024645	Timm21	chr18:84935157-84981376	12.3922	16.4508	-0.408723	0.0017	0.0293704
ENSMUST00000025546	ENSMUSG00000024644	Cndp2	chr18:84667469-84685633	98.6879	466.798	-2.24185	5e-05	0.00141417
ENSMUST00000075068	ENSMUSG00000063931	Pepd	chr7:34912378-35044708	127.762	168.926	-0.402927	0.0003	0.00690244
ENSMUST00000170051	ENSMUSG00000002944	Cd36	chr5:17781689-17888801	5.42785	44.2832	-3.02831	5e-05	0.00141417
ENSMUST00000031556	ENSMUSG00000029571	Tmem106b	chr6:13069758-13089269	72.7161	95.8216	-0.398077	0.00035	0.00785859
ENSMUST00000034989	ENSMUSG00000032418	Me1	chr9:86581370-86695953	78.7638	174.96	-1.15142	5e-05	0.00141417
ENSMUST00000036584	ENSMUSG00000033610	Pank1	chr19:34810893-34879455	25.178	40.6858	-0.692365	0.00145	0.0257185
ENSMUST00000193547	ENSMUSG00000039542	Ncam1	chr9:49502135-49798925	0.737001	1.1399	-0.629164	0.0009	0.0174274
ENSMUST00000072403	ENSMUSG00000049152	Ugt3a2	chr15:9335549-9370955	507.708	903.846	-0.832078	5e-05	0.00141417
ENSMUST00000115341	ENSMUSG00000022884	Eif4a2	chr16:23107443-23127737	67.3801	98.7169	-0.550975	0.00045	0.009687
ENSMUST00000025065	ENSMUSG00000024228	Nudt12	chr17:58999617-59013372	16.4992	22.4718	-0.445721	0.00015	0.00378624
ENSMUST00000115628	ENSMUSG00000013539	Tango2	chr16:18300826-18343927	33.938	46.9411	-0.46795	5e-05	0.00141417
ENSMUST00000045522	ENSMUSG00000039578	Ccser1	chr6:61180323-62382865	2.26512	3.72201	-0.716499	0.00035	0.00785859
ENSMUST00000049184	ENSMUSG00000034911	Ushbp1	chr8:71384273-71395801	2.05781	2.91447	-0.502125	0.00105	0.019753
ENSMUST00000120472	ENSMUSG00000033032	Afap1l1	chr18:61726432-61786702	6.38858	10.1612	-0.669507	5e-05	0.00141417
ENSMUST00000046383	ENSMUSG00000039304	Tnfsf10	chr3:27317027-27342427	10.2971	21.4209	-1.05678	5e-05	0.00141417
ENSMUST00000046384	ENSMUSG00000036905	C1qb	chr4:136880128-136886187	10.066	14.7619	-0.552393	0.0001	0.00265335
ENSMUST00000110191	ENSMUSG00000021360	Gcnt2	chr13:40859767-41013015	11.277	17.231	-0.611615	5e-05	0.00141417
ENSMUST00000110194	ENSMUSG00000048911	Rnf24	chr2:131262499-131352881	1.15827	11.2518	-3.28012	5e-05	0.00141417
ENSMUST00000100874	ENSMUSG00000048163	Selplg	chr5:113818535-113832644	0.976569	1.6155	-0.726188	0.00235	0.038101
ENSMUST00000047034	ENSMUSG00000015599	Ttbk1	chr17:46442447-46487675	0.364074	0.923426	-1.34276	5e-05	0.00141417
ENSMUST00000044602	ENSMUSG00000057074	Ces1g	chr8:93302368-93337308	1.42727	7.94713	-2.47718	5e-05	0.00141417
ENSMUST00000005620	ENSMUSG00000005483	Dnajb1	chr8:83608174-83611902	14.8616	22.5483	-0.601426	5e-05	0.00141417
ENSMUST00000025666	ENSMUSG00000024757	Slc22a19	chr19:7673060-7711310	3.52972	35.5143	-3.33077	5e-05	0.00141417
ENSMUST00000102649	ENSMUSG00000028653	Trit1	chr4:123016596-123054949	3.56389	5.44405	-0.61123	0.0002	0.00485099
ENSMUST00000119475	ENSMUSG00000054690	Emcn	chr3:137341066-137432185	16.2053	25.6571	-0.662896	0.0001	0.00265335
ENSMUST00000060484	ENSMUSG00000049037	Clec4a1	chr6:122921847-122934619	0.135267	0.641734	-2.24617	0.00015	0.00378624
ENSMUST00000023151	ENSMUSG00000022508	Bcl6	chr16:23965051-23988852	6.80007	13.6447	-1.00472	5e-05	0.00141417
ENSMUST00000115964	ENSMUSG00000079834	Tmlhe	GL456233.1:159646-334183	10.8548	15.6322	-0.526189	5e-05	0.00141417
ENSMUST00000050897	ENSMUSG00000043065	Spice1	chr16:44347120-44388497	1.21633	1.77078	-0.541847	0.0008	0.0157593
ENSMUST00000068031	ENSMUSG00000020914	Top2a	chr11:98992942-99024189	0.853277	1.38445	-0.69823	0.00015	0.00378624
ENSMUST00000055413	ENSMUSG00000071632	2510002D24Rik	chr16:18836577-18840160	9.05453	12.4468	-0.459062	0.00105	0.019753
ENSMUST00000043822	ENSMUSG00000040525	Cblc	chr7:19779717-19796809	7.61561	10.3217	-0.438655	0.00135	0.0242813
ENSMUST00000000500	ENSMUSG00000000489	Pdgfb	chr15:79995899-80014808	3.98313	6.39903	-0.68395	5e-05	0.00141417
ENSMUST00000123082	ENSMUSG00000060771	Tsga10	chr1:37754775-37866429	0.893609	1.96356	-1.13575	5e-05	0.00141417
ENSMUST00000099972	ENSMUSG00000027009	Itga4	chr2:79255499-79428891	0.353457	0.75532	-1.09555	5e-05	0.00141417
ENSMUST00000046959	ENSMUSG00000040966	Slc22a2	chr17:12584188-12628465	62.7378	152.193	-1.27849	5e-05	0.00141417
ENSMUST00000118466	ENSMUSG00000021792	Fam213a	chr14:40993739-41013788	26.3797	42.3621	-0.683348	5e-05	0.00141417
ENSMUST00000002274	ENSMUSG00000002204	Napsa	chr7:44572431-44586862	383.243	843.641	-1.13837	5e-05	0.00141417
ENSMUST00000149983	ENSMUSG00000028124	Gclm	chr3:122245556-122293547	20.4096	49.7139	-1.2844	0.00075	0.0149651
ENSMUST00000026613	ENSMUSG00000025534	Gusb	chr5:129989010-130003049	8.47723	12.2758	-0.534149	5e-05	0.00141417
ENSMUST00000028426	ENSMUSG00000027035	Cers6	chr2:68861440-69114282	22.27	30.8813	-0.471628	5e-05	0.00141417
ENSMUST00000113451	ENSMUSG00000061742	Slc22a12	chr19:6418730-6544169	228.442	462.161	-1.01657	5e-05	0.00141417
ENSMUST00000047511	ENSMUSG00000041362	Shtn1	chr19:58973357-59076069	3.97183	5.33316	-0.425186	0.0012	0.0220581
ENSMUST00000156481	ENSMUSG00000015804	Med28	chr5:45520228-45529276	6.32506	9.83378	-0.636666	5e-05	0.00141417
ENSMUST00000074613	ENSMUSG00000060923	Acyp2	chr11:30505990-30649587	17.2254	23.4083	-0.442483	0.00135	0.0242813
ENSMUST00000034929	ENSMUSG00000032370	Lactb	chr9:66955392-66975484	29.7326	42.0189	-0.498991	5e-05	0.00141417
ENSMUST00000025567	ENSMUSG00000024665	Fads2	chr19:10064163-10101503	55.2218	80.7939	-0.549008	5e-05	0.00141417
ENSMUST00000042119	ENSMUSG00000041698	Slco1a1	chr6:141907281-141946962	4.8846	180.115	-5.20454	5e-05	0.00141417
ENSMUST00000174230	ENSMUSG00000021418	Rpp40	chr13:35893471-35906359	3.40221	6.65674	-0.968344	5e-05	0.00141417
ENSMUST00000174236	ENSMUSG00000038843	Gcnt1	chr19:17326140-17356667	152.703	243.207	-0.671454	0.0003	0.00690244
ENSMUST00000138112	ENSMUSG00000019767	Ccdc170	chr10:4482501-4562231	0.073049	0.424475	-2.53874	0.0002	0.00485099
ENSMUST00000023444	ENSMUSG00000022761	Lztr1	chr16:17508687-17526333	32.1122	41.6494	-0.375172	0.00065	0.0133036
ENSMUST00000025357	ENSMUSG00000024480	Ap3s1	chr18:46741916-46790826	13.546	19.7006	-0.540368	5e-05	0.00141417
ENSMUST00000022518	ENSMUSG00000021951	N6amt2	chr14:57549597-57571569	5.02696	8.25368	-0.715351	0.0005	0.0106375
ENSMUST00000015484	ENSMUSG00000015340	Cybb	chrX:9435251-9487771	1.6079	2.98363	-0.891885	5e-05	0.00141417
ENSMUST00000043551	ENSMUSG00000040351	Ankib1	chr5:3689999-3802925	26.212	37.188	-0.504611	5e-05	0.00141417
ENSMUST00000000299	ENSMUSG00000000290	Itgb2	chr10:77530251-77565686	0.683885	1.64972	-1.2704	5e-05	0.00141417
ENSMUST00000120223	ENSMUSG00000045215	Asxl3	chr18:22345088-22530227	0.357695	0.808966	-1.17735	5e-05	0.00141417
ENSMUST00000002389	ENSMUSG00000022218	Tgm1	chr14:55700008-55713492	1.20003	6.00464	-2.323	5e-05	0.00141417
ENSMUST00000007800	ENSMUSG00000007656	Arpp19	chr9:75037613-75060313	5.82274	8.96248	-0.622199	0.00205	0.0341843
ENSMUST00000206589	ENSMUSG00000025153	Fasn	chr11:120805845-120824547	4.2637	6.14157	-0.526503	0.00045	0.009687
ENSMUST00000037315	ENSMUSG00000039202	Abhd2	chr7:79273198-79365508	25.4542	42.8592	-0.7517	5e-05	0.00141417
ENSMUST00000022821	ENSMUSG00000022210	Dhrs4	chr14:55478757-55490338	81.2096	102.677	-0.338383	0.00175	0.0300127
ENSMUST00000032892	ENSMUSG00000030657	Xylt1	chr7:117380978-117673580	6.36025	8.10029	-0.34889	0.0028	0.0438435
ENSMUST00000176085	ENSMUSG00000093679	Vmn1r20	chr6:57431643-57432695	0.805611	2.11485	-1.3924	5e-05	0.00141417
ENSMUST00000171737	ENSMUSG00000011179	Odc1	chr12:17544872-17551502	96.959	356.572	-1.87875	5e-05	0.00141417
ENSMUST00000059672	ENSMUSG00000025017	Pik3ap1	chr19:41274217-41385070	0.380461	0.863363	-1.18222	0.0001	0.00265335
ENSMUST00000118828	ENSMUSG00000037098	Rab11fip3	chr17:25989035-26069409	107.199	160.483	-0.582126	5e-05	0.00141417
ENSMUST00000028595	ENSMUSG00000027173	Depdc7	chr2:104721783-104742878	17.5699	23.4154	-0.41435	0.0007	0.0141397
ENSMUST00000028045	ENSMUSG00000026712	Mrc1	chr2:14229391-14332057	0.889195	1.31436	-0.563788	0.00085	0.0165966
ENSMUST00000048209	ENSMUSG00000063229	Ldha	chr7:46841474-46855627	283.703	377.809	-0.413278	0.00015	0.00378624
ENSMUST00000048208	ENSMUSG00000034795	Ccdc122	chr14:77036771-77112204	1.68886	2.73346	-0.694676	0.00035	0.00785859
ENSMUST00000148144	ENSMUSG00000034593	Myo5a	chr9:75071187-75223688	0.250673	3.90338	-3.96084	0.00145	0.0257185
ENSMUST00000043696	ENSMUSG00000038224	Serpinf2	chr11:75431731-75439591	13.0967	40.5169	-1.62931	5e-05	0.00141417
ENSMUST00000027123	ENSMUSG00000025980	Hspd1	chr1:55077834-55091307	223.129	326.568	-0.549504	5e-05	0.00141417
ENSMUST00000085056	ENSMUSG00000066366	Serpina1a	chr12:103853588-103863562	26.1009	38.3149	-0.553804	5e-05	0.00141417
ENSMUST00000001825	ENSMUSG00000001774	Chordc1	chr9:18292266-18314000	15.2183	24.9094	-0.710879	5e-05	0.00141417
ENSMUST00000060077	ENSMUSG00000022742	Cpox	chr16:58670207-58680391	30.9066	44.9006	-0.538816	5e-05	0.00141417
ENSMUST00000187711	ENSMUSG00000032265	Fam46a	chr9:85320438-85327348	0.923139	2.23731	-1.27715	0.0003	0.00690244
ENSMUST00000054294	ENSMUSG00000044674	Fzd1	chr5:4753838-4758035	15.9327	21.437	-0.428107	5e-05	0.00141417
ENSMUST00000031793	ENSMUSG00000029780	Nt5c3	chr6:56882399-56923932	21.9485	31.5223	-0.522255	5e-05	0.00141417
ENSMUST00000026318	ENSMUSG00000025283	Sat1	chrX:155213131-155216449	129.347	168.849	-0.384483	0.0005	0.0106375
ENSMUST00000081035	ENSMUSG00000046805	Mpeg1	chr19:12460778-12465284	2.89164	6.02661	-1.05946	5e-05	0.00141417
ENSMUST00000107802	ENSMUSG00000034317	Trim59	chr3:69035287-69044755	0.498664	0.842992	-0.75745	0.00185	0.031399
ENSMUST00000110523	ENSMUSG00000058914	C1qtnf3	chr15:10952331-10980150	6.4328	31.5702	-2.29504	5e-05	0.00141417
ENSMUST00000115582	ENSMUSG00000036585	Fgf1	chr18:38676717-39376284	4.37975	10.9144	-1.31731	0.00145	0.0257185
ENSMUST00000020974	ENSMUSG00000020644	Id2	chr12:25093800-25096092	220.767	287.412	-0.380592	0.0007	0.0141397
ENSMUST00000049744	ENSMUSG00000012429	Mplkip	chr13:17695412-17699105	4.80247	6.39259	-0.412626	0.0019	0.0321013
ENSMUST00000047815	ENSMUSG00000039463	Slc9a8	chr2:167421711-167477000	9.70806	25.2818	-1.38084	5e-05	0.00141417
ENSMUST00000023509	ENSMUSG00000062901	Klhl24	chr16:20097553-20127744	30.4929	42.1916	-0.468484	0.00015	0.00378624
ENSMUST00000121992	ENSMUSG00000031549	Ido2	chr8:24532453-24576333	1.36167	4.28666	-1.65448	5e-05	0.00141417
ENSMUST00000066439	ENSMUSG00000053799	Exoc6	chr19:37550417-37683245	37.5559	51.9191	-0.467226	5e-05	0.00141417
ENSMUST00000001327	ENSMUSG00000001281	Itgb7	chr15:102215994-102231935	0.214565	0.50525	-1.23558	0.00065	0.0133036
ENSMUST00000002678	ENSMUSG00000002603	Tgfb1	chr7:25687001-25705077	4.00426	5.76665	-0.526198	0.0003	0.00690244
ENSMUST00000021016	ENSMUSG00000020679	Hnf1b	chr11:83850062-83905819	25.267	41.4262	-0.713289	5e-05	0.00141417
ENSMUST00000031341	ENSMUSG00000029394	Cdk2ap1	chr5:124345416-124363082	17.7707	23.6768	-0.413975	0.001	0.0189868
ENSMUST00000107107	ENSMUSG00000028577	Plaa	chr4:94569166-94603244	25.4284	33.1852	-0.384098	0.00045	0.009687
ENSMUST00000102881	ENSMUSG00000020120	Plek	chr11:16971205-17079371	0.284572	1.01302	-1.8318	5e-05	0.00141417
ENSMUST00000065856	ENSMUSG00000053414	Hunk	chr16:90386396-90499553	2.63818	3.45904	-0.390829	0.0033	0.0499537
ENSMUST00000056071	ENSMUSG00000043263	Pyhin1	chr1:173630916-173647928	0.349609	0.649959	-0.894605	0.00075	0.0149651
ENSMUST00000118991	ENSMUSG00000024070	Prkd3	chr17:78949404-79020816	1.9385	9.63618	-2.31352	0.00135	0.0242813
ENSMUST00000068106	ENSMUSG00000054850	Smim10l2a	chrX:56374585-56377799	0.494491	1.09609	-1.14835	5e-05	0.00141417
ENSMUST00000007602	ENSMUSG00000007458	M6pr	chr6:122308719-122317680	70.9884	97.2945	-0.454774	5e-05	0.00141417
ENSMUST00000069686	ENSMUSG00000021720	Rnf180	chr13:105149351-105271039	0.241168	0.729717	-1.5973	0.0003	0.00690244
ENSMUST00000025802	ENSMUSG00000024869	Nudt8	chr19:4000579-4002103	31.783	50.7018	-0.673781	5e-05	0.00141417
ENSMUST00000078509	ENSMUSG00000024039	Cbs	chr17:31612622-31637199	27.8261	57.2876	-1.04179	5e-05	0.00141417
ENSMUST00000044503	ENSMUSG00000039316	Rftn1	chr17:49992256-50190674	0.584594	1.18831	-1.0234	0.00085	0.0165966
ENSMUST00000021738	ENSMUSG00000021306	Gpr137b	chr13:13357622-13393624	38.111	61.8122	-0.697684	5e-05	0.00141417
ENSMUST00000035890	ENSMUSG00000041052	Slc7a13	chr4:19818724-19842218	59.1523	470.818	-2.99266	5e-05	0.00141417
ENSMUST00000170511	ENSMUSG00000090486	BC035947	chr1:78497025-78538173	16.0785	25.0565	-0.640054	0.0002	0.00485099
ENSMUST00000079597	ENSMUSG00000064225	Paqr9	chr9:95559656-95568023	19.49	24.8419	-0.350038	0.00155	0.0272269
ENSMUST00000118717	ENSMUSG00000033715	Akr1c14	chr13:4049010-4090422	7.35013	33.012	-2.16715	5e-05	0.00141417
ENSMUST00000011492	ENSMUSG00000027710	Acad9	chr3:36065978-36092853	14.3696	20.9899	-0.546682	5e-05	0.00141417
ENSMUST00000021359	ENSMUSG00000020974	Pole2	chr12:69201778-69228190	0.621394	1.16215	-0.903217	0.00145	0.0257185
ENSMUST00000021284	ENSMUSG00000020902	Ntn1	chr11:68209363-68400823	8.70551	13.8904	-0.674089	5e-05	0.00141417
ENSMUST00000002403	ENSMUSG00000002332	Dhrs1	chr14:55739021-55745690	66.78	90.3197	-0.435626	5e-05	0.00141417
ENSMUST00000022169	ENSMUSG00000021665	Hexb	chr13:97137936-97198357	97.4968	139.272	-0.514475	5e-05	0.00141417
ENSMUST00000026398	ENSMUSG00000025347	Mettl7b	chr10:128933812-128960988	95.0187	137.675	-0.534984	5e-05	0.00141417
ENSMUST00000102598	ENSMUSG00000057236	Rbbp4	chr4:129287616-129335370	32.9397	43.0294	-0.385495	0.0008	0.0157593
ENSMUST00000032371	ENSMUSG00000030244	Gys2	chr6:142422612-142473109	9.53761	12.6574	-0.408279	0.0006	0.0124324
ENSMUST00000165984	ENSMUSG00000049103	Ccr2	chr9:124101949-124113557	0.276093	1.39328	-2.33526	5e-05	0.00141417
ENSMUST00000065651	ENSMUSG00000063590	Slc22a28	chr19:8062208-8131982	23.258	51.1373	-1.13665	5e-05	0.00141417
ENSMUST00000031051	ENSMUSG00000029161	Cgref1	chr5:30933142-30945591	98.3671	147.323	-0.582735	5e-05	0.00141417
ENSMUST00000046675	ENSMUSG00000040795	Iqcc	chr4:129615125-129619099	2.79614	3.96961	-0.505559	0.00215	0.0355551
ENSMUST00000172057	ENSMUSG00000026594	Ralgps2	chr1:156804165-156939626	1.43688	2.71034	-0.915533	5e-05	0.00141417
ENSMUST00000071442	ENSMUSG00000015094	Npdc1	chr2:25403070-25409494	7.66032	10.734	-0.486707	0.0007	0.0141397
ENSMUST00000047232	ENSMUSG00000042410	Agps	chr2:75832176-75931350	17.6205	76.7852	-2.12357	5e-05	0.00141417
ENSMUST00000012331	ENSMUSG00000012187	Mogat1	chr1:78497025-78538173	36.4861	72.7041	-0.994691	5e-05	0.00141417
ENSMUST00000027601	ENSMUSG00000026355	Mcm6	chr1:128331589-128359664	4.63602	6.94438	-0.582958	5e-05	0.00141417
ENSMUST00000023934	ENSMUSG00000052305	Hbb-bs	chr7:103826533-103828096	4.64398	19.1834	-2.04643	5e-05	0.00141417
ENSMUST00000034466	ENSMUSG00000031985	Gnpat	chr8:124863032-124890057	27.1482	33.9714	-0.323462	0.00285	0.0444141
ENSMUST00000033961	ENSMUSG00000031556	Tm2d2	chr8:25017210-25023259	66.2793	86.7036	-0.387534	0.0004	0.00878381
ENSMUST00000081170	ENSMUSG00000029156	Sgcb	chr5:73632748-73647790	2.14134	2.99648	-0.48476	0.00085	0.0165966
ENSMUST00000023061	ENSMUSG00000022426	Josd1	chr15:79674249-79687872	5.8725	8.54281	-0.540735	5e-05	0.00141417
ENSMUST00000130645	ENSMUSG00000027601	Mtfr1	chr3:19187326-19220817	38.6459	49.1212	-0.346033	0.00315	0.0481278
ENSMUST00000130643	ENSMUSG00000004865	Srpk1	chr17:28587647-28622521	16.8184	22.0864	-0.393122	0.00025	0.00588258
ENSMUST00000168039	ENSMUSG00000032006	Pdgfd	chr9:6168611-6378843	1.28966	3.40579	-1.401	0.0007	0.0141397
ENSMUST00000040498	ENSMUSG00000036492	Rnf39	chr17:36942917-36947986	0.170928	0.528803	-1.62934	0.0017	0.0293704
ENSMUST00000051396	ENSMUSG00000026600	Soat1	chr1:156424524-156474331	4.01068	7.07048	-0.817963	5e-05	0.00141417
ENSMUST00000033418	ENSMUSG00000017057	Il13ra1	chrX:36112109-36171259	15.3803	25.0518	-0.70383	5e-05	0.00141417
ENSMUST00000042553	ENSMUSG00000037953	A4gnt	chr9:99612501-99622367	1.80467	2.664	-0.56186	0.0006	0.0124324
ENSMUST00000020249	ENSMUSG00000020057	Dram1	chr10:88322803-88379080	2.18801	3.18684	-0.542505	0.00075	0.0149651
ENSMUST00000015368	ENSMUSG00000066097	Cyp2j11	chr4:96294507-96348662	90.6028	132.524	-0.548623	5e-05	0.00141417
ENSMUST00000102611	ENSMUSG00000020900	Myh10	chr11:68691914-68816632	15.8052	23.2404	-0.556235	5e-05	0.00141417
ENSMUST00000103221	ENSMUSG00000028991	Mtor	chr4:148448610-148557683	31.2252	43.9987	-0.49475	5e-05	0.00141417
ENSMUST00000032865	ENSMUSG00000030630	Fah	chr7:84585158-84606722	225.417	306.319	-0.442442	5e-05	0.00141417
ENSMUST00000048967	ENSMUSG00000037852	Cpe	chr8:64592557-64693040	3.94753	23.3101	-2.56193	5e-05	0.00141417
ENSMUST00000114294	ENSMUSG00000029802	Abcg2	chr6:58584522-58695676	224.164	318.771	-0.507969	5e-05	0.00141417
ENSMUST00000160534	ENSMUSG00000089694	Gm4477	chr6:85706726-85713205	9.77224	13.4319	-0.458906	0.00025	0.00588258
ENSMUST00000018593	ENSMUSG00000018449	Rpain	chr11:70970212-70977833	17.7275	23.691	-0.418348	0.0018	0.0306903
ENSMUST00000045706	ENSMUSG00000041301	Cftr	chr6:18170686-18322768	2.21476	3.50147	-0.660809	5e-05	0.00141417
ENSMUST00000028864	ENSMUSG00000027386	Fbln7	chr2:128862980-128897034	1.13735	2.43333	-1.09725	5e-05	0.00141417
ENSMUST00000165201	ENSMUSG00000038679	Trps1	chr15:50654751-50890463	9.72258	17.4388	-0.842893	5e-05	0.00141417
ENSMUST00000031978	ENSMUSG00000029918	Mrps33	chr6:39801803-39810988	27.9875	37.0696	-0.405452	0.00155	0.0272269
ENSMUST00000102517	ENSMUSG00000027314	Dll4	chr2:119325783-119335962	2.17321	3.2209	-0.567639	5e-05	0.00141417
ENSMUST00000023432	ENSMUSG00000022751	Nit2	chr16:57156670-57167332	65.048	83.9066	-0.36728	0.00075	0.0149651
ENSMUST00000036161	ENSMUSG00000041720	Pi4ka	chr16:17276299-17430826	10.1173	35.5407	-1.81265	5e-05	0.00141417
ENSMUST00000020169	ENSMUSG00000019989	Enpp3	chr10:24773813-24836195	24.1454	31.211	-0.370305	0.00075	0.0149651
ENSMUST00000079490	ENSMUSG00000055733	Nap1l3	chrX:122394564-122397401	0.612495	1.13424	-0.888957	5e-05	0.00141417
ENSMUST00000182283	ENSMUSG00000026395	Ptprc	chr1:138063406-138175306	1.18269	2.86506	-1.2765	5e-05	0.00141417
ENSMUST00000023884	ENSMUSG00000023120	Gm853	chr4:130209108-130222401	1.03561	21.9985	-4.40885	5e-05	0.00141417
ENSMUST00000023886	ENSMUSG00000023122	Sult1c2	chr17:53829636-53846339	82.0744	105.958	-0.368494	0.00105	0.019753
ENSMUST00000061350	ENSMUSG00000022533	Atp13a3	chr16:30312422-30388530	24.9459	34.7613	-0.478677	5e-05	0.00141417
ENSMUST00000091752	ENSMUSG00000069310	Hist1h3c	chr13:23745012-23745501	5.68382	9.28808	-0.708521	0.0029	0.0449794
ENSMUST00000056815	ENSMUSG00000026077	Npas2	chr1:39193730-39363236	0.147961	0.366786	-1.30972	0.0003	0.00690244
ENSMUST00000049248	ENSMUSG00000032688	Malt1	chr18:65430962-65478823	7.51989	10.3272	-0.457669	0.0001	0.00265335
ENSMUST00000000326	ENSMUSG00000000317	Bcl6b	chr11:70224127-70229739	1.4746	2.52666	-0.776903	5e-05	0.00141417
ENSMUST00000075838	ENSMUSG00000052595	A1cf	chr19:31868760-31949406	31.6303	39.6557	-0.326218	0.0021	0.034862
ENSMUST00000001497	ENSMUSG00000022219	Cideb	chr14:55745692-55758458	124.397	174.71	-0.490008	5e-05	0.00141417
ENSMUST00000006912	ENSMUSG00000026737	Pip4k2a	chr2:18842254-18998126	2.53873	3.45303	-0.443758	0.0025	0.0401043
ENSMUST00000110147	ENSMUSG00000072905	Gm2016	chr12:87874071-87877859	0	0.745416	#NAME?	5e-05	0.00141417
ENSMUST00000020234	ENSMUSG00000020044	Timp3	chr10:86055124-86498882	456.85	724.423	-0.665111	5e-05	0.00141417
ENSMUST00000119103	ENSMUSG00000032066	Bco2	chr9:50533086-50555181	5.33934	8.85062	-0.729118	5e-05	0.00141417
ENSMUST00000029968	ENSMUSG00000028292	Rars2	chr4:34614956-34660167	24.714	35.4385	-0.519984	5e-05	0.00141417
ENSMUST00000112132	ENSMUSG00000030359	Pzp	chr6:128483566-128526720	4.08665	35.3488	-3.11267	5e-05	0.00141417
ENSMUST00000022954	ENSMUSG00000022332	Khdrbs3	chr15:68928419-69093512	6.47004	13.0058	-1.00731	5e-05	0.00141417
ENSMUST00000205931	ENSMUSG00000108763	RP23-198F11.3	chr16:37850912-37861146	1.12319	1.92639	-0.7783	0.00305	0.0468446
ENSMUST00000132034	ENSMUSG00000038803	Ost4	chr5:30888693-30907788	63.2921	97.5848	-0.624632	0.00175	0.0300127
ENSMUST00000061973	ENSMUSG00000049734	Trex1	chr9:109057932-109074124	1.66669	4.42939	-1.41012	0.00125	0.0228388
ENSMUST00000034343	ENSMUSG00000031875	Cmtm3	chr8:104340593-104347672	2.54014	3.81063	-0.585121	0.00165	0.0286638
ENSMUST00000030118	ENSMUSG00000028410	Dnaja1	chr4:40722479-40757923	60.8703	97.4582	-0.679044	5e-05	0.00141417
ENSMUST00000105333	ENSMUSG00000059406	Tmprss9	chr10:80879719-80899441	0.0736001	0.462784	-2.65256	5e-05	0.00141417
ENSMUST00000111295	ENSMUSG00000013997	Nit1	chr1:171329144-171345646	65.7999	91.1995	-0.470941	0.00135	0.0242813
ENSMUST00000004232	ENSMUSG00000074207	Adh1	chr3:138277493-138307022	83.2383	280.264	-1.75147	5e-05	0.00141417
ENSMUST00000179636	ENSMUSG00000019894	Slc6a15	chr10:103367807-103419378	3.92698	9.84944	-1.32662	5e-05	0.00141417
ENSMUST00000005548	ENSMUSG00000005413	Hmox1	chr8:75093590-75100596	12.0337	16.1058	-0.420498	0.00065	0.0133036
ENSMUST00000077191	ENSMUSG00000064254	Ethe1	chr7:24583837-24608925	36.5922	56.6669	-0.630969	5e-05	0.00141417
ENSMUST00000077190	ENSMUSG00000032564	Cpne4	chr9:104547285-105034544	1.71278	2.76963	-0.693351	0.00055	0.0115424
ENSMUST00000021197	ENSMUSG00000020840	Blmh	chr11:76922306-76987379	29.2086	39.0377	-0.418474	0.00035	0.00785859
ENSMUST00000124223	ENSMUSG00000032743	D430042O09Rik	chr7:125707887-125874793	1.15468	2.33183	-1.01397	0.0004	0.00878381
ENSMUST00000038006	ENSMUSG00000026348	Acmsd	chr1:127719924-127774054	59.2791	88.623	-0.580158	0.0009	0.0174274
ENSMUST00000022368	ENSMUSG00000021822	Plau	chr14:20836661-20843388	57.3419	167.737	-1.54854	5e-05	0.00141417
ENSMUST00000079957	ENSMUSG00000058715	Fcer1g	chr1:171229571-171234365	4.8061	7.41894	-0.626346	0.00305	0.0468446
ENSMUST00000034140	ENSMUSG00000031703	Itfg1	chr8:85717556-85840949	47.6489	67.3926	-0.500146	5e-05	0.00141417
ENSMUST00000118101	ENSMUSG00000021081	Serpina1f	chr12:103688043-103695529	12.1836	26.6893	-1.13132	0.00035	0.00785859
ENSMUST00000069330	ENSMUSG00000001348	Acp5	chr9:22126730-22135746	38.2228	54.5538	-0.513247	5e-05	0.00141417
ENSMUST00000010188	ENSMUSG00000010044	Zmynd10	chr9:107547297-107551319	10.5826	14.2508	-0.429341	0.0011	0.020454
ENSMUST00000049583	ENSMUSG00000060862	Zbtb40	chr4:136979731-137048695	2.17041	2.8446	-0.390257	0.00285	0.0444141
ENSMUST00000000696	ENSMUSG00000000682	Cd52	chr4:134093535-134095082	4.68944	11.7604	-1.32646	5e-05	0.00141417
ENSMUST00000081525	ENSMUSG00000037348	Paqr7	chr4:134496696-134510235	11.7425	17.6224	-0.585669	0.001	0.0189868
ENSMUST00000093209	ENSMUSG00000069919	Hba-a1	chr11:32283510-32284465	3.22046	11.1747	-1.7949	5e-05	0.00141417
ENSMUST00000029729	ENSMUSG00000028088	Fmo5	chr3:97628803-97655282	1.22134	5.04293	-2.0458	0.0024	0.0387964
ENSMUST00000024755	ENSMUSG00000023959	Clic5	chr17:44188571-44280168	38.4192	52.1105	-0.439748	5e-05	0.00141417
ENSMUST00000109333	ENSMUSG00000061474	Mrps36	chr13:100735954-100744659	53.7314	70.2801	-0.387353	0.00325	0.0493611
ENSMUST00000023805	ENSMUSG00000023044	Csad	chr15:102176997-102189043	39.4607	82.4606	-1.06329	5e-05	0.00141417
ENSMUST00000026324	ENSMUSG00000025287	Acot9	chrX:155262442-155297654	19.2817	30.5304	-0.663016	5e-05	0.00141417
ENSMUST00000020864	ENSMUSG00000020553	Pctp	chr11:89982664-90002894	14.4664	19.3373	-0.418681	0.0004	0.00878381
ENSMUST00000032949	ENSMUSG00000030707	Coro1a	chr7:126699772-126707787	2.32417	4.53684	-0.964972	5e-05	0.00141417
ENSMUST00000092931	ENSMUSG00000071633	Gm4952	chr19:12599973-12628251	0.831116	2.0369	-1.29326	5e-05	0.00141417
ENSMUST00000043937	ENSMUSG00000041084	Ostc	chr3:130695911-130709444	25.0797	34.944	-0.478527	0.00015	0.00378624
ENSMUST00000100827	ENSMUSG00000030249	Abcc9	chr6:142587861-142702315	2.02989	4.34493	-1.09793	5e-05	0.00141417
ENSMUST00000094894	ENSMUSG00000070867	Trabd2b	chr4:114406723-114615098	16.5578	24.483	-0.564274	5e-05	0.00141417
ENSMUST00000119430	ENSMUSG00000021770	Samd8	chr14:21750530-21798725	10.7542	15.0598	-0.485802	5e-05	0.00141417
ENSMUST00000142166	ENSMUSG00000020839	Tmigd1	chr11:76902158-76916587	13.909	57.3871	-2.04471	5e-05	0.00141417
ENSMUST00000001412	ENSMUSG00000001376	Ccdc132	chr6:3498381-3603531	10.9084	14.6877	-0.429169	0.001	0.0189868
ENSMUST00000002145	ENSMUSG00000002076	Hsf2bp	chr17:31944768-32034508	0.431512	1.31975	-1.61279	5e-05	0.00141417
ENSMUST00000043214	ENSMUSG00000033220	Rac2	chr15:78559168-78572783	0.494559	1.01704	-1.04016	5e-05	0.00141417
ENSMUST00000164745	ENSMUSG00000030759	Far1	chr7:113513833-113571511	8.023	20.8731	-1.37943	5e-05	0.00141417
ENSMUST00000028683	ENSMUSG00000027248	Pdia3	chr2:121394354-121438687	138.991	177.439	-0.352326	0.0022	0.0361992
ENSMUST00000069451	ENSMUSG00000055737	Ghr	chr15:3317759-3583230	91.1791	171.183	-0.908768	5e-05	0.00141417
ENSMUST00000054072	ENSMUSG00000003929	Zfp81	chr17:33329341-33358878	2.12832	2.83628	-0.414285	0.0022	0.0361992
ENSMUST00000127247	ENSMUSG00000048022	Tmem229a	chr6:24951140-24956297	78.8368	118.289	-0.585373	5e-05	0.00141417
ENSMUST00000111214	ENSMUSG00000073489	Ifi204	chr1:173747292-173766876	1.17954	1.86076	-0.657675	0.0011	0.020454
ENSMUST00000178826	ENSMUSG00000028124	Gclm	chr3:122245556-122293547	32.0148	71.9536	-1.16833	5e-05	0.00141417
ENSMUST00000097973	ENSMUSG00000028571	Cyp2j13	chr4:96027533-96077546	36.1084	122.797	-1.76587	5e-05	0.00141417
ENSMUST00000168665	ENSMUSG00000032403	2300009A05Rik	chr9:63394446-63602493	13.3777	21.059	-0.654604	0.0017	0.0293704
ENSMUST00000046549	ENSMUSG00000040694	Apobec2	chr17:48419230-48432728	0.524858	1.42886	-1.44486	0.00015	0.00378624
ENSMUST00000042042	ENSMUSG00000035699	Slc51a	chr16:32475521-32487879	27.34	56.5967	-1.0497	5e-05	0.00141417
ENSMUST00000043396	ENSMUSG00000037169	Mycn	chr12:12936095-12941914	0.387799	0.715061	-0.882757	0.0022	0.0361992
ENSMUST00000022853	ENSMUSG00000058914	C1qtnf3	chr15:10952331-10980150	19.9513	85.547	-2.10024	5e-05	0.00141417
ENSMUST00000037360	ENSMUSG00000034226	Rhov	chr2:119269200-119271272	0.845326	3.23207	-1.93488	5e-05	0.00141417
ENSMUST00000036019	ENSMUSG00000034687	Fras1	chr5:96373954-96784728	5.77612	8.09707	-0.487301	5e-05	0.00141417
ENSMUST00000171765	ENSMUSG00000024386	Proc	chr18:32123128-32139570	37.3216	80.882	-1.11581	5e-05	0.00141417
ENSMUST00000114547	ENSMUSG00000032076	Cadm1	chr9:47530172-47857637	4.22614	7.74395	-0.873729	5e-05	0.00141417
ENSMUST00000019992	ENSMUSG00000019846	Lama4	chr10:38965514-39110188	0.852141	2.01923	-1.24464	5e-05	0.00141417
ENSMUST00000016106	ENSMUSG00000015962	1700016C15Rik	chr1:177729813-177753324	18.2735	26.0388	-0.510915	0.0002	0.00485099
ENSMUST00000029810	ENSMUSG00000053897	Slc39a8	chr3:135825278-135888572	0.866259	2.7102	-1.64553	5e-05	0.00141417
ENSMUST00000072697	ENSMUSG00000062908	Acadm	chr3:153922356-153944632	272.708	378.216	-0.471852	5e-05	0.00141417
ENSMUST00000180196	ENSMUSG00000053897	Slc39a8	chr3:135825278-135888572	4.54118	11.2236	-1.3054	5e-05	0.00141417
ENSMUST00000052209	ENSMUSG00000031885	Cbfb	chr8:105170673-105217989	3.67971	5.40216	-0.553944	0.00195	0.0327838
ENSMUST00000040656	ENSMUSG00000038286	Bphl	chr13:34037640-34074074	142.54	182.758	-0.358571	0.001	0.0189868
ENSMUST00000093893	ENSMUSG00000050730	Arhgap42	chr9:8994328-9260883	17.2398	24.0114	-0.477974	5e-05	0.00141417
ENSMUST00000091237	ENSMUSG00000031441	Atp11a	chr8:12757013-12868728	21.8729	91.3534	-2.06232	5e-05	0.00141417
ENSMUST00000167753	ENSMUSG00000090817	Gm4450	chr3:98445674-98457126	41.1485	69.6441	-0.759161	5e-05	0.00141417
ENSMUST00000027650	ENSMUSG00000026399	Cd55	chr1:130439026-130462744	2.08937	5.88132	-1.49307	5e-05	0.00141417
ENSMUST00000027381	ENSMUSG00000026189	Pecr	chr1:72244020-72284314	268.643	494.228	-0.879486	5e-05	0.00141417
ENSMUST00000030261	ENSMUSG00000028536	2610528J11Rik	chr4:118526998-118530228	47.429	65.6599	-0.469244	5e-05	0.00141417
ENSMUST00000025523	ENSMUSG00000024621	Csf1r	chr18:61105571-61177050	4.00402	10.1745	-1.34544	5e-05	0.00141417
ENSMUST00000072818	ENSMUSG00000061906	Ugt2b38	chr5:87409941-87424203	275.279	982.85	-1.83608	5e-05	0.00141417
ENSMUST00000054344	ENSMUSG00000035245	Eogt	chr6:97110023-97149182	4.55907	7.22333	-0.663923	5e-05	0.00141417
ENSMUST00000033930	ENSMUSG00000031530	Dusp4	chr8:34807296-34819894	4.29203	6.65524	-0.632829	5e-05	0.00141417
ENSMUST00000058265	ENSMUSG00000048970	C1galt1c1	chrX:38630784-38635087	17.3993	25.9737	-0.578024	5e-05	0.00141417
ENSMUST00000098192	ENSMUSG00000073940	Hbb-bt	chr7:103812523-103813996	0.902333	4.005	-2.15007	5e-05	0.00141417
ENSMUST00000115096	ENSMUSG00000029765	Plxna4	chr6:32144267-32588192	1.02695	1.4772	-0.524506	5e-05	0.00141417
ENSMUST00000094993	ENSMUSG00000070923	Klhl9	chr4:88718291-88722842	34.7841	48.963	-0.493266	5e-05	0.00141417
ENSMUST00000041317	ENSMUSG00000042225	Ammecr1	chrX:142851145-142966728	1.25578	1.85157	-0.560172	0.00015	0.00378624
ENSMUST00000043317	ENSMUSG00000036764	Dnajc12	chr10:63382442-63408840	110.578	151.57	-0.454921	0.0001	0.00265335
ENSMUST00000033775	ENSMUSG00000031402	Mpp1	chrX:75095853-75131016	31.9465	47.0453	-0.558394	0.00015	0.00378624
ENSMUST00000179685	ENSMUSG00000096546	Smlr1	chr10:25527942-25536267	12.359	23.4767	-0.925664	5e-05	0.00141417
ENSMUST00000001547	ENSMUSG00000001506	Col1a1	chr11:94936223-94953042	1.49502	2.73909	-0.873537	5e-05	0.00141417
ENSMUST00000032429	ENSMUSG00000030291	Med21	chr6:146642546-146650602	19.3204	29.2146	-0.596568	5e-05	0.00141417
ENSMUST00000052740	ENSMUSG00000046603	Tcaim	chr9:122805538-122836334	16.4528	25.9261	-0.656074	5e-05	0.00141417
ENSMUST00000107050	ENSMUSG00000028088	Fmo5	chr3:97628803-97655282	1.73019	4.08994	-1.24115	5e-05	0.00141417
ENSMUST00000131070	ENSMUSG00000056999	Ide	chr19:37268742-37330613	23.4406	31.2005	-0.412559	0.00025	0.00588258
ENSMUST00000014578	ENSMUSG00000059481	Plg	chr17:12378608-12419384	0.149165	0.609158	-2.0299	5e-05	0.00141417
ENSMUST00000036355	ENSMUSG00000033149	Phldb2	chr16:45746242-46010218	36.3946	54.2011	-0.574598	5e-05	0.00141417
ENSMUST00000192045	ENSMUSG00000103034	Gm8797	chr3:5750805-5751295	77.7817	115.056	-0.564835	5e-05	0.00141417
ENSMUST00000043843	ENSMUSG00000038366	Lasp1	chr11:97798999-97838764	21.9207	27.8196	-0.343808	0.0018	0.0306903
ENSMUST00000165232	ENSMUSG00000002944	Cd36	chr5:17781689-17888801	5.73451	52.3444	-3.19029	5e-05	0.00141417
ENSMUST00000042857	ENSMUSG00000038331	Satb2	chr1:56793980-56978650	0.82116	1.67804	-1.03104	0.00305	0.0468446
ENSMUST00000030014	ENSMUSG00000028330	Ncbp1	chr4:46038934-46196311	10.5398	15.3294	-0.540453	0.0009	0.0174274
ENSMUST00000030011	ENSMUSG00000028327	Stra6l	chr4:45848663-45887008	1.81315	4.88102	-1.42868	5e-05	0.00141417
ENSMUST00000102546	ENSMUSG00000037157	Il22ra1	chr4:135728171-135752140	1.61091	2.54556	-0.66011	0.0001	0.00265335
ENSMUST00000027499	ENSMUSG00000026278	Bok	chr1:93685659-93695764	4.01343	6.27475	-0.644721	0.00015	0.00378624
ENSMUST00000023448	ENSMUSG00000022763	Aifm3	chr16:17489610-17507485	4.29929	6.57278	-0.612407	5e-05	0.00141417
ENSMUST00000031005	ENSMUSG00000029122	Evc	chr5:37241939-37336894	31.0606	47.4235	-0.610518	5e-05	0.00141417
ENSMUST00000166852	ENSMUSG00000091742	Gm5093	chr17:46439577-46440099	0	0.376294	#NAME?	0.00145	0.0257185
ENSMUST00000015540	ENSMUSG00000015396	Cd83	chr13:43785106-43803130	0.524997	1.18282	-1.17185	5e-05	0.00141417
ENSMUST00000048568	ENSMUSG00000042106	Fam212a	chr9:107984222-107985879	1.02493	1.93907	-0.919845	0.00135	0.0242813
ENSMUST00000114160	ENSMUSG00000001962	Fam50a	chrX:74313032-74320149	15.6206	20.3293	-0.380109	0.00295	0.0455823
ENSMUST00000110855	ENSMUSG00000026623	Lpgat1	chr1:191717833-191784255	18.0913	26.8064	-0.567279	5e-05	0.00141417
ENSMUST00000085102	ENSMUSG00000032578	Cish	chr9:107296025-107302784	3.57112	5.88982	-0.721844	5e-05	0.00141417
ENSMUST00000179433	ENSMUSG00000037263	Aldh3b3	chr19:3958644-3972103	0.094567	0.41783	-2.14351	5e-05	0.00141417
ENSMUST00000162366	ENSMUSG00000029207	Apbb2	chr5:66298724-66618784	2.96305	5.45706	-0.881039	0.00135	0.0242813
ENSMUST00000029125	ENSMUSG00000027599	Armc1	chr3:19131401-19163065	18.4857	24.2423	-0.391116	0.00035	0.00785859
ENSMUST00000072899	ENSMUSG00000032232	Cgnl1	chr9:71626508-71771602	74.5868	94.8251	-0.346348	0.003	0.0461893
ENSMUST00000105466	ENSMUSG00000019916	P4ha1	chr10:59323295-59373304	7.05017	12.3654	-0.810579	5e-05	0.00141417
ENSMUST00000070139	ENSMUSG00000056162	Cndp1	chr18:84610508-84650084	26.6428	34.6	-0.377027	0.0006	0.0124324
ENSMUST00000032508	ENSMUSG00000030357	Fkbp4	chr6:128430102-128438677	75.4501	95.3305	-0.337416	0.00245	0.0394568
ENSMUST00000105854	ENSMUSG00000037139	Myom3	chr4:135759714-135815564	0.122663	0.507797	-2.04955	5e-05	0.00141417
ENSMUST00000099241	ENSMUSG00000074715	Ccl28	chr13:119623818-119654354	0.321903	1.59793	-2.3115	5e-05	0.00141417
ENSMUST00000115366	ENSMUSG00000024597	Slc12a2	chr18:57878677-57946821	12.9889	18.7342	-0.528397	5e-05	0.00141417
ENSMUST00000067700	ENSMUSG00000058690	Ccser2	chr14:36874935-36968777	28.698	47.1734	-0.717022	5e-05	0.00141417
ENSMUST00000097352	ENSMUSG00000006705	Pknox1	chr17:31564748-31607684	3.82556	5.32701	-0.477657	0.00225	0.0368149
ENSMUST00000040110	ENSMUSG00000034612	Chst11	chr10:82985497-83195900	8.84876	17.8651	-1.0136	5e-05	0.00141417
ENSMUST00000169095	ENSMUSG00000002944	Cd36	chr5:17781689-17888801	18.3667	129.091	-2.81323	5e-05	0.00141417
ENSMUST00000028347	ENSMUSG00000026970	Rbms1	chr2:60750192-60963192	7.90954	10.9471	-0.468883	0.00015	0.00378624
ENSMUST00000002091	ENSMUSG00000002015	Bcap31	chrX:73686177-73716175	75.4093	98.7132	-0.388499	0.00055	0.0115424
ENSMUST00000030381	ENSMUSG00000028633	Ctps	chr4:120539867-120570276	7.75032	10.3595	-0.41863	0.0007	0.0141397
ENSMUST00000015333	ENSMUSG00000015189	Casd1	chr6:4600838-4643355	8.74764	11.1461	-0.349581	0.0029	0.0449794
ENSMUST00000033873	ENSMUSG00000031483	Erlin2	chr8:27023798-27039433	36.8641	46.5317	-0.335997	0.0022	0.0361992
ENSMUST00000115443	ENSMUSG00000009376	Met	chr6:17463799-17573980	26.8086	57.0371	-1.08921	5e-05	0.00141417
ENSMUST00000005003	ENSMUSG00000004880	Lbr	chr1:181815334-181843046	12.8272	19.1464	-0.577868	5e-05	0.00141417
ENSMUST00000170579	ENSMUSG00000038528	BC021785	chr10:39946906-39986646	41.3814	74.956	-0.857061	5e-05	0.00141417
ENSMUST00000127405	ENSMUSG00000001056	Nhp2	chr11:51619734-51635896	21.8244	39.3028	-0.848694	5e-05	0.00141417
ENSMUST00000112525	ENSMUSG00000054580	Pla2r1	chr2:60417542-60553308	1.47294	1.99476	-0.437515	0.00215	0.0355551
