# Supplementary material for: Altered Expression of Long Noncoding and Messenger RNAs in Diabetic Nephropathy following Treatment with Rosiglitazone
Source: Biomed Res Int. 2020 Jan 12;2020:1360843. doi: 10.1155/2020/1360843 (PMC6983290; doi:10.1155/2020/1360843)
Supplement: Supplementary Materials — Supplementary Table 1: significantly upregulated mRNAs in dbdb mice compared to the control group. Supplementary Table 2: significantly downregulated mRNAs in dbdb mice compared to the control group. Supplementary Table 3: significantly upregulated mRNAs in dbR mice compared to the dbdb group. Supplementary Table 4: significantly downregulated mRNAs in dbR mice compared to the dbdb group. Supplementary Table 5: mRNAs significantly upregulated by diabetic nephropathy yet reversed following rosiglitazone treatment. Supplementary Table 6: mRNAs significantly downregulated by diabetic nephropathy yet reversed following rosiglitazone treatment. Supplementary Table 7: significantly upregulated lncRNAs in dbdb mice compared to the control group. Supplementary Table 8: significantly downregulated lncRNAs in dbdb mice compared to the control group. Supplementary Table 9: significantly upregulated lncRNAs in dbR mice compared to the dbdb group. Supplementary Table 10: significantly downregulated lncRNAs in dbR mice compared to the dbdb group. Supplementary Table 11: lncRNAs significantly upregulated by diabetic nephropathy yet reversed following rosiglitazone treatment. Supplementary Table 12: lncRNAs significantly downregulated by diabetic nephropathy yet reversed following rosiglitazone treatment. Supplementary Table 13: differentially expressed lncRNAs colocated with genes. Supplementary Table 14: differentially expressed lncRNAs coexpressed with genes. Supplementary Table 15: top 20 significantly enriched GO terms associated with differentially expressed mRNAs in the kidneys of dbdb mice compared to the controls. Supplementary Table 16: top 20 significantly enriched GO terms associated with differentially expressed mRNAs in the kidneys of dbR mice compared to the dbdb group. Supplementary Table 17: top 20 significantly enriched GO terms associated with differentially expressed lncRNAs coexpressed with genes in the kidneys of dbdb mice compared to the controls. Supplementa [file 1360843.f1.zip › 1360843.f1/Supplementary Table 3.xls]

## Sheet: Table S3 mRNA_dbR_vs_dbdb.DE_UP
Supplementary Table 3 Significantly up-regulated mRNAs in dbR mice compared to the dbdb group
transcript_id	gene_id	gene_name	gene_location	dbR_FPKM	dbdb_FPKM	log2(foldchange)	pvalue	qvalue
ENSMUST00000204659	ENSMUSG00000005364	Il5ra	chr6:106710356-106749037	1.25549	0.643533	0.964166	0.0014	0.0250158
ENSMUST00000042792	ENSMUSG00000034810	Scn7a	chr2:66673424-66784914	1.98375	1.07768	0.880296	5e-05	0.00141417
ENSMUST00000005532	ENSMUSG00000005397	Nid1	chr13:13437601-13512275	16.5882	9.62093	0.785911	5e-05	0.00141417
ENSMUST00000021413	ENSMUSG00000021025	Nfkbia	chr12:55489410-55492647	27.5008	20.8662	0.398306	0.00095	0.0182319
ENSMUST00000038769	ENSMUSG00000040808	S100g	chrX:162901237-163032508	2237.9	1728.38	0.372723	0.00175	0.0300127
ENSMUST00000148020	ENSMUSG00000044816	D630023F18Rik	chr1:65100388-65123214	46.0404	32.3549	0.508917	0.00075	0.0149651
ENSMUST00000020403	ENSMUSG00000020186	Csrp2	chr10:110920176-110939599	142.048	107.172	0.406458	0.0002	0.00485099
ENSMUST00000021757	ENSMUSG00000021322	Aoah	chr13:20794118-21024252	41.8814	29.9561	0.483463	5e-05	0.00141417
ENSMUST00000029331	ENSMUSG00000027765	P2ry1	chr3:61002794-61008982	1.58	0.788053	1.00356	0.00295	0.0455823
ENSMUST00000041767	ENSMUSG00000037410	Tbc1d2b	chr9:90163068-90270771	3.98171	2.99404	0.411292	0.0021	0.034862
ENSMUST00000109410	ENSMUSG00000031886	Ces2e	chr8:104926259-104934672	7.30286	5.06402	0.52818	0.00055	0.0115424
ENSMUST00000073261	ENSMUSG00000061991	Hist1h2af	chr13:23533905-23534304	7.77061	3.29502	1.23774	0.0007	0.0141397
ENSMUST00000111589	ENSMUSG00000045392	Olfr1033	chr2:86041316-86042249	1.12805	0.483564	1.22205	0.0033	0.0499537
ENSMUST00000035931	ENSMUSG00000037892	Pcdh18	chr3:49743295-49757316	2.47116	1.38004	0.840483	5e-05	0.00141417
ENSMUST00000070215	ENSMUSG00000056209	Npm3	chr19:45747733-45749591	19.4103	14.1619	0.454807	0.00135	0.0242813
ENSMUST00000057019	ENSMUSG00000044338	Aplnr	chr2:85136224-85139923	1.15329	0.628609	0.875517	0.0001	0.00265335
ENSMUST00000066991	ENSMUSG00000054136	Adm2	chr15:89322971-89324728	1.92369	0.91685	1.06912	0.00035	0.00785859
ENSMUST00000112871	ENSMUSG00000061353	Cxcl12	chr6:117168534-117181367	19.5013	12.6221	0.627624	0.0007	0.0141397
ENSMUST00000026700	ENSMUSG00000025610	Map3k7cl	chr16:87553329-87595336	13.5658	9.78812	0.470869	0.0005	0.0106375
ENSMUST00000023282	ENSMUSG00000022613	Miox	chr15:89334397-89337015	1691.64	1231.79	0.457665	0.00015	0.00378624
ENSMUST00000033741	ENSMUSG00000031375	Bgn	chrX:73483601-73495933	54.745	33.0833	0.726623	5e-05	0.00141417
ENSMUST00000107088	ENSMUSG00000030737	Slco2b1	chr7:99657803-99711340	6.59563	3.87698	0.766578	5e-05	0.00141417
ENSMUST00000090070	ENSMUSG00000054435	Gimap4	chr6:48684548-48692060	20.081	14.1267	0.507402	0.00015	0.00378624
ENSMUST00000103194	ENSMUSG00000000805	Car4	chr11:84957787-84966044	81.8652	51.099	0.679954	5e-05	0.00141417
ENSMUST00000103191	ENSMUSG00000028936	Rpl22	chr4:152325852-152334071	340.27	255.93	0.410929	0.00175	0.0300127
ENSMUST00000102822	ENSMUSG00000025969	Nrp2	chr1:62703284-62818695	3.43701	2.20368	0.64124	0.0026	0.0414406
ENSMUST00000034756	ENSMUSG00000032231	Anxa2	chr9:69453619-69491795	21.5618	16.1262	0.419077	0.00105	0.019753
ENSMUST00000028663	ENSMUSG00000027230	Creb3l1	chr2:91982327-92024502	1.19037	0.602646	0.982032	0.0001	0.00265335
ENSMUST00000017453	ENSMUSG00000017309	Cd300lg	chr11:102041508-102055620	13.7168	9.98209	0.458534	0.00245	0.0394568
ENSMUST00000030964	ENSMUSG00000029084	Cd38	chr5:43868552-43912375	4.03899	2.82493	0.515781	0.00035	0.00785859
ENSMUST00000072271	ENSMUSG00000019232	Etnppl	chr3:130617447-130637521	1.51363	0.943572	0.68181	0.00215	0.0355551
ENSMUST00000182858	ENSMUSG00000098132	Rassf10	chr7:112953961-112957457	0.85233	0.530626	0.683717	0.00155	0.0272269
ENSMUST00000114763	ENSMUSG00000022816	Fstl1	chr16:37776872-37836514	7.42315	5.60366	0.405663	0.00135	0.0242813
ENSMUST00000000579	ENSMUSG00000000567	Sox9	chr11:112782223-112787760	0.573478	0.324598	0.821086	0.0011	0.020454
ENSMUST00000021810	ENSMUSG00000021379	Id4	chr13:48044230-48264036	16.2738	9.31615	0.804745	5e-05	0.00141417
ENSMUST00000025249	ENSMUSG00000024391	Apom	chr17:35128996-35132050	68.2119	45.4709	0.585079	5e-05	0.00141417
ENSMUST00000034178	ENSMUSG00000031725	Ces1f	chr8:93256235-93279747	234.83	176.49	0.412032	0.00025	0.00588258
ENSMUST00000034173	ENSMUSG00000061959	Ces1e	chr8:93201217-93229619	57.2284	43.1387	0.40775	0.00185	0.031399
ENSMUST00000015511	ENSMUSG00000030123	Plxnd1	chr6:115954810-115995005	7.4397	5.33821	0.478889	0.0001	0.00265335
ENSMUST00000115728	ENSMUSG00000024349	Tmem173	chr18:35733677-35740554	1.21428	0.713705	0.766706	0.0012	0.0220581
ENSMUST00000092163	ENSMUSG00000069516	Lyz2	chr10:117277333-117282274	8.67883	6.04549	0.521641	0.0009	0.0174274
ENSMUST00000035390	ENSMUSG00000037053	Azgp1	chr5:137981538-137990233	55.8281	29.5199	0.919302	5e-05	0.00141417
ENSMUST00000031897	ENSMUSG00000029864	Gstk1	chr6:42245934-42250441	85.1941	60.9549	0.483011	5e-05	0.00141417
ENSMUST00000080861	ENSMUSG00000062997	Rpl35	chr2:38998318-39005624	270.652	209.549	0.369153	0.00095	0.0182319
ENSMUST00000060598	ENSMUSG00000044249	Defb29	chr2:152538713-152540098	70.5083	47.4057	0.572732	0.0001	0.00265335
ENSMUST00000031668	ENSMUSG00000029661	Col1a2	chr6:4504813-4541544	8.80582	5.56799	0.6613	5e-05	0.00141417
ENSMUST00000012587	ENSMUSG00000012443	Kif11	chr19:37376402-37421859	0.674318	0.366676	0.878923	0.0002	0.00485099
ENSMUST00000046522	ENSMUSG00000040283	Btnl9	chr11:49165584-49187159	4.58586	1.90395	1.26819	5e-05	0.00141417
ENSMUST00000029046	ENSMUSG00000027533	Fabp5	chr3:10012547-10016607	4.6086	2.63935	0.804146	0.0004	0.00878381
ENSMUST00000029041	ENSMUSG00000062515	Fabp4	chr3:10204087-10208576	44.9093	25.8917	0.794522	5e-05	0.00141417
ENSMUST00000074072	ENSMUSG00000069117	Gm10260	chr13:97760129-97760588	263.409	205.613	0.357369	0.00145	0.0257185
ENSMUST00000001147	ENSMUSG00000001119	Col6a1	chr10:76708791-76726168	8.08144	4.32526	0.901824	5e-05	0.00141417
ENSMUST00000054538	ENSMUSG00000051517	Arhgef39	chr4:43496141-43499695	5.69108	3.58218	0.667865	5e-05	0.00141417
ENSMUST00000004673	ENSMUSG00000004558	Ndrg2	chr14:51905270-51913488	21.4361	15.0343	0.511784	0.0004	0.00878381
ENSMUST00000024988	ENSMUSG00000024164	C3	chr17:57203969-57228136	37.4068	22.7388	0.718142	5e-05	0.00141417
ENSMUST00000024984	ENSMUSG00000024168	Tmem204	chr17:25016090-25099487	15.1601	10.5607	0.521579	0.00225	0.0368149
ENSMUST00000078869	ENSMUSG00000071177	Serpina1d	chr12:103728155-103830373	72.9407	50.1955	0.539165	5e-05	0.00141417
ENSMUST00000115383	ENSMUSG00000062980	Cped1	chr6:21985915-22256404	2.44943	1.79647	0.447282	0.00235	0.038101
ENSMUST00000134825	ENSMUSG00000090122	Kcne1l	chrX:142304751-142306294	1.5072	0.783652	0.943589	0.00045	0.009687
ENSMUST00000059193	ENSMUSG00000048376	F2r	chr13:95601803-95618459	29.5033	20.521	0.523775	5e-05	0.00141417
ENSMUST00000022428	ENSMUSG00000021876	Rnase4	chr14:51091076-51106151	4.44751	2.82206	0.656249	0.001	0.0189868
ENSMUST00000034594	ENSMUSG00000032089	Il10ra	chr9:45253836-45269149	0.904952	0.526801	0.780584	0.00075	0.0149651
ENSMUST00000032342	ENSMUSG00000030218	Mgp	chr6:136872434-136875823	74.2775	45.6295	0.702959	5e-05	0.00141417
ENSMUST00000029440	ENSMUSG00000027848	Olfml3	chr3:103731664-103738001	3.73151	2.45436	0.604413	5e-05	0.00141417
ENSMUST00000046687	ENSMUSG00000038156	Spon1	chr7:113765997-114043370	3.4903	2.65325	0.395591	0.0026	0.0414406
ENSMUST00000012348	ENSMUSG00000040562	Gstm2	chr3:107981701-107986453	28.6813	19.2581	0.574648	5e-05	0.00141417
ENSMUST00000093508	ENSMUSG00000070034	Sp110	chr1:85575675-85598817	1.66676	1.03029	0.694	0.00135	0.0242813
ENSMUST00000027675	ENSMUSG00000026417	Pigr	chr1:130826683-130852249	106.306	75.8117	0.487727	0.00035	0.00785859
ENSMUST00000026886	ENSMUSG00000025780	Itih5	chr2:10153570-10256529	14.4342	8.30177	0.797996	5e-05	0.00141417
ENSMUST00000064862	ENSMUSG00000054385	Ceacam2	chr7:25516041-25539857	2.40326	0.894232	1.42627	5e-05	0.00141417
ENSMUST00000032518	ENSMUSG00000030364	Clec2h	chr6:128662384-128677374	10.6877	5.83429	0.873316	5e-05	0.00141417
ENSMUST00000067853	ENSMUSG00000054675	Tmem119	chr5:113793728-113800516	3.3333	2.20714	0.59477	0.0005	0.0106375
ENSMUST00000049149	ENSMUSG00000040249	Lrp1	chr10:127538160-127621148	11.5819	7.56112	0.615197	5e-05	0.00141417
ENSMUST00000029671	ENSMUSG00000028037	Ifi44	chr3:151730921-151749960	4.27775	3.08024	0.473808	0.001	0.0189868
ENSMUST00000168727	ENSMUSG00000021943	Gdf10	chr14:33923586-33935280	2.23008	1.46121	0.609924	0.0011	0.020454
ENSMUST00000092058	ENSMUSG00000074639	BC089597	chr10:127866473-127877317	185.303	87.9381	1.07533	5e-05	0.00141417
ENSMUST00000087978	ENSMUSG00000067586	S1pr3	chr13:51408617-51422797	3.09459	1.67565	0.885027	5e-05	0.00141417
ENSMUST00000080995	ENSMUSG00000060044	Tmem26	chr10:68723745-68782654	6.98798	4.64244	0.589993	5e-05	0.00141417
ENSMUST00000026565	ENSMUSG00000025492	Ifitm3	chr7:141009585-141010770	42.1315	30.7338	0.455071	0.0009	0.0174274
ENSMUST00000080204	ENSMUSG00000070031	Sp140	chr1:85600702-85645037	1.03498	0.600549	0.785246	0.0018	0.0306903
ENSMUST00000091741	ENSMUSG00000069301	Hist1h2ag	chr13:22042459-22042944	4.3995	2.21048	0.992978	0.00315	0.0481278
ENSMUST00000169681	ENSMUSG00000058655	Eif4b	chr15:102073772-102097172	141.564	109.982	0.364188	0.00145	0.0257185
ENSMUST00000112700	ENSMUSG00000025268	Maged2	chrX:150806369-150814345	6.06305	3.93365	0.624176	0.00085	0.0165966
ENSMUST00000080813	ENSMUSG00000061787	Rps17	chr7:81342732-81345254	1093.48	827.972	0.401277	5e-05	0.00141417
ENSMUST00000022946	ENSMUSG00000022323	Hrsp12	chr15:34484020-34495255	1130.23	885.505	0.352042	0.00275	0.0432258
ENSMUST00000022947	ENSMUSG00000022324	Matn2	chr15:34306679-34436242	2.34352	1.54695	0.599254	0.003	0.0461893
ENSMUST00000001566	ENSMUSG00000001525	Tubb5	chr17:35833920-35838306	22.6846	17.7133	0.356881	0.00145	0.0257185
ENSMUST00000204267	ENSMUSG00000009281	Rarres2	chr6:48554795-48572789	16.592	7.33402	1.17781	5e-05	0.00141417
ENSMUST00000029567	ENSMUSG00000027955	Fam198b	chr3:79884532-79946280	0.671975	0.434003	0.630702	0.00115	0.0213015
ENSMUST00000045560	ENSMUSG00000038496	Slc19a3	chr1:83012522-83038448	12.0165	7.31928	0.715243	5e-05	0.00141417
ENSMUST00000099703	ENSMUSG00000075031	Hist1h2bb	chr13:23746789-23747241	18.0413	11.4041	0.661754	0.00155	0.0272269
ENSMUST00000090821	ENSMUSG00000038777	Sema6c	chr3:95160500-95174024	0.499035	0.238622	1.06441	0.00195	0.0327838
ENSMUST00000166187	ENSMUSG00000019232	Etnppl	chr3:130617447-130637521	4.00323	2.27744	0.813754	0.0008	0.0157593
ENSMUST00000020704	ENSMUSG00000020429	Igfbp1	chr11:7197781-7202546	6.99814	4.00394	0.805551	5e-05	0.00141417
ENSMUST00000045008	ENSMUSG00000033634	Cml2	chr6:85865421-85869158	17.9093	13.9415	0.361328	0.0015	0.0264906
ENSMUST00000087441	ENSMUSG00000029086	Prom1	chr5:43993619-44102032	35.475	25.4104	0.481383	0.00015	0.00378624
ENSMUST00000022398	ENSMUSG00000021850	1700011H14Rik	chr14:49226357-49245428	121.755	87.0661	0.483803	5e-05	0.00141417
ENSMUST00000059091	ENSMUSG00000056025	Clca3a1	chr3:144729915-144760841	23.7439	16.4639	0.528249	5e-05	0.00141417
ENSMUST00000061799	ENSMUSG00000032334	Loxl1	chr9:58287722-58313212	6.16063	3.85415	0.676666	5e-05	0.00141417
ENSMUST00000092584	ENSMUSG00000069662	Marcks	chr10:37133374-37138920	9.44537	5.81682	0.699376	5e-05	0.00141417
ENSMUST00000092639	ENSMUSG00000019899	Lama2	chr10:26981284-27616843	4.23965	2.52004	0.750496	5e-05	0.00141417
ENSMUST00000077856	ENSMUSG00000063316	Rpl27	chr11:101442297-101445529	360.185	283.299	0.346412	0.00205	0.0341843
ENSMUST00000076817	ENSMUSG00000019820	Utrn	chr10:12382187-12861735	9.67683	7.71715	0.326467	0.0029	0.0449794
ENSMUST00000020118	ENSMUSG00000019960	Dusp6	chr10:99263230-99267488	19.819	15.5467	0.350275	0.00225	0.0368149
ENSMUST00000058125	ENSMUSG00000050071	Bex1	chrX:136213971-136226100	3.14958	1.73708	0.858494	0.00225	0.0368149
ENSMUST00000055619	ENSMUSG00000043099	Hic1	chr11:75164564-75169519	1.79269	1.07395	0.739199	5e-05	0.00141417
ENSMUST00000022746	ENSMUSG00000022146	Osmr	chr15:6813576-6874969	3.10442	2.18074	0.509508	0.0003	0.00690244
ENSMUST00000023835	ENSMUSG00000023073	Slc10a2	chr8:5085622-5105232	18.4905	14.2128	0.37959	0.00265	0.0420006
ENSMUST00000036439	ENSMUSG00000039385	Cdh6	chr15:13034199-13173639	1.33361	0.801612	0.734362	0.0004	0.00878381
ENSMUST00000043944	ENSMUSG00000055489	Ano5	chr7:51511028-51598709	0.508401	0.265173	0.939031	5e-05	0.00141417
ENSMUST00000115231	ENSMUSG00000079641	Rpl39	chrX:37082519-37085402	307.572	238.434	0.367333	0.0009	0.0174274
ENSMUST00000194690	ENSMUSG00000026674	Ddr2	chr1:169969408-170110729	1.32497	0.435507	1.60519	0.00075	0.0149651
ENSMUST00000078357	ENSMUSG00000022505	Emp2	chr16:10281748-10313968	3.20648	2.36285	0.440462	0.00325	0.0493611
ENSMUST00000165485	ENSMUSG00000024909	Efemp2	chr19:5473972-5481853	2.92971	1.73388	0.756749	0.00205	0.0341843
ENSMUST00000026190	ENSMUSG00000025185	Loxl4	chr19:42593981-42612813	0.986979	0.433181	1.18805	5e-05	0.00141417
ENSMUST00000113516	ENSMUSG00000062960	Kdr	chr5:75932826-75978458	28.498	19.8807	0.519494	5e-05	0.00141417
ENSMUST00000098782	ENSMUSG00000060594	Layn	chr9:51056779-51077094	1.18263	0.660883	0.839531	0.00215	0.0355551
ENSMUST00000161737	ENSMUSG00000016194	Hsd11b1	chr1:193207724-193343878	34.3865	19.6621	0.806429	0.00255	0.0407945
ENSMUST00000062356	ENSMUSG00000047945	Marcksl1	chr4:129513580-129515985	5.64459	3.61355	0.643452	0.0002	0.00485099
ENSMUST00000022861	ENSMUSG00000072664	Ugt3a1	chr15:9279828-9315032	136.106	99.6574	0.449677	0.00015	0.00378624
ENSMUST00000204214	ENSMUSG00000004988	Fxyd4	chr6:117933558-117937692	13.6453	6.99318	0.964382	0.0008	0.0157593
ENSMUST00000028241	ENSMUSG00000026880	Stom	chr2:35313985-35336976	3.75646	2.44803	0.617756	0.00015	0.00378624
ENSMUST00000100335	ENSMUSG00000020695	Mrc2	chr11:105292645-105351139	5.32724	3.37026	0.66053	5e-05	0.00141417
ENSMUST00000098761	ENSMUSG00000040896	Kcnd3	chr3:105452329-105674002	0.890199	0.599855	0.569514	0.00225	0.0368149
ENSMUST00000144408	ENSMUSG00000043017	Ptgir	chr7:16906489-16910905	0.530554	0.147528	1.84652	5e-05	0.00141417
ENSMUST00000117160	ENSMUSG00000031841	Cdh13	chr8:118283732-119324921	1.32454	0.527141	1.32923	5e-05	0.00141417
ENSMUST00000006544	ENSMUSG00000006378	Gcat	chr15:79030873-79043558	33.9733	26.9307	0.33515	0.0032	0.0487735
ENSMUST00000027643	ENSMUSG00000026394	Atp6v1g3	chr1:138273737-138289462	22.5278	15.6894	0.521914	5e-05	0.00141417
ENSMUST00000022629	ENSMUSG00000022048	Dpysl2	chr14:66802863-66868688	8.82543	6.88288	0.358655	0.00235	0.038101
ENSMUST00000198584	ENSMUSG00000050315	Synpo2	chr3:123076518-123236147	0.923226	0.491564	0.909306	5e-05	0.00141417
ENSMUST00000109225	ENSMUSG00000040413	Timd2	chr11:46668959-46707061	36.5545	23.7511	0.622055	5e-05	0.00141417
ENSMUST00000027056	ENSMUSG00000048960	Prex2	chr1:10993464-11303681	5.95999	4.46624	0.416247	0.00015	0.00378624
ENSMUST00000079081	ENSMUSG00000024411	Aqp4	chr18:15389393-15403684	7.36234	5.44182	0.436076	0.0003	0.00690244
ENSMUST00000079085	ENSMUSG00000062006	Rpl34	chr3:130726830-130730398	441.331	338.157	0.384167	0.00075	0.0149651
ENSMUST00000019683	ENSMUSG00000019539	Rcn3	chr7:45082913-45092213	6.15747	3.52903	0.803065	5e-05	0.00141417
ENSMUST00000001713	ENSMUSG00000001663	Gstt1	chr10:75783812-75798584	167.292	114.881	0.54223	5e-05	0.00141417
ENSMUST00000000369	ENSMUSG00000000359	Rem1	chr2:152626950-152635194	2.95716	1.96012	0.593267	0.002	0.0334664
ENSMUST00000194649	ENSMUSG00000039221	Rpl22l1	chr3:28805435-28813985	51.1007	31.0941	0.716703	5e-05	0.00141417
ENSMUST00000105473	ENSMUSG00000038602	Slc35f1	chr10:52690532-53111622	2.18453	1.55804	0.487593	0.00155	0.0272269
ENSMUST00000031565	ENSMUSG00000029581	Fscn1	chr5:142960342-142973185	2.93748	1.7075	0.78269	0.00015	0.00378624
ENSMUST00000112172	ENSMUSG00000049775	Tmsb4x	chrX:167207092-167209315	226.509	175.836	0.365339	0.0013	0.0235944
ENSMUST00000096431	ENSMUSG00000053852	Adgrg4	chrX:56870162-57001558	5.00643	2.23688	1.16229	5e-05	0.00141417
ENSMUST00000132151	ENSMUSG00000054752	Fsd1l	chr4:53631470-53707009	0.84583	0.522323	0.695426	0.0001	0.00265335
ENSMUST00000041045	ENSMUSG00000037894	H2afz	chr3:137864486-137866922	108.175	84.2938	0.359866	0.0012	0.0220581
ENSMUST00000120388	ENSMUSG00000024810	Il33	chr19:29919771-29960718	6.62652	4.45502	0.572819	5e-05	0.00141417
ENSMUST00000036877	ENSMUSG00000038456	Dennd2a	chr6:39462377-39557867	1.05063	0.632804	0.731427	0.0002	0.00485099
ENSMUST00000031093	ENSMUSG00000029193	Cckar	chr5:53697775-53707705	18.0123	13.0573	0.464127	5e-05	0.00141417
ENSMUST00000022718	ENSMUSG00000022122	Ednrb	chr14:103814624-103844173	4.13419	1.74194	1.24691	0.00155	0.0272269
ENSMUST00000034534	ENSMUSG00000032035	Ets1	chr9:32696021-32757820	9.90562	6.91121	0.519308	5e-05	0.00141417
ENSMUST00000034537	ENSMUSG00000032038	St3gal4	chr9:35046578-35116810	3.30259	2.29683	0.523952	0.00255	0.0407945
ENSMUST00000022995	ENSMUSG00000022366	Slc22a22	chr15:57243766-57477625	67.025	46.3723	0.531436	5e-05	0.00141417
ENSMUST00000113627	ENSMUSG00000079480	Pin4	chrX:102119446-102127669	78.6786	59.9701	0.391728	0.003	0.0461893
ENSMUST00000024031	ENSMUSG00000023262	Acy1	chr9:106432980-106438319	73.7963	47.6107	0.632262	5e-05	0.00141417
ENSMUST00000059980	ENSMUSG00000046330	Rpl37a	chr1:72711259-72713809	664.307	526.906	0.334305	0.0024	0.0387964
ENSMUST00000039026	ENSMUSG00000037010	Apln	chrX:48025145-48034853	1.02654	0.664696	0.62702	0.0029	0.0449794
ENSMUST00000075641	ENSMUSG00000057113	Npm1	chr11:33152286-33163206	115.144	84.6685	0.443542	0.0011	0.020454
ENSMUST00000037321	ENSMUSG00000039710	Slc7a12	chr3:14480696-14505830	14.0332	9.31681	0.590937	0.0002	0.00485099
ENSMUST00000164192	ENSMUSG00000071042	Rasgrp3	chr17:75435904-75529043	3.21622	2.27367	0.500342	0.00175	0.0300127
ENSMUST00000033310	ENSMUSG00000031004	Mki67	chr7:135689787-135716379	1.98347	0.928654	1.09482	5e-05	0.00141417
ENSMUST00000028897	ENSMUSG00000027408	Cpxm1	chr2:130390774-130397574	0.948349	0.457317	1.05222	0.0004	0.00878381
ENSMUST00000159861	ENSMUSG00000073530	Pappa2	chr1:158711726-158958367	0.911222	0.254493	1.84017	5e-05	0.00141417
ENSMUST00000043259	ENSMUSG00000041741	Pde3a	chr6:141249268-141507448	2.2622	1.47905	0.613053	0.0001	0.00265335
ENSMUST00000021971	ENSMUSG00000021509	Slc25a48	chr13:56438354-56474239	12.6293	9.52518	0.406957	0.0005	0.0106375
ENSMUST00000001319	ENSMUSG00000001300	Efnb2	chr8:8617433-8660773	5.31884	4.01378	0.40615	0.0013	0.0235944
ENSMUST00000052622	ENSMUSG00000056313	1810011O10Rik	chr8:24437179-24438984	22.6613	17.6906	0.357245	0.00235	0.038101
ENSMUST00000062893	ENSMUSG00000045328	Cenpe	chr3:135212536-135273611	0.450056	0.28767	0.645692	0.0018	0.0306903
ENSMUST00000022612	ENSMUSG00000022033	Pbk	chr14:65805836-65817822	1.04861	0.480735	1.12517	0.0005	0.0106375
ENSMUST00000028280	ENSMUSG00000026837	Col5a1	chr2:27886424-28039514	2.16045	1.45833	0.567018	5e-05	0.00141417
ENSMUST00000018963	ENSMUSG00000018819	Lsp1	chr7:142460808-142516008	0.863385	0.227997	1.92099	0.0029	0.0449794
ENSMUST00000008016	ENSMUSG00000007872	Id3	chr4:136143496-136145392	50.3105	32.7536	0.619207	5e-05	0.00141417
ENSMUST00000022709	ENSMUSG00000022114	Spry2	chr14:105891948-105896819	6.34882	4.73956	0.421734	0.0033	0.0499537
ENSMUST00000009058	ENSMUSG00000028970	Abcb1b	chr5:8798185-8866315	8.17571	5.35136	0.61144	5e-05	0.00141417
ENSMUST00000034029	ENSMUSG00000031616	Ednra	chr8:77663030-77724436	0.893632	0.553258	0.691727	0.00105	0.019753
ENSMUST00000034026	ENSMUSG00000031613	Hpgd	chr8:56294551-56321046	3.99206	2.62	0.607568	0.00075	0.0149651
ENSMUST00000020702	ENSMUSG00000020427	Igfbp3	chr11:7206085-7213923	63.4619	42.7594	0.569649	5e-05	0.00141417
ENSMUST00000161198	ENSMUSG00000057103	Cml1	chr6:85910153-85930284	435.325	322.987	0.430617	0.0014	0.0250158
ENSMUST00000120990	ENSMUSG00000051041	Olfml1	chr7:107567445-107591094	6.13685	3.24001	0.921501	5e-05	0.00141417
ENSMUST00000071168	ENSMUSG00000006386	Tek	chr4:94739288-94874976	5.59933	3.35125	0.740554	0.00095	0.0182319
ENSMUST00000079400	ENSMUSG00000037686	Aspg	chr12:112106682-112127573	9.49558	7.12834	0.41369	0.0011	0.020454
ENSMUST00000147105	ENSMUSG00000027201	Myef2	chr2:125068123-125123661	2.9138	1.64279	0.826757	0.003	0.0461893
ENSMUST00000003947	ENSMUSG00000003849	Nqo1	chr8:107388224-107403206	44.3059	33.4911	0.403719	0.00015	0.00378624
ENSMUST00000074267	ENSMUSG00000061477	Rps7	chr12:28630846-28635953	317.217	241.191	0.395294	0.0004	0.00878381
ENSMUST00000034472	ENSMUSG00000031990	Jam3	chr9:27097384-27155421	18.5448	14.4764	0.357304	0.0029	0.0449794
ENSMUST00000014220	ENSMUSG00000014075	Tctex1d2	chr16:32419701-32429099	17.2909	12.7092	0.444137	0.00305	0.0468446
ENSMUST00000035115	ENSMUSG00000032528	Vipr1	chr9:121642715-121672954	1.07259	0.495405	1.11441	5e-05	0.00141417
ENSMUST00000048976	ENSMUSG00000033910	Gucy1a3	chr3:82092426-82145787	9.05903	6.32418	0.518478	5e-05	0.00141417
ENSMUST00000051209	ENSMUSG00000002265	Peg3	chr7:6703891-6730421	6.58868	4.5907	0.521276	5e-05	0.00141417
ENSMUST00000023538	ENSMUSG00000022836	Mylk	chr16:34784920-35002420	17.0471	12.0202	0.504062	5e-05	0.00141417
ENSMUST00000029753	ENSMUSG00000028108	Ecm1	chr3:95734146-95739569	11.7133	5.12247	1.19323	5e-05	0.00141417
ENSMUST00000097653	ENSMUSG00000048126	Col6a3	chr1:90765922-90843971	3.13914	1.95918	0.680123	5e-05	0.00141417
ENSMUST00000026917	ENSMUSG00000025810	Nrp1	chr8:128359072-128505462	23.2262	17.6913	0.392718	0.0002	0.00485099
ENSMUST00000030651	ENSMUSG00000028843	Sh3bgrl3	chr4:134102582-134128789	45.4573	34.6509	0.39162	0.0028	0.0438435
ENSMUST00000115733	ENSMUSG00000041624	Gucy1a2	chr9:3532353-3897342	3.55344	2.21759	0.680221	5e-05	0.00141417
ENSMUST00000044165	ENSMUSG00000039115	Itga9	chr9:118606689-118901003	2.86918	2.13401	0.427067	0.0012	0.0220581
ENSMUST00000022960	ENSMUSG00000022336	Eif3e	chr15:43250039-43282736	85.5702	67.0409	0.352066	0.00125	0.0228388
ENSMUST00000023611	ENSMUSG00000022894	Adamts5	chr16:85858169-85901125	4.70492	3.58686	0.391449	0.00115	0.0213015
ENSMUST00000034339	ENSMUSG00000031871	Cdh5	chr8:104101624-104144502	10.1528	7.94145	0.354399	0.00225	0.0368149
ENSMUST00000069423	ENSMUSG00000027239	Mdk	chr2:91929804-91932297	39.0177	29.3367	0.411419	0.0029	0.0449794
ENSMUST00000055355	ENSMUSG00000044921	Rassf9	chr10:102512221-102546560	2.68185	1.80698	0.569651	0.00235	0.038101
ENSMUST00000015712	ENSMUSG00000015568	Lpl	chr8:68880490-68906934	60.743	44.7723	0.440113	0.00015	0.00378624
ENSMUST00000047095	ENSMUSG00000037780	Mbl1	chr14:41151455-41158959	2.43399	0.955273	1.34934	5e-05	0.00141417
ENSMUST00000171929	ENSMUSG00000026605	Cenpf	chr1:189640605-189688086	0.477201	0.268934	0.827343	5e-05	0.00141417
ENSMUST00000055966	ENSMUSG00000031343	Gabra3	chrX:72432680-72656848	1.72747	0.997279	0.792595	5e-05	0.00141417
ENSMUST00000094760	ENSMUSG00000073758	Sh3d21	chr4:126150601-126163491	2.36211	1.24577	0.923035	0.00165	0.0286638
ENSMUST00000102707	ENSMUSG00000028713	Cyp4b1	chr4:115624724-115647723	843.659	575.507	0.551826	5e-05	0.00141417
ENSMUST00000113211	ENSMUSG00000079435	Rpl36a	chrX:134585653-134588056	349.633	267.814	0.384614	0.00035	0.00785859
ENSMUST00000068861	ENSMUSG00000096852	Cyp2d12	chr15:82555107-82559413	54.236	26.3059	1.04387	5e-05	0.00141417
ENSMUST00000048010	ENSMUSG00000039497	Dse	chr10:34151393-34207551	2.31799	1.32029	0.812017	5e-05	0.00141417
ENSMUST00000005255	ENSMUSG00000005124	Wisp1	chr15:66891319-66923201	0.942339	0.604285	0.641017	0.00095	0.0182319
ENSMUST00000023994	ENSMUSG00000023224	Serping1	chr2:84765386-84775444	18.361	10.9082	0.751228	5e-05	0.00141417
ENSMUST00000113532	ENSMUSG00000055632	Hmcn2	chr2:31314414-31460738	0.615866	0.448231	0.458372	0.00195	0.0327838
ENSMUST00000111265	ENSMUSG00000027217	Tspan18	chr2:93201759-93334487	2.52234	1.71197	0.559103	0.0003	0.00690244
ENSMUST00000000188	ENSMUSG00000000184	Ccnd2	chr6:127125161-127152193	4.20881	3.0139	0.481781	5e-05	0.00141417
ENSMUST00000029371	ENSMUSG00000027796	Smad9	chr3:54755581-54801257	0.822446	0.525421	0.646446	0.0009	0.0174274
ENSMUST00000114239	ENSMUSG00000022876	Samsn1	chr16:75858792-76022270	0.577648	0.197364	1.54933	0.0005	0.0106375
ENSMUST00000110221	ENSMUSG00000022371	Col14a1	chr15:55307749-55520803	11.3478	6.95852	0.705556	5e-05	0.00141417
ENSMUST00000025511	ENSMUSG00000024608	Rps14	chr18:60774509-60778546	547.562	428.399	0.354067	0.00135	0.0242813
ENSMUST00000003569	ENSMUSG00000003477	Inmt	chr6:55170625-55175043	571.679	435.966	0.39099	0.00055	0.0115424
ENSMUST00000008280	ENSMUSG00000008136	Fhl2	chr1:43123073-43196984	5.83463	3.58348	0.703278	5e-05	0.00141417
ENSMUST00000049930	ENSMUSG00000045680	Tcf21	chr10:22817278-22820128	10.8103	7.29541	0.567345	0.0002	0.00485099
ENSMUST00000023243	ENSMUSG00000022579	Gpihbp1	chr15:75596627-75599481	11.4663	6.40932	0.839157	5e-05	0.00141417
ENSMUST00000107044	ENSMUSG00000030701	Plekhb1	chr7:100642891-100662414	6.60927	4.47409	0.562895	0.0026	0.0414406
ENSMUST00000044850	ENSMUSG00000041797	Abca9	chr11:110100748-110168196	4.17793	3.0612	0.44869	0.00055	0.0115424
ENSMUST00000047762	ENSMUSG00000005836	Gata6	chr18:11049930-11085635	0.737767	0.32443	1.18526	5e-05	0.00141417
ENSMUST00000047761	ENSMUSG00000022132	Cldn10	chr14:118787907-118875489	90.7638	69.2351	0.390613	0.0012	0.0220581
ENSMUST00000114989	ENSMUSG00000038784	Cnot4	chr6:35022064-35133724	2.5463	1.01216	1.33097	0.0008	0.0157593
ENSMUST00000087033	ENSMUSG00000067149	Jchain	chr5:88520511-88527891	1.892	0.841227	1.16934	5e-05	0.00141417
ENSMUST00000001927	ENSMUSG00000001870	Ltbp1	chr17:75005567-75391767	2.9387	2.14032	0.457354	0.0024	0.0387964
ENSMUST00000087883	ENSMUSG00000026043	Col3a1	chr1:45311537-45349706	4.93429	3.05496	0.691687	5e-05	0.00141417
ENSMUST00000073471	ENSMUSG00000060938	Rpl26	chr11:68901582-68904534	916.208	722.75	0.342179	0.0022	0.0361992
ENSMUST00000020579	ENSMUSG00000020330	Hmmr	chr11:40701394-40733422	0.807615	0.326846	1.30506	5e-05	0.00141417
ENSMUST00000029574	ENSMUSG00000027962	Vcam1	chr3:116109948-116129688	3.30574	2.10531	0.650943	5e-05	0.00141417
ENSMUST00000048432	ENSMUSG00000041577	Prelp	chr1:133910303-133921414	5.72744	3.73931	0.615117	5e-05	0.00141417
ENSMUST00000089129	ENSMUSG00000068086	Cyp2d9	chr15:82452376-82456827	198.883	115.079	0.789289	5e-05	0.00141417
ENSMUST00000045035	ENSMUSG00000040564	Apoc1	chr7:19689483-19692658	16.4728	6.85923	1.26397	5e-05	0.00141417
ENSMUST00000066529	ENSMUSG00000022206	Npr3	chr15:11839895-11905674	6.19414	2.81998	1.13522	5e-05	0.00141417
ENSMUST00000001181	ENSMUSG00000020241	Col6a2	chr10:76595761-76623630	5.06643	2.49789	1.02026	5e-05	0.00141417
ENSMUST00000021853	ENSMUSG00000021416	Eci3	chr13:34924408-34963810	147.812	112.165	0.398145	0.0002	0.00485099
ENSMUST00000178221	ENSMUSG00000095388	Gm10681	chr3:98552541-98588807	10.2261	6.54991	0.642713	5e-05	0.00141417
ENSMUST00000067680	ENSMUSG00000054555	Adam12	chr7:133883198-134232146	0.972822	0.547892	0.828285	5e-05	0.00141417
ENSMUST00000000476	ENSMUSG00000029231	Pdgfra	chr5:75152291-75198215	7.45386	3.90665	0.932057	5e-05	0.00141417
ENSMUST00000095360	ENSMUSG00000020053	Igf1	chr10:87858264-87937042	1.11571	0.703634	0.665062	0.00015	0.00378624
ENSMUST00000073388	ENSMUSG00000017718	Afmid	chr11:117809667-117839908	45.4541	32.3982	0.488499	0.003	0.0461893
ENSMUST00000066859	ENSMUSG00000026365	Cfh	chr1:140084707-140183411	50.4284	27.5206	0.873726	5e-05	0.00141417
ENSMUST00000009039	ENSMUSG00000058600	Rpl30	chr15:34440504-34443640	275.599	201.734	0.450121	0.00275	0.0432258
ENSMUST00000032260	ENSMUSG00000030157	Clec2d	chr6:129180614-129186534	47.5238	33.9012	0.487314	5e-05	0.00141417
ENSMUST00000108268	ENSMUSG00000001123	Lgals9	chr11:78962973-78984946	6.71932	4.43856	0.598225	0.00015	0.00378624
ENSMUST00000111868	ENSMUSG00000030228	Pik3c2g	chr6:139715860-139969284	0.630739	0.255691	1.30264	5e-05	0.00141417
ENSMUST00000034713	ENSMUSG00000032193	Ldlr	chr9:21723575-21749916	5.46849	3.08463	0.826045	5e-05	0.00141417
ENSMUST00000059562	ENSMUSG00000048332	Lhfp	chr3:53041527-53261679	7.65692	5.33274	0.521887	0.0002	0.00485099
ENSMUST00000020399	ENSMUSG00000020183	Cpm	chr10:117629499-117687352	11.4801	7.10949	0.691322	5e-05	0.00141417
ENSMUST00000020271	ENSMUSG00000020077	Srgn	chr10:62493832-62527451	26.0059	19.2984	0.430357	0.00165	0.0286638
ENSMUST00000107178	ENSMUSG00000066113	Adamtsl1	chr4:86053914-86428385	0.475779	0.271895	0.807243	0.00045	0.009687
ENSMUST00000034903	ENSMUSG00000032348	Gsta4	chr9:78191965-78209348	58.0583	38.5215	0.591839	5e-05	0.00141417
ENSMUST00000034902	ENSMUSG00000057933	Gsta2	chr9:78331017-78355788	223.395	126.142	0.824547	5e-05	0.00141417
ENSMUST00000059155	ENSMUSG00000045294	Insig1	chr5:28071362-28078662	25.9711	16.579	0.647548	5e-05	0.00141417
ENSMUST00000114034	ENSMUSG00000047766	Lrrc49	chr9:60569171-60688158	0.750993	0.297098	1.33786	0.0007	0.0141397
ENSMUST00000112866	ENSMUSG00000061353	Cxcl12	chr6:117168534-117181367	42.8338	26.1402	0.71248	5e-05	0.00141417
ENSMUST00000041331	ENSMUSG00000037071	Scd1	chr19:44394450-44407709	13.8987	8.06649	0.78494	5e-05	0.00141417
ENSMUST00000127748	ENSMUSG00000043496	Tril	chr6:53815467-53820830	1.91901	1.32473	0.534666	0.00065	0.0133036
ENSMUST00000025833	ENSMUSG00000024899	Papss2	chr19:32620004-32667187	168.414	132.024	0.351213	0.00245	0.0394568
ENSMUST00000002336	ENSMUSG00000002266	Zim1	chr7:6671455-6696450	0.766321	0.421833	0.861279	5e-05	0.00141417
ENSMUST00000036070	ENSMUSG00000021750	Fam107a	chr14:8296273-8318023	16.1594	11.0507	0.548238	0.0006	0.0124324
ENSMUST00000058593	ENSMUSG00000042961	Egflam	chr15:7206119-7398351	2.16258	0.990482	1.12655	0.00285	0.0444141
ENSMUST00000024829	ENSMUSG00000024030	Abcg1	chr17:31057697-31115777	2.75747	1.4431	0.934177	5e-05	0.00141417
ENSMUST00000110689	ENSMUSG00000079105	C7	chr15:4988761-5063773	4.16871	2.18394	0.93267	5e-05	0.00141417
ENSMUST00000204146	ENSMUSG00000063415	Cyp26b1	chr6:84571413-84593908	2.87675	1.35848	1.08245	0.00065	0.0133036
ENSMUST00000047753	ENSMUSG00000040584	Abcb1a	chr5:8660076-8748575	4.65327	3.47273	0.422172	0.00095	0.0182319
ENSMUST00000038144	ENSMUSG00000042379	Esm1	chr13:113171607-113225908	12.9154	7.13151	0.856808	5e-05	0.00141417
ENSMUST00000026221	ENSMUSG00000025203	Scd2	chr19:44293675-44306864	25.361	18.631	0.444906	5e-05	0.00141417
ENSMUST00000046383	ENSMUSG00000039304	Tnfsf10	chr3:27317027-27342427	13.0357	10.2971	0.340233	0.00215	0.0355551
ENSMUST00000044602	ENSMUSG00000057074	Ces1g	chr8:93302368-93337308	4.53103	1.42727	1.66658	5e-05	0.00141417
ENSMUST00000021166	ENSMUSG00000020810	Cygb	chr11:116645594-116668389	3.09505	2.00723	0.62476	0.00035	0.00785859
ENSMUST00000119475	ENSMUSG00000054690	Emcn	chr3:137341066-137432185	26.6493	16.2053	0.717638	5e-05	0.00141417
ENSMUST00000023151	ENSMUSG00000022508	Bcl6	chr16:23965051-23988852	16.7373	6.80007	1.29944	5e-05	0.00141417
ENSMUST00000023154	ENSMUSG00000022512	Cldn1	chr16:26356641-26371841	12.8214	9.46164	0.438391	0.00035	0.00785859
ENSMUST00000068031	ENSMUSG00000020914	Top2a	chr11:98992942-99024189	1.3941	0.853277	0.708246	0.00015	0.00378624
ENSMUST00000002274	ENSMUSG00000002204	Napsa	chr7:44572431-44586862	487.82	383.243	0.348088	0.0025	0.0401043
ENSMUST00000046223	ENSMUSG00000041828	Abca8a	chr11:110025633-110095978	8.10924	5.52988	0.552317	5e-05	0.00141417
ENSMUST00000071076	ENSMUSG00000056755	Grm7	chr6:110645580-111567230	0.593515	0.200738	1.56397	0.00195	0.0327838
ENSMUST00000021822	ENSMUSG00000021390	Ogn	chr13:49464026-49652746	10.0358	6.0705	0.725263	5e-05	0.00141417
ENSMUST00000091703	ENSMUSG00000069267	Hist1h3b	chr13:23752266-23752886	7.19559	3.74181	0.943376	5e-05	0.00141417
ENSMUST00000091709	ENSMUSG00000095217	Hist1h2bn	chr13:21754122-21754503	6.20372	2.66834	1.21719	0.00225	0.0368149
ENSMUST00000092940	ENSMUSG00000020798	Spns3	chr11:72498154-72550506	1.94727	0.996554	0.96643	0.0012	0.0220581
ENSMUST00000015484	ENSMUSG00000015340	Cybb	chrX:9435251-9487771	2.29479	1.6079	0.513183	0.00075	0.0149651
ENSMUST00000057610	ENSMUSG00000040260	Daam2	chr17:49456021-49564337	4.35589	2.99302	0.541368	5e-05	0.00141417
ENSMUST00000000299	ENSMUSG00000000290	Itgb2	chr10:77530251-77565686	1.32321	0.683885	0.95222	5e-05	0.00141417
ENSMUST00000121175	ENSMUSG00000040488	Ltbp4	chr7:27305135-27337692	5.39852	3.77197	0.517244	5e-05	0.00141417
ENSMUST00000171737	ENSMUSG00000011179	Odc1	chr12:17544872-17551502	129.541	96.959	0.417962	0.00015	0.00378624
ENSMUST00000028045	ENSMUSG00000026712	Mrc1	chr2:14229391-14332057	1.30083	0.889195	0.548863	0.00105	0.019753
ENSMUST00000085056	ENSMUSG00000066366	Serpina1a	chr12:103853588-103863562	38.6606	26.1009	0.566765	5e-05	0.00141417
ENSMUST00000031795	ENSMUSG00000029781	Fkbp9	chr6:56832058-56879358	35.2353	27.618	0.351413	0.00145	0.0257185
ENSMUST00000170122	ENSMUSG00000090733	Rps27	chr3:90212521-90213651	2421.81	1813.85	0.417031	0.0002	0.00485099
ENSMUST00000110523	ENSMUSG00000058914	C1qtnf3	chr15:10952331-10980150	13.2875	6.4328	1.04655	0.00015	0.00378624
ENSMUST00000109432	ENSMUSG00000006369	Fbln1	chr15:85205948-85286535	1.15005	0.617162	0.897978	0.00195	0.0327838
ENSMUST00000002677	ENSMUSG00000002602	Axl	chr7:25757272-25788705	7.72604	5.17512	0.578139	5e-05	0.00141417
ENSMUST00000021016	ENSMUSG00000020679	Hnf1b	chr11:83850062-83905819	36.2118	25.267	0.519205	0.00035	0.00785859
ENSMUST00000102881	ENSMUSG00000020120	Plek	chr11:16971205-17079371	0.971865	0.284572	1.77196	5e-05	0.00141417
ENSMUST00000056925	ENSMUSG00000048126	Col6a3	chr1:90765922-90843971	2.00472	1.12674	0.83124	5e-05	0.00141417
ENSMUST00000030336	ENSMUSG00000028599	Tnfrsf1b	chr4:145213462-145246870	1.81786	1.23366	0.559295	0.001	0.0189868
ENSMUST00000050047	ENSMUSG00000044816	D630023F18Rik	chr1:65100388-65123214	15.1829	8.98269	0.757226	5e-05	0.00141417
ENSMUST00000078509	ENSMUSG00000024039	Cbs	chr17:31612622-31637199	43.4232	27.8261	0.642028	0.00055	0.0115424
ENSMUST00000020970	ENSMUSG00000020641	Rsad2	chr12:26442752-26456452	11.6965	7.51609	0.638028	5e-05	0.00141417
ENSMUST00000044503	ENSMUSG00000039316	Rftn1	chr17:49992256-50190674	1.12889	0.584594	0.949399	0.0014	0.0250158
ENSMUST00000070478	ENSMUSG00000025743	Sdc3	chr4:130792536-130826319	4.63264	3.40602	0.443747	0.00035	0.00785859
ENSMUST00000035890	ENSMUSG00000041052	Slc7a13	chr4:19818724-19842218	123.59	59.1523	1.06306	5e-05	0.00141417
ENSMUST00000205004	ENSMUSG00000005364	Il5ra	chr6:106710356-106749037	2.20833	1.24625	0.825368	0.0014	0.0250158
ENSMUST00000049285	ENSMUSG00000034648	Lrrn1	chr6:107529767-107570214	3.32277	1.69265	0.973101	5e-05	0.00141417
ENSMUST00000121021	ENSMUSG00000018604	Tbx3	chr5:119617900-119684724	0.856646	0.329243	1.37955	0.00225	0.0368149
ENSMUST00000081840	ENSMUSG00000057841	Rpl32	chr6:115774537-115808747	638.671	485.836	0.394604	0.00035	0.00785859
ENSMUST00000065651	ENSMUSG00000063590	Slc22a28	chr19:8062208-8131982	32.497	23.258	0.482581	5e-05	0.00141417
ENSMUST00000031055	ENSMUSG00000029163	Emilin1	chr5:30913401-30921277	10.0581	6.32065	0.670212	5e-05	0.00141417
ENSMUST00000185968	ENSMUSG00000030228	Pik3c2g	chr6:139587220-139657231	1.2215	0.633281	0.947739	0.00185	0.031399
ENSMUST00000038368	ENSMUSG00000042745	Id1	chr2:152736250-152737410	52.1699	35.674	0.548347	5e-05	0.00141417
ENSMUST00000016168	ENSMUSG00000016024	Lbp	chr2:158306492-158332852	1.49821	0.930762	0.686757	0.00135	0.0242813
ENSMUST00000030947	ENSMUSG00000029070	Mxra8	chr4:155839679-155844088	6.29863	4.49077	0.488074	0.0012	0.0220581
ENSMUST00000024894	ENSMUSG00000024087	Cyp1b1	chr17:79706952-79715041	10.4379	5.99549	0.799879	5e-05	0.00141417
ENSMUST00000035105	ENSMUSG00000032518	Rpsa	chr9:120127765-120132369	96.4607	76.8314	0.328245	0.0028	0.0438435
ENSMUST00000015368	ENSMUSG00000066097	Cyp2j11	chr4:96294507-96348662	118.177	90.6028	0.383327	0.0004	0.00878381
ENSMUST00000050160	ENSMUSG00000051669	AU021092	chr16:5211827-5222299	8.16868	5.41711	0.592579	0.00015	0.00378624
ENSMUST00000075190	ENSMUSG00000031673	Cdh11	chr8:102632994-102785111	3.75006	2.09806	0.837862	5e-05	0.00141417
ENSMUST00000028864	ENSMUSG00000027386	Fbln7	chr2:128862980-128897034	1.72538	1.13735	0.601232	0.00135	0.0242813
ENSMUST00000165205	ENSMUSG00000090958	Lrrc32	chr7:98489282-98502181	4.60134	2.75277	0.741169	5e-05	0.00141417
ENSMUST00000044426	ENSMUSG00000032978	Guca2b	chr4:119656606-119658954	627.911	460.92	0.446045	5e-05	0.00141417
ENSMUST00000101375	ENSMUSG00000057113	Npm1	chr11:33152286-33163206	65.1778	32.9797	0.982801	0.002	0.0334664
ENSMUST00000033606	ENSMUSG00000031253	Srpx2	chrX:133908425-133932446	1.016	0.498637	1.02684	0.00215	0.0355551
ENSMUST00000105322	ENSMUSG00000078439	Smim24	chr10:81393050-81395392	191.146	145.978	0.388928	0.00035	0.00785859
ENSMUST00000023884	ENSMUSG00000023120	Gm853	chr4:130209108-130222401	2.05348	1.03561	0.987587	5e-05	0.00141417
ENSMUST00000022282	ENSMUSG00000021760	Gpx8	chr13:113035110-113091195	9.37552	5.90293	0.667468	5e-05	0.00141417
ENSMUST00000054220	ENSMUSG00000045128	Rpl18a	chr8:70894721-70897443	272.011	203.356	0.41966	0.0002	0.00485099
ENSMUST00000091752	ENSMUSG00000069310	Hist1h3c	chr13:23745012-23745501	10.2921	5.68382	0.856612	0.0004	0.00878381
ENSMUST00000019382	ENSMUSG00000031708	Tecr	chr8:83571699-83594491	123.133	94.1159	0.387706	0.00085	0.0165966
ENSMUST00000073868	ENSMUSG00000061315	Naca	chr10:128035345-128048637	288.756	217.142	0.411216	0.00015	0.00378624
ENSMUST00000006912	ENSMUSG00000026737	Pip4k2a	chr2:18842254-18998126	3.491	2.53873	0.459538	0.0016	0.0279374
ENSMUST00000034742	ENSMUSG00000032218	Ccnb2	chr9:70407688-70421554	0.995445	0.504701	0.979914	0.00285	0.0444141
ENSMUST00000023600	ENSMUSG00000022883	Robo1	chr16:72663148-73046095	0.885821	0.58762	0.592132	0.00075	0.0149651
ENSMUST00000021603	ENSMUSG00000021186	Fbln5	chr12:101746564-101819055	22.3235	11.8942	0.908311	5e-05	0.00141417
ENSMUST00000058437	ENSMUSG00000043716	Rpl7	chr1:16101294-16104662	441.388	333.099	0.406094	0.0001	0.00265335
ENSMUST00000031398	ENSMUSG00000029445	Hpd	chr5:123171806-123182727	256.255	173.305	0.564268	5e-05	0.00141417
ENSMUST00000107409	ENSMUSG00000030605	Mfge8	chr7:79133767-79149060	28.5702	22.2356	0.361641	0.00275	0.0432258
ENSMUST00000077190	ENSMUSG00000032564	Cpne4	chr9:104547285-105034544	2.76598	1.71278	0.691448	0.00105	0.019753
ENSMUST00000022368	ENSMUSG00000021822	Plau	chr14:20836661-20843388	72.5391	57.3419	0.339168	0.00185	0.031399
ENSMUST00000026911	ENSMUSG00000025804	Ccr1	chr9:123962125-123968692	0.473349	0.211319	1.16348	0.0007	0.0141397
ENSMUST00000040069	ENSMUSG00000036103	Colec12	chr18:9707647-9877995	6.73823	4.76679	0.499351	0.00015	0.00378624
ENSMUST00000040065	ENSMUSG00000033777	Tlr13	chrX:106143228-106160493	0.751535	0.467498	0.684881	0.003	0.0461893
ENSMUST00000041005	ENSMUSG00000059412	Fxyd2	chr9:45403137-45410278	2333.28	1815.16	0.362266	0.0026	0.0414406
ENSMUST00000000696	ENSMUSG00000000682	Cd52	chr4:134093535-134095082	8.42524	4.68944	0.845303	0.00065	0.0133036
ENSMUST00000033683	ENSMUSG00000031320	Rps4x	chrX:102184940-102189394	408.3	322.166	0.341825	0.00215	0.0355551
ENSMUST00000029722	ENSMUSG00000028081	Rps3a1	chr3:86137939-86142702	444.686	342.817	0.375346	0.0007	0.0141397
ENSMUST00000026328	ENSMUSG00000025289	Prdx4	chrX:155323917-155340754	31.2445	21.7724	0.521103	0.0001	0.00265335
ENSMUST00000103146	ENSMUSG00000071415	Rpl23	chr11:97777526-97782437	325.632	251.455	0.37294	0.0008	0.0157593
ENSMUST00000019071	ENSMUSG00000018927	Ccl6	chr11:83582055-83623693	3.62792	2.14191	0.760241	0.0016	0.0279374
ENSMUST00000116527	ENSMUSG00000047844	Bex4	chrX:136138995-136140443	14.2944	10.2553	0.479081	0.00185	0.031399
ENSMUST00000078804	ENSMUSG00000060636	Rpl35a	chr16:33056452-33060189	346.694	259.619	0.417268	0.00035	0.00785859
ENSMUST00000031314	ENSMUSG00000029368	Alb	chr5:90460896-90476602	15.2835	9.43344	0.69612	5e-05	0.00141417
ENSMUST00000117507	ENSMUSG00000028108	Ecm1	chr3:95734146-95739569	40.6695	15.5256	1.3893	5e-05	0.00141417
ENSMUST00000042042	ENSMUSG00000035699	Slc51a	chr16:32475521-32487879	40.119	27.34	0.553272	5e-05	0.00141417
ENSMUST00000022853	ENSMUSG00000058914	C1qtnf3	chr15:10952331-10980150	35.6375	19.9513	0.836915	5e-05	0.00141417
ENSMUST00000053078	ENSMUSG00000050930	Map10	chr8:125669817-125673359	2.99754	2.15731	0.47455	0.0016	0.0279374
ENSMUST00000019992	ENSMUSG00000019846	Lama4	chr10:38965514-39110188	1.21735	0.852141	0.51458	0.0019	0.0321013
ENSMUST00000002846	ENSMUSG00000002769	Gnmt	chr17:46725663-46729168	32.3379	23.7526	0.445143	0.00025	0.00588258
ENSMUST00000011178	ENSMUSG00000011034	Slc5a1	chr5:33104218-33162870	26.2738	20.8352	0.334602	0.00275	0.0432258
ENSMUST00000016231	ENSMUSG00000016087	Fli1	chr9:32422203-32542861	5.33035	3.64136	0.549753	0.0002	0.00485099
ENSMUST00000045356	ENSMUSG00000041841	Rpl37	chr15:5116612-5119140	153.2	116.812	0.391228	0.00025	0.00588258
ENSMUST00000167753	ENSMUSG00000090817	Gm4450	chr3:98445674-98457126	62.004	41.1485	0.591522	5e-05	0.00141417
ENSMUST00000090726	ENSMUSG00000027074	Slc43a3	chr2:84936578-84958509	13.394	10.1764	0.396353	0.0016	0.0279374
ENSMUST00000025522	ENSMUSG00000024620	Pdgfrb	chr18:61045149-61085061	7.39805	4.5831	0.690822	5e-05	0.00141417
ENSMUST00000036952	ENSMUSG00000036275	9530068E07Rik	chr11:52396427-52408728	58.6289	35.5713	0.720898	0.00265	0.0420006
ENSMUST00000026211	ENSMUSG00000025197	Cyp2c44	chr19:44005021-44029247	71.7679	38.2003	0.909755	5e-05	0.00141417
ENSMUST00000120411	ENSMUSG00000021750	Fam107a	chr14:8296273-8318023	14.422	8.55116	0.754081	0.00035	0.00785859
ENSMUST00000001547	ENSMUSG00000001506	Col1a1	chr11:94936223-94953042	2.37329	1.49502	0.666726	5e-05	0.00141417
ENSMUST00000055770	ENSMUSG00000049539	Hist1h1a	chr13:23763716-23764358	5.98453	3.25009	0.880758	0.00055	0.0115424
ENSMUST00000061260	ENSMUSG00000046743	Fat4	chr3:38886939-39011985	1.45224	0.994114	0.546796	5e-05	0.00141417
ENSMUST00000045730	ENSMUSG00000038587	Akap12	chr10:4266328-4359468	4.11022	2.96405	0.471645	0.00025	0.00588258
ENSMUST00000174355	ENSMUSG00000002985	Apoe	chr7:19696108-19699166	172.207	103.811	0.730179	5e-05	0.00141417
ENSMUST00000042850	ENSMUSG00000028369	Svep1	chr4:58042441-58206635	4.76852	3.09947	0.621519	5e-05	0.00141417
ENSMUST00000038407	ENSMUSG00000034839	Larp6	chr9:60712988-60738801	0.634978	0.310121	1.03388	0.00095	0.0182319
ENSMUST00000034187	ENSMUSG00000031740	Mmp2	chr8:92827327-92853417	1.24036	0.717764	0.789182	0.00025	0.00588258
ENSMUST00000015540	ENSMUSG00000015396	Cd83	chr13:43785106-43803130	0.92926	0.524997	0.823772	0.0029	0.0449794
ENSMUST00000034432	ENSMUSG00000031954	Cfdp1	chr8:111768472-111854310	49.7288	38.5936	0.36572	0.0017	0.0293704
ENSMUST00000022921	ENSMUSG00000022309	Angpt1	chr15:42424726-42676977	6.57896	4.62679	0.507849	0.00015	0.00378624
ENSMUST00000028633	ENSMUSG00000027204	Fbn1	chr2:125300593-125507993	3.56058	2.07434	0.779458	5e-05	0.00141417
ENSMUST00000111773	ENSMUSG00000039607	Rbms3	chr9:116572745-117629913	2.08017	1.35927	0.613869	0.00095	0.0182319
ENSMUST00000069360	ENSMUSG00000055653	Gpc3	chrX:52272425-52613950	14.7463	9.27766	0.668515	5e-05	0.00141417
ENSMUST00000076052	ENSMUSG00000061119	Prcp	chr7:92875252-92934573	37.892	29.9474	0.339463	0.0019	0.0321013
ENSMUST00000171332	ENSMUSG00000028763	Hspg2	chr4:137468768-137570630	4.93433	2.9864	0.724448	0.0007	0.0141397
ENSMUST00000112525	ENSMUSG00000054580	Pla2r1	chr2:60417542-60553308	2.08522	1.47294	0.501498	0.00045	0.009687
