# Supplementary material for: Altered Expression of Long Noncoding and Messenger RNAs in Diabetic Nephropathy following Treatment with Rosiglitazone
Source: Biomed Res Int. 2020 Jan 12;2020:1360843. doi: 10.1155/2020/1360843 (PMC6983290; doi:10.1155/2020/1360843)
Supplement: Supplementary Materials — Supplementary Table 1: significantly upregulated mRNAs in dbdb mice compared to the control group. Supplementary Table 2: significantly downregulated mRNAs in dbdb mice compared to the control group. Supplementary Table 3: significantly upregulated mRNAs in dbR mice compared to the dbdb group. Supplementary Table 4: significantly downregulated mRNAs in dbR mice compared to the dbdb group. Supplementary Table 5: mRNAs significantly upregulated by diabetic nephropathy yet reversed following rosiglitazone treatment. Supplementary Table 6: mRNAs significantly downregulated by diabetic nephropathy yet reversed following rosiglitazone treatment. Supplementary Table 7: significantly upregulated lncRNAs in dbdb mice compared to the control group. Supplementary Table 8: significantly downregulated lncRNAs in dbdb mice compared to the control group. Supplementary Table 9: significantly upregulated lncRNAs in dbR mice compared to the dbdb group. Supplementary Table 10: significantly downregulated lncRNAs in dbR mice compared to the dbdb group. Supplementary Table 11: lncRNAs significantly upregulated by diabetic nephropathy yet reversed following rosiglitazone treatment. Supplementary Table 12: lncRNAs significantly downregulated by diabetic nephropathy yet reversed following rosiglitazone treatment. Supplementary Table 13: differentially expressed lncRNAs colocated with genes. Supplementary Table 14: differentially expressed lncRNAs coexpressed with genes. Supplementary Table 15: top 20 significantly enriched GO terms associated with differentially expressed mRNAs in the kidneys of dbdb mice compared to the controls. Supplementary Table 16: top 20 significantly enriched GO terms associated with differentially expressed mRNAs in the kidneys of dbR mice compared to the dbdb group. Supplementary Table 17: top 20 significantly enriched GO terms associated with differentially expressed lncRNAs coexpressed with genes in the kidneys of dbdb mice compared to the controls. Supplementa [file 1360843.f1.zip › 1360843.f1/Supplementary Table 4.xls]

## Sheet: Table S4 mRNA_dbR_vs_dbdb.DE_DO
Supplementary Table 4 Significantly down-regulated mRNAs in dbR mice compared to the dbdb group
transcript_id	gene_id	gene_name	gene_location	dbR_FPKM	dbdb_FPKM	log2(foldchange)	pvalue	qvalue
ENSMUST00000031327	ENSMUSG00000029380	Cxcl1	chr5:90891240-90893115	1.12494	2.1889	-0.960366	0.00195	0.0327838
ENSMUST00000051672	ENSMUSG00000046718	Bst2	chr8:71534263-71537437	9.74751	15.9751	-0.712719	5e-05	0.00141417
ENSMUST00000144826	ENSMUSG00000023087	Noct	chr3:51224446-51251644	14.4483	20.3387	-0.493323	0.00075	0.0149651
ENSMUST00000003635	ENSMUSG00000003541	Ier3	chr17:35821683-35822923	24.6981	41.1712	-0.737238	5e-05	0.00141417
ENSMUST00000139848	ENSMUSG00000034472	Rasd2	chr8:75213943-75224113	1.39965	2.06586	-0.561675	0.0013	0.0235944
ENSMUST00000104915	ENSMUSG00000078117	Gm16485	chr9:8971790-8975773	0.259947	0.501463	-0.947925	0.0006	0.0124324
ENSMUST00000028880	ENSMUSG00000027397	Slc20a1	chr2:129198763-129226438	7.30112	10.2495	-0.48936	0.0001	0.00265335
ENSMUST00000027422	ENSMUSG00000026220	Slc16a14	chr1:84905897-84935134	33.3334	60.5904	-0.862119	5e-05	0.00141417
ENSMUST00000041874	ENSMUSG00000042684	Npl	chr1:153503014-153550045	42.2779	63.6329	-0.58987	5e-05	0.00141417
ENSMUST00000001672	ENSMUSG00000001627	Ifrd1	chr12:40201566-40248504	2.43053	3.68049	-0.598626	0.0003	0.00690244
ENSMUST00000023752	ENSMUSG00000023013	Aqp2	chr15:99579055-99584545	63.983	88.5533	-0.468859	5e-05	0.00141417
ENSMUST00000055294	ENSMUSG00000050069	Grem2	chr1:174833784-174921819	0.478051	1.80353	-1.91559	5e-05	0.00141417
ENSMUST00000029865	ENSMUSG00000028211	Trp53inp1	chr4:11156430-11174379	13.9458	17.9182	-0.3616	0.00105	0.019753
ENSMUST00000102824	ENSMUSG00000034459	Ifit1	chr19:34640870-34650009	2.20471	3.42287	-0.634619	5e-05	0.00141417
ENSMUST00000066912	ENSMUSG00000054072	Iigp1	chr18:60376028-60392627	4.43146	18.1292	-2.03246	5e-05	0.00141417
ENSMUST00000141118	ENSMUSG00000032786	Alas1	chr9:106233454-106248126	29.4926	44.5132	-0.593879	0.001	0.0189868
ENSMUST00000093470	ENSMUSG00000051147	Nat2	chr8:67494866-67502580	15.8546	21.9154	-0.467044	0.00035	0.00785859
ENSMUST00000035121	ENSMUSG00000032531	Amotl2	chr9:102716671-102733418	19.5036	26.2066	-0.42619	0.00025	0.00588258
ENSMUST00000102678	ENSMUSG00000067212	H2-T23	chr17:36029975-36032855	24.2201	43.3626	-0.840247	5e-05	0.00141417
ENSMUST00000018572	ENSMUSG00000018428	Akap1	chr11:88830791-88881395	14.1356	18.483	-0.386863	0.00285	0.0444141
ENSMUST00000127638	ENSMUSG00000004040	Stat3	chr11:100859350-100939540	13.3218	19.2544	-0.531395	5e-05	0.00141417
ENSMUST00000074557	ENSMUSG00000060586	H2-Eb1	chr17:34305876-34316199	20.508	57.1307	-1.47808	5e-05	0.00141417
ENSMUST00000037811	ENSMUSG00000020609	Apob	chr12:7977647-8016835	89.164	143.78	-0.689327	5e-05	0.00141417
ENSMUST00000020145	ENSMUSG00000019970	Sgk1	chr10:21882183-21999903	121.426	202.328	-0.736622	5e-05	0.00141417
ENSMUST00000052126	ENSMUSG00000043681	Fam25c	chr14:34351880-34355433	11.6023	20.9031	-0.849308	0.0002	0.00485099
ENSMUST00000082426	ENSMUSG00000034785	Dio1	chr4:107291464-107307169	4.68974	6.50151	-0.471267	0.0022	0.0361992
ENSMUST00000024011	ENSMUSG00000023243	Kcnk5	chr14:20140057-20181782	44.8719	65.2357	-0.53985	5e-05	0.00141417
ENSMUST00000037678	ENSMUSG00000034371	Tkfc	chr19:10592199-10604258	108.854	144.763	-0.411295	0.0001	0.00265335
ENSMUST00000110103	ENSMUSG00000038508	Gdf15	chr8:70629392-70632456	1.13108	2.61194	-1.20742	0.00075	0.0149651
ENSMUST00000044038	ENSMUSG00000039648	Ccbl1	chr2:30185123-30205847	16.9374	23.9352	-0.498926	0.0004	0.00878381
ENSMUST00000032748	ENSMUSG00000030533	Unc45a	chr7:80325291-80341005	5.23649	7.7438	-0.564441	5e-05	0.00141417
ENSMUST00000061457	ENSMUSG00000044636	Csrnp2	chr15:100479569-100495239	1.72108	2.45574	-0.512839	0.00065	0.0133036
ENSMUST00000033173	ENSMUSG00000030880	Polr3e	chr7:120917743-120947432	21.3529	27.7864	-0.37995	0.0006	0.0124324
ENSMUST00000034510	ENSMUSG00000032012	Pvrl1	chr9:43738868-43807454	16.6067	20.9041	-0.332023	0.00275	0.0432258
ENSMUST00000042125	ENSMUSG00000033257	Ttll4	chr1:74661744-74703730	6.14036	7.9473	-0.372141	0.00285	0.0444141
ENSMUST00000099309	ENSMUSG00000074768	Bhmt	chr13:93616890-93637961	27.1548	34.9914	-0.365791	0.0012	0.0220581
ENSMUST00000022587	ENSMUSG00000022010	Tsc22d1	chr14:76414960-76507765	148.958	249.467	-0.743948	5e-05	0.00141417
ENSMUST00000085635	ENSMUSG00000066595	Mfsd7b	chr1:191005846-191029781	4.1247	6.09424	-0.56316	5e-05	0.00141417
ENSMUST00000004470	ENSMUSG00000004356	Utp20	chr10:88746606-88826814	16.1994	20.7677	-0.358403	0.00145	0.0257185
ENSMUST00000130310	ENSMUSG00000025586	Cpeb1	chr7:81347025-81454758	2.65801	4.14363	-0.640551	0.00185	0.031399
ENSMUST00000042065	ENSMUSG00000033618	Map3k13	chr16:21891968-21931877	4.98471	6.73508	-0.434185	0.0005	0.0106375
ENSMUST00000064129	ENSMUSG00000028555	Ttc39a	chr4:109406622-109444745	0.307606	0.762037	-1.30878	0.0001	0.00265335
ENSMUST00000028838	ENSMUSG00000027360	Hdc	chr2:126593666-126618678	1.06171	1.6646	-0.648783	0.00175	0.0300127
ENSMUST00000022212	ENSMUSG00000021701	Plk2	chr13:110395043-110400844	2.24678	3.11451	-0.471146	0.0033	0.0499537
ENSMUST00000050487	ENSMUSG00000024610	Cd74	chr18:60803847-60812646	87.521	290.683	-1.73174	5e-05	0.00141417
ENSMUST00000113307	ENSMUSG00000026819	Slc25a25	chr2:32414486-32456953	20.0684	40.6711	-1.01908	5e-05	0.00141417
ENSMUST00000047922	ENSMUSG00000034919	Ttc22	chr4:106622431-106640189	1.36564	2.08558	-0.610873	0.0021	0.034862
ENSMUST00000082125	ENSMUSG00000009772	Nuak2	chr1:132316125-132333488	32.3952	70.4843	-1.12152	5e-05	0.00141417
ENSMUST00000031490	ENSMUSG00000029512	Ulk1	chr5:110784487-110810097	11.9453	15.5147	-0.377193	0.0011	0.020454
ENSMUST00000064370	ENSMUSG00000052496	Pkdrej	chr15:85806971-85821733	1.2813	2.39889	-0.904761	0.0001	0.00265335
ENSMUST00000060010	ENSMUSG00000044367	Slc16a13	chr11:70216788-70221064	9.48133	15.7599	-0.7331	5e-05	0.00141417
ENSMUST00000080817	ENSMUSG00000058761	Rnf169	chr7:99920256-99980458	10.174	13.0538	-0.359588	0.00105	0.019753
ENSMUST00000024042	ENSMUSG00000023272	Creld2	chr15:88819645-88826681	9.84773	13.5297	-0.458264	0.001	0.0189868
ENSMUST00000109418	ENSMUSG00000048486	Fitm2	chr2:163466378-163473005	8.76552	11.6355	-0.408623	0.0003	0.00690244
ENSMUST00000074989	ENSMUSG00000063382	Bcl9l	chr9:44499135-44510388	8.20943	10.4664	-0.350404	0.0021	0.034862
ENSMUST00000042561	ENSMUSG00000038178	Slc43a2	chr11:75531693-75577575	27.1377	35.6546	-0.39379	0.00325	0.0493611
ENSMUST00000074082	ENSMUSG00000032786	Alas1	chr9:106233454-106248126	55.5412	82.3799	-0.568734	5e-05	0.00141417
ENSMUST00000001304	ENSMUSG00000001270	Ckb	chr12:111669354-111672338	17.2056	22.7551	-0.403311	0.0013	0.0235944
ENSMUST00000023672	ENSMUSG00000022951	Rcan1	chr16:92391952-92466146	23.434	70.5287	-1.58961	5e-05	0.00141417
ENSMUST00000196520	ENSMUSG00000104713	Gbp6	chr5:105214906-105293696	4.49633	20.785	-2.20872	5e-05	0.00141417
ENSMUST00000049994	ENSMUSG00000048899	Rimkla	chr4:119465282-119492628	0.264675	0.471335	-0.832528	0.0018	0.0306903
ENSMUST00000195354	ENSMUSG00000016200	Syt14	chr1:192891232-193035775	4.93462	6.46432	-0.38956	0.00105	0.019753
ENSMUST00000049519	ENSMUSG00000046879	Irgm1	chr11:48865244-48871420	21.1618	31.2719	-0.563405	0.0005	0.0106375
ENSMUST00000099623	ENSMUSG00000074968	Ano3	chr2:110655200-110950923	3.1121	5.82027	-0.903195	5e-05	0.00141417
ENSMUST00000169449	ENSMUSG00000027894	Slc6a17	chr3:107467542-107518018	1.3655	1.97676	-0.533714	0.0006	0.0124324
ENSMUST00000165774	ENSMUSG00000028270	Gbp2	chr3:142620601-142638008	3.63594	8.79634	-1.27458	5e-05	0.00141417
ENSMUST00000182625	ENSMUSG00000051817	Sox12	chr2:152393610-152398063	2.733	3.89084	-0.509597	0.0001	0.00265335
ENSMUST00000028167	ENSMUSG00000026827	Gpd2	chr2:57236226-57370719	8.07638	11.661	-0.529909	5e-05	0.00141417
ENSMUST00000019721	ENSMUSG00000019577	Pdk4	chr6:5483350-5496309	2.09274	4.27879	-1.03181	5e-05	0.00141417
ENSMUST00000041589	ENSMUSG00000037573	Tob1	chr11:94211453-94215495	41.078	61.1799	-0.574692	5e-05	0.00141417
ENSMUST00000109221	ENSMUSG00000017929	B4galt5	chr2:167298443-167349183	10.7672	13.8033	-0.358365	0.00155	0.0272269
ENSMUST00000063694	ENSMUSG00000052040	Klf13	chr7:63886350-63938915	16.2388	20.6162	-0.344333	0.0021	0.034862
ENSMUST00000034227	ENSMUSG00000031775	Pllp	chr8:94674894-94696242	14.3763	19.5886	-0.446329	0.0002	0.00485099
ENSMUST00000097563	ENSMUSG00000024610	Cd74	chr18:60803847-60812646	16.2283	44.4271	-1.45292	0.00075	0.0149651
ENSMUST00000044524	ENSMUSG00000039168	Dap	chr15:31224313-31274341	15.4022	19.7411	-0.358063	0.00285	0.0444141
ENSMUST00000164097	ENSMUSG00000006538	Ihh	chr1:74945314-74951672	3.5121	4.94648	-0.494068	0.0008	0.0157593
ENSMUST00000024839	ENSMUSG00000024042	Sik1	chr17:31844247-31855792	22.0227	29.0866	-0.401363	0.0003	0.00690244
ENSMUST00000101534	ENSMUSG00000029838	Ptn	chr6:36714928-36810220	0.804198	1.67524	-1.05874	0.00105	0.019753
ENSMUST00000068023	ENSMUSG00000054793	Cadm4	chr7:24482022-24504539	12.7809	16.4042	-0.360074	0.00285	0.0444141
ENSMUST00000015049	ENSMUSG00000014905	Dnajb9	chr12:44205896-44210068	23.2524	30.7976	-0.40544	0.0003	0.00690244
ENSMUST00000102755	ENSMUSG00000026839	Upp2	chr2:58567386-58792971	11.1475	17.5906	-0.658092	0.00035	0.00785859
ENSMUST00000036300	ENSMUSG00000045672	Col27a1	chr4:63215434-63334991	10.4897	17.3217	-0.723602	5e-05	0.00141417
ENSMUST00000024698	ENSMUSG00000023905	Tnfrsf12a	chr17:23675446-23677449	9.30475	13.8787	-0.576828	0.00015	0.00378624
ENSMUST00000022692	ENSMUSG00000022097	Sftpc	chr14:70520940-70524081	0	7.46919	#NAME?	5e-05	0.00141417
ENSMUST00000065134	ENSMUSG00000089762	Ier5l	chr2:30471536-30474219	3.10556	4.23701	-0.448193	0.00235	0.038101
ENSMUST00000146074	ENSMUSG00000074221	Zfp568	chr7:29983954-30028282	1.7171	2.39326	-0.479005	0.0021	0.034862
ENSMUST00000032761	ENSMUSG00000030545	Pex11a	chr7:79735956-79743080	16.4074	21.874	-0.414866	0.00045	0.009687
ENSMUST00000046502	ENSMUSG00000040661	Rad54l2	chr9:106688081-106789194	6.89207	8.96277	-0.379007	0.0006	0.0124324
ENSMUST00000105733	ENSMUSG00000070605	Gm13251	chr4:146449022-146470292	1.58297	2.20962	-0.481161	0.001	0.0189868
ENSMUST00000022322	ENSMUSG00000021794	Glud1	chr14:34310726-34345144	197.717	262.555	-0.409182	0.0008	0.0157593
ENSMUST00000098244	ENSMUSG00000073988	Ttpa	chr4:20007937-20030785	7.69788	11.6356	-0.596016	0.00015	0.00378624
ENSMUST00000025399	ENSMUSG00000024521	Pmaip1	chr18:66458603-66465550	7.73177	11.7236	-0.60054	5e-05	0.00141417
ENSMUST00000065588	ENSMUSG00000105096	Gbp10	chr5:105214906-105293696	0.168088	1.26176	-2.90815	0.0002	0.00485099
ENSMUST00000041982	ENSMUSG00000037548	H2-DMb2	chr17:34145270-34151553	3.71549	22.4055	-2.59223	5e-05	0.00141417
ENSMUST00000152420	ENSMUSG00000074063	Osgin1	chr8:119434123-119446256	14.8947	22.0388	-0.565244	5e-05	0.00141417
ENSMUST00000105502	ENSMUSG00000048756	Foxo3	chr10:42181840-42276755	26.637	35.3535	-0.408423	0.00035	0.00785859
ENSMUST00000126534	ENSMUSG00000033685	Ucp2	chr7:100493336-100502020	7.44741	9.71727	-0.383812	0.00275	0.0432258
ENSMUST00000093852	ENSMUSG00000066687	Zbtb16	chr9:48654310-48835945	6.98101	11.1343	-0.673506	5e-05	0.00141417
ENSMUST00000107094	ENSMUSG00000052684	Jun	chr4:95049033-95067422	9.79209	17.7367	-0.85705	5e-05	0.00141417
ENSMUST00000094134	ENSMUSG00000070427	Il18bp	chr7:102015078-102018155	1.92741	5.28063	-1.45405	5e-05	0.00141417
ENSMUST00000010451	ENSMUSG00000010307	Tmem86a	chr7:47050639-47054776	8.1624	10.9849	-0.428453	0.0013	0.0235944
ENSMUST00000055738	ENSMUSG00000031431	Tsc22d3	chrX:140539527-140600659	42.3031	56.9459	-0.42883	0.00035	0.00785859
ENSMUST00000022480	ENSMUSG00000021913	Ogdhl	chr14:32322018-32347820	1.06364	1.6436	-0.627852	0.00085	0.0165966
ENSMUST00000042818	ENSMUSG00000035828	Pim3	chr15:88862185-88865718	68.6702	96.9393	-0.497398	5e-05	0.00141417
ENSMUST00000020171	ENSMUSG00000019997	Ctgf	chr10:24549446-24598683	25.3902	34.3614	-0.436519	0.0004	0.00878381
ENSMUST00000124158	ENSMUSG00000039652	Cpeb3	chr19:37021290-37222139	9.96147	15.1934	-0.609016	0.00175	0.0300127
ENSMUST00000014957	ENSMUSG00000014813	Stc1	chr14:69029288-69041401	1.82303	3.98407	-1.12791	5e-05	0.00141417
ENSMUST00000025554	ENSMUSG00000024653	Scgb1a1	chr19:9083635-9087958	0	27.5863	#NAME?	5e-05	0.00141417
ENSMUST00000173287	ENSMUSG00000070469	Adamtsl3	chr7:82335731-82614450	0.456467	0.774639	-0.763015	5e-05	0.00141417
ENSMUST00000099126	ENSMUSG00000074622	Mafb	chr2:160363702-160367065	5.35455	8.54381	-0.674115	5e-05	0.00141417
ENSMUST00000025161	ENSMUSG00000024308	Tapbp	chr17:33915898-33929288	25.592	36.7911	-0.523668	0.0004	0.00878381
ENSMUST00000059102	ENSMUSG00000026839	Upp2	chr2:58567386-58792971	7.12986	11.5545	-0.696508	5e-05	0.00141417
ENSMUST00000035266	ENSMUSG00000078853	Igtp	chr11:58199555-58222779	8.55167	19.007	-1.15225	5e-05	0.00141417
ENSMUST00000102476	ENSMUSG00000060802	B2m	chr2:122120107-122186189	373.633	559.486	-0.58248	5e-05	0.00141417
ENSMUST00000069507	ENSMUSG00000073418	C4b	chr17:34728379-34743882	4.08122	25.2265	-2.62787	5e-05	0.00141417
ENSMUST00000041095	ENSMUSG00000078651	Aoc2	chr11:101325062-101329702	0.350073	0.881965	-1.33307	5e-05	0.00141417
ENSMUST00000114232	ENSMUSG00000079547	H2-DMb1	chr17:34153071-34160230	0.767388	3.43099	-2.1606	5e-05	0.00141417
ENSMUST00000114458	ENSMUSG00000035356	Nfkbiz	chr16:55811374-55838899	2.41706	3.59903	-0.574356	0.0002	0.00485099
ENSMUST00000113310	ENSMUSG00000026819	Slc25a25	chr2:32414486-32456953	16.8913	38.1782	-1.17647	5e-05	0.00141417
ENSMUST00000002360	ENSMUSG00000002289	Angptl4	chr17:33773749-33781575	10.5615	26.02	-1.30081	5e-05	0.00141417
ENSMUST00000040828	ENSMUSG00000073421	H2-Ab1	chr17:34263208-34269418	10.8095	37.104	-1.77927	5e-05	0.00141417
ENSMUST00000040820	ENSMUSG00000040147	Maob	chrX:16709281-16817366	2.58952	3.82104	-0.561281	0.00045	0.009687
ENSMUST00000066723	ENSMUSG00000053964	Lgals4	chr7:28833853-28841708	2.14985	3.96915	-0.884596	5e-05	0.00141417
ENSMUST00000068044	ENSMUSG00000022094	Slc39a14	chr14:70303468-70351425	5.48455	8.38725	-0.612824	5e-05	0.00141417
ENSMUST00000028783	ENSMUSG00000027315	Spint1	chr2:119237361-119249527	16.9935	22.7479	-0.420754	0.0023	0.0374907
ENSMUST00000069620	ENSMUSG00000055866	Per2	chr1:91415981-91459324	11.7731	16.6224	-0.497638	5e-05	0.00141417
ENSMUST00000099521	ENSMUSG00000095300	Gm906	chr13:50245180-50250308	5.15986	7.13844	-0.468276	0.00035	0.00785859
ENSMUST00000075858	ENSMUSG00000057425	Ugt2b37	chr5:87240492-87254804	48.3447	63.7795	-0.399735	5e-05	0.00141417
ENSMUST00000174751	ENSMUSG00000036594	H2-Aa	chr17:34282743-34287827	14.0145	36.4409	-1.37864	5e-05	0.00141417
ENSMUST00000043722	ENSMUSG00000033880	Lgals3bp	chr11:118392750-118402092	20.0631	26.336	-0.392495	0.00135	0.0242813
ENSMUST00000020576	ENSMUSG00000020326	Ccng1	chr11:40748551-40755311	60.1764	80.8591	-0.426213	5e-05	0.00141417
ENSMUST00000098109	ENSMUSG00000028454	Pigo	chr4:43017634-43025819	2.27661	3.82809	-0.749737	5e-05	0.00141417
ENSMUST00000034369	ENSMUSG00000031897	Psmb10	chr8:105935727-105938392	8.14038	13.5742	-0.737702	5e-05	0.00141417
ENSMUST00000078084	ENSMUSG00000037266	Rsrp1	chr4:134923591-134927671	43.1942	58.2829	-0.432234	5e-05	0.00141417
ENSMUST00000053764	ENSMUSG00000044167	Foxo1	chr3:52268335-52353221	12.9778	16.8389	-0.375748	0.0012	0.0220581
ENSMUST00000168119	ENSMUSG00000041698	Slco1a1	chr6:141907281-141946962	0.759983	2.29169	-1.59237	5e-05	0.00141417
ENSMUST00000050104	ENSMUSG00000046733	Gprc5a	chr6:135065650-135084709	0.189377	0.454348	-1.26254	0.00165	0.0286638
ENSMUST00000077337	ENSMUSG00000060969	Irx1	chr13:71957920-71963723	2.41919	3.62341	-0.582824	0.00055	0.0115424
ENSMUST00000074043	ENSMUSG00000037465	Klf10	chr15:38294412-38300707	7.51495	11.171	-0.571918	5e-05	0.00141417
ENSMUST00000021271	ENSMUSG00000020893	Per1	chr11:69095216-69109960	10.6648	16.9929	-0.672083	5e-05	0.00141417
ENSMUST00000023829	ENSMUSG00000023067	Cdkn1a	chr17:29090978-29100722	1.84115	4.40698	-1.25918	5e-05	0.00141417
ENSMUST00000103164	ENSMUSG00000076435	Acsf2	chr11:94557101-94601871	7.47402	11.7972	-0.658482	5e-05	0.00141417
ENSMUST00000025363	ENSMUSG00000024486	Hbegf	chr18:36504928-36515805	3.60783	5.94509	-0.720569	5e-05	0.00141417
ENSMUST00000100023	ENSMUSG00000051065	Mb21d2	chr16:28826175-28929698	11.9411	15.6262	-0.388032	0.0009	0.0174274
ENSMUST00000097742	ENSMUSG00000073680	Tmem88b	chr4:155781590-155785874	0.813668	1.31045	-0.687554	0.0004	0.00878381
ENSMUST00000188073	ENSMUSG00000006542	Prkag3	chr1:74738921-74749221	3.31896	6.9282	-1.06175	5e-05	0.00141417
ENSMUST00000038844	ENSMUSG00000035186	Ubd	chr17:37193891-37196095	0.404855	2.89098	-2.83608	5e-05	0.00141417
ENSMUST00000022639	ENSMUSG00000022055	Nefl	chr14:68082589-68124846	0.314884	0.764366	-1.27945	5e-05	0.00141417
ENSMUST00000050073	ENSMUSG00000028035	Dnajb4	chr3:152183954-152210083	13.1657	17.2693	-0.39143	0.00125	0.0228388
ENSMUST00000081435	ENSMUSG00000035929	H2-Q4	chr17:35379616-35384674	10.4695	14.3455	-0.454409	0.0008	0.0157593
ENSMUST00000172785	ENSMUSG00000073411	H2-D1	chr17:35262729-35267499	63.1766	83.3963	-0.400592	0.00035	0.00785859
ENSMUST00000025196	ENSMUSG00000024338	Psmb8	chr17:34197720-34201454	3.31135	11.5788	-1.806	5e-05	0.00141417
ENSMUST00000025197	ENSMUSG00000024339	Tap2	chr17:34203526-34216321	3.52563	5.63644	-0.676902	5e-05	0.00141417
ENSMUST00000054487	ENSMUSG00000022178	Ajuba	chr14:54567468-54577661	4.80406	6.91329	-0.52512	5e-05	0.00141417
ENSMUST00000047404	ENSMUSG00000032435	Dync1li1	chr9:114688789-114724302	30.7486	40.6859	-0.404011	0.00025	0.00588258
ENSMUST00000076521	ENSMUSG00000026638	Irf6	chr1:193153110-193201547	10.1324	12.9639	-0.355527	0.0026	0.0414406
ENSMUST00000029876	ENSMUSG00000028222	Calb1	chr4:15881263-15908064	124.011	189.468	-0.611488	5e-05	0.00141417
ENSMUST00000034215	ENSMUSG00000031765	Mt1	chr8:94179088-94180325	287.82	368.748	-0.357466	0.0014	0.0250158
ENSMUST00000034214	ENSMUSG00000031762	Mt2	chr8:94172617-94173567	112.011	149.239	-0.413983	0.0003	0.00690244
ENSMUST00000090785	ENSMUSG00000038495	Otud7b	chr3:96104526-96161129	1.05821	2.32846	-1.13775	0.00325	0.0493611
ENSMUST00000022977	ENSMUSG00000022351	Sqle	chr15:59315080-59331192	14.416	19.2392	-0.416371	0.0003	0.00690244
ENSMUST00000042196	ENSMUSG00000042116	Vwa1	chr4:155768148-155776161	3.75914	5.70643	-0.602186	5e-05	0.00141417
ENSMUST00000105874	ENSMUSG00000028836	Slc30a2	chr4:134343180-134354484	16.0687	21.6174	-0.427944	0.0011	0.020454
ENSMUST00000077918	ENSMUSG00000058952	Cfi	chr3:129835883-129875332	2.18944	4.19039	-0.936523	5e-05	0.00141417
ENSMUST00000114513	ENSMUSG00000026103	Gls	chr1:52163447-52233232	27.6566	36.885	-0.415411	0.0025	0.0401043
ENSMUST00000076859	ENSMUSG00000028680	Plk3	chr4:117126793-117133963	4.98818	15.6326	-1.64798	5e-05	0.00141417
ENSMUST00000029771	ENSMUSG00000028128	F3	chr3:121723536-121735048	6.87598	10.35	-0.589989	5e-05	0.00141417
ENSMUST00000065060	ENSMUSG00000020023	Tmcc3	chr10:94312023-94612084	8.01884	10.9084	-0.443973	0.0002	0.00485099
ENSMUST00000099575	ENSMUSG00000074934	Grem1	chr2:113746163-113758646	0.153884	0.538978	-1.80839	5e-05	0.00141417
ENSMUST00000105680	ENSMUSG00000039852	Rere	chr4:150281645-150621966	6.77515	11.3752	-0.747564	0.00305	0.0468446
ENSMUST00000042119	ENSMUSG00000041698	Slco1a1	chr6:141907281-141946962	1.51401	4.8846	-1.68986	5e-05	0.00141417
ENSMUST00000161576	ENSMUSG00000031770	Herpud1	chr8:94377920-94395377	184.674	235.775	-0.352429	0.0031	0.0474879
ENSMUST00000030826	ENSMUSG00000028976	Slc2a5	chr4:150119282-150144169	37.2721	51.2997	-0.460856	5e-05	0.00141417
ENSMUST00000030121	ENSMUSG00000028413	B4galt1	chr4:40804601-40854005	19.7176	25.4046	-0.365605	0.0012	0.0220581
ENSMUST00000113553	ENSMUSG00000026213	Stk11ip	chr1:75521528-75537335	2.09608	3.51958	-0.747708	0.00135	0.0242813
ENSMUST00000044021	ENSMUSG00000040918	Slc19a2	chr1:164249045-164265385	3.60725	4.94882	-0.456185	0.00305	0.0468446
ENSMUST00000029053	ENSMUSG00000027540	Ptpn1	chr2:167932326-167979385	11.1776	15.0142	-0.425713	0.0001	0.00265335
ENSMUST00000028593	ENSMUSG00000027171	Prrg4	chr2:104830740-104849876	2.71903	3.87342	-0.510516	0.00075	0.0149651
ENSMUST00000027125	ENSMUSG00000025981	Coq10b	chr1:55052769-55072702	29.663	38.4446	-0.374115	0.0009	0.0174274
ENSMUST00000108140	ENSMUSG00000020684	Rasl10b	chr11:83409136-83421039	0.175748	0.512614	-1.54436	0.00235	0.038101
ENSMUST00000039926	ENSMUSG00000037887	Dusp8	chr7:142079489-142095843	0.577116	1.08888	-0.915911	5e-05	0.00141417
ENSMUST00000170086	ENSMUSG00000037321	Tap1	chr17:34181987-34197225	2.08184	3.91279	-0.910339	5e-05	0.00141417
ENSMUST00000023779	ENSMUSG00000023034	Nr4a1	chr15:101266845-101274792	1.6196	3.41952	-1.07816	5e-05	0.00141417
ENSMUST00000029846	ENSMUSG00000028195	Cyr61	chr3:145646975-145649981	6.57524	14.5861	-1.14947	5e-05	0.00141417
ENSMUST00000079413	ENSMUSG00000024222	Fkbp5	chr17:28399094-28517524	40.6509	64.3451	-0.662542	5e-05	0.00141417
ENSMUST00000038816	ENSMUSG00000034855	Cxcl10	chr5:92331826-92414628	3.66012	7.46973	-1.02916	5e-05	0.00141417
ENSMUST00000000080	ENSMUSG00000000078	Klf6	chr13:5861488-5870393	12.5258	16.0838	-0.360709	0.00175	0.0300127
ENSMUST00000077687	ENSMUSG00000036641	Ccdc148	chr2:58821696-59160683	1.78484	2.44949	-0.456687	0.00295	0.0455823
ENSMUST00000070642	ENSMUSG00000056501	Cebpb	chr2:167688914-167690418	14.1913	24.8778	-0.809849	5e-05	0.00141417
ENSMUST00000058196	ENSMUSG00000021384	Susd3	chr13:49230689-49248706	44.378	60.1667	-0.43912	5e-05	0.00141417
ENSMUST00000069604	ENSMUSG00000029009	Mthfr	chr4:148039076-148059551	3.8071	5.17427	-0.442662	0.0008	0.0157593
ENSMUST00000196733	ENSMUSG00000005968	Tuft1	chr3:94612756-94658872	4.312	7.04972	-0.709209	0.0005	0.0106375
ENSMUST00000042121	ENSMUSG00000037649	H2-DMa	chr17:34135181-34139101	4.83963	12.0005	-1.31013	5e-05	0.00141417
ENSMUST00000056028	ENSMUSG00000042978	Sbk1	chr7:126272618-126295016	17.0266	23.0364	-0.436126	5e-05	0.00141417
ENSMUST00000045903	ENSMUSG00000032536	Trak1	chr9:121366957-121474916	20.0094	25.7395	-0.363305	0.0011	0.020454
ENSMUST00000062322	ENSMUSG00000055491	Pprc1	chr19:46056538-46072915	0.549071	1.03432	-0.913621	0.00125	0.0228388
ENSMUST00000053748	ENSMUSG00000019978	Epb41l2	chr10:25359797-25523519	3.36961	5.5666	-0.724214	5e-05	0.00141417
ENSMUST00000084501	ENSMUSG00000028370	Pappa	chr4:65124173-65357509	1.30124	1.74831	-0.426077	0.0015	0.0264906
ENSMUST00000185752	ENSMUSG00000003051	Elf3	chr1:135253574-135258568	1.53275	3.33887	-1.12324	5e-05	0.00141417
ENSMUST00000020982	ENSMUSG00000020653	Klf11	chr12:24651370-24662774	2.91225	4.96896	-0.770807	5e-05	0.00141417
ENSMUST00000037947	ENSMUSG00000038612	Mcl1	chr3:95658787-95663176	41.521	56.4541	-0.443238	5e-05	0.00141417
ENSMUST00000094819	ENSMUSG00000070806	Zmynd12	chr4:119422813-119453988	0.320116	0.76018	-1.24774	0.0017	0.0293704
ENSMUST00000065080	ENSMUSG00000032120	C2cd2l	chr9:44309236-44320282	21.9243	27.8789	-0.346644	0.00145	0.0257185
ENSMUST00000173320	ENSMUSG00000045374	Wdr81	chr11:75440943-75454717	7.14324	10.0934	-0.498763	0.00125	0.0228388
ENSMUST00000042744	ENSMUSG00000040998	Npnt	chr3:132881744-132950291	23.4414	30.1414	-0.362687	0.00155	0.0272269
ENSMUST00000067124	ENSMUSG00000020593	Lpin1	chr12:16535668-16589770	11.4473	17.6472	-0.624433	5e-05	0.00141417
ENSMUST00000068150	ENSMUSG00000020926	Adam11	chr11:102761438-102780262	0.924957	1.56746	-0.760974	5e-05	0.00141417
ENSMUST00000027279	ENSMUSG00000026107	Nabp1	chr1:51469487-51478425	10.4637	17.3283	-0.727741	5e-05	0.00141417
ENSMUST00000051065	ENSMUSG00000045441	Gprin3	chr6:59347225-59426294	2.55621	3.44145	-0.429007	0.00065	0.0133036
ENSMUST00000036884	ENSMUSG00000033863	Klf9	chr19:23141225-23166911	57.2188	74.6204	-0.383081	0.0005	0.0106375
ENSMUST00000045970	ENSMUSG00000034220	Gpc1	chr1:92831644-92860779	5.38933	7.37407	-0.452355	0.0004	0.00878381
ENSMUST00000121391	ENSMUSG00000012123	Aim1l	chr4:134065911-134092504	1.13236	2.07766	-0.875625	5e-05	0.00141417
ENSMUST00000093962	ENSMUSG00000070348	Ccnd1	chr7:144915099-144939869	137.721	202.906	-0.559061	5e-05	0.00141417
ENSMUST00000031017	ENSMUSG00000029135	Fosl2	chr5:32135800-32157842	3.10351	4.49451	-0.534264	5e-05	0.00141417
ENSMUST00000052172	ENSMUSG00000045382	Cxcr4	chr1:128588198-128592293	1.4372	2.78317	-0.953468	5e-05	0.00141417
ENSMUST00000050467	ENSMUSG00000048546	Tob2	chr15:81848269-81858326	22.3807	32.859	-0.554037	5e-05	0.00141417
