# Supplementary material for: Altered Expression of Long Noncoding and Messenger RNAs in Diabetic Nephropathy following Treatment with Rosiglitazone
Source: Biomed Res Int. 2020 Jan 12;2020:1360843. doi: 10.1155/2020/1360843 (PMC6983290; doi:10.1155/2020/1360843)
Supplement: Supplementary Materials — Supplementary Table 1: significantly upregulated mRNAs in dbdb mice compared to the control group. Supplementary Table 2: significantly downregulated mRNAs in dbdb mice compared to the control group. Supplementary Table 3: significantly upregulated mRNAs in dbR mice compared to the dbdb group. Supplementary Table 4: significantly downregulated mRNAs in dbR mice compared to the dbdb group. Supplementary Table 5: mRNAs significantly upregulated by diabetic nephropathy yet reversed following rosiglitazone treatment. Supplementary Table 6: mRNAs significantly downregulated by diabetic nephropathy yet reversed following rosiglitazone treatment. Supplementary Table 7: significantly upregulated lncRNAs in dbdb mice compared to the control group. Supplementary Table 8: significantly downregulated lncRNAs in dbdb mice compared to the control group. Supplementary Table 9: significantly upregulated lncRNAs in dbR mice compared to the dbdb group. Supplementary Table 10: significantly downregulated lncRNAs in dbR mice compared to the dbdb group. Supplementary Table 11: lncRNAs significantly upregulated by diabetic nephropathy yet reversed following rosiglitazone treatment. Supplementary Table 12: lncRNAs significantly downregulated by diabetic nephropathy yet reversed following rosiglitazone treatment. Supplementary Table 13: differentially expressed lncRNAs colocated with genes. Supplementary Table 14: differentially expressed lncRNAs coexpressed with genes. Supplementary Table 15: top 20 significantly enriched GO terms associated with differentially expressed mRNAs in the kidneys of dbdb mice compared to the controls. Supplementary Table 16: top 20 significantly enriched GO terms associated with differentially expressed mRNAs in the kidneys of dbR mice compared to the dbdb group. Supplementary Table 17: top 20 significantly enriched GO terms associated with differentially expressed lncRNAs coexpressed with genes in the kidneys of dbdb mice compared to the controls. Supplementa [file 1360843.f1.zip › 1360843.f1/Supplementary Table 5.xls]

## Sheet: Sheet1
Supplementary Table 5 mRNAs significantly up-regulated by diabetic nephropathy yet reversed following rosiglitazone treatment
transcript_id	gene_id	gene_name	gene_location	Control_FPKM	dbdb_FPKM	dbR_FPKM	dbdb vs Control log2(foldchange)	dbdb vs Control pvalue	dbdb vs Control qvalue	dbR vs dbdb log2(foldchange)	dbR vs dbdb pvalue	dbR vs dbdb qvalue
ENSMUST00000031327	ENSMUSG00000029380	Cxcl1	chr5:90891240-90893115	0.605678	2.1889	1.12494	-0.960366	0.00195	0.0327838	1.85359	5e-05	0.00141417
ENSMUST00000051672	ENSMUSG00000046718	Bst2	chr8:71534263-71537437	7.98542	15.9751	9.74751	-0.712719	5e-05	0.00141417	1.00038	5e-05	0.00141417
ENSMUST00000144826	ENSMUSG00000023087	Noct	chr3:51224446-51251644	12.0031	20.3387	14.4483	-0.493323	0.00075	0.0149651	0.760822	5e-05	0.00141417
ENSMUST00000003635	ENSMUSG00000003541	Ier3	chr17:35821683-35822923	16.8911	41.1712	24.6981	-0.737238	5e-05	0.00141417	1.28537	5e-05	0.00141417
ENSMUST00000139848	ENSMUSG00000034472	Rasd2	chr8:75213943-75224113	0.655368	2.06586	1.39965	-0.561675	0.0013	0.0235944	1.65636	5e-05	0.00141417
ENSMUST00000027422	ENSMUSG00000026220	Slc16a14	chr1:84905897-84935134	24.6838	60.5904	33.3334	-0.862119	5e-05	0.00141417	1.29553	5e-05	0.00141417
ENSMUST00000041874	ENSMUSG00000042684	Npl	chr1:153503014-153550045	25.8141	63.6329	42.2779	-0.58987	5e-05	0.00141417	1.30161	5e-05	0.00141417
ENSMUST00000023752	ENSMUSG00000023013	Aqp2	chr15:99579055-99584545	33.5748	88.5533	63.983	-0.468859	5e-05	0.00141417	1.39917	5e-05	0.00141417
ENSMUST00000055294	ENSMUSG00000050069	Grem2	chr1:174833784-174921819	0.457391	1.80353	0.478051	-1.91559	5e-05	0.00141417	1.97932	5e-05	0.00141417
ENSMUST00000029865	ENSMUSG00000028211	Trp53inp1	chr4:11156430-11174379	12.092	17.9182	13.9458	-0.3616	0.00105	0.019753	0.56738	5e-05	0.00141417
ENSMUST00000066912	ENSMUSG00000054072	Iigp1	chr18:60376028-60392627	5.36041	18.1292	4.43146	-2.03246	5e-05	0.00141417	1.7579	5e-05	0.00141417
ENSMUST00000141118	ENSMUSG00000032786	Alas1	chr9:106233454-106248126	29	44.5132	29.4926	-0.593879	0.001	0.0189868	0.618179	0.0008	0.0157593
ENSMUST00000035121	ENSMUSG00000032531	Amotl2	chr9:102716671-102733418	18.4329	26.2066	19.5036	-0.42619	0.00025	0.00588258	0.507648	5e-05	0.00141417
ENSMUST00000102678	ENSMUSG00000067212	H2-T23	chr17:36029975-36032855	26.9799	43.3626	24.2201	-0.840247	5e-05	0.00141417	0.684567	5e-05	0.00141417
ENSMUST00000018572	ENSMUSG00000018428	Akap1	chr11:88830791-88881395	13.785	18.483	14.1356	-0.386863	0.00285	0.0444141	0.423102	0.0012	0.0220581
ENSMUST00000127638	ENSMUSG00000004040	Stat3	chr11:100859350-100939540	11.0409	19.2544	13.3218	-0.531395	5e-05	0.00141417	0.80233	5e-05	0.00141417
ENSMUST00000074557	ENSMUSG00000060586	H2-Eb1	chr17:34305876-34316199	28.528	57.1307	20.508	-1.47808	5e-05	0.00141417	1.00189	5e-05	0.00141417
ENSMUST00000037811	ENSMUSG00000020609	Apob	chr12:7977647-8016835	67.5572	143.78	89.164	-0.689327	5e-05	0.00141417	1.08968	5e-05	0.00141417
ENSMUST00000020145	ENSMUSG00000019970	Sgk1	chr10:21882183-21999903	29.5111	202.328	121.426	-0.736622	5e-05	0.00141417	2.77736	5e-05	0.00141417
ENSMUST00000052126	ENSMUSG00000043681	Fam25c	chr14:34351880-34355433	9.98095	20.9031	11.6023	-0.849308	0.0002	0.00485099	1.06647	5e-05	0.00141417
ENSMUST00000037678	ENSMUSG00000034371	Tkfc	chr19:10592199-10604258	106.91	144.763	108.854	-0.411295	0.0001	0.00265335	0.437297	5e-05	0.00141417
ENSMUST00000110103	ENSMUSG00000038508	Gdf15	chr8:70629392-70632456	1.19531	2.61194	1.13108	-1.20742	0.00075	0.0149651	1.12774	5e-05	0.00141417
ENSMUST00000033173	ENSMUSG00000030880	Polr3e	chr7:120917743-120947432	14.6348	27.7864	21.3529	-0.37995	0.0006	0.0124324	0.924978	5e-05	0.00141417
ENSMUST00000034510	ENSMUSG00000032012	Pvrl1	chr9:43738868-43807454	9.56716	20.9041	16.6067	-0.332023	0.00275	0.0432258	1.12762	5e-05	0.00141417
ENSMUST00000042125	ENSMUSG00000033257	Ttll4	chr1:74661744-74703730	5.79464	7.9473	6.14036	-0.372141	0.00285	0.0444141	0.455746	0.0002	0.00485099
ENSMUST00000099309	ENSMUSG00000074768	Bhmt	chr13:93616890-93637961	2.97272	34.9914	27.1548	-0.365791	0.0012	0.0220581	3.55714	5e-05	0.00141417
ENSMUST00000022587	ENSMUSG00000022010	Tsc22d1	chr14:76414960-76507765	104.216	249.467	148.958	-0.743948	5e-05	0.00141417	1.25927	5e-05	0.00141417
ENSMUST00000085635	ENSMUSG00000066595	Mfsd7b	chr1:191005846-191029781	2.21565	6.09424	4.1247	-0.56316	5e-05	0.00141417	1.45972	5e-05	0.00141417
ENSMUST00000004470	ENSMUSG00000004356	Utp20	chr10:88746606-88826814	13.4018	20.7677	16.1994	-0.358403	0.00145	0.0257185	0.631912	5e-05	0.00141417
ENSMUST00000028838	ENSMUSG00000027360	Hdc	chr2:126593666-126618678	0.886852	1.6646	1.06171	-0.648783	0.00175	0.0300127	0.908409	0.0001	0.00265335
ENSMUST00000050487	ENSMUSG00000024610	Cd74	chr18:60803847-60812646	116.42	290.683	87.521	-1.73174	5e-05	0.00141417	1.3201	5e-05	0.00141417
ENSMUST00000113307	ENSMUSG00000026819	Slc25a25	chr2:32414486-32456953	12.6272	40.6711	20.0684	-1.01908	5e-05	0.00141417	1.68747	5e-05	0.00141417
ENSMUST00000047922	ENSMUSG00000034919	Ttc22	chr4:106622431-106640189	1.01785	2.08558	1.36564	-0.610873	0.0021	0.034862	1.03493	5e-05	0.00141417
ENSMUST00000082125	ENSMUSG00000009772	Nuak2	chr1:132316125-132333488	30.4212	70.4843	32.3952	-1.12152	5e-05	0.00141417	1.21223	5e-05	0.00141417
ENSMUST00000031490	ENSMUSG00000029512	Ulk1	chr5:110784487-110810097	11.7118	15.5147	11.9453	-0.377193	0.0011	0.020454	0.405665	0.0002	0.00485099
ENSMUST00000064370	ENSMUSG00000052496	Pkdrej	chr15:85806971-85821733	0.437802	2.39889	1.2813	-0.904761	0.0001	0.00265335	2.45402	5e-05	0.00141417
ENSMUST00000080817	ENSMUSG00000058761	Rnf169	chr7:99920256-99980458	10.1588	13.0538	10.174	-0.359588	0.00105	0.019753	0.361743	0.00075	0.0149651
ENSMUST00000074989	ENSMUSG00000063382	Bcl9l	chr9:44499135-44510388	6.61323	10.4664	8.20943	-0.350404	0.0021	0.034862	0.662332	5e-05	0.00141417
ENSMUST00000042561	ENSMUSG00000038178	Slc43a2	chr11:75531693-75577575	18.8988	35.6546	27.1377	-0.39379	0.00325	0.0493611	0.915796	5e-05	0.00141417
ENSMUST00000074082	ENSMUSG00000032786	Alas1	chr9:106233454-106248126	53.9588	82.3799	55.5412	-0.568734	5e-05	0.00141417	0.610435	5e-05	0.00141417
ENSMUST00000001304	ENSMUSG00000001270	Ckb	chr12:111669354-111672338	14.125	22.7551	17.2056	-0.403311	0.0013	0.0235944	0.687942	5e-05	0.00141417
ENSMUST00000023672	ENSMUSG00000022951	Rcan1	chr16:92391952-92466146	35.1062	70.5287	23.434	-1.58961	5e-05	0.00141417	1.00649	5e-05	0.00141417
ENSMUST00000196520	ENSMUSG00000104713	Gbp6	chr5:105214906-105293696	5.72417	20.785	4.49633	-2.20872	5e-05	0.00141417	1.8604	5e-05	0.00141417
ENSMUST00000049994	ENSMUSG00000048899	Rimkla	chr4:119465282-119492628	0.234256	0.471335	0.264675	-0.832528	0.0018	0.0306903	1.00867	0.0002	0.00485099
ENSMUST00000099623	ENSMUSG00000074968	Ano3	chr2:110655200-110950923	2.19355	5.82027	3.1121	-0.903195	5e-05	0.00141417	1.40782	5e-05	0.00141417
ENSMUST00000169449	ENSMUSG00000027894	Slc6a17	chr3:107467542-107518018	1.39827	1.97676	1.3655	-0.533714	0.0006	0.0124324	0.499493	0.0007	0.0141397
ENSMUST00000165774	ENSMUSG00000028270	Gbp2	chr3:142620601-142638008	4.09659	8.79634	3.63594	-1.27458	5e-05	0.00141417	1.10248	5e-05	0.00141417
ENSMUST00000182625	ENSMUSG00000051817	Sox12	chr2:152393610-152398063	2.35184	3.89084	2.733	-0.509597	0.0001	0.00265335	0.726293	5e-05	0.00141417
ENSMUST00000019721	ENSMUSG00000019577	Pdk4	chr6:5483350-5496309	1.33531	4.27879	2.09274	-1.03181	5e-05	0.00141417	1.68003	5e-05	0.00141417
ENSMUST00000063694	ENSMUSG00000052040	Klf13	chr7:63886350-63938915	11.8717	20.6162	16.2388	-0.344333	0.0021	0.034862	0.796258	5e-05	0.00141417
ENSMUST00000024839	ENSMUSG00000024042	Sik1	chr17:31844247-31855792	16.7627	29.0866	22.0227	-0.401363	0.0003	0.00690244	0.795102	5e-05	0.00141417
ENSMUST00000068023	ENSMUSG00000054793	Cadm4	chr7:24482022-24504539	8.77309	16.4042	12.7809	-0.360074	0.00285	0.0444141	0.902906	5e-05	0.00141417
ENSMUST00000036300	ENSMUSG00000045672	Col27a1	chr4:63215434-63334991	5.42712	17.3217	10.4897	-0.723602	5e-05	0.00141417	1.67432	5e-05	0.00141417
ENSMUST00000022692	ENSMUSG00000022097	Sftpc	chr14:70520940-70524081	3.35871	7.46919	0	#NAME?	5e-05	0.00141417	1.15305	5e-05	0.00141417
ENSMUST00000032761	ENSMUSG00000030545	Pex11a	chr7:79735956-79743080	15.4338	21.874	16.4074	-0.414866	0.00045	0.009687	0.503119	5e-05	0.00141417
ENSMUST00000046502	ENSMUSG00000040661	Rad54l2	chr9:106688081-106789194	7.06556	8.96277	6.89207	-0.379007	0.0006	0.0124324	0.34314	0.0016	0.0279374
ENSMUST00000022322	ENSMUSG00000021794	Glud1	chr14:34310726-34345144	142.384	262.555	197.717	-0.409182	0.0008	0.0157593	0.882828	5e-05	0.00141417
ENSMUST00000098244	ENSMUSG00000073988	Ttpa	chr4:20007937-20030785	4.95204	11.6356	7.69788	-0.596016	0.00015	0.00378624	1.23246	5e-05	0.00141417
ENSMUST00000041982	ENSMUSG00000037548	H2-DMb2	chr17:34145270-34151553	3.5495	22.4055	3.71549	-2.59223	5e-05	0.00141417	2.65816	5e-05	0.00141417
ENSMUST00000105502	ENSMUSG00000048756	Foxo3	chr10:42181840-42276755	16.3321	35.3535	26.637	-0.408423	0.00035	0.00785859	1.11414	5e-05	0.00141417
ENSMUST00000126534	ENSMUSG00000033685	Ucp2	chr7:100493336-100502020	4.68405	9.71727	7.44741	-0.383812	0.00275	0.0432258	1.0528	5e-05	0.00141417
ENSMUST00000093852	ENSMUSG00000066687	Zbtb16	chr9:48654310-48835945	1.63943	11.1343	6.98101	-0.673506	5e-05	0.00141417	2.76375	5e-05	0.00141417
ENSMUST00000107094	ENSMUSG00000052684	Jun	chr4:95049033-95067422	9.25217	17.7367	9.79209	-0.85705	5e-05	0.00141417	0.938875	5e-05	0.00141417
ENSMUST00000094134	ENSMUSG00000070427	Il18bp	chr7:102015078-102018155	1.85625	5.28063	1.92741	-1.45405	5e-05	0.00141417	1.50832	5e-05	0.00141417
ENSMUST00000055738	ENSMUSG00000031431	Tsc22d3	chrX:140539527-140600659	29.0522	56.9459	42.3031	-0.42883	0.00035	0.00785859	0.970947	5e-05	0.00141417
ENSMUST00000042818	ENSMUSG00000035828	Pim3	chr15:88862185-88865718	49.8448	96.9393	68.6702	-0.497398	5e-05	0.00141417	0.959639	5e-05	0.00141417
ENSMUST00000020171	ENSMUSG00000019997	Ctgf	chr10:24549446-24598683	16.1083	34.3614	25.3902	-0.436519	0.0004	0.00878381	1.09299	5e-05	0.00141417
ENSMUST00000124158	ENSMUSG00000039652	Cpeb3	chr19:37021290-37222139	8.41346	15.1934	9.96147	-0.609016	0.00175	0.0300127	0.852676	5e-05	0.00141417
ENSMUST00000014957	ENSMUSG00000014813	Stc1	chr14:69029288-69041401	2.06539	3.98407	1.82303	-1.12791	5e-05	0.00141417	0.947828	5e-05	0.00141417
ENSMUST00000025554	ENSMUSG00000024653	Scgb1a1	chr19:9083635-9087958	12.8567	27.5863	0	#NAME?	5e-05	0.00141417	1.10143	5e-05	0.00141417
ENSMUST00000173287	ENSMUSG00000070469	Adamtsl3	chr7:82335731-82614450	0.170623	0.774639	0.456467	-0.763015	5e-05	0.00141417	2.18272	5e-05	0.00141417
ENSMUST00000099126	ENSMUSG00000074622	Mafb	chr2:160363702-160367065	4.73458	8.54381	5.35455	-0.674115	5e-05	0.00141417	0.851642	5e-05	0.00141417
ENSMUST00000025161	ENSMUSG00000024308	Tapbp	chr17:33915898-33929288	24.9869	36.7911	25.592	-0.523668	0.0004	0.00878381	0.558186	0.0001	0.00265335
ENSMUST00000035266	ENSMUSG00000078853	Igtp	chr11:58199555-58222779	10.3562	19.007	8.55167	-1.15225	5e-05	0.00141417	0.876038	0.00025	0.00588258
ENSMUST00000102476	ENSMUSG00000060802	B2m	chr2:122120107-122186189	358.427	559.486	373.633	-0.58248	5e-05	0.00141417	0.642422	5e-05	0.00141417
ENSMUST00000069507	ENSMUSG00000073418	C4b	chr17:34728379-34743882	6.25752	25.2265	4.08122	-2.62787	5e-05	0.00141417	2.01128	5e-05	0.00141417
ENSMUST00000114232	ENSMUSG00000079547	H2-DMb1	chr17:34153071-34160230	0.628618	3.43099	0.767388	-2.1606	5e-05	0.00141417	2.44837	5e-05	0.00141417
ENSMUST00000114458	ENSMUSG00000035356	Nfkbiz	chr16:55811374-55838899	1.85383	3.59903	2.41706	-0.574356	0.0002	0.00485099	0.957097	5e-05	0.00141417
ENSMUST00000113310	ENSMUSG00000026819	Slc25a25	chr2:32414486-32456953	11.9267	38.1782	16.8913	-1.17647	5e-05	0.00141417	1.67855	5e-05	0.00141417
ENSMUST00000002360	ENSMUSG00000002289	Angptl4	chr17:33773749-33781575	6.97648	26.02	10.5615	-1.30081	5e-05	0.00141417	1.89905	5e-05	0.00141417
ENSMUST00000040828	ENSMUSG00000073421	H2-Ab1	chr17:34263208-34269418	11.5312	37.104	10.8095	-1.77927	5e-05	0.00141417	1.68604	5e-05	0.00141417
ENSMUST00000040820	ENSMUSG00000040147	Maob	chrX:16709281-16817366	1.07947	3.82104	2.58952	-0.561281	0.00045	0.009687	1.82363	5e-05	0.00141417
ENSMUST00000066723	ENSMUSG00000053964	Lgals4	chr7:28833853-28841708	1.95575	3.96915	2.14985	-0.884596	5e-05	0.00141417	1.02111	5e-05	0.00141417
ENSMUST00000068044	ENSMUSG00000022094	Slc39a14	chr14:70303468-70351425	5.01764	8.38725	5.48455	-0.612824	5e-05	0.00141417	0.741187	5e-05	0.00141417
ENSMUST00000069620	ENSMUSG00000055866	Per2	chr1:91415981-91459324	7.17497	16.6224	11.7731	-0.497638	5e-05	0.00141417	1.21208	5e-05	0.00141417
ENSMUST00000174751	ENSMUSG00000036594	H2-Aa	chr17:34282743-34287827	21.1233	36.4409	14.0145	-1.37864	5e-05	0.00141417	0.786727	5e-05	0.00141417
ENSMUST00000043722	ENSMUSG00000033880	Lgals3bp	chr11:118392750-118402092	17.8885	26.336	20.0631	-0.392495	0.00135	0.0242813	0.558004	5e-05	0.00141417
ENSMUST00000034369	ENSMUSG00000031897	Psmb10	chr8:105935727-105938392	7.12195	13.5742	8.14038	-0.737702	5e-05	0.00141417	0.930526	5e-05	0.00141417
ENSMUST00000053764	ENSMUSG00000044167	Foxo1	chr3:52268335-52353221	9.90471	16.8389	12.9778	-0.375748	0.0012	0.0220581	0.765613	5e-05	0.00141417
ENSMUST00000074043	ENSMUSG00000037465	Klf10	chr15:38294412-38300707	7.09576	11.171	7.51495	-0.571918	5e-05	0.00141417	0.654724	5e-05	0.00141417
ENSMUST00000021271	ENSMUSG00000020893	Per1	chr11:69095216-69109960	5.66886	16.9929	10.6648	-0.672083	5e-05	0.00141417	1.58381	5e-05	0.00141417
ENSMUST00000023829	ENSMUSG00000023067	Cdkn1a	chr17:29090978-29100722	1.10545	4.40698	1.84115	-1.25918	5e-05	0.00141417	1.99516	5e-05	0.00141417
ENSMUST00000103164	ENSMUSG00000076435	Acsf2	chr11:94557101-94601871	4.33319	11.7972	7.47402	-0.658482	5e-05	0.00141417	1.44494	5e-05	0.00141417
ENSMUST00000100023	ENSMUSG00000051065	Mb21d2	chr16:28826175-28929698	9.75918	15.6262	11.9411	-0.388032	0.0009	0.0174274	0.679133	5e-05	0.00141417
ENSMUST00000188073	ENSMUSG00000006542	Prkag3	chr1:74738921-74749221	2.12813	6.9282	3.31896	-1.06175	5e-05	0.00141417	1.7029	5e-05	0.00141417
ENSMUST00000022639	ENSMUSG00000022055	Nefl	chr14:68082589-68124846	0.197577	0.764366	0.314884	-1.27945	5e-05	0.00141417	1.95185	5e-05	0.00141417
ENSMUST00000081435	ENSMUSG00000035929	H2-Q4	chr17:35379616-35384674	10.7625	14.3455	10.4695	-0.454409	0.0008	0.0157593	0.414579	0.00215	0.0355551
ENSMUST00000025196	ENSMUSG00000024338	Psmb8	chr17:34197720-34201454	3.44275	11.5788	3.31135	-1.806	5e-05	0.00141417	1.74986	5e-05	0.00141417
ENSMUST00000025197	ENSMUSG00000024339	Tap2	chr17:34203526-34216321	3.53894	5.63644	3.52563	-0.676902	5e-05	0.00141417	0.671467	5e-05	0.00141417
ENSMUST00000029876	ENSMUSG00000028222	Calb1	chr4:15881263-15908064	42.7492	189.468	124.011	-0.611488	5e-05	0.00141417	2.14799	5e-05	0.00141417
ENSMUST00000034215	ENSMUSG00000031765	Mt1	chr8:94179088-94180325	132.001	368.748	287.82	-0.357466	0.0014	0.0250158	1.48208	5e-05	0.00141417
ENSMUST00000034214	ENSMUSG00000031762	Mt2	chr8:94172617-94173567	61.873	149.239	112.011	-0.413983	0.0003	0.00690244	1.27025	5e-05	0.00141417
ENSMUST00000090785	ENSMUSG00000038495	Otud7b	chr3:96104526-96161129	1.12102	2.32846	1.05821	-1.13775	0.00325	0.0493611	1.05457	0.00165	0.0286638
ENSMUST00000077918	ENSMUSG00000058952	Cfi	chr3:129835883-129875332	2.30174	4.19039	2.18944	-0.936523	5e-05	0.00141417	0.864361	5e-05	0.00141417
ENSMUST00000076859	ENSMUSG00000028680	Plk3	chr4:117126793-117133963	2.77268	15.6326	4.98818	-1.64798	5e-05	0.00141417	2.49521	5e-05	0.00141417
ENSMUST00000065060	ENSMUSG00000020023	Tmcc3	chr10:94312023-94612084	7.94375	10.9084	8.01884	-0.443973	0.0002	0.00485099	0.457547	0.0001	0.00265335
ENSMUST00000099575	ENSMUSG00000074934	Grem1	chr2:113746163-113758646	0.0500239	0.538978	0.153884	-1.80839	5e-05	0.00141417	3.42954	5e-05	0.00141417
ENSMUST00000161576	ENSMUSG00000031770	Herpud1	chr8:94377920-94395377	140.762	235.775	184.674	-0.352429	0.0031	0.0474879	0.74415	5e-05	0.00141417
ENSMUST00000030826	ENSMUSG00000028976	Slc2a5	chr4:150119282-150144169	34.4449	51.2997	37.2721	-0.460856	5e-05	0.00141417	0.57466	5e-05	0.00141417
ENSMUST00000030121	ENSMUSG00000028413	B4galt1	chr4:40804601-40854005	18.0974	25.4046	19.7176	-0.365605	0.0012	0.0220581	0.489304	5e-05	0.00141417
ENSMUST00000029053	ENSMUSG00000027540	Ptpn1	chr2:167932326-167979385	9.0606	15.0142	11.1776	-0.425713	0.0001	0.00265335	0.72865	5e-05	0.00141417
ENSMUST00000039926	ENSMUSG00000037887	Dusp8	chr7:142079489-142095843	0.622292	1.08888	0.577116	-0.915911	5e-05	0.00141417	0.80718	5e-05	0.00141417
ENSMUST00000170086	ENSMUSG00000037321	Tap1	chr17:34181987-34197225	2.28948	3.91279	2.08184	-0.910339	5e-05	0.00141417	0.773177	0.0001	0.00265335
ENSMUST00000023779	ENSMUSG00000023034	Nr4a1	chr15:101266845-101274792	1.10933	3.41952	1.6196	-1.07816	5e-05	0.00141417	1.6241	5e-05	0.00141417
ENSMUST00000079413	ENSMUSG00000024222	Fkbp5	chr17:28399094-28517524	18.4589	64.3451	40.6509	-0.662542	5e-05	0.00141417	1.80151	5e-05	0.00141417
ENSMUST00000070642	ENSMUSG00000056501	Cebpb	chr2:167688914-167690418	8.76555	24.8778	14.1913	-0.809849	5e-05	0.00141417	1.50494	5e-05	0.00141417
ENSMUST00000058196	ENSMUSG00000021384	Susd3	chr13:49230689-49248706	33.7345	60.1667	44.378	-0.43912	5e-05	0.00141417	0.834743	5e-05	0.00141417
ENSMUST00000069604	ENSMUSG00000029009	Mthfr	chr4:148039076-148059551	3.82025	5.17427	3.8071	-0.442662	0.0008	0.0157593	0.437689	0.00045	0.009687
ENSMUST00000042121	ENSMUSG00000037649	H2-DMa	chr17:34135181-34139101	4.23287	12.0005	4.83963	-1.31013	5e-05	0.00141417	1.50339	5e-05	0.00141417
ENSMUST00000056028	ENSMUSG00000042978	Sbk1	chr7:126272618-126295016	16.314	23.0364	17.0266	-0.436126	5e-05	0.00141417	0.497804	5e-05	0.00141417
ENSMUST00000045903	ENSMUSG00000032536	Trak1	chr9:121366957-121474916	14.9825	25.7395	20.0094	-0.363305	0.0011	0.020454	0.780708	5e-05	0.00141417
ENSMUST00000084501	ENSMUSG00000028370	Pappa	chr4:65124173-65357509	0.755577	1.74831	1.30124	-0.426077	0.0015	0.0264906	1.21031	5e-05	0.00141417
ENSMUST00000020982	ENSMUSG00000020653	Klf11	chr12:24651370-24662774	2.47606	4.96896	2.91225	-0.770807	5e-05	0.00141417	1.0049	5e-05	0.00141417
ENSMUST00000037947	ENSMUSG00000038612	Mcl1	chr3:95658787-95663176	43.4286	56.4541	41.521	-0.443238	5e-05	0.00141417	0.378435	0.00065	0.0133036
ENSMUST00000065080	ENSMUSG00000032120	C2cd2l	chr9:44309236-44320282	22.245	27.8789	21.9243	-0.346644	0.00145	0.0257185	0.325692	0.0033	0.0499537
ENSMUST00000042744	ENSMUSG00000040998	Npnt	chr3:132881744-132950291	16.6257	30.1414	23.4414	-0.362687	0.00155	0.0272269	0.858335	5e-05	0.00141417
ENSMUST00000067124	ENSMUSG00000020593	Lpin1	chr12:16535668-16589770	10.5495	17.6472	11.4473	-0.624433	5e-05	0.00141417	0.742268	5e-05	0.00141417
ENSMUST00000068150	ENSMUSG00000020926	Adam11	chr11:102761438-102780262	1.088	1.56746	0.924957	-0.760974	5e-05	0.00141417	0.526752	0.0018	0.0306903
ENSMUST00000051065	ENSMUSG00000045441	Gprin3	chr6:59347225-59426294	2.66585	3.44145	2.55621	-0.429007	0.00065	0.0133036	0.368417	0.00275	0.0432258
ENSMUST00000121391	ENSMUSG00000012123	Aim1l	chr4:134065911-134092504	0.506115	2.07766	1.13236	-0.875625	5e-05	0.00141417	2.03742	5e-05	0.00141417
ENSMUST00000093962	ENSMUSG00000070348	Ccnd1	chr7:144915099-144939869	120.297	202.906	137.721	-0.559061	5e-05	0.00141417	0.754218	5e-05	0.00141417
ENSMUST00000031017	ENSMUSG00000029135	Fosl2	chr5:32135800-32157842	2.71701	4.49451	3.10351	-0.534264	5e-05	0.00141417	0.726147	5e-05	0.00141417
ENSMUST00000050467	ENSMUSG00000048546	Tob2	chr15:81848269-81858326	14.4077	32.859	22.3807	-0.554037	5e-05	0.00141417	1.18945	5e-05	0.00141417
