# Supplementary material for: Altered Expression of Long Noncoding and Messenger RNAs in Diabetic Nephropathy following Treatment with Rosiglitazone
Source: Biomed Res Int. 2020 Jan 12;2020:1360843. doi: 10.1155/2020/1360843 (PMC6983290; doi:10.1155/2020/1360843)
Supplement: Supplementary Materials — Supplementary Table 1: significantly upregulated mRNAs in dbdb mice compared to the control group. Supplementary Table 2: significantly downregulated mRNAs in dbdb mice compared to the control group. Supplementary Table 3: significantly upregulated mRNAs in dbR mice compared to the dbdb group. Supplementary Table 4: significantly downregulated mRNAs in dbR mice compared to the dbdb group. Supplementary Table 5: mRNAs significantly upregulated by diabetic nephropathy yet reversed following rosiglitazone treatment. Supplementary Table 6: mRNAs significantly downregulated by diabetic nephropathy yet reversed following rosiglitazone treatment. Supplementary Table 7: significantly upregulated lncRNAs in dbdb mice compared to the control group. Supplementary Table 8: significantly downregulated lncRNAs in dbdb mice compared to the control group. Supplementary Table 9: significantly upregulated lncRNAs in dbR mice compared to the dbdb group. Supplementary Table 10: significantly downregulated lncRNAs in dbR mice compared to the dbdb group. Supplementary Table 11: lncRNAs significantly upregulated by diabetic nephropathy yet reversed following rosiglitazone treatment. Supplementary Table 12: lncRNAs significantly downregulated by diabetic nephropathy yet reversed following rosiglitazone treatment. Supplementary Table 13: differentially expressed lncRNAs colocated with genes. Supplementary Table 14: differentially expressed lncRNAs coexpressed with genes. Supplementary Table 15: top 20 significantly enriched GO terms associated with differentially expressed mRNAs in the kidneys of dbdb mice compared to the controls. Supplementary Table 16: top 20 significantly enriched GO terms associated with differentially expressed mRNAs in the kidneys of dbR mice compared to the dbdb group. Supplementary Table 17: top 20 significantly enriched GO terms associated with differentially expressed lncRNAs coexpressed with genes in the kidneys of dbdb mice compared to the controls. Supplementa [file 1360843.f1.zip › 1360843.f1/Supplementary Table 6.xls]

## Sheet: Sheet1
Supplementary Table 6 mRNAs significantly down-regulated by diabetic nephropathy yet reversed following rosiglitazone treatment
transcript_id	gene_id	gene_name	gene_location	Control_FPKM	dbdb_FPKM	dbR_FPKM	dbdb vs Control log2(foldchange)	dbdb vs Control pvalue	dbdb vs Control qvalue	dbR vs dbdb log2(foldchange)	dbR vs dbdb pvalue	dbR vs dbdb qvalue
ENSMUST00000020403	ENSMUSG00000020186	Csrp2	chr10:110920176-110939599	151.997	107.172	142.048	0.406458	0.0002	0.00485099	-0.504119	5e-05	0.00141417
ENSMUST00000070215	ENSMUSG00000056209	Npm3	chr19:45747733-45749591	40.6596	14.1619	19.4103	0.454807	0.00135	0.0242813	-1.52158	5e-05	0.00141417
ENSMUST00000057019	ENSMUSG00000044338	Aplnr	chr2:85136224-85139923	2.6525	0.628609	1.15329	0.875517	0.0001	0.00265335	-2.07712	5e-05	0.00141417
ENSMUST00000026700	ENSMUSG00000025610	Map3k7cl	chr16:87553329-87595336	22.3689	9.78812	13.5658	0.470869	0.0005	0.0106375	-1.19239	5e-05	0.00141417
ENSMUST00000090070	ENSMUSG00000054435	Gimap4	chr6:48684548-48692060	21.7848	14.1267	20.081	0.507402	0.00015	0.00378624	-0.624899	5e-05	0.00141417
ENSMUST00000103194	ENSMUSG00000000805	Car4	chr11:84957787-84966044	137.309	51.099	81.8652	0.679954	5e-05	0.00141417	-1.42606	5e-05	0.00141417
ENSMUST00000028663	ENSMUSG00000027230	Creb3l1	chr2:91982327-92024502	1.19442	0.602646	1.19037	0.982032	0.0001	0.00265335	-0.986925	0.0001	0.00265335
ENSMUST00000030964	ENSMUSG00000029084	Cd38	chr5:43868552-43912375	3.86479	2.82493	4.03899	0.515781	0.00035	0.00785859	-0.452175	0.0017	0.0293704
ENSMUST00000034178	ENSMUSG00000031725	Ces1f	chr8:93256235-93279747	590.129	176.49	234.83	0.412032	0.00025	0.00588258	-1.74145	5e-05	0.00141417
ENSMUST00000015511	ENSMUSG00000030123	Plxnd1	chr6:115954810-115995005	8.4088	5.33821	7.4397	0.478889	0.0001	0.00265335	-0.655543	5e-05	0.00141417
ENSMUST00000092163	ENSMUSG00000069516	Lyz2	chr10:117277333-117282274	13.2996	6.04549	8.67883	0.521641	0.0009	0.0174274	-1.13745	5e-05	0.00141417
ENSMUST00000035390	ENSMUSG00000037053	Azgp1	chr5:137981538-137990233	134.575	29.5199	55.8281	0.919302	5e-05	0.00141417	-2.18865	5e-05	0.00141417
ENSMUST00000060598	ENSMUSG00000044249	Defb29	chr2:152538713-152540098	93.8538	47.4057	70.5083	0.572732	0.0001	0.00265335	-0.985355	5e-05	0.00141417
ENSMUST00000012587	ENSMUSG00000012443	Kif11	chr19:37376402-37421859	0.69054	0.366676	0.674318	0.878923	0.0002	0.00485099	-0.913221	5e-05	0.00141417
ENSMUST00000046522	ENSMUSG00000040283	Btnl9	chr11:49165584-49187159	3.96051	1.90395	4.58586	1.26819	5e-05	0.00141417	-1.05669	5e-05	0.00141417
ENSMUST00000029046	ENSMUSG00000027533	Fabp5	chr3:10012547-10016607	7.05094	2.63935	4.6086	0.804146	0.0004	0.00878381	-1.41763	5e-05	0.00141417
ENSMUST00000029041	ENSMUSG00000062515	Fabp4	chr3:10204087-10208576	36.2773	25.8917	44.9093	0.794522	5e-05	0.00141417	-0.486575	5e-05	0.00141417
ENSMUST00000004673	ENSMUSG00000004558	Ndrg2	chr14:51905270-51913488	24.0571	15.0343	21.4361	0.511784	0.0004	0.00878381	-0.678204	5e-05	0.00141417
ENSMUST00000078869	ENSMUSG00000071177	Serpina1d	chr12:103728155-103830373	94.0893	50.1955	72.9407	0.539165	5e-05	0.00141417	-0.906472	5e-05	0.00141417
ENSMUST00000034594	ENSMUSG00000032089	Il10ra	chr9:45253836-45269149	1.41929	0.526801	0.904952	0.780584	0.00075	0.0149651	-1.42984	5e-05	0.00141417
ENSMUST00000027675	ENSMUSG00000026417	Pigr	chr1:130826683-130852249	99.5885	75.8117	106.306	0.487727	0.00035	0.00785859	-0.393558	0.0029	0.0449794
ENSMUST00000064862	ENSMUSG00000054385	Ceacam2	chr7:25516041-25539857	3.68517	0.894232	2.40326	1.42627	5e-05	0.00141417	-2.04301	5e-05	0.00141417
ENSMUST00000032518	ENSMUSG00000030364	Clec2h	chr6:128662384-128677374	16.9201	5.83429	10.6877	0.873316	5e-05	0.00141417	-1.53611	5e-05	0.00141417
ENSMUST00000029671	ENSMUSG00000028037	Ifi44	chr3:151730921-151749960	4.93644	3.08024	4.27775	0.473808	0.001	0.0189868	-0.680427	5e-05	0.00141417
ENSMUST00000080995	ENSMUSG00000060044	Tmem26	chr10:68723745-68782654	7.11481	4.64244	6.98798	0.589993	5e-05	0.00141417	-0.615943	5e-05	0.00141417
ENSMUST00000045008	ENSMUSG00000033634	Cml2	chr6:85865421-85869158	22.1918	13.9415	17.9093	0.361328	0.0015	0.0264906	-0.670649	5e-05	0.00141417
ENSMUST00000092584	ENSMUSG00000069662	Marcks	chr10:37133374-37138920	9.47934	5.81682	9.44537	0.699376	5e-05	0.00141417	-0.704556	5e-05	0.00141417
ENSMUST00000023835	ENSMUSG00000023073	Slc10a2	chr8:5085622-5105232	22.1223	14.2128	18.4905	0.37959	0.00265	0.0420006	-0.638311	5e-05	0.00141417
ENSMUST00000113516	ENSMUSG00000062960	Kdr	chr5:75932826-75978458	25.2262	19.8807	28.498	0.519494	5e-05	0.00141417	-0.343557	0.0015	0.0264906
ENSMUST00000022861	ENSMUSG00000072664	Ugt3a1	chr15:9279828-9315032	209.874	99.6574	136.106	0.449677	0.00015	0.00378624	-1.07448	5e-05	0.00141417
ENSMUST00000117160	ENSMUSG00000031841	Cdh13	chr8:118283732-119324921	1.14074	0.527141	1.32454	1.32923	5e-05	0.00141417	-1.11371	5e-05	0.00141417
ENSMUST00000198584	ENSMUSG00000050315	Synpo2	chr3:123076518-123236147	0.890529	0.491564	0.923226	0.909306	5e-05	0.00141417	-0.857284	0.0002	0.00485099
ENSMUST00000109225	ENSMUSG00000040413	Timd2	chr11:46668959-46707061	52.8639	23.7511	36.5545	0.622055	5e-05	0.00141417	-1.15429	5e-05	0.00141417
ENSMUST00000027056	ENSMUSG00000048960	Prex2	chr1:10993464-11303681	5.87813	4.46624	5.95999	0.416247	0.00015	0.00378624	-0.396295	0.0005	0.0106375
ENSMUST00000079081	ENSMUSG00000024411	Aqp4	chr18:15389393-15403684	15.9884	5.44182	7.36234	0.436076	0.0003	0.00690244	-1.55486	5e-05	0.00141417
ENSMUST00000194649	ENSMUSG00000039221	Rpl22l1	chr3:28805435-28813985	44.9088	31.0941	51.1007	0.716703	5e-05	0.00141417	-0.530358	0.00185	0.031399
ENSMUST00000031565	ENSMUSG00000029581	Fscn1	chr5:142960342-142973185	2.83345	1.7075	2.93748	0.78269	0.00015	0.00378624	-0.730673	0.00025	0.00588258
ENSMUST00000096431	ENSMUSG00000053852	Adgrg4	chrX:56870162-57001558	5.50596	2.23688	5.00643	1.16229	5e-05	0.00141417	-1.2995	5e-05	0.00141417
ENSMUST00000031093	ENSMUSG00000029193	Cckar	chr5:53697775-53707705	37.42	13.0573	18.0123	0.464127	5e-05	0.00141417	-1.51896	5e-05	0.00141417
ENSMUST00000022718	ENSMUSG00000022122	Ednrb	chr14:103814624-103844173	4.61362	1.74194	4.13419	1.24691	0.00155	0.0272269	-1.40521	0.0005	0.0106375
ENSMUST00000022995	ENSMUSG00000022366	Slc22a22	chr15:57243766-57477625	95.6096	46.3723	67.025	0.531436	5e-05	0.00141417	-1.04389	5e-05	0.00141417
ENSMUST00000024031	ENSMUSG00000023262	Acy1	chr9:106432980-106438319	77.2745	47.6107	73.7963	0.632262	5e-05	0.00141417	-0.698705	5e-05	0.00141417
ENSMUST00000039026	ENSMUSG00000037010	Apln	chrX:48025145-48034853	2.34584	0.664696	1.02654	0.62702	0.0029	0.0449794	-1.81934	5e-05	0.00141417
ENSMUST00000164192	ENSMUSG00000071042	Rasgrp3	chr17:75435904-75529043	3.57024	2.27367	3.21622	0.500342	0.00175	0.0300127	-0.650997	5e-05	0.00141417
ENSMUST00000033310	ENSMUSG00000031004	Mki67	chr7:135689787-135716379	1.62925	0.928654	1.98347	1.09482	5e-05	0.00141417	-0.810995	5e-05	0.00141417
ENSMUST00000062893	ENSMUSG00000045328	Cenpe	chr3:135212536-135273611	0.583984	0.28767	0.450056	0.645692	0.0018	0.0306903	-1.02152	5e-05	0.00141417
ENSMUST00000018963	ENSMUSG00000018819	Lsp1	chr7:142460808-142516008	1.07373	0.227997	0.863385	1.92099	0.0029	0.0449794	-2.23554	5e-05	0.00141417
ENSMUST00000034026	ENSMUSG00000031613	Hpgd	chr8:56294551-56321046	4.50699	2.62	3.99206	0.607568	0.00075	0.0149651	-0.782601	0.0001	0.00265335
ENSMUST00000120990	ENSMUSG00000051041	Olfml1	chr7:107567445-107591094	4.85403	3.24001	6.13685	0.921501	5e-05	0.00141417	-0.583187	0.0006	0.0124324
ENSMUST00000079400	ENSMUSG00000037686	Aspg	chr12:112106682-112127573	14.0822	7.12834	9.49558	0.41369	0.0011	0.020454	-0.982238	5e-05	0.00141417
ENSMUST00000147105	ENSMUSG00000027201	Myef2	chr2:125068123-125123661	3.39453	1.64279	2.9138	0.826757	0.003	0.0461893	-1.04707	0.00135	0.0242813
ENSMUST00000023538	ENSMUSG00000022836	Mylk	chr16:34784920-35002420	15.155	12.0202	17.0471	0.504062	5e-05	0.00141417	-0.33433	0.0022	0.0361992
ENSMUST00000026917	ENSMUSG00000025810	Nrp1	chr8:128359072-128505462	25.6338	17.6913	23.2262	0.392718	0.0002	0.00485099	-0.535009	5e-05	0.00141417
ENSMUST00000044165	ENSMUSG00000039115	Itga9	chr9:118606689-118901003	3.263	2.13401	2.86918	0.427067	0.0012	0.0220581	-0.612631	5e-05	0.00141417
ENSMUST00000069423	ENSMUSG00000027239	Mdk	chr2:91929804-91932297	49.0898	29.3367	39.0177	0.411419	0.0029	0.0449794	-0.742713	5e-05	0.00141417
ENSMUST00000015712	ENSMUSG00000015568	Lpl	chr8:68880490-68906934	156.901	44.7723	60.743	0.440113	0.00015	0.00378624	-1.80918	5e-05	0.00141417
ENSMUST00000047095	ENSMUSG00000037780	Mbl1	chr14:41151455-41158959	1.84438	0.955273	2.43399	1.34934	5e-05	0.00141417	-0.94915	0.0025	0.0401043
ENSMUST00000171929	ENSMUSG00000026605	Cenpf	chr1:189640605-189688086	0.501944	0.268934	0.477201	0.827343	5e-05	0.00141417	-0.900272	5e-05	0.00141417
ENSMUST00000102707	ENSMUSG00000028713	Cyp4b1	chr4:115624724-115647723	2043.06	575.507	843.659	0.551826	5e-05	0.00141417	-1.82783	5e-05	0.00141417
ENSMUST00000048010	ENSMUSG00000039497	Dse	chr10:34151393-34207551	1.85036	1.32029	2.31799	0.812017	5e-05	0.00141417	-0.48695	0.00235	0.038101
ENSMUST00000113532	ENSMUSG00000055632	Hmcn2	chr2:31314414-31460738	0.67543	0.448231	0.615866	0.458372	0.00195	0.0327838	-0.591563	5e-05	0.00141417
ENSMUST00000000188	ENSMUSG00000000184	Ccnd2	chr6:127125161-127152193	4.51474	3.0139	4.20881	0.481781	5e-05	0.00141417	-0.58301	5e-05	0.00141417
ENSMUST00000003569	ENSMUSG00000003477	Inmt	chr6:55170625-55175043	1071.92	435.966	571.679	0.39099	0.00055	0.0115424	-1.29792	5e-05	0.00141417
ENSMUST00000023243	ENSMUSG00000022579	Gpihbp1	chr15:75596627-75599481	11.6978	6.40932	11.4663	0.839157	5e-05	0.00141417	-0.867995	5e-05	0.00141417
ENSMUST00000047761	ENSMUSG00000022132	Cldn10	chr14:118787907-118875489	131.023	69.2351	90.7638	0.390613	0.0012	0.0220581	-0.920249	5e-05	0.00141417
ENSMUST00000087033	ENSMUSG00000067149	Jchain	chr5:88520511-88527891	3.46	0.841227	1.892	1.16934	5e-05	0.00141417	-2.0402	5e-05	0.00141417
ENSMUST00000087883	ENSMUSG00000026043	Col3a1	chr1:45311537-45349706	7.03049	3.05496	4.93429	0.691687	5e-05	0.00141417	-1.20247	5e-05	0.00141417
ENSMUST00000020579	ENSMUSG00000020330	Hmmr	chr11:40701394-40733422	0.662438	0.326846	0.807615	1.30506	5e-05	0.00141417	-1.01918	5e-05	0.00141417
ENSMUST00000089129	ENSMUSG00000068086	Cyp2d9	chr15:82452376-82456827	163.563	115.079	198.883	0.789289	5e-05	0.00141417	-0.507219	5e-05	0.00141417
ENSMUST00000066529	ENSMUSG00000022206	Npr3	chr15:11839895-11905674	5.94736	2.81998	6.19414	1.13522	5e-05	0.00141417	-1.07656	5e-05	0.00141417
ENSMUST00000021853	ENSMUSG00000021416	Eci3	chr13:34924408-34963810	227.385	112.165	147.812	0.398145	0.0002	0.00485099	-1.01951	5e-05	0.00141417
ENSMUST00000095360	ENSMUSG00000020053	Igf1	chr10:87858264-87937042	1.25806	0.703634	1.11571	0.665062	0.00015	0.00378624	-0.838305	5e-05	0.00141417
ENSMUST00000073388	ENSMUSG00000017718	Afmid	chr11:117809667-117839908	47.9161	32.3982	45.4541	0.488499	0.003	0.0461893	-0.564598	0.00065	0.0133036
ENSMUST00000032260	ENSMUSG00000030157	Clec2d	chr6:129180614-129186534	57.8228	33.9012	47.5238	0.487314	5e-05	0.00141417	-0.770302	5e-05	0.00141417
ENSMUST00000111868	ENSMUSG00000030228	Pik3c2g	chr6:139715860-139969284	0.525838	0.255691	0.630739	1.30264	5e-05	0.00141417	-1.04022	0.00035	0.00785859
ENSMUST00000041331	ENSMUSG00000037071	Scd1	chr19:44394450-44407709	15.8899	8.06649	13.8987	0.78494	5e-05	0.00141417	-0.978101	5e-05	0.00141417
ENSMUST00000038144	ENSMUSG00000042379	Esm1	chr13:113171607-113225908	18.5559	7.13151	12.9154	0.856808	5e-05	0.00141417	-1.3796	5e-05	0.00141417
ENSMUST00000046383	ENSMUSG00000039304	Tnfsf10	chr3:27317027-27342427	21.4209	10.2971	13.0357	0.340233	0.00215	0.0355551	-1.05678	5e-05	0.00141417
ENSMUST00000044602	ENSMUSG00000057074	Ces1g	chr8:93302368-93337308	7.94713	1.42727	4.53103	1.66658	5e-05	0.00141417	-2.47718	5e-05	0.00141417
ENSMUST00000119475	ENSMUSG00000054690	Emcn	chr3:137341066-137432185	25.6571	16.2053	26.6493	0.717638	5e-05	0.00141417	-0.662896	0.0001	0.00265335
ENSMUST00000023151	ENSMUSG00000022508	Bcl6	chr16:23965051-23988852	13.6447	6.80007	16.7373	1.29944	5e-05	0.00141417	-1.00472	5e-05	0.00141417
ENSMUST00000068031	ENSMUSG00000020914	Top2a	chr11:98992942-99024189	1.38445	0.853277	1.3941	0.708246	0.00015	0.00378624	-0.69823	0.00015	0.00378624
ENSMUST00000002274	ENSMUSG00000002204	Napsa	chr7:44572431-44586862	843.641	383.243	487.82	0.348088	0.0025	0.0401043	-1.13837	5e-05	0.00141417
ENSMUST00000015484	ENSMUSG00000015340	Cybb	chrX:9435251-9487771	2.98363	1.6079	2.29479	0.513183	0.00075	0.0149651	-0.891885	5e-05	0.00141417
ENSMUST00000000299	ENSMUSG00000000290	Itgb2	chr10:77530251-77565686	1.64972	0.683885	1.32321	0.95222	5e-05	0.00141417	-1.2704	5e-05	0.00141417
ENSMUST00000171737	ENSMUSG00000011179	Odc1	chr12:17544872-17551502	356.572	96.959	129.541	0.417962	0.00015	0.00378624	-1.87875	5e-05	0.00141417
ENSMUST00000028045	ENSMUSG00000026712	Mrc1	chr2:14229391-14332057	1.31436	0.889195	1.30083	0.548863	0.00105	0.019753	-0.563788	0.00085	0.0165966
ENSMUST00000085056	ENSMUSG00000066366	Serpina1a	chr12:103853588-103863562	38.3149	26.1009	38.6606	0.566765	5e-05	0.00141417	-0.553804	5e-05	0.00141417
ENSMUST00000110523	ENSMUSG00000058914	C1qtnf3	chr15:10952331-10980150	31.5702	6.4328	13.2875	1.04655	0.00015	0.00378624	-2.29504	5e-05	0.00141417
ENSMUST00000021016	ENSMUSG00000020679	Hnf1b	chr11:83850062-83905819	41.4262	25.267	36.2118	0.519205	0.00035	0.00785859	-0.713289	5e-05	0.00141417
ENSMUST00000102881	ENSMUSG00000020120	Plek	chr11:16971205-17079371	1.01302	0.284572	0.971865	1.77196	5e-05	0.00141417	-1.8318	5e-05	0.00141417
ENSMUST00000078509	ENSMUSG00000024039	Cbs	chr17:31612622-31637199	57.2876	27.8261	43.4232	0.642028	0.00055	0.0115424	-1.04179	5e-05	0.00141417
ENSMUST00000044503	ENSMUSG00000039316	Rftn1	chr17:49992256-50190674	1.18831	0.584594	1.12889	0.949399	0.0014	0.0250158	-1.0234	0.00085	0.0165966
ENSMUST00000035890	ENSMUSG00000041052	Slc7a13	chr4:19818724-19842218	470.818	59.1523	123.59	1.06306	5e-05	0.00141417	-2.99266	5e-05	0.00141417
ENSMUST00000065651	ENSMUSG00000063590	Slc22a28	chr19:8062208-8131982	51.1373	23.258	32.497	0.482581	5e-05	0.00141417	-1.13665	5e-05	0.00141417
ENSMUST00000015368	ENSMUSG00000066097	Cyp2j11	chr4:96294507-96348662	132.524	90.6028	118.177	0.383327	0.0004	0.00878381	-0.548623	5e-05	0.00141417
ENSMUST00000028864	ENSMUSG00000027386	Fbln7	chr2:128862980-128897034	2.43333	1.13735	1.72538	0.601232	0.00135	0.0242813	-1.09725	5e-05	0.00141417
ENSMUST00000023884	ENSMUSG00000023120	Gm853	chr4:130209108-130222401	21.9985	1.03561	2.05348	0.987587	5e-05	0.00141417	-4.40885	5e-05	0.00141417
ENSMUST00000091752	ENSMUSG00000069310	Hist1h3c	chr13:23745012-23745501	9.28808	5.68382	10.2921	0.856612	0.0004	0.00878381	-0.708521	0.0029	0.0449794
ENSMUST00000006912	ENSMUSG00000026737	Pip4k2a	chr2:18842254-18998126	3.45303	2.53873	3.491	0.459538	0.0016	0.0279374	-0.443758	0.0025	0.0401043
ENSMUST00000077190	ENSMUSG00000032564	Cpne4	chr9:104547285-105034544	2.76963	1.71278	2.76598	0.691448	0.00105	0.019753	-0.693351	0.00055	0.0115424
ENSMUST00000022368	ENSMUSG00000021822	Plau	chr14:20836661-20843388	167.737	57.3419	72.5391	0.339168	0.00185	0.031399	-1.54854	5e-05	0.00141417
ENSMUST00000000696	ENSMUSG00000000682	Cd52	chr4:134093535-134095082	11.7604	4.68944	8.42524	0.845303	0.00065	0.0133036	-1.32646	5e-05	0.00141417
ENSMUST00000042042	ENSMUSG00000035699	Slc51a	chr16:32475521-32487879	56.5967	27.34	40.119	0.553272	5e-05	0.00141417	-1.0497	5e-05	0.00141417
ENSMUST00000022853	ENSMUSG00000058914	C1qtnf3	chr15:10952331-10980150	85.547	19.9513	35.6375	0.836915	5e-05	0.00141417	-2.10024	5e-05	0.00141417
ENSMUST00000019992	ENSMUSG00000019846	Lama4	chr10:38965514-39110188	2.01923	0.852141	1.21735	0.51458	0.0019	0.0321013	-1.24464	5e-05	0.00141417
ENSMUST00000167753	ENSMUSG00000090817	Gm4450	chr3:98445674-98457126	69.6441	41.1485	62.004	0.591522	5e-05	0.00141417	-0.759161	5e-05	0.00141417
ENSMUST00000001547	ENSMUSG00000001506	Col1a1	chr11:94936223-94953042	2.73909	1.49502	2.37329	0.666726	5e-05	0.00141417	-0.873537	5e-05	0.00141417
ENSMUST00000015540	ENSMUSG00000015396	Cd83	chr13:43785106-43803130	1.18282	0.524997	0.92926	0.823772	0.0029	0.0449794	-1.17185	5e-05	0.00141417
ENSMUST00000112525	ENSMUSG00000054580	Pla2r1	chr2:60417542-60553308	1.99476	1.47294	2.08522	0.501498	0.00045	0.009687	-0.437515	0.00215	0.0355551
