# Supplementary material for: Altered Expression of Long Noncoding and Messenger RNAs in Diabetic Nephropathy following Treatment with Rosiglitazone
Source: Biomed Res Int. 2020 Jan 12;2020:1360843. doi: 10.1155/2020/1360843 (PMC6983290; doi:10.1155/2020/1360843)
Supplement: Supplementary Materials — Supplementary Table 1: significantly upregulated mRNAs in dbdb mice compared to the control group. Supplementary Table 2: significantly downregulated mRNAs in dbdb mice compared to the control group. Supplementary Table 3: significantly upregulated mRNAs in dbR mice compared to the dbdb group. Supplementary Table 4: significantly downregulated mRNAs in dbR mice compared to the dbdb group. Supplementary Table 5: mRNAs significantly upregulated by diabetic nephropathy yet reversed following rosiglitazone treatment. Supplementary Table 6: mRNAs significantly downregulated by diabetic nephropathy yet reversed following rosiglitazone treatment. Supplementary Table 7: significantly upregulated lncRNAs in dbdb mice compared to the control group. Supplementary Table 8: significantly downregulated lncRNAs in dbdb mice compared to the control group. Supplementary Table 9: significantly upregulated lncRNAs in dbR mice compared to the dbdb group. Supplementary Table 10: significantly downregulated lncRNAs in dbR mice compared to the dbdb group. Supplementary Table 11: lncRNAs significantly upregulated by diabetic nephropathy yet reversed following rosiglitazone treatment. Supplementary Table 12: lncRNAs significantly downregulated by diabetic nephropathy yet reversed following rosiglitazone treatment. Supplementary Table 13: differentially expressed lncRNAs colocated with genes. Supplementary Table 14: differentially expressed lncRNAs coexpressed with genes. Supplementary Table 15: top 20 significantly enriched GO terms associated with differentially expressed mRNAs in the kidneys of dbdb mice compared to the controls. Supplementary Table 16: top 20 significantly enriched GO terms associated with differentially expressed mRNAs in the kidneys of dbR mice compared to the dbdb group. Supplementary Table 17: top 20 significantly enriched GO terms associated with differentially expressed lncRNAs coexpressed with genes in the kidneys of dbdb mice compared to the controls. Supplementa [file 1360843.f1.zip › 1360843.f1/Supplementary Table 7.xls]

## Sheet: Table S7 lncRNA_dbdb_vs_Control
Supplementary Table 7 Significantly up-regulated lncRNAs in dbdb mice compared to the control group
transcript_id	gene_id	gene_name	gene_location	dbdb_FPKM	Control_FPKM	log2(foldchange)	pvalue	qvalue
ENSMUST00000198726.1	ENSMUSG00000106069.1	Gm6135	chr3:133789514-133791504	11.0026	3.64433	1.59412	5e-05	0.00141417
LNC_000298	XLOC_026126	-	chr3:102686984-102705575	1.57527	0.582461	1.43537	0.00155	0.0272269
ENSMUST00000181522.1	ENSMUSG00000097088.1	Gm26615	chr4:133085473-133089146	0.43032	0.202011	1.09098	0.0011	0.020454
ENSMUST00000197200.1	ENSMUSG00000104586.1	4921539H07Rik	chr3:58117052-58167616	2.38043	1.46993	0.695471	0.00045	0.009687
ENSMUST00000188819.6	ENSMUSG00000101581.6	C430002N11Rik	chr9:96765574-96774394	0.465927	0.0760569	2.61495	0.0026	0.0414406
ENSMUST00000129907.2	ENSMUSG00000078706.4	Gm53	chr11:96251104-96264698	5.07495	2.45918	1.04522	0.00015	0.00378624
LNC_000065	XLOC_008229	-	chr12:8521179-8599066	0.990917	0.443061	1.16126	5e-05	0.00141417
ENSMUST00000149940.1	ENSMUSG00000085148.1	Mir22hg	chr11:75461538-75466676	19.9273	12.0317	0.72791	5e-05	0.00141417
LNC_000211	XLOC_017820	-	chr17:43090663-43098547	0.759389	0.226397	1.74598	5e-05	0.00141417
LNC_000244	XLOC_020481	-	chr19:36359224-36363325	1.1465	0.606028	0.919787	5e-05	0.00141417
ENSMUST00000125626.1	ENSMUSG00000051832.7	E230016K23Rik	chr11:83582055-83623693	0.855069	0.257876	1.72937	0.0002	0.00485099
ENSMUST00000181286.1	ENSMUSG00000097804.1	Gm16685	chr3:7569993-7690001	4.89318	1.64375	1.57379	0.00265	0.0420006
LNC_000264	XLOC_022182	-	chr2:86018365-86039901	0.759761	0.455571	0.737869	5e-05	0.00141417
ENSMUST00000180820.7	ENSMUSG00000097320.8	Tmem147os	chr7:30729578-30748437	3.10696	1.92199	0.692904	0.00085	0.0165966
LNC_000297	XLOC_026126	-	chr3:102686984-102705575	1.92176	0.990282	0.956514	0.00055	0.0115424
LNC_000296	XLOC_026112	-	chr3:101667421-101676166	0.720628	0.223603	1.68831	5e-05	0.00141417
LNC_000293	XLOC_025547	-	chr3:56940121-57028002	0.874166	0.391816	1.15773	5e-05	0.00141417
LNC_000215	XLOC_017824	-	chr17:43226297-43233572	0.485821	0.0982835	2.3054	0.00035	0.00785859
ENSMUST00000185409.1	ENSMUSG00000101514.1	Gm5524	chr1:27884045-27902396	2.65076	1.46083	0.859615	5e-05	0.00141417
ENSMUST00000181077.1	ENSMUSG00000097764.1	Gm26635	chr16:17233571-17263430	1.02339	0.435377	1.23302	5e-05	0.00141417
ENSMUST00000199119.1	ENSMUSG00000106547.1	B230303O12Rik	chr5:146188619-146194809	0.711861	0.299651	1.24831	5e-05	0.00141417
LNC_000106	XLOC_010528	-	chr13:54237772-54244199	0.566673	0.173693	1.70598	5e-05	0.00141417
ENSMUST00000180723.7	ENSMUSG00000097073.7	9430037G07Rik	chr9:88595324-88599516	0.716718	0.417404	0.779961	0.0033	0.0499537
LNC_000300	XLOC_026383	-	chr3:131492749-131500993	0.740322	0.406059	0.866465	5e-05	0.00141417
ENSMUST00000182520.1	ENSMUSG00000097971.3	Gm26917	chr17:39845073-39846245	2231.79	819.166	1.44597	5e-05	0.00141417
ENSMUST00000181623.1	ENSMUSG00000097930.1	C330002G04Rik	chr19:23037389-23075853	1.09073	0.490954	1.15163	0.0001	0.00265335
ENSMUST00000181831.2	ENSMUSG00000097281.2	Gm26685	chr1:164503308-164514882	0.716042	0.352067	1.0242	0.0015	0.0264906
LNC_000060	XLOC_007288	-	chr11:68818656-68819974	1.00161	0.414642	1.27238	0.00095	0.0182319
ENSMUST00000182453.1	ENSMUSG00000098041.1	Gm26981	chr7:92729839-92733748	2.55392	1.77375	0.525907	0.0018	0.0306903
LNC_000381	XLOC_038719	-	chr7:125878419-126082411	1.3411	0.476165	1.49388	0.0002	0.00485099
LNC_000461	XLOC_047972	-	chrX:150486074-150514738	1.5453	1.03101	0.583834	5e-05	0.00141417
ENSMUST00000181702.1	ENSMUSG00000097928.1	Gm26578	chr8:32008503-32015759	1.02342	0.632259	0.694809	0.0003	0.00690244
ENSMUST00000196856.1	ENSMUSG00000105985.1	Gm42993	chr5:132015609-132022934	1.32238	0.767555	0.784795	5e-05	0.00141417
LNC_000132	XLOC_012272	-	chr14:19708029-19733194	0.778051	0.47069	0.72509	0.0022	0.0361992
ENSMUST00000143898.1	ENSMUSG00000087333.1	Gm13652	chr2:75124870-75137798	1.49728	0.698132	1.10077	5e-05	0.00141417
ENSMUST00000187290.6	ENSMUSG00000085998.7	AW822252	chrX:53696867-53716772	11.1967	4.97613	1.16998	0.00225	0.0368149
ENSMUST00000192407.1	ENSMUSG00000097845.2	A230020J21Rik	chr1:191005846-191029781	2.97335	1.13376	1.39097	0.00035	0.00785859
LNC_000378	XLOC_038251	-	chr7:84430236-84467543	0.790383	0.260163	1.60314	5e-05	0.00141417
LNC_000379	XLOC_038322	-	chr7:89518798-89532713	0.369054	0.104366	1.82219	5e-05	0.00141417
ENSMUST00000156081.1	ENSMUSG00000086320.1	Gm12840	chr4:117700187-117700923	35.074	18.5086	0.922208	5e-05	0.00141417
ENSMUST00000142871.1	ENSMUSG00000087611.1	4930458D05Rik	chr5:100840796-100899102	1.55791	0.588063	1.40557	0.00185	0.031399
ENSMUST00000180778.1	ENSMUSG00000097819.1	Gm26813	chr1:59488479-59492605	0.411436	0.134399	1.61415	5e-05	0.00141417
ENSMUST00000203933.2	ENSMUSG00000085396.7	Firre	chrX:50537380-50635321	6.29643	4.15842	0.5985	5e-05	0.00141417
ENSMUST00000151038.1	ENSMUSG00000085022.2	Gm5860	chr4:82065872-82067775	0.575552	0.173781	1.72768	0.0008	0.0157593
LNC_000285	XLOC_024474	-	chr2:127445476-127449908	0.728613	0.443632	0.71579	0.0026	0.0414406
LNC_000287	XLOC_024955	-	chr2:167847208-167847882	40.249	7.25774	2.47136	5e-05	0.00141417
ENSMUST00000200021.1	ENSMUSG00000105361.1	Yam1	chr17:39847112-39848035	225.98	97.7161	1.20953	5e-05	0.00141417
LNC_000012	XLOC_002590	-	chr1:127698740-127719450	4.32563	2.87079	0.591461	5e-05	0.00141417
ENSMUST00000150490.2	ENSMUSG00000078706.4	Gm53	chr11:96251104-96264698	2.6592	0.983205	1.43543	5e-05	0.00141417
LNC_000321	XLOC_029938	-	chr4:49059281-49340259	1.16668	0.155718	2.90541	5e-05	0.00141417
LNC_000326	XLOC_030816	-	chr4:138961425-138965656	2.24884	1.46393	0.619329	0.00025	0.00588258
LNC_000391	XLOC_040723	-	chr7:110630162-110635422	0.801163	0.384276	1.05995	5e-05	0.00141417
LNC_000209	XLOC_017101	-	chr16:95188755-95197696	1.40529	0.522525	1.4273	5e-05	0.00141417
ENSMUST00000145581.1	ENSMUSG00000085180.1	AI838599	chr4:3246004-3258092	4.20523	0.807222	2.38115	0.00265	0.0420006
LNC_000018	XLOC_003185	-	chr1:186024058-186047801	0.440969	0.174362	1.33859	5e-05	0.00141417
ENSMUST00000145410.1	ENSMUSG00000085541.1	Gm16010	chr9:96943481-97022043	5.97415	2.49295	1.26088	5e-05	0.00141417
ENSMUST00000193263.1	ENSMUSG00000103143.1	Gm37742	chr2:13036125-13040104	0.625839	0.297628	1.07228	5e-05	0.00141417
ENSMUST00000195512.1	ENSMUSG00000103651.1	Gm37206	chr19:4756570-4765940	4.28429	2.94722	0.5397	0.0018	0.0306903
LNC_000115	XLOC_010942	-	chr13:108563649-108565415	2.1198	1.13708	0.898597	5e-05	0.00141417
ENSMUST00000202081.1	ENSMUSG00000107278.1	Gm42600	chr6:85587530-85702753	1.14559	0.398761	1.5225	0.00075	0.0149651
ENSMUST00000149865.1	ENSMUSG00000085747.1	Slc13a2os	chr11:78394484-78422217	1.78872	0.45633	1.97078	0.0008	0.0157593
ENSMUST00000190169.1	ENSMUSG00000099413.1	Gm17767	chr1:51507085-51512329	3.10223	2.1793	0.509441	0.0014	0.0250158
ENSMUST00000180982.1	ENSMUSG00000097073.7	9430037G07Rik	chr9:88595324-88599516	0.536605	0.195112	1.45956	0.003	0.0461893
LNC_000032	XLOC_004175	-	chr10:122626865-122631130	0.423865	0.119573	1.82572	0.0002	0.00485099
LNC_000398	XLOC_041116	-	chr7:145211555-145228314	0.818278	0.405729	1.01208	0.00275	0.0432258
LNC_000096	XLOC_009256	-	chr12:32748682-32770899	0.923679	0.339991	1.4419	5e-05	0.00141417
ENSMUST00000198804.1	ENSMUSG00000105517.1	Gm42436	chr3:41002433-41006089	0.952001	0.617498	0.624527	0.00285	0.0444141
ENSMUST00000191784.1	ENSMUSG00000103765.1	Gm37857	chr3:93393697-93399442	1.83689	0.474555	1.95262	0.0002	0.00485099
LNC_000269	XLOC_023130	-	chr2:173177596-173183987	0.467284	0.0240126	4.28244	0.00225	0.0368149
ENSMUST00000203549.1	ENSMUSG00000108288.1	RP23-436D14.7	chr6:81985747-81986743	3.29693	1.48471	1.15094	0.00285	0.0444141
LNC_000366	XLOC_036349	-	chr6:82011493-82021159	0.609168	0.234911	1.37473	0.0001	0.00265335
LNC_000039	XLOC_004689	-	chr10:77001735-77030295	1.20654	0.387255	1.63952	5e-05	0.00141417
LNC_000038	XLOC_004689	-	chr10:77001735-77030295	1.72319	0.982889	0.809982	0.0018	0.0306903
ENSMUST00000139014.1	ENSMUSG00000043993.6	2900052L18Rik	chr11:120229801-120231585	2.03561	1.1888	0.775947	0.0007	0.0141397
LNC_000428	XLOC_043062	-	chr8:116181432-116186073	0.915609	0	inf	5e-05	0.00141417
LNC_000429	XLOC_043068	-	chr8:116225356-116271463	1.5598	0.0520801	4.90448	5e-05	0.00141417
ENSMUST00000185789.1	ENSMUSG00000101609.1	Kcnq1ot1	chr7:143106361-143427042	2.49675	1.63724	0.608783	5e-05	0.00141417
LNC_000166	XLOC_014414	-	chr15:52183861-52188694	1.09908	0.548267	1.00334	5e-05	0.00141417
ENSMUST00000195382.1	ENSMUSG00000103313.1	Gm38357	chr3:51224446-51251644	10.3179	1.12381	3.19868	0.0002	0.00485099
LNC_000176	XLOC_014951	-	chr15:103090000-103102111	0.422537	0.143912	1.55389	5e-05	0.00141417
LNC_000174	XLOC_014857	-	chr15:99888131-99901101	0.39781	0.203246	0.968855	0.0026	0.0414406
LNC_000172	XLOC_014739	-	chr15:88875692-88878610	0.77478	0.194327	1.9953	5e-05	0.00141417
ENSMUST00000180387.1	ENSMUSG00000097789.1	Gm2115	chr7:84528974-84578337	0.937787	0.278399	1.75211	5e-05	0.00141417
LNC_000331	XLOC_031759	-	chr5:87509414-87538195	4.00778	1.80363	1.1519	5e-05	0.00141417
LNC_000234	XLOC_019845	-	chr18:38118519-38121212	0.441524	0.0751148	2.55532	0.0006	0.0124324
ENSMUST00000180483.1	ENSMUSG00000097468.1	2310010G23Rik	chrX:36814770-36817185	1.86538	0.697069	1.4201	5e-05	0.00141417
LNC_000128	XLOC_011944	-	chr13:98833959-98838274	0.632207	0.331242	0.932513	0.00035	0.00785859
ENSMUST00000181029.1	ENSMUSG00000066170.6	E230001N04Rik	chr17:28523256-28525347	3.34325	1.13986	1.55239	5e-05	0.00141417
