# Supplementary material for: Altered Expression of Long Noncoding and Messenger RNAs in Diabetic Nephropathy following Treatment with Rosiglitazone
Source: Biomed Res Int. 2020 Jan 12;2020:1360843. doi: 10.1155/2020/1360843 (PMC6983290; doi:10.1155/2020/1360843)
Supplement: Supplementary Materials — Supplementary Table 1: significantly upregulated mRNAs in dbdb mice compared to the control group. Supplementary Table 2: significantly downregulated mRNAs in dbdb mice compared to the control group. Supplementary Table 3: significantly upregulated mRNAs in dbR mice compared to the dbdb group. Supplementary Table 4: significantly downregulated mRNAs in dbR mice compared to the dbdb group. Supplementary Table 5: mRNAs significantly upregulated by diabetic nephropathy yet reversed following rosiglitazone treatment. Supplementary Table 6: mRNAs significantly downregulated by diabetic nephropathy yet reversed following rosiglitazone treatment. Supplementary Table 7: significantly upregulated lncRNAs in dbdb mice compared to the control group. Supplementary Table 8: significantly downregulated lncRNAs in dbdb mice compared to the control group. Supplementary Table 9: significantly upregulated lncRNAs in dbR mice compared to the dbdb group. Supplementary Table 10: significantly downregulated lncRNAs in dbR mice compared to the dbdb group. Supplementary Table 11: lncRNAs significantly upregulated by diabetic nephropathy yet reversed following rosiglitazone treatment. Supplementary Table 12: lncRNAs significantly downregulated by diabetic nephropathy yet reversed following rosiglitazone treatment. Supplementary Table 13: differentially expressed lncRNAs colocated with genes. Supplementary Table 14: differentially expressed lncRNAs coexpressed with genes. Supplementary Table 15: top 20 significantly enriched GO terms associated with differentially expressed mRNAs in the kidneys of dbdb mice compared to the controls. Supplementary Table 16: top 20 significantly enriched GO terms associated with differentially expressed mRNAs in the kidneys of dbR mice compared to the dbdb group. Supplementary Table 17: top 20 significantly enriched GO terms associated with differentially expressed lncRNAs coexpressed with genes in the kidneys of dbdb mice compared to the controls. Supplementa [file 1360843.f1.zip › 1360843.f1/Supplementary Table 8.xls]

## Sheet: Table S8 lncRNA_dbdb_vs_Control
Supplementary Table 8 Significantly down-regulated lncRNAs in dbdb mice compared to the control group
transcript_id	gene_id	gene_name	gene_location	dbdb_FPKM	Control_FPKM	log2(foldchange)	pvalue	qvalue
LNC_000447	XLOC_044713	-	chr9:44664308-44672545	0.972109	3.14597	-1.69432	5e-05	0.00141417
ENSMUST00000144649.1	ENSMUSG00000087616.1	Gm14257	chr2:155593564-155594475	1.52703	3.62579	-1.24756	0.0002	0.00485099
LNC_000059	XLOC_007012	-	chr11:48853695-48855639	0.743299	1.41255	-0.926286	0.00255	0.0407945
LNC_000055	XLOC_006738	-	chr11:15068555-15089097	0.205944	0.767738	-1.89836	0.00165	0.0286638
ENSMUST00000198864.1	ENSMUSG00000104607.1	Gm43202	chr3:116200407-116202713	0.414014	1.98539	-2.26167	0.0023	0.0374907
ENSMUST00000181570.1	ENSMUSG00000097715.1	Gpr137b-ps	chr13:12619083-12650297	3.68667	5.33284	-0.532586	0.0002	0.00485099
LNC_000023	XLOC_003691	-	chr10:70340303-70347510	0.0490366	0.48627	-3.30983	5e-05	0.00141417
ENSMUST00000205326.1	ENSMUSG00000108652.1	RP23-53N23.3	chr7:74818817-74853813	3.44978	5.39996	-0.646444	0.0024	0.0387964
LNC_000153	XLOC_013968	-	chr14:75642258-75671074	0.516795	3.43036	-2.7307	5e-05	0.00141417
ENSMUST00000151188.1	ENSMUSG00000074469.6	Gm15348	chr8:12706943-12719127	0.102204	0.552748	-2.43517	5e-05	0.00141417
LNC_000355	XLOC_034780	-	chr6:72473592-72511752	0.290012	0.86143	-1.57062	0.0008	0.0157593
LNC_000353	XLOC_034486	-	chr6:50535620-50538023	0.270579	0.740079	-1.45163	0.0013	0.0235944
ENSMUST00000201775.1	ENSMUSG00000106874.1	Gm20186	chr6:18844219-18848207	12.5399	35.6036	-1.5055	0.0001	0.00265335
LNC_000182	XLOC_015080	-	chr15:32174585-32182138	0.258985	0.500236	-0.949741	0.00195	0.0327838
LNC_000189	XLOC_016230	-	chr16:65665077-65689018	0.288277	0.706681	-1.2936	5e-05	0.00141417
ENSMUST00000178529.1	ENSMUSG00000095306.2	Gm21807	chr8:68120350-68121527	0.65726	1.50898	-1.19904	0.00235	0.038101
LNC_000248	XLOC_020702	-	chr19:3981654-3986389	0.232022	1.10291	-2.24899	5e-05	0.00141417
LNC_000270	XLOC_023140	-	chr2:174019247-174022284	0	1.07664	#NAME?	5e-05	0.00141417
ENSMUST00000154177.1	ENSMUSG00000084854.1	Gm12678	chr4:44943752-44948330	13.1256	27.7199	-1.07854	5e-05	0.00141417
LNC_000228	XLOC_019625	-	chr18:80534378-80536396	0.991536	1.74419	-0.814822	0.00085	0.0165966
LNC_000226	XLOC_019507	-	chr18:62040938-62146875	0	0.551	#NAME?	5e-05	0.00141417
LNC_000380	XLOC_038701	-	chr7:123031324-123068295	0.695693	1.1856	-0.769097	0.0011	0.020454
LNC_000383	XLOC_039500	-	chr7:25483220-25489508	1.00723	1.98723	-0.980372	5e-05	0.00141417
LNC_000388	XLOC_040440	-	chr7:95544045-95596116	0.166051	0.603344	-1.86135	5e-05	0.00141417
ENSMUST00000185046.1	ENSMUSG00000099146.7	0610031O16Rik	chr3:138210715-138240405	0.121886	0.723875	-2.57021	0.003	0.0461893
LNC_000139	XLOC_013164	-	chr14:123151674-123257847	0	1.69151	#NAME?	5e-05	0.00141417
ENSMUST00000187882.1	ENSMUSG00000099669.1	Gm29012	chr1:105102084-105127366	3.90277	11.4919	-1.55805	0.0015	0.0264906
LNC_000367	XLOC_036564	-	chr6:92215192-92221709	0.427154	1.22468	-1.51958	0.0002	0.00485099
ENSMUST00000180690.1	ENSMUSG00000096917.1	2500002B13Rik	chr8:57488053-57508877	2.2377	4.05606	-0.858064	5e-05	0.00141417
LNC_000274	XLOC_023394	-	chr2:22774093-22878907	0.129743	0.967481	-2.89858	5e-05	0.00141417
LNC_000375	XLOC_038017	-	chr7:61658407-61707623	0.322861	0.632879	-0.971018	0.0001	0.00265335
LNC_000377	XLOC_038130	-	chr7:71137594-71157560	0.487756	0.718461	-0.558751	0.0003	0.00690244
ENSMUST00000189802.1	ENSMUSG00000100426.1	Gm4208	chr1:62821354-62832370	2.46727	8.49118	-1.78305	5e-05	0.00141417
LNC_000048	XLOC_005060	-	chr10:126550736-126605104	0	0.767663	#NAME?	5e-05	0.00141417
ENSMUST00000180638.2	ENSMUSG00000097503.2	3110045C21Rik	chr1:169969408-170110729	3.49027	10.358	-1.56934	5e-05	0.00141417
LNC_000167	XLOC_014453	-	chr15:60781417-60799484	0.374924	0.767918	-1.03435	5e-05	0.00141417
ENSMUST00000146928.1	ENSMUSG00000084923.1	Gm15611	chr5:8998401-8999669	0	1.50144	#NAME?	5e-05	0.00141417
LNC_000324	XLOC_030393	-	chr4:114326599-114337156	0.086999	0.674173	-2.95405	5e-05	0.00141417
LNC_000201	XLOC_016622	-	chr16:20444863-20471092	0.417028	1.4339	-1.78173	5e-05	0.00141417
LNC_000197	XLOC_016494	-	chr16:6009247-6012550	0.0801911	1.16913	-3.86584	0.00315	0.0481278
LNC_000402	XLOC_041242	-	chr8:12749236-12752581	0.208059	1.2544	-2.59194	5e-05	0.00141417
LNC_000401	XLOC_041223	-	chr8:10690028-10692145	1.47265	3.60369	-1.29106	5e-05	0.00141417
ENSMUST00000198676.1	ENSMUSG00000106634.1	Gm43042	chr5:59569701-59574242	6.412	10.9479	-0.771811	5e-05	0.00141417
ENSMUST00000147681.1	ENSMUSG00000078122.4	F630028O10Rik	chrX:96239965-96243636	0.423596	1.25665	-1.56882	5e-05	0.00141417
LNC_000318	XLOC_029595	-	chr4:10939792-10943535	0.0836061	0.563625	-2.75306	0.0005	0.0106375
LNC_000312	XLOC_028885	-	chr4:114326599-114337156	0.0436445	0.438443	-3.32852	0.00295	0.0455823
LNC_000382	XLOC_038894	-	chr7:140187134-140191807	0.0793782	0.374324	-2.23747	0.00035	0.00785859
LNC_000399	XLOC_041157	-	chr8:4809223-4829438	0.183786	0.593355	-1.69087	5e-05	0.00141417
ENSMUST00000181653.1	ENSMUSG00000097724.2	Gm26850	chr3:63933506-63968659	14.621	23.9573	-0.712427	0.0006	0.0124324
LNC_000304	XLOC_026673	-	chr3:16013705-16014705	2.16441	4.2453	-0.971889	0.0003	0.00690244
LNC_000034	XLOC_004326	-	chr10:9976626-10151476	0.107782	0.872632	-3.01726	0.0003	0.00690244
ENSMUST00000176290.1	ENSMUSG00000093535.1	4930533I22Rik	chr6:57476696-57497671	1.10886	2.98206	-1.42724	5e-05	0.00141417
ENSMUST00000180515.1	ENSMUSG00000097254.1	C430042M11Rik	chr17:83851674-83854393	0.165872	0.471618	-1.50755	0.0027	0.0426527
ENSMUST00000134580.1	ENSMUSG00000085582.7	3110099E03Rik	chr2:115493512-115512207	0.418017	0.882686	-1.07834	0.0001	0.00265335
ENSMUST00000184126.2	ENSMUSG00000098332.2	2310009A05Rik	chr9:73039717-73042779	16.3617	25.5862	-0.645043	0.0002	0.00485099
LNC_000223	XLOC_018771	-	chr17:45865164-45867996	0.0527381	0.463391	-3.13531	0.0002	0.00485099
LNC_000205	XLOC_016824	-	chr16:49522249-49644589	0.416441	1.01135	-1.2801	5e-05	0.00141417
ENSMUST00000184605.7	ENSMUSG00000098747.7	Gm27216	chr9:83240480-83254540	3.836	13.4289	-1.80766	5e-05	0.00141417
LNC_000283	XLOC_023892	-	chr2:75810786-75815695	0.20904	0.641585	-1.61786	5e-05	0.00141417
LNC_000080	XLOC_008443	-	chr12:30849442-30855371	0.23199	0.629072	-1.43916	5e-05	0.00141417
ENSMUST00000198175.1	ENSMUSG00000105961.1	Gm42754	chr3:108226786-108240247	0.36734	0.925939	-1.3338	0.00235	0.038101
LNC_000330	XLOC_031229	-	chr5:17275886-17335369	0.378606	0.798024	-1.07574	0.0026	0.0414406
LNC_000002	XLOC_000331	-	chr1:36016774-36021734	0.781411	1.87999	-1.26657	0.0017	0.0293704
LNC_000001	XLOC_000118	-	JH584304.1:38103-41528	0.198289	0.603308	-1.60529	0.0003	0.00690244
ENSMUST00000152784.7	ENSMUSG00000085175.7	Gm11423	chr11:82779600-82781042	4.3799	7.56764	-0.788944	0.0004	0.00878381
ENSMUST00000136438.7	ENSMUSG00000087259.7	2610035D17Rik	chr11:113043894-113173077	0.81006	2.2814	-1.49382	5e-05	0.00141417
ENSMUST00000185122.7	ENSMUSG00000099146.7	0610031O16Rik	chr3:138210715-138240405	0.205509	2.00914	-3.2893	0.00075	0.0149651
LNC_000126	XLOC_011771	-	chr13:71553190-71555425	0	1.93125	#NAME?	5e-05	0.00141417
