# Supplementary material for: Altered Expression of Long Noncoding and Messenger RNAs in Diabetic Nephropathy following Treatment with Rosiglitazone
Source: Biomed Res Int. 2020 Jan 12;2020:1360843. doi: 10.1155/2020/1360843 (PMC6983290; doi:10.1155/2020/1360843)
Supplement: Supplementary Materials — Supplementary Table 1: significantly upregulated mRNAs in dbdb mice compared to the control group. Supplementary Table 2: significantly downregulated mRNAs in dbdb mice compared to the control group. Supplementary Table 3: significantly upregulated mRNAs in dbR mice compared to the dbdb group. Supplementary Table 4: significantly downregulated mRNAs in dbR mice compared to the dbdb group. Supplementary Table 5: mRNAs significantly upregulated by diabetic nephropathy yet reversed following rosiglitazone treatment. Supplementary Table 6: mRNAs significantly downregulated by diabetic nephropathy yet reversed following rosiglitazone treatment. Supplementary Table 7: significantly upregulated lncRNAs in dbdb mice compared to the control group. Supplementary Table 8: significantly downregulated lncRNAs in dbdb mice compared to the control group. Supplementary Table 9: significantly upregulated lncRNAs in dbR mice compared to the dbdb group. Supplementary Table 10: significantly downregulated lncRNAs in dbR mice compared to the dbdb group. Supplementary Table 11: lncRNAs significantly upregulated by diabetic nephropathy yet reversed following rosiglitazone treatment. Supplementary Table 12: lncRNAs significantly downregulated by diabetic nephropathy yet reversed following rosiglitazone treatment. Supplementary Table 13: differentially expressed lncRNAs colocated with genes. Supplementary Table 14: differentially expressed lncRNAs coexpressed with genes. Supplementary Table 15: top 20 significantly enriched GO terms associated with differentially expressed mRNAs in the kidneys of dbdb mice compared to the controls. Supplementary Table 16: top 20 significantly enriched GO terms associated with differentially expressed mRNAs in the kidneys of dbR mice compared to the dbdb group. Supplementary Table 17: top 20 significantly enriched GO terms associated with differentially expressed lncRNAs coexpressed with genes in the kidneys of dbdb mice compared to the controls. Supplementa [file 1360843.f1.zip › 1360843.f1/Supplementary Table 9.xls]

## Sheet: Table S9 lncRNA_dbR_vs_dbdb.DE_
Supplementary Table 9 Significantly up-regulated lncRNAs in dbR mice compared to the dbdb group
transcript_id	gene_id	gene_name	gene_location	dbR_FPKM	dbdb_FPKM	log2(foldchange)	pvalue	qvalue
ENSMUST00000198726.1	ENSMUSG00000106069.1	Gm6135	chr3:133789514-133791504	20.8163	11.0026	0.919861	0.00015	0.00378624
LNC_000189	XLOC_016230	-	chr16:65665077-65689018	0.471575	0.288277	0.710032	5e-05	0.00141417
ENSMUST00000169242.1	ENSMUSG00000091542.1	Gm17167	chr4:42206997-42235313	0.546396	0.341154	0.679525	0.0031	0.0474879
ENSMUST00000156081.1	ENSMUSG00000086320.1	Gm12840	chr4:117700187-117700923	52.0663	35.074	0.56995	5e-05	0.00141417
ENSMUST00000181502.1	ENSMUSG00000097062.1	Gm17586	chr11:120633767-120635125	10.0787	7.03742	0.518189	0.0032	0.0487735
LNC_000167	XLOC_014453	-	chr15:60781417-60799484	0.551389	0.374924	0.556471	0.0011	0.020454
ENSMUST00000200021.1	ENSMUSG00000105361.1	Yam1	chr17:39847112-39848035	384.385	225.98	0.766358	5e-05	0.00141417
LNC_000400	XLOC_041208	-	chr8:8781717-8793611	0.815863	0.419348	0.960181	0.00035	0.00785859
LNC_000225	XLOC_019169	-	chr18:11015420-11019025	0.476197	0.246281	0.951255	0.0029	0.0449794
ENSMUST00000187351.1	ENSMUSG00000099587.1	Gm28967	chr6:125168006-125191701	1175.52	870.492	0.4334	0.0007	0.0141397
LNC_000267	XLOC_023063	-	chr2:166194587-166203054	1.50713	0.994649	0.599543	5e-05	0.00141417
ENSMUST00000181446.7	ENSMUSG00000096972.7	Gm26883	chr2:169633012-170071816	4.93214	2.93979	0.746499	0.0008	0.0157593
ENSMUST00000180863.1	ENSMUSG00000097815.1	Gm26809	chr6:18844219-18848207	24.9241	18.5492	0.426184	0.0004	0.00878381
ENSMUST00000136438.7	ENSMUSG00000087259.7	2610035D17Rik	chr11:113043894-113173077	2.94424	0.81006	1.8618	5e-05	0.00141417
