# Supplementary material for: Altered Expression of Long Noncoding and Messenger RNAs in Diabetic Nephropathy following Treatment with Rosiglitazone
Source: Biomed Res Int. 2020 Jan 12;2020:1360843. doi: 10.1155/2020/1360843 (PMC6983290; doi:10.1155/2020/1360843)
Supplement: Supplementary Materials — Supplementary Table 1: significantly upregulated mRNAs in dbdb mice compared to the control group. Supplementary Table 2: significantly downregulated mRNAs in dbdb mice compared to the control group. Supplementary Table 3: significantly upregulated mRNAs in dbR mice compared to the dbdb group. Supplementary Table 4: significantly downregulated mRNAs in dbR mice compared to the dbdb group. Supplementary Table 5: mRNAs significantly upregulated by diabetic nephropathy yet reversed following rosiglitazone treatment. Supplementary Table 6: mRNAs significantly downregulated by diabetic nephropathy yet reversed following rosiglitazone treatment. Supplementary Table 7: significantly upregulated lncRNAs in dbdb mice compared to the control group. Supplementary Table 8: significantly downregulated lncRNAs in dbdb mice compared to the control group. Supplementary Table 9: significantly upregulated lncRNAs in dbR mice compared to the dbdb group. Supplementary Table 10: significantly downregulated lncRNAs in dbR mice compared to the dbdb group. Supplementary Table 11: lncRNAs significantly upregulated by diabetic nephropathy yet reversed following rosiglitazone treatment. Supplementary Table 12: lncRNAs significantly downregulated by diabetic nephropathy yet reversed following rosiglitazone treatment. Supplementary Table 13: differentially expressed lncRNAs colocated with genes. Supplementary Table 14: differentially expressed lncRNAs coexpressed with genes. Supplementary Table 15: top 20 significantly enriched GO terms associated with differentially expressed mRNAs in the kidneys of dbdb mice compared to the controls. Supplementary Table 16: top 20 significantly enriched GO terms associated with differentially expressed mRNAs in the kidneys of dbR mice compared to the dbdb group. Supplementary Table 17: top 20 significantly enriched GO terms associated with differentially expressed lncRNAs coexpressed with genes in the kidneys of dbdb mice compared to the controls. Supplementa [file 1360843.f1.zip › 1360843.f1/Supplementary Table 10.xls]

## Sheet: Table S10 lncRNA_dbR_vs_dbdb.DE
Supplementary Table 10 Significantly down-regulated lncRNAs in dbR mice compared to the dbdb group
transcript_id	gene_id	gene_name	gene_location	dbR_FPKM	dbdb_FPKM	log2(foldchange)	pvalue	qvalue
ENSMUST00000099676.4	ENSMUSG00000075010.4	AW112010	chr19:11047616-11050566	2.4012	4.49545	-0.904711	0.0006	0.0124324
ENSMUST00000174784.1	ENSMUSG00000092267.1	Gm20417	chr19:5797561-5798549	228.326	294.011	-0.364774	0.001	0.0189868
ENSMUST00000182520.1	ENSMUSG00000097971.3	Gm26917	chr17:39845073-39846245	1296.2	2231.79	-0.783909	5e-05	0.00141417
ENSMUST00000181702.1	ENSMUSG00000097928.1	Gm26578	chr8:32008503-32015759	0.647016	1.02342	-0.661523	0.00075	0.0149651
LNC_000332	XLOC_031796	-	chr5:89245520-89254058	0.132185	0.64967	-2.29715	5e-05	0.00141417
LNC_000333	XLOC_031797	-	chr5:89254448-89265797	0.047806	0.384292	-3.00694	5e-05	0.00141417
ENSMUST00000181620.2	ENSMUSG00000097392.2	D930016D06Rik	chr5:104525734-104554207	3.99126	5.3811	-0.431056	0.00195	0.0327838
LNC_000287	XLOC_024955	-	chr2:167847208-167847882	26.6164	40.249	-0.596638	0.00105	0.019753
LNC_000321	XLOC_029938	-	chr4:49059281-49340259	0.484397	1.16668	-1.26815	5e-05	0.00141417
ENSMUST00000190169.1	ENSMUSG00000099413.1	Gm17767	chr1:51507085-51512329	2.12116	3.10223	-0.548452	0.00075	0.0149651
LNC_000172	XLOC_014739	-	chr15:88875692-88878610	0.452501	0.77478	-0.775868	0.0019	0.0321013
ENSMUST00000198856.1	ENSMUSG00000106334.1	Gm43549	chr3:55578104-55582730	2.99924	5.37757	-0.842357	5e-05	0.00141417
LNC_000331	XLOC_031759	-	chr5:87509414-87538195	2.45056	4.00778	-0.709692	5e-05	0.00141417
