# Supplementary material for: Altered Expression of Long Noncoding and Messenger RNAs in Diabetic Nephropathy following Treatment with Rosiglitazone
Source: Biomed Res Int. 2020 Jan 12;2020:1360843. doi: 10.1155/2020/1360843 (PMC6983290; doi:10.1155/2020/1360843)
Supplement: Supplementary Materials — Supplementary Table 1: significantly upregulated mRNAs in dbdb mice compared to the control group. Supplementary Table 2: significantly downregulated mRNAs in dbdb mice compared to the control group. Supplementary Table 3: significantly upregulated mRNAs in dbR mice compared to the dbdb group. Supplementary Table 4: significantly downregulated mRNAs in dbR mice compared to the dbdb group. Supplementary Table 5: mRNAs significantly upregulated by diabetic nephropathy yet reversed following rosiglitazone treatment. Supplementary Table 6: mRNAs significantly downregulated by diabetic nephropathy yet reversed following rosiglitazone treatment. Supplementary Table 7: significantly upregulated lncRNAs in dbdb mice compared to the control group. Supplementary Table 8: significantly downregulated lncRNAs in dbdb mice compared to the control group. Supplementary Table 9: significantly upregulated lncRNAs in dbR mice compared to the dbdb group. Supplementary Table 10: significantly downregulated lncRNAs in dbR mice compared to the dbdb group. Supplementary Table 11: lncRNAs significantly upregulated by diabetic nephropathy yet reversed following rosiglitazone treatment. Supplementary Table 12: lncRNAs significantly downregulated by diabetic nephropathy yet reversed following rosiglitazone treatment. Supplementary Table 13: differentially expressed lncRNAs colocated with genes. Supplementary Table 14: differentially expressed lncRNAs coexpressed with genes. Supplementary Table 15: top 20 significantly enriched GO terms associated with differentially expressed mRNAs in the kidneys of dbdb mice compared to the controls. Supplementary Table 16: top 20 significantly enriched GO terms associated with differentially expressed mRNAs in the kidneys of dbR mice compared to the dbdb group. Supplementary Table 17: top 20 significantly enriched GO terms associated with differentially expressed lncRNAs coexpressed with genes in the kidneys of dbdb mice compared to the controls. Supplementa [file 1360843.f1.zip › 1360843.f1/Supplementary Table 11.xls]

## Sheet: Sheet1
Supplementary Table 11 lncRNAs significantly up-regulated by diabetic nephropathy yet reversed following rosiglitazone treatment
transcript_id	gene_id	gene_name	gene_location	Control_FPKM	dbdb_FPKM	dbR_FPKM	dbdb vs Control log2(foldchange)	dbdb vs Control pvalue	dbdb vs Control qvalue	dbR vs dbdb log2(foldchange)	dbR vs dbdb pvalue	dbR vs dbdb qvalue
ENSMUST00000182520.1	ENSMUSG00000097971.3	Gm26917	chr17:39845073-39846245	819.166	2231.79	1296.2	-0.783909	5e-05	0.00141417	1.44597	5e-05	0.00141417
ENSMUST00000181702.1	ENSMUSG00000097928.1	Gm26578	chr8:32008503-32015759	0.632259	1.02342	0.647016	-0.661523	0.00075	0.0149651	0.694809	0.0003	0.00690244
LNC_000287	XLOC_024955	-	chr2:167847208-167847882	7.25774	40.249	26.6164	-0.596638	0.00105	0.019753	2.47136	5e-05	0.00141417
LNC_000321	XLOC_029938	-	chr4:49059281-49340259	0.155718	1.16668	0.484397	-1.26815	5e-05	0.00141417	2.90541	5e-05	0.00141417
ENSMUST00000190169.1	ENSMUSG00000099413.1	Gm17767	chr1:51507085-51512329	2.1793	3.10223	2.12116	-0.548452	0.00075	0.0149651	0.509441	0.0014	0.0250158
LNC_000172	XLOC_014739	-	chr15:88875692-88878610	0.194327	0.77478	0.452501	-0.775868	0.0019	0.0321013	1.9953	5e-05	0.00141417
LNC_000331	XLOC_031759	-	chr5:87509414-87538195	1.80363	4.00778	2.45056	-0.709692	5e-05	0.00141417	1.1519	5e-05	0.00141417
