# Supplementary material for: Altered Expression of Long Noncoding and Messenger RNAs in Diabetic Nephropathy following Treatment with Rosiglitazone
Source: Biomed Res Int. 2020 Jan 12;2020:1360843. doi: 10.1155/2020/1360843 (PMC6983290; doi:10.1155/2020/1360843)
Supplement: Supplementary Materials — Supplementary Table 1: significantly upregulated mRNAs in dbdb mice compared to the control group. Supplementary Table 2: significantly downregulated mRNAs in dbdb mice compared to the control group. Supplementary Table 3: significantly upregulated mRNAs in dbR mice compared to the dbdb group. Supplementary Table 4: significantly downregulated mRNAs in dbR mice compared to the dbdb group. Supplementary Table 5: mRNAs significantly upregulated by diabetic nephropathy yet reversed following rosiglitazone treatment. Supplementary Table 6: mRNAs significantly downregulated by diabetic nephropathy yet reversed following rosiglitazone treatment. Supplementary Table 7: significantly upregulated lncRNAs in dbdb mice compared to the control group. Supplementary Table 8: significantly downregulated lncRNAs in dbdb mice compared to the control group. Supplementary Table 9: significantly upregulated lncRNAs in dbR mice compared to the dbdb group. Supplementary Table 10: significantly downregulated lncRNAs in dbR mice compared to the dbdb group. Supplementary Table 11: lncRNAs significantly upregulated by diabetic nephropathy yet reversed following rosiglitazone treatment. Supplementary Table 12: lncRNAs significantly downregulated by diabetic nephropathy yet reversed following rosiglitazone treatment. Supplementary Table 13: differentially expressed lncRNAs colocated with genes. Supplementary Table 14: differentially expressed lncRNAs coexpressed with genes. Supplementary Table 15: top 20 significantly enriched GO terms associated with differentially expressed mRNAs in the kidneys of dbdb mice compared to the controls. Supplementary Table 16: top 20 significantly enriched GO terms associated with differentially expressed mRNAs in the kidneys of dbR mice compared to the dbdb group. Supplementary Table 17: top 20 significantly enriched GO terms associated with differentially expressed lncRNAs coexpressed with genes in the kidneys of dbdb mice compared to the controls. Supplementa [file 1360843.f1.zip › 1360843.f1/Supplementary Table 12.xls]

## Sheet: Sheet1
Supplementary Table 12 LncRNAs significantly down-regulated by diabetic nephropathy yet reversed following rosiglitazone treatment
transcript_id	gene_id	gene_name	gene_location	Control_FPKM	dbdb_FPKM	dbR_FPKM	dbdb vs Control log2(foldchange)	dbdb vs Control pvalue	dbdb vs Control qvalue	dbR vs dbdb log2(foldchange)	dbR vs dbdb pvalue	dbR vs dbdb qvalue
LNC_000189	XLOC_016230	-	chr16:65665077-65689018	0.706681	0.288277	0.471575	0.710032	5e-05	0.00141417	-1.2936	5e-05	0.00141417
LNC_000167	XLOC_014453	-	chr15:60781417-60799484	0.767918	0.374924	0.551389	0.556471	0.0011	0.020454	-1.03435	5e-05	0.00141417
ENSMUST00000136438.7	ENSMUSG00000087259.7	2610035D17Rik	chr11:113043894-113173077	2.2814	0.81006	2.94424	1.8618	5e-05	0.00141417	-1.49382	5e-05	0.00141417
