# Supplementary material for: Altered Expression of Long Noncoding and Messenger RNAs in Diabetic Nephropathy following Treatment with Rosiglitazone
Source: Biomed Res Int. 2020 Jan 12;2020:1360843. doi: 10.1155/2020/1360843 (PMC6983290; doi:10.1155/2020/1360843)
Supplement: Supplementary Materials — Supplementary Table 1: significantly upregulated mRNAs in dbdb mice compared to the control group. Supplementary Table 2: significantly downregulated mRNAs in dbdb mice compared to the control group. Supplementary Table 3: significantly upregulated mRNAs in dbR mice compared to the dbdb group. Supplementary Table 4: significantly downregulated mRNAs in dbR mice compared to the dbdb group. Supplementary Table 5: mRNAs significantly upregulated by diabetic nephropathy yet reversed following rosiglitazone treatment. Supplementary Table 6: mRNAs significantly downregulated by diabetic nephropathy yet reversed following rosiglitazone treatment. Supplementary Table 7: significantly upregulated lncRNAs in dbdb mice compared to the control group. Supplementary Table 8: significantly downregulated lncRNAs in dbdb mice compared to the control group. Supplementary Table 9: significantly upregulated lncRNAs in dbR mice compared to the dbdb group. Supplementary Table 10: significantly downregulated lncRNAs in dbR mice compared to the dbdb group. Supplementary Table 11: lncRNAs significantly upregulated by diabetic nephropathy yet reversed following rosiglitazone treatment. Supplementary Table 12: lncRNAs significantly downregulated by diabetic nephropathy yet reversed following rosiglitazone treatment. Supplementary Table 13: differentially expressed lncRNAs colocated with genes. Supplementary Table 14: differentially expressed lncRNAs coexpressed with genes. Supplementary Table 15: top 20 significantly enriched GO terms associated with differentially expressed mRNAs in the kidneys of dbdb mice compared to the controls. Supplementary Table 16: top 20 significantly enriched GO terms associated with differentially expressed mRNAs in the kidneys of dbR mice compared to the dbdb group. Supplementary Table 17: top 20 significantly enriched GO terms associated with differentially expressed lncRNAs coexpressed with genes in the kidneys of dbdb mice compared to the controls. Supplementa [file 1360843.f1.zip › 1360843.f1/Supplementary Table 13.xls]

## Sheet: Sheet1
Supplementary Table 13 Differentially expressed lncRNAs co-located with genes
lncRNA_Gene_ID	lncRNA_Gene_Symbol	lncRNA_Status	lncRNA_Start	lncRNA_End	lncRNA_Strand	mRNA_ID	mRNA_Gene_Id	mRNA_Gene_Symbol	mRNA_Gene_Description	mRNA_Start	mRNA_End	mRNA_Strand	Distance	Location
ENSMUSG00000085180.1	AI838599	Annotated_lncRNA	3247356	3252870	+	ENSMUST00000105159	ENSMUSG00000095982	Vmn1r3	Vomeronasal receptor, type 1||GPCR, rhodopsin-like, 7TM	3184382	3185305	-	62050	upstream
ENSMUSG00000085180.1	AI838599	Annotated_lncRNA	3247356	3252870	+	ENSMUST00000105160	ENSMUSG00000094798	Vmn1r2	Vomeronasal receptor, type 1||GPCR, rhodopsin-like, 7TM	3172083	3173006	+	74349	downstream
XLOC_017824	--	Novel_lncRNA	43226346	43233572	+	ENSMUST00000047399	ENSMUSG00000041293	Adgrf1	SEA domain||GPS motif||GPCR family 2, Ig-hepta-like receptor||GPCR, family 2-like||GPCR, family 2, secretin-like	43270329	43324737	+	36756	upstream
XLOC_017820	--	Novel_lncRNA	43090664	43098547	+	ENSMUST00000024708	ENSMUSG00000023915	Tnfrsf21	Death-like domain||Tumour necrosis factor receptor 21||Death domain||TNFR/NGFR cysteine-rich region	43016555	43089188	+	1475	downstream
XLOC_010528	--	Novel_lncRNA	54237773	54244199	+	ENSMUST00000038101	ENSMUSG00000034987	Hrh2	GPCR, rhodopsin-like, 7TM||G protein-coupled receptor, rhodopsin-like||Histamine H2 receptor	54192129	54222432	+	15340	downstream
ENSMUSG00000098747.7	Gm27216	Annotated_lncRNA	83240481	83254022	-	ENSMUST00000187193	ENSMUSG00000066456	Hmgn3	High mobility group protein HMGN	83109948	83146470	-	94010	upstream
ENSMUSG00000098747.7	Gm27216	Annotated_lncRNA	83240481	83254022	-	ENSMUST00000161796	ENSMUSG00000066456	Hmgn3	High mobility group protein HMGN	83109948	83146605	-	93875	upstream
ENSMUSG00000098747.7	Gm27216	Annotated_lncRNA	83240481	83254022	-	ENSMUST00000162246	ENSMUSG00000066456	Hmgn3	High mobility group protein HMGN	83109948	83146685	-	93795	upstream
ENSMUSG00000098747.7	Gm27216	Annotated_lncRNA	83240481	83254022	-	ENSMUST00000185315	ENSMUSG00000066456	Hmgn3	High mobility group protein HMGN	83109948	83146530	-	93950	upstream
ENSMUSG00000097073.7	9430037G07Rik	Annotated_lncRNA	88596801	88599516	-	ENSMUST00000113110	ENSMUSG00000079427	Mthfsl	5-formyltetrahydrofolate cyclo-ligase	88688602	88719813	-	89085	downstream
ENSMUSG00000097073.7	9430037G07Rik	Annotated_lncRNA	88596801	88599516	-	ENSMUST00000162827	ENSMUSG00000032425	Zfp949	Zinc finger, C2H2||-||Zinc finger, C2H2-like||Krueppel-associated box	88548020	88571061	+	25739	downstream
ENSMUSG00000097073.7	9430037G07Rik	Annotated_lncRNA	88596801	88599516	-	ENSMUST00000161232	ENSMUSG00000032425	Zfp949	Zinc finger, C2H2||-||Zinc finger, C2H2-like||Krueppel-associated box	88548100	88554539	+	42261	downstream
ENSMUSG00000097073.7	9430037G07Rik	Annotated_lncRNA	88596801	88599516	-	ENSMUST00000160652	ENSMUSG00000032425	Zfp949	Zinc finger, C2H2||-||Zinc finger, C2H2-like||Krueppel-associated box	88548044	88567286	+	29514	downstream
ENSMUSG00000097073.7	9430037G07Rik	Annotated_lncRNA	88596801	88599516	-	ENSMUST00000164661	ENSMUSG00000090693	Trim43a	Zinc finger, RING-type, conserved site||Concanavalin A-like lectin/glucanase domain||Zinc finger, C3HC4 RING-type||B-box-type zinc finger||B30.2/SPRY domain||Zinc finger, RING-type||SPRY domain||Butyrophylin-like	88580891	88588819	+	7981	downstream
ENSMUSG00000097073.7	9430037G07Rik	Annotated_lncRNA	88596801	88599516	-	ENSMUST00000161458	ENSMUSG00000032425	Zfp949	Zinc finger, C2H2||-||Zinc finger, C2H2-like||Krueppel-associated box	88548183	88571061	+	25739	downstream
ENSMUSG00000103313.1	Gm38357	Annotated_lncRNA	51231917	51234380	+	ENSMUST00000163748	ENSMUSG00000037174	Elf2	Ets domain||Transcription factor Elf, N-terminal	51255685	51325987	-	21304	downstream
ENSMUSG00000103313.1	Gm38357	Annotated_lncRNA	51231917	51234380	+	ENSMUST00000193018	ENSMUSG00000023087	Noct	-||Endonuclease/exonuclease/phosphatase	51243408	51249786	+	9027	upstream
ENSMUSG00000103313.1	Gm38357	Annotated_lncRNA	51231917	51234380	+	ENSMUST00000167780	ENSMUSG00000023087	Noct	-||Endonuclease/exonuclease/phosphatase	51224470	51251631	+	-2464	sense_overlapping
ENSMUSG00000103313.1	Gm38357	Annotated_lncRNA	51231917	51234380	+	ENSMUST00000194641	ENSMUSG00000037174	Elf2	Ets domain||Transcription factor Elf, N-terminal	51252720	51340663	-	18339	downstream
ENSMUSG00000103313.1	Gm38357	Annotated_lncRNA	51231917	51234380	+	ENSMUST00000144826	ENSMUSG00000023087	Noct	-||Endonuclease/exonuclease/phosphatase	51240206	51251624	+	5825	upstream
ENSMUSG00000103313.1	Gm38357	Annotated_lncRNA	51231917	51234380	+	ENSMUST00000062009	ENSMUSG00000037174	Elf2	Ets domain||Transcription factor Elf, N-terminal	51255231	51340644	-	20850	downstream
ENSMUSG00000103313.1	Gm38357	Annotated_lncRNA	51231917	51234380	+	ENSMUST00000091144	ENSMUSG00000037174	Elf2	Ets domain||Transcription factor Elf, N-terminal	51255663	51277415	-	21282	downstream
ENSMUSG00000103313.1	Gm38357	Annotated_lncRNA	51231917	51234380	+	ENSMUST00000023849	ENSMUSG00000023087	Noct	-||Endonuclease/exonuclease/phosphatase	51224447	51251644	+	-2464	sense_overlapping
ENSMUSG00000103313.1	Gm38357	Annotated_lncRNA	51231917	51234380	+	ENSMUST00000195432	ENSMUSG00000037174	Elf2	Ets domain||Transcription factor Elf, N-terminal	51264870	51277368	-	30489	downstream
ENSMUSG00000103313.1	Gm38357	Annotated_lncRNA	51231917	51234380	+	ENSMUST00000108053	ENSMUSG00000037174	Elf2	Ets domain||Transcription factor Elf, N-terminal	51255665	51277575	-	21284	downstream
ENSMUSG00000103313.1	Gm38357	Annotated_lncRNA	51231917	51234380	+	ENSMUST00000156983	ENSMUSG00000037174	Elf2	Ets domain||Transcription factor Elf, N-terminal	51265050	51277444	-	30669	downstream
ENSMUSG00000103313.1	Gm38357	Annotated_lncRNA	51231917	51234380	+	ENSMUST00000108051	ENSMUSG00000037174	Elf2	Ets domain||Transcription factor Elf, N-terminal	51255665	51277514	-	21284	downstream
ENSMUSG00000103651.1	Gm37206	Annotated_lncRNA	4762103	4765171	-	ENSMUST00000088653	ENSMUSG00000067872	Ccdc87	Microtubule-associated protein, MAP65/Ase1/PRC1	4839366	4842528	+	74194	upstream
ENSMUSG00000103651.1	Gm37206	Annotated_lncRNA	4762103	4765171	-	ENSMUST00000006625	ENSMUSG00000006456	Rbm14	RNA recognition motif domain	4800569	4811634	-	35397	downstream
ENSMUSG00000103651.1	Gm37206	Annotated_lncRNA	4762103	4765171	-	ENSMUST00000179909	ENSMUSG00000096370	Gm21992	Zinc finger, CCHC-type||RNA recognition motif domain||-	4785152	4811508	-	19980	downstream
ENSMUSG00000103651.1	Gm37206	Annotated_lncRNA	4762103	4765171	-	ENSMUST00000096325	ENSMUSG00000071691	Gm960	Protein of unknown function DUF4554	4648317	4698315	-	63787	upstream
ENSMUSG00000103651.1	Gm37206	Annotated_lncRNA	4762103	4765171	-	ENSMUST00000164209	ENSMUSG00000094936	Rbm4	RNA recognition motif domain||Zinc finger, CCHC-type	4785275	4793900	-	20103	downstream
ENSMUSG00000103651.1	Gm37206	Annotated_lncRNA	4762103	4765171	-	ENSMUST00000006626	ENSMUSG00000006457	Actn3	Spectrin/alpha-actinin||Actinin-type actin-binding domain, conserved site||Spectrin repeat||EF-hand domain||Calponin homology domain||EF-hand, Ca insensitive	4861223	4877909	-	96051	downstream
ENSMUSG00000103651.1	Gm37206	Annotated_lncRNA	4762103	4765171	-	ENSMUST00000172000	ENSMUSG00000096370	Gm21992	Zinc finger, CCHC-type||RNA recognition motif domain||-	4787369	4811508	-	22197	downstream
ENSMUSG00000103651.1	Gm37206	Annotated_lncRNA	4762103	4765171	-	ENSMUST00000180248	ENSMUSG00000094936	Rbm4	RNA recognition motif domain||Zinc finger, CCHC-type	4784293	4793901	-	19121	downstream
ENSMUSG00000103651.1	Gm37206	Annotated_lncRNA	4762103	4765171	-	ENSMUST00000178615	ENSMUSG00000094936	Rbm4	RNA recognition motif domain||Zinc finger, CCHC-type	4785153	4793851	-	19981	downstream
ENSMUSG00000103651.1	Gm37206	Annotated_lncRNA	4762103	4765171	-	ENSMUST00000036744	ENSMUSG00000033760	Rbm4b	Zinc finger, CCHC-type||RNA recognition motif domain	4756571	4765940	+	-3069	antisense
ENSMUSG00000103651.1	Gm37206	Annotated_lncRNA	4762103	4765171	-	ENSMUST00000177696	ENSMUSG00000071691	Gm960	Protein of unknown function DUF4554	4625841	4698668	-	63434	upstream
ENSMUSG00000103651.1	Gm37206	Annotated_lncRNA	4762103	4765171	-	ENSMUST00000113793	ENSMUSG00000006456	Rbm14	RNA recognition motif domain	4800922	4811585	-	35750	downstream
ENSMUSG00000103651.1	Gm37206	Annotated_lncRNA	4762103	4765171	-	ENSMUST00000180008	ENSMUSG00000006456	Rbm14	RNA recognition motif domain	4801777	4811512	-	36605	downstream
ENSMUSG00000103651.1	Gm37206	Annotated_lncRNA	4762103	4765171	-	ENSMUST00000037246	ENSMUSG00000034108	Ccs	Heavy metal-associated domain, HMA||Superoxide dismutase, copper/zinc binding domain||Superoxide dismutase, copper/zinc, binding site	4825366	4839322	-	60194	downstream
ENSMUSG00000103651.1	Gm37206	Annotated_lncRNA	4762103	4765171	-	ENSMUST00000008991	ENSMUSG00000067889	Sptbn2	Calponin homology domain||Spectrin, beta subunit||Pleckstrin homology domain, spectrin-type||Spectrin repeat||Pleckstrin homology domain||Spectrin/alpha-actinin||Actinin-type actin-binding domain, conserved site	4711208	4752353	+	9749	downstream
ENSMUSG00000103651.1	Gm37206	Annotated_lncRNA	4762103	4765171	-	ENSMUST00000179189	ENSMUSG00000094936	Rbm4	RNA recognition motif domain||Zinc finger, CCHC-type	4787773	4793860	-	22601	downstream
ENSMUSG00000103651.1	Gm37206	Annotated_lncRNA	4762103	4765171	-	ENSMUST00000119694	ENSMUSG00000083282	Ctsf	Cysteine peptidase, cysteine active site||Cathepsin propeptide inhibitor domain (I29)||Cysteine peptidase, histidine active site||Peptidase C1A, papain C-terminal	4855129	4860912	+	89957	upstream
ENSMUSG00000103651.1	Gm37206	Annotated_lncRNA	4762103	4765171	-	ENSMUST00000178404	ENSMUSG00000096370	Gm21992	Zinc finger, CCHC-type||RNA recognition motif domain||-	4785153	4811212	-	19981	downstream
ENSMUSG00000103651.1	Gm37206	Annotated_lncRNA	4762103	4765171	-	ENSMUST00000164376	ENSMUSG00000094936	Rbm4	RNA recognition motif domain||Zinc finger, CCHC-type	4787937	4793880	-	22765	downstream
ENSMUSG00000051832.7	E230016K23Rik	Annotated_lncRNA	83582056	83623693	+	ENSMUST00000001008	ENSMUSG00000000982	Ccl3	Chemokine interleukin-8-like domain||CC chemokine, conserved site	83647844	83649355	-	24150	downstream
ENSMUSG00000051832.7	E230016K23Rik	Annotated_lncRNA	83582056	83623693	+	ENSMUST00000001009	ENSMUSG00000000983	Wfdc18	WAP-type 'four-disulfide core' domain	83709015	83711348	+	85321	upstream
ENSMUSG00000051832.7	E230016K23Rik	Annotated_lncRNA	83582056	83623693	+	ENSMUST00000019069	ENSMUSG00000018925	Heatr9	Armadillo-type fold	83511736	83522175	-	59880	upstream
ENSMUSG00000051832.7	E230016K23Rik	Annotated_lncRNA	83582056	83623693	+	ENSMUST00000019071	ENSMUSG00000018927	Ccl6	CC chemokine, conserved site||Chemokine interleukin-8-like domain	83587882	83593087	-	-5206	antisense
ENSMUSG00000051832.7	E230016K23Rik	Annotated_lncRNA	83582056	83623693	+	ENSMUST00000133170	ENSMUSG00000020680	Taf15	Zinc finger, RanBP2-type||RNA recognition motif domain	83489027	83506743	+	75312	downstream
ENSMUSG00000051832.7	E230016K23Rik	Annotated_lncRNA	83582056	83623693	+	ENSMUST00000019266	ENSMUSG00000019122	Ccl9	CC chemokine, conserved site||Chemokine interleukin-8-like domain	83572919	83578636	-	3419	upstream
ENSMUSG00000051832.7	E230016K23Rik	Annotated_lncRNA	83582056	83623693	+	ENSMUST00000019074	ENSMUSG00000018930	Ccl4	CC chemokine, conserved site||Chemokine interleukin-8-like domain	83662584	83664683	+	38890	upstream
ENSMUSG00000051832.7	E230016K23Rik	Annotated_lncRNA	83582056	83623693	+	ENSMUST00000092836	ENSMUSG00000069792	Wfdc17	WAP-type 'four-disulfide core' domain	83703991	83706268	+	80297	upstream
ENSMUSG00000051832.7	E230016K23Rik	Annotated_lncRNA	83582056	83623693	+	ENSMUST00000182502	ENSMUSG00000081906	Rpl9-ps1	Ribosomal protein L6, alpha-beta domain||Ribosomal protein L6	83645046	83645621	-	21352	downstream
ENSMUSG00000051832.7	E230016K23Rik	Annotated_lncRNA	83582056	83623693	+	ENSMUST00000021018	ENSMUSG00000020680	Taf15	Zinc finger, RanBP2-type||RNA recognition motif domain	83473092	83506743	+	75312	downstream
ENSMUSG00000051832.7	E230016K23Rik	Annotated_lncRNA	83582056	83623693	+	ENSMUST00000035938	ENSMUSG00000035042	Ccl5	Chemokine interleukin-8-like domain||CC chemokine, conserved site	83525778	83530518	-	51537	upstream
ENSMUSG00000097804.1	Gm16685	Annotated_lncRNA	7612705	7690001	+	ENSMUST00000168269	ENSMUSG00000040329	Il7	Interleukin-7||Interleukin-7/Interleukin-9, conserved site||Interleukin-7/interleukin-9 family	7572028	7605864	-	6840	upstream
ENSMUSG00000097804.1	Gm16685	Annotated_lncRNA	7612705	7690001	+	ENSMUST00000194184	ENSMUSG00000040329	Il7	Interleukin-7||Interleukin-7/Interleukin-9, conserved site||Interleukin-7/interleukin-9 family	7573127	7612893	-	-189	antisense
ENSMUSG00000097804.1	Gm16685	Annotated_lncRNA	7612705	7690001	+	ENSMUST00000192202	ENSMUSG00000040329	Il7	Interleukin-7||Interleukin-7/Interleukin-9, conserved site||Interleukin-7/interleukin-9 family	7573182	7613760	-	-1056	antisense
ENSMUSG00000097804.1	Gm16685	Annotated_lncRNA	7612705	7690001	+	ENSMUST00000193010	ENSMUSG00000043542	Zc2hc1a	-	7503486	7552075	+	60629	downstream
ENSMUSG00000097804.1	Gm16685	Annotated_lncRNA	7612705	7690001	+	ENSMUST00000051064	ENSMUSG00000043542	Zc2hc1a	-	7503483	7553836	+	58868	downstream
ENSMUSG00000097804.1	Gm16685	Annotated_lncRNA	7612705	7690001	+	ENSMUST00000194279	ENSMUSG00000040329	Il7	Interleukin-7||Interleukin-7/Interleukin-9, conserved site||Interleukin-7/interleukin-9 family	7569994	7613727	-	-1023	antisense
XLOC_036564	--	Novel_lncRNA	92215193	92221709	-	ENSMUST00000138041	ENSMUSG00000014550	Rbsn	Rabenosyn, Rab binding domain||Zinc finger, FYVE/PHD-type||FYVE zinc finger||Zinc finger, C2H2||-||Zinc finger, FYVE-related	92211596	92214569	-	623	upstream
XLOC_036564	--	Novel_lncRNA	92215193	92221709	-	ENSMUST00000203516	ENSMUSG00000014550	Rbsn	Rabenosyn, Rab binding domain||Zinc finger, FYVE/PHD-type||FYVE zinc finger||Zinc finger, C2H2||-||Zinc finger, FYVE-related	92207153	92214849	-	343	upstream
XLOC_036564	--	Novel_lncRNA	92215193	92221709	-	ENSMUST00000014694	ENSMUSG00000014550	Rbsn	Rabenosyn, Rab binding domain||Zinc finger, FYVE/PHD-type||FYVE zinc finger||Zinc finger, C2H2||-||Zinc finger, FYVE-related	92186712	92214925	-	267	upstream
XLOC_036564	--	Novel_lncRNA	92215193	92221709	-	ENSMUST00000113463	ENSMUSG00000005893	Nr2c2	Nuclear hormone receptor, ligand-binding domain||-||Zinc finger, nuclear hormone receptor-type||Nuclear hormone receptor	92092433	92167705	+	47487	downstream
XLOC_036564	--	Novel_lncRNA	92215193	92221709	-	ENSMUST00000113460	ENSMUSG00000005893	Nr2c2	Nuclear hormone receptor, ligand-binding domain||-||Zinc finger, nuclear hormone receptor-type||Nuclear hormone receptor	92091390	92173057	+	42135	downstream
XLOC_036564	--	Novel_lncRNA	92215193	92221709	-	ENSMUST00000133133	ENSMUSG00000005893	Nr2c2	Nuclear hormone receptor, ligand-binding domain||-||Zinc finger, nuclear hormone receptor-type||Nuclear hormone receptor	92138015	92139832	+	75360	downstream
XLOC_036564	--	Novel_lncRNA	92215193	92221709	-	ENSMUST00000006046	ENSMUSG00000005892	Trh	Thyrotropin-releasing hormone	92242061	92244650	-	20351	downstream
XLOC_036564	--	Novel_lncRNA	92215193	92221709	-	ENSMUST00000140438	ENSMUSG00000014551	Mrps25	Ribosomal protein/NADH dehydrogenase domain||Thioredoxin-like fold	92169525	92184033	-	31159	upstream
XLOC_036564	--	Novel_lncRNA	92215193	92221709	-	ENSMUST00000124635	ENSMUSG00000014550	Rbsn	Rabenosyn, Rab binding domain||Zinc finger, FYVE/PHD-type||FYVE zinc finger||Zinc finger, C2H2||-||Zinc finger, FYVE-related	92189841	92199725	-	15467	upstream
XLOC_036349	--	Novel_lncRNA	82011494	82021159	-	ENSMUST00000032124	ENSMUSG00000030045	Mrpl19	Translation protein SH3-like domain||Ribosomal protein L19	81957851	81965958	-	45535	upstream
XLOC_036349	--	Novel_lncRNA	82011494	82021159	-	ENSMUST00000150976	ENSMUSG00000035104	Eva1a	-	82041043	82091895	+	19883	upstream
XLOC_036349	--	Novel_lncRNA	82011494	82021159	-	ENSMUST00000042974	ENSMUSG00000035104	Eva1a	-	82041623	82093099	+	20463	upstream
XLOC_036349	--	Novel_lncRNA	82011494	82021159	-	ENSMUST00000203959	ENSMUSG00000035125	Gcfc2	-||GC-rich sequence DNA-binding factor domain	81946503	81958062	+	53431	downstream
XLOC_036349	--	Novel_lncRNA	82011494	82021159	-	ENSMUST00000043195	ENSMUSG00000035125	Gcfc2	-||GC-rich sequence DNA-binding factor domain	81923669	81959915	+	51578	downstream
XLOC_036349	--	Novel_lncRNA	82011494	82021159	-	ENSMUST00000149023	ENSMUSG00000035104	Eva1a	-	82052307	82092160	+	31147	upstream
ENSMUSG00000107278.1	Gm42600	Annotated_lncRNA	85679277	85682864	+	ENSMUST00000050780	ENSMUSG00000051262	Cml3	GNAT domain||Acyl-CoA N-acyltransferase	85760649	85765744	-	77784	downstream
ENSMUSG00000107278.1	Gm42600	Annotated_lncRNA	85679277	85682864	+	ENSMUST00000072018	ENSMUSG00000063810	Alms1	ALMS motif	85587531	85702753	+	-3588	sense_overlapping
ENSMUSG00000107278.1	Gm42600	Annotated_lncRNA	85679277	85682864	+	ENSMUST00000179613	ENSMUSG00000089694	Gm4477	GNAT domain||Acyl-CoA N-acyltransferase	85707173	85707858	-	24308	downstream
ENSMUSG00000107278.1	Gm42600	Annotated_lncRNA	85679277	85682864	+	ENSMUST00000160534	ENSMUSG00000089694	Gm4477	GNAT domain||Acyl-CoA N-acyltransferase	85706727	85713205	-	23862	downstream
ENSMUSG00000107278.1	Gm42600	Annotated_lncRNA	85679277	85682864	+	ENSMUST00000168531	ENSMUSG00000051262	Cml3	GNAT domain||Acyl-CoA N-acyltransferase	85760679	85762480	-	77814	downstream
XLOC_023130	--	Novel_lncRNA	173178269	173183987	+	ENSMUST00000029018	ENSMUSG00000027514	Zbp1	RHIM domain||Double-stranded RNA-specific adenosine deaminase (DRADA)	173206612	173218923	-	22624	downstream
XLOC_023130	--	Novel_lncRNA	173178269	173183987	+	ENSMUST00000109116	ENSMUSG00000027514	Zbp1	RHIM domain||Double-stranded RNA-specific adenosine deaminase (DRADA)	173213735	173218910	-	29747	downstream
XLOC_023130	--	Novel_lncRNA	173178269	173183987	+	ENSMUST00000139306	ENSMUSG00000038400	Pmepa1	-	173228046	173276189	-	44058	downstream
XLOC_023130	--	Novel_lncRNA	173178269	173183987	+	ENSMUST00000029017	ENSMUSG00000027513	Pck1	Phosphoenolpyruvate carboxykinase, GTP-utilising, conserved site||Phosphoenolpyruvate carboxykinase, N-terminal||Phosphoenolpyruvate carboxykinase, GTP-utilising	173153048	173159273	+	18995	downstream
XLOC_023130	--	Novel_lncRNA	173178269	173183987	+	ENSMUST00000179693	ENSMUSG00000070495	Ctcfl	Zinc finger, C2H2||Zinc finger, C2H2-like	173093609	173119525	-	58743	upstream
XLOC_023130	--	Novel_lncRNA	173178269	173183987	+	ENSMUST00000094287	ENSMUSG00000070495	Ctcfl	Zinc finger, C2H2||Zinc finger, C2H2-like	173093609	173119525	-	58743	upstream
XLOC_023130	--	Novel_lncRNA	173178269	173183987	+	ENSMUST00000036248	ENSMUSG00000038400	Pmepa1	-	173224458	173276533	-	40470	downstream
XLOC_014951	--	Novel_lncRNA	103090001	103096286	+	ENSMUST00000001703	ENSMUSG00000001657	Hoxc8	Homeobox, conserved site||Homeobox protein, antennapedia type, conserved site||Homeodomain, metazoa||Homeodomain-like||Homeobox domain||Helix-turn-helix motif	102990607	102993821	+	96179	downstream
XLOC_014951	--	Novel_lncRNA	103090001	103096286	+	ENSMUST00000118152	ENSMUSG00000009575	Cbx5	Chromo domain-like||Chromo shadow domain||Chromo domain subgroup||Chromo/chromo shadow domain||Chromo domain, conserved site||Chromo domain	103191544	103239816	-	95257	downstream
XLOC_014951	--	Novel_lncRNA	103090001	103096286	+	ENSMUST00000001709	ENSMUSG00000022485	Hoxc5	Homeobox, conserved site||Homeobox protein, antennapedia type||Homeodomain, metazoa||Homeobox domain||Homeodomain-like||Homeobox protein, antennapedia type, conserved site	103013815	103017429	+	72571	downstream
XLOC_014951	--	Novel_lncRNA	103090001	103096286	+	ENSMUST00000064067	ENSMUSG00000036061	Smug1	Uracil-DNA glycosylase-like	103153307	103158002	-	57020	downstream
XLOC_014951	--	Novel_lncRNA	103090001	103096286	+	ENSMUST00000001711	ENSMUSG00000001661	Hoxc6	Homeodomain, metazoa||Homeobox domain||Homeodomain-like||Homeobox protein, antennapedia type, conserved site||Homeobox, conserved site	103009573	103011881	+	78119	downstream
XLOC_014951	--	Novel_lncRNA	103090001	103096286	+	ENSMUST00000165375	ENSMUSG00000075394	Hoxc4	Homeobox protein, antennapedia type||Homeodomain, metazoa||Homeobox domain||Homeodomain-like||Homeobox protein, antennapedia type, conserved site||Homeobox, conserved site	103018934	103036405	+	53595	downstream
XLOC_014951	--	Novel_lncRNA	103090001	103096286	+	ENSMUST00000100164	ENSMUSG00000075394	Hoxc4	Homeobox protein, antennapedia type||Homeodomain, metazoa||Homeobox domain||Homeodomain-like||Homeobox protein, antennapedia type, conserved site||Homeobox, conserved site	103034395	103036852	+	53148	downstream
XLOC_014857	--	Novel_lncRNA	99888132	99901101	+	ENSMUST00000100206	ENSMUSG00000023025	Larp4	RNA-binding protein Lupus La	99972780	100016351	+	71678	upstream
XLOC_014857	--	Novel_lncRNA	99888132	99901101	+	ENSMUST00000109024	ENSMUSG00000023022	Lima1	Zinc finger, LIM-type	99778470	99820143	-	67988	upstream
XLOC_014857	--	Novel_lncRNA	99888132	99901101	+	ENSMUST00000073691	ENSMUSG00000023022	Lima1	Zinc finger, LIM-type	99778470	99875428	-	12703	upstream
XLOC_014857	--	Novel_lncRNA	99888132	99901101	+	ENSMUST00000100209	ENSMUSG00000045350	Fam186a	-	99918353	99967075	-	17251	downstream
XLOC_014857	--	Novel_lncRNA	99888132	99901101	+	ENSMUST00000062631	ENSMUSG00000045350	Fam186a	-	99918348	99931796	-	17246	downstream
XLOC_014857	--	Novel_lncRNA	99888132	99901101	+	ENSMUST00000057632	ENSMUSG00000023025	Larp4	RNA-binding protein Lupus La	99970074	100016351	+	68972	upstream
XLOC_014739	--	Novel_lncRNA	88875693	88878610	+	ENSMUST00000109371	ENSMUSG00000022388	Ttll8	Tubulin-tyrosine ligase/Tubulin polyglutamylase||-	88913898	88954410	-	35287	downstream
XLOC_014739	--	Novel_lncRNA	88875693	88878610	+	ENSMUST00000162183	ENSMUSG00000035845	Alg12	GPI mannosyltransferase	88805244	88819318	-	56374	upstream
XLOC_014739	--	Novel_lncRNA	88875693	88878610	+	ENSMUST00000042818	ENSMUSG00000035828	Pim3	Protein kinase, ATP binding site||Protein kinase-like domain||Serine/threonine/dual specificity protein kinase, catalytic domain||Protein kinase domain||Serine/threonine-protein kinase, active site	88862186	88865718	+	9974	downstream
XLOC_014739	--	Novel_lncRNA	88875693	88878610	+	ENSMUST00000109368	ENSMUSG00000035805	Mlc1	-	88955884	88979007	-	77273	downstream
XLOC_014739	--	Novel_lncRNA	88875693	88878610	+	ENSMUST00000024042	ENSMUSG00000023272	Creld2	EGF-like, conserved site||Laminin EGF domain||Insulin-like growth factor binding protein, N-terminal||Furin-like repeat||EGF-like calcium-binding domain||EGF-type aspartate/asparagine hydroxylation site||EGF-like calcium-binding, conserved site||Domain of unknown function DUF3456||EGF-like domain	88819646	88826681	+	49011	downstream
XLOC_014739	--	Novel_lncRNA	88875693	88878610	+	ENSMUST00000043087	ENSMUSG00000035845	Alg12	GPI mannosyltransferase	88805245	88819285	-	56407	upstream
XLOC_014739	--	Novel_lncRNA	88875693	88878610	+	ENSMUST00000042594	ENSMUSG00000035805	Mlc1	-	88955884	88979007	-	77273	downstream
XLOC_014739	--	Novel_lncRNA	88875693	88878610	+	ENSMUST00000159328	ENSMUSG00000035845	Alg12	GPI mannosyltransferase	88814608	88819092	-	56600	upstream
XLOC_014739	--	Novel_lncRNA	88875693	88878610	+	ENSMUST00000041297	ENSMUSG00000034333	Zbed4	HAT dimerisation domain, C-terminal||Ribonuclease H-like domain||Zinc finger, BED-type	88751660	88784516	+	91176	downstream
XLOC_000331	--	Novel_lncRNA	36016775	36021734	+	ENSMUST00000088174	ENSMUSG00000045216	Hs6st1	P-loop containing nucleoside triphosphate hydrolase||Sulfotransferase	36068400	36106446	+	46665	upstream
ENSMUSG00000093535.1	4930533I22Rik	Annotated_lncRNA	57476697	57497671	+	ENSMUST00000042766	ENSMUSG00000037826	Ppm1k	PPM-type phosphatase, divalent cation binding||PPM-type phosphatase domain	57506502	57535426	-	8830	downstream
ENSMUSG00000093535.1	4930533I22Rik	Annotated_lncRNA	57476697	57497671	+	ENSMUST00000031817	ENSMUSG00000029798	Herc6	HECT domain||Regulator of chromosome condensation, RCC1||Regulator of chromosome condensation 1/beta-lactamase-inhibitor protein II	57581000	57664632	+	83328	upstream
ENSMUSG00000093535.1	4930533I22Rik	Annotated_lncRNA	57476697	57497671	+	ENSMUST00000089830	ENSMUSG00000068426	Vmn1r19	Vomeronasal receptor, type 1||GPCR, rhodopsin-like, 7TM	57404366	57405483	+	71213	downstream
ENSMUSG00000093535.1	4930533I22Rik	Annotated_lncRNA	57476697	57497671	+	ENSMUST00000164732	ENSMUSG00000091382	Vmn1r18	Vomeronasal receptor, type 1||GPCR, rhodopsin-like, 7TM	57389580	57390666	-	86030	upstream
ENSMUSG00000093535.1	4930533I22Rik	Annotated_lncRNA	57476697	57497671	+	ENSMUST00000176085	ENSMUSG00000093679	Vmn1r20	GPCR, rhodopsin-like, 7TM||Vomeronasal receptor, type 1	57431644	57432695	+	44001	downstream
ENSMUSG00000093535.1	4930533I22Rik	Annotated_lncRNA	57476697	57497671	+	ENSMUST00000204607	ENSMUSG00000037826	Ppm1k	PPM-type phosphatase, divalent cation binding||PPM-type phosphatase domain	57513597	57515607	-	15925	downstream
ENSMUSG00000074469.6	Gm15348	Annotated_lncRNA	12706944	12719127	-	ENSMUST00000000776	ENSMUSG00000000759	Tubgcp3	Gamma-tubulin complex component protein||-	12614277	12672248	-	34695	upstream
ENSMUSG00000074469.6	Gm15348	Annotated_lncRNA	12706944	12719127	-	ENSMUST00000091237	ENSMUSG00000031441	Atp11a	P-type ATPase, A domain||P-type ATPase, phosphorylation site||-||P-type ATPase, cytoplasmic domain N||P-type ATPase, subfamily IV||P-type ATPase||HAD-like domain	12757016	12868728	+	37888	upstream
ENSMUSG00000074469.6	Gm15348	Annotated_lncRNA	12706944	12719127	-	ENSMUST00000033818	ENSMUSG00000031441	Atp11a	P-type ATPase, A domain||P-type ATPase, phosphorylation site||-||P-type ATPase, cytoplasmic domain N||P-type ATPase, subfamily IV||P-type ATPase||HAD-like domain	12757014	12868728	+	37886	upstream
ENSMUSG00000097503.2	3110045C21Rik	Annotated_lncRNA	169969409	169972396	+	ENSMUST00000094348	ENSMUSG00000070532	1700084C01Rik	-	169928648	169934653	+	34755	downstream
ENSMUSG00000097503.2	3110045C21Rik	Annotated_lncRNA	169969409	169972396	+	ENSMUST00000175731	ENSMUSG00000070532	1700084C01Rik	-	169929929	169934413	+	34995	downstream
ENSMUSG00000097503.2	3110045C21Rik	Annotated_lncRNA	169969409	169972396	+	ENSMUST00000194690	ENSMUSG00000026674	Ddr2	Tyrosine-protein kinase, receptor class II, conserved site||Tyrosine-protein kinase, catalytic domain||Serine-threonine/tyrosine-protein kinase catalytic domain||Tyrosine-protein kinase, active site||Protein kinase domain||Protein kinase-like domain||Galactose-binding domain-like||Coagulation factor 5/8 C-terminal domain	169972307	170110561	-	-90	antisense
ENSMUSG00000097503.2	3110045C21Rik	Annotated_lncRNA	169969409	169972396	+	ENSMUST00000027989	ENSMUSG00000026675	Hsd17b7	Short-chain dehydrogenase/reductase SDR||Glucose/ribitol dehydrogenase	169949535	169969241	-	167	upstream
ENSMUSG00000097503.2	3110045C21Rik	Annotated_lncRNA	169969409	169972396	+	ENSMUST00000192312	ENSMUSG00000026674	Ddr2	Tyrosine-protein kinase, receptor class II, conserved site||Tyrosine-protein kinase, catalytic domain||Serine-threonine/tyrosine-protein kinase catalytic domain||Tyrosine-protein kinase, active site||Protein kinase domain||Protein kinase-like domain||Galactose-binding domain-like||Coagulation factor 5/8 C-terminal domain	170005103	170110729	-	32706	downstream
ENSMUSG00000097503.2	3110045C21Rik	Annotated_lncRNA	169969409	169972396	+	ENSMUST00000111353	ENSMUSG00000026675	Hsd17b7	Short-chain dehydrogenase/reductase SDR||Glucose/ribitol dehydrogenase	169955501	169969241	-	167	upstream
ENSMUSG00000097503.2	3110045C21Rik	Annotated_lncRNA	169969409	169972396	+	ENSMUST00000170800	ENSMUSG00000026674	Ddr2	Tyrosine-protein kinase, receptor class II, conserved site||Tyrosine-protein kinase, catalytic domain||Serine-threonine/tyrosine-protein kinase catalytic domain||Tyrosine-protein kinase, active site||Protein kinase domain||Protein kinase-like domain||Galactose-binding domain-like||Coagulation factor 5/8 C-terminal domain	169972308	170088944	-	-89	antisense
ENSMUSG00000097503.2	3110045C21Rik	Annotated_lncRNA	169969409	169972396	+	ENSMUST00000027985	ENSMUSG00000026674	Ddr2	Tyrosine-protein kinase, receptor class II, conserved site||Tyrosine-protein kinase, catalytic domain||Serine-threonine/tyrosine-protein kinase catalytic domain||Tyrosine-protein kinase, active site||Protein kinase domain||Protein kinase-like domain||Galactose-binding domain-like||Coagulation factor 5/8 C-terminal domain	169977804	170110501	-	5407	downstream
ENSMUSG00000101581.6	C430002N11Rik	Annotated_lncRNA	96765575	96774394	+	ENSMUST00000140121	ENSMUSG00000040433	Zbtb38	Zinc finger, C2H2||POZ domain||BTB/POZ domain||Zinc finger, C2H2-like	96687398	96720300	-	45274	upstream
ENSMUSG00000101581.6	C430002N11Rik	Annotated_lncRNA	96765575	96774394	+	ENSMUST00000121077	ENSMUSG00000043587	Pxylp1	-||Histidine phosphatase superfamily, clade-2||Histidine phosphatase superfamily	96825587	96862903	-	51192	downstream
ENSMUSG00000101581.6	C430002N11Rik	Annotated_lncRNA	96765575	96774394	+	ENSMUST00000120101	ENSMUSG00000043587	Pxylp1	-||Histidine phosphatase superfamily, clade-2||Histidine phosphatase superfamily	96823344	96889474	-	48949	downstream
ENSMUSG00000101581.6	C430002N11Rik	Annotated_lncRNA	96765575	96774394	+	ENSMUST00000124923	ENSMUSG00000043587	Pxylp1	-||Histidine phosphatase superfamily, clade-2||Histidine phosphatase superfamily	96840002	96862980	-	65607	downstream
ENSMUSG00000101581.6	C430002N11Rik	Annotated_lncRNA	96765575	96774394	+	ENSMUST00000112951	ENSMUSG00000043587	Pxylp1	-||Histidine phosphatase superfamily, clade-2||Histidine phosphatase superfamily	96823336	96889413	-	48941	downstream
ENSMUSG00000101581.6	C430002N11Rik	Annotated_lncRNA	96765575	96774394	+	ENSMUST00000093798	ENSMUSG00000040433	Zbtb38	Zinc finger, C2H2||POZ domain||BTB/POZ domain||Zinc finger, C2H2-like	96685423	96731675	-	33899	upstream
ENSMUSG00000101581.6	C430002N11Rik	Annotated_lncRNA	96765575	96774394	+	ENSMUST00000119141	ENSMUSG00000043587	Pxylp1	-||Histidine phosphatase superfamily, clade-2||Histidine phosphatase superfamily	96823586	96889433	-	49191	downstream
ENSMUSG00000101581.6	C430002N11Rik	Annotated_lncRNA	96765575	96774394	+	ENSMUST00000154146	ENSMUSG00000043587	Pxylp1	-||Histidine phosphatase superfamily, clade-2||Histidine phosphatase superfamily	96839196	96892669	-	64801	downstream
ENSMUSG00000101581.6	C430002N11Rik	Annotated_lncRNA	96765575	96774394	+	ENSMUST00000078478	ENSMUSG00000043587	Pxylp1	-||Histidine phosphatase superfamily, clade-2||Histidine phosphatase superfamily	96823344	96889429	-	48949	downstream
ENSMUSG00000101581.6	C430002N11Rik	Annotated_lncRNA	96765575	96774394	+	ENSMUST00000152594	ENSMUSG00000040433	Zbtb38	Zinc finger, C2H2||POZ domain||BTB/POZ domain||Zinc finger, C2H2-like	96682770	96752831	-	12743	upstream
ENSMUSG00000101581.6	C430002N11Rik	Annotated_lncRNA	96765575	96774394	+	ENSMUST00000126411	ENSMUSG00000043587	Pxylp1	-||Histidine phosphatase superfamily, clade-2||Histidine phosphatase superfamily	96825416	96889428	-	51021	downstream
ENSMUSG00000101581.6	C430002N11Rik	Annotated_lncRNA	96765575	96774394	+	ENSMUST00000128269	ENSMUSG00000040433	Zbtb38	Zinc finger, C2H2||POZ domain||BTB/POZ domain||Zinc finger, C2H2-like	96688477	96719565	-	46009	upstream
ENSMUSG00000085747.1	Slc13a2os	Annotated_lncRNA	78394485	78405657	+	ENSMUST00000002127	ENSMUSG00000002058	Unc119	Immunoglobulin E-set||GMP phosphodiesterase, delta subunit	78343482	78349164	+	45320	downstream
ENSMUSG00000085747.1	Slc13a2os	Annotated_lncRNA	78394485	78405657	+	ENSMUST00000125670	ENSMUSG00000001103	Sebox	Homeobox domain||Homeodomain-like||-	78503499	78505074	+	97841	upstream
ENSMUSG00000085747.1	Slc13a2os	Annotated_lncRNA	78394485	78405657	+	ENSMUST00000045026	ENSMUSG00000002055	Spag5	-	78301529	78322457	+	72027	downstream
ENSMUSG00000085747.1	Slc13a2os	Annotated_lncRNA	78394485	78405657	+	ENSMUST00000108294	ENSMUSG00000002057	Foxn1	Fork head domain	78357577	78386558	-	7926	upstream
ENSMUSG00000085747.1	Slc13a2os	Annotated_lncRNA	78394485	78405657	+	ENSMUST00000102478	ENSMUSG00000017390	Aldoc	Fructose-bisphosphate aldolase class-I active site||Fructose-bisphosphate aldolase, class-I	78324200	78326760	+	67724	downstream
ENSMUSG00000085747.1	Slc13a2os	Annotated_lncRNA	78394485	78405657	+	ENSMUST00000061174	ENSMUSG00000050132	Sarm1	Toll/interleukin-1 receptor homology (TIR) domain||Sterile alpha motif domain||Sterile alpha motif/pointed domain||Armadillo-type fold	78473291	78497754	-	67633	downstream
ENSMUSG00000085747.1	Slc13a2os	Annotated_lncRNA	78394485	78405657	+	ENSMUST00000108295	ENSMUSG00000002058	Unc119	Immunoglobulin E-set||GMP phosphodiesterase, delta subunit	78343506	78349164	+	45320	downstream
ENSMUSG00000085747.1	Slc13a2os	Annotated_lncRNA	78394485	78405657	+	ENSMUST00000048073	ENSMUSG00000041958	Pigs	Phosphatidylinositol-glycan biosynthesis class S protein	78328415	78342782	+	51702	downstream
ENSMUSG00000085747.1	Slc13a2os	Annotated_lncRNA	78394485	78405657	+	ENSMUST00000108287	ENSMUSG00000050132	Sarm1	Toll/interleukin-1 receptor homology (TIR) domain||Sterile alpha motif domain||Sterile alpha motif/pointed domain||Armadillo-type fold	78472330	78497458	-	66672	downstream
ENSMUSG00000085747.1	Slc13a2os	Annotated_lncRNA	78394485	78405657	+	ENSMUST00000017488	ENSMUSG00000017344	Vtn	Hemopexin-like repeats||Somatomedin B domain||Hemopexin-like domain||Hemopexin, conserved site||Somatomedin B, chordata	78499120	78502324	+	93462	upstream
ENSMUSG00000085747.1	Slc13a2os	Annotated_lncRNA	78394485	78405657	+	ENSMUST00000100755	ENSMUSG00000002058	Unc119	Immunoglobulin E-set||GMP phosphodiesterase, delta subunit	78346666	78348979	+	45505	downstream
ENSMUSG00000085747.1	Slc13a2os	Annotated_lncRNA	78394485	78405657	+	ENSMUST00000017534	ENSMUSG00000017390	Aldoc	Fructose-bisphosphate aldolase class-I active site||Fructose-bisphosphate aldolase, class-I	78322968	78327781	+	66703	downstream
ENSMUSG00000085747.1	Slc13a2os	Annotated_lncRNA	78394485	78405657	+	ENSMUST00000001130	ENSMUSG00000001103	Sebox	Homeobox domain||Homeodomain-like||-	78503447	78505081	+	97789	upstream
ENSMUSG00000085747.1	Slc13a2os	Annotated_lncRNA	78394485	78405657	+	ENSMUST00000001126	ENSMUSG00000020829	Slc46a1	Sugar transporter, conserved site||Major facilitator superfamily||Major facilitator superfamily domain||-	78465697	78471945	+	60039	upstream
ENSMUSG00000085747.1	Slc13a2os	Annotated_lncRNA	78394485	78405657	+	ENSMUST00000001122	ENSMUSG00000001095	Slc13a2	Sodium/sulphate symporter, conserved site||Sodium/sulphate symporter	78397087	78422217	-	-8571	antisense
XLOC_040723	--	Novel_lncRNA	110630163	110635422	-	ENSMUST00000166020	ENSMUSG00000038371	Sbf2	DENN domain||GRAM domain||Pleckstrin homology domain||uDENN domain||Myotubularin-like phosphatase domain||SBF1/SBF2 domain||-||Protein-tyrosine phosphatase-like||dDENN domain	110309398	110614761	-	15401	upstream
XLOC_040723	--	Novel_lncRNA	110630163	110635422	-	ENSMUST00000033054	ENSMUSG00000030790	Adm	Adrenomedullin||Procalcitonin/adrenomedullin	110627669	110629819	+	343	downstream
XLOC_040723	--	Novel_lncRNA	110630163	110635422	-	ENSMUST00000164759	ENSMUSG00000038371	Sbf2	DENN domain||GRAM domain||Pleckstrin homology domain||uDENN domain||Myotubularin-like phosphatase domain||SBF1/SBF2 domain||-||Protein-tyrosine phosphatase-like||dDENN domain	110308013	110614922	-	15240	upstream
XLOC_040723	--	Novel_lncRNA	110630163	110635422	-	ENSMUST00000033058	ENSMUSG00000038371	Sbf2	DENN domain||GRAM domain||Pleckstrin homology domain||uDENN domain||Myotubularin-like phosphatase domain||SBF1/SBF2 domain||-||Protein-tyrosine phosphatase-like||dDENN domain	110308022	110614920	-	15242	upstream
XLOC_040723	--	Novel_lncRNA	110630163	110635422	-	ENSMUST00000171218	ENSMUSG00000038371	Sbf2	DENN domain||GRAM domain||Pleckstrin homology domain||uDENN domain||Myotubularin-like phosphatase domain||SBF1/SBF2 domain||-||Protein-tyrosine phosphatase-like||dDENN domain	110441287	110614905	-	15257	upstream
XLOC_040723	--	Novel_lncRNA	110630163	110635422	-	ENSMUST00000186620	ENSMUSG00000030790	Adm	Adrenomedullin||Procalcitonin/adrenomedullin	110627661	110629820	+	342	downstream
XLOC_041116	--	Novel_lncRNA	145223773	145228314	-	ENSMUST00000033386	ENSMUSG00000031070	Mrgprf	Mas-related G protein-coupled receptor family||-||G protein-coupled receptor, rhodopsin-like||GPCR, rhodopsin-like, 7TM||Mas-related G protein-coupled receptor F	145300828	145309557	+	72513	upstream
XLOC_041116	--	Novel_lncRNA	145223773	145228314	-	ENSMUST00000058022	ENSMUSG00000048677	Tpcn2	Ion transport domain	145253923	145283927	-	25608	downstream
XLOC_041116	--	Novel_lncRNA	145223773	145228314	-	ENSMUST00000117718	ENSMUSG00000031070	Mrgprf	Mas-related G protein-coupled receptor family||-||G protein-coupled receptor, rhodopsin-like||GPCR, rhodopsin-like, 7TM||Mas-related G protein-coupled receptor F	145300899	145309349	+	72584	upstream
XLOC_041116	--	Novel_lncRNA	145223773	145228314	-	ENSMUST00000062163	ENSMUSG00000051207	Mrgprd	G protein-coupled receptor, rhodopsin-like||GPCR, rhodopsin-like, 7TM||Mas-related G protein-coupled receptor D||Mas-related G protein-coupled receptor family	145314835	145324059	+	86520	upstream
XLOC_041157	--	Novel_lncRNA	4809224	4829438	+	ENSMUST00000022945	ENSMUSG00000022322	Shcbp1	Parallel beta-helix repeat||Pectin lyase fold/virulence factor	4735980	4779534	-	29689	upstream
ENSMUSG00000086320.1	Gm12840	Annotated_lncRNA	117700188	117700923	+	ENSMUST00000037127	ENSMUSG00000033423	Eri3	Ribonuclease H-like domain||Exonuclease, RNase T/DNA polymerase III	117550365	117674297	+	25890	downstream
ENSMUSG00000086320.1	Gm12840	Annotated_lncRNA	117700188	117700923	+	ENSMUST00000125312	ENSMUSG00000033423	Eri3	Ribonuclease H-like domain||Exonuclease, RNase T/DNA polymerase III	117582687	117615582	+	84605	downstream
ENSMUSG00000086320.1	Gm12840	Annotated_lncRNA	117700188	117700923	+	ENSMUST00000203629	ENSMUSG00000108127	Gm12845	Zinc finger, C2H2||Zinc finger, C2H2-like	117724412	117726872	+	23488	upstream
ENSMUSG00000086320.1	Gm12840	Annotated_lncRNA	117700188	117700923	+	ENSMUST00000102687	ENSMUSG00000009640	Dmap1	DNA methyltransferase 1-associated 1	117674681	117682273	-	17914	upstream
ENSMUSG00000086320.1	Gm12840	Annotated_lncRNA	117700188	117700923	+	ENSMUST00000204276	ENSMUSG00000108127	Gm12845	Zinc finger, C2H2||Zinc finger, C2H2-like	117724475	117726866	+	23551	upstream
ENSMUSG00000086320.1	Gm12840	Annotated_lncRNA	117700188	117700923	+	ENSMUST00000062747	ENSMUSG00000048626	Klf17	Zinc finger, C2H2-like||Zinc finger, C2H2	117757836	117765648	-	56912	downstream
ENSMUSG00000085998.7	AW822252	Annotated_lncRNA	53696868	53710481	-	ENSMUST00000114810	ENSMUSG00000054626	Xlr	XLR/SYCP3/FAM9 domain	53783748	53797696	-	73266	downstream
ENSMUSG00000085998.7	AW822252	Annotated_lncRNA	53696868	53710481	-	ENSMUST00000088779	ENSMUSG00000067925	Cxx1a	-	53642488	53643682	-	53185	upstream
ENSMUSG00000085998.7	AW822252	Annotated_lncRNA	53696868	53710481	-	ENSMUST00000069209	ENSMUSG00000055555	4930502E18Rik	-	53724826	53738441	+	14344	upstream
ENSMUSG00000085998.7	AW822252	Annotated_lncRNA	53696868	53710481	-	ENSMUST00000071711	ENSMUSG00000059334	Zfp36l3	Trimeric LpxA-like||Zinc finger, CCCH-type	53774048	53776394	-	63566	downstream
ENSMUSG00000085998.7	AW822252	Annotated_lncRNA	53696868	53710481	-	ENSMUST00000063384	ENSMUSG00000051851	Cxx1c	-	53608032	53608432	+	88435	downstream
ENSMUSG00000085998.7	AW822252	Annotated_lncRNA	53696868	53710481	-	ENSMUST00000067940	ENSMUSG00000054727	1700013H16Rik	XLR/SYCP3/FAM9 domain	53742901	53757831	-	32419	downstream
ENSMUSG00000085998.7	AW822252	Annotated_lncRNA	53696868	53710481	-	ENSMUST00000067763	ENSMUSG00000054626	Xlr	XLR/SYCP3/FAM9 domain	53783748	53797696	-	73266	downstream
ENSMUSG00000085998.7	AW822252	Annotated_lncRNA	53696868	53710481	-	ENSMUST00000067782	ENSMUSG00000054626	Xlr	XLR/SYCP3/FAM9 domain	53777118	53797706	-	66636	downstream
ENSMUSG00000085998.7	AW822252	Annotated_lncRNA	53696868	53710481	-	ENSMUST00000123034	ENSMUSG00000079593	Gm14597	S1-like RNA binding domain	53577087	53608979	-	87888	upstream
ENSMUSG00000085998.7	AW822252	Annotated_lncRNA	53696868	53710481	-	ENSMUST00000088778	ENSMUSG00000067924	Cxx1b	-	53669177	53670408	-	26459	upstream
XLOC_014453	--	Novel_lncRNA	60781418	60799484	+	ENSMUST00000100635	ENSMUSG00000072568	Fam84b	LRAT-like domain	60818994	60825080	-	19509	downstream
ENSMUSG00000097764.1	Gm26635	Annotated_lncRNA	17254960	17260326	-	ENSMUST00000115706	ENSMUSG00000041774	Ydjc	Glycoside hydrolase/deacetylase, beta/alpha-barrel||Chitooligosaccharide deacetylase ChbG	17146937	17160701	+	94258	downstream
ENSMUSG00000097764.1	Gm26635	Annotated_lncRNA	17254960	17260326	-	ENSMUST00000036161	ENSMUSG00000041720	Pi4ka	Phosphatidylinositol 3-/4-kinase, catalytic domain||Phosphoinositide 3-kinase, accessory (PIK) domain||Phosphatidylinositol 3/4-kinase, conserved site||Armadillo-type fold||-||Protein kinase-like domain	17280351	17406314	-	20024	downstream
ENSMUSG00000097764.1	Gm26635	Annotated_lncRNA	17254960	17260326	-	ENSMUST00000159065	ENSMUSG00000055692	Tmem191c	Transmembrane protein 191B/C	17276342	17278657	+	16015	upstream
ENSMUSG00000097764.1	Gm26635	Annotated_lncRNA	17254960	17260326	-	ENSMUST00000161034	ENSMUSG00000022766	Serpind1	Serpin, conserved site||Serpin domain	17331383	17343574	+	71056	upstream
ENSMUSG00000097764.1	Gm26635	Annotated_lncRNA	17254960	17260326	-	ENSMUST00000164950	ENSMUSG00000055692	Tmem191c	Transmembrane protein 191B/C	17276300	17278660	+	15973	upstream
ENSMUSG00000097764.1	Gm26635	Annotated_lncRNA	17254960	17260326	-	ENSMUST00000149309	ENSMUSG00000041720	Pi4ka	Phosphatidylinositol 3-/4-kinase, catalytic domain||Phosphoinositide 3-kinase, accessory (PIK) domain||Phosphatidylinositol 3/4-kinase, conserved site||Armadillo-type fold||-||Protein kinase-like domain	17312431	17350832	-	52104	downstream
ENSMUSG00000097764.1	Gm26635	Annotated_lncRNA	17254960	17260326	-	ENSMUST00000090190	ENSMUSG00000050240	Hic2	Zinc finger, C2H2-like||BTB/POZ domain||POZ domain||Zinc finger, C2H2	17233572	17263430	+	-5367	antisense
ENSMUSG00000097764.1	Gm26635	Annotated_lncRNA	17254960	17260326	-	ENSMUST00000090192	ENSMUSG00000038965	Ube2l3	Ubiquitin-conjugating enzyme/RWD-like||Ubiquitin-conjugating enzyme E2||Ubiquitin-conjugating enzyme, active site	17152015	17201492	-	53467	upstream
ENSMUSG00000097764.1	Gm26635	Annotated_lncRNA	17254960	17260326	-	ENSMUST00000161775	ENSMUSG00000055692	Tmem191c	Transmembrane protein 191B/C	17276860	17278205	+	16533	upstream
ENSMUSG00000097764.1	Gm26635	Annotated_lncRNA	17254960	17260326	-	ENSMUST00000154364	ENSMUSG00000041720	Pi4ka	Phosphatidylinositol 3-/4-kinase, catalytic domain||Phosphoinositide 3-kinase, accessory (PIK) domain||Phosphatidylinositol 3/4-kinase, conserved site||Armadillo-type fold||-||Protein kinase-like domain	17280352	17405893	-	20025	downstream
ENSMUSG00000097764.1	Gm26635	Annotated_lncRNA	17254960	17260326	-	ENSMUST00000023450	ENSMUSG00000022766	Serpind1	Serpin, conserved site||Serpin domain	17331371	17343575	+	71044	upstream
ENSMUSG00000097764.1	Gm26635	Annotated_lncRNA	17254960	17260326	-	ENSMUST00000169803	ENSMUSG00000071636	Rimbp3	Fibronectin type III||Variant SH3 domain||SH3 domain	17208135	17213921	+	41038	downstream
ENSMUSG00000097764.1	Gm26635	Annotated_lncRNA	17254960	17260326	-	ENSMUST00000159242	ENSMUSG00000055692	Tmem191c	Transmembrane protein 191B/C	17276309	17278661	+	15982	upstream
ENSMUSG00000097764.1	Gm26635	Annotated_lncRNA	17254960	17260326	-	ENSMUST00000162085	ENSMUSG00000055692	Tmem191c	Transmembrane protein 191B/C	17276970	17283229	+	16643	upstream
ENSMUSG00000097764.1	Gm26635	Annotated_lncRNA	17254960	17260326	-	ENSMUST00000159811	ENSMUSG00000055692	Tmem191c	Transmembrane protein 191B/C	17276445	17278661	+	16118	upstream
ENSMUSG00000097764.1	Gm26635	Annotated_lncRNA	17254960	17260326	-	ENSMUST00000159494	ENSMUSG00000055692	Tmem191c	Transmembrane protein 191B/C	17276434	17277737	+	16107	upstream
ENSMUSG00000097764.1	Gm26635	Annotated_lncRNA	17254960	17260326	-	ENSMUST00000115699	ENSMUSG00000038965	Ube2l3	Ubiquitin-conjugating enzyme/RWD-like||Ubiquitin-conjugating enzyme E2||Ubiquitin-conjugating enzyme, active site	17152013	17202649	-	52310	upstream
ENSMUSG00000097764.1	Gm26635	Annotated_lncRNA	17254960	17260326	-	ENSMUST00000115698	ENSMUSG00000050240	Hic2	Zinc finger, C2H2-like||BTB/POZ domain||POZ domain||Zinc finger, C2H2	17233664	17261595	+	-5367	antisense
ENSMUSG00000097764.1	Gm26635	Annotated_lncRNA	17254960	17260326	-	ENSMUST00000069420	ENSMUSG00000055692	Tmem191c	Transmembrane protein 191B/C	17276677	17278661	+	16350	upstream
ENSMUSG00000097764.1	Gm26635	Annotated_lncRNA	17254960	17260326	-	ENSMUST00000115700	ENSMUSG00000038965	Ube2l3	Ubiquitin-conjugating enzyme/RWD-like||Ubiquitin-conjugating enzyme E2||Ubiquitin-conjugating enzyme, active site	17153310	17201494	-	53465	upstream
ENSMUSG00000097764.1	Gm26635	Annotated_lncRNA	17254960	17260326	-	ENSMUST00000155928	ENSMUSG00000041720	Pi4ka	Phosphatidylinositol 3-/4-kinase, catalytic domain||Phosphoinositide 3-kinase, accessory (PIK) domain||Phosphatidylinositol 3/4-kinase, conserved site||Armadillo-type fold||-||Protein kinase-like domain	17280352	17308107	-	20025	downstream
ENSMUSG00000097281.2	Gm26685	Annotated_lncRNA	164503309	164514882	+	ENSMUST00000027863	ENSMUSG00000026576	Atp1b1	Sodium/potassium-transporting ATPase subunit beta	164437109	164458355	-	44953	upstream
ENSMUSG00000097281.2	Gm26685	Annotated_lncRNA	164503309	164514882	+	ENSMUST00000193367	ENSMUSG00000026576	Atp1b1	Sodium/potassium-transporting ATPase subunit beta	164441459	164453777	-	49531	upstream
ENSMUSG00000097281.2	Gm26685	Annotated_lncRNA	164503309	164514882	+	ENSMUST00000191947	ENSMUSG00000026575	Nme7	Uncharacterised domain DM10||Nucleoside diphosphate kinase, NDK7||Nucleoside diphosphate kinase	164308073	164437294	+	66014	downstream
ENSMUSG00000097281.2	Gm26685	Annotated_lncRNA	164503309	164514882	+	ENSMUST00000193683	ENSMUSG00000026575	Nme7	Uncharacterised domain DM10||Nucleoside diphosphate kinase, NDK7||Nucleoside diphosphate kinase	164307672	164437300	+	66008	downstream
XLOC_002590	--	Novel_lncRNA	127698741	127719450	-	ENSMUST00000187653	ENSMUSG00000051590	Map3k19	Protein kinase, ATP binding site||Protein kinase-like domain||Serine/threonine/dual specificity protein kinase, catalytic domain||Serine/threonine-protein kinase, active site||Protein kinase domain	127815253	127840321	-	95802	downstream
XLOC_002590	--	Novel_lncRNA	127698741	127719450	-	ENSMUST00000038006	ENSMUSG00000026348	Acmsd	Amidohydrolase-related	127729413	127767978	+	9962	upstream
XLOC_002590	--	Novel_lncRNA	127698741	127719450	-	ENSMUST00000112570	ENSMUSG00000026349	Ccnt2	Cyclin-like||Cyclin, N-terminal	127774164	127805932	+	54713	upstream
XLOC_002590	--	Novel_lncRNA	127698741	127719450	-	ENSMUST00000185560	ENSMUSG00000026347	Tmem163	-	127490898	127679548	-	19192	upstream
XLOC_002590	--	Novel_lncRNA	127698741	127719450	-	ENSMUST00000160616	ENSMUSG00000026347	Tmem163	-	127486558	127678021	-	20719	upstream
XLOC_002590	--	Novel_lncRNA	127698741	127719450	-	ENSMUST00000027587	ENSMUSG00000026349	Ccnt2	Cyclin-like||Cyclin, N-terminal	127774164	127808061	+	54713	upstream
XLOC_002590	--	Novel_lncRNA	127698741	127719450	-	ENSMUST00000191333	ENSMUSG00000051590	Map3k19	Protein kinase, ATP binding site||Protein kinase-like domain||Serine/threonine/dual specificity protein kinase, catalytic domain||Serine/threonine-protein kinase, active site||Protein kinase domain	127815262	127840321	-	95811	downstream
XLOC_002590	--	Novel_lncRNA	127698741	127719450	-	ENSMUST00000061512	ENSMUSG00000051590	Map3k19	Protein kinase, ATP binding site||Protein kinase-like domain||Serine/threonine/dual specificity protein kinase, catalytic domain||Serine/threonine-protein kinase, active site||Protein kinase domain	127815271	127840321	-	95820	downstream
XLOC_002590	--	Novel_lncRNA	127698741	127719450	-	ENSMUST00000189398	ENSMUSG00000051590	Map3k19	Protein kinase, ATP binding site||Protein kinase-like domain||Serine/threonine/dual specificity protein kinase, catalytic domain||Serine/threonine-protein kinase, active site||Protein kinase domain	127815262	127840321	-	95811	downstream
XLOC_003185	--	Novel_lncRNA	186024059	186047801	-	ENSMUST00000045388	ENSMUSG00000039246	Lyplal1	Alpha/Beta hydrolase fold||Phospholipase/carboxylesterase/thioesterase	186087731	186117310	-	39929	downstream
ENSMUSG00000097254.1	C430042M11Rik	Annotated_lncRNA	83851675	83854393	-	ENSMUST00000176816	ENSMUSG00000055817	Mta3	SANT domain||-||Zinc finger, GATA-type||Bromo adjacent homology (BAH) domain||SANT/Myb domain||ELM2 domain||Homeodomain-like	83755634	83800240	+	51434	downstream
ENSMUSG00000097254.1	C430042M11Rik	Annotated_lncRNA	83851675	83854393	-	ENSMUST00000176054	ENSMUSG00000055817	Mta3	SANT domain||-||Zinc finger, GATA-type||Bromo adjacent homology (BAH) domain||SANT/Myb domain||ELM2 domain||Homeodomain-like	83784334	83820216	+	31458	downstream
ENSMUSG00000097254.1	C430042M11Rik	Annotated_lncRNA	83851675	83854393	-	ENSMUST00000000687	ENSMUSG00000000673	Haao	3-hydroxyanthranilic acid dioxygenase||RmlC-like cupin domain||3-hydroxyanthranilate 3, 4-dioxygenase, metazoan	83831356	83846790	-	4884	upstream
ENSMUSG00000097254.1	C430042M11Rik	Annotated_lncRNA	83851675	83854393	-	ENSMUST00000067826	ENSMUSG00000055817	Mta3	SANT domain||-||Zinc finger, GATA-type||Bromo adjacent homology (BAH) domain||SANT/Myb domain||ELM2 domain||Homeodomain-like	83706191	83814905	+	36769	downstream
ENSMUSG00000097254.1	C430042M11Rik	Annotated_lncRNA	83851675	83854393	-	ENSMUST00000112352	ENSMUSG00000055817	Mta3	SANT domain||-||Zinc finger, GATA-type||Bromo adjacent homology (BAH) domain||SANT/Myb domain||ELM2 domain||Homeodomain-like	83706163	83805423	+	46251	downstream
ENSMUSG00000097254.1	C430042M11Rik	Annotated_lncRNA	83851675	83854393	-	ENSMUST00000112350	ENSMUSG00000055817	Mta3	SANT domain||-||Zinc finger, GATA-type||Bromo adjacent homology (BAH) domain||SANT/Myb domain||ELM2 domain||Homeodomain-like	83706163	83792873	+	58801	downstream
ENSMUSG00000097254.1	C430042M11Rik	Annotated_lncRNA	83851675	83854393	-	ENSMUST00000112349	ENSMUSG00000055817	Mta3	SANT domain||-||Zinc finger, GATA-type||Bromo adjacent homology (BAH) domain||SANT/Myb domain||ELM2 domain||Homeodomain-like	83706163	83792875	+	58799	downstream
ENSMUSG00000075010.4	AW112010	Annotated_lncRNA	11047617	11050566	-	ENSMUST00000025635	ENSMUSG00000024729	1700017D01Rik	CD20-like family	11096816	11130876	-	46249	downstream
ENSMUSG00000075010.4	AW112010	Annotated_lncRNA	11047617	11050566	-	ENSMUST00000191343	ENSMUSG00000024731	Ms4a10	-||CD20-like family	10962297	10974645	-	72971	upstream
ENSMUSG00000075010.4	AW112010	Annotated_lncRNA	11047617	11050566	-	ENSMUST00000025636	ENSMUSG00000024730	Ms4a8a	CD20-like family	11067471	11081102	-	16904	downstream
ENSMUSG00000075010.4	AW112010	Annotated_lncRNA	11047617	11050566	-	ENSMUST00000181567	ENSMUSG00000024728	1700025F22Rik	CD20-like family||-	11139664	11165306	-	89097	downstream
ENSMUSG00000075010.4	AW112010	Annotated_lncRNA	11047617	11050566	-	ENSMUST00000025639	ENSMUSG00000024732	Ccdc86	-	10941481	10949266	-	98350	upstream
ENSMUSG00000075010.4	AW112010	Annotated_lncRNA	11047617	11050566	-	ENSMUST00000072748	ENSMUSG00000024731	Ms4a10	-||CD20-like family	10962293	10974670	-	72946	upstream
ENSMUSG00000075010.4	AW112010	Annotated_lncRNA	11047617	11050566	-	ENSMUST00000177684	ENSMUSG00000094584	Ms4a18	CD20-like family	10997025	11018031	-	29585	upstream
ENSMUSG00000075010.4	AW112010	Annotated_lncRNA	11047617	11050566	-	ENSMUST00000190246	ENSMUSG00000024731	Ms4a10	-||CD20-like family	10962300	10965856	-	81760	upstream
ENSMUSG00000075010.4	AW112010	Annotated_lncRNA	11047617	11050566	-	ENSMUST00000087923	ENSMUSG00000067571	Ms4a15	-||CD20-like family	10978307	10993250	-	54366	upstream
ENSMUSG00000075010.4	AW112010	Annotated_lncRNA	11047617	11050566	-	ENSMUST00000180678	ENSMUSG00000024728	1700025F22Rik	CD20-like family||-	11139664	11165306	-	89097	downstream
ENSMUSG00000075010.4	AW112010	Annotated_lncRNA	11047617	11050566	-	ENSMUST00000145110	ENSMUSG00000067571	Ms4a15	-||CD20-like family	10983173	10993181	-	54435	upstream
ENSMUSG00000075010.4	AW112010	Annotated_lncRNA	11047617	11050566	-	ENSMUST00000144485	ENSMUSG00000067571	Ms4a15	-||CD20-like family	10983259	10993230	-	54386	upstream
ENSMUSG00000075010.4	AW112010	Annotated_lncRNA	11047617	11050566	-	ENSMUST00000078770	ENSMUSG00000024728	1700025F22Rik	CD20-like family||-	11139664	11165320	-	89097	downstream
ENSMUSG00000075010.4	AW112010	Annotated_lncRNA	11047617	11050566	-	ENSMUST00000181284	ENSMUSG00000024728	1700025F22Rik	CD20-like family||-	11139664	11159178	-	89097	downstream
ENSMUSG00000098041.1	Gm26981	Annotated_lncRNA	92729840	92733748	+	ENSMUST00000118157	ENSMUSG00000041343	Ankrd42	Ankyrin repeat||Ankyrin repeat-containing domain	92584183	92637142	-	92697	upstream
ENSMUSG00000098041.1	Gm26981	Annotated_lncRNA	92729840	92733748	+	ENSMUST00000119954	ENSMUSG00000041328	Pcf11	ENTH/VHS||CID domain||-||RNA polymerase II-binding domain	92643712	92669933	-	59906	upstream
ENSMUSG00000098041.1	Gm26981	Annotated_lncRNA	92729840	92733748	+	ENSMUST00000032879	ENSMUSG00000030643	Rab30	Small GTPase superfamily, Rab type||Small GTPase superfamily, Ras type||P-loop containing nucleoside triphosphate hydrolase||Ran GTPase||Small GTP-binding protein domain||Small GTPase superfamily, Rho type||Small GTPase superfamily	92741603	92837117	+	7854	upstream
ENSMUSG00000098041.1	Gm26981	Annotated_lncRNA	92729840	92733748	+	ENSMUST00000107180	ENSMUSG00000030643	Rab30	Small GTPase superfamily, Rab type||Small GTPase superfamily, Ras type||P-loop containing nucleoside triphosphate hydrolase||Ran GTPase||Small GTP-binding protein domain||Small GTPase superfamily, Rho type||Small GTPase superfamily	92819905	92836647	+	86156	upstream
ENSMUSG00000098041.1	Gm26981	Annotated_lncRNA	92729840	92733748	+	ENSMUST00000056106	ENSMUSG00000041343	Ankrd42	Ankyrin repeat||Ankyrin repeat-containing domain	92581723	92637102	-	92737	upstream
ENSMUSG00000098041.1	Gm26981	Annotated_lncRNA	92729840	92733748	+	ENSMUST00000107179	ENSMUSG00000030643	Rab30	Small GTPase superfamily, Rab type||Small GTPase superfamily, Ras type||P-loop containing nucleoside triphosphate hydrolase||Ran GTPase||Small GTP-binding protein domain||Small GTPase superfamily, Rho type||Small GTPase superfamily	92819920	92836644	+	86171	upstream
ENSMUSG00000098041.1	Gm26981	Annotated_lncRNA	92729840	92733748	+	ENSMUST00000151177	ENSMUSG00000041328	Pcf11	ENTH/VHS||CID domain||-||RNA polymerase II-binding domain	92644260	92663537	-	66302	upstream
ENSMUSG00000097724.2	Gm26850	Annotated_lncRNA	63963633	63968659	+	ENSMUST00000160883	ENSMUSG00000027822	Slc33a1	Major facilitator superfamily domain||Acetyl-coenzyme A transporter 1||AmpG-like permease/Acetyl-coenzyme A transporter 1	63942414	63964372	-	-740	antisense
ENSMUSG00000097724.2	Gm26850	Annotated_lncRNA	63963633	63968659	+	ENSMUST00000161659	ENSMUSG00000027822	Slc33a1	Major facilitator superfamily domain||Acetyl-coenzyme A transporter 1||AmpG-like permease/Acetyl-coenzyme A transporter 1	63933507	63964666	-	-1034	antisense
ENSMUSG00000097724.2	Gm26850	Annotated_lncRNA	63963633	63968659	+	ENSMUST00000029405	ENSMUSG00000027823	Gmps	GMP synthetase ATP pyrophosphatase domain||Class I glutamine amidotransferase-like||GMP synthase, N-terminal||Glutamine amidotransferase||NAD/GMP synthase||GMP synthase, C-terminal	63976106	64022579	+	7446	upstream
ENSMUSG00000097724.2	Gm26850	Annotated_lncRNA	63963633	63968659	+	ENSMUST00000029402	ENSMUSG00000027822	Slc33a1	Major facilitator superfamily domain||Acetyl-coenzyme A transporter 1||AmpG-like permease/Acetyl-coenzyme A transporter 1	63942330	63964768	-	-1136	antisense
ENSMUSG00000097724.2	Gm26850	Annotated_lncRNA	63963633	63968659	+	ENSMUST00000061706	ENSMUSG00000048581	E130311K13Rik	-	63914684	63929472	-	34160	upstream
ENSMUSG00000097724.2	Gm26850	Annotated_lncRNA	63963633	63968659	+	ENSMUST00000161052	ENSMUSG00000036834	Plch1	Pleckstrin homology domain||C2 domain||Phosphoinositide-specific phospholipase C, EF-hand-like domain||EF-hand domain||Phosphoinositide phospholipase C family||PLC-like phosphodiesterase, TIM beta/alpha-barrel domain||-||Phospholipase C, phosphatidylinositol-specific, Y domain||Phosphatidylinositol-specific phospholipase C, X domain||EF-Hand 1, calcium-binding site||EF-hand domain pair	63869450	63899373	-	64259	upstream
ENSMUSG00000097724.2	Gm26850	Annotated_lncRNA	63963633	63968659	+	ENSMUST00000177143	ENSMUSG00000036834	Plch1	Pleckstrin homology domain||C2 domain||Phosphoinositide-specific phospholipase C, EF-hand-like domain||EF-hand domain||Phosphoinositide phospholipase C family||PLC-like phosphodiesterase, TIM beta/alpha-barrel domain||-||Phospholipase C, phosphatidylinositol-specific, Y domain||Phosphatidylinositol-specific phospholipase C, X domain||EF-Hand 1, calcium-binding site||EF-hand domain pair	63696731	63899472	-	64160	upstream
ENSMUSG00000097724.2	Gm26850	Annotated_lncRNA	63963633	63968659	+	ENSMUST00000159188	ENSMUSG00000036834	Plch1	Pleckstrin homology domain||C2 domain||Phosphoinositide-specific phospholipase C, EF-hand-like domain||EF-hand domain||Phosphoinositide phospholipase C family||PLC-like phosphodiesterase, TIM beta/alpha-barrel domain||-||Phospholipase C, phosphatidylinositol-specific, Y domain||Phosphatidylinositol-specific phospholipase C, X domain||EF-Hand 1, calcium-binding site||EF-hand domain pair	63781377	63899442	-	64190	upstream
XLOC_038719	--	Novel_lncRNA	125954087	125959754	+	ENSMUST00000073935	ENSMUSG00000046182	Gsg1l	GSG1-like	125878420	126082411	-	-5668	antisense
XLOC_038719	--	Novel_lncRNA	125954087	125959754	+	ENSMUST00000069660	ENSMUSG00000032743	D430042O09Rik	-||Domain of unknown function DUF4457	125707915	125874793	+	79293	downstream
XLOC_038719	--	Novel_lncRNA	125954087	125959754	+	ENSMUST00000132204	ENSMUSG00000032743	D430042O09Rik	-||Domain of unknown function DUF4457	125860682	125872252	+	81834	downstream
XLOC_038719	--	Novel_lncRNA	125954087	125959754	+	ENSMUST00000124223	ENSMUSG00000032743	D430042O09Rik	-||Domain of unknown function DUF4457	125707888	125874548	+	79538	downstream
XLOC_039500	--	Novel_lncRNA	25483221	25489508	-	ENSMUST00000098666	ENSMUSG00000074272	Ceacam1	Immunoglobulin||Immunoglobulin subtype 2||Immunoglobulin-like domain||Immunoglobulin V-set domain||Immunoglobulin subtype	25461707	25477603	-	5617	upstream
XLOC_039500	--	Novel_lncRNA	25483221	25489508	-	ENSMUST00000200880	ENSMUSG00000060188	Cxcl17	VEGF co-regulated chemokine 1	25400053	25412886	-	70334	upstream
XLOC_039500	--	Novel_lncRNA	25483221	25489508	-	ENSMUST00000205308	ENSMUSG00000074272	Ceacam1	Immunoglobulin||Immunoglobulin subtype 2||Immunoglobulin-like domain||Immunoglobulin V-set domain||Immunoglobulin subtype	25463693	25477534	-	5686	upstream
XLOC_039500	--	Novel_lncRNA	25483221	25489508	-	ENSMUST00000206676	ENSMUSG00000074272	Ceacam1	Immunoglobulin||Immunoglobulin subtype 2||Immunoglobulin-like domain||Immunoglobulin V-set domain||Immunoglobulin subtype	25463693	25477534	-	5686	upstream
XLOC_039500	--	Novel_lncRNA	25483221	25489508	-	ENSMUST00000149349	ENSMUSG00000003123	Lipe	Alpha/Beta hydrolase fold||Hormone-sensitive lipase, N-terminal||Lipase, GDXG, active site||Alpha/beta hydrolase fold-3||-	25379661	25398710	-	84510	upstream
XLOC_039500	--	Novel_lncRNA	25483221	25489508	-	ENSMUST00000206861	ENSMUSG00000003123	Lipe	Alpha/Beta hydrolase fold||Hormone-sensitive lipase, N-terminal||Lipase, GDXG, active site||Alpha/beta hydrolase fold-3||-	25379661	25389224	-	93996	upstream
XLOC_039500	--	Novel_lncRNA	25483221	25489508	-	ENSMUST00000064862	ENSMUSG00000054385	Ceacam2	Immunoglobulin V-set domain||Immunoglobulin subtype||Immunoglobulin subtype 2||Immunoglobulin-like domain	25516042	25539857	-	26533	downstream
XLOC_039500	--	Novel_lncRNA	25483221	25489508	-	ENSMUST00000098668	ENSMUSG00000074272	Ceacam1	Immunoglobulin||Immunoglobulin subtype 2||Immunoglobulin-like domain||Immunoglobulin V-set domain||Immunoglobulin subtype	25463329	25477534	-	5686	upstream
XLOC_039500	--	Novel_lncRNA	25483221	25489508	-	ENSMUST00000003207	ENSMUSG00000003123	Lipe	Alpha/Beta hydrolase fold||Hormone-sensitive lipase, N-terminal||Lipase, GDXG, active site||Alpha/beta hydrolase fold-3||-	25379527	25396379	-	86841	upstream
XLOC_039500	--	Novel_lncRNA	25483221	25489508	-	ENSMUST00000054301	ENSMUSG00000003123	Lipe	Alpha/Beta hydrolase fold||Hormone-sensitive lipase, N-terminal||Lipase, GDXG, active site||Alpha/beta hydrolase fold-3||-	25379645	25390106	-	93114	upstream
XLOC_039500	--	Novel_lncRNA	25483221	25489508	-	ENSMUST00000044547	ENSMUSG00000054385	Ceacam2	Immunoglobulin V-set domain||Immunoglobulin subtype||Immunoglobulin subtype 2||Immunoglobulin-like domain	25516840	25539819	-	27331	downstream
XLOC_039500	--	Novel_lncRNA	25483221	25489508	-	ENSMUST00000105177	ENSMUSG00000003123	Lipe	Alpha/Beta hydrolase fold||Hormone-sensitive lipase, N-terminal||Lipase, GDXG, active site||Alpha/beta hydrolase fold-3||-	25397459	25398709	-	84511	upstream
XLOC_039500	--	Novel_lncRNA	25483221	25489508	-	ENSMUST00000206687	ENSMUSG00000074272	Ceacam1	Immunoglobulin||Immunoglobulin subtype 2||Immunoglobulin-like domain||Immunoglobulin V-set domain||Immunoglobulin subtype	25463693	25477534	-	5686	upstream
XLOC_039500	--	Novel_lncRNA	25483221	25489508	-	ENSMUST00000205698	ENSMUSG00000003123	Lipe	Alpha/Beta hydrolase fold||Hormone-sensitive lipase, N-terminal||Lipase, GDXG, active site||Alpha/beta hydrolase fold-3||-	25388561	25390477	-	92743	upstream
XLOC_039500	--	Novel_lncRNA	25483221	25489508	-	ENSMUST00000206171	ENSMUSG00000074272	Ceacam1	Immunoglobulin||Immunoglobulin subtype 2||Immunoglobulin-like domain||Immunoglobulin V-set domain||Immunoglobulin subtype	25464460	25477573	-	5647	upstream
XLOC_039500	--	Novel_lncRNA	25483221	25489508	-	ENSMUST00000098669	ENSMUSG00000074272	Ceacam1	Immunoglobulin||Immunoglobulin subtype 2||Immunoglobulin-like domain||Immunoglobulin V-set domain||Immunoglobulin subtype	25462513	25477573	-	5647	upstream
XLOC_039500	--	Novel_lncRNA	25483221	25489508	-	ENSMUST00000074040	ENSMUSG00000060188	Cxcl17	VEGF co-regulated chemokine 1	25400053	25412886	-	70334	upstream
XLOC_039500	--	Novel_lncRNA	25483221	25489508	-	ENSMUST00000066503	ENSMUSG00000054385	Ceacam2	Immunoglobulin V-set domain||Immunoglobulin subtype||Immunoglobulin subtype 2||Immunoglobulin-like domain	25516042	25539857	-	26533	downstream
ENSMUSG00000106547.1	B230303O12Rik	Annotated_lncRNA	146188620	146194809	-	ENSMUST00000035571	ENSMUSG00000061292	Cyp3a59	Cytochrome P450, E-class, group II||Cytochrome P450, conserved site||Cytochrome P450||Cytochrome P450, E-class, CYP3A	146079267	146113285	+	75334	downstream
ENSMUSG00000106547.1	B230303O12Rik	Annotated_lncRNA	146188620	146194809	-	ENSMUST00000159074	ENSMUSG00000029634	Rnf6	-||Zinc finger, RING-type	146211853	146220948	-	17043	downstream
ENSMUSG00000106547.1	B230303O12Rik	Annotated_lncRNA	146188620	146194809	-	ENSMUST00000161574	ENSMUSG00000029634	Rnf6	-||Zinc finger, RING-type	146211676	146221418	-	16866	downstream
ENSMUSG00000106547.1	B230303O12Rik	Annotated_lncRNA	146188620	146194809	-	ENSMUST00000199463	ENSMUSG00000104752	Gm5565	Ras-like guanine nucleotide exchange factor, N-terminal	146157802	146160539	-	28080	upstream
ENSMUSG00000106547.1	B230303O12Rik	Annotated_lncRNA	146188620	146194809	-	ENSMUST00000169407	ENSMUSG00000029634	Rnf6	-||Zinc finger, RING-type	146209196	146220901	-	14386	downstream
ENSMUSG00000106547.1	B230303O12Rik	Annotated_lncRNA	146188620	146194809	-	ENSMUST00000161652	ENSMUSG00000029635	Cdk8	Protein kinase-like domain||Serine/threonine/dual specificity protein kinase, catalytic domain||Protein kinase, ATP binding site||Protein kinase domain||Serine/threonine-protein kinase, active site	146231288	146292744	+	36478	upstream
ENSMUSG00000106547.1	B230303O12Rik	Annotated_lncRNA	146188620	146194809	-	ENSMUST00000031640	ENSMUSG00000029635	Cdk8	Protein kinase-like domain||Serine/threonine/dual specificity protein kinase, catalytic domain||Protein kinase, ATP binding site||Protein kinase domain||Serine/threonine-protein kinase, active site	146231288	146302874	+	36478	upstream
ENSMUSG00000106547.1	B230303O12Rik	Annotated_lncRNA	146188620	146194809	-	ENSMUST00000073721	ENSMUSG00000095040	1700001J03Rik	Ras-like guanine nucleotide exchange factor, N-terminal	146182441	146185304	-	3315	upstream
ENSMUSG00000106547.1	B230303O12Rik	Annotated_lncRNA	146188620	146194809	-	ENSMUST00000174320	ENSMUSG00000096798	Gm6309	Ras-like guanine nucleotide exchange factor, N-terminal	146167976	146170721	-	17898	upstream
ENSMUSG00000106547.1	B230303O12Rik	Annotated_lncRNA	146188620	146194809	-	ENSMUST00000159467	ENSMUSG00000029635	Cdk8	Protein kinase-like domain||Serine/threonine/dual specificity protein kinase, catalytic domain||Protein kinase, ATP binding site||Protein kinase domain||Serine/threonine-protein kinase, active site	146231385	146271664	+	36575	upstream
ENSMUSG00000106547.1	B230303O12Rik	Annotated_lncRNA	146188620	146194809	-	ENSMUST00000067837	ENSMUSG00000029634	Rnf6	-||Zinc finger, RING-type	146209957	146220976	-	15147	downstream
ENSMUSG00000106547.1	B230303O12Rik	Annotated_lncRNA	146188620	146194809	-	ENSMUST00000161859	ENSMUSG00000029634	Rnf6	-||Zinc finger, RING-type	146209192	146221555	-	14382	downstream
ENSMUSG00000106547.1	B230303O12Rik	Annotated_lncRNA	146188620	146194809	-	ENSMUST00000161181	ENSMUSG00000029635	Cdk8	Protein kinase-like domain||Serine/threonine/dual specificity protein kinase, catalytic domain||Protein kinase, ATP binding site||Protein kinase domain||Serine/threonine-protein kinase, active site	146231250	146302831	+	36440	upstream
ENSMUSG00000106547.1	B230303O12Rik	Annotated_lncRNA	146188620	146194809	-	ENSMUST00000161331	ENSMUSG00000029634	Rnf6	-||Zinc finger, RING-type	146211704	146220935	-	16894	downstream
ENSMUSG00000106547.1	B230303O12Rik	Annotated_lncRNA	146188620	146194809	-	ENSMUST00000162219	ENSMUSG00000029634	Rnf6	-||Zinc finger, RING-type	146211303	146217989	-	16493	downstream
ENSMUSG00000085541.1	Gm16010	Annotated_lncRNA	97015966	97022043	+	ENSMUST00000124250	ENSMUSG00000032449	Slc25a36	Mitochondrial substrate/solute carrier||Mitochondrial carrier protein	97089702	97100220	-	67658	downstream
ENSMUSG00000085541.1	Gm16010	Annotated_lncRNA	97015966	97022043	+	ENSMUST00000055433	ENSMUSG00000046997	Spsb4	SPRY domain||B30.2/SPRY domain||Concanavalin A-like lectin/glucanase domain||SOCS box domain	96943482	97018843	-	-2878	antisense
ENSMUSG00000085541.1	Gm16010	Annotated_lncRNA	97015966	97022043	+	ENSMUST00000085206	ENSMUSG00000032449	Slc25a36	Mitochondrial substrate/solute carrier||Mitochondrial carrier protein	97074961	97111157	-	52917	downstream
ENSMUSG00000085541.1	Gm16010	Annotated_lncRNA	97015966	97022043	+	ENSMUST00000035024	ENSMUSG00000032449	Slc25a36	Mitochondrial substrate/solute carrier||Mitochondrial carrier protein	97075565	97084470	-	53521	downstream
ENSMUSG00000087611.1	4930458D05Rik	Annotated_lncRNA	100840797	100847167	-	ENSMUST00000055245	ENSMUSG00000035234	Fam175a	FAM175 family||FAM175 family, BRCA1-A complex, Abraxas subunit||-	100805192	100820965	-	19831	upstream
ENSMUSG00000087611.1	4930458D05Rik	Annotated_lncRNA	100840797	100847167	-	ENSMUST00000133845	ENSMUSG00000035266	Helq	Helicase superfamily 1/2, ATP-binding domain||DEAD/DEAH box helicase domain||P-loop containing nucleoside triphosphate hydrolase||-||Helicase, C-terminal	100762447	100798468	-	42328	upstream
ENSMUSG00000087611.1	4930458D05Rik	Annotated_lncRNA	100840797	100847167	-	ENSMUST00000016977	ENSMUSG00000016833	Mrps18c	Ribosomal protein S18, conserved site||Ribosomal protein S18||-	100798627	100804471	+	36325	downstream
ENSMUSG00000087611.1	4930458D05Rik	Annotated_lncRNA	100840797	100847167	-	ENSMUST00000112898	ENSMUSG00000016833	Mrps18c	Ribosomal protein S18, conserved site||Ribosomal protein S18||-	100798737	100804461	+	36335	downstream
ENSMUSG00000087611.1	4930458D05Rik	Annotated_lncRNA	100840797	100847167	-	ENSMUST00000145612	ENSMUSG00000029314	Agpat9	-||Phospholipid/glycerol acyltransferase	100846417	100846850	+	-434	antisense
ENSMUSG00000087611.1	4930458D05Rik	Annotated_lncRNA	100840797	100847167	-	ENSMUST00000144623	ENSMUSG00000029314	Agpat9	-||Phospholipid/glycerol acyltransferase	100845713	100846810	+	-1098	antisense
ENSMUSG00000087611.1	4930458D05Rik	Annotated_lncRNA	100840797	100847167	-	ENSMUST00000112887	ENSMUSG00000029314	Agpat9	-||Phospholipid/glycerol acyltransferase	100846130	100899099	+	-1038	antisense
ENSMUSG00000087611.1	4930458D05Rik	Annotated_lncRNA	100840797	100847167	-	ENSMUST00000044684	ENSMUSG00000035266	Helq	Helicase superfamily 1/2, ATP-binding domain||DEAD/DEAH box helicase domain||P-loop containing nucleoside triphosphate hydrolase||-||Helicase, C-terminal	100762145	100798598	-	42198	upstream
ENSMUSG00000087611.1	4930458D05Rik	Annotated_lncRNA	100840797	100847167	-	ENSMUST00000112901	ENSMUSG00000016833	Mrps18c	Ribosomal protein S18, conserved site||Ribosomal protein S18||-	100798747	100804471	+	36325	downstream
ENSMUSG00000087611.1	4930458D05Rik	Annotated_lncRNA	100840797	100847167	-	ENSMUST00000117364	ENSMUSG00000035234	Fam175a	FAM175 family||FAM175 family, BRCA1-A complex, Abraxas subunit||-	100805203	100820940	-	19856	upstream
ENSMUSG00000087611.1	4930458D05Rik	Annotated_lncRNA	100840797	100847167	-	ENSMUST00000092990	ENSMUSG00000029314	Agpat9	-||Phospholipid/glycerol acyltransferase	100846364	100899102	+	-804	antisense
ENSMUSG00000087611.1	4930458D05Rik	Annotated_lncRNA	100840797	100847167	-	ENSMUST00000031255	ENSMUSG00000029314	Agpat9	-||Phospholipid/glycerol acyltransferase	100846219	100899099	+	-949	antisense
XLOC_013968	--	Novel_lncRNA	75658866	75671074	-	ENSMUST00000035243	ENSMUSG00000034913	Spert	Chibby family	75582834	75591985	-	66880	upstream
XLOC_013968	--	Novel_lncRNA	75658866	75671074	-	ENSMUST00000169658	ENSMUSG00000034913	Spert	Chibby family	75582834	75593116	-	65749	upstream
XLOC_013968	--	Novel_lncRNA	75658866	75671074	-	ENSMUST00000049168	ENSMUSG00000034893	Cog3	Conserved oligomeric Golgi complex, subunit 3	75702351	75754493	-	31276	downstream
XLOC_013968	--	Novel_lncRNA	75658866	75671074	-	ENSMUST00000022579	ENSMUSG00000022002	Erich6b	-	75642259	75667137	+	-8272	antisense
XLOC_013968	--	Novel_lncRNA	75658866	75671074	-	ENSMUST00000165569	ENSMUSG00000034913	Spert	Chibby family	75582834	75591985	-	66880	upstream
XLOC_013968	--	Novel_lncRNA	75658866	75671074	-	ENSMUST00000164082	ENSMUSG00000034913	Spert	Chibby family	75582834	75593116	-	65749	upstream
XLOC_013968	--	Novel_lncRNA	75658866	75671074	-	ENSMUST00000022580	ENSMUSG00000022003	Slc25a30	Mitochondrial carrier protein||Mitochondrial substrate/solute carrier	75761999	75787037	-	90924	downstream
XLOC_038894	--	Novel_lncRNA	140187135	140191807	+	ENSMUST00000026539	ENSMUSG00000025466	Fuom	D-ribose pyranase RbsD/L-fucose mutarotase FucU||RbsD-like domain	140099470	140102441	-	84693	upstream
XLOC_038894	--	Novel_lncRNA	140187135	140191807	+	ENSMUST00000026538	ENSMUSG00000025465	Echs1	Enoyl-CoA hydratase/isomerase, conserved site||Crotonase superfamily||ClpP/crotonase-like domain	140105710	140116476	-	70658	upstream
XLOC_038894	--	Novel_lncRNA	140187135	140191807	+	ENSMUST00000093984	ENSMUSG00000054672	5830411N06Rik	SRCR domain||SRCR-like domain	140247381	140299791	+	55573	upstream
XLOC_038894	--	Novel_lncRNA	140187135	140191807	+	ENSMUST00000164583	ENSMUSG00000054672	5830411N06Rik	SRCR domain||SRCR-like domain	140247378	140299791	+	55570	upstream
XLOC_038894	--	Novel_lncRNA	140187135	140191807	+	ENSMUST00000055890	ENSMUSG00000051051	Olfr523	G protein-coupled receptor, rhodopsin-like||GPCR, rhodopsin-like, 7TM||Olfactory receptor	140176061	140177116	+	10018	downstream
XLOC_038894	--	Novel_lncRNA	140187135	140191807	+	ENSMUST00000051943	ENSMUSG00000050366	Olfr524	GPCR, rhodopsin-like, 7TM||G protein-coupled receptor, rhodopsin-like||Olfactory receptor	140201743	140202800	-	9935	downstream
XLOC_038894	--	Novel_lncRNA	140187135	140191807	+	ENSMUST00000026537	ENSMUSG00000025464	Paox	Amine oxidase	140125657	140134334	+	52800	downstream
XLOC_038894	--	Novel_lncRNA	140187135	140191807	+	ENSMUST00000142105	ENSMUSG00000025466	Fuom	D-ribose pyranase RbsD/L-fucose mutarotase FucU||RbsD-like domain	140099470	140102376	-	84758	upstream
XLOC_038894	--	Novel_lncRNA	140187135	140191807	+	ENSMUST00000121115	ENSMUSG00000025466	Fuom	D-ribose pyranase RbsD/L-fucose mutarotase FucU||RbsD-like domain	140100557	140102406	-	84728	upstream
XLOC_038894	--	Novel_lncRNA	140187135	140191807	+	ENSMUST00000084460	ENSMUSG00000025461	Cd163l1	SRCR domain||SRCR-like domain	140218267	140231145	+	26459	upstream
XLOC_038894	--	Novel_lncRNA	140187135	140191807	+	ENSMUST00000059241	ENSMUSG00000045733	Sprn	Shadow of prion protein	140150628	140154877	-	32257	upstream
XLOC_038894	--	Novel_lncRNA	140187135	140191807	+	ENSMUST00000097967	ENSMUSG00000025464	Paox	Amine oxidase	140125708	140134334	+	52800	downstream
XLOC_038894	--	Novel_lncRNA	140187135	140191807	+	ENSMUST00000026540	ENSMUSG00000025467	Prap1	Proline-rich acidic protein 1	140093395	140097200	+	89934	downstream
XLOC_038894	--	Novel_lncRNA	140187135	140191807	+	ENSMUST00000036977	ENSMUSG00000039018	Mtg1	Circularly permuted (CP)-type guanine nucleotide-binding (G) domain||GTPase, MTG1||GTP binding domain||P-loop containing nucleoside triphosphate hydrolase	140137564	140150786	+	36348	downstream
XLOC_038894	--	Novel_lncRNA	140187135	140191807	+	ENSMUST00000135842	ENSMUSG00000025465	Echs1	Enoyl-CoA hydratase/isomerase, conserved site||Crotonase superfamily||ClpP/crotonase-like domain	140106084	140113007	-	74127	upstream
XLOC_038894	--	Novel_lncRNA	140187135	140191807	+	ENSMUST00000120034	ENSMUSG00000025466	Fuom	D-ribose pyranase RbsD/L-fucose mutarotase FucU||RbsD-like domain	140096770	140102403	-	84731	upstream
XLOC_038894	--	Novel_lncRNA	140187135	140191807	+	ENSMUST00000050585	ENSMUSG00000051180	Olfr522	Olfactory receptor||GPCR, rhodopsin-like, 7TM||G protein-coupled receptor, rhodopsin-like	140161939	140163014	-	24120	upstream
XLOC_038894	--	Novel_lncRNA	140187135	140191807	+	ENSMUST00000128527	ENSMUSG00000025466	Fuom	D-ribose pyranase RbsD/L-fucose mutarotase FucU||RbsD-like domain	140099889	140102344	-	84790	upstream
XLOC_038894	--	Novel_lncRNA	140187135	140191807	+	ENSMUST00000059882	ENSMUSG00000054672	5830411N06Rik	SRCR domain||SRCR-like domain	140247301	140297641	+	55493	upstream
XLOC_023892	--	Novel_lncRNA	75810787	75815695	-	ENSMUST00000176056	ENSMUSG00000042410	Agps	FAD-linked oxidase, C-terminal||FAD-linked oxidase-like, C-terminal||-||FAD linked oxidase, N-terminal||FAD-binding, type 2	75868383	75877963	+	52687	upstream
XLOC_023892	--	Novel_lncRNA	75810787	75815695	-	ENSMUST00000175646	ENSMUSG00000042410	Agps	FAD-linked oxidase, C-terminal||FAD-linked oxidase-like, C-terminal||-||FAD linked oxidase, N-terminal||FAD-binding, type 2	75832505	75926078	+	16809	upstream
XLOC_023892	--	Novel_lncRNA	75810787	75815695	-	ENSMUST00000111952	ENSMUSG00000042410	Agps	FAD-linked oxidase, C-terminal||FAD-linked oxidase-like, C-terminal||-||FAD linked oxidase, N-terminal||FAD-binding, type 2	75832189	75895208	+	16493	upstream
XLOC_023892	--	Novel_lncRNA	75810787	75815695	-	ENSMUST00000047232	ENSMUSG00000042410	Agps	FAD-linked oxidase, C-terminal||FAD-linked oxidase-like, C-terminal||-||FAD linked oxidase, N-terminal||FAD-binding, type 2	75832177	75931350	+	16481	upstream
ENSMUSG00000099146.7	0610031O16Rik	Annotated_lncRNA	138229068	138240405	-	ENSMUST00000159622	ENSMUSG00000004127	Trmt10a	tRNA methyltransferase TRM10-type domain||tRNA (guanine(9)-N(1))-methyltransferase TRM10||-||tRNA methyltransferase TRMD/TRM10-type domain	138143799	138148362	+	80705	downstream
ENSMUSG00000099146.7	0610031O16Rik	Annotated_lncRNA	138229068	138240405	-	ENSMUST00000012186	ENSMUSG00000012042	4930579F01Rik	-	138164078	138186673	-	42394	upstream
ENSMUSG00000099146.7	0610031O16Rik	Annotated_lncRNA	138229068	138240405	-	ENSMUST00000029805	ENSMUSG00000028158	Mttp	Lipid transport protein, N-terminal||Lipid transport protein, beta-sheet shell	138089854	138131377	-	97690	upstream
ENSMUSG00000099146.7	0610031O16Rik	Annotated_lncRNA	138229068	138240405	-	ENSMUST00000106247	ENSMUSG00000053054	Adh6a	Alcohol dehydrogenase, C-terminal||GroES-like||Alcohol dehydrogenase, zinc-type, conserved site||Alcohol dehydrogenase, N-terminal||Polyketide synthase, enoylreductase domain	138313286	138331134	+	72880	upstream
ENSMUSG00000099146.7	0610031O16Rik	Annotated_lncRNA	138229068	138240405	-	ENSMUST00000004232	ENSMUSG00000074207	Adh1	Alcohol dehydrogenase, C-terminal||Alcohol dehydrogenase, N-terminal||Alcohol dehydrogenase, zinc-type, conserved site||GroES-like||Polyketide synthase, enoylreductase domain||-	138277494	138290698	+	37088	upstream
ENSMUSG00000099146.7	0610031O16Rik	Annotated_lncRNA	138229068	138240405	-	ENSMUST00000098580	ENSMUSG00000028158	Mttp	Lipid transport protein, N-terminal||Lipid transport protein, beta-sheet shell	138091055	138143388	-	85679	upstream
ENSMUSG00000099146.7	0610031O16Rik	Annotated_lncRNA	138229068	138240405	-	ENSMUST00000162864	ENSMUSG00000004127	Trmt10a	tRNA methyltransferase TRM10-type domain||tRNA (guanine(9)-N(1))-methyltransferase TRM10||-||tRNA methyltransferase TRMD/TRM10-type domain	138143517	138159818	+	69249	downstream
ENSMUSG00000099146.7	0610031O16Rik	Annotated_lncRNA	138229068	138240405	-	ENSMUST00000040321	ENSMUSG00000004127	Trmt10a	tRNA methyltransferase TRM10-type domain||tRNA (guanine(9)-N(1))-methyltransferase TRM10||-||tRNA methyltransferase TRMD/TRM10-type domain	138143448	138159821	+	69246	downstream
ENSMUSG00000099146.7	0610031O16Rik	Annotated_lncRNA	138229068	138240405	-	ENSMUST00000161141	ENSMUSG00000004127	Trmt10a	tRNA methyltransferase TRM10-type domain||tRNA (guanine(9)-N(1))-methyltransferase TRM10||-||tRNA methyltransferase TRMD/TRM10-type domain	138143910	138150476	+	78591	downstream
ENSMUSG00000099146.7	0610031O16Rik	Annotated_lncRNA	138229068	138240405	-	ENSMUST00000199293	ENSMUSG00000012042	4930579F01Rik	-	138164135	138186713	-	42354	upstream
ENSMUSG00000099146.7	0610031O16Rik	Annotated_lncRNA	138229068	138240405	-	ENSMUST00000013455	ENSMUSG00000053054	Adh6a	Alcohol dehydrogenase, C-terminal||GroES-like||Alcohol dehydrogenase, zinc-type, conserved site||Alcohol dehydrogenase, N-terminal||Polyketide synthase, enoylreductase domain	138313286	138330415	+	72880	upstream
ENSMUSG00000099146.7	0610031O16Rik	Annotated_lncRNA	138229068	138240405	-	ENSMUST00000159481	ENSMUSG00000004127	Trmt10a	tRNA methyltransferase TRM10-type domain||tRNA (guanine(9)-N(1))-methyltransferase TRM10||-||tRNA methyltransferase TRMD/TRM10-type domain	138143861	138148464	+	80603	downstream
ENSMUSG00000099146.7	0610031O16Rik	Annotated_lncRNA	138229068	138240405	-	ENSMUST00000090171	ENSMUSG00000055301	Adh7	Polyketide synthase, enoylreductase domain||GroES-like||Alcohol dehydrogenase, zinc-type, conserved site||Alcohol dehydrogenase, N-terminal||Alcohol dehydrogenase, C-terminal	138217760	138233382	+	-4315	antisense
ENSMUSG00000078706.4	Gm53	Annotated_lncRNA	96251644	96264698	+	ENSMUST00000100523	ENSMUSG00000075588	Hoxb2	Homeobox, conserved site||Homeodomain-like||Homeodomain, metazoa||Homeobox domain||Homeobox protein, antennapedia type, conserved site	96351631	96354012	+	86932	upstream
ENSMUSG00000078706.4	Gm53	Annotated_lncRNA	96251644	96264698	+	ENSMUST00000062709	ENSMUSG00000049604	Hoxb13	Homeobox, conserved site||Homeobox domain||Homeodomain-like||Homeobox protein Hox1A3 N-terminal	96194316	96197447	+	54196	downstream
ENSMUSG00000078706.4	Gm53	Annotated_lncRNA	96251644	96264698	+	ENSMUST00000000010	ENSMUSG00000020875	Hoxb9	Homeodomain, metazoa||Homeobox domain||Homeodomain-like||Homeobox protein Hox9||Homeobox, conserved site||Hox9, N-terminal activation domain	96271457	96276595	+	6758	upstream
ENSMUSG00000078706.4	Gm53	Annotated_lncRNA	96251644	96264698	+	ENSMUST00000125410	ENSMUSG00000056648	Hoxb8	Helix-turn-helix motif||Homeobox, conserved site||Homeodomain, metazoa||Homeobox protein, antennapedia type, conserved site||Homeodomain-like||Homeobox domain||Homeobox protein, antennapedia type	96282556	96284315	+	17857	upstream
ENSMUSG00000078706.4	Gm53	Annotated_lncRNA	96251644	96264698	+	ENSMUST00000174042	ENSMUSG00000020875	Hoxb9	Homeodomain, metazoa||Homeobox domain||Homeodomain-like||Homeobox protein Hox9||Homeobox, conserved site||Hox9, N-terminal activation domain	96271523	96276595	+	6824	upstream
ENSMUSG00000078706.4	Gm53	Annotated_lncRNA	96251644	96264698	+	ENSMUST00000049352	ENSMUSG00000038721	Hoxb7	Homeobox protein, antennapedia type||Homeobox domain||Homeodomain, metazoa||Homeodomain-like||Homeobox protein, antennapedia type, conserved site||Homeobox, conserved site	96286623	96290162	+	21924	upstream
ENSMUSG00000078706.4	Gm53	Annotated_lncRNA	96251644	96264698	+	ENSMUST00000049241	ENSMUSG00000038692	Hoxb4	Homeobox, conserved site||Homeobox protein, antennapedia type||Homeodomain, metazoa||Homeodomain-like||Homeobox domain||Homeobox protein, antennapedia type, conserved site	96318267	96321638	+	53568	upstream
ENSMUSG00000078706.4	Gm53	Annotated_lncRNA	96251644	96264698	+	ENSMUST00000049272	ENSMUSG00000038700	Hoxb5	Homeobox domain||Homeodomain, metazoa||Homeodomain-like||Homeobox protein, antennapedia type, conserved site||Homeobox protein, antennapedia type||Homeobox, conserved site	96303512	96306120	+	38813	upstream
ENSMUSG00000078706.4	Gm53	Annotated_lncRNA	96251644	96264698	+	ENSMUST00000000704	ENSMUSG00000000690	Hoxb6	Homeobox protein, antennapedia type||Homeodomain, metazoa||Homeobox protein, antennapedia type, conserved site||Homeodomain-like||Homeobox domain||Homeobox, conserved site	96299171	96301568	+	34472	upstream
ENSMUSG00000078706.4	Gm53	Annotated_lncRNA	96251644	96264698	+	ENSMUST00000093944	ENSMUSG00000048763	Hoxb3	-||Homeobox, conserved site||Homeodomain, metazoa||Homeobox domain||Homeodomain-like||Homeobox protein, antennapedia type, conserved site||Domain of unknown function DUF4074	96323326	96347930	+	58627	upstream
ENSMUSG00000078706.4	Gm53	Annotated_lncRNA	96251644	96264698	+	ENSMUST00000168043	ENSMUSG00000056648	Hoxb8	Helix-turn-helix motif||Homeobox, conserved site||Homeodomain, metazoa||Homeobox protein, antennapedia type, conserved site||Homeodomain-like||Homeobox domain||Homeobox protein, antennapedia type	96282725	96284693	+	18026	upstream
ENSMUSG00000078706.4	Gm53	Annotated_lncRNA	96251644	96264698	+	ENSMUST00000123091	ENSMUSG00000048763	Hoxb3	-||Homeobox, conserved site||Homeodomain, metazoa||Homeobox domain||Homeodomain-like||Homeobox protein, antennapedia type, conserved site||Domain of unknown function DUF4074	96328062	96344303	+	63363	upstream
ENSMUSG00000078706.4	Gm53	Annotated_lncRNA	96251644	96264698	+	ENSMUST00000052650	ENSMUSG00000056648	Hoxb8	Helix-turn-helix motif||Homeobox, conserved site||Homeodomain, metazoa||Homeobox protein, antennapedia type, conserved site||Homeodomain-like||Homeobox domain||Homeobox protein, antennapedia type	96281905	96285315	+	17206	upstream
ENSMUSG00000078706.4	Gm53	Annotated_lncRNA	96251644	96264698	+	ENSMUST00000167258	ENSMUSG00000038756	Ttll6	Tubulin-tyrosine ligase/Tubulin polyglutamylase	96133786	96165451	+	86192	downstream
ENSMUSG00000078706.4	Gm53	Annotated_lncRNA	96251644	96264698	+	ENSMUST00000107680	ENSMUSG00000038756	Ttll6	Tubulin-tyrosine ligase/Tubulin polyglutamylase	96134219	96165451	+	86192	downstream
ENSMUSG00000078706.4	Gm53	Annotated_lncRNA	96251644	96264698	+	ENSMUST00000173432	ENSMUSG00000000690	Hoxb6	Homeobox protein, antennapedia type||Homeodomain, metazoa||Homeobox protein, antennapedia type, conserved site||Homeodomain-like||Homeobox domain||Homeobox, conserved site	96292476	96301569	+	27777	upstream
ENSMUSG00000078706.4	Gm53	Annotated_lncRNA	96251644	96264698	+	ENSMUST00000055334	ENSMUSG00000048763	Hoxb3	-||Homeobox, conserved site||Homeodomain, metazoa||Homeobox domain||Homeodomain-like||Homeobox protein, antennapedia type, conserved site||Domain of unknown function DUF4074	96343769	96346507	+	79070	upstream
ENSMUSG00000097819.1	Gm26813	Annotated_lncRNA	59488480	59492605	-	ENSMUST00000114246	ENSMUSG00000041075	Fzd7	GPCR, family 2-like||Frizzled domain||Frizzled protein	59482424	59486955	+	1524	downstream
ENSMUSG00000097819.1	Gm26813	Annotated_lncRNA	59488480	59492605	-	ENSMUST00000114243	ENSMUSG00000047361	Gm973	-	59516264	59634509	+	23658	upstream
ENSMUSG00000097819.1	Gm26813	Annotated_lncRNA	59488480	59492605	-	ENSMUST00000186434	ENSMUSG00000047361	Gm973	-	59524294	59526971	+	31688	upstream
XLOC_044713	--	Novel_lncRNA	44664309	44672545	-	ENSMUST00000138356	ENSMUSG00000048537	Phldb1	-||Pleckstrin homology domain||SMAD/FHA domain	44686308	44728079	-	13762	downstream
XLOC_044713	--	Novel_lncRNA	44664309	44672545	-	ENSMUST00000071219	ENSMUSG00000032098	Treh	Glycoside hydrolase, family 37, conserved site||Glycoside hydrolase, family 37||Six-hairpin glycosidase-like	44673249	44686305	+	703	upstream
XLOC_044713	--	Novel_lncRNA	44664309	44672545	-	ENSMUST00000123406	ENSMUSG00000048537	Phldb1	-||Pleckstrin homology domain||SMAD/FHA domain	44716124	44721424	-	43578	downstream
XLOC_044713	--	Novel_lncRNA	44664309	44672545	-	ENSMUST00000144251	ENSMUSG00000048537	Phldb1	-||Pleckstrin homology domain||SMAD/FHA domain	44686308	44713240	-	13762	downstream
XLOC_044713	--	Novel_lncRNA	44664309	44672545	-	ENSMUST00000148344	ENSMUSG00000048537	Phldb1	-||Pleckstrin homology domain||SMAD/FHA domain	44686310	44716380	-	13764	downstream
XLOC_044713	--	Novel_lncRNA	44664309	44672545	-	ENSMUST00000134465	ENSMUSG00000048537	Phldb1	-||Pleckstrin homology domain||SMAD/FHA domain	44686310	44728100	-	13764	downstream
XLOC_044713	--	Novel_lncRNA	44664309	44672545	-	ENSMUST00000135436	ENSMUSG00000048537	Phldb1	-||Pleckstrin homology domain||SMAD/FHA domain	44686310	44701733	-	13764	downstream
XLOC_044713	--	Novel_lncRNA	44664309	44672545	-	ENSMUST00000034607	ENSMUSG00000032096	Arcn1	Longin-like domain||Mu homology domain||AP complex, mu/sigma subunit	44741564	44767845	-	69018	downstream
XLOC_044713	--	Novel_lncRNA	44664309	44672545	-	ENSMUST00000147495	ENSMUSG00000048537	Phldb1	-||Pleckstrin homology domain||SMAD/FHA domain	44686304	44728100	-	13758	downstream
XLOC_044713	--	Novel_lncRNA	44664309	44672545	-	ENSMUST00000034609	ENSMUSG00000032098	Treh	Glycoside hydrolase, family 37, conserved site||Glycoside hydrolase, family 37||Six-hairpin glycosidase-like	44673233	44686305	+	687	upstream
XLOC_044713	--	Novel_lncRNA	44664309	44672545	-	ENSMUST00000170489	ENSMUSG00000032097	Ddx6	ATP-dependent RNA helicase DEAD-box, conserved site||RNA helicase, DEAD-box type, Q motif||P-loop containing nucleoside triphosphate hydrolase||Helicase, C-terminal||Helicase superfamily 1/2, ATP-binding domain||DEAD/DEAH box helicase domain	44604892	44640731	+	23577	downstream
XLOC_044713	--	Novel_lncRNA	44664309	44672545	-	ENSMUST00000154723	ENSMUSG00000048537	Phldb1	-||Pleckstrin homology domain||SMAD/FHA domain	44700962	44710946	-	28416	downstream
XLOC_044713	--	Novel_lncRNA	44664309	44672545	-	ENSMUST00000034611	ENSMUSG00000048537	Phldb1	-||Pleckstrin homology domain||SMAD/FHA domain	44686308	44735198	-	13762	downstream
XLOC_044713	--	Novel_lncRNA	44664309	44672545	-	ENSMUST00000128326	ENSMUSG00000048537	Phldb1	-||Pleckstrin homology domain||SMAD/FHA domain	44686308	44715623	-	13762	downstream
XLOC_044713	--	Novel_lncRNA	44664309	44672545	-	ENSMUST00000148929	ENSMUSG00000048537	Phldb1	-||Pleckstrin homology domain||SMAD/FHA domain	44716294	44721387	-	43748	downstream
XLOC_044713	--	Novel_lncRNA	44664309	44672545	-	ENSMUST00000156918	ENSMUSG00000048537	Phldb1	-||Pleckstrin homology domain||SMAD/FHA domain	44686308	44713265	-	13762	downstream
XLOC_044713	--	Novel_lncRNA	44664309	44672545	-	ENSMUST00000123310	ENSMUSG00000048537	Phldb1	-||Pleckstrin homology domain||SMAD/FHA domain	44697734	44704108	-	25188	downstream
XLOC_031229	--	Novel_lncRNA	17276343	17335369	+	ENSMUST00000166086	ENSMUSG00000091827	Speer4f2	Domain of unknown function DUF622	17373180	17378028	+	37810	upstream
XLOC_004689	--	Novel_lncRNA	77013804	77030295	-	ENSMUST00000133059	ENSMUSG00000001436	Slc19a1	Reduced folate carrier||Major facilitator superfamily domain||Folate transporter 1	77032271	77041847	+	1975	upstream
XLOC_004689	--	Novel_lncRNA	77013804	77030295	-	ENSMUST00000001148	ENSMUSG00000001120	Pcbp3	K Homology domain, type 1||K Homology domain	76761857	76961788	-	52015	upstream
XLOC_004689	--	Novel_lncRNA	77013804	77030295	-	ENSMUST00000130703	ENSMUSG00000001436	Slc19a1	Reduced folate carrier||Major facilitator superfamily domain||Folate transporter 1	77033281	77042956	+	2985	upstream
XLOC_004689	--	Novel_lncRNA	77013804	77030295	-	ENSMUST00000131031	ENSMUSG00000001436	Slc19a1	Reduced folate carrier||Major facilitator superfamily domain||Folate transporter 1	77042791	77061002	+	12495	upstream
XLOC_004689	--	Novel_lncRNA	77013804	77030295	-	ENSMUST00000136925	ENSMUSG00000001436	Slc19a1	Reduced folate carrier||Major facilitator superfamily domain||Folate transporter 1	77033268	77046268	+	2972	upstream
XLOC_004689	--	Novel_lncRNA	77013804	77030295	-	ENSMUST00000099552	ENSMUSG00000074919	Gm10787	-	77011995	77022214	+	-8411	antisense
XLOC_004689	--	Novel_lncRNA	77013804	77030295	-	ENSMUST00000156009	ENSMUSG00000001435	Col18a1	Concanavalin A-like lectin/glucanase domain||Frizzled domain||Domain of unknown function DUF959, collagen XVIII, N-terminal||Collagenase NC10/endostatin||-||Collagen triple helix repeat||Laminin G domain||C-type lectin fold	77080725	77089428	-	50429	downstream
XLOC_004689	--	Novel_lncRNA	77013804	77030295	-	ENSMUST00000132984	ENSMUSG00000001436	Slc19a1	Reduced folate carrier||Major facilitator superfamily domain||Folate transporter 1	77033319	77042330	+	3023	upstream
XLOC_004689	--	Novel_lncRNA	77013804	77030295	-	ENSMUST00000105409	ENSMUSG00000001435	Col18a1	Concanavalin A-like lectin/glucanase domain||Frizzled domain||Domain of unknown function DUF959, collagen XVIII, N-terminal||Collagenase NC10/endostatin||-||Collagen triple helix repeat||Laminin G domain||C-type lectin fold	77053016	77113705	-	22720	downstream
XLOC_004689	--	Novel_lncRNA	77013804	77030295	-	ENSMUST00000136150	ENSMUSG00000001436	Slc19a1	Reduced folate carrier||Major facilitator superfamily domain||Folate transporter 1	77032241	77042361	+	1945	upstream
XLOC_004689	--	Novel_lncRNA	77013804	77030295	-	ENSMUST00000105410	ENSMUSG00000001436	Slc19a1	Reduced folate carrier||Major facilitator superfamily domain||Folate transporter 1	77033212	77050431	+	2916	upstream
XLOC_004689	--	Novel_lncRNA	77013804	77030295	-	ENSMUST00000105411	ENSMUSG00000001120	Pcbp3	K Homology domain, type 1||K Homology domain	76761860	76961887	-	51916	upstream
XLOC_004689	--	Novel_lncRNA	77013804	77030295	-	ENSMUST00000149744	ENSMUSG00000001435	Col18a1	Concanavalin A-like lectin/glucanase domain||Frizzled domain||Domain of unknown function DUF959, collagen XVIII, N-terminal||Collagenase NC10/endostatin||-||Collagen triple helix repeat||Laminin G domain||C-type lectin fold	77096309	77113946	-	66013	downstream
XLOC_004689	--	Novel_lncRNA	77013804	77030295	-	ENSMUST00000081654	ENSMUSG00000001435	Col18a1	Concanavalin A-like lectin/glucanase domain||Frizzled domain||Domain of unknown function DUF959, collagen XVIII, N-terminal||Collagenase NC10/endostatin||-||Collagen triple helix repeat||Laminin G domain||C-type lectin fold	77052178	77166548	-	21882	downstream
XLOC_004689	--	Novel_lncRNA	77013804	77030295	-	ENSMUST00000144234	ENSMUSG00000001436	Slc19a1	Reduced folate carrier||Major facilitator superfamily domain||Folate transporter 1	77032684	77050432	+	2388	upstream
XLOC_004689	--	Novel_lncRNA	77013804	77030295	-	ENSMUST00000072755	ENSMUSG00000001435	Col18a1	Concanavalin A-like lectin/glucanase domain||Frizzled domain||Domain of unknown function DUF959, collagen XVIII, N-terminal||Collagenase NC10/endostatin||-||Collagen triple helix repeat||Laminin G domain||C-type lectin fold	77052181	77113676	-	21885	downstream
XLOC_004689	--	Novel_lncRNA	77013804	77029837	-	ENSMUST00000133059	ENSMUSG00000001436	Slc19a1	Reduced folate carrier||Major facilitator superfamily domain||Folate transporter 1	77032271	77041847	+	2433	upstream
XLOC_004689	--	Novel_lncRNA	77013804	77029837	-	ENSMUST00000001148	ENSMUSG00000001120	Pcbp3	K Homology domain, type 1||K Homology domain	76761857	76961788	-	52015	upstream
XLOC_004689	--	Novel_lncRNA	77013804	77029837	-	ENSMUST00000130703	ENSMUSG00000001436	Slc19a1	Reduced folate carrier||Major facilitator superfamily domain||Folate transporter 1	77033281	77042956	+	3443	upstream
XLOC_004689	--	Novel_lncRNA	77013804	77029837	-	ENSMUST00000131031	ENSMUSG00000001436	Slc19a1	Reduced folate carrier||Major facilitator superfamily domain||Folate transporter 1	77042791	77061002	+	12953	upstream
XLOC_004689	--	Novel_lncRNA	77013804	77029837	-	ENSMUST00000136925	ENSMUSG00000001436	Slc19a1	Reduced folate carrier||Major facilitator superfamily domain||Folate transporter 1	77033268	77046268	+	3430	upstream
XLOC_004689	--	Novel_lncRNA	77013804	77029837	-	ENSMUST00000099552	ENSMUSG00000074919	Gm10787	-	77011995	77022214	+	-8411	antisense
XLOC_004689	--	Novel_lncRNA	77013804	77029837	-	ENSMUST00000156009	ENSMUSG00000001435	Col18a1	Concanavalin A-like lectin/glucanase domain||Frizzled domain||Domain of unknown function DUF959, collagen XVIII, N-terminal||Collagenase NC10/endostatin||-||Collagen triple helix repeat||Laminin G domain||C-type lectin fold	77080725	77089428	-	50887	downstream
XLOC_004689	--	Novel_lncRNA	77013804	77029837	-	ENSMUST00000132984	ENSMUSG00000001436	Slc19a1	Reduced folate carrier||Major facilitator superfamily domain||Folate transporter 1	77033319	77042330	+	3481	upstream
XLOC_004689	--	Novel_lncRNA	77013804	77029837	-	ENSMUST00000105409	ENSMUSG00000001435	Col18a1	Concanavalin A-like lectin/glucanase domain||Frizzled domain||Domain of unknown function DUF959, collagen XVIII, N-terminal||Collagenase NC10/endostatin||-||Collagen triple helix repeat||Laminin G domain||C-type lectin fold	77053016	77113705	-	23178	downstream
XLOC_004689	--	Novel_lncRNA	77013804	77029837	-	ENSMUST00000136150	ENSMUSG00000001436	Slc19a1	Reduced folate carrier||Major facilitator superfamily domain||Folate transporter 1	77032241	77042361	+	2403	upstream
XLOC_004689	--	Novel_lncRNA	77013804	77029837	-	ENSMUST00000105410	ENSMUSG00000001436	Slc19a1	Reduced folate carrier||Major facilitator superfamily domain||Folate transporter 1	77033212	77050431	+	3374	upstream
XLOC_004689	--	Novel_lncRNA	77013804	77029837	-	ENSMUST00000105411	ENSMUSG00000001120	Pcbp3	K Homology domain, type 1||K Homology domain	76761860	76961887	-	51916	upstream
XLOC_004689	--	Novel_lncRNA	77013804	77029837	-	ENSMUST00000149744	ENSMUSG00000001435	Col18a1	Concanavalin A-like lectin/glucanase domain||Frizzled domain||Domain of unknown function DUF959, collagen XVIII, N-terminal||Collagenase NC10/endostatin||-||Collagen triple helix repeat||Laminin G domain||C-type lectin fold	77096309	77113946	-	66471	downstream
XLOC_004689	--	Novel_lncRNA	77013804	77029837	-	ENSMUST00000081654	ENSMUSG00000001435	Col18a1	Concanavalin A-like lectin/glucanase domain||Frizzled domain||Domain of unknown function DUF959, collagen XVIII, N-terminal||Collagenase NC10/endostatin||-||Collagen triple helix repeat||Laminin G domain||C-type lectin fold	77052178	77166548	-	22340	downstream
XLOC_004689	--	Novel_lncRNA	77013804	77029837	-	ENSMUST00000144234	ENSMUSG00000001436	Slc19a1	Reduced folate carrier||Major facilitator superfamily domain||Folate transporter 1	77032684	77050432	+	2846	upstream
XLOC_004689	--	Novel_lncRNA	77013804	77029837	-	ENSMUST00000072755	ENSMUSG00000001435	Col18a1	Concanavalin A-like lectin/glucanase domain||Frizzled domain||Domain of unknown function DUF959, collagen XVIII, N-terminal||Collagenase NC10/endostatin||-||Collagen triple helix repeat||Laminin G domain||C-type lectin fold	77052181	77113676	-	22343	downstream
XLOC_031796	--	Novel_lncRNA	89245521	89254058	+	ENSMUST00000156238	ENSMUSG00000060961	Slc4a4	Band 3 cytoplasmic domain||Bicarbonate transporter, eukaryotic||Bicarbonate transporter, C-terminal||Phosphotransferase/anion transporter||Sodium bicarbonate cotransporter||-	88887299	89235794	+	9726	downstream
XLOC_031796	--	Novel_lncRNA	89245521	89254058	+	ENSMUST00000113218	ENSMUSG00000060961	Slc4a4	Band 3 cytoplasmic domain||Bicarbonate transporter, eukaryotic||Bicarbonate transporter, C-terminal||Phosphotransferase/anion transporter||Sodium bicarbonate cotransporter||-	88887297	89234867	+	10653	downstream
XLOC_031796	--	Novel_lncRNA	89245521	89254058	+	ENSMUST00000130041	ENSMUSG00000060961	Slc4a4	Band 3 cytoplasmic domain||Bicarbonate transporter, eukaryotic||Bicarbonate transporter, C-terminal||Phosphotransferase/anion transporter||Sodium bicarbonate cotransporter||-	89027966	89234861	+	10659	downstream
XLOC_031796	--	Novel_lncRNA	89245521	89254058	+	ENSMUST00000148750	ENSMUSG00000060961	Slc4a4	Band 3 cytoplasmic domain||Bicarbonate transporter, eukaryotic||Bicarbonate transporter, C-terminal||Phosphotransferase/anion transporter||Sodium bicarbonate cotransporter||-	88886818	89239653	+	5867	downstream
XLOC_004175	--	Novel_lncRNA	122626866	122631130	+	ENSMUST00000161487	ENSMUSG00000034613	Ppm1h	PPM-type phosphatase domain	122678778	122921974	+	47647	upstream
XLOC_004175	--	Novel_lncRNA	122626866	122631130	+	ENSMUST00000067918	ENSMUSG00000034613	Ppm1h	PPM-type phosphatase domain	122678782	122945795	+	47651	upstream
ENSMUSG00000099146.7	0610031O16Rik	Annotated_lncRNA	138210716	138239663	-	ENSMUST00000159622	ENSMUSG00000004127	Trmt10a	tRNA methyltransferase TRM10-type domain||tRNA (guanine(9)-N(1))-methyltransferase TRM10||-||tRNA methyltransferase TRMD/TRM10-type domain	138143799	138148362	+	62353	downstream
ENSMUSG00000099146.7	0610031O16Rik	Annotated_lncRNA	138210716	138239663	-	ENSMUST00000012186	ENSMUSG00000012042	4930579F01Rik	-	138164078	138186673	-	24042	upstream
ENSMUSG00000099146.7	0610031O16Rik	Annotated_lncRNA	138210716	138239663	-	ENSMUST00000029805	ENSMUSG00000028158	Mttp	Lipid transport protein, N-terminal||Lipid transport protein, beta-sheet shell	138089854	138131377	-	79338	upstream
ENSMUSG00000099146.7	0610031O16Rik	Annotated_lncRNA	138210716	138239663	-	ENSMUST00000106247	ENSMUSG00000053054	Adh6a	Alcohol dehydrogenase, C-terminal||GroES-like||Alcohol dehydrogenase, zinc-type, conserved site||Alcohol dehydrogenase, N-terminal||Polyketide synthase, enoylreductase domain	138313286	138331134	+	73622	upstream
ENSMUSG00000099146.7	0610031O16Rik	Annotated_lncRNA	138210716	138239663	-	ENSMUST00000004232	ENSMUSG00000074207	Adh1	Alcohol dehydrogenase, C-terminal||Alcohol dehydrogenase, N-terminal||Alcohol dehydrogenase, zinc-type, conserved site||GroES-like||Polyketide synthase, enoylreductase domain||-	138277494	138290698	+	37830	upstream
ENSMUSG00000099146.7	0610031O16Rik	Annotated_lncRNA	138210716	138239663	-	ENSMUST00000098580	ENSMUSG00000028158	Mttp	Lipid transport protein, N-terminal||Lipid transport protein, beta-sheet shell	138091055	138143388	-	67327	upstream
ENSMUSG00000099146.7	0610031O16Rik	Annotated_lncRNA	138210716	138239663	-	ENSMUST00000162864	ENSMUSG00000004127	Trmt10a	tRNA methyltransferase TRM10-type domain||tRNA (guanine(9)-N(1))-methyltransferase TRM10||-||tRNA methyltransferase TRMD/TRM10-type domain	138143517	138159818	+	50897	downstream
ENSMUSG00000099146.7	0610031O16Rik	Annotated_lncRNA	138210716	138239663	-	ENSMUST00000040321	ENSMUSG00000004127	Trmt10a	tRNA methyltransferase TRM10-type domain||tRNA (guanine(9)-N(1))-methyltransferase TRM10||-||tRNA methyltransferase TRMD/TRM10-type domain	138143448	138159821	+	50894	downstream
ENSMUSG00000099146.7	0610031O16Rik	Annotated_lncRNA	138210716	138239663	-	ENSMUST00000161141	ENSMUSG00000004127	Trmt10a	tRNA methyltransferase TRM10-type domain||tRNA (guanine(9)-N(1))-methyltransferase TRM10||-||tRNA methyltransferase TRMD/TRM10-type domain	138143910	138150476	+	60239	downstream
ENSMUSG00000099146.7	0610031O16Rik	Annotated_lncRNA	138210716	138239663	-	ENSMUST00000199293	ENSMUSG00000012042	4930579F01Rik	-	138164135	138186713	-	24002	upstream
ENSMUSG00000099146.7	0610031O16Rik	Annotated_lncRNA	138210716	138239663	-	ENSMUST00000013455	ENSMUSG00000053054	Adh6a	Alcohol dehydrogenase, C-terminal||GroES-like||Alcohol dehydrogenase, zinc-type, conserved site||Alcohol dehydrogenase, N-terminal||Polyketide synthase, enoylreductase domain	138313286	138330415	+	73622	upstream
ENSMUSG00000099146.7	0610031O16Rik	Annotated_lncRNA	138210716	138239663	-	ENSMUST00000159481	ENSMUSG00000004127	Trmt10a	tRNA methyltransferase TRM10-type domain||tRNA (guanine(9)-N(1))-methyltransferase TRM10||-||tRNA methyltransferase TRMD/TRM10-type domain	138143861	138148464	+	62251	downstream
ENSMUSG00000099146.7	0610031O16Rik	Annotated_lncRNA	138210716	138239663	-	ENSMUST00000090171	ENSMUSG00000055301	Adh7	Polyketide synthase, enoylreductase domain||GroES-like||Alcohol dehydrogenase, zinc-type, conserved site||Alcohol dehydrogenase, N-terminal||Alcohol dehydrogenase, C-terminal	138217760	138233382	+	-15623	antisense
ENSMUSG00000099413.1	Gm17767	Annotated_lncRNA	51507086	51512329	-	ENSMUST00000188204	ENSMUSG00000026107	Nabp1	Nucleic acid-binding, OB-fold||OB-fold nucleic acid binding domain, AA-tRNA synthetase-type	51470807	51478399	-	28686	upstream
ENSMUSG00000099413.1	Gm17767	Annotated_lncRNA	51507086	51512329	-	ENSMUST00000186684	ENSMUSG00000026107	Nabp1	Nucleic acid-binding, OB-fold||OB-fold nucleic acid binding domain, AA-tRNA synthetase-type	51469857	51478399	-	28686	upstream
ENSMUSG00000099413.1	Gm17767	Annotated_lncRNA	51507086	51512329	-	ENSMUST00000188051	ENSMUSG00000026107	Nabp1	Nucleic acid-binding, OB-fold||OB-fold nucleic acid binding domain, AA-tRNA synthetase-type	51471129	51478425	-	28660	upstream
ENSMUSG00000099413.1	Gm17767	Annotated_lncRNA	51507086	51512329	-	ENSMUST00000027279	ENSMUSG00000026107	Nabp1	Nucleic acid-binding, OB-fold||OB-fold nucleic acid binding domain, AA-tRNA synthetase-type	51469488	51478399	-	28686	upstream
ENSMUSG00000099413.1	Gm17767	Annotated_lncRNA	51507086	51512329	-	ENSMUST00000185534	ENSMUSG00000026107	Nabp1	Nucleic acid-binding, OB-fold||OB-fold nucleic acid binding domain, AA-tRNA synthetase-type	51471142	51478399	-	28686	upstream
ENSMUSG00000099587.1	Gm28967	Annotated_lncRNA	125186361	125186641	-	ENSMUST00000043848	ENSMUSG00000038252	Ncapd2	-||Condensin subunit 1||Armadillo-type fold||Condensin complex, subunit 1, N-terminal	125168007	125191701	-	-281	sense_overlapping
ENSMUSG00000099587.1	Gm28967	Annotated_lncRNA	125186361	125186641	-	ENSMUST00000119527	ENSMUSG00000038271	Iffo1	-	125145241	125161782	+	24578	downstream
ENSMUSG00000099587.1	Gm28967	Annotated_lncRNA	125186361	125186641	-	ENSMUST00000155261	ENSMUSG00000063870	Chd4	Zinc finger, PHD-type||Domain of unknown function DUF1086||DNA/RNA helicase, ATP-dependent, DEAH-box type, conserved site||Zinc finger, FYVE/PHD-type||Zinc finger, PHD-type, conserved site||Chromo/chromo shadow domain||-||Zinc finger, PHD-finger||Chromo domain-like||CHD, N-terminal||Domain of unknown function DUF1087||Helicase, C-terminal||P-loop containing nucleoside triphosphate hydrolase||Chro…	125096569	125100520	+	85840	downstream
ENSMUSG00000099587.1	Gm28967	Annotated_lncRNA	125186361	125186641	-	ENSMUST00000204185	ENSMUSG00000038279	Nop2	S-adenosyl-L-methionine-dependent methyltransferase||-||RNA (C5-cytosine) methyltransferase, NOP2||RNA (C5-cytosine) methyltransferase||Nop2p||Bacterial Fmu (Sun)/eukaryotic nucleolar NOL1/Nop2p, conserved site||SAM-dependent methyltransferase RsmB/NOP2-type||P120R	125132033	125134704	+	51656	downstream
ENSMUSG00000099587.1	Gm28967	Annotated_lncRNA	125186361	125186641	-	ENSMUST00000032486	ENSMUSG00000030336	Cd27	Tumour necrosis factor receptor 7||TNFR/NGFR cysteine-rich region	125232622	125237010	-	45980	downstream
ENSMUSG00000099587.1	Gm28967	Annotated_lncRNA	125186361	125186641	-	ENSMUST00000032487	ENSMUSG00000030337	Vamp1	Synaptobrevin||Synaptobrevin/Vesicle-associated membrane protein	125215551	125222306	+	28909	upstream
ENSMUSG00000099587.1	Gm28967	Annotated_lncRNA	125186361	125186641	-	ENSMUST00000032485	ENSMUSG00000030335	Mrpl51	Ribosomal protein L51, mitochondrial	125192165	125196269	+	5523	upstream
ENSMUSG00000099587.1	Gm28967	Annotated_lncRNA	125186361	125186641	-	ENSMUST00000112392	ENSMUSG00000063870	Chd4	Zinc finger, PHD-type||Domain of unknown function DUF1086||DNA/RNA helicase, ATP-dependent, DEAH-box type, conserved site||Zinc finger, FYVE/PHD-type||Zinc finger, PHD-type, conserved site||Chromo/chromo shadow domain||-||Zinc finger, PHD-finger||Chromo domain-like||CHD, N-terminal||Domain of unknown function DUF1087||Helicase, C-terminal||P-loop containing nucleoside triphosphate hydrolase||Chro…	125095981	125130585	+	55775	downstream
ENSMUSG00000099587.1	Gm28967	Annotated_lncRNA	125186361	125186641	-	ENSMUST00000112390	ENSMUSG00000063870	Chd4	Zinc finger, PHD-type||Domain of unknown function DUF1086||DNA/RNA helicase, ATP-dependent, DEAH-box type, conserved site||Zinc finger, FYVE/PHD-type||Zinc finger, PHD-type, conserved site||Chromo/chromo shadow domain||-||Zinc finger, PHD-finger||Chromo domain-like||CHD, N-terminal||Domain of unknown function DUF1087||Helicase, C-terminal||P-loop containing nucleoside triphosphate hydrolase||Chro…	125096162	125130591	+	55769	downstream
ENSMUSG00000099587.1	Gm28967	Annotated_lncRNA	125186361	125186641	-	ENSMUST00000117675	ENSMUSG00000038271	Iffo1	-	125145251	125161776	+	24584	downstream
ENSMUSG00000099587.1	Gm28967	Annotated_lncRNA	125186361	125186641	-	ENSMUST00000183272	ENSMUSG00000057666	Gapdh	Glyceraldehyde 3-phosphate dehydrogenase, NAD(P) binding domain||Glyceraldehyde-3-phosphate dehydrogenase, type I||Glyceraldehyde 3-phosphate dehydrogenase, active site||Glyceraldehyde 3-phosphate dehydrogenase, catalytic domain||Glyceraldehyde/Erythrose phosphate dehydrogenase family	125162064	125165576	-	20784	upstream
ENSMUSG00000099587.1	Gm28967	Annotated_lncRNA	125186361	125186641	-	ENSMUST00000189959	ENSMUSG00000038252	Ncapd2	-||Condensin subunit 1||Armadillo-type fold||Condensin complex, subunit 1, N-terminal	125185793	125191490	-	-281	sense_overlapping
ENSMUSG00000099587.1	Gm28967	Annotated_lncRNA	125186361	125186641	-	ENSMUST00000205223	ENSMUSG00000030337	Vamp1	Synaptobrevin||Synaptobrevin/Vesicle-associated membrane protein	125218574	125221652	+	31932	upstream
ENSMUSG00000099587.1	Gm28967	Annotated_lncRNA	125186361	125186641	-	ENSMUST00000124317	ENSMUSG00000063870	Chd4	Zinc finger, PHD-type||Domain of unknown function DUF1086||DNA/RNA helicase, ATP-dependent, DEAH-box type, conserved site||Zinc finger, FYVE/PHD-type||Zinc finger, PHD-type, conserved site||Chromo/chromo shadow domain||-||Zinc finger, PHD-finger||Chromo domain-like||CHD, N-terminal||Domain of unknown function DUF1087||Helicase, C-terminal||P-loop containing nucleoside triphosphate hydrolase||Chro…	125113569	125121942	+	64418	downstream
ENSMUSG00000099587.1	Gm28967	Annotated_lncRNA	125186361	125186641	-	ENSMUST00000182052	ENSMUSG00000057666	Gapdh	Glyceraldehyde 3-phosphate dehydrogenase, NAD(P) binding domain||Glyceraldehyde-3-phosphate dehydrogenase, type I||Glyceraldehyde 3-phosphate dehydrogenase, active site||Glyceraldehyde 3-phosphate dehydrogenase, catalytic domain||Glyceraldehyde/Erythrose phosphate dehydrogenase family	125163175	125165603	-	20757	upstream
ENSMUSG00000099587.1	Gm28967	Annotated_lncRNA	125186361	125186641	-	ENSMUST00000044200	ENSMUSG00000038279	Nop2	S-adenosyl-L-methionine-dependent methyltransferase||-||RNA (C5-cytosine) methyltransferase, NOP2||RNA (C5-cytosine) methyltransferase||Nop2p||Bacterial Fmu (Sun)/eukaryotic nucleolar NOL1/Nop2p, conserved site||SAM-dependent methyltransferase RsmB/NOP2-type||P120R	125131909	125144753	+	41607	downstream
ENSMUSG00000099587.1	Gm28967	Annotated_lncRNA	125186361	125186641	-	ENSMUST00000088246	ENSMUSG00000067702	Tuba3a	Tubulin/FtsZ, 2-layer sandwich domain||Tubulin||Tubulin/FtsZ, C-terminal||Alpha tubulin||Tubulin, conserved site||Tubulin/FtsZ, GTPase domain	125278274	125286042	-	91632	downstream
ENSMUSG00000099587.1	Gm28967	Annotated_lncRNA	125186361	125186641	-	ENSMUST00000100942	ENSMUSG00000030337	Vamp1	Synaptobrevin||Synaptobrevin/Vesicle-associated membrane protein	125215581	125222163	+	28939	upstream
ENSMUSG00000099587.1	Gm28967	Annotated_lncRNA	125186361	125186641	-	ENSMUST00000056889	ENSMUSG00000063870	Chd4	Zinc finger, PHD-type||Domain of unknown function DUF1086||DNA/RNA helicase, ATP-dependent, DEAH-box type, conserved site||Zinc finger, FYVE/PHD-type||Zinc finger, PHD-type, conserved site||Chromo/chromo shadow domain||-||Zinc finger, PHD-finger||Chromo domain-like||CHD, N-terminal||Domain of unknown function DUF1087||Helicase, C-terminal||P-loop containing nucleoside triphosphate hydrolase||Chro…	125095981	125130591	+	55769	downstream
ENSMUSG00000099587.1	Gm28967	Annotated_lncRNA	125186361	125186641	-	ENSMUST00000043422	ENSMUSG00000038213	Tapbpl	Immunoglobulin C1-set||Immunoglobulin-like domain||Immunoglobulin V-set domain||Immunoglobulin subtype||Immunoglobulin/major histocompatibility complex, conserved site	125223933	125231860	-	37291	downstream
ENSMUSG00000099587.1	Gm28967	Annotated_lncRNA	125186361	125186641	-	ENSMUST00000112281	ENSMUSG00000030336	Cd27	Tumour necrosis factor receptor 7||TNFR/NGFR cysteine-rich region	125233153	125236994	-	46511	downstream
ENSMUSG00000099587.1	Gm28967	Annotated_lncRNA	125186361	125186641	-	ENSMUST00000112282	ENSMUSG00000030336	Cd27	Tumour necrosis factor receptor 7||TNFR/NGFR cysteine-rich region	125233224	125236953	-	46582	downstream
ENSMUSG00000099587.1	Gm28967	Annotated_lncRNA	125186361	125186641	-	ENSMUST00000182277	ENSMUSG00000057666	Gapdh	Glyceraldehyde 3-phosphate dehydrogenase, NAD(P) binding domain||Glyceraldehyde-3-phosphate dehydrogenase, type I||Glyceraldehyde 3-phosphate dehydrogenase, active site||Glyceraldehyde 3-phosphate dehydrogenase, catalytic domain||Glyceraldehyde/Erythrose phosphate dehydrogenase family	125163288	125165603	-	20757	upstream
ENSMUSG00000099587.1	Gm28967	Annotated_lncRNA	125186361	125186641	-	ENSMUST00000073605	ENSMUSG00000057666	Gapdh	Glyceraldehyde 3-phosphate dehydrogenase, NAD(P) binding domain||Glyceraldehyde-3-phosphate dehydrogenase, type I||Glyceraldehyde 3-phosphate dehydrogenase, active site||Glyceraldehyde 3-phosphate dehydrogenase, catalytic domain||Glyceraldehyde/Erythrose phosphate dehydrogenase family	125161854	125166467	-	19893	upstream
ENSMUSG00000099587.1	Gm28967	Annotated_lncRNA	125186361	125186641	-	ENSMUST00000063588	ENSMUSG00000030337	Vamp1	Synaptobrevin||Synaptobrevin/Vesicle-associated membrane protein	125215581	125241249	+	28939	upstream
ENSMUSG00000099587.1	Gm28967	Annotated_lncRNA	125186361	125186641	-	ENSMUST00000117757	ENSMUSG00000057666	Gapdh	Glyceraldehyde 3-phosphate dehydrogenase, NAD(P) binding domain||Glyceraldehyde-3-phosphate dehydrogenase, type I||Glyceraldehyde 3-phosphate dehydrogenase, active site||Glyceraldehyde 3-phosphate dehydrogenase, catalytic domain||Glyceraldehyde/Erythrose phosphate dehydrogenase family	125161853	125166467	-	19893	upstream
ENSMUSG00000099587.1	Gm28967	Annotated_lncRNA	125186361	125186641	-	ENSMUST00000148835	ENSMUSG00000038271	Iffo1	-	125145801	125161776	+	24584	downstream
ENSMUSG00000099587.1	Gm28967	Annotated_lncRNA	125186361	125186641	-	ENSMUST00000118875	ENSMUSG00000057666	Gapdh	Glyceraldehyde 3-phosphate dehydrogenase, NAD(P) binding domain||Glyceraldehyde-3-phosphate dehydrogenase, type I||Glyceraldehyde 3-phosphate dehydrogenase, active site||Glyceraldehyde 3-phosphate dehydrogenase, catalytic domain||Glyceraldehyde/Erythrose phosphate dehydrogenase family	125161854	125165773	-	20587	upstream
ENSMUSG00000100426.1	Gm4208	Annotated_lncRNA	62821355	62832370	-	ENSMUST00000114157	ENSMUSG00000025969	Nrp2	Neuropilin-1, C-terminal||CUB domain||Galactose-binding domain-like||MAM domain||Neuropilin||Coagulation factor 5/8 C-terminal domain||Concanavalin A-like lectin/glucanase domain	62703702	62818695	+	2659	downstream
ENSMUSG00000100426.1	Gm4208	Annotated_lncRNA	62821355	62832370	-	ENSMUST00000114155	ENSMUSG00000025969	Nrp2	Neuropilin-1, C-terminal||CUB domain||Galactose-binding domain-like||MAM domain||Neuropilin||Coagulation factor 5/8 C-terminal domain||Concanavalin A-like lectin/glucanase domain	62703702	62799314	+	22040	downstream
ENSMUSG00000100426.1	Gm4208	Annotated_lncRNA	62821355	62832370	-	ENSMUST00000102822	ENSMUSG00000025969	Nrp2	Neuropilin-1, C-terminal||CUB domain||Galactose-binding domain-like||MAM domain||Neuropilin||Coagulation factor 5/8 C-terminal domain||Concanavalin A-like lectin/glucanase domain	62703285	62818695	+	2659	downstream
ENSMUSG00000100426.1	Gm4208	Annotated_lncRNA	62821355	62832370	-	ENSMUST00000075144	ENSMUSG00000025969	Nrp2	Neuropilin-1, C-terminal||CUB domain||Galactose-binding domain-like||MAM domain||Neuropilin||Coagulation factor 5/8 C-terminal domain||Concanavalin A-like lectin/glucanase domain	62703285	62818695	+	2659	downstream
ENSMUSG00000100426.1	Gm4208	Annotated_lncRNA	62821355	62832370	-	ENSMUST00000027112	ENSMUSG00000025969	Nrp2	Neuropilin-1, C-terminal||CUB domain||Galactose-binding domain-like||MAM domain||Neuropilin||Coagulation factor 5/8 C-terminal domain||Concanavalin A-like lectin/glucanase domain	62703702	62796981	+	24373	downstream
ENSMUSG00000100426.1	Gm4208	Annotated_lncRNA	62821355	62832370	-	ENSMUST00000063594	ENSMUSG00000025969	Nrp2	Neuropilin-1, C-terminal||CUB domain||Galactose-binding domain-like||MAM domain||Neuropilin||Coagulation factor 5/8 C-terminal domain||Concanavalin A-like lectin/glucanase domain	62703702	62818695	+	2659	downstream
ENSMUSG00000066170.6	E230001N04Rik	Annotated_lncRNA	28523257	28525347	+	ENSMUST00000079413	ENSMUSG00000024222	Fkbp5	Tetratricopeptide repeat||FKBP-type peptidyl-prolyl cis-trans isomerase domain||Tetratricopeptide repeat-containing domain	28399095	28486149	-	37107	upstream
ENSMUSG00000066170.6	E230001N04Rik	Annotated_lncRNA	28523257	28525347	+	ENSMUST00000114785	ENSMUSG00000024225	Clps	Colipase, C-terminal||Colipase, N-terminal||Colipase||Colipase, conserved site	28558213	28560711	-	32865	downstream
ENSMUSG00000066170.6	E230001N04Rik	Annotated_lncRNA	28523257	28525347	+	ENSMUST00000114792	ENSMUSG00000024222	Fkbp5	Tetratricopeptide repeat||FKBP-type peptidyl-prolyl cis-trans isomerase domain||Tetratricopeptide repeat-containing domain	28399097	28517524	-	5732	upstream
ENSMUSG00000066170.6	E230001N04Rik	Annotated_lncRNA	28523257	28525347	+	ENSMUST00000025060	ENSMUSG00000024223	Armc12	Armadillo-type fold||Armadillo repeat-containing domain	28530860	28538954	+	5512	upstream
ENSMUSG00000066170.6	E230001N04Rik	Annotated_lncRNA	28523257	28525347	+	ENSMUST00000025061	ENSMUSG00000024224	Clpsl2	Colipase	28549489	28552618	+	24141	upstream
ENSMUSG00000066170.6	E230001N04Rik	Annotated_lncRNA	28523257	28525347	+	ENSMUST00000025062	ENSMUSG00000024225	Clps	Colipase, C-terminal||Colipase, N-terminal||Colipase||Colipase, conserved site	28558210	28560766	-	32862	downstream
ENSMUSG00000066170.6	E230001N04Rik	Annotated_lncRNA	28523257	28525347	+	ENSMUST00000080780	ENSMUSG00000062252	Lhfpl5	Lipoma HMGIC fusion partner-like protein	28575718	28583593	+	50370	upstream
ENSMUSG00000066170.6	E230001N04Rik	Annotated_lncRNA	28523257	28525347	+	ENSMUST00000153744	ENSMUSG00000024222	Fkbp5	Tetratricopeptide repeat||FKBP-type peptidyl-prolyl cis-trans isomerase domain||Tetratricopeptide repeat-containing domain	28415961	28441722	-	81534	upstream
ENSMUSG00000066170.6	E230001N04Rik	Annotated_lncRNA	28523257	28525347	+	ENSMUST00000114767	ENSMUSG00000004865	Srpk1	Serine/threonine-protein kinase, active site||Protein kinase domain||Protein kinase, ATP binding site||Serine/threonine/dual specificity protein kinase, catalytic domain||-||Protein kinase-like domain	28620143	28622472	-	94795	downstream
ENSMUSG00000066170.6	E230001N04Rik	Annotated_lncRNA	28523257	28525347	+	ENSMUST00000130643	ENSMUSG00000004865	Srpk1	Serine/threonine-protein kinase, active site||Protein kinase domain||Protein kinase, ATP binding site||Serine/threonine/dual specificity protein kinase, catalytic domain||-||Protein kinase-like domain	28587648	28622521	-	62300	downstream
ENSMUSG00000066170.6	E230001N04Rik	Annotated_lncRNA	28523257	28525347	+	ENSMUST00000177939	ENSMUSG00000024222	Fkbp5	Tetratricopeptide repeat||FKBP-type peptidyl-prolyl cis-trans isomerase domain||Tetratricopeptide repeat-containing domain	28399105	28517524	-	5732	upstream
ENSMUSG00000097392.2	D930016D06Rik	Annotated_lncRNA	104525735	104554207	+	ENSMUST00000096452	ENSMUSG00000079065	BC005561	THO complex, subunitTHOC2, N-terminal||THO complex, subunitTHOC2, C-terminal	104508352	104522611	+	3123	downstream
ENSMUSG00000097392.2	D930016D06Rik	Annotated_lncRNA	104525735	104554207	+	ENSMUST00000112747	ENSMUSG00000029304	Spp1	Osteopontin||Osteopontin, conserved site	104436192	104441043	+	84691	downstream
ENSMUSG00000097392.2	D930016D06Rik	Annotated_lncRNA	104525735	104554207	+	ENSMUST00000145084	ENSMUSG00000029304	Spp1	Osteopontin||Osteopontin, conserved site	104435142	104439504	+	86230	downstream
ENSMUSG00000097392.2	D930016D06Rik	Annotated_lncRNA	104525735	104554207	+	ENSMUST00000132457	ENSMUSG00000029304	Spp1	Osteopontin||Osteopontin, conserved site	104435158	104437710	+	88024	downstream
ENSMUSG00000097392.2	D930016D06Rik	Annotated_lncRNA	104525735	104554207	+	ENSMUST00000112746	ENSMUSG00000029304	Spp1	Osteopontin||Osteopontin, conserved site	104435139	104439542	+	86192	downstream
ENSMUSG00000097392.2	D930016D06Rik	Annotated_lncRNA	104525735	104554207	+	ENSMUST00000086833	ENSMUSG00000029304	Spp1	Osteopontin||Osteopontin, conserved site	104435118	104441048	+	84686	downstream
ENSMUSG00000097392.2	D930016D06Rik	Annotated_lncRNA	104525735	104554207	+	ENSMUST00000031243	ENSMUSG00000029304	Spp1	Osteopontin||Osteopontin, conserved site	104435118	104441050	+	84684	downstream
ENSMUSG00000097392.2	D930016D06Rik	Annotated_lncRNA	104525735	104554207	+	ENSMUST00000112748	ENSMUSG00000029304	Spp1	Osteopontin||Osteopontin, conserved site	104435121	104441047	+	84687	downstream
ENSMUSG00000097392.2	D930016D06Rik	Annotated_lncRNA	104525735	104554207	+	ENSMUST00000086831	ENSMUSG00000034462	Pkd2	Polycystin cation channel, PKD1/PKD2||Polycystic kidney disease type 2 protein||EF-hand domain	104459450	104505819	+	19915	downstream
ENSMUSG00000087616.1	Gm14257	Annotated_lncRNA	155593565	155594475	-	ENSMUST00000041059	ENSMUSG00000038324	Trpc4ap	Protein of unknown function DUF3689||Armadillo-type fold	155634271	155692384	-	39795	downstream
ENSMUSG00000087616.1	Gm14257	Annotated_lncRNA	155593565	155594475	-	ENSMUST00000092995	ENSMUSG00000074652	Myh7b	Myosin, N-terminal, SH3-like||IQ motif, EF-hand binding site||Myosin tail||P-loop containing nucleoside triphosphate hydrolase||Myosin head, motor domain	155611212	155634307	+	16736	upstream
ENSMUSG00000087616.1	Gm14257	Annotated_lncRNA	155593565	155594475	-	ENSMUST00000103140	ENSMUSG00000038324	Trpc4ap	Protein of unknown function DUF3689||Armadillo-type fold	155634308	155692332	-	39832	downstream
ENSMUSG00000087616.1	Gm14257	Annotated_lncRNA	155593565	155594475	-	ENSMUST00000155347	ENSMUSG00000027610	Gss	Glutathione synthase, eukaryotic||Glutathione synthase, substrate-binding, eukaryotic||Pre-ATP-grasp domain	155577593	155592567	-	997	upstream
ENSMUSG00000087616.1	Gm14257	Annotated_lncRNA	155593565	155594475	-	ENSMUST00000103142	ENSMUSG00000027605	Acss2	AMP-binding enzyme C-terminal domain||AMP-binding, conserved site||-||AMP-dependent synthetase/ligase	155518107	155562080	+	31484	downstream
ENSMUSG00000087616.1	Gm14257	Annotated_lncRNA	155593565	155594475	-	ENSMUST00000029131	ENSMUSG00000027603	Ggt7	Nucleophile aminohydrolases, N-terminal||Gamma-glutamyltranspeptidase	155490379	155514848	-	78716	upstream
ENSMUSG00000087616.1	Gm14257	Annotated_lncRNA	155593565	155594475	-	ENSMUST00000151781	ENSMUSG00000027605	Acss2	AMP-binding enzyme C-terminal domain||AMP-binding, conserved site||-||AMP-dependent synthetase/ligase	155549232	155557364	+	36200	downstream
ENSMUSG00000087616.1	Gm14257	Annotated_lncRNA	155593565	155594475	-	ENSMUST00000065973	ENSMUSG00000027605	Acss2	AMP-binding enzyme C-terminal domain||AMP-binding, conserved site||-||AMP-dependent synthetase/ligase	155518057	155585724	+	7840	downstream
ENSMUSG00000087616.1	Gm14257	Annotated_lncRNA	155593565	155594475	-	ENSMUST00000029135	ENSMUSG00000027605	Acss2	AMP-binding enzyme C-terminal domain||AMP-binding, conserved site||-||AMP-dependent synthetase/ligase	155517948	155562746	+	30818	downstream
ENSMUSG00000087616.1	Gm14257	Annotated_lncRNA	155593565	155594475	-	ENSMUST00000130881	ENSMUSG00000027610	Gss	Glutathione synthase, eukaryotic||Glutathione synthase, substrate-binding, eukaryotic||Pre-ATP-grasp domain	155563189	155592714	-	850	upstream
ENSMUSG00000087616.1	Gm14257	Annotated_lncRNA	155593565	155594475	-	ENSMUST00000176117	ENSMUSG00000027603	Ggt7	Nucleophile aminohydrolases, N-terminal||Gamma-glutamyltranspeptidase	155500765	155506954	-	86610	upstream
ENSMUSG00000087616.1	Gm14257	Annotated_lncRNA	155593565	155594475	-	ENSMUST00000175993	ENSMUSG00000027610	Gss	Glutathione synthase, eukaryotic||Glutathione synthase, substrate-binding, eukaryotic||Pre-ATP-grasp domain	155563489	155573004	-	20560	upstream
ENSMUSG00000087616.1	Gm14257	Annotated_lncRNA	155593565	155594475	-	ENSMUST00000126322	ENSMUSG00000027610	Gss	Glutathione synthase, eukaryotic||Glutathione synthase, substrate-binding, eukaryotic||Pre-ATP-grasp domain	155572965	155582662	-	10902	upstream
ENSMUSG00000087616.1	Gm14257	Annotated_lncRNA	155593565	155594475	-	ENSMUST00000147601	ENSMUSG00000027603	Ggt7	Nucleophile aminohydrolases, N-terminal||Gamma-glutamyltranspeptidase	155504773	155518237	-	75327	upstream
ENSMUSG00000087616.1	Gm14257	Annotated_lncRNA	155593565	155594475	-	ENSMUST00000079691	ENSMUSG00000027610	Gss	Glutathione synthase, eukaryotic||Glutathione synthase, substrate-binding, eukaryotic||Pre-ATP-grasp domain	155563181	155592810	-	754	upstream
XLOC_024474	--	Novel_lncRNA	127445477	127449908	-	ENSMUST00000103214	ENSMUSG00000027376	Prom2	Prominin	127526955	127541385	-	77046	downstream
XLOC_024474	--	Novel_lncRNA	127445477	127449908	-	ENSMUST00000179618	ENSMUSG00000050468	Astl	Peptidase M12A, astacin||Peptidase, metallopeptidase	127341644	127357649	+	87827	downstream
XLOC_024474	--	Novel_lncRNA	127445477	127449908	-	ENSMUST00000028855	ENSMUSG00000027376	Prom2	Prominin	127526473	127541467	-	76564	downstream
XLOC_024474	--	Novel_lncRNA	127445477	127449908	-	ENSMUST00000028850	ENSMUSG00000079056	Kcnip3	EF-hand domain||EF-hand domain pair||EF-Hand 1, calcium-binding site	127456498	127521370	-	6589	downstream
XLOC_024474	--	Novel_lncRNA	127445477	127449908	-	ENSMUST00000103215	ENSMUSG00000079056	Kcnip3	EF-hand domain||EF-hand domain pair||EF-Hand 1, calcium-binding site	127456498	127521370	-	6589	downstream
XLOC_024474	--	Novel_lncRNA	127445477	127449908	-	ENSMUST00000088538	ENSMUSG00000079056	Kcnip3	EF-hand domain||EF-hand domain pair||EF-Hand 1, calcium-binding site	127458130	127482499	-	8221	downstream
XLOC_024474	--	Novel_lncRNA	127445477	127449908	-	ENSMUST00000028848	ENSMUSG00000027371	Fahd2a	Fumarylacetoacetase, C-terminal-related	127436215	127444550	-	926	upstream
XLOC_024474	--	Novel_lncRNA	127445477	127449908	-	ENSMUST00000104934	ENSMUSG00000058620	Adra2b	Adrenoceptor family||Alpha 2B adrenoceptor||G protein-coupled receptor, rhodopsin-like||GPCR, rhodopsin-like, 7TM	127363208	127367221	+	78255	downstream
XLOC_024474	--	Novel_lncRNA	127445477	127449908	-	ENSMUST00000059839	ENSMUSG00000050468	Astl	Peptidase M12A, astacin||Peptidase, metallopeptidase	127338639	127357651	+	87825	downstream
XLOC_024474	--	Novel_lncRNA	127445477	127449908	-	ENSMUST00000062211	ENSMUSG00000046338	Gpat2	Phospholipid/glycerol acyltransferase	127425199	127436092	+	9384	downstream
XLOC_024474	--	Novel_lncRNA	127445477	127449908	-	ENSMUST00000071902	ENSMUSG00000058620	Adra2b	Adrenoceptor family||Alpha 2B adrenoceptor||G protein-coupled receptor, rhodopsin-like||GPCR, rhodopsin-like, 7TM	127363286	127367221	+	78255	downstream
XLOC_024474	--	Novel_lncRNA	127445477	127449908	-	ENSMUST00000156747	ENSMUSG00000050468	Astl	Peptidase M12A, astacin||Peptidase, metallopeptidase	127341918	127350168	+	95308	downstream
XLOC_024474	--	Novel_lncRNA	127445477	127449908	-	ENSMUST00000089673	ENSMUSG00000050468	Astl	Peptidase M12A, astacin||Peptidase, metallopeptidase	127341630	127357650	+	87826	downstream
XLOC_024955	--	Novel_lncRNA	167847209	167847882	-	ENSMUST00000029053	ENSMUSG00000027540	Ptpn1	Tyrosine specific protein phosphatases domain||Protein-tyrosine phosphatase, non-receptor type-1/2||Protein-tyrosine phosphatase, active site||Protein-tyrosine phosphatase, catalytic||Protein-tyrosine phosphatase-like||PTP type protein phosphatase	167932327	167979385	+	84444	upstream
ENSMUSG00000092267.1	Gm20417	Annotated_lncRNA	5797562	5798549	+	ENSMUST00000155227	ENSMUSG00000024816	Frmd8	FERM central domain||Band 4.1 domain||FERM domain	5865270	5875239	-	66720	downstream
ENSMUSG00000092267.1	Gm20417	Annotated_lncRNA	5797562	5798549	+	ENSMUST00000116558	ENSMUSG00000024939	Fam89b	-	5728087	5729633	-	67928	upstream
ENSMUSG00000092267.1	Gm20417	Annotated_lncRNA	5797562	5798549	+	ENSMUST00000136983	ENSMUSG00000024826	Dpf2	Zinc finger, C2H2-like||Zinc finger, PHD-finger||Requiem/DPF N-terminal domain||Zinc finger, FYVE/PHD-type||Zinc finger, C2H2||Zinc finger, PHD-type	5896516	5912871	-	97966	downstream
ENSMUSG00000092267.1	Gm20417	Annotated_lncRNA	5797562	5798549	+	ENSMUST00000025728	ENSMUSG00000024816	Frmd8	FERM central domain||Band 4.1 domain||FERM domain	5849702	5875274	-	51152	downstream
ENSMUSG00000092267.1	Gm20417	Annotated_lncRNA	5797562	5798549	+	ENSMUST00000055911	ENSMUSG00000044390	Tigd3	Homeodomain-like||DNA binding HTH domain, Psq-type||DDE superfamily endonuclease, CENP-B-like||HTH CenpB-type DNA-binding domain	5891139	5894107	-	92589	downstream
ENSMUSG00000092267.1	Gm20417	Annotated_lncRNA	5797562	5798549	+	ENSMUST00000155697	ENSMUSG00000024818	Slc25a45	Mitochondrial carrier protein||Mitochondrial substrate/solute carrier	5877826	5885766	+	79276	upstream
ENSMUSG00000092267.1	Gm20417	Annotated_lncRNA	5797562	5798549	+	ENSMUST00000161368	ENSMUSG00000024939	Fam89b	-	5728087	5729653	-	67908	upstream
ENSMUSG00000092267.1	Gm20417	Annotated_lncRNA	5797562	5798549	+	ENSMUST00000004156	ENSMUSG00000004054	Map3k11	Serine-threonine/tyrosine-protein kinase catalytic domain||Serine/threonine/dual specificity protein kinase, catalytic domain||SH3 domain||Protein kinase domain||Protein kinase, ATP binding site||Mitogen-activated protein (MAP) kinase kinase kinase, MLK1/MLK2/MLK4||Protein kinase-like domain||Serine/threonine-protein kinase, active site	5689131	5702862	+	94699	downstream
ENSMUSG00000092267.1	Gm20417	Annotated_lncRNA	5797562	5798549	+	ENSMUST00000025885	ENSMUSG00000079478	Sssca1	Sjoegren syndrome/scleroderma autoantigen 1	5730303	5731721	-	65840	upstream
ENSMUSG00000092267.1	Gm20417	Annotated_lncRNA	5797562	5798549	+	ENSMUST00000141362	ENSMUSG00000024818	Slc25a45	Mitochondrial carrier protein||Mitochondrial substrate/solute carrier	5878656	5884485	+	80106	upstream
ENSMUSG00000092267.1	Gm20417	Annotated_lncRNA	5797562	5798549	+	ENSMUST00000159693	ENSMUSG00000079478	Sssca1	Sjoegren syndrome/scleroderma autoantigen 1	5730307	5731732	-	65829	upstream
ENSMUSG00000092267.1	Gm20417	Annotated_lncRNA	5797562	5798549	+	ENSMUST00000118623	ENSMUSG00000024826	Dpf2	Zinc finger, C2H2-like||Zinc finger, PHD-finger||Requiem/DPF N-terminal domain||Zinc finger, FYVE/PHD-type||Zinc finger, C2H2||Zinc finger, PHD-type	5897387	5912792	-	98837	downstream
ENSMUSG00000092267.1	Gm20417	Annotated_lncRNA	5797562	5798549	+	ENSMUST00000162976	ENSMUSG00000079478	Sssca1	Sjoegren syndrome/scleroderma autoantigen 1	5730411	5731475	-	66086	upstream
ENSMUSG00000092267.1	Gm20417	Annotated_lncRNA	5797562	5798549	+	ENSMUST00000025732	ENSMUSG00000024818	Slc25a45	Mitochondrial carrier protein||Mitochondrial substrate/solute carrier	5877817	5885766	+	79267	upstream
ENSMUSG00000092267.1	Gm20417	Annotated_lncRNA	5797562	5798549	+	ENSMUST00000125114	ENSMUSG00000024818	Slc25a45	Mitochondrial carrier protein||Mitochondrial substrate/solute carrier	5877817	5885766	+	79267	upstream
ENSMUSG00000092267.1	Gm20417	Annotated_lncRNA	5797562	5798549	+	ENSMUST00000049295	ENSMUSG00000024937	Ehbp1l1	EEIG1/EHBP1 N-terminal domain||Domain of unknown function DUF3585||Calponin homology domain	5707376	5726317	-	71244	upstream
ENSMUSG00000092267.1	Gm20417	Annotated_lncRNA	5797562	5798549	+	ENSMUST00000052448	ENSMUSG00000024936	Kcnk7	Two pore domain potassium channel, TASK family||Two pore domain potassium channel||Potassium channel domain||Two pore domain potassium channel, TWIK family	5704367	5707101	+	90460	downstream
ENSMUSG00000092267.1	Gm20417	Annotated_lncRNA	5797562	5798549	+	ENSMUST00000099955	ENSMUSG00000024939	Fam89b	-	5728087	5729651	-	67910	upstream
ENSMUSG00000092267.1	Gm20417	Annotated_lncRNA	5797562	5798549	+	ENSMUST00000145200	ENSMUSG00000024818	Slc25a45	Mitochondrial carrier protein||Mitochondrial substrate/solute carrier	5877808	5884884	+	79258	upstream
ENSMUSG00000092267.1	Gm20417	Annotated_lncRNA	5797562	5798549	+	ENSMUST00000075606	ENSMUSG00000024937	Ehbp1l1	EEIG1/EHBP1 N-terminal domain||Domain of unknown function DUF3585||Calponin homology domain	5707376	5726317	-	71244	upstream
ENSMUSG00000092267.1	Gm20417	Annotated_lncRNA	5797562	5798549	+	ENSMUST00000081496	ENSMUSG00000024940	Ltbp3	EGF-like calcium-binding, conserved site||EGF-like domain||Insulin-like growth factor binding protein, N-terminal||TB domain||EGF-like calcium-binding domain||EGF-type aspartate/asparagine hydroxylation site||EGF-like, conserved site	5740904	5758532	+	39029	downstream
ENSMUSG00000092267.1	Gm20417	Annotated_lncRNA	5797562	5798549	+	ENSMUST00000025890	ENSMUSG00000024941	Scyl1	Armadillo-type fold||Protein kinase-like domain||Serine/threonine/dual specificity protein kinase, catalytic domain||Protein kinase domain	5758427	5771401	-	26160	upstream
ENSMUSG00000092267.1	Gm20417	Annotated_lncRNA	5797562	5798549	+	ENSMUST00000136833	ENSMUSG00000024818	Slc25a45	Mitochondrial carrier protein||Mitochondrial substrate/solute carrier	5878628	5880596	+	80078	upstream
ENSMUSG00000097073.7	9430037G07Rik	Annotated_lncRNA	88595325	88599243	-	ENSMUST00000113110	ENSMUSG00000079427	Mthfsl	5-formyltetrahydrofolate cyclo-ligase	88688602	88719813	-	89358	downstream
ENSMUSG00000097073.7	9430037G07Rik	Annotated_lncRNA	88595325	88599243	-	ENSMUST00000162827	ENSMUSG00000032425	Zfp949	Zinc finger, C2H2||-||Zinc finger, C2H2-like||Krueppel-associated box	88548020	88571061	+	24263	downstream
ENSMUSG00000097073.7	9430037G07Rik	Annotated_lncRNA	88595325	88599243	-	ENSMUST00000161232	ENSMUSG00000032425	Zfp949	Zinc finger, C2H2||-||Zinc finger, C2H2-like||Krueppel-associated box	88548100	88554539	+	40785	downstream
ENSMUSG00000097073.7	9430037G07Rik	Annotated_lncRNA	88595325	88599243	-	ENSMUST00000160652	ENSMUSG00000032425	Zfp949	Zinc finger, C2H2||-||Zinc finger, C2H2-like||Krueppel-associated box	88548044	88567286	+	28038	downstream
ENSMUSG00000097073.7	9430037G07Rik	Annotated_lncRNA	88595325	88599243	-	ENSMUST00000164661	ENSMUSG00000090693	Trim43a	Zinc finger, RING-type, conserved site||Concanavalin A-like lectin/glucanase domain||Zinc finger, C3HC4 RING-type||B-box-type zinc finger||B30.2/SPRY domain||Zinc finger, RING-type||SPRY domain||Butyrophylin-like	88580891	88588819	+	6505	downstream
ENSMUSG00000097073.7	9430037G07Rik	Annotated_lncRNA	88595325	88599243	-	ENSMUST00000161458	ENSMUSG00000032425	Zfp949	Zinc finger, C2H2||-||Zinc finger, C2H2-like||Krueppel-associated box	88548183	88571061	+	24263	downstream
ENSMUSG00000097320.8	Tmem147os	Annotated_lncRNA	30729579	30745929	+	ENSMUST00000165887	ENSMUSG00000060962	Dmkn	-	30763756	30781059	+	17826	upstream
ENSMUSG00000097320.8	Tmem147os	Annotated_lncRNA	30729579	30745929	+	ENSMUST00000168528	ENSMUSG00000051314	Ffar2	G protein-coupled receptor, rhodopsin-like||G protein-coupled receptor 40-related receptor||GPCR, rhodopsin-like, 7TM	30819116	30821648	-	73186	downstream
ENSMUSG00000097320.8	Tmem147os	Annotated_lncRNA	30729579	30745929	+	ENSMUST00000085691	ENSMUSG00000060962	Dmkn	-	30763763	30781058	+	17833	upstream
ENSMUSG00000097320.8	Tmem147os	Annotated_lncRNA	30729579	30745929	+	ENSMUST00000098559	ENSMUSG00000074199	Krtdap	-||Keratinocyte differentiation-associated protein	30787905	30791097	+	41975	upstream
ENSMUSG00000097320.8	Tmem147os	Annotated_lncRNA	30729579	30745929	+	ENSMUST00000187493	ENSMUSG00000074199	Krtdap	-||Keratinocyte differentiation-associated protein	30787905	30791089	+	41975	upstream
ENSMUSG00000097320.8	Tmem147os	Annotated_lncRNA	30729579	30745929	+	ENSMUST00000053156	ENSMUSG00000051314	Ffar2	G protein-coupled receptor, rhodopsin-like||G protein-coupled receptor 40-related receptor||GPCR, rhodopsin-like, 7TM	30818348	30823775	-	72418	downstream
ENSMUSG00000097320.8	Tmem147os	Annotated_lncRNA	30729579	30745929	+	ENSMUST00000042726	ENSMUSG00000036733	Rbm42	RNA recognition motif domain	30640994	30650317	-	79261	upstream
ENSMUSG00000097320.8	Tmem147os	Annotated_lncRNA	30729579	30745929	+	ENSMUST00000006478	ENSMUSG00000006315	Tmem147	Protein of unknown function DUF2053, membrane	30727701	30729534	-	44	upstream
ENSMUSG00000097320.8	Tmem147os	Annotated_lncRNA	30729579	30745929	+	ENSMUST00000013227	ENSMUSG00000013083	2200002J24Rik	CD225/Dispanin family	30699783	30700380	+	29198	downstream
ENSMUSG00000097320.8	Tmem147os	Annotated_lncRNA	30729579	30745929	+	ENSMUST00000182577	ENSMUSG00000046056	Sbsn	-	30752628	30756126	+	6698	upstream
ENSMUSG00000097320.8	Tmem147os	Annotated_lncRNA	30729579	30745929	+	ENSMUST00000085688	ENSMUSG00000060962	Dmkn	-	30763799	30781058	+	17869	upstream
ENSMUSG00000097320.8	Tmem147os	Annotated_lncRNA	30729579	30745929	+	ENSMUST00000108141	ENSMUSG00000036733	Rbm42	RNA recognition motif domain	30640999	30650144	-	79434	upstream
ENSMUSG00000097320.8	Tmem147os	Annotated_lncRNA	30729579	30745929	+	ENSMUST00000108147	ENSMUSG00000006311	Etv2	Ets domain	30633616	30635852	-	93726	upstream
ENSMUSG00000097320.8	Tmem147os	Annotated_lncRNA	30729579	30745929	+	ENSMUST00000051495	ENSMUSG00000049761	Pmis2	CD225/Dispanin family	30670722	30671605	-	57973	upstream
ENSMUSG00000097320.8	Tmem147os	Annotated_lncRNA	30729579	30745929	+	ENSMUST00000182227	ENSMUSG00000046056	Sbsn	-	30751555	30756134	+	5625	upstream
ENSMUSG00000097320.8	Tmem147os	Annotated_lncRNA	30729579	30745929	+	ENSMUST00000080518	ENSMUSG00000046056	Sbsn	-	30751562	30755988	+	5632	upstream
ENSMUSG00000097320.8	Tmem147os	Annotated_lncRNA	30729579	30745929	+	ENSMUST00000019697	ENSMUSG00000078762	Haus5	HAUS complex subunit 5, metazoa||HAUS augmin-like complex subunit 5	30653716	30664994	-	64584	upstream
ENSMUSG00000097320.8	Tmem147os	Annotated_lncRNA	30729579	30745929	+	ENSMUST00000170371	ENSMUSG00000005553	Atp4a	HAD-like domain||Cation-transporting P-type ATPase, N-terminal||Gastric H+/K+-transporter P-type ATPase, N-terminal||P-type ATPase, subfamily IIC||P-type ATPase||-||P-type ATPase, A domain||P-type ATPase, cytoplasmic domain N||P-type ATPase, phosphorylation site||Cation-transporting P-type ATPase, C-terminal	30712232	30725534	+	4044	downstream
ENSMUSG00000097320.8	Tmem147os	Annotated_lncRNA	30729579	30745929	+	ENSMUST00000190990	ENSMUSG00000074199	Krtdap	-||Keratinocyte differentiation-associated protein	30787905	30791083	+	41975	upstream
ENSMUSG00000097320.8	Tmem147os	Annotated_lncRNA	30729579	30745929	+	ENSMUST00000182634	ENSMUSG00000061099	Gapdhs	Glyceraldehyde 3-phosphate dehydrogenase, catalytic domain||Glyceraldehyde 3-phosphate dehydrogenase, active site||Glyceraldehyde-3-phosphate dehydrogenase, type I||Glyceraldehyde 3-phosphate dehydrogenase, NAD(P) binding domain||Glyceraldehyde/Erythrose phosphate dehydrogenase family	30729780	30743681	-	-13902	antisense
ENSMUSG00000097320.8	Tmem147os	Annotated_lncRNA	30729579	30745929	+	ENSMUST00000182229	ENSMUSG00000046056	Sbsn	-	30751471	30756134	+	5541	upstream
ENSMUSG00000097320.8	Tmem147os	Annotated_lncRNA	30729579	30745929	+	ENSMUST00000186059	ENSMUSG00000051314	Ffar2	G protein-coupled receptor, rhodopsin-like||G protein-coupled receptor 40-related receptor||GPCR, rhodopsin-like, 7TM	30819713	30821147	-	73783	downstream
ENSMUSG00000097320.8	Tmem147os	Annotated_lncRNA	30729579	30745929	+	ENSMUST00000189962	ENSMUSG00000074199	Krtdap	-||Keratinocyte differentiation-associated protein	30787905	30791085	+	41975	upstream
ENSMUSG00000097320.8	Tmem147os	Annotated_lncRNA	30729579	30745929	+	ENSMUST00000005692	ENSMUSG00000005553	Atp4a	HAD-like domain||Cation-transporting P-type ATPase, N-terminal||Gastric H+/K+-transporter P-type ATPase, N-terminal||P-type ATPase, subfamily IIC||P-type ATPase||-||P-type ATPase, A domain||P-type ATPase, cytoplasmic domain N||P-type ATPase, phosphorylation site||Cation-transporting P-type ATPase, C-terminal	30712209	30725535	+	4043	downstream
ENSMUSG00000097320.8	Tmem147os	Annotated_lncRNA	30729579	30745929	+	ENSMUST00000182721	ENSMUSG00000046056	Sbsn	-	30751562	30756134	+	5632	upstream
ENSMUSG00000097320.8	Tmem147os	Annotated_lncRNA	30729579	30745929	+	ENSMUST00000188578	ENSMUSG00000060962	Dmkn	-	30765057	30780804	+	19127	upstream
ENSMUSG00000097320.8	Tmem147os	Annotated_lncRNA	30729579	30745929	+	ENSMUST00000186534	ENSMUSG00000051314	Ffar2	G protein-coupled receptor, rhodopsin-like||G protein-coupled receptor 40-related receptor||GPCR, rhodopsin-like, 7TM	30819686	30820977	-	73756	downstream
ENSMUSG00000097320.8	Tmem147os	Annotated_lncRNA	30729579	30745929	+	ENSMUST00000054427	ENSMUSG00000060962	Dmkn	-	30763763	30781058	+	17833	upstream
ENSMUSG00000097320.8	Tmem147os	Annotated_lncRNA	30729579	30745929	+	ENSMUST00000041703	ENSMUSG00000060962	Dmkn	-	30776401	30781063	+	30471	upstream
ENSMUSG00000097320.8	Tmem147os	Annotated_lncRNA	30729579	30745929	+	ENSMUST00000189673	ENSMUSG00000074199	Krtdap	-||Keratinocyte differentiation-associated protein	30787905	30791067	+	41975	upstream
ENSMUSG00000097320.8	Tmem147os	Annotated_lncRNA	30729579	30745929	+	ENSMUST00000186339	ENSMUSG00000051314	Ffar2	G protein-coupled receptor, rhodopsin-like||G protein-coupled receptor 40-related receptor||GPCR, rhodopsin-like, 7TM	30819568	30821138	-	73638	downstream
ENSMUSG00000097320.8	Tmem147os	Annotated_lncRNA	30729579	30745929	+	ENSMUST00000163504	ENSMUSG00000051314	Ffar2	G protein-coupled receptor, rhodopsin-like||G protein-coupled receptor 40-related receptor||GPCR, rhodopsin-like, 7TM	30818357	30821139	-	72427	downstream
ENSMUSG00000097320.8	Tmem147os	Annotated_lncRNA	30729579	30745929	+	ENSMUST00000074758	ENSMUSG00000061099	Gapdhs	Glyceraldehyde 3-phosphate dehydrogenase, catalytic domain||Glyceraldehyde 3-phosphate dehydrogenase, active site||Glyceraldehyde-3-phosphate dehydrogenase, type I||Glyceraldehyde 3-phosphate dehydrogenase, NAD(P) binding domain||Glyceraldehyde/Erythrose phosphate dehydrogenase family	30729887	30739407	-	-9521	antisense
ENSMUSG00000097088.1	Gm26615	Annotated_lncRNA	133085474	133089146	+	ENSMUST00000044521	ENSMUSG00000037692	Ahdc1	-	133012204	133077645	+	7828	downstream
ENSMUSG00000097088.1	Gm26615	Annotated_lncRNA	133085474	133089146	+	ENSMUST00000105916	ENSMUSG00000037692	Ahdc1	-	133011506	133078110	+	7363	downstream
ENSMUSG00000097088.1	Gm26615	Annotated_lncRNA	133085474	133089146	+	ENSMUST00000030693	ENSMUSG00000028874	Fgr	Protein kinase-like domain||Protein kinase, ATP binding site||SH2 domain||Tyrosine-protein kinase, catalytic domain||Serine-threonine/tyrosine-protein kinase catalytic domain||Tyrosine-protein kinase, active site||Protein kinase domain||SH3 domain	132974102	133001910	+	83563	downstream
ENSMUSG00000097088.1	Gm26615	Annotated_lncRNA	133085474	133089146	+	ENSMUST00000138831	ENSMUSG00000028868	Wasf2	-||WH2 domain	133130540	133185095	+	41393	upstream
ENSMUSG00000097088.1	Gm26615	Annotated_lncRNA	133085474	133089146	+	ENSMUST00000084241	ENSMUSG00000028868	Wasf2	-||WH2 domain	133130505	133199756	+	41358	upstream
ENSMUSG00000097088.1	Gm26615	Annotated_lncRNA	133085474	133089146	+	ENSMUST00000105915	ENSMUSG00000037692	Ahdc1	-	133011506	133077863	+	7610	downstream
ENSMUSG00000097088.1	Gm26615	Annotated_lncRNA	133085474	133089146	+	ENSMUST00000105914	ENSMUSG00000037692	Ahdc1	-	133039493	133077242	+	8231	downstream
ENSMUSG00000097088.1	Gm26615	Annotated_lncRNA	133085474	133089146	+	ENSMUST00000171223	ENSMUSG00000028874	Fgr	Protein kinase-like domain||Protein kinase, ATP binding site||SH2 domain||Tyrosine-protein kinase, catalytic domain||Serine-threonine/tyrosine-protein kinase catalytic domain||Tyrosine-protein kinase, active site||Protein kinase domain||SH3 domain	132977116	133000767	+	84706	downstream
ENSMUSG00000097088.1	Gm26615	Annotated_lncRNA	133085474	133089146	+	ENSMUST00000105912	ENSMUSG00000028868	Wasf2	-||WH2 domain	133176371	133196504	+	87224	upstream
ENSMUSG00000043993.6	2900052L18Rik	Annotated_lncRNA	120229802	120231585	-	ENSMUST00000053692	ENSMUSG00000061306	Slc38a10	Amino acid transporter, transmembrane domain	120123844	120151346	-	78455	upstream
ENSMUSG00000043993.6	2900052L18Rik	Annotated_lncRNA	120229802	120231585	-	ENSMUST00000045402	ENSMUSG00000061306	Slc38a10	Amino acid transporter, transmembrane domain	120103960	120151346	-	78455	upstream
ENSMUSG00000043993.6	2900052L18Rik	Annotated_lncRNA	120229802	120231585	-	ENSMUST00000118987	ENSMUSG00000039741	Bahcc1	Bromo adjacent homology (BAH) domain	120236699	120292282	+	5113	upstream
ENSMUSG00000043993.6	2900052L18Rik	Annotated_lncRNA	120229802	120231585	-	ENSMUST00000179094	ENSMUSG00000061306	Slc38a10	Amino acid transporter, transmembrane domain	120104452	120151312	-	78489	upstream
ENSMUSG00000043993.6	2900052L18Rik	Annotated_lncRNA	120229802	120231585	-	ENSMUST00000103018	ENSMUSG00000061306	Slc38a10	Amino acid transporter, transmembrane domain	120103960	120151346	-	78455	upstream
ENSMUSG00000043993.6	2900052L18Rik	Annotated_lncRNA	120229802	120231585	-	ENSMUST00000122148	ENSMUSG00000039741	Bahcc1	Bromo adjacent homology (BAH) domain	120232947	120292282	+	1361	upstream
ENSMUSG00000043993.6	2900052L18Rik	Annotated_lncRNA	120229802	120231585	-	ENSMUST00000076697	ENSMUSG00000061306	Slc38a10	Amino acid transporter, transmembrane domain	120118872	120151346	-	78455	upstream
ENSMUSG00000043993.6	2900052L18Rik	Annotated_lncRNA	120229802	120231585	-	ENSMUST00000044985	ENSMUSG00000039741	Bahcc1	Bromo adjacent homology (BAH) domain	120232947	120292296	+	1361	upstream
ENSMUSG00000097845.2	A230020J21Rik	Annotated_lncRNA	191025351	191029781	+	ENSMUST00000078259	ENSMUSG00000062510	Nsl1	Kinetochore Mis14	191063031	191086474	+	33249	upstream
ENSMUSG00000097845.2	A230020J21Rik	Annotated_lncRNA	191025351	191029781	+	ENSMUST00000135364	ENSMUSG00000026634	Angel2	Endonuclease/exonuclease/phosphatase||-	190928822	190937702	+	87648	downstream
ENSMUSG00000097845.2	A230020J21Rik	Annotated_lncRNA	191025351	191029781	+	ENSMUST00000110893	ENSMUSG00000026632	Tatdn3	TatD family	191045826	191062932	-	16044	downstream
ENSMUSG00000097845.2	A230020J21Rik	Annotated_lncRNA	191025351	191029781	+	ENSMUST00000027945	ENSMUSG00000026632	Tatdn3	TatD family	191045842	191062905	-	16060	downstream
ENSMUSG00000097845.2	A230020J21Rik	Annotated_lncRNA	191025351	191029781	+	ENSMUST00000085635	ENSMUSG00000066595	Mfsd7b	Major facilitator superfamily domain||Major facilitator superfamily	191005847	191026158	-	-808	antisense
ENSMUSG00000097845.2	A230020J21Rik	Annotated_lncRNA	191025351	191029781	+	ENSMUST00000139340	ENSMUSG00000062510	Nsl1	Kinetochore Mis14	191063024	191076939	+	33242	upstream
ENSMUSG00000097845.2	A230020J21Rik	Annotated_lncRNA	191025351	191029781	+	ENSMUST00000085633	ENSMUSG00000026632	Tatdn3	TatD family	191045838	191062904	-	16056	downstream
ENSMUSG00000097845.2	A230020J21Rik	Annotated_lncRNA	191025351	191029781	+	ENSMUST00000027943	ENSMUSG00000026630	Batf3	AP-1 transcription factor||Basic-leucine zipper domain	191098325	191108943	+	68543	upstream
ENSMUSG00000097845.2	A230020J21Rik	Annotated_lncRNA	191025351	191029781	+	ENSMUST00000191946	ENSMUSG00000066595	Mfsd7b	Major facilitator superfamily domain||Major facilitator superfamily	191024909	191026124	-	-774	antisense
ENSMUSG00000097845.2	A230020J21Rik	Annotated_lncRNA	191025351	191029781	+	ENSMUST00000192151	ENSMUSG00000057072	Spata45	-	191036639	191042935	+	6857	upstream
ENSMUSG00000097845.2	A230020J21Rik	Annotated_lncRNA	191025351	191029781	+	ENSMUST00000066632	ENSMUSG00000026634	Angel2	Endonuclease/exonuclease/phosphatase||-	190928492	190946962	+	78388	downstream
ENSMUSG00000097845.2	A230020J21Rik	Annotated_lncRNA	191025351	191029781	+	ENSMUST00000077889	ENSMUSG00000057072	Spata45	-	191036819	191042942	+	7037	upstream
ENSMUSG00000097845.2	A230020J21Rik	Annotated_lncRNA	191025351	191029781	+	ENSMUST00000166139	ENSMUSG00000037568	Vash2	Vasohibin	190947646	190979296	-	46054	upstream
ENSMUSG00000097845.2	A230020J21Rik	Annotated_lncRNA	191025351	191029781	+	ENSMUST00000076952	ENSMUSG00000062510	Nsl1	Kinetochore Mis14	191063012	191075206	+	33230	upstream
ENSMUSG00000097845.2	A230020J21Rik	Annotated_lncRNA	191025351	191029781	+	ENSMUST00000110891	ENSMUSG00000026632	Tatdn3	TatD family	191045842	191062904	-	16060	downstream
ENSMUSG00000097845.2	A230020J21Rik	Annotated_lncRNA	191025351	191029781	+	ENSMUST00000047409	ENSMUSG00000037568	Vash2	Vasohibin	190947648	190979002	-	46348	upstream
ENSMUSG00000097845.2	A230020J21Rik	Annotated_lncRNA	191025351	191029781	+	ENSMUST00000027947	ENSMUSG00000026634	Angel2	Endonuclease/exonuclease/phosphatase||-	190925112	190946962	+	78388	downstream
ENSMUSG00000097845.2	A230020J21Rik	Annotated_lncRNA	191025351	191029781	+	ENSMUST00000110899	ENSMUSG00000026634	Angel2	Endonuclease/exonuclease/phosphatase||-	190928492	190946962	+	78388	downstream
ENSMUSG00000097928.1	Gm26578	Annotated_lncRNA	32008504	32015759	+	ENSMUST00000073884	ENSMUSG00000062991	Nrg1	EGF-like, conserved site||Neuregulin-1||Neuregulin, C-terminal||EGF-like domain	31818028	31918203	-	90300	upstream
XLOC_007012	--	Novel_lncRNA	48853696	48855639	-	ENSMUST00000138019	ENSMUSG00000040365	Trim41	Zinc finger, RING-type, conserved site||Domain of unknown function DUF3631||SPRY-associated||B30.2/SPRY domain||B-box-type zinc finger||Concanavalin A-like lectin/glucanase domain||Zinc finger, RING-type||Zinc finger, B-box, chordata||SPRY domain||Butyrophylin-like	48809199	48816231	-	37464	upstream
XLOC_007012	--	Novel_lncRNA	48853696	48855639	-	ENSMUST00000047145	ENSMUSG00000040365	Trim41	Zinc finger, RING-type, conserved site||Domain of unknown function DUF3631||SPRY-associated||B30.2/SPRY domain||B-box-type zinc finger||Concanavalin A-like lectin/glucanase domain||Zinc finger, RING-type||Zinc finger, B-box, chordata||SPRY domain||Butyrophylin-like	48806404	48817353	-	36342	upstream
XLOC_007012	--	Novel_lncRNA	48853696	48855639	-	ENSMUST00000097494	ENSMUSG00000069893	9930111J21Rik1	P-loop containing nucleoside triphosphate hydrolase||Immunity-related GTPases-like||IRG-type guanine nucleotide-binding (G) domain	48946150	48979381	-	90510	downstream
XLOC_007012	--	Novel_lncRNA	48853696	48855639	-	ENSMUST00000059930	ENSMUSG00000048852	Gm12185	IRG-type guanine nucleotide-binding (G) domain||P-loop containing nucleoside triphosphate hydrolase||Immunity-related GTPases-like	48904658	48992226	-	49018	downstream
XLOC_007012	--	Novel_lncRNA	48853696	48855639	-	ENSMUST00000094476	ENSMUSG00000048852	Gm12185	IRG-type guanine nucleotide-binding (G) domain||P-loop containing nucleoside triphosphate hydrolase||Immunity-related GTPases-like	48904656	48927159	-	49016	downstream
XLOC_007012	--	Novel_lncRNA	48853696	48855639	-	ENSMUST00000046903	ENSMUSG00000040350	Trim7	Zinc finger, RING-type||Zinc finger, B-box, chordata||SPRY domain||Butyrophylin-like||-||Zinc finger, RING-type, conserved site||SPRY-associated||B-box-type zinc finger||B30.2/SPRY domain||Concanavalin A-like lectin/glucanase domain	48837465	48850555	+	3140	downstream
XLOC_007012	--	Novel_lncRNA	48853696	48855639	-	ENSMUST00000129674	ENSMUSG00000040350	Trim7	Zinc finger, RING-type||Zinc finger, B-box, chordata||SPRY domain||Butyrophylin-like||-||Zinc finger, RING-type, conserved site||SPRY-associated||B-box-type zinc finger||B30.2/SPRY domain||Concanavalin A-like lectin/glucanase domain	48838804	48845604	+	8091	downstream
XLOC_007012	--	Novel_lncRNA	48853696	48855639	-	ENSMUST00000131888	ENSMUSG00000040365	Trim41	Zinc finger, RING-type, conserved site||Domain of unknown function DUF3631||SPRY-associated||B30.2/SPRY domain||B-box-type zinc finger||Concanavalin A-like lectin/glucanase domain||Zinc finger, RING-type||Zinc finger, B-box, chordata||SPRY domain||Butyrophylin-like	48808386	48812395	-	41300	upstream
XLOC_007012	--	Novel_lncRNA	48853696	48855639	-	ENSMUST00000109212	ENSMUSG00000058163	Gm5431	IRG-type guanine nucleotide-binding (G) domain||P-loop containing nucleoside triphosphate hydrolase||Immunity-related GTPases-like	48888129	48902152	-	32489	downstream
XLOC_007012	--	Novel_lncRNA	48853696	48855639	-	ENSMUST00000149049	ENSMUSG00000040350	Trim7	Zinc finger, RING-type||Zinc finger, B-box, chordata||SPRY domain||Butyrophylin-like||-||Zinc finger, RING-type, conserved site||SPRY-associated||B-box-type zinc finger||B30.2/SPRY domain||Concanavalin A-like lectin/glucanase domain	48838514	48845547	+	8148	downstream
XLOC_007012	--	Novel_lncRNA	48853696	48855639	-	ENSMUST00000020640	ENSMUSG00000020372	Gnb2l1	WD40-repeat-containing domain||WD40 repeat, conserved site||G-protein beta WD-40 repeat||WD40 repeat	48800360	48806434	+	47261	downstream
XLOC_007012	--	Novel_lncRNA	48853696	48855639	-	ENSMUST00000097271	ENSMUSG00000046879	Irgm1	P-loop containing nucleoside triphosphate hydrolase||Immunity-related GTPases-like||IRG-type guanine nucleotide-binding (G) domain	48866118	48871420	-	10478	downstream
XLOC_007012	--	Novel_lncRNA	48853696	48855639	-	ENSMUST00000104958	ENSMUSG00000078153	Psme2b	Proteasome activator pa28||Proteasome activator pa28, C-terminal domain||Proteasome activator pa28, N-terminal domain	48945354	48946190	-	89714	downstream
XLOC_007012	--	Novel_lncRNA	48853696	48855639	-	ENSMUST00000104959	ENSMUSG00000078154	Gm12184	Cyclin-dependent kinase 2-associated protein 2||Cyclin-dependent kinase 2-associated protein	48825346	48826655	-	27040	upstream
XLOC_007012	--	Novel_lncRNA	48853696	48855639	-	ENSMUST00000140800	ENSMUSG00000040365	Trim41	Zinc finger, RING-type, conserved site||Domain of unknown function DUF3631||SPRY-associated||B30.2/SPRY domain||B-box-type zinc finger||Concanavalin A-like lectin/glucanase domain||Zinc finger, RING-type||Zinc finger, B-box, chordata||SPRY domain||Butyrophylin-like	48809097	48816953	-	36742	upstream
XLOC_007012	--	Novel_lncRNA	48853696	48855639	-	ENSMUST00000109213	ENSMUSG00000040350	Trim7	Zinc finger, RING-type||Zinc finger, B-box, chordata||SPRY domain||Butyrophylin-like||-||Zinc finger, RING-type, conserved site||SPRY-associated||B-box-type zinc finger||B30.2/SPRY domain||Concanavalin A-like lectin/glucanase domain	48826140	48851187	+	2508	downstream
XLOC_007012	--	Novel_lncRNA	48853696	48855639	-	ENSMUST00000109210	ENSMUSG00000058163	Gm5431	IRG-type guanine nucleotide-binding (G) domain||P-loop containing nucleoside triphosphate hydrolase||Immunity-related GTPases-like	48887422	48902152	-	31782	downstream
XLOC_007012	--	Novel_lncRNA	48853696	48855639	-	ENSMUST00000109209	ENSMUSG00000058163	Gm5431	IRG-type guanine nucleotide-binding (G) domain||P-loop containing nucleoside triphosphate hydrolase||Immunity-related GTPases-like	48888393	48894712	-	32753	downstream
XLOC_007012	--	Novel_lncRNA	48853696	48855639	-	ENSMUST00000049519	ENSMUSG00000046879	Irgm1	P-loop containing nucleoside triphosphate hydrolase||Immunity-related GTPases-like||IRG-type guanine nucleotide-binding (G) domain	48865245	48871374	-	9605	downstream
XLOC_026126	--	Novel_lncRNA	102693840	102702602	+	ENSMUST00000029451	ENSMUSG00000027858	Tspan2	Tetraspanin, conserved site||Tetraspanin/Peripherin||Tetraspanin	102734529	102772292	+	31926	upstream
XLOC_026126	--	Novel_lncRNA	102693840	102702602	+	ENSMUST00000029450	ENSMUSG00000027857	Tshb	Gonadotropin, beta subunit||Gonadotropin, beta subunit, conserved site||Cystine-knot cytokine||Glycoprotein hormone subunit beta, cystine knot	102777398	102782674	-	74795	downstream
XLOC_026126	--	Novel_lncRNA	102693840	102702602	+	ENSMUST00000170856	ENSMUSG00000027857	Tshb	Gonadotropin, beta subunit||Gonadotropin, beta subunit, conserved site||Cystine-knot cytokine||Glycoprotein hormone subunit beta, cystine knot	102777407	102782718	-	74804	downstream
XLOC_026126	--	Novel_lncRNA	102693840	102702602	+	ENSMUST00000200041	ENSMUSG00000027857	Tshb	Gonadotropin, beta subunit||Gonadotropin, beta subunit, conserved site||Cystine-knot cytokine||Glycoprotein hormone subunit beta, cystine knot	102777419	102782674	-	74816	downstream
XLOC_026126	--	Novel_lncRNA	102693840	102702602	+	ENSMUST00000197345	ENSMUSG00000027858	Tspan2	Tetraspanin, conserved site||Tetraspanin/Peripherin||Tetraspanin	102759310	102801513	+	56707	upstream
XLOC_026126	--	Novel_lncRNA	102693840	102702602	+	ENSMUST00000197322	ENSMUSG00000027857	Tshb	Gonadotropin, beta subunit||Gonadotropin, beta subunit, conserved site||Cystine-knot cytokine||Glycoprotein hormone subunit beta, cystine knot	102777446	102782483	-	74843	downstream
XLOC_026126	--	Novel_lncRNA	102693840	102702602	+	ENSMUST00000119902	ENSMUSG00000027858	Tspan2	Tetraspanin, conserved site||Tetraspanin/Peripherin||Tetraspanin	102735215	102769205	+	32612	upstream
XLOC_026126	--	Novel_lncRNA	102693840	102702602	+	ENSMUST00000196611	ENSMUSG00000027858	Tspan2	Tetraspanin, conserved site||Tetraspanin/Peripherin||Tetraspanin	102734957	102769021	+	32354	upstream
XLOC_026126	--	Novel_lncRNA	102693840	102702602	+	ENSMUST00000172026	ENSMUSG00000027857	Tshb	Gonadotropin, beta subunit||Gonadotropin, beta subunit, conserved site||Cystine-knot cytokine||Glycoprotein hormone subunit beta, cystine knot	102777398	102782714	-	74795	downstream
XLOC_026126	--	Novel_lncRNA	102686985	102705575	+	ENSMUST00000029451	ENSMUSG00000027858	Tspan2	Tetraspanin, conserved site||Tetraspanin/Peripherin||Tetraspanin	102734529	102772292	+	28953	upstream
XLOC_026126	--	Novel_lncRNA	102686985	102705575	+	ENSMUST00000029450	ENSMUSG00000027857	Tshb	Gonadotropin, beta subunit||Gonadotropin, beta subunit, conserved site||Cystine-knot cytokine||Glycoprotein hormone subunit beta, cystine knot	102777398	102782674	-	71822	downstream
XLOC_026126	--	Novel_lncRNA	102686985	102705575	+	ENSMUST00000170856	ENSMUSG00000027857	Tshb	Gonadotropin, beta subunit||Gonadotropin, beta subunit, conserved site||Cystine-knot cytokine||Glycoprotein hormone subunit beta, cystine knot	102777407	102782718	-	71831	downstream
XLOC_026126	--	Novel_lncRNA	102686985	102705575	+	ENSMUST00000200041	ENSMUSG00000027857	Tshb	Gonadotropin, beta subunit||Gonadotropin, beta subunit, conserved site||Cystine-knot cytokine||Glycoprotein hormone subunit beta, cystine knot	102777419	102782674	-	71843	downstream
XLOC_026126	--	Novel_lncRNA	102686985	102705575	+	ENSMUST00000197345	ENSMUSG00000027858	Tspan2	Tetraspanin, conserved site||Tetraspanin/Peripherin||Tetraspanin	102759310	102801513	+	53734	upstream
XLOC_026126	--	Novel_lncRNA	102686985	102705575	+	ENSMUST00000197322	ENSMUSG00000027857	Tshb	Gonadotropin, beta subunit||Gonadotropin, beta subunit, conserved site||Cystine-knot cytokine||Glycoprotein hormone subunit beta, cystine knot	102777446	102782483	-	71870	downstream
XLOC_026126	--	Novel_lncRNA	102686985	102705575	+	ENSMUST00000119902	ENSMUSG00000027858	Tspan2	Tetraspanin, conserved site||Tetraspanin/Peripherin||Tetraspanin	102735215	102769205	+	29639	upstream
XLOC_026126	--	Novel_lncRNA	102686985	102705575	+	ENSMUST00000196611	ENSMUSG00000027858	Tspan2	Tetraspanin, conserved site||Tetraspanin/Peripherin||Tetraspanin	102734957	102769021	+	29381	upstream
XLOC_026126	--	Novel_lncRNA	102686985	102705575	+	ENSMUST00000172026	ENSMUSG00000027857	Tshb	Gonadotropin, beta subunit||Gonadotropin, beta subunit, conserved site||Cystine-knot cytokine||Glycoprotein hormone subunit beta, cystine knot	102777398	102782714	-	71822	downstream
XLOC_026112	--	Novel_lncRNA	101667422	101673887	+	ENSMUST00000036493	ENSMUSG00000033161	Atp1a1	P-type ATPase, cytoplasmic domain N||P-type ATPase, phosphorylation site||Cation-transporting P-type ATPase, C-terminal||P-type ATPase, subfamily IIC||HAD-like domain||Cation-transporting P-type ATPase, N-terminal||P-type ATPase||P-type ATPase, A domain	101576219	101604684	-	62737	upstream
ENSMUSG00000106874.1	Gm20186	Annotated_lncRNA	18845910	18846763	-	ENSMUST00000056398	ENSMUSG00000044155	Lsm8	LSM domain||LSM domain, eukaryotic/archaea-type	18848579	18854053	+	1815	upstream
ENSMUSG00000106874.1	Gm20186	Annotated_lncRNA	18845910	18846763	-	ENSMUST00000031489	ENSMUSG00000029517	Ankrd7	Ankyrin repeat||Ankyrin repeat-containing domain	18866318	18879586	+	19554	upstream
ENSMUSG00000106874.1	Gm20186	Annotated_lncRNA	18845910	18846763	-	ENSMUST00000115396	ENSMUSG00000029517	Ankrd7	Ankyrin repeat||Ankyrin repeat-containing domain	18866350	18879582	+	19586	upstream
ENSMUSG00000106874.1	Gm20186	Annotated_lncRNA	18845910	18846763	-	ENSMUST00000201141	ENSMUSG00000044155	Lsm8	LSM domain||LSM domain, eukaryotic/archaea-type	18848668	18853747	+	1904	upstream
ENSMUSG00000096917.1	2500002B13Rik	Annotated_lncRNA	57488054	57508877	+	ENSMUST00000034022	ENSMUSG00000031609	Sap30	Histone deacetylase complex subunit SAP30 zinc-finger||Histone deacetylase complex subunit SAP30, Sin3 binding domain	57482707	57487860	-	193	upstream
ENSMUSG00000096917.1	2500002B13Rik	Annotated_lncRNA	57488054	57508877	+	ENSMUST00000034023	ENSMUSG00000031610	Scrg1	Scrapie-responsive protein 1	57455923	57477585	+	10468	downstream
ENSMUSG00000096917.1	2500002B13Rik	Annotated_lncRNA	57488054	57508877	+	ENSMUST00000067925	ENSMUSG00000054717	Hmgb2	High mobility group box domain||HMG box A DNA-binding domain, conserved site	57511843	57515999	+	2965	upstream
ENSMUSG00000096917.1	2500002B13Rik	Annotated_lncRNA	57488054	57508877	+	ENSMUST00000110316	ENSMUSG00000031608	Galnt7	Nucleotide-diphospho-sugar transferases||Glycosyltransferase 2-like||Ricin B, lectin domain	57524700	57653003	-	15822	downstream
ENSMUSG00000096917.1	2500002B13Rik	Annotated_lncRNA	57488054	57508877	+	ENSMUST00000034021	ENSMUSG00000031608	Galnt7	Nucleotide-diphospho-sugar transferases||Glycosyltransferase 2-like||Ricin B, lectin domain	57523828	57653031	-	14950	downstream
XLOC_015080	--	Novel_lncRNA	32174586	32182138	-	ENSMUST00000067458	ENSMUSG00000022231	Sema5a	Sema domain||Plexin repeat||Thrombospondin type-1 (TSP1) repeat||Plexin-like fold	32244813	32696341	+	62674	upstream
XLOC_015080	--	Novel_lncRNA	32174586	32182138	-	ENSMUST00000057633	ENSMUSG00000045267	Tas2r119	Taste receptor type 2	32177289	32178294	+	-1006	antisense
ENSMUSG00000108288.1	RP23-436D14.7	Annotated_lncRNA	81985748	81986743	-	ENSMUST00000032124	ENSMUSG00000030045	Mrpl19	Translation protein SH3-like domain||Ribosomal protein L19	81957851	81965958	-	19789	upstream
ENSMUSG00000108288.1	RP23-436D14.7	Annotated_lncRNA	81985748	81986743	-	ENSMUST00000150976	ENSMUSG00000035104	Eva1a	-	82041043	82091895	+	54299	upstream
ENSMUSG00000108288.1	RP23-436D14.7	Annotated_lncRNA	81985748	81986743	-	ENSMUST00000042974	ENSMUSG00000035104	Eva1a	-	82041623	82093099	+	54879	upstream
ENSMUSG00000108288.1	RP23-436D14.7	Annotated_lncRNA	81985748	81986743	-	ENSMUST00000203959	ENSMUSG00000035125	Gcfc2	-||GC-rich sequence DNA-binding factor domain	81946503	81958062	+	27685	downstream
ENSMUSG00000108288.1	RP23-436D14.7	Annotated_lncRNA	81985748	81986743	-	ENSMUST00000043195	ENSMUSG00000035125	Gcfc2	-||GC-rich sequence DNA-binding factor domain	81923669	81959915	+	25832	downstream
ENSMUSG00000108288.1	RP23-436D14.7	Annotated_lncRNA	81985748	81986743	-	ENSMUST00000149023	ENSMUSG00000035104	Eva1a	-	82052307	82092160	+	65563	upstream
ENSMUSG00000085175.7	Gm11423	Annotated_lncRNA	82779601	82781042	-	ENSMUST00000056677	ENSMUSG00000046010	Zfp830	Zinc finger, U1-type	82764345	82765935	+	13665	downstream
ENSMUSG00000085175.7	Gm11423	Annotated_lncRNA	82779601	82781042	-	ENSMUST00000173009	ENSMUSG00000020697	Lig3	DNA ligase, ATP-dependent, N-terminal||Zinc finger, PARP-type||DNA ligase, ATP-dependent, central||DNA ligase, ATP-dependent||BRCT domain||DNA ligase, ATP-dependent, C-terminal||DNA ligase, ATP-dependent, conserved site||Nucleic acid-binding, OB-fold	82781198	82790304	+	155	upstream
ENSMUSG00000085175.7	Gm11423	Annotated_lncRNA	82779601	82781042	-	ENSMUST00000021039	ENSMUSG00000020697	Lig3	DNA ligase, ATP-dependent, N-terminal||Zinc finger, PARP-type||DNA ligase, ATP-dependent, central||DNA ligase, ATP-dependent||BRCT domain||DNA ligase, ATP-dependent, C-terminal||DNA ligase, ATP-dependent, conserved site||Nucleic acid-binding, OB-fold	82781135	82804274	+	92	upstream
ENSMUSG00000085175.7	Gm11423	Annotated_lncRNA	82779601	82781042	-	ENSMUST00000173727	ENSMUSG00000020697	Lig3	DNA ligase, ATP-dependent, N-terminal||Zinc finger, PARP-type||DNA ligase, ATP-dependent, central||DNA ligase, ATP-dependent||BRCT domain||DNA ligase, ATP-dependent, C-terminal||DNA ligase, ATP-dependent, conserved site||Nucleic acid-binding, OB-fold	82781193	82802026	+	150	upstream
ENSMUSG00000085175.7	Gm11423	Annotated_lncRNA	82779601	82781042	-	ENSMUST00000173722	ENSMUSG00000020697	Lig3	DNA ligase, ATP-dependent, N-terminal||Zinc finger, PARP-type||DNA ligase, ATP-dependent, central||DNA ligase, ATP-dependent||BRCT domain||DNA ligase, ATP-dependent, C-terminal||DNA ligase, ATP-dependent, conserved site||Nucleic acid-binding, OB-fold	82781203	82804198	+	160	upstream
ENSMUSG00000085175.7	Gm11423	Annotated_lncRNA	82779601	82781042	-	ENSMUST00000021040	ENSMUSG00000020698	Cct6b	Chaperonin Cpn60/TCP-1 family||GroEL-like apical domain||Chaperonin TCP-1, conserved site||T-complex protein 1, zeta subunit||Chaperone tailless complex polypeptide 1 (TCP-1)	82719250	82764306	-	15294	upstream
ENSMUSG00000085175.7	Gm11423	Annotated_lncRNA	82779601	82781042	-	ENSMUST00000092849	ENSMUSG00000020697	Lig3	DNA ligase, ATP-dependent, N-terminal||Zinc finger, PARP-type||DNA ligase, ATP-dependent, central||DNA ligase, ATP-dependent||BRCT domain||DNA ligase, ATP-dependent, C-terminal||DNA ligase, ATP-dependent, conserved site||Nucleic acid-binding, OB-fold	82781108	82802862	+	65	upstream
ENSMUSG00000085175.7	Gm11423	Annotated_lncRNA	82779601	82781042	-	ENSMUST00000074515	ENSMUSG00000020696	Rffl	Zinc finger, RING-type||Zinc finger, FYVE/PHD-type	82802449	82829043	-	21406	downstream
ENSMUSG00000085175.7	Gm11423	Annotated_lncRNA	82779601	82781042	-	ENSMUST00000126660	ENSMUSG00000020696	Rffl	Zinc finger, RING-type||Zinc finger, FYVE/PHD-type	82812669	82846092	-	31626	downstream
ENSMUSG00000085175.7	Gm11423	Annotated_lncRNA	82779601	82781042	-	ENSMUST00000092844	ENSMUSG00000018841	Rad51d	DNA recombination and repair protein RecA-like, ATP-binding domain||KaiC-like domain||-||P-loop containing nucleoside triphosphate hydrolase||AAA+ ATPase domain||DNA recombination and repair protein Rad51, C-terminal||DNA recombination and repair protein, RecA-like	82878737	82890589	-	97694	downstream
ENSMUSG00000085175.7	Gm11423	Annotated_lncRNA	82779601	82781042	-	ENSMUST00000071152	ENSMUSG00000020696	Rffl	Zinc finger, RING-type||Zinc finger, FYVE/PHD-type	82803822	82871210	-	22779	downstream
ENSMUSG00000085175.7	Gm11423	Annotated_lncRNA	82779601	82781042	-	ENSMUST00000093975	ENSMUSG00000020696	Rffl	Zinc finger, RING-type||Zinc finger, FYVE/PHD-type	82803822	82870744	-	22779	downstream
ENSMUSG00000085175.7	Gm11423	Annotated_lncRNA	82779601	82781042	-	ENSMUST00000100722	ENSMUSG00000020698	Cct6b	Chaperonin Cpn60/TCP-1 family||GroEL-like apical domain||Chaperonin TCP-1, conserved site||T-complex protein 1, zeta subunit||Chaperone tailless complex polypeptide 1 (TCP-1)	82719250	82764321	-	15279	upstream
ENSMUSG00000085175.7	Gm11423	Annotated_lncRNA	82779601	82781042	-	ENSMUST00000103218	ENSMUSG00000020696	Rffl	Zinc finger, RING-type||Zinc finger, FYVE/PHD-type	82807422	82829043	-	26379	downstream
ENSMUSG00000085175.7	Gm11423	Annotated_lncRNA	82779601	82781042	-	ENSMUST00000108173	ENSMUSG00000020696	Rffl	Zinc finger, RING-type||Zinc finger, FYVE/PHD-type	82803822	82871210	-	22779	downstream
ENSMUSG00000085175.7	Gm11423	Annotated_lncRNA	82779601	82781042	-	ENSMUST00000080461	ENSMUSG00000020697	Lig3	DNA ligase, ATP-dependent, N-terminal||Zinc finger, PARP-type||DNA ligase, ATP-dependent, central||DNA ligase, ATP-dependent||BRCT domain||DNA ligase, ATP-dependent, C-terminal||DNA ligase, ATP-dependent, conserved site||Nucleic acid-binding, OB-fold	82781185	82800653	+	142	upstream
ENSMUSG00000085175.7	Gm11423	Annotated_lncRNA	82779601	82781042	-	ENSMUST00000173347	ENSMUSG00000020697	Lig3	DNA ligase, ATP-dependent, N-terminal||Zinc finger, PARP-type||DNA ligase, ATP-dependent, central||DNA ligase, ATP-dependent||BRCT domain||DNA ligase, ATP-dependent, C-terminal||DNA ligase, ATP-dependent, conserved site||Nucleic acid-binding, OB-fold	82781193	82802025	+	150	upstream
ENSMUSG00000085175.7	Gm11423	Annotated_lncRNA	82779601	82781042	-	ENSMUST00000172837	ENSMUSG00000020697	Lig3	DNA ligase, ATP-dependent, N-terminal||Zinc finger, PARP-type||DNA ligase, ATP-dependent, central||DNA ligase, ATP-dependent||BRCT domain||DNA ligase, ATP-dependent, C-terminal||DNA ligase, ATP-dependent, conserved site||Nucleic acid-binding, OB-fold	82798349	82804274	+	17306	upstream
ENSMUSG00000085175.7	Gm11423	Annotated_lncRNA	82779601	82781042	-	ENSMUST00000021033	ENSMUSG00000018841	Rad51d	DNA recombination and repair protein RecA-like, ATP-binding domain||KaiC-like domain||-||P-loop containing nucleoside triphosphate hydrolase||AAA+ ATPase domain||DNA recombination and repair protein Rad51, C-terminal||DNA recombination and repair protein, RecA-like	82878737	82890589	-	97694	downstream
ENSMUSG00000085175.7	Gm11423	Annotated_lncRNA	82779601	82781042	-	ENSMUST00000021036	ENSMUSG00000020696	Rffl	Zinc finger, RING-type||Zinc finger, FYVE/PHD-type	82805607	82829031	-	24564	downstream
ENSMUSG00000085175.7	Gm11423	Annotated_lncRNA	82779601	82781042	-	ENSMUST00000018985	ENSMUSG00000018841	Rad51d	DNA recombination and repair protein RecA-like, ATP-binding domain||KaiC-like domain||-||P-loop containing nucleoside triphosphate hydrolase||AAA+ ATPase domain||DNA recombination and repair protein Rad51, C-terminal||DNA recombination and repair protein, RecA-like	82876699	82890614	-	95656	downstream
ENSMUSG00000085175.7	Gm11423	Annotated_lncRNA	82779601	82781042	-	ENSMUST00000131537	ENSMUSG00000020697	Lig3	DNA ligase, ATP-dependent, N-terminal||Zinc finger, PARP-type||DNA ligase, ATP-dependent, central||DNA ligase, ATP-dependent||BRCT domain||DNA ligase, ATP-dependent, C-terminal||DNA ligase, ATP-dependent, conserved site||Nucleic acid-binding, OB-fold	82781198	82790305	+	155	upstream
XLOC_003691	--	Novel_lncRNA	70340304	70347510	+	ENSMUST00000173042	ENSMUSG00000043259	Fam13c	-	70440880	70558729	+	93369	upstream
XLOC_003691	--	Novel_lncRNA	70340304	70347510	+	ENSMUST00000105436	ENSMUSG00000043259	Fam13c	-	70440668	70558729	+	93157	upstream
XLOC_003691	--	Novel_lncRNA	70340304	70347510	+	ENSMUST00000046807	ENSMUSG00000037762	Slc16a9	Major facilitator superfamily||Major facilitator superfamily domain	70245100	70285968	+	54335	downstream
XLOC_003691	--	Novel_lncRNA	70340304	70347510	+	ENSMUST00000062883	ENSMUSG00000043259	Fam13c	-	70440926	70558731	+	93415	upstream
XLOC_007288	--	Novel_lncRNA	68818657	68819974	-	ENSMUST00000167436	ENSMUSG00000060938	Rpl26	Ribosomal protein L26/L24P, eukaryotic/archaeal||Ribosomal protein L24/L26, conserved site||Translation protein SH3-like domain||KOW	68901635	68904533	+	81660	upstream
XLOC_007288	--	Novel_lncRNA	68818657	68819974	-	ENSMUST00000101014	ENSMUSG00000060938	Rpl26	Ribosomal protein L26/L24P, eukaryotic/archaeal||Ribosomal protein L24/L26, conserved site||Translation protein SH3-like domain||KOW	68901610	68904510	+	81635	upstream
XLOC_007288	--	Novel_lncRNA	68818657	68819974	-	ENSMUST00000101017	ENSMUSG00000018736	Ndel1	NUDE protein, C-terminal	68829303	68871858	-	9328	downstream
XLOC_007288	--	Novel_lncRNA	68818657	68819974	-	ENSMUST00000108673	ENSMUSG00000020900	Myh10	Myosin, N-terminal, SH3-like||P-loop containing nucleoside triphosphate hydrolase||Myosin head, motor domain||Myosin tail||Myosin S1 fragment, N-terminal||IQ motif, EF-hand binding site	68692081	68746483	+	72173	downstream
XLOC_007288	--	Novel_lncRNA	68818657	68819974	-	ENSMUST00000108672	ENSMUSG00000018736	Ndel1	NUDE protein, C-terminal	68829318	68853041	-	9343	downstream
XLOC_007288	--	Novel_lncRNA	68818657	68819974	-	ENSMUST00000128952	ENSMUSG00000060938	Rpl26	Ribosomal protein L26/L24P, eukaryotic/archaeal||Ribosomal protein L24/L26, conserved site||Translation protein SH3-like domain||KOW	68901627	68903319	+	81652	upstream
XLOC_007288	--	Novel_lncRNA	68818657	68819974	-	ENSMUST00000018880	ENSMUSG00000018736	Ndel1	NUDE protein, C-terminal	68821434	68853135	-	1459	downstream
XLOC_007288	--	Novel_lncRNA	68818657	68819974	-	ENSMUST00000018887	ENSMUSG00000020900	Myh10	Myosin, N-terminal, SH3-like||P-loop containing nucleoside triphosphate hydrolase||Myosin head, motor domain||Myosin tail||Myosin S1 fragment, N-terminal||IQ motif, EF-hand binding site	68692112	68816612	+	2044	downstream
XLOC_007288	--	Novel_lncRNA	68818657	68819974	-	ENSMUST00000092984	ENSMUSG00000020900	Myh10	Myosin, N-terminal, SH3-like||P-loop containing nucleoside triphosphate hydrolase||Myosin head, motor domain||Myosin tail||Myosin S1 fragment, N-terminal||IQ motif, EF-hand binding site	68692316	68816624	+	2032	downstream
XLOC_007288	--	Novel_lncRNA	68818657	68819974	-	ENSMUST00000102611	ENSMUSG00000020900	Myh10	Myosin, N-terminal, SH3-like||P-loop containing nucleoside triphosphate hydrolase||Myosin head, motor domain||Myosin tail||Myosin S1 fragment, N-terminal||IQ motif, EF-hand binding site	68691915	68816632	+	2024	downstream
XLOC_007288	--	Novel_lncRNA	68818657	68819974	-	ENSMUST00000065213	ENSMUSG00000046490	Rnf222	Zinc finger, RING-type, conserved site||Zinc finger, RING-type	68888553	68895777	+	68578	upstream
XLOC_007288	--	Novel_lncRNA	68818657	68819974	-	ENSMUST00000073471	ENSMUSG00000060938	Rpl26	Ribosomal protein L26/L24P, eukaryotic/archaeal||Ribosomal protein L24/L26, conserved site||Translation protein SH3-like domain||KOW	68901583	68904534	+	81608	upstream
XLOC_008229	--	Novel_lncRNA	8521180	8577677	+	ENSMUST00000169750	ENSMUSG00000020594	Pum2	Pumilio RNA-binding repeat||Armadillo-type fold||-	8674736	8713630	+	97058	upstream
XLOC_008229	--	Novel_lncRNA	8521180	8577677	+	ENSMUST00000095863	ENSMUSG00000020600	Slc7a15	Amino acid/polyamine transporter I	8529345	8539545	-	-10201	antisense
XLOC_008229	--	Novel_lncRNA	8521180	8577677	+	ENSMUST00000163730	ENSMUSG00000020594	Pum2	Pumilio RNA-binding repeat||Armadillo-type fold||-	8674765	8713399	+	97087	upstream
XLOC_008229	--	Novel_lncRNA	8521180	8577677	+	ENSMUST00000020915	ENSMUSG00000020594	Pum2	Pumilio RNA-binding repeat||Armadillo-type fold||-	8674145	8750320	+	96467	upstream
XLOC_008229	--	Novel_lncRNA	8521180	8577677	+	ENSMUST00000067384	ENSMUSG00000054364	Rhob	P-loop containing nucleoside triphosphate hydrolase||Small GTP-binding protein domain||Small GTPase superfamily, Rho type||Small GTPase superfamily||Small GTPase superfamily, Ras type||Small GTPase superfamily, Rab type	8497763	8499985	-	21194	upstream
XLOC_008229	--	Novel_lncRNA	8521180	8577677	+	ENSMUST00000111123	ENSMUSG00000020594	Pum2	Pumilio RNA-binding repeat||Armadillo-type fold||-	8674134	8751454	+	96456	upstream
XLOC_008229	--	Novel_lncRNA	8521180	8577677	+	ENSMUST00000165657	ENSMUSG00000020600	Slc7a15	Amino acid/polyamine transporter I	8529345	8539545	-	-10201	antisense
XLOC_008229	--	Novel_lncRNA	8521180	8577677	+	ENSMUST00000169089	ENSMUSG00000020594	Pum2	Pumilio RNA-binding repeat||Armadillo-type fold||-	8674470	8750028	+	96792	upstream
XLOC_008229	--	Novel_lncRNA	8521180	8577677	+	ENSMUST00000178015	ENSMUSG00000020594	Pum2	Pumilio RNA-binding repeat||Armadillo-type fold||-	8674134	8752581	+	96456	upstream
XLOC_008229	--	Novel_lncRNA	8521180	8577677	+	ENSMUST00000166965	ENSMUSG00000020594	Pum2	Pumilio RNA-binding repeat||Armadillo-type fold||-	8677534	8709490	+	99856	upstream
XLOC_008229	--	Novel_lncRNA	8521180	8577677	+	ENSMUST00000168361	ENSMUSG00000020594	Pum2	Pumilio RNA-binding repeat||Armadillo-type fold||-	8674681	8752581	+	97003	upstream
XLOC_008229	--	Novel_lncRNA	8521180	8577677	+	ENSMUST00000036938	ENSMUSG00000020600	Slc7a15	Amino acid/polyamine transporter I	8528483	8599066	-	-49195	antisense
XLOC_008229	--	Novel_lncRNA	8521180	8577677	+	ENSMUST00000111122	ENSMUSG00000020594	Pum2	Pumilio RNA-binding repeat||Armadillo-type fold||-	8674224	8752561	+	96546	upstream
XLOC_008229	--	Novel_lncRNA	8521180	8577677	+	ENSMUST00000163569	ENSMUSG00000020594	Pum2	Pumilio RNA-binding repeat||Armadillo-type fold||-	8674421	8750001	+	96743	upstream
XLOC_023063	--	Novel_lncRNA	166194588	166203054	+	ENSMUST00000109249	ENSMUSG00000006800	Sulf2	Sulfatase, conserved site||Sulfatase||Alkaline-phosphatase-like, core domain||Extracellular sulfatase, C-terminal||Extracellular sulfatase	166073089	166155663	-	38924	upstream
XLOC_023063	--	Novel_lncRNA	166194588	166203054	+	ENSMUST00000088086	ENSMUSG00000006800	Sulf2	Sulfatase, conserved site||Sulfatase||Alkaline-phosphatase-like, core domain||Extracellular sulfatase, C-terminal||Extracellular sulfatase	166073920	166155285	-	39302	upstream
XLOC_022182	--	Novel_lncRNA	86018366	86039901	+	ENSMUST00000079298	ENSMUSG00000102091	Olfr1034	Olfactory receptor||GPCR, rhodopsin-like, 7TM||G protein-coupled receptor, rhodopsin-like	86046484	86047416	+	6582	upstream
XLOC_022182	--	Novel_lncRNA	86018366	86039901	+	ENSMUST00000099911	ENSMUSG00000075205	Olfr1037	GPCR, rhodopsin-like, 7TM||G protein-coupled receptor, rhodopsin-like||Olfactory receptor	86084810	86085775	-	44908	downstream
XLOC_022182	--	Novel_lncRNA	86018366	86039901	+	ENSMUST00000050942	ENSMUSG00000043267	Olfr1031	GPCR, rhodopsin-like, 7TM||G protein-coupled receptor, rhodopsin-like||Olfactory receptor	85991819	85992829	+	25536	downstream
XLOC_022182	--	Novel_lncRNA	86018366	86039901	+	ENSMUST00000077055	ENSMUSG00000058884	Olfr1025-ps1	Olfactory receptor||G protein-coupled receptor, rhodopsin-like||GPCR, rhodopsin-like, 7TM	85917927	85918865	+	99500	downstream
XLOC_022182	--	Novel_lncRNA	86018366	86039901	+	ENSMUST00000164985	ENSMUSG00000099820	Olfr1036	Olfactory receptor||G protein-coupled receptor, rhodopsin-like||GPCR, rhodopsin-like, 7TM	86074742	86075674	+	34840	upstream
XLOC_022182	--	Novel_lncRNA	86018366	86039901	+	ENSMUST00000111589	ENSMUSG00000045392	Olfr1033	GPCR, rhodopsin-like, 7TM||G protein-coupled receptor, rhodopsin-like||Olfactory receptor	86041317	86042249	+	1415	upstream
XLOC_022182	--	Novel_lncRNA	86018366	86039901	+	ENSMUST00000188749	ENSMUSG00000058884	Olfr1025-ps1	Olfactory receptor||G protein-coupled receptor, rhodopsin-like||GPCR, rhodopsin-like, 7TM	85917927	85918847	+	99518	downstream
XLOC_022182	--	Novel_lncRNA	86018366	86039901	+	ENSMUST00000056849	ENSMUSG00000044923	Olfr1030	Olfactory receptor||G protein-coupled receptor, rhodopsin-like||GPCR, rhodopsin-like, 7TM	85983842	85984798	+	33567	downstream
XLOC_022182	--	Novel_lncRNA	86018366	86039901	+	ENSMUST00000062166	ENSMUSG00000042796	Olfr1032	Olfactory receptor||G protein-coupled receptor, rhodopsin-like||GPCR, rhodopsin-like, 7TM	86007778	86008710	+	9655	downstream
XLOC_022182	--	Novel_lncRNA	86018366	86039901	+	ENSMUST00000080698	ENSMUSG00000057207	Olfr1028	Olfactory receptor||GPCR, rhodopsin-like, 7TM||G protein-coupled receptor, rhodopsin-like	85951065	85952039	+	66326	downstream
XLOC_022182	--	Novel_lncRNA	86018366	86039901	+	ENSMUST00000099910	ENSMUSG00000075204	Olfr1039	Olfactory receptor||G protein-coupled receptor, rhodopsin-like||GPCR, rhodopsin-like, 7TM	86130702	86131661	-	90800	downstream
XLOC_022182	--	Novel_lncRNA	86018366	86039901	+	ENSMUST00000056718	ENSMUSG00000042863	Olfr1026	GPCR, rhodopsin-like, 7TM||G protein-coupled receptor, rhodopsin-like||Olfactory receptor	85923270	85924193	+	94172	downstream
XLOC_022182	--	Novel_lncRNA	86018366	86039901	+	ENSMUST00000082191	ENSMUSG00000059873	Olfr1029	G protein-coupled receptor, rhodopsin-like||GPCR, rhodopsin-like, 7TM||Olfactory receptor	85975245	85976219	+	42146	downstream
XLOC_008443	--	Novel_lncRNA	30849443	30855371	+	ENSMUST00000020997	ENSMUSG00000020669	Sh3yl1	SH3 domain||Ysc84 actin-binding domain	30911668	30960162	+	56296	upstream
XLOC_008443	--	Novel_lncRNA	30849443	30855371	+	ENSMUST00000067087	ENSMUSG00000054204	Fam150b	FAM150	30884322	30893854	+	28950	upstream
XLOC_008443	--	Novel_lncRNA	30849443	30855371	+	ENSMUST00000062740	ENSMUSG00000044573	Acp1	Phosphotyrosine protein phosphatase I superfamily||Protein-tyrosine phosphatase, low molecular weight, mammalian||Protein-tyrosine phosphatase, low molecular weight	30893326	30911612	-	37954	downstream
XLOC_008443	--	Novel_lncRNA	30849443	30855371	+	ENSMUST00000074038	ENSMUSG00000044573	Acp1	Phosphotyrosine protein phosphatase I superfamily||Protein-tyrosine phosphatase, low molecular weight, mammalian||Protein-tyrosine phosphatase, low molecular weight	30893326	30911612	-	37954	downstream
XLOC_008443	--	Novel_lncRNA	30849443	30855371	+	ENSMUST00000110880	ENSMUSG00000020669	Sh3yl1	SH3 domain||Ysc84 actin-binding domain	30911692	30960151	+	56320	upstream
ENSMUSG00000096972.7	Gm26883	Annotated_lncRNA	169633646	169888503	-	ENSMUST00000109159	ENSMUSG00000047907	Tshz2	Homeobox domain||Homeodomain-like||Zinc finger, C2H2-like||Zinc finger, C2H2	169633013	169913093	+	-254858	antisense
ENSMUSG00000096972.7	Gm26883	Annotated_lncRNA	169633646	169888503	-	ENSMUST00000109157	ENSMUSG00000047907	Tshz2	Homeobox domain||Homeodomain-like||Zinc finger, C2H2-like||Zinc finger, C2H2	169633676	169888504	+	-254828	antisense
ENSMUSG00000096972.7	Gm26883	Annotated_lncRNA	169633646	169888503	-	ENSMUST00000123300	ENSMUSG00000047907	Tshz2	Homeobox domain||Homeodomain-like||Zinc finger, C2H2-like||Zinc finger, C2H2	169884893	170071816	+	-3611	antisense
ENSMUSG00000096972.7	Gm26883	Annotated_lncRNA	169633646	169888503	-	ENSMUST00000109160	ENSMUSG00000078912	Gm11011	-	169582845	169587745	-	45900	upstream
ENSMUSG00000096972.7	Gm26883	Annotated_lncRNA	169633646	169888503	-	ENSMUST00000185239	ENSMUSG00000047907	Tshz2	Homeobox domain||Homeodomain-like||Zinc finger, C2H2-like||Zinc finger, C2H2	169884893	170071816	+	-3611	antisense
ENSMUSG00000096972.7	Gm26883	Annotated_lncRNA	169633646	169888503	-	ENSMUST00000140699	ENSMUSG00000047907	Tshz2	Homeobox domain||Homeodomain-like||Zinc finger, C2H2-like||Zinc finger, C2H2	169885835	169913093	+	-2669	antisense
XLOC_000118	--	Novel_lncRNA	38104	41528	-	ENSMUST00000179505	ENSMUSG00000095041	PISD	-	52190	59667	-	10661	downstream
XLOC_000118	--	Novel_lncRNA	38104	41528	-	ENSMUST00000178343	ENSMUSG00000095041	PISD	-	52691	59690	-	11162	downstream
ENSMUSG00000097815.1	Gm26809	Annotated_lncRNA	18844220	18847360	+	ENSMUST00000056398	ENSMUSG00000044155	Lsm8	LSM domain||LSM domain, eukaryotic/archaea-type	18848579	18854053	+	1218	upstream
ENSMUSG00000097815.1	Gm26809	Annotated_lncRNA	18844220	18847360	+	ENSMUST00000031489	ENSMUSG00000029517	Ankrd7	Ankyrin repeat||Ankyrin repeat-containing domain	18866318	18879586	+	18957	upstream
ENSMUSG00000097815.1	Gm26809	Annotated_lncRNA	18844220	18847360	+	ENSMUST00000115396	ENSMUSG00000029517	Ankrd7	Ankyrin repeat||Ankyrin repeat-containing domain	18866350	18879582	+	18989	upstream
ENSMUSG00000097815.1	Gm26809	Annotated_lncRNA	18844220	18847360	+	ENSMUST00000201141	ENSMUSG00000044155	Lsm8	LSM domain||LSM domain, eukaryotic/archaea-type	18848668	18853747	+	1307	upstream
ENSMUSG00000097789.1	Gm2115	Annotated_lncRNA	84528975	84578337	+	ENSMUST00000128460	ENSMUSG00000030630	Fah	Fumarylacetoacetase, C-terminal-related||Fumarylacetoacetase, N-terminal||Fumarylacetoacetase	84595529	84606722	-	17191	downstream
ENSMUSG00000097789.1	Gm2115	Annotated_lncRNA	84528975	84578337	+	ENSMUST00000032865	ENSMUSG00000030630	Fah	Fumarylacetoacetase, C-terminal-related||Fumarylacetoacetase, N-terminal||Fumarylacetoacetase	84585159	84605827	-	6821	downstream
ENSMUSG00000097789.1	Gm2115	Annotated_lncRNA	84528975	84578337	+	ENSMUST00000178385	ENSMUSG00000030629	Zfand6	Zinc finger, AN1-type||Zinc finger, A20-type	84615054	84679361	-	36716	downstream
ENSMUSG00000097789.1	Gm2115	Annotated_lncRNA	84528975	84578337	+	ENSMUST00000069537	ENSMUSG00000030629	Zfand6	Zinc finger, AN1-type||Zinc finger, A20-type	84615054	84679351	-	36716	downstream
XLOC_047972	--	Novel_lncRNA	150486075	150514738	-	ENSMUST00000112715	ENSMUSG00000025270	Alas2	Pyridoxal phosphate-dependent transferase||5-aminolevulinate synthase presequence||Aminotransferase, class-II, pyridoxal-phosphate binding site||Tetrapyrrole biosynthesis, 5-aminolevulinic acid synthase||Aminotransferase, class I/classII	150547459	150570622	+	32720	upstream
XLOC_047972	--	Novel_lncRNA	150486075	150514738	-	ENSMUST00000112713	ENSMUSG00000025271	Pfkfb1	Fructose-2,6-bisphosphatase||Histidine phosphatase superfamily, clade-1||Histidine phosphatase superfamily||Phosphoglycerate/bisphosphoglycerate mutase, active site||6-phosphofructo-2-kinase||P-loop containing nucleoside triphosphate hydrolase	150594478	150643878	+	79739	upstream
XLOC_047972	--	Novel_lncRNA	150486075	150514738	-	ENSMUST00000140207	ENSMUSG00000025269	Apex2	Endonuclease/exonuclease/phosphatase||AP endonuclease 1, binding site||Zinc finger, GRF-type||AP endonuclease 1	150572549	150588071	-	57810	downstream
XLOC_047972	--	Novel_lncRNA	150486075	150514738	-	ENSMUST00000080884	ENSMUSG00000025271	Pfkfb1	Fructose-2,6-bisphosphatase||Histidine phosphatase superfamily, clade-1||Histidine phosphatase superfamily||Phosphoglycerate/bisphosphoglycerate mutase, active site||6-phosphofructo-2-kinase||P-loop containing nucleoside triphosphate hydrolase	150589921	150643878	+	75182	upstream
XLOC_047972	--	Novel_lncRNA	150486075	150514738	-	ENSMUST00000059256	ENSMUSG00000041353	Tmem29	Protein FAM104||Developmental pluripotency-associated protein 3	150397773	150441137	-	44937	upstream
XLOC_047972	--	Novel_lncRNA	150486075	150514738	-	ENSMUST00000026303	ENSMUSG00000025269	Apex2	Endonuclease/exonuclease/phosphatase||AP endonuclease 1, binding site||Zinc finger, GRF-type||AP endonuclease 1	150571508	150588149	-	56769	downstream
XLOC_047972	--	Novel_lncRNA	150486075	150514738	-	ENSMUST00000173996	ENSMUSG00000041353	Tmem29	Protein FAM104||Developmental pluripotency-associated protein 3	150397773	150459150	-	26924	upstream
XLOC_047972	--	Novel_lncRNA	150486075	150514738	-	ENSMUST00000112719	ENSMUSG00000025269	Apex2	Endonuclease/exonuclease/phosphatase||AP endonuclease 1, binding site||Zinc finger, GRF-type||AP endonuclease 1	150584137	150588081	-	69398	downstream
XLOC_047972	--	Novel_lncRNA	150486075	150514738	-	ENSMUST00000153221	ENSMUSG00000025271	Pfkfb1	Fructose-2,6-bisphosphatase||Histidine phosphatase superfamily, clade-1||Histidine phosphatase superfamily||Phosphoglycerate/bisphosphoglycerate mutase, active site||6-phosphofructo-2-kinase||P-loop containing nucleoside triphosphate hydrolase	150588229	150625183	+	73490	upstream
XLOC_047972	--	Novel_lncRNA	150486075	150514738	-	ENSMUST00000163233	ENSMUSG00000041353	Tmem29	Protein FAM104||Developmental pluripotency-associated protein 3	150408584	150440905	-	45169	upstream
XLOC_047972	--	Novel_lncRNA	150486075	150514738	-	ENSMUST00000112727	ENSMUSG00000025269	Apex2	Endonuclease/exonuclease/phosphatase||AP endonuclease 1, binding site||Zinc finger, GRF-type||AP endonuclease 1	150520352	150588082	-	5613	downstream
XLOC_047972	--	Novel_lncRNA	150486075	150514738	-	ENSMUST00000066337	ENSMUSG00000025270	Alas2	Pyridoxal phosphate-dependent transferase||5-aminolevulinate synthase presequence||Aminotransferase, class-II, pyridoxal-phosphate binding site||Tetrapyrrole biosynthesis, 5-aminolevulinic acid synthase||Aminotransferase, class I/classII	150547375	150570638	+	32636	upstream
XLOC_047972	--	Novel_lncRNA	150486075	150514738	-	ENSMUST00000112725	ENSMUSG00000025269	Apex2	Endonuclease/exonuclease/phosphatase||AP endonuclease 1, binding site||Zinc finger, GRF-type||AP endonuclease 1	150519519	150589844	-	4780	downstream
XLOC_047972	--	Novel_lncRNA	150486075	150514738	-	ENSMUST00000112720	ENSMUSG00000025269	Apex2	Endonuclease/exonuclease/phosphatase||AP endonuclease 1, binding site||Zinc finger, GRF-type||AP endonuclease 1	150568862	150589844	-	54123	downstream
XLOC_047972	--	Novel_lncRNA	150486075	150514738	-	ENSMUST00000112721	ENSMUSG00000025269	Apex2	Endonuclease/exonuclease/phosphatase||AP endonuclease 1, binding site||Zinc finger, GRF-type||AP endonuclease 1	150571508	150588096	-	56769	downstream
XLOC_041242	--	Novel_lncRNA	12749237	12752581	+	ENSMUST00000132974	ENSMUSG00000031441	Atp11a	P-type ATPase, A domain||P-type ATPase, phosphorylation site||-||P-type ATPase, cytoplasmic domain N||P-type ATPase, subfamily IV||P-type ATPase||HAD-like domain	12835165	12868667	+	82583	upstream
XLOC_041242	--	Novel_lncRNA	12749237	12752581	+	ENSMUST00000000776	ENSMUSG00000000759	Tubgcp3	Gamma-tubulin complex component protein||-	12614277	12672248	-	76988	upstream
XLOC_041242	--	Novel_lncRNA	12749237	12752581	+	ENSMUST00000091237	ENSMUSG00000031441	Atp11a	P-type ATPase, A domain||P-type ATPase, phosphorylation site||-||P-type ATPase, cytoplasmic domain N||P-type ATPase, subfamily IV||P-type ATPase||HAD-like domain	12757016	12868728	+	4434	upstream
XLOC_041242	--	Novel_lncRNA	12749237	12752581	+	ENSMUST00000033818	ENSMUSG00000031441	Atp11a	P-type ATPase, A domain||P-type ATPase, phosphorylation site||-||P-type ATPase, cytoplasmic domain N||P-type ATPase, subfamily IV||P-type ATPase||HAD-like domain	12757014	12868728	+	4432	upstream
XLOC_041242	--	Novel_lncRNA	12749237	12752581	+	ENSMUST00000152273	ENSMUSG00000031441	Atp11a	P-type ATPase, A domain||P-type ATPase, phosphorylation site||-||P-type ATPase, cytoplasmic domain N||P-type ATPase, subfamily IV||P-type ATPase||HAD-like domain	12847855	12857270	+	95273	upstream
XLOC_041208	--	Novel_lncRNA	8781718	8793611	+	ENSMUST00000048545	ENSMUSG00000040459	Arglu1	-	8666577	8690537	-	91180	upstream
XLOC_041223	--	Novel_lncRNA	10690029	10692145	+	ENSMUST00000042103	ENSMUSG00000039057	Myo16	Ankyrin repeat-containing domain||Myosin head, motor domain||P-loop containing nucleoside triphosphate hydrolase||IQ motif, EF-hand binding site||Ankyrin repeat	10272572	10634741	+	55287	downstream
XLOC_029595	--	Novel_lncRNA	10939793	10943535	-	ENSMUST00000137891	ENSMUSG00000049969	Plekhf2	Zinc finger, FYVE-related||Pleckstrin homology domain||FYVE zinc finger||Zinc finger, FYVE/PHD-type	10990749	11007927	-	47213	downstream
XLOC_029595	--	Novel_lncRNA	10939793	10943535	-	ENSMUST00000080517	ENSMUSG00000059482	2610301B20Rik	C8orf37 protein	10874498	10899421	+	40371	downstream
XLOC_029595	--	Novel_lncRNA	10939793	10943535	-	ENSMUST00000054776	ENSMUSG00000049969	Plekhf2	Zinc finger, FYVE-related||Pleckstrin homology domain||FYVE zinc finger||Zinc finger, FYVE/PHD-type	10988662	11007676	-	45126	downstream
XLOC_029595	--	Novel_lncRNA	10939793	10943535	-	ENSMUST00000101504	ENSMUSG00000059482	2610301B20Rik	C8orf37 protein	10874568	10899425	+	40367	downstream
XLOC_023140	--	Novel_lncRNA	174019248	174022284	+	ENSMUST00000134876	ENSMUSG00000027522	Stx16	t-SNARE||Target SNARE coiled-coil homology domain||Syntaxin, N-terminal domain||Syntaxin/epimorphin, conserved site||-	174076318	174090734	+	54033	upstream
XLOC_023140	--	Novel_lncRNA	174019248	174022284	+	ENSMUST00000156054	ENSMUSG00000027522	Stx16	t-SNARE||Target SNARE coiled-coil homology domain||Syntaxin, N-terminal domain||Syntaxin/epimorphin, conserved site||-	174077066	174096967	+	54781	upstream
XLOC_023140	--	Novel_lncRNA	174019248	174022284	+	ENSMUST00000147038	ENSMUSG00000027522	Stx16	t-SNARE||Target SNARE coiled-coil homology domain||Syntaxin, N-terminal domain||Syntaxin/epimorphin, conserved site||-	174076322	174093526	+	54037	upstream
XLOC_023140	--	Novel_lncRNA	174019248	174022284	+	ENSMUST00000044415	ENSMUSG00000039263	Npepl1	Leucine aminopeptidase/peptidase B||Peptidase M17, leucyl aminopeptidase, C-terminal	174110349	174123070	+	88064	upstream
XLOC_023140	--	Novel_lncRNA	174019248	174022284	+	ENSMUST00000044638	ENSMUSG00000027522	Stx16	t-SNARE||Target SNARE coiled-coil homology domain||Syntaxin, N-terminal domain||Syntaxin/epimorphin, conserved site||-	174077058	174099770	+	54773	upstream
XLOC_023140	--	Novel_lncRNA	174019248	174022284	+	ENSMUST00000155000	ENSMUSG00000027522	Stx16	t-SNARE||Target SNARE coiled-coil homology domain||Syntaxin, N-terminal domain||Syntaxin/epimorphin, conserved site||-	174076308	174092433	+	54023	upstream
XLOC_023140	--	Novel_lncRNA	174019248	174022284	+	ENSMUST00000087908	ENSMUSG00000027522	Stx16	t-SNARE||Target SNARE coiled-coil homology domain||Syntaxin, N-terminal domain||Syntaxin/epimorphin, conserved site||-	174076922	174099771	+	54637	upstream
XLOC_023394	--	Novel_lncRNA	22871741	22878907	-	ENSMUST00000153931	ENSMUSG00000058835	Abi1	SH3 domain||Abl-interactor, homeo-domain homologous domain||Target SNARE coiled-coil homology domain	22940364	23040104	-	61456	downstream
XLOC_023394	--	Novel_lncRNA	22871741	22878907	-	ENSMUST00000123948	ENSMUSG00000058835	Abi1	SH3 domain||Abl-interactor, homeo-domain homologous domain||Target SNARE coiled-coil homology domain	22940308	23040122	-	61400	downstream
XLOC_023394	--	Novel_lncRNA	22871741	22878907	-	ENSMUST00000140164	ENSMUSG00000058835	Abi1	SH3 domain||Abl-interactor, homeo-domain homologous domain||Target SNARE coiled-coil homology domain	22940073	23040241	-	61165	downstream
XLOC_023394	--	Novel_lncRNA	22871741	22878907	-	ENSMUST00000126112	ENSMUSG00000058835	Abi1	SH3 domain||Abl-interactor, homeo-domain homologous domain||Target SNARE coiled-coil homology domain	22940073	23040195	-	61165	downstream
XLOC_023394	--	Novel_lncRNA	22871741	22878907	-	ENSMUST00000139038	ENSMUSG00000058835	Abi1	SH3 domain||Abl-interactor, homeo-domain homologous domain||Target SNARE coiled-coil homology domain	22940364	23040187	-	61456	downstream
XLOC_023394	--	Novel_lncRNA	22871741	22878907	-	ENSMUST00000149719	ENSMUSG00000058835	Abi1	SH3 domain||Abl-interactor, homeo-domain homologous domain||Target SNARE coiled-coil homology domain	22940086	23040241	-	61178	downstream
XLOC_023394	--	Novel_lncRNA	22871741	22878907	-	ENSMUST00000152170	ENSMUSG00000026784	Pdss1	Polyprenyl synthetase||-||Isoprenoid synthase domain	22895595	22916213	+	16687	upstream
XLOC_023394	--	Novel_lncRNA	22871741	22878907	-	ENSMUST00000053729	ENSMUSG00000026784	Pdss1	Polyprenyl synthetase||-||Isoprenoid synthase domain	22895522	22940266	+	16614	upstream
XLOC_023394	--	Novel_lncRNA	22871741	22878907	-	ENSMUST00000091394	ENSMUSG00000058835	Abi1	SH3 domain||Abl-interactor, homeo-domain homologous domain||Target SNARE coiled-coil homology domain	22940364	23040137	-	61456	downstream
XLOC_023394	--	Novel_lncRNA	22871741	22878907	-	ENSMUST00000093171	ENSMUSG00000058835	Abi1	SH3 domain||Abl-interactor, homeo-domain homologous domain||Target SNARE coiled-coil homology domain	22940892	23040140	-	61984	downstream
XLOC_023394	--	Novel_lncRNA	22871741	22878907	-	ENSMUST00000178908	ENSMUSG00000058835	Abi1	SH3 domain||Abl-interactor, homeo-domain homologous domain||Target SNARE coiled-coil homology domain	22941233	23040219	-	62325	downstream
XLOC_023394	--	Novel_lncRNA	22871741	22878907	-	ENSMUST00000014290	ENSMUSG00000026786	Apbb1ip	Ras-associating (RA) domain||Pleckstrin homology domain||Ubiquitin-related domain	22774094	22875653	+	-3913	antisense
XLOC_023394	--	Novel_lncRNA	22871741	22878907	-	ENSMUST00000078977	ENSMUSG00000058835	Abi1	SH3 domain||Abl-interactor, homeo-domain homologous domain||Target SNARE coiled-coil homology domain	22940369	23040230	-	61461	downstream
XLOC_023394	--	Novel_lncRNA	22871741	22878907	-	ENSMUST00000114544	ENSMUSG00000058835	Abi1	SH3 domain||Abl-interactor, homeo-domain homologous domain||Target SNARE coiled-coil homology domain	22940369	23040185	-	61461	downstream
XLOC_023394	--	Novel_lncRNA	22871741	22878907	-	ENSMUST00000141215	ENSMUSG00000026784	Pdss1	Polyprenyl synthetase||-||Isoprenoid synthase domain	22896048	22906824	+	17140	upstream
XLOC_028885	--	Novel_lncRNA	114331360	114337156	+	ENSMUST00000164297	ENSMUSG00000057977	Skint11	-||CD80-like, immunoglobulin C2-set||Immunoglobulin-like domain	114163384	114245028	+	86331	downstream
XLOC_028885	--	Novel_lncRNA	114331360	114337156	+	ENSMUST00000079915	ENSMUSG00000057977	Skint11	-||CD80-like, immunoglobulin C2-set||Immunoglobulin-like domain	114163384	114245028	+	86331	downstream
XLOC_028885	--	Novel_lncRNA	114331360	114337156	+	ENSMUST00000094894	ENSMUSG00000070867	Trabd2b	Pheromone shutdown, TraB	114406724	114615098	+	69567	upstream
XLOC_017101	--	Novel_lncRNA	95188756	95197696	-	ENSMUST00000125847	ENSMUSG00000062609	Kcnj15	Immunoglobulin E-set||Potassium channel, inwardly rectifying, Kir||-||Potassium channel, inwardly rectifying, Kir1.3	95257659	95295704	+	59962	upstream
XLOC_017101	--	Novel_lncRNA	95188756	95197696	-	ENSMUST00000140222	ENSMUSG00000062609	Kcnj15	Immunoglobulin E-set||Potassium channel, inwardly rectifying, Kir||-||Potassium channel, inwardly rectifying, Kir1.3	95257683	95295681	+	59986	upstream
XLOC_017101	--	Novel_lncRNA	95188756	95197696	-	ENSMUST00000113858	ENSMUSG00000062609	Kcnj15	Immunoglobulin E-set||Potassium channel, inwardly rectifying, Kir||-||Potassium channel, inwardly rectifying, Kir1.3	95258252	95300211	+	60555	upstream
XLOC_017101	--	Novel_lncRNA	95188756	95197696	-	ENSMUST00000113856	ENSMUSG00000062609	Kcnj15	Immunoglobulin E-set||Potassium channel, inwardly rectifying, Kir||-||Potassium channel, inwardly rectifying, Kir1.3	95257651	95300260	+	59954	upstream
XLOC_017101	--	Novel_lncRNA	95188756	95197696	-	ENSMUST00000113855	ENSMUSG00000062609	Kcnj15	Immunoglobulin E-set||Potassium channel, inwardly rectifying, Kir||-||Potassium channel, inwardly rectifying, Kir1.3	95257558	95300211	+	59861	upstream
XLOC_017101	--	Novel_lncRNA	95188756	95197696	-	ENSMUST00000037154	ENSMUSG00000062609	Kcnj15	Immunoglobulin E-set||Potassium channel, inwardly rectifying, Kir||-||Potassium channel, inwardly rectifying, Kir1.3	95257558	95300211	+	59861	upstream
XLOC_017101	--	Novel_lncRNA	95188756	95197696	-	ENSMUST00000134166	ENSMUSG00000062609	Kcnj15	Immunoglobulin E-set||Potassium channel, inwardly rectifying, Kir||-||Potassium channel, inwardly rectifying, Kir1.3	95257659	95296039	+	59962	upstream
XLOC_017101	--	Novel_lncRNA	95188756	95197696	-	ENSMUST00000113854	ENSMUSG00000062609	Kcnj15	Immunoglobulin E-set||Potassium channel, inwardly rectifying, Kir||-||Potassium channel, inwardly rectifying, Kir1.3	95257558	95299623	+	59861	upstream
XLOC_017101	--	Novel_lncRNA	95188756	95197696	-	ENSMUST00000138329	ENSMUSG00000062609	Kcnj15	Immunoglobulin E-set||Potassium channel, inwardly rectifying, Kir||-||Potassium channel, inwardly rectifying, Kir1.3	95279193	95291897	+	81496	upstream
XLOC_017101	--	Novel_lncRNA	95188756	95197696	-	ENSMUST00000113862	ENSMUSG00000062609	Kcnj15	Immunoglobulin E-set||Potassium channel, inwardly rectifying, Kir||-||Potassium channel, inwardly rectifying, Kir1.3	95257558	95300211	+	59861	upstream
XLOC_017101	--	Novel_lncRNA	95188756	95197696	-	ENSMUST00000113861	ENSMUSG00000062609	Kcnj15	Immunoglobulin E-set||Potassium channel, inwardly rectifying, Kir||-||Potassium channel, inwardly rectifying, Kir1.3	95257558	95298507	+	59861	upstream
XLOC_017101	--	Novel_lncRNA	95188756	95197696	-	ENSMUST00000113859	ENSMUSG00000062609	Kcnj15	Immunoglobulin E-set||Potassium channel, inwardly rectifying, Kir||-||Potassium channel, inwardly rectifying, Kir1.3	95258036	95300211	+	60339	upstream
XLOC_009256	--	Novel_lncRNA	32748683	32770899	-	ENSMUST00000020886	ENSMUSG00000020572	Nampt	Nicotinate phosphoribosyltransferase family||Quinolinate phosphoribosyl transferase, C-terminal||Nicotinamide phosphoribosyl transferase	32820335	32853369	+	49435	upstream
ENSMUSG00000103765.1	Gm37857	Annotated_lncRNA	93393698	93394896	+	ENSMUST00000093774	ENSMUSG00000041991	Hrnr	S100/Calbindin-D9k, conserved site||S100/CaBP-9k-type, calcium binding, subdomain||EF-Hand 1, calcium-binding site||EF-hand domain	93319749	93333570	+	60127	downstream
ENSMUSG00000103765.1	Gm37857	Annotated_lncRNA	93393698	93394896	+	ENSMUST00000090856	ENSMUSG00000041991	Hrnr	S100/Calbindin-D9k, conserved site||S100/CaBP-9k-type, calcium binding, subdomain||EF-Hand 1, calcium-binding site||EF-hand domain	93319749	93333570	+	60127	downstream
ENSMUSG00000103765.1	Gm37857	Annotated_lncRNA	93393698	93394896	+	ENSMUST00000045912	ENSMUSG00000041984	Rptn	EF-hand domain||EF-Hand 1, calcium-binding site||S100/CaBP-9k-type, calcium binding, subdomain||S100/Calbindin-D9k, conserved site	93393699	93399442	+	-1198	sense_overlapping
ENSMUSG00000103765.1	Gm37857	Annotated_lncRNA	93393698	93394896	+	ENSMUST00000029516	ENSMUSG00000027908	Tchhl1	EF-hand domain||S100/CaBP-9k-type, calcium binding, subdomain	93468754	93471980	+	73857	upstream
ENSMUSG00000103765.1	Gm37857	Annotated_lncRNA	93393698	93394896	+	ENSMUST00000064257	ENSMUSG00000052415	Tchh	S100/CaBP-9k-type, calcium binding, subdomain||EF-Hand 1, calcium-binding site||EF-hand domain	93442330	93449077	+	47433	upstream
ENSMUSG00000091542.1	Gm17167	Annotated_lncRNA	42206998	42235313	+	ENSMUST00000178864	ENSMUSG00000095675	Ccl21b	Chemokine interleukin-8-like domain	42255767	42256432	+	20453	upstream
ENSMUSG00000091542.1	Gm17167	Annotated_lncRNA	42206998	42235313	+	ENSMUST00000178192	ENSMUSG00000093996	Fam205a3	Domain of unknown function DUF4599	42318334	42323929	+	83020	upstream
ENSMUSG00000091542.1	Gm17167	Annotated_lncRNA	42206998	42235313	+	ENSMUST00000117202	ENSMUSG00000083929	Gm10600	-	42240639	42242685	+	5325	upstream
ENSMUSG00000091542.1	Gm17167	Annotated_lncRNA	42206998	42235313	+	ENSMUST00000098121	ENSMUSG00000073876	Gm13305	Immunoglobulin-like domain||Immunoglobulin||Long hematopoietin receptor, soluble alpha chain, conserved site||Fibronectin type III||Immunoglobulin subtype	42158842	42168603	-	38394	upstream
ENSMUSG00000091542.1	Gm17167	Annotated_lncRNA	42206998	42235313	+	ENSMUST00000098123	ENSMUSG00000073878	Gm13304	Chemokine interleukin-8-like domain	42114817	42115917	+	91080	downstream
ENSMUSG00000091542.1	Gm17167	Annotated_lncRNA	42206998	42235313	+	ENSMUST00000098122	ENSMUSG00000073877	Gm13306	Chemokine interleukin-8-like domain	42158092	42158839	+	48158	downstream
ENSMUSG00000091542.1	Gm17167	Annotated_lncRNA	42206998	42235313	+	ENSMUST00000108002	ENSMUSG00000094695	Gm21953	-	42294267	42294855	+	58953	upstream
ENSMUSG00000091542.1	Gm17167	Annotated_lncRNA	42206998	42235313	+	ENSMUST00000108018	ENSMUSG00000073877	Gm13306	Chemokine interleukin-8-like domain	42154040	42158835	+	48162	downstream
ENSMUSG00000084923.1	Gm15611	Annotated_lncRNA	8998402	8999669	-	ENSMUST00000003717	ENSMUSG00000042476	Abcb4	ABC transporter type 1, transmembrane domain||ABC transporter-like||P-loop containing nucleoside triphosphate hydrolase||AAA+ ATPase domain||ABC transporter, conserved site	8893717	8959226	+	39175	downstream
ENSMUSG00000084923.1	Gm15611	Annotated_lncRNA	8998402	8999669	-	ENSMUST00000196067	ENSMUSG00000042476	Abcb4	ABC transporter type 1, transmembrane domain||ABC transporter-like||P-loop containing nucleoside triphosphate hydrolase||AAA+ ATPase domain||ABC transporter, conserved site	8893949	8941087	+	57314	downstream
ENSMUSG00000084923.1	Gm15611	Annotated_lncRNA	8998402	8999669	-	ENSMUST00000003720	ENSMUSG00000003623	Crot	Acyltransferase ChoActase/COT/CPT	8966033	8997324	-	1077	upstream
XLOC_026673	--	Novel_lncRNA	16013706	16014705	-	ENSMUST00000108347	ENSMUSG00000078780	Gm5150	Immunoglobulin subtype||Immunoglobulin V-set domain||Immunoglobulin-like domain	15948070	16006332	-	7373	upstream
XLOC_026673	--	Novel_lncRNA	16013706	16014705	-	ENSMUST00000194367	ENSMUSG00000078780	Gm5150	Immunoglobulin subtype||Immunoglobulin V-set domain||Immunoglobulin-like domain	15946870	16006437	-	7268	upstream
XLOC_020481	--	Novel_lncRNA	36359225	36363325	+	ENSMUST00000071267	ENSMUSG00000024805	Pcgf5	Zinc finger, RING-type, conserved site||Zinc finger, RING-type||Zinc finger, C3HC4 RING-type	36379067	36456192	+	15741	upstream
XLOC_020481	--	Novel_lncRNA	36359225	36363325	+	ENSMUST00000062389	ENSMUSG00000024805	Pcgf5	Zinc finger, RING-type, conserved site||Zinc finger, RING-type||Zinc finger, C3HC4 RING-type	36409748	36456192	+	46422	upstream
XLOC_020702	--	Novel_lncRNA	3981655	3986389	-	ENSMUST00000133474	ENSMUSG00000037916	Ndufv1	NADH ubiquinone oxidoreductase, F subunit||Soluble ligand binding domain||NADH-ubiquinone oxidoreductase 51 kDa subunit, FMN-binding domain||NADH-ubiquinone oxidoreductase 51 kDa subunit, iron-sulphur binding domain||NADH:ubiquinone oxidoreductase, 51kDa subunit, conserved site	4009367	4012708	-	22977	downstream
XLOC_020702	--	Novel_lncRNA	3981655	3986389	-	ENSMUST00000001801	ENSMUSG00000001750	Tcirg1	ATPase, V0 complex, subunit 116kDa, eukaryotic||-||V-type ATPase, V0 complex, 116kDa subunit family	3896050	3907133	-	74521	upstream
XLOC_020702	--	Novel_lncRNA	3981655	3986389	-	ENSMUST00000128787	ENSMUSG00000037916	Ndufv1	NADH ubiquinone oxidoreductase, F subunit||Soluble ligand binding domain||NADH-ubiquinone oxidoreductase 51 kDa subunit, FMN-binding domain||NADH-ubiquinone oxidoreductase 51 kDa subunit, iron-sulphur binding domain||NADH:ubiquinone oxidoreductase, 51kDa subunit, conserved site	4007562	4012673	-	21172	downstream
XLOC_020702	--	Novel_lncRNA	3981655	3986389	-	ENSMUST00000025806	ENSMUSG00000024871	Doc2g	Synaptotagmin||Double C2 protein, alpha/beta/gamma||C2 domain	4003336	4007005	+	16946	upstream
XLOC_020702	--	Novel_lncRNA	3981655	3986389	-	ENSMUST00000169613	ENSMUSG00000060803	Gstp1	Glutathione S-transferase, N-terminal||Thioredoxin-like fold||Glutathione S-transferase, Pi class||Glutathione S-transferase, C-terminal||Glutathione S-transferase, C-terminal-like	4035407	4037921	-	49017	downstream
XLOC_020702	--	Novel_lncRNA	3981655	3986389	-	ENSMUST00000025802	ENSMUSG00000024869	Nudt8	NUDIX hydrolase domain-like||NUDIX hydrolase domain	4000580	4002103	+	14190	upstream
XLOC_020702	--	Novel_lncRNA	3981655	3986389	-	ENSMUST00000122924	ENSMUSG00000024869	Nudt8	NUDIX hydrolase domain-like||NUDIX hydrolase domain	4000631	4002101	+	14241	upstream
XLOC_020702	--	Novel_lncRNA	3981655	3986389	-	ENSMUST00000075092	ENSMUSG00000059734	Ndufs8	4Fe-4S ferredoxin, iron-sulphur binding, conserved site||4Fe-4S ferredoxin-type, iron-sulphur binding domain||NADH-quinone oxidoreductase, chain I	3908870	3912717	-	68937	upstream
XLOC_020702	--	Novel_lncRNA	3981655	3986389	-	ENSMUST00000076451	ENSMUSG00000058216	BC021614	Glutathione S-transferase, C-terminal||Glutathione S-transferase, C-terminal-like||Thioredoxin-like fold||Glutathione S-transferase, N-terminal||Glutathione S-transferase, Pi class	4057478	4059295	-	71088	downstream
XLOC_020702	--	Novel_lncRNA	3981655	3986389	-	ENSMUST00000042700	ENSMUSG00000038155	Gstp2	Glutathione S-transferase, Pi class||Thioredoxin-like fold||Glutathione S-transferase, N-terminal||Glutathione S-transferase, C-terminal||Glutathione S-transferase, C-terminal-like	4040285	4042236	-	53895	downstream
XLOC_020702	--	Novel_lncRNA	3981655	3986389	-	ENSMUST00000159593	ENSMUSG00000024857	Cabp2	EF-Hand 1, calcium-binding site||EF-hand domain pair||EF-hand domain	4081578	4085676	+	95188	upstream
XLOC_020702	--	Novel_lncRNA	3981655	3986389	-	ENSMUST00000126070	ENSMUSG00000001750	Tcirg1	ATPase, V0 complex, subunit 116kDa, eukaryotic||-||V-type ATPase, V0 complex, 116kDa subunit family	3896050	3906991	-	74663	upstream
XLOC_020702	--	Novel_lncRNA	3981655	3986389	-	ENSMUST00000159556	ENSMUSG00000024857	Cabp2	EF-Hand 1, calcium-binding site||EF-hand domain pair||EF-hand domain	4083490	4087340	+	97100	upstream
XLOC_020702	--	Novel_lncRNA	3981655	3986389	-	ENSMUST00000025794	ENSMUSG00000037263	Aldh3b3	-||Aldehyde dehydrogenase, glutamic acid active site||Aldehyde/histidinol dehydrogenase||Aldehyde dehydrogenase, cysteine active site||Aldehyde dehydrogenase domain||Aldehyde dehydrogenase NAD(P)-dependent	3965900	3970438	+	11216	downstream
XLOC_020702	--	Novel_lncRNA	3981655	3986389	-	ENSMUST00000136921	ENSMUSG00000037916	Ndufv1	NADH ubiquinone oxidoreductase, F subunit||Soluble ligand binding domain||NADH-ubiquinone oxidoreductase 51 kDa subunit, FMN-binding domain||NADH-ubiquinone oxidoreductase 51 kDa subunit, iron-sulphur binding domain||NADH:ubiquinone oxidoreductase, 51kDa subunit, conserved site	4009462	4012759	-	23072	downstream
XLOC_020702	--	Novel_lncRNA	3981655	3986389	-	ENSMUST00000072055	ENSMUSG00000024843	Chka	-||Protein kinase-like domain	3851797	3894369	+	87285	downstream
XLOC_020702	--	Novel_lncRNA	3981655	3986389	-	ENSMUST00000145791	ENSMUSG00000001750	Tcirg1	ATPase, V0 complex, subunit 116kDa, eukaryotic||-||V-type ATPase, V0 complex, 116kDa subunit family	3896050	3905230	-	76424	upstream
XLOC_020702	--	Novel_lncRNA	3981655	3986389	-	ENSMUST00000054030	ENSMUSG00000024866	Acy3	Aspartoacylase||Succinylglutamate desuccinylase/aspartoacylase	3986661	3990007	+	271	upstream
XLOC_020702	--	Novel_lncRNA	3981655	3986389	-	ENSMUST00000134479	ENSMUSG00000037916	Ndufv1	NADH ubiquinone oxidoreductase, F subunit||Soluble ligand binding domain||NADH-ubiquinone oxidoreductase 51 kDa subunit, FMN-binding domain||NADH-ubiquinone oxidoreductase 51 kDa subunit, iron-sulphur binding domain||NADH:ubiquinone oxidoreductase, 51kDa subunit, conserved site	4007497	4012666	-	21107	downstream
XLOC_020702	--	Novel_lncRNA	3981655	3986389	-	ENSMUST00000125640	ENSMUSG00000024843	Chka	-||Protein kinase-like domain	3852363	3887450	+	94204	downstream
XLOC_020702	--	Novel_lncRNA	3981655	3986389	-	ENSMUST00000179433	ENSMUSG00000037263	Aldh3b3	-||Aldehyde dehydrogenase, glutamic acid active site||Aldehyde/histidinol dehydrogenase||Aldehyde dehydrogenase, cysteine active site||Aldehyde dehydrogenase domain||Aldehyde dehydrogenase NAD(P)-dependent	3958645	3972103	+	9551	downstream
XLOC_020702	--	Novel_lncRNA	3981655	3986389	-	ENSMUST00000051803	ENSMUSG00000024885	Aldh3b1	Aldehyde/histidinol dehydrogenase||Aldehyde dehydrogenase, cysteine active site||Aldehyde dehydrogenase, glutamic acid active site||Aldehyde dehydrogenase NAD(P)-dependent||Aldehyde dehydrogenase domain	3913493	3929761	-	51893	upstream
XLOC_020702	--	Novel_lncRNA	3981655	3986389	-	ENSMUST00000162708	ENSMUSG00000036908	Unc93b1	Ion channel regulatory protein, UNC-93	3935186	3949340	+	32314	downstream
XLOC_020702	--	Novel_lncRNA	3981655	3986389	-	ENSMUST00000143380	ENSMUSG00000075296	Aldh3b2	Aldehyde dehydrogenase, glutamic acid active site||Aldehyde/histidinol dehydrogenase||Aldehyde dehydrogenase, cysteine active site||Aldehyde dehydrogenase domain||Aldehyde dehydrogenase NAD(P)-dependent	3972328	3981645	+	9	downstream
XLOC_020702	--	Novel_lncRNA	3981655	3986389	-	ENSMUST00000162908	ENSMUSG00000024857	Cabp2	EF-Hand 1, calcium-binding site||EF-hand domain pair||EF-hand domain	4083519	4087340	+	97129	upstream
XLOC_020702	--	Novel_lncRNA	3981655	3986389	-	ENSMUST00000025760	ENSMUSG00000024843	Chka	-||Protein kinase-like domain	3852076	3894364	+	87290	downstream
XLOC_020702	--	Novel_lncRNA	3981655	3986389	-	ENSMUST00000041871	ENSMUSG00000037477	Tbx10	Transcription factor, T-box||Transcription factor, T-box, conserved site||p53-like transcription factor, DNA-binding	3992752	3999511	+	6362	upstream
XLOC_020702	--	Novel_lncRNA	3981655	3986389	-	ENSMUST00000042497	ENSMUSG00000037916	Ndufv1	NADH ubiquinone oxidoreductase, F subunit||Soluble ligand binding domain||NADH-ubiquinone oxidoreductase 51 kDa subunit, FMN-binding domain||NADH-ubiquinone oxidoreductase 51 kDa subunit, iron-sulphur binding domain||NADH:ubiquinone oxidoreductase, 51kDa subunit, conserved site	4007497	4012806	-	21107	downstream
XLOC_020702	--	Novel_lncRNA	3981655	3986389	-	ENSMUST00000159148	ENSMUSG00000024857	Cabp2	EF-Hand 1, calcium-binding site||EF-hand domain pair||EF-hand domain	4082488	4087336	+	96098	upstream
XLOC_020702	--	Novel_lncRNA	3981655	3986389	-	ENSMUST00000189808	ENSMUSG00000058216	BC021614	Glutathione S-transferase, C-terminal||Glutathione S-transferase, C-terminal-like||Thioredoxin-like fold||Glutathione S-transferase, N-terminal||Glutathione S-transferase, Pi class	4057477	4059446	-	71087	downstream
XLOC_020702	--	Novel_lncRNA	3981655	3986389	-	ENSMUST00000165711	ENSMUSG00000036908	Unc93b1	Ion channel regulatory protein, UNC-93	3935186	3949339	+	32315	downstream
ENSMUSG00000078122.4	F630028O10Rik	Annotated_lncRNA	96239966	96243636	+	ENSMUST00000119035	ENSMUSG00000045802	Hsf3	Heat shock factor (HSF)-type, DNA-binding	96306178	96456294	-	62541	downstream
ENSMUSG00000078122.4	F630028O10Rik	Annotated_lncRNA	96239966	96243636	+	ENSMUST00000059003	ENSMUSG00000045802	Hsf3	Heat shock factor (HSF)-type, DNA-binding	96307523	96367919	-	63886	downstream
ENSMUSG00000078122.4	F630028O10Rik	Annotated_lncRNA	96239966	96243636	+	ENSMUST00000179832	ENSMUSG00000045802	Hsf3	Heat shock factor (HSF)-type, DNA-binding	96306867	96357240	-	63230	downstream
ENSMUSG00000078122.4	F630028O10Rik	Annotated_lncRNA	96239966	96243636	+	ENSMUST00000164693	ENSMUSG00000045802	Hsf3	Heat shock factor (HSF)-type, DNA-binding	96307365	96456283	-	63728	downstream
ENSMUSG00000078122.4	F630028O10Rik	Annotated_lncRNA	96239966	96243636	+	ENSMUST00000050707	ENSMUSG00000044206	Vsig4	Immunoglobulin V-set domain||Immunoglobulin subtype||Immunoglobulin-like domain	96247203	96293438	-	3566	downstream
ENSMUSG00000078122.4	F630028O10Rik	Annotated_lncRNA	96239966	96243636	+	ENSMUST00000117399	ENSMUSG00000031207	Msn	Band 4.1 domain||FERM, N-terminal||Ezrin/radixin/moesin, C-terminal||Ezrin/radixin/moesin||Ezrin/radixin/moesin-like||Ubiquitin-related domain||FERM conserved site||FERM central domain||FERM, C-terminal PH-like domain||FERM domain	96096042	96168552	+	71413	downstream
ENSMUSG00000105961.1	Gm42754	Annotated_lncRNA	108226787	108240247	+	ENSMUST00000090569	ENSMUSG00000068749	Psma5	Nucleophile aminohydrolases, N-terminal||Proteasome A-type subunit||Proteasome, subunit alpha/beta||Proteasome alpha-subunit, N-terminal domain	108256926	108279974	+	16678	upstream
ENSMUSG00000105961.1	Gm42754	Annotated_lncRNA	108226787	108240247	+	ENSMUST00000065664	ENSMUSG00000048796	Cyb561d1	Cytochrome b561 domain||Cytochrome b561/ferric reductase transmembrane	108195771	108200834	-	25952	upstream
ENSMUSG00000105961.1	Gm42754	Annotated_lncRNA	108226787	108240247	+	ENSMUST00000119650	ENSMUSG00000048997	Atxn7l2	-||SCA7 domain	108202240	108210466	-	16320	upstream
ENSMUSG00000105961.1	Gm42754	Annotated_lncRNA	108226787	108240247	+	ENSMUST00000106655	ENSMUSG00000048796	Cyb561d1	Cytochrome b561 domain||Cytochrome b561/ferric reductase transmembrane	108195687	108200834	-	25952	upstream
ENSMUSG00000105961.1	Gm42754	Annotated_lncRNA	108226787	108240247	+	ENSMUST00000117784	ENSMUSG00000048997	Atxn7l2	-||SCA7 domain	108202228	108210462	-	16324	upstream
ENSMUSG00000105961.1	Gm42754	Annotated_lncRNA	108226787	108240247	+	ENSMUST00000000001	ENSMUSG00000000001	Gnai3	Guanine nucleotide binding protein (G-protein), alpha subunit||G protein alpha subunit, helical insertion||G-protein alpha subunit, group I||P-loop containing nucleoside triphosphate hydrolase	108107280	108146146	-	80640	upstream
ENSMUSG00000105961.1	Gm42754	Annotated_lncRNA	108226787	108240247	+	ENSMUST00000106661	ENSMUSG00000050947	Amigo1	Leucine-rich repeat, typical subtype||Immunoglobulin subtype 2||Immunoglobulin-like domain||Immunoglobulin I-set||Immunoglobulin subtype||Cysteine-rich flanking region, C-terminal||Leucine-rich repeat	108188043	108191775	+	35011	downstream
ENSMUSG00000105961.1	Gm42754	Annotated_lncRNA	108226787	108240247	+	ENSMUST00000102632	ENSMUSG00000068747	Sort1	VPS10	108284091	108361511	+	43843	upstream
ENSMUSG00000105961.1	Gm42754	Annotated_lncRNA	108226787	108240247	+	ENSMUST00000102633	ENSMUSG00000048997	Atxn7l2	-||SCA7 domain	108202222	108210934	-	15852	upstream
ENSMUSG00000105961.1	Gm42754	Annotated_lncRNA	108226787	108240247	+	ENSMUST00000155782	ENSMUSG00000050947	Amigo1	Leucine-rich repeat, typical subtype||Immunoglobulin subtype 2||Immunoglobulin-like domain||Immunoglobulin I-set||Immunoglobulin subtype||Cysteine-rich flanking region, C-terminal||Leucine-rich repeat	108188101	108191767	+	35019	downstream
ENSMUSG00000105961.1	Gm42754	Annotated_lncRNA	108226787	108240247	+	ENSMUST00000062028	ENSMUSG00000046793	Gpr61	G protein-coupled receptor, rhodopsin-like||GPCR, rhodopsin-like, 7TM	108148321	108154882	-	71904	upstream
ENSMUSG00000105961.1	Gm42754	Annotated_lncRNA	108226787	108240247	+	ENSMUST00000050909	ENSMUSG00000050947	Amigo1	Leucine-rich repeat, typical subtype||Immunoglobulin subtype 2||Immunoglobulin-like domain||Immunoglobulin I-set||Immunoglobulin subtype||Cysteine-rich flanking region, C-terminal||Leucine-rich repeat	108186335	108191776	+	35010	downstream
ENSMUSG00000105961.1	Gm42754	Annotated_lncRNA	108226787	108240247	+	ENSMUST00000106654	ENSMUSG00000048796	Cyb561d1	Cytochrome b561 domain||Cytochrome b561/ferric reductase transmembrane	108198273	108200595	-	26191	upstream
ENSMUSG00000105961.1	Gm42754	Annotated_lncRNA	108226787	108240247	+	ENSMUST00000141387	ENSMUSG00000027887	Sypl2	Synaptophysin/synaptoporin||Marvel domain	108211472	108226648	-	138	upstream
ENSMUSG00000105961.1	Gm42754	Annotated_lncRNA	108226787	108240247	+	ENSMUST00000117409	ENSMUSG00000048997	Atxn7l2	-||SCA7 domain	108202222	108210486	-	16300	upstream
ENSMUSG00000105961.1	Gm42754	Annotated_lncRNA	108226787	108240247	+	ENSMUST00000106659	ENSMUSG00000050947	Amigo1	Leucine-rich repeat, typical subtype||Immunoglobulin subtype 2||Immunoglobulin-like domain||Immunoglobulin I-set||Immunoglobulin subtype||Cysteine-rich flanking region, C-terminal||Leucine-rich repeat	108186350	108191777	+	35009	downstream
ENSMUSG00000105961.1	Gm42754	Annotated_lncRNA	108226787	108240247	+	ENSMUST00000127157	ENSMUSG00000048997	Atxn7l2	-||SCA7 domain	108207082	108209571	-	17215	upstream
ENSMUSG00000105961.1	Gm42754	Annotated_lncRNA	108226787	108240247	+	ENSMUST00000135636	ENSMUSG00000068747	Sort1	VPS10	108284082	108361443	+	43834	upstream
ENSMUSG00000105961.1	Gm42754	Annotated_lncRNA	108226787	108240247	+	ENSMUST00000106656	ENSMUSG00000050947	Amigo1	Leucine-rich repeat, typical subtype||Immunoglobulin subtype 2||Immunoglobulin-like domain||Immunoglobulin I-set||Immunoglobulin subtype||Cysteine-rich flanking region, C-terminal||Leucine-rich repeat	108186358	108192286	+	34500	downstream
ENSMUSG00000105985.1	Gm42993	Annotated_lncRNA	132015610	132022934	-	ENSMUST00000185450	ENSMUSG00000029673	Auts2	-||Autism susceptibility gene 2 protein	132030909	132050409	-	7974	downstream
ENSMUSG00000105985.1	Gm42993	Annotated_lncRNA	132015610	132022934	-	ENSMUST00000160135	ENSMUSG00000029673	Auts2	-||Autism susceptibility gene 2 protein	132030990	132449360	-	8055	downstream
XLOC_030393	--	Novel_lncRNA	114326600	114333579	-	ENSMUST00000164297	ENSMUSG00000057977	Skint11	-||CD80-like, immunoglobulin C2-set||Immunoglobulin-like domain	114163384	114245028	+	81571	downstream
XLOC_030393	--	Novel_lncRNA	114326600	114333579	-	ENSMUST00000094894	ENSMUSG00000070867	Trabd2b	Pheromone shutdown, TraB	114406724	114615098	+	73144	upstream
XLOC_030393	--	Novel_lncRNA	114326600	114333579	-	ENSMUST00000079915	ENSMUSG00000057977	Skint11	-||CD80-like, immunoglobulin C2-set||Immunoglobulin-like domain	114163384	114245028	+	81571	downstream
XLOC_030393	--	Novel_lncRNA	114326600	114333579	-	ENSMUST00000151810	ENSMUSG00000057977	Skint11	-||CD80-like, immunoglobulin C2-set||Immunoglobulin-like domain	114163465	114228871	+	97728	downstream
XLOC_030393	--	Novel_lncRNA	114326600	114333579	-	ENSMUST00000145797	ENSMUSG00000057977	Skint11	-||CD80-like, immunoglobulin C2-set||Immunoglobulin-like domain	114163465	114228809	+	97790	downstream
XLOC_031759	--	Novel_lncRNA	87509415	87526605	+	ENSMUST00000031201	ENSMUSG00000029272	Sult1e1	Sulfotransferase domain||P-loop containing nucleoside triphosphate hydrolase	87575969	87591594	-	49363	downstream
XLOC_031759	--	Novel_lncRNA	87509415	87526605	+	ENSMUST00000144144	ENSMUSG00000029268	Ugt2a2	UDP-glucuronosyl/UDP-glucosyltransferase	87460359	87482260	-	27154	upstream
XLOC_031759	--	Novel_lncRNA	87509415	87526605	+	ENSMUST00000120150	ENSMUSG00000029269	Sult1b1	Sulfotransferase domain||P-loop containing nucleoside triphosphate hydrolase	87514689	87535146	-	-11917	antisense
XLOC_031759	--	Novel_lncRNA	87509415	87526605	+	ENSMUST00000031199	ENSMUSG00000029269	Sult1b1	Sulfotransferase domain||P-loop containing nucleoside triphosphate hydrolase	87513339	87538195	-	-13267	antisense
XLOC_031759	--	Novel_lncRNA	87509415	87526605	+	ENSMUST00000117455	ENSMUSG00000029269	Sult1b1	Sulfotransferase domain||P-loop containing nucleoside triphosphate hydrolase	87513366	87536222	-	-13240	antisense
XLOC_031759	--	Novel_lncRNA	87509415	87526605	+	ENSMUST00000113314	ENSMUSG00000029273	Sult1d1	Sulfotransferase domain||P-loop containing nucleoside triphosphate hydrolase	87554645	87569027	-	28039	downstream
XLOC_031759	--	Novel_lncRNA	87509415	87526605	+	ENSMUST00000079811	ENSMUSG00000029268	Ugt2a2	UDP-glucuronosyl/UDP-glucosyltransferase	87459490	87482258	-	27156	upstream
XLOC_031759	--	Novel_lncRNA	87509415	87526605	+	ENSMUST00000072818	ENSMUSG00000061906	Ugt2b38	UDP-glucuronosyl/UDP-glucosyltransferase	87409942	87424203	-	85211	upstream
XLOC_031759	--	Novel_lncRNA	87509415	87526605	+	ENSMUST00000201519	ENSMUSG00000107180	Gm43638	UDP-glucuronosyl/UDP-glucosyltransferase	87460240	87486806	-	22608	upstream
XLOC_031759	--	Novel_lncRNA	87509415	87526605	+	ENSMUST00000147854	ENSMUSG00000106677	Ugt2a1	UDP-glucuronosyl/UDP-glucosyltransferase	87459490	87490871	-	18543	upstream
XLOC_031797	--	Novel_lncRNA	89254449	89265797	+	ENSMUST00000156238	ENSMUSG00000060961	Slc4a4	Band 3 cytoplasmic domain||Bicarbonate transporter, eukaryotic||Bicarbonate transporter, C-terminal||Phosphotransferase/anion transporter||Sodium bicarbonate cotransporter||-	88887299	89235794	+	18654	downstream
XLOC_031797	--	Novel_lncRNA	89254449	89265797	+	ENSMUST00000113218	ENSMUSG00000060961	Slc4a4	Band 3 cytoplasmic domain||Bicarbonate transporter, eukaryotic||Bicarbonate transporter, C-terminal||Phosphotransferase/anion transporter||Sodium bicarbonate cotransporter||-	88887297	89234867	+	19581	downstream
XLOC_031797	--	Novel_lncRNA	89254449	89265797	+	ENSMUST00000130041	ENSMUSG00000060961	Slc4a4	Band 3 cytoplasmic domain||Bicarbonate transporter, eukaryotic||Bicarbonate transporter, C-terminal||Phosphotransferase/anion transporter||Sodium bicarbonate cotransporter||-	89027966	89234861	+	19587	downstream
XLOC_031797	--	Novel_lncRNA	89254449	89265797	+	ENSMUST00000148750	ENSMUSG00000060961	Slc4a4	Band 3 cytoplasmic domain||Bicarbonate transporter, eukaryotic||Bicarbonate transporter, C-terminal||Phosphotransferase/anion transporter||Sodium bicarbonate cotransporter||-	88886818	89239653	+	14795	downstream
ENSMUSG00000104607.1	Gm43202	Annotated_lncRNA	116200408	116202713	+	ENSMUST00000106491	ENSMUSG00000033502	Cdc14a	Dual specificity phosphatase, catalytic domain||Tyrosine specific protein phosphatases domain||Protein-tyrosine phosphatase, active site||Dual specificity/tyrosine protein phosphatase, N-terminal||Protein-tyrosine phosphatase-like||Protein-tyrosine phosphatase, catalytic||Dual specificity protein phosphatase domain	116272553	116423986	-	69839	downstream
ENSMUSG00000104607.1	Gm43202	Annotated_lncRNA	116200408	116202713	+	ENSMUST00000029574	ENSMUSG00000027962	Vcam1	Intercellular adhesion molecule/vascular cell adhesion molecule, N-terminal||Immunoglobulin subtype||Immunoglobulin C2-set||Vascular cell adhesion molecule-1||Immunoglobulin I-set||Immunoglobulin-like domain||Immunoglobulin subtype 2	116109949	116129688	-	70719	upstream
ENSMUSG00000104607.1	Gm43202	Annotated_lncRNA	116200408	116202713	+	ENSMUST00000090464	ENSMUSG00000033502	Cdc14a	Dual specificity phosphatase, catalytic domain||Tyrosine specific protein phosphatases domain||Protein-tyrosine phosphatase, active site||Dual specificity/tyrosine protein phosphatase, N-terminal||Protein-tyrosine phosphatase-like||Protein-tyrosine phosphatase, catalytic||Dual specificity protein phosphatase domain	116272553	116424032	-	69839	downstream
ENSMUSG00000104607.1	Gm43202	Annotated_lncRNA	116200408	116202713	+	ENSMUST00000196309	ENSMUSG00000027962	Vcam1	Intercellular adhesion molecule/vascular cell adhesion molecule, N-terminal||Immunoglobulin subtype||Immunoglobulin C2-set||Vascular cell adhesion molecule-1||Immunoglobulin I-set||Immunoglobulin-like domain||Immunoglobulin subtype 2	116124618	116128928	-	71479	upstream
ENSMUSG00000104607.1	Gm43202	Annotated_lncRNA	116200408	116202713	+	ENSMUST00000090473	ENSMUSG00000068696	Gpr88	-||G protein-coupled receptor, rhodopsin-like||GPCR, rhodopsin-like, 7TM	116249654	116253503	-	46940	downstream
ENSMUSG00000104607.1	Gm43202	Annotated_lncRNA	116200408	116202713	+	ENSMUST00000197759	ENSMUSG00000068696	Gpr88	-||G protein-coupled receptor, rhodopsin-like||GPCR, rhodopsin-like, 7TM	116252563	116253089	-	49849	downstream
ENSMUSG00000104607.1	Gm43202	Annotated_lncRNA	116200408	116202713	+	ENSMUST00000196449	ENSMUSG00000027962	Vcam1	Intercellular adhesion molecule/vascular cell adhesion molecule, N-terminal||Immunoglobulin subtype||Immunoglobulin C2-set||Vascular cell adhesion molecule-1||Immunoglobulin I-set||Immunoglobulin-like domain||Immunoglobulin subtype 2	116122280	116129457	-	70950	upstream
ENSMUSG00000101609.1	Kcnq1ot1	Annotated_lncRNA	143212155	143296549	-	ENSMUST00000186488	ENSMUSG00000009545	Kcnq1	-||Potassium channel||Potassium channel, voltage dependent, KCNQ, C-terminal||Potassium channel, voltage dependent, KCNQ1||Potassium channel, voltage dependent, KCNQ||Ion transport domain	143106362	143149537	+	62617	downstream
ENSMUSG00000101609.1	Kcnq1ot1	Annotated_lncRNA	143212155	143296549	-	ENSMUST00000009689	ENSMUSG00000009545	Kcnq1	-||Potassium channel||Potassium channel, voltage dependent, KCNQ, C-terminal||Potassium channel, voltage dependent, KCNQ1||Potassium channel, voltage dependent, KCNQ||Ion transport domain	143107254	143427042	+	-84395	antisense
ENSMUSG00000101609.1	Kcnq1ot1	Annotated_lncRNA	143212155	143296549	-	ENSMUST00000186288	ENSMUSG00000009545	Kcnq1	-||Potassium channel||Potassium channel, voltage dependent, KCNQ, C-terminal||Potassium channel, voltage dependent, KCNQ1||Potassium channel, voltage dependent, KCNQ||Ion transport domain	143106515	143149537	+	62617	downstream
ENSMUSG00000101609.1	Kcnq1ot1	Annotated_lncRNA	143212155	143296549	-	ENSMUST00000185383	ENSMUSG00000009545	Kcnq1	-||Potassium channel||Potassium channel, voltage dependent, KCNQ, C-terminal||Potassium channel, voltage dependent, KCNQ1||Potassium channel, voltage dependent, KCNQ||Ion transport domain	143107551	143426125	+	-84395	antisense
ENSMUSG00000101609.1	Kcnq1ot1	Annotated_lncRNA	143212155	143296549	-	ENSMUST00000186284	ENSMUSG00000009545	Kcnq1	-||Potassium channel||Potassium channel, voltage dependent, KCNQ, C-terminal||Potassium channel, voltage dependent, KCNQ1||Potassium channel, voltage dependent, KCNQ||Ion transport domain	143108351	143149537	+	62617	downstream
ENSMUSG00000101609.1	Kcnq1ot1	Annotated_lncRNA	143212155	143296549	-	ENSMUST00000186798	ENSMUSG00000009545	Kcnq1	-||Potassium channel||Potassium channel, voltage dependent, KCNQ, C-terminal||Potassium channel, voltage dependent, KCNQ1||Potassium channel, voltage dependent, KCNQ||Ion transport domain	143106745	143149537	+	62617	downstream
ENSMUSG00000101609.1	Kcnq1ot1	Annotated_lncRNA	143212155	143296549	-	ENSMUST00000187213	ENSMUSG00000009545	Kcnq1	-||Potassium channel||Potassium channel, voltage dependent, KCNQ, C-terminal||Potassium channel, voltage dependent, KCNQ1||Potassium channel, voltage dependent, KCNQ||Ion transport domain	143109194	143149537	+	62617	downstream
ENSMUSG00000084854.1	Gm12678	Annotated_lncRNA	44943753	44948330	+	ENSMUST00000107824	ENSMUSG00000035649	Zcchc7	Zinc finger, CCHC-type||-	44756568	44932203	+	11549	downstream
ENSMUSG00000084854.1	Gm12678	Annotated_lncRNA	44943753	44948330	+	ENSMUST00000045078	ENSMUSG00000035637	Grhpr	-||D-isomer specific 2-hydroxyacid dehydrogenase, NAD-binding domain||D-isomer specific 2-hydroxyacid dehydrogenase, NAD-binding domain conserved site||D-isomer specific 2-hydroxyacid dehydrogenase, catalytic domain	44981395	44990734	+	33064	upstream
ENSMUSG00000084854.1	Gm12678	Annotated_lncRNA	44943753	44948330	+	ENSMUST00000128973	ENSMUSG00000035637	Grhpr	-||D-isomer specific 2-hydroxyacid dehydrogenase, NAD-binding domain||D-isomer specific 2-hydroxyacid dehydrogenase, NAD-binding domain conserved site||D-isomer specific 2-hydroxyacid dehydrogenase, catalytic domain	44981403	44983943	+	33072	upstream
ENSMUSG00000084854.1	Gm12678	Annotated_lncRNA	44943753	44948330	+	ENSMUST00000180217	ENSMUSG00000049657	Zbtb5	Zinc finger, C2H2||POZ domain||BTB/POZ domain||Zinc finger, C2H2-like	44991245	45012412	-	42914	downstream
ENSMUSG00000084854.1	Gm12678	Annotated_lncRNA	44943753	44948330	+	ENSMUST00000133157	ENSMUSG00000028318	Polr1e	RNA polymerase I associated factor, A49-like	45018583	45033692	+	70252	upstream
ENSMUSG00000084854.1	Gm12678	Annotated_lncRNA	44943753	44948330	+	ENSMUST00000052236	ENSMUSG00000048232	Fbxo10	Parallel beta-helix repeat-2||Carbohydrate-binding/sugar hydrolysis domain||Pectin lyase fold/virulence factor||Parallel beta-helix repeat||F-box domain	45034247	45084604	-	85916	downstream
ENSMUSG00000084854.1	Gm12678	Annotated_lncRNA	44943753	44948330	+	ENSMUST00000131991	ENSMUSG00000049657	Zbtb5	Zinc finger, C2H2||POZ domain||BTB/POZ domain||Zinc finger, C2H2-like	44994814	45012145	-	46483	downstream
ENSMUSG00000084854.1	Gm12678	Annotated_lncRNA	44943753	44948330	+	ENSMUST00000054723	ENSMUSG00000028318	Polr1e	RNA polymerase I associated factor, A49-like	45019235	45032112	+	70904	upstream
ENSMUSG00000084854.1	Gm12678	Annotated_lncRNA	44943753	44948330	+	ENSMUST00000029999	ENSMUSG00000028318	Polr1e	RNA polymerase I associated factor, A49-like	45018662	45032365	+	70331	upstream
ENSMUSG00000084854.1	Gm12678	Annotated_lncRNA	44943753	44948330	+	ENSMUST00000151148	ENSMUSG00000035637	Grhpr	-||D-isomer specific 2-hydroxyacid dehydrogenase, NAD-binding domain||D-isomer specific 2-hydroxyacid dehydrogenase, NAD-binding domain conserved site||D-isomer specific 2-hydroxyacid dehydrogenase, catalytic domain	44981432	44989010	+	33101	upstream
ENSMUSG00000084854.1	Gm12678	Annotated_lncRNA	44943753	44948330	+	ENSMUST00000140008	ENSMUSG00000048232	Fbxo10	Parallel beta-helix repeat-2||Carbohydrate-binding/sugar hydrolysis domain||Pectin lyase fold/virulence factor||Parallel beta-helix repeat||F-box domain	45034248	45062004	-	85917	downstream
ENSMUSG00000084854.1	Gm12678	Annotated_lncRNA	44943753	44948330	+	ENSMUST00000107817	ENSMUSG00000049657	Zbtb5	Zinc finger, C2H2||POZ domain||BTB/POZ domain||Zinc finger, C2H2-like	44992981	45012412	-	44650	downstream
ENSMUSG00000084854.1	Gm12678	Annotated_lncRNA	44943753	44948330	+	ENSMUST00000107814	ENSMUSG00000028318	Polr1e	RNA polymerase I associated factor, A49-like	45018663	45036565	+	70332	upstream
ENSMUSG00000084854.1	Gm12678	Annotated_lncRNA	44943753	44948330	+	ENSMUST00000055028	ENSMUSG00000049657	Zbtb5	Zinc finger, C2H2||POZ domain||BTB/POZ domain||Zinc finger, C2H2-like	44991242	45012394	-	42911	downstream
ENSMUSG00000084854.1	Gm12678	Annotated_lncRNA	44943753	44948330	+	ENSMUST00000147272	ENSMUSG00000035649	Zcchc7	Zinc finger, CCHC-type||-	44923118	44932215	+	11537	downstream
ENSMUSG00000098332.2	2310009A05Rik	Annotated_lncRNA	73039718	73042779	+	ENSMUST00000124565	ENSMUSG00000086158	Ccpg1os	-	72979722	72985376	-	54341	upstream
ENSMUSG00000098332.2	2310009A05Rik	Annotated_lncRNA	73039718	73042779	+	ENSMUST00000150826	ENSMUSG00000034563	Ccpg1	-	72985578	73013938	+	25779	downstream
ENSMUSG00000098332.2	2310009A05Rik	Annotated_lncRNA	73039718	73042779	+	ENSMUST00000034738	ENSMUSG00000032215	Rsl24d1	-||TRASH domain||Ribosomal protein L24e-related||Ribosomal protein L24e, conserved site	73113448	73123333	+	70668	upstream
ENSMUSG00000098332.2	2310009A05Rik	Annotated_lncRNA	73039718	73042779	+	ENSMUST00000034737	ENSMUSG00000092622	Khdc3	-	73102398	73104438	+	59618	upstream
ENSMUSG00000098332.2	2310009A05Rik	Annotated_lncRNA	73039718	73042779	+	ENSMUST00000034734	ENSMUSG00000092192	Dyx1c1	Tetratricopeptide repeat-containing domain||HSP20-like chaperone||Tetratricopeptide repeat 1||Tetratricopeptide repeat||CS domain	72958785	72973064	+	66653	downstream
ENSMUSG00000098332.2	2310009A05Rik	Annotated_lncRNA	73039718	73042779	+	ENSMUST00000184389	ENSMUSG00000079469	Pigb	-||GPI mannosyltransferase	73014664	73039651	-	66	upstream
ENSMUSG00000098332.2	2310009A05Rik	Annotated_lncRNA	73039718	73042779	+	ENSMUST00000167514	ENSMUSG00000092622	Khdc3	-	73102510	73104192	+	59730	upstream
ENSMUSG00000098332.2	2310009A05Rik	Annotated_lncRNA	73039718	73042779	+	ENSMUST00000093819	ENSMUSG00000079469	Pigb	-||GPI mannosyltransferase	73008481	73015657	-	24060	upstream
ENSMUSG00000098332.2	2310009A05Rik	Annotated_lncRNA	73039718	73042779	+	ENSMUST00000037977	ENSMUSG00000034563	Ccpg1	-	72985429	73016340	+	23377	downstream
ENSMUSG00000098332.2	2310009A05Rik	Annotated_lncRNA	73039718	73042779	+	ENSMUST00000140675	ENSMUSG00000034563	Ccpg1	-	72985605	73016338	+	23379	downstream
ENSMUSG00000098332.2	2310009A05Rik	Annotated_lncRNA	73039718	73042779	+	ENSMUST00000184035	ENSMUSG00000079469	Pigb	-||GPI mannosyltransferase	73013711	73039699	-	18	upstream
ENSMUSG00000098332.2	2310009A05Rik	Annotated_lncRNA	73039718	73042779	+	ENSMUST00000156879	ENSMUSG00000034563	Ccpg1	-	72985504	73001735	+	37982	downstream
ENSMUSG00000098332.2	2310009A05Rik	Annotated_lncRNA	73039718	73042779	+	ENSMUST00000098567	ENSMUSG00000092192	Dyx1c1	Tetratricopeptide repeat-containing domain||HSP20-like chaperone||Tetratricopeptide repeat 1||Tetratricopeptide repeat||CS domain	72958785	72973061	+	66656	downstream
ENSMUSG00000098332.2	2310009A05Rik	Annotated_lncRNA	73039718	73042779	+	ENSMUST00000098566	ENSMUSG00000079469	Pigb	-||GPI mannosyltransferase	73015696	73039699	-	18	upstream
ENSMUSG00000098332.2	2310009A05Rik	Annotated_lncRNA	73039718	73042779	+	ENSMUST00000038489	ENSMUSG00000034910	Pygo1	Zinc finger, PHD-type||Zinc finger, PHD-type, conserved site||Zinc finger, FYVE/PHD-type||Zinc finger, PHD-finger	72925645	72952181	+	87536	downstream
ENSMUSG00000098332.2	2310009A05Rik	Annotated_lncRNA	73039718	73042779	+	ENSMUST00000034722	ENSMUSG00000032202	Rab27a	Small GTP-binding protein domain||P-loop containing nucleoside triphosphate hydrolase||Ran GTPase||Small GTPase superfamily, Rho type||Small GTPase superfamily||Small GTPase superfamily, Rab type||Small GTPase superfamily, Ras type	73044857	73097592	+	2077	upstream
ENSMUSG00000098332.2	2310009A05Rik	Annotated_lncRNA	73039718	73042779	+	ENSMUST00000172578	ENSMUSG00000092622	Khdc3	-	73101836	73102887	+	59056	upstream
ENSMUSG00000098332.2	2310009A05Rik	Annotated_lncRNA	73039718	73042779	+	ENSMUST00000165177	ENSMUSG00000032215	Rsl24d1	-||TRASH domain||Ribosomal protein L24e-related||Ribosomal protein L24e, conserved site	73114596	73122382	+	71816	upstream
ENSMUSG00000098332.2	2310009A05Rik	Annotated_lncRNA	73039718	73042779	+	ENSMUST00000085350	ENSMUSG00000034563	Ccpg1	-	72985605	73016000	+	23717	downstream
ENSMUSG00000098332.2	2310009A05Rik	Annotated_lncRNA	73039718	73042779	+	ENSMUST00000173734	ENSMUSG00000092622	Khdc3	-	73102398	73104438	+	59618	upstream
ENSMUSG00000098332.2	2310009A05Rik	Annotated_lncRNA	73039718	73042779	+	ENSMUST00000169399	ENSMUSG00000032215	Rsl24d1	-||TRASH domain||Ribosomal protein L24e-related||Ribosomal protein L24e, conserved site	73113426	73122712	+	70646	upstream
ENSMUSG00000098332.2	2310009A05Rik	Annotated_lncRNA	73039718	73042779	+	ENSMUST00000184146	ENSMUSG00000032202	Rab27a	Small GTP-binding protein domain||P-loop containing nucleoside triphosphate hydrolase||Ran GTPase||Small GTPase superfamily, Rho type||Small GTPase superfamily||Small GTPase superfamily, Rab type||Small GTPase superfamily, Ras type	73044854	73097629	+	2074	upstream
ENSMUSG00000098332.2	2310009A05Rik	Annotated_lncRNA	73039718	73042779	+	ENSMUST00000174203	ENSMUSG00000092310	Gm20509	Ribosomal protein L24e-related	73102470	73117920	+	59690	upstream
ENSMUSG00000097468.1	2310010G23Rik	Annotated_lncRNA	36814771	36817185	-	ENSMUST00000202991	ENSMUSG00000016308	Ube2a	Ubiquitin-conjugating enzyme, active site||Ubiquitin-conjugating enzyme E2||Ubiquitin-conjugating enzyme/RWD-like	36874331	36883250	+	57145	upstream
ENSMUSG00000097468.1	2310010G23Rik	Annotated_lncRNA	36814771	36817185	-	ENSMUST00000115239	ENSMUSG00000050379	2019-09-06	Septin||P-loop containing nucleoside triphosphate hydrolase||Septin-type guanine nucleotide-binding (G) domain	36915031	36989656	-	97845	downstream
ENSMUSG00000097468.1	2310010G23Rik	Annotated_lncRNA	36814771	36817185	-	ENSMUST00000016463	ENSMUSG00000016319	Slc25a5	Mitochondrial substrate/solute carrier||Adenine nucleotide translocator 1||Mitochondrial carrier protein	36795651	36798807	+	15963	downstream
ENSMUSG00000097468.1	2310010G23Rik	Annotated_lncRNA	36814771	36817185	-	ENSMUST00000057093	ENSMUSG00000044149	Nkrf	G-patch domain||R3H domain	36887540	36902899	-	70354	downstream
ENSMUSG00000097468.1	2310010G23Rik	Annotated_lncRNA	36814771	36817185	-	ENSMUST00000201117	ENSMUSG00000016308	Ube2a	Ubiquitin-conjugating enzyme, active site||Ubiquitin-conjugating enzyme E2||Ubiquitin-conjugating enzyme/RWD-like	36874358	36883112	+	57172	upstream
ENSMUSG00000097468.1	2310010G23Rik	Annotated_lncRNA	36814771	36817185	-	ENSMUST00000115248	ENSMUSG00000006423	C330007P06Rik	-	36848543	36864246	-	31357	downstream
ENSMUSG00000097468.1	2310010G23Rik	Annotated_lncRNA	36814771	36817185	-	ENSMUST00000016452	ENSMUSG00000016308	Ube2a	Ubiquitin-conjugating enzyme, active site||Ubiquitin-conjugating enzyme E2||Ubiquitin-conjugating enzyme/RWD-like	36874295	36884222	+	57109	upstream
ENSMUSG00000097468.1	2310010G23Rik	Annotated_lncRNA	36814771	36817185	-	ENSMUST00000115249	ENSMUSG00000006423	C330007P06Rik	-	36823737	36864238	-	6551	downstream
ENSMUSG00000097468.1	2310010G23Rik	Annotated_lncRNA	36814771	36817185	-	ENSMUST00000201068	ENSMUSG00000016308	Ube2a	Ubiquitin-conjugating enzyme, active site||Ubiquitin-conjugating enzyme E2||Ubiquitin-conjugating enzyme/RWD-like	36874341	36883924	+	57155	upstream
ENSMUSG00000097468.1	2310010G23Rik	Annotated_lncRNA	36814771	36817185	-	ENSMUST00000047655	ENSMUSG00000037636	Slc25a43	Mitochondrial substrate/solute carrier||Mitochondrial carrier protein	36743659	36777202	+	37568	downstream
ENSMUSG00000097468.1	2310010G23Rik	Annotated_lncRNA	36814771	36817185	-	ENSMUST00000053456	ENSMUSG00000050379	2019-09-06	Septin||P-loop containing nucleoside triphosphate hydrolase||Septin-type guanine nucleotide-binding (G) domain	36913446	36989656	-	96260	downstream
ENSMUSG00000097468.1	2310010G23Rik	Annotated_lncRNA	36814771	36817185	-	ENSMUST00000047486	ENSMUSG00000006423	C330007P06Rik	-	36848550	36874111	-	31364	downstream
ENSMUSG00000097468.1	2310010G23Rik	Annotated_lncRNA	36814771	36817185	-	ENSMUST00000200835	ENSMUSG00000016308	Ube2a	Ubiquitin-conjugating enzyme, active site||Ubiquitin-conjugating enzyme E2||Ubiquitin-conjugating enzyme/RWD-like	36874346	36883541	+	57160	upstream
ENSMUSG00000097468.1	2310010G23Rik	Annotated_lncRNA	36814771	36817185	-	ENSMUST00000060474	ENSMUSG00000050379	2019-09-06	Septin||P-loop containing nucleoside triphosphate hydrolase||Septin-type guanine nucleotide-binding (G) domain	36911326	36989656	-	94140	downstream
ENSMUSG00000097468.1	2310010G23Rik	Annotated_lncRNA	36814771	36817185	-	ENSMUST00000202812	ENSMUSG00000016308	Ube2a	Ubiquitin-conjugating enzyme, active site||Ubiquitin-conjugating enzyme E2||Ubiquitin-conjugating enzyme/RWD-like	36874653	36883386	+	57467	upstream
XLOC_029938	--	Novel_lncRNA	49302136	49336396	-	ENSMUST00000076670	ENSMUSG00000063446	Lppr1	Phosphatidic acid phosphatase type 2/haloperoxidase	49059282	49340259	+	-34261	antisense
XLOC_029938	--	Novel_lncRNA	49302136	49336396	-	ENSMUST00000081541	ENSMUSG00000060317	Acnat2	BAAT/Acyl-CoA thioester hydrolase C-terminal||Acyl-CoA thioester hydrolase/bile acid-CoA amino acid N-acetyltransferase||Acyl-CoA thioesterase, long chain||Alpha/Beta hydrolase fold	49379840	49408151	-	43443	downstream
XLOC_029938	--	Novel_lncRNA	49302136	49336396	-	ENSMUST00000107698	ENSMUSG00000060317	Acnat2	BAAT/Acyl-CoA thioester hydrolase C-terminal||Acyl-CoA thioester hydrolase/bile acid-CoA amino acid N-acetyltransferase||Acyl-CoA thioesterase, long chain||Alpha/Beta hydrolase fold	49379920	49383576	-	43523	downstream
XLOC_029938	--	Novel_lncRNA	49302136	49336396	-	ENSMUST00000125123	ENSMUSG00000060317	Acnat2	BAAT/Acyl-CoA thioester hydrolase C-terminal||Acyl-CoA thioester hydrolase/bile acid-CoA amino acid N-acetyltransferase||Acyl-CoA thioesterase, long chain||Alpha/Beta hydrolase fold	49381778	49405758	-	45381	downstream
XLOC_030816	--	Novel_lncRNA	138961426	138965656	-	ENSMUST00000043042	ENSMUSG00000041143	Tmco4	Alpha/Beta hydrolase fold||Protein of unknown function DUF726||-	138972892	139059171	+	7235	upstream
XLOC_030816	--	Novel_lncRNA	138961426	138965656	-	ENSMUST00000105805	ENSMUSG00000078518	Gm13030	-	138870992	138873964	-	87461	upstream
XLOC_030816	--	Novel_lncRNA	138961426	138965656	-	ENSMUST00000102513	ENSMUSG00000041193	Pla2g5	Phospholipase A2, active site||Phospholipase A2 domain||Phospholipase A2	138799244	138863482	-	97943	upstream
XLOC_030816	--	Novel_lncRNA	138961426	138965656	-	ENSMUST00000105803	ENSMUSG00000028751	Pla2g2e	Phospholipase A2, active site||-||Phospholipase A2||Phospholipase A2 domain	138877971	138882522	+	78903	downstream
XLOC_030816	--	Novel_lncRNA	138961426	138965656	-	ENSMUST00000105802	ENSMUSG00000028747	Htr6	G protein-coupled receptor, rhodopsin-like||GPCR, rhodopsin-like, 7TM||5-Hydroxytryptamine 6 receptor	139061108	139075570	-	95451	downstream
XLOC_030816	--	Novel_lncRNA	138961426	138965656	-	ENSMUST00000030531	ENSMUSG00000028751	Pla2g2e	Phospholipase A2, active site||-||Phospholipase A2||Phospholipase A2 domain	138877942	138882817	+	78608	downstream
XLOC_030816	--	Novel_lncRNA	138961426	138965656	-	ENSMUST00000030524	ENSMUSG00000041193	Pla2g5	Phospholipase A2, active site||Phospholipase A2 domain||Phospholipase A2	138799249	138863469	-	97956	upstream
XLOC_030816	--	Novel_lncRNA	138961426	138965656	-	ENSMUST00000097830	ENSMUSG00000041161	Otud3	OTU domain	138895379	138913945	-	47480	upstream
XLOC_030816	--	Novel_lncRNA	138961426	138965656	-	ENSMUST00000116094	ENSMUSG00000070661	Rnf186	Zinc finger, RING-type, conserved site||Zinc finger, RING-type	138967112	138968360	+	1455	upstream
XLOC_030816	--	Novel_lncRNA	138961426	138965656	-	ENSMUST00000123636	ENSMUSG00000041143	Tmco4	Alpha/Beta hydrolase fold||Protein of unknown function DUF726||-	138972888	138990720	+	7231	upstream
XLOC_030816	--	Novel_lncRNA	138961426	138965656	-	ENSMUST00000105804	ENSMUSG00000028751	Pla2g2e	Phospholipase A2, active site||-||Phospholipase A2||Phospholipase A2 domain	138879360	138882817	+	78608	downstream
XLOC_030816	--	Novel_lncRNA	138961426	138965656	-	ENSMUST00000050949	ENSMUSG00000041143	Tmco4	Alpha/Beta hydrolase fold||Protein of unknown function DUF726||-	138972905	139059167	+	7248	upstream
XLOC_030816	--	Novel_lncRNA	138961426	138965656	-	ENSMUST00000068036	ENSMUSG00000028747	Htr6	G protein-coupled receptor, rhodopsin-like||GPCR, rhodopsin-like, 7TM||5-Hydroxytryptamine 6 receptor	139061409	139074789	-	95752	downstream
ENSMUSG00000097062.1	Gm17586	Annotated_lncRNA	120633768	120635125	+	ENSMUST00000167678	ENSMUSG00000025142	Aspscr1	Ubiquitin-related domain||TUG ubiquitin-like domain||UBX domain||-	120689310	120709241	+	54184	upstream
ENSMUSG00000097062.1	Gm17586	Annotated_lncRNA	120633768	120635125	+	ENSMUST00000106154	ENSMUSG00000025144	Stra13	-||Centromere protein X	120710942	120713732	-	75816	downstream
ENSMUSG00000097062.1	Gm17586	Annotated_lncRNA	120633768	120635125	+	ENSMUST00000142229	ENSMUSG00000018012	Rac3	P-loop containing nucleoside triphosphate hydrolase||Small GTP-binding protein domain||Small GTPase superfamily, Rho type||Small GTPase superfamily||Small GTPase superfamily, Ras type||Small GTPase superfamily, Rab type	120721573	120723606	+	86447	upstream
ENSMUSG00000097062.1	Gm17586	Annotated_lncRNA	120633768	120635125	+	ENSMUST00000106177	ENSMUSG00000042988	Notum	Pectinacetylesterase/NOTUM	120653788	120660606	-	18662	downstream
ENSMUSG00000097062.1	Gm17586	Annotated_lncRNA	120633768	120635125	+	ENSMUST00000106155	ENSMUSG00000025144	Stra13	-||Centromere protein X	120710942	120713732	-	75816	downstream
ENSMUSG00000097062.1	Gm17586	Annotated_lncRNA	120633768	120635125	+	ENSMUST00000026119	ENSMUSG00000025127	Gcgr	GPCR, family 2, secretin-like, conserved site||GPCR, family 2-like||GPCR, family 2, secretin-like||GPCR, family 2, glucagon receptor||GPCR, family 2, extracellular hormone receptor domain||GPCR, family 2, glucagon-like peptide-1/glucagon receptor	120530699	120538984	+	94783	downstream
ENSMUSG00000097062.1	Gm17586	Annotated_lncRNA	120633768	120635125	+	ENSMUST00000106178	ENSMUSG00000042988	Notum	Pectinacetylesterase/NOTUM	120653788	120660829	-	18662	downstream
ENSMUSG00000097062.1	Gm17586	Annotated_lncRNA	120633768	120635125	+	ENSMUST00000129644	ENSMUSG00000025142	Aspscr1	Ubiquitin-related domain||TUG ubiquitin-like domain||UBX domain||-	120677226	120678445	+	42100	upstream
ENSMUSG00000097062.1	Gm17586	Annotated_lncRNA	120633768	120635125	+	ENSMUST00000106158	ENSMUSG00000025142	Aspscr1	Ubiquitin-related domain||TUG ubiquitin-like domain||UBX domain||-	120673056	120709444	+	37930	upstream
ENSMUSG00000097062.1	Gm17586	Annotated_lncRNA	120633768	120635125	+	ENSMUST00000034913	ENSMUSG00000061111	Fam195b	FAM195	120542888	120549727	-	84040	upstream
ENSMUSG00000097062.1	Gm17586	Annotated_lncRNA	120633768	120635125	+	ENSMUST00000026125	ENSMUSG00000025134	Alyref	Friend of PRMT1 duplication||RNA recognition motif domain	120592121	120598365	-	35402	upstream
ENSMUSG00000097062.1	Gm17586	Annotated_lncRNA	120633768	120635125	+	ENSMUST00000026148	ENSMUSG00000025150	Cbr2	Short-chain dehydrogenase/reductase, conserved site||Glucose/ribitol dehydrogenase||Short-chain dehydrogenase/reductase SDR	120729489	120732114	-	94363	downstream
ENSMUSG00000097062.1	Gm17586	Annotated_lncRNA	120633768	120635125	+	ENSMUST00000151160	ENSMUSG00000025142	Aspscr1	Ubiquitin-related domain||TUG ubiquitin-like domain||UBX domain||-	120677339	120689297	+	42213	upstream
ENSMUSG00000097062.1	Gm17586	Annotated_lncRNA	120633768	120635125	+	ENSMUST00000168360	ENSMUSG00000025130	P4hb	Disulphide isomerase||Thioredoxin domain||Protein disulphide isomerase||Thioredoxin, conserved site||Thioredoxin-like fold	120560945	120572841	-	60926	upstream
ENSMUSG00000097062.1	Gm17586	Annotated_lncRNA	120633768	120635125	+	ENSMUST00000151852	ENSMUSG00000025145	Lrrc45	Leucine-rich repeat, ribonuclease inhibitor subtype	120713978	120715554	+	78852	upstream
ENSMUSG00000097062.1	Gm17586	Annotated_lncRNA	120633768	120635125	+	ENSMUST00000026128	ENSMUSG00000025135	Anapc11	Anaphase-promoting complex subunit 11||Zinc finger, RING-type	120598421	120608198	+	25569	downstream
ENSMUSG00000097062.1	Gm17586	Annotated_lncRNA	120633768	120635125	+	ENSMUST00000026129	ENSMUSG00000025137	Pcyt2	Cytidyltransferase-like domain	120610087	120617936	-	15831	upstream
ENSMUSG00000097062.1	Gm17586	Annotated_lncRNA	120633768	120635125	+	ENSMUST00000168714	ENSMUSG00000025142	Aspscr1	Ubiquitin-related domain||TUG ubiquitin-like domain||UBX domain||-	120673083	120709072	+	37957	upstream
ENSMUSG00000097062.1	Gm17586	Annotated_lncRNA	120633768	120635125	+	ENSMUST00000061309	ENSMUSG00000044034	Npb	Neuropeptide B/W precursor family||Neuropeptide B precursor	120608505	120609033	+	24734	downstream
ENSMUSG00000097062.1	Gm17586	Annotated_lncRNA	120633768	120635125	+	ENSMUST00000106188	ENSMUSG00000025137	Pcyt2	Cytidyltransferase-like domain	120610417	120617925	-	15842	upstream
ENSMUSG00000097062.1	Gm17586	Annotated_lncRNA	120633768	120635125	+	ENSMUST00000026121	ENSMUSG00000025129	Ppp1r27	Ankyrin repeat-containing domain||Ankyrin repeat	120549979	120551132	-	82635	upstream
ENSMUSG00000097062.1	Gm17586	Annotated_lncRNA	120633768	120635125	+	ENSMUST00000026122	ENSMUSG00000025130	P4hb	Disulphide isomerase||Thioredoxin domain||Protein disulphide isomerase||Thioredoxin, conserved site||Thioredoxin-like fold	120560298	120573253	-	60514	upstream
ENSMUSG00000097062.1	Gm17586	Annotated_lncRNA	120633768	120635125	+	ENSMUST00000058162	ENSMUSG00000051510	Mafg	Transcription factor, Skn-1-like, DNA-binding domain||Basic-leucine zipper domain||Basic leucine zipper domain, Maf-type	120625117	120633600	-	167	upstream
ENSMUSG00000097062.1	Gm17586	Annotated_lncRNA	120633768	120635125	+	ENSMUST00000106183	ENSMUSG00000025138	Sirt7	Sirtuin family||DHS-like NAD/FAD-binding domain||Sirtuin family, catalytic core domain	120623990	120624984	-	8783	upstream
ENSMUSG00000097062.1	Gm17586	Annotated_lncRNA	120633768	120635125	+	ENSMUST00000106182	ENSMUSG00000051510	Mafg	Transcription factor, Skn-1-like, DNA-binding domain||Basic-leucine zipper domain||Basic leucine zipper domain, Maf-type	120629007	120630797	-	2970	upstream
ENSMUSG00000097062.1	Gm17586	Annotated_lncRNA	120633768	120635125	+	ENSMUST00000106181	ENSMUSG00000051510	Mafg	Transcription factor, Skn-1-like, DNA-binding domain||Basic-leucine zipper domain||Basic leucine zipper domain, Maf-type	120629141	120630636	-	3131	upstream
ENSMUSG00000097062.1	Gm17586	Annotated_lncRNA	120633768	120635125	+	ENSMUST00000106180	ENSMUSG00000051510	Mafg	Transcription factor, Skn-1-like, DNA-binding domain||Basic-leucine zipper domain||Basic leucine zipper domain, Maf-type	120629232	120630148	-	3619	upstream
ENSMUSG00000097062.1	Gm17586	Annotated_lncRNA	120633768	120635125	+	ENSMUST00000151876	ENSMUSG00000025140	Pycr1	Pyrroline-5-carboxylate reductase, dimerisation domain||Pyrroline-5-carboxylate reductase, catalytic, N-terminal||6-phosphogluconate dehydrogenase C-terminal domain-like||Pyrroline-5-carboxylate reductase	120641478	120643704	-	6352	downstream
ENSMUSG00000097062.1	Gm17586	Annotated_lncRNA	120633768	120635125	+	ENSMUST00000080202	ENSMUSG00000025138	Sirt7	Sirtuin family||DHS-like NAD/FAD-binding domain||Sirtuin family, catalytic core domain	120618372	120625014	-	8753	upstream
ENSMUSG00000097062.1	Gm17586	Annotated_lncRNA	120633768	120635125	+	ENSMUST00000154565	ENSMUSG00000025150	Cbr2	Short-chain dehydrogenase/reductase, conserved site||Glucose/ribitol dehydrogenase||Short-chain dehydrogenase/reductase SDR	120729779	120731944	-	94653	downstream
ENSMUSG00000097062.1	Gm17586	Annotated_lncRNA	120633768	120635125	+	ENSMUST00000106159	ENSMUSG00000025142	Aspscr1	Ubiquitin-related domain||TUG ubiquitin-like domain||UBX domain||-	120676661	120709444	+	41535	upstream
ENSMUSG00000097062.1	Gm17586	Annotated_lncRNA	120633768	120635125	+	ENSMUST00000106160	ENSMUSG00000025142	Aspscr1	Ubiquitin-related domain||TUG ubiquitin-like domain||UBX domain||-	120676661	120709442	+	41535	upstream
ENSMUSG00000097062.1	Gm17586	Annotated_lncRNA	120633768	120635125	+	ENSMUST00000106148	ENSMUSG00000039450	Dcxr	Short-chain dehydrogenase/reductase, conserved site||Glucose/ribitol dehydrogenase||Short-chain dehydrogenase/reductase SDR	120725399	120727243	-	90273	downstream
ENSMUSG00000097062.1	Gm17586	Annotated_lncRNA	120633768	120635125	+	ENSMUST00000018156	ENSMUSG00000018012	Rac3	P-loop containing nucleoside triphosphate hydrolase||Small GTP-binding protein domain||Small GTPase superfamily, Rho type||Small GTPase superfamily||Small GTPase superfamily, Ras type||Small GTPase superfamily, Rab type	120721470	120723969	+	86344	upstream
ENSMUSG00000097062.1	Gm17586	Annotated_lncRNA	120633768	120635125	+	ENSMUST00000093140	ENSMUSG00000025135	Anapc11	Anaphase-promoting complex subunit 11||Zinc finger, RING-type	120598532	120605776	+	27991	downstream
ENSMUSG00000097062.1	Gm17586	Annotated_lncRNA	120633768	120635125	+	ENSMUST00000139706	ENSMUSG00000025140	Pycr1	Pyrroline-5-carboxylate reductase, dimerisation domain||Pyrroline-5-carboxylate reductase, catalytic, N-terminal||6-phosphogluconate dehydrogenase C-terminal domain-like||Pyrroline-5-carboxylate reductase	120641714	120643769	-	6588	downstream
ENSMUSG00000097062.1	Gm17586	Annotated_lncRNA	120633768	120635125	+	ENSMUST00000135346	ENSMUSG00000025142	Aspscr1	Ubiquitin-related domain||TUG ubiquitin-like domain||UBX domain||-	120673359	120689171	+	38233	upstream
ENSMUSG00000097062.1	Gm17586	Annotated_lncRNA	120633768	120635125	+	ENSMUST00000153346	ENSMUSG00000025142	Aspscr1	Ubiquitin-related domain||TUG ubiquitin-like domain||UBX domain||-	120673404	120686701	+	38278	upstream
ENSMUSG00000097062.1	Gm17586	Annotated_lncRNA	120633768	120635125	+	ENSMUST00000168510	ENSMUSG00000025142	Aspscr1	Ubiquitin-related domain||TUG ubiquitin-like domain||UBX domain||-	120686693	120709443	+	51567	upstream
ENSMUSG00000097062.1	Gm17586	Annotated_lncRNA	120633768	120635125	+	ENSMUST00000150458	ENSMUSG00000042988	Notum	Pectinacetylesterase/NOTUM	120657563	120661175	-	22437	downstream
ENSMUSG00000097062.1	Gm17586	Annotated_lncRNA	120633768	120635125	+	ENSMUST00000055424	ENSMUSG00000025144	Stra13	-||Centromere protein X	120710942	120713738	-	75816	downstream
ENSMUSG00000097062.1	Gm17586	Annotated_lncRNA	120633768	120635125	+	ENSMUST00000127269	ENSMUSG00000025142	Aspscr1	Ubiquitin-related domain||TUG ubiquitin-like domain||UBX domain||-	120673374	120678453	+	38248	upstream
ENSMUSG00000097062.1	Gm17586	Annotated_lncRNA	120633768	120635125	+	ENSMUST00000131727	ENSMUSG00000025142	Aspscr1	Ubiquitin-related domain||TUG ubiquitin-like domain||UBX domain||-	120673374	120689167	+	38248	upstream
ENSMUSG00000097062.1	Gm17586	Annotated_lncRNA	120633768	120635125	+	ENSMUST00000149389	ENSMUSG00000025142	Aspscr1	Ubiquitin-related domain||TUG ubiquitin-like domain||UBX domain||-	120673392	120689127	+	38266	upstream
ENSMUSG00000097062.1	Gm17586	Annotated_lncRNA	120633768	120635125	+	ENSMUST00000026144	ENSMUSG00000039450	Dcxr	Short-chain dehydrogenase/reductase, conserved site||Glucose/ribitol dehydrogenase||Short-chain dehydrogenase/reductase SDR	120725399	120727281	-	90273	downstream
ENSMUSG00000097062.1	Gm17586	Annotated_lncRNA	120633768	120635125	+	ENSMUST00000026133	ENSMUSG00000025140	Pycr1	Pyrroline-5-carboxylate reductase, dimerisation domain||Pyrroline-5-carboxylate reductase, catalytic, N-terminal||6-phosphogluconate dehydrogenase C-terminal domain-like||Pyrroline-5-carboxylate reductase	120639416	120643748	-	4290	downstream
ENSMUSG00000097062.1	Gm17586	Annotated_lncRNA	120633768	120635125	+	ENSMUST00000067936	ENSMUSG00000025132	Arhgdia	Immunoglobulin E-set||Rho protein GDP-dissociation inhibitor	120578109	120581380	-	52387	upstream
ENSMUSG00000097062.1	Gm17586	Annotated_lncRNA	120633768	120635125	+	ENSMUST00000026137	ENSMUSG00000025144	Stra13	-||Centromere protein X	120710943	120713738	-	75817	downstream
ENSMUSG00000097062.1	Gm17586	Annotated_lncRNA	120633768	120635125	+	ENSMUST00000026139	ENSMUSG00000025145	Lrrc45	Leucine-rich repeat, ribonuclease inhibitor subtype	120713925	120721128	+	78799	upstream
ENSMUSG00000097062.1	Gm17586	Annotated_lncRNA	120633768	120635125	+	ENSMUST00000026135	ENSMUSG00000025142	Aspscr1	Ubiquitin-related domain||TUG ubiquitin-like domain||UBX domain||-	120672992	120709447	+	37866	upstream
ENSMUSG00000097062.1	Gm17586	Annotated_lncRNA	120633768	120635125	+	ENSMUST00000026134	ENSMUSG00000025141	Myadml2	Marvel domain	120646031	120648158	-	10905	downstream
ENSMUSG00000097062.1	Gm17586	Annotated_lncRNA	120633768	120635125	+	ENSMUST00000106194	ENSMUSG00000044034	Npb	Neuropeptide B/W precursor family||Neuropeptide B precursor	120608477	120609093	+	24674	downstream
ENSMUSG00000097062.1	Gm17586	Annotated_lncRNA	120633768	120635125	+	ENSMUST00000106195	ENSMUSG00000044034	Npb	Neuropeptide B/W precursor family||Neuropeptide B precursor	120608477	120609093	+	24674	downstream
ENSMUSG00000097062.1	Gm17586	Annotated_lncRNA	120633768	120635125	+	ENSMUST00000106197	ENSMUSG00000025132	Arhgdia	Immunoglobulin E-set||Rho protein GDP-dissociation inhibitor	120578104	120581624	-	52143	upstream
ENSMUSG00000097062.1	Gm17586	Annotated_lncRNA	120633768	120635125	+	ENSMUST00000146809	ENSMUSG00000025138	Sirt7	Sirtuin family||DHS-like NAD/FAD-binding domain||Sirtuin family, catalytic core domain	120618420	120620977	-	12790	upstream
ENSMUSG00000097062.1	Gm17586	Annotated_lncRNA	120633768	120635125	+	ENSMUST00000141254	ENSMUSG00000025140	Pycr1	Pyrroline-5-carboxylate reductase, dimerisation domain||Pyrroline-5-carboxylate reductase, catalytic, N-terminal||6-phosphogluconate dehydrogenase C-terminal domain-like||Pyrroline-5-carboxylate reductase	120641224	120643643	-	6098	downstream
ENSMUSG00000097062.1	Gm17586	Annotated_lncRNA	120633768	120635125	+	ENSMUST00000170556	ENSMUSG00000025140	Pycr1	Pyrroline-5-carboxylate reductase, dimerisation domain||Pyrroline-5-carboxylate reductase, catalytic, N-terminal||6-phosphogluconate dehydrogenase C-terminal domain-like||Pyrroline-5-carboxylate reductase	120635712	120643670	-	586	downstream
ENSMUSG00000097062.1	Gm17586	Annotated_lncRNA	120633768	120635125	+	ENSMUST00000103016	ENSMUSG00000025142	Aspscr1	Ubiquitin-related domain||TUG ubiquitin-like domain||UBX domain||-	120673064	120709444	+	37938	upstream
XLOC_019625	--	Novel_lncRNA	80534379	80536396	+	ENSMUST00000078049	ENSMUSG00000033016	Nfatc1	Nuclear factor of activated T cells (NFAT)||IPT domain||Immunoglobulin E-set||p53-like transcription factor, DNA-binding||Rel homology domain (RHD), DNA-binding domain	80606205	80713071	-	69808	downstream
XLOC_019625	--	Novel_lncRNA	80534379	80536396	+	ENSMUST00000161003	ENSMUSG00000033323	Ctdp1	HAD-like domain||FCP1-like phosphatase, phosphatase domain||FCP1-like phosphatase, C-terminal||FCP1 homology domain||Single hybrid motif||BRCT domain	80407965	80440859	-	93519	upstream
XLOC_019625	--	Novel_lncRNA	80534379	80536396	+	ENSMUST00000170905	ENSMUSG00000033016	Nfatc1	Nuclear factor of activated T cells (NFAT)||IPT domain||Immunoglobulin E-set||p53-like transcription factor, DNA-binding||Rel homology domain (RHD), DNA-binding domain	80606205	80713071	-	69808	downstream
XLOC_019625	--	Novel_lncRNA	80534379	80536396	+	ENSMUST00000167977	ENSMUSG00000033016	Nfatc1	Nuclear factor of activated T cells (NFAT)||IPT domain||Immunoglobulin E-set||p53-like transcription factor, DNA-binding||Rel homology domain (RHD), DNA-binding domain	80606205	80708173	-	69808	downstream
XLOC_019625	--	Novel_lncRNA	80534379	80536396	+	ENSMUST00000036229	ENSMUSG00000033323	Ctdp1	HAD-like domain||FCP1-like phosphatase, phosphatase domain||FCP1-like phosphatase, C-terminal||FCP1 homology domain||Single hybrid motif||BRCT domain	80407959	80469695	-	64683	upstream
XLOC_019507	--	Novel_lncRNA	62040939	62146875	+	ENSMUST00000067743	ENSMUSG00000054589	Gm9949	-	62180126	62184405	+	33250	upstream
XLOC_019507	--	Novel_lncRNA	62040939	62146875	+	ENSMUST00000051720	ENSMUSG00000045629	Sh3tc2	Variant SH3 domain||Tetratricopeptide repeat||Tetratricopeptide repeat 1||SH3 domain	61953075	62015715	+	25223	downstream
XLOC_019507	--	Novel_lncRNA	62040939	62146875	+	ENSMUST00000053640	ENSMUSG00000045730	Adrb2	GPCR, rhodopsin-like, 7TM||G protein-coupled receptor, rhodopsin-like||Beta 2 adrenoceptor||Adrenoceptor family	62177817	62179959	-	30941	downstream
XLOC_019169	--	Novel_lncRNA	11015421	11019025	+	ENSMUST00000047762	ENSMUSG00000005836	Gata6	GATA-type transcription activator, N-terminal||Zinc finger, GATA-type	11052510	11085635	+	33484	upstream
XLOC_012272	--	Novel_lncRNA	19708049	19714433	+	ENSMUST00000022340	ENSMUSG00000021806	Nid2	EGF-type aspartate/asparagine hydroxylation site||EGF-like calcium-binding domain||EGF-like domain||EGF-like calcium-binding, conserved site||Thyroglobulin type-1||G2 nidogen/fibulin G2F||Green fluorescent protein||NIDO domain||EGF-like, conserved site||LDLR class B repeat||Insulin-like growth factor binding protein, N-terminal	19751257	19811787	+	36823	upstream
XLOC_012272	--	Novel_lncRNA	19708049	19714433	+	ENSMUST00000022341	ENSMUSG00000021807	2700060E02Rik	Protein of unknown function UPF0568	19811402	19823823	-	96968	downstream
XLOC_013164	--	Novel_lncRNA	123151675	123235908	+	ENSMUST00000000201	ENSMUSG00000000197	Nalcn	Ion transport domain	123276641	123627144	-	40732	downstream
XLOC_038701	--	Novel_lncRNA	123031325	123068295	+	ENSMUST00000205495	ENSMUSG00000030779	Rbbp6	Zinc finger, RING-type||-||Zinc finger, CCHC-type||DWNN domain	123000279	123002554	+	28770	downstream
XLOC_038701	--	Novel_lncRNA	123031325	123068295	+	ENSMUST00000205514	ENSMUSG00000052707	Tnrc6a	Argonaute hook domain||-	123124177	123193987	+	55881	upstream
XLOC_038701	--	Novel_lncRNA	123031325	123068295	+	ENSMUST00000094053	ENSMUSG00000052707	Tnrc6a	Argonaute hook domain||-	123124181	123195296	+	55885	upstream
XLOC_038701	--	Novel_lncRNA	123031325	123068295	+	ENSMUST00000148880	ENSMUSG00000030779	Rbbp6	Zinc finger, RING-type||-||Zinc finger, CCHC-type||DWNN domain	122965686	122976008	+	55316	downstream
XLOC_038701	--	Novel_lncRNA	123031325	123068295	+	ENSMUST00000052135	ENSMUSG00000030779	Rbbp6	Zinc finger, RING-type||-||Zinc finger, CCHC-type||DWNN domain	122970564	123002557	+	28767	downstream
XLOC_038701	--	Novel_lncRNA	123031325	123068295	+	ENSMUST00000098062	ENSMUSG00000030779	Rbbp6	Zinc finger, RING-type||-||Zinc finger, CCHC-type||DWNN domain	122970700	122984392	+	46932	downstream
XLOC_038701	--	Novel_lncRNA	123031325	123068295	+	ENSMUST00000071590	ENSMUSG00000030779	Rbbp6	Zinc finger, RING-type||-||Zinc finger, CCHC-type||DWNN domain	122970918	123002557	+	28767	downstream
ENSMUSG00000085148.1	Mir22hg	Annotated_lncRNA	75461539	75466676	+	ENSMUST00000131283	ENSMUSG00000020850	Prpf8	PRO8NT domain||Pre-mRNA-processing-splicing factor 8, U5-snRNA-binding||JAB1/MPN/MOV34 metalloenzyme domain||PROCN domain||PROCT domain||RNA recognition motif, spliceosomal PrP8||PRP8 domain IV core||Pre-mRNA-processing-splicing factor 8, U6-snRNA-binding||Ribonuclease H-like domain	75486855	75495820	+	20178	upstream
ENSMUSG00000085148.1	Mir22hg	Annotated_lncRNA	75461539	75466676	+	ENSMUST00000042808	ENSMUSG00000038188	Scarf1	EGF-like, conserved site||Laminin EGF domain||-||EGF-like domain||Insulin-like growth factor binding protein, N-terminal	75513540	75526582	+	46863	upstream
ENSMUSG00000085148.1	Mir22hg	Annotated_lncRNA	75461539	75466676	+	ENSMUST00000102510	ENSMUSG00000020850	Prpf8	PRO8NT domain||Pre-mRNA-processing-splicing factor 8, U5-snRNA-binding||JAB1/MPN/MOV34 metalloenzyme domain||PROCN domain||PROCT domain||RNA recognition motif, spliceosomal PrP8||PRP8 domain IV core||Pre-mRNA-processing-splicing factor 8, U6-snRNA-binding||Ribonuclease H-like domain	75486820	75509449	+	20143	upstream
ENSMUSG00000085148.1	Mir22hg	Annotated_lncRNA	75461539	75466676	+	ENSMUST00000043598	ENSMUSG00000038217	Tlcd2	TRAM/LAG1/CLN8 homology domain	75468079	75470657	+	1402	upstream
ENSMUSG00000085148.1	Mir22hg	Annotated_lncRNA	75461539	75466676	+	ENSMUST00000138661	ENSMUSG00000000753	Serpinf1	-||Serpin, conserved site||Serpin domain	75413914	75422586	-	38952	upstream
ENSMUSG00000085148.1	Mir22hg	Annotated_lncRNA	75461539	75466676	+	ENSMUST00000137103	ENSMUSG00000000753	Serpinf1	-||Serpin, conserved site||Serpin domain	75414921	75422555	-	38983	upstream
ENSMUSG00000085148.1	Mir22hg	Annotated_lncRNA	75461539	75466676	+	ENSMUST00000043696	ENSMUSG00000038224	Serpinf2	-||Serpin domain||Serpin, conserved site	75431736	75439501	-	22037	upstream
ENSMUSG00000085148.1	Mir22hg	Annotated_lncRNA	75461539	75466676	+	ENSMUST00000132442	ENSMUSG00000045374	Wdr81	WD40-repeat-containing domain||BEACH domain||Protein kinase-like domain||WD40 repeat	75440950	75451083	-	10455	upstream
ENSMUSG00000085148.1	Mir22hg	Annotated_lncRNA	75461539	75466676	+	ENSMUST00000042561	ENSMUSG00000038178	Slc43a2	-||Major facilitator superfamily||Major facilitator superfamily domain	75531698	75577575	+	65021	upstream
ENSMUSG00000085148.1	Mir22hg	Annotated_lncRNA	75461539	75466676	+	ENSMUST00000143035	ENSMUSG00000038178	Slc43a2	-||Major facilitator superfamily||Major facilitator superfamily domain	75531743	75545777	+	65066	upstream
ENSMUSG00000085148.1	Mir22hg	Annotated_lncRNA	75461539	75466676	+	ENSMUST00000108435	ENSMUSG00000038217	Tlcd2	TRAM/LAG1/CLN8 homology domain	75468079	75470899	+	1402	upstream
ENSMUSG00000085148.1	Mir22hg	Annotated_lncRNA	75461539	75466676	+	ENSMUST00000108437	ENSMUSG00000038224	Serpinf2	-||Serpin domain||Serpin, conserved site	75431732	75438900	-	22638	upstream
ENSMUSG00000085148.1	Mir22hg	Annotated_lncRNA	75461539	75466676	+	ENSMUST00000108433	ENSMUSG00000038178	Slc43a2	-||Major facilitator superfamily||Major facilitator superfamily domain	75531698	75573883	+	65021	upstream
ENSMUSG00000085148.1	Mir22hg	Annotated_lncRNA	75461539	75466676	+	ENSMUST00000169547	ENSMUSG00000038178	Slc43a2	-||Major facilitator superfamily||Major facilitator superfamily domain	75532112	75577570	+	65435	upstream
ENSMUSG00000085148.1	Mir22hg	Annotated_lncRNA	75461539	75466676	+	ENSMUST00000018449	ENSMUSG00000020850	Prpf8	PRO8NT domain||Pre-mRNA-processing-splicing factor 8, U5-snRNA-binding||JAB1/MPN/MOV34 metalloenzyme domain||PROCN domain||PROCT domain||RNA recognition motif, spliceosomal PrP8||PRP8 domain IV core||Pre-mRNA-processing-splicing factor 8, U6-snRNA-binding||Ribonuclease H-like domain	75486816	75509447	+	20139	upstream
ENSMUSG00000085148.1	Mir22hg	Annotated_lncRNA	75461539	75466676	+	ENSMUST00000118243	ENSMUSG00000038188	Scarf1	EGF-like, conserved site||Laminin EGF domain||-||EGF-like domain||Insulin-like growth factor binding protein, N-terminal	75513541	75526582	+	46864	upstream
ENSMUSG00000085148.1	Mir22hg	Annotated_lncRNA	75461539	75466676	+	ENSMUST00000125982	ENSMUSG00000000753	Serpinf1	-||Serpin, conserved site||Serpin domain	75415470	75422552	-	38986	upstream
ENSMUSG00000085148.1	Mir22hg	Annotated_lncRNA	75461539	75466676	+	ENSMUST00000042972	ENSMUSG00000038195	Rilp	JNK/Rab-associated protein-1, N-terminal||Rab interacting lysosomal protein	75510094	75513168	+	43417	upstream
ENSMUSG00000085148.1	Mir22hg	Annotated_lncRNA	75461539	75466676	+	ENSMUST00000127226	ENSMUSG00000038178	Slc43a2	-||Major facilitator superfamily||Major facilitator superfamily domain	75532138	75545830	+	65461	upstream
ENSMUSG00000085148.1	Mir22hg	Annotated_lncRNA	75461539	75466676	+	ENSMUST00000000769	ENSMUSG00000000753	Serpinf1	-||Serpin, conserved site||Serpin domain	75409769	75422701	-	38837	upstream
ENSMUSG00000085148.1	Mir22hg	Annotated_lncRNA	75461539	75466676	+	ENSMUST00000128330	ENSMUSG00000038224	Serpinf2	-||Serpin domain||Serpin, conserved site	75435914	75439591	-	21947	upstream
ENSMUSG00000085148.1	Mir22hg	Annotated_lncRNA	75461539	75466676	+	ENSMUST00000155009	ENSMUSG00000000753	Serpinf1	-||Serpin, conserved site||Serpin domain	75416316	75418297	-	43241	upstream
ENSMUSG00000085148.1	Mir22hg	Annotated_lncRNA	75461539	75466676	+	ENSMUST00000149727	ENSMUSG00000038178	Slc43a2	-||Major facilitator superfamily||Major facilitator superfamily domain	75531694	75543323	+	65017	upstream
ENSMUSG00000085148.1	Mir22hg	Annotated_lncRNA	75461539	75466676	+	ENSMUST00000044530	ENSMUSG00000018809	Smyd4	SET domain||Zinc finger, MYND-type	75348433	75405705	+	55833	downstream
ENSMUSG00000085148.1	Mir22hg	Annotated_lncRNA	75461539	75466676	+	ENSMUST00000117392	ENSMUSG00000045374	Wdr81	WD40-repeat-containing domain||BEACH domain||Protein kinase-like domain||WD40 repeat	75440948	75454438	-	7100	upstream
ENSMUSG00000085148.1	Mir22hg	Annotated_lncRNA	75461539	75466676	+	ENSMUST00000173320	ENSMUSG00000045374	Wdr81	WD40-repeat-containing domain||BEACH domain||Protein kinase-like domain||WD40 repeat	75440944	75454717	-	6821	upstream
ENSMUSG00000087259.7	2610035D17Rik	Annotated_lncRNA	113043895	113173077	-	ENSMUST00000071539	ENSMUSG00000041654	Slc39a11	Zinc/iron permease||-	113244853	113565756	-	71775	downstream
ENSMUSG00000087259.7	2610035D17Rik	Annotated_lncRNA	113043895	113173077	-	ENSMUST00000106633	ENSMUSG00000041654	Slc39a11	Zinc/iron permease||-	113244853	113565759	-	71775	downstream
ENSMUSG00000087259.7	2610035D17Rik	Annotated_lncRNA	113043895	113173077	-	ENSMUST00000042657	ENSMUSG00000041654	Slc39a11	Zinc/iron permease||-	113244853	113565768	-	71775	downstream
ENSMUSG00000085582.7	3110099E03Rik	Annotated_lncRNA	115493513	115512201	-	ENSMUST00000110918	ENSMUSG00000040282	BC052040	Protein of unknown function with TPD sequence-motif	115581733	115778768	+	69531	upstream
ENSMUSG00000085582.7	3110099E03Rik	Annotated_lncRNA	115493513	115512201	-	ENSMUST00000166472	ENSMUSG00000040282	BC052040	Protein of unknown function with TPD sequence-motif	115581716	115778768	+	69514	upstream
ENSMUSG00000103143.1	Gm37742	Annotated_lncRNA	13036126	13040104	+	ENSMUST00000154269	ENSMUSG00000026730	Pter	Phosphotriesterase||Aryldialkylphosphatase, zinc-binding site	12924041	13000980	+	35145	downstream
ENSMUSG00000103143.1	Gm37742	Annotated_lncRNA	13036126	13040104	+	ENSMUST00000061545	ENSMUSG00000049630	C1ql3	Tumour necrosis factor-like domain||Collagen triple helix repeat||C1q domain	13003457	13011806	-	24319	upstream
ENSMUSG00000103143.1	Gm37742	Annotated_lncRNA	13036126	13040104	+	ENSMUST00000134794	ENSMUSG00000026730	Pter	Phosphotriesterase||Aryldialkylphosphatase, zinc-binding site	12924092	13003455	+	32670	downstream
ENSMUSG00000103143.1	Gm37742	Annotated_lncRNA	13036126	13040104	+	ENSMUST00000114796	ENSMUSG00000026730	Pter	Phosphotriesterase||Aryldialkylphosphatase, zinc-binding site	12924069	13000981	+	35144	downstream
ENSMUSG00000103143.1	Gm37742	Annotated_lncRNA	13036126	13040104	+	ENSMUST00000114791	ENSMUSG00000026727	Rsu1	Leucine-rich repeat||-||Leucine rich repeat 4||Leucine-rich repeat, typical subtype	13076821	13271333	-	36716	downstream
ENSMUSG00000103143.1	Gm37742	Annotated_lncRNA	13036126	13040104	+	ENSMUST00000028063	ENSMUSG00000026730	Pter	Phosphotriesterase||Aryldialkylphosphatase, zinc-binding site	12924100	13001614	+	34511	downstream
ENSMUSG00000103143.1	Gm37742	Annotated_lncRNA	13036126	13040104	+	ENSMUST00000191959	ENSMUSG00000026727	Rsu1	Leucine-rich repeat||-||Leucine rich repeat 4||Leucine-rich repeat, typical subtype	13077195	13271394	-	37090	downstream
ENSMUSG00000103143.1	Gm37742	Annotated_lncRNA	13036126	13040104	+	ENSMUST00000028059	ENSMUSG00000026727	Rsu1	Leucine-rich repeat||-||Leucine rich repeat 4||Leucine-rich repeat, typical subtype	13077012	13271415	-	36907	downstream
XLOC_034780	--	Novel_lncRNA	72473593	72511752	+	ENSMUST00000074231	ENSMUSG00000073002	Vamp5	Synaptobrevin||Synaptobrevin/Vesicle-associated membrane protein	72369034	72380468	-	93124	upstream
XLOC_034780	--	Novel_lncRNA	72473593	72511752	+	ENSMUST00000114071	ENSMUSG00000056737	Capg	Villin/Gelsolin||Gelsolin-like domain	72549273	72562983	+	37520	upstream
XLOC_034780	--	Novel_lncRNA	72473593	72511752	+	ENSMUST00000114072	ENSMUSG00000056737	Capg	Villin/Gelsolin||Gelsolin-like domain	72544537	72562981	+	32784	upstream
XLOC_034780	--	Novel_lncRNA	72473593	72511752	+	ENSMUST00000142613	ENSMUSG00000050732	Vamp8	Synaptobrevin||Synaptobrevin/Vesicle-associated membrane protein	72385228	72389911	-	83681	upstream
XLOC_034780	--	Novel_lncRNA	72473593	72511752	+	ENSMUST00000065906	ENSMUSG00000053460	Ggcx	RmlC-like cupin domain||HTTM||Vitamin K-dependent gamma-carboxylase	72414308	72430712	+	42880	downstream
XLOC_034780	--	Novel_lncRNA	72473593	72511752	+	ENSMUST00000205335	ENSMUSG00000053907	Mat2a	S-adenosylmethionine synthetase||S-adenosylmethionine synthetase, N-terminal||S-adenosylmethionine synthetase superfamily||S-adenosylmethionine synthetase, conserved site||S-adenosylmethionine synthetase, C-terminal||S-adenosylmethionine synthetase, central domain	72432799	72439556	-	34036	upstream
XLOC_034780	--	Novel_lncRNA	72473593	72511752	+	ENSMUST00000148108	ENSMUSG00000056698	Elmod3	ELMO domain||-	72569328	72598361	-	57575	downstream
XLOC_034780	--	Novel_lncRNA	72473593	72511752	+	ENSMUST00000101285	ENSMUSG00000073002	Vamp5	Synaptobrevin||Synaptobrevin/Vesicle-associated membrane protein	72369028	72380422	-	93170	upstream
XLOC_034780	--	Novel_lncRNA	72473593	72511752	+	ENSMUST00000176168	ENSMUSG00000056666	Retsat	-	72598628	72607381	+	86875	upstream
XLOC_034780	--	Novel_lncRNA	72473593	72511752	+	ENSMUST00000205384	ENSMUSG00000053907	Mat2a	S-adenosylmethionine synthetase||S-adenosylmethionine synthetase, N-terminal||S-adenosylmethionine synthetase superfamily||S-adenosylmethionine synthetase, conserved site||S-adenosylmethionine synthetase, C-terminal||S-adenosylmethionine synthetase, central domain	72435811	72439388	-	34204	upstream
XLOC_034780	--	Novel_lncRNA	72473593	72511752	+	ENSMUST00000134809	ENSMUSG00000056737	Capg	Villin/Gelsolin||Gelsolin-like domain	72549652	72555824	+	37899	upstream
XLOC_034780	--	Novel_lncRNA	72473593	72511752	+	ENSMUST00000070524	ENSMUSG00000056429	Tgoln1	-	72608432	72617000	-	96679	downstream
XLOC_034780	--	Novel_lncRNA	72473593	72511752	+	ENSMUST00000176364	ENSMUSG00000056666	Retsat	-	72598628	72607381	+	86875	upstream
XLOC_034780	--	Novel_lncRNA	72473593	72511752	+	ENSMUST00000070990	ENSMUSG00000056698	Elmod3	ELMO domain||-	72565934	72598343	-	54181	downstream
XLOC_034780	--	Novel_lncRNA	72473593	72511752	+	ENSMUST00000059472	ENSMUSG00000053907	Mat2a	S-adenosylmethionine synthetase||S-adenosylmethionine synthetase, N-terminal||S-adenosylmethionine synthetase superfamily||S-adenosylmethionine synthetase, conserved site||S-adenosylmethionine synthetase, C-terminal||S-adenosylmethionine synthetase, central domain	72432799	72439558	-	34034	upstream
XLOC_034780	--	Novel_lncRNA	72473593	72511752	+	ENSMUST00000162561	ENSMUSG00000052631	Sh2d6	SH2 domain	72513656	72520627	-	1903	downstream
XLOC_034780	--	Novel_lncRNA	72473593	72511752	+	ENSMUST00000152705	ENSMUSG00000056698	Elmod3	ELMO domain||-	72587623	72598413	-	75870	downstream
XLOC_034780	--	Novel_lncRNA	72473593	72511752	+	ENSMUST00000114069	ENSMUSG00000056698	Elmod3	ELMO domain||-	72565922	72598342	-	54169	downstream
XLOC_034780	--	Novel_lncRNA	72473593	72511752	+	ENSMUST00000159877	ENSMUSG00000052631	Sh2d6	SH2 domain	72513656	72520650	-	1903	downstream
XLOC_034780	--	Novel_lncRNA	72473593	72511752	+	ENSMUST00000155705	ENSMUSG00000056737	Capg	Villin/Gelsolin||Gelsolin-like domain	72549451	72555866	+	37698	upstream
XLOC_034780	--	Novel_lncRNA	72473593	72511752	+	ENSMUST00000155188	ENSMUSG00000056737	Capg	Villin/Gelsolin||Gelsolin-like domain	72545793	72556252	+	34040	upstream
XLOC_034780	--	Novel_lncRNA	72473593	72511752	+	ENSMUST00000071044	ENSMUSG00000056737	Capg	Villin/Gelsolin||Gelsolin-like domain	72544391	72562983	+	32638	upstream
XLOC_034780	--	Novel_lncRNA	72473593	72511752	+	ENSMUST00000129071	ENSMUSG00000056666	Retsat	-	72606645	72607211	+	94892	upstream
XLOC_034780	--	Novel_lncRNA	72473593	72511752	+	ENSMUST00000141833	ENSMUSG00000056698	Elmod3	ELMO domain||-	72567550	72598395	-	55797	downstream
XLOC_034780	--	Novel_lncRNA	72473593	72511752	+	ENSMUST00000205823	ENSMUSG00000053907	Mat2a	S-adenosylmethionine synthetase||S-adenosylmethionine synthetase, N-terminal||S-adenosylmethionine synthetase superfamily||S-adenosylmethionine synthetase, conserved site||S-adenosylmethionine synthetase, C-terminal||S-adenosylmethionine synthetase, central domain	72432800	72434991	-	38601	upstream
XLOC_034780	--	Novel_lncRNA	72473593	72511752	+	ENSMUST00000126101	ENSMUSG00000056737	Capg	Villin/Gelsolin||Gelsolin-like domain	72552938	72558257	+	41185	upstream
XLOC_034780	--	Novel_lncRNA	72473593	72511752	+	ENSMUST00000206692	ENSMUSG00000053907	Mat2a	S-adenosylmethionine synthetase||S-adenosylmethionine synthetase, N-terminal||S-adenosylmethionine synthetase superfamily||S-adenosylmethionine synthetase, conserved site||S-adenosylmethionine synthetase, C-terminal||S-adenosylmethionine synthetase, central domain	72434545	72439556	-	34036	upstream
XLOC_034780	--	Novel_lncRNA	72473593	72511752	+	ENSMUST00000126124	ENSMUSG00000056737	Capg	Villin/Gelsolin||Gelsolin-like domain	72547940	72557770	+	36187	upstream
XLOC_034780	--	Novel_lncRNA	72473593	72511752	+	ENSMUST00000205878	ENSMUSG00000056666	Retsat	-	72605972	72607442	+	94219	upstream
XLOC_034780	--	Novel_lncRNA	72473593	72511752	+	ENSMUST00000089687	ENSMUSG00000052631	Sh2d6	SH2 domain	72513654	72520538	-	1901	downstream
XLOC_034780	--	Novel_lncRNA	72473593	72511752	+	ENSMUST00000059983	ENSMUSG00000050732	Vamp8	Synaptobrevin||Synaptobrevin/Vesicle-associated membrane protein	72385223	72390703	-	82889	upstream
XLOC_034780	--	Novel_lncRNA	72473593	72511752	+	ENSMUST00000070597	ENSMUSG00000056666	Retsat	-	72598475	72608425	+	86722	upstream
XLOC_034486	--	Novel_lncRNA	50535621	50538023	+	ENSMUST00000161401	ENSMUSG00000063694	Cycs	Cytochrome c-like domain||Cytochrome c, class IA/ IB	50562563	50566538	-	24539	downstream
XLOC_034486	--	Novel_lncRNA	50535621	50538023	+	ENSMUST00000071728	ENSMUSG00000029822	Osbpl3	-||Oxysterol-binding protein, conserved site||Pleckstrin homology domain||Oxysterol-binding protein	50296799	50456170	-	79450	upstream
XLOC_034486	--	Novel_lncRNA	50535621	50538023	+	ENSMUST00000146341	ENSMUSG00000029822	Osbpl3	-||Oxysterol-binding protein, conserved site||Pleckstrin homology domain||Oxysterol-binding protein	50348085	50456161	-	79459	upstream
XLOC_034486	--	Novel_lncRNA	50535621	50538023	+	ENSMUST00000031852	ENSMUSG00000029828	4921507P07Rik	Protein of unknown function DUF4555	50573302	50596632	-	35278	downstream
XLOC_019845	--	Novel_lncRNA	38118520	38121212	-	ENSMUST00000193828	ENSMUSG00000051375	Pcdh1	Cadherin||Cadherin, N-terminal||Cadherin-like||Protocadherin||Cadherin conserved site||-	38203444	38210554	-	82231	downstream
XLOC_019845	--	Novel_lncRNA	38118520	38121212	-	ENSMUST00000057185	ENSMUSG00000051375	Pcdh1	Cadherin||Cadherin, N-terminal||Cadherin-like||Protocadherin||Cadherin conserved site||-	38196694	38209762	-	75481	downstream
XLOC_019845	--	Novel_lncRNA	38118520	38121212	-	ENSMUST00000194312	ENSMUSG00000051375	Pcdh1	Cadherin||Cadherin, N-terminal||Cadherin-like||Protocadherin||Cadherin conserved site||-	38203444	38203840	-	82231	downstream
XLOC_019845	--	Novel_lncRNA	38118520	38121212	-	ENSMUST00000159405	ENSMUSG00000051375	Pcdh1	Cadherin||Cadherin, N-terminal||Cadherin-like||Protocadherin||Cadherin conserved site||-	38196694	38211970	-	75481	downstream
XLOC_019845	--	Novel_lncRNA	38118520	38121212	-	ENSMUST00000160721	ENSMUSG00000051375	Pcdh1	Cadherin||Cadherin, N-terminal||Cadherin-like||Protocadherin||Cadherin conserved site||-	38185914	38212053	-	64701	downstream
XLOC_019845	--	Novel_lncRNA	38118520	38121212	-	ENSMUST00000161701	ENSMUSG00000051375	Pcdh1	Cadherin||Cadherin, N-terminal||Cadherin-like||Protocadherin||Cadherin conserved site||-	38188890	38203163	-	67677	downstream
XLOC_011944	--	Novel_lncRNA	98833960	98838274	-	ENSMUST00000040340	ENSMUSG00000041685	Fcho2	Muniscin C-terminal||Mu homology domain||FCH domain	98723407	98815449	-	18510	upstream
XLOC_011944	--	Novel_lncRNA	98833960	98838274	-	ENSMUST00000109399	ENSMUSG00000009470	Tnpo1	Importin-beta, N-terminal domain||Armadillo-type fold	98839019	98891040	-	744	downstream
XLOC_011944	--	Novel_lncRNA	98833960	98838274	-	ENSMUST00000179271	ENSMUSG00000009470	Tnpo1	Importin-beta, N-terminal domain||Armadillo-type fold	98875642	98891014	-	37367	downstream
XLOC_011944	--	Novel_lncRNA	98833960	98838274	-	ENSMUST00000109403	ENSMUSG00000041685	Fcho2	Muniscin C-terminal||Mu homology domain||FCH domain	98753840	98815449	-	18510	upstream
XLOC_011944	--	Novel_lncRNA	98833960	98838274	-	ENSMUST00000109401	ENSMUSG00000009470	Tnpo1	Importin-beta, N-terminal domain||Armadillo-type fold	98839019	98926384	-	744	downstream
XLOC_011944	--	Novel_lncRNA	98833960	98838274	-	ENSMUST00000099277	ENSMUSG00000041685	Fcho2	Muniscin C-terminal||Mu homology domain||FCH domain	98723407	98815449	-	18510	upstream
XLOC_011944	--	Novel_lncRNA	98833960	98838274	-	ENSMUST00000179563	ENSMUSG00000041685	Fcho2	Muniscin C-terminal||Mu homology domain||FCH domain	98751872	98815449	-	18510	upstream
XLOC_011944	--	Novel_lncRNA	98833960	98838274	-	ENSMUST00000179301	ENSMUSG00000009470	Tnpo1	Importin-beta, N-terminal domain||Armadillo-type fold	98849223	98890998	-	10948	downstream
XLOC_026383	--	Novel_lncRNA	131492750	131500993	+	ENSMUST00000197057	ENSMUSG00000050931	Sgms2	Sphingomyelin synthase-like domain||-	131342169	131490479	-	2270	upstream
XLOC_026383	--	Novel_lncRNA	131492750	131500993	+	ENSMUST00000029666	ENSMUSG00000028032	Papss1	P-loop containing nucleoside triphosphate hydrolase||-||PUA-like domain||Adenylyl-sulfate kinase||Sulphate adenylyltransferase catalytic domain||Sulphate adenylyltransferase||ATP-sulfurylase PUA-like domain	131564768	131643671	+	63774	upstream
XLOC_026383	--	Novel_lncRNA	131492750	131500993	+	ENSMUST00000199878	ENSMUSG00000028032	Papss1	P-loop containing nucleoside triphosphate hydrolase||-||PUA-like domain||Adenylyl-sulfate kinase||Sulphate adenylyltransferase catalytic domain||Sulphate adenylyltransferase||ATP-sulfurylase PUA-like domain	131564896	131643670	+	63902	upstream
XLOC_026383	--	Novel_lncRNA	131492750	131500993	+	ENSMUST00000200527	ENSMUSG00000028032	Papss1	P-loop containing nucleoside triphosphate hydrolase||-||PUA-like domain||Adenylyl-sulfate kinase||Sulphate adenylyltransferase catalytic domain||Sulphate adenylyltransferase||ATP-sulfurylase PUA-like domain	131564899	131643671	+	63905	upstream
XLOC_026383	--	Novel_lncRNA	131492750	131500993	+	ENSMUST00000196408	ENSMUSG00000028032	Papss1	P-loop containing nucleoside triphosphate hydrolase||-||PUA-like domain||Adenylyl-sulfate kinase||Sulphate adenylyltransferase catalytic domain||Sulphate adenylyltransferase||ATP-sulfurylase PUA-like domain	131564897	131579425	+	63903	upstream
ENSMUSG00000097715.1	Gpr137b-ps	Annotated_lncRNA	12619084	12650297	-	ENSMUST00000104944	ENSMUSG00000078141	Gm2399	-	12702362	12702589	+	52064	upstream
ENSMUSG00000097715.1	Gpr137b-ps	Annotated_lncRNA	12619084	12650297	-	ENSMUST00000071973	ENSMUSG00000057069	Ero1lb	Endoplasmic reticulum oxidoreductin 1	12565883	12609526	+	9557	downstream
ENSMUSG00000097715.1	Gpr137b-ps	Annotated_lncRNA	12619084	12650297	-	ENSMUST00000179308	ENSMUSG00000095105	Edaradd	Death domain||Death-like domain	12471209	12520450	-	98633	upstream
ENSMUSG00000078706.4	Gm53	Annotated_lncRNA	96251105	96264484	+	ENSMUST00000100523	ENSMUSG00000075588	Hoxb2	Homeobox, conserved site||Homeodomain-like||Homeodomain, metazoa||Homeobox domain||Homeobox protein, antennapedia type, conserved site	96351631	96354012	+	87146	upstream
ENSMUSG00000078706.4	Gm53	Annotated_lncRNA	96251105	96264484	+	ENSMUST00000062709	ENSMUSG00000049604	Hoxb13	Homeobox, conserved site||Homeobox domain||Homeodomain-like||Homeobox protein Hox1A3 N-terminal	96194316	96197447	+	53657	downstream
ENSMUSG00000078706.4	Gm53	Annotated_lncRNA	96251105	96264484	+	ENSMUST00000000010	ENSMUSG00000020875	Hoxb9	Homeodomain, metazoa||Homeobox domain||Homeodomain-like||Homeobox protein Hox9||Homeobox, conserved site||Hox9, N-terminal activation domain	96271457	96276595	+	6972	upstream
ENSMUSG00000078706.4	Gm53	Annotated_lncRNA	96251105	96264484	+	ENSMUST00000125410	ENSMUSG00000056648	Hoxb8	Helix-turn-helix motif||Homeobox, conserved site||Homeodomain, metazoa||Homeobox protein, antennapedia type, conserved site||Homeodomain-like||Homeobox domain||Homeobox protein, antennapedia type	96282556	96284315	+	18071	upstream
ENSMUSG00000078706.4	Gm53	Annotated_lncRNA	96251105	96264484	+	ENSMUST00000174042	ENSMUSG00000020875	Hoxb9	Homeodomain, metazoa||Homeobox domain||Homeodomain-like||Homeobox protein Hox9||Homeobox, conserved site||Hox9, N-terminal activation domain	96271523	96276595	+	7038	upstream
ENSMUSG00000078706.4	Gm53	Annotated_lncRNA	96251105	96264484	+	ENSMUST00000049352	ENSMUSG00000038721	Hoxb7	Homeobox protein, antennapedia type||Homeobox domain||Homeodomain, metazoa||Homeodomain-like||Homeobox protein, antennapedia type, conserved site||Homeobox, conserved site	96286623	96290162	+	22138	upstream
ENSMUSG00000078706.4	Gm53	Annotated_lncRNA	96251105	96264484	+	ENSMUST00000049241	ENSMUSG00000038692	Hoxb4	Homeobox, conserved site||Homeobox protein, antennapedia type||Homeodomain, metazoa||Homeodomain-like||Homeobox domain||Homeobox protein, antennapedia type, conserved site	96318267	96321638	+	53782	upstream
ENSMUSG00000078706.4	Gm53	Annotated_lncRNA	96251105	96264484	+	ENSMUST00000049272	ENSMUSG00000038700	Hoxb5	Homeobox domain||Homeodomain, metazoa||Homeodomain-like||Homeobox protein, antennapedia type, conserved site||Homeobox protein, antennapedia type||Homeobox, conserved site	96303512	96306120	+	39027	upstream
ENSMUSG00000078706.4	Gm53	Annotated_lncRNA	96251105	96264484	+	ENSMUST00000000704	ENSMUSG00000000690	Hoxb6	Homeobox protein, antennapedia type||Homeodomain, metazoa||Homeobox protein, antennapedia type, conserved site||Homeodomain-like||Homeobox domain||Homeobox, conserved site	96299171	96301568	+	34686	upstream
ENSMUSG00000078706.4	Gm53	Annotated_lncRNA	96251105	96264484	+	ENSMUST00000093944	ENSMUSG00000048763	Hoxb3	-||Homeobox, conserved site||Homeodomain, metazoa||Homeobox domain||Homeodomain-like||Homeobox protein, antennapedia type, conserved site||Domain of unknown function DUF4074	96323326	96347930	+	58841	upstream
ENSMUSG00000078706.4	Gm53	Annotated_lncRNA	96251105	96264484	+	ENSMUST00000168043	ENSMUSG00000056648	Hoxb8	Helix-turn-helix motif||Homeobox, conserved site||Homeodomain, metazoa||Homeobox protein, antennapedia type, conserved site||Homeodomain-like||Homeobox domain||Homeobox protein, antennapedia type	96282725	96284693	+	18240	upstream
ENSMUSG00000078706.4	Gm53	Annotated_lncRNA	96251105	96264484	+	ENSMUST00000123091	ENSMUSG00000048763	Hoxb3	-||Homeobox, conserved site||Homeodomain, metazoa||Homeobox domain||Homeodomain-like||Homeobox protein, antennapedia type, conserved site||Domain of unknown function DUF4074	96328062	96344303	+	63577	upstream
ENSMUSG00000078706.4	Gm53	Annotated_lncRNA	96251105	96264484	+	ENSMUST00000052650	ENSMUSG00000056648	Hoxb8	Helix-turn-helix motif||Homeobox, conserved site||Homeodomain, metazoa||Homeobox protein, antennapedia type, conserved site||Homeodomain-like||Homeobox domain||Homeobox protein, antennapedia type	96281905	96285315	+	17420	upstream
ENSMUSG00000078706.4	Gm53	Annotated_lncRNA	96251105	96264484	+	ENSMUST00000167258	ENSMUSG00000038756	Ttll6	Tubulin-tyrosine ligase/Tubulin polyglutamylase	96133786	96165451	+	85653	downstream
ENSMUSG00000078706.4	Gm53	Annotated_lncRNA	96251105	96264484	+	ENSMUST00000107680	ENSMUSG00000038756	Ttll6	Tubulin-tyrosine ligase/Tubulin polyglutamylase	96134219	96165451	+	85653	downstream
ENSMUSG00000078706.4	Gm53	Annotated_lncRNA	96251105	96264484	+	ENSMUST00000173432	ENSMUSG00000000690	Hoxb6	Homeobox protein, antennapedia type||Homeodomain, metazoa||Homeobox protein, antennapedia type, conserved site||Homeodomain-like||Homeobox domain||Homeobox, conserved site	96292476	96301569	+	27991	upstream
ENSMUSG00000078706.4	Gm53	Annotated_lncRNA	96251105	96264484	+	ENSMUST00000055334	ENSMUSG00000048763	Hoxb3	-||Homeobox, conserved site||Homeodomain, metazoa||Homeobox domain||Homeodomain-like||Homeobox protein, antennapedia type, conserved site||Domain of unknown function DUF4074	96343769	96346507	+	79284	upstream
XLOC_016622	--	Novel_lncRNA	20444864	20471086	-	ENSMUST00000003319	ENSMUSG00000003234	Abcf3	P-loop containing nucleoside triphosphate hydrolase||ABC transporter-like||ABC transporter, conserved site||AAA+ ATPase domain	20548577	20561379	+	77490	upstream
XLOC_016622	--	Novel_lncRNA	20444864	20471086	-	ENSMUST00000115547	ENSMUSG00000022822	Abcc5	P-loop containing nucleoside triphosphate hydrolase||-||ABC transporter-like||ABC transporter type 1, transmembrane domain||ABC transporter, conserved site||AAA+ ATPase domain	20331306	20426335	-	18528	upstream
XLOC_016622	--	Novel_lncRNA	20444864	20471086	-	ENSMUST00000096199	ENSMUSG00000022822	Abcc5	P-loop containing nucleoside triphosphate hydrolase||-||ABC transporter-like||ABC transporter type 1, transmembrane domain||ABC transporter, conserved site||AAA+ ATPase domain	20400761	20426354	-	18509	upstream
XLOC_016622	--	Novel_lncRNA	20444864	20471086	-	ENSMUST00000171774	ENSMUSG00000003233	Dvl3	Dishevelled family||Ubiquitin-related domain||Dishevelled C-terminal||DIX domain||DEP domain||Dishevelled protein domain||Dishevelled-3||PDZ domain	20517106	20531646	+	46019	upstream
XLOC_016622	--	Novel_lncRNA	20444864	20471086	-	ENSMUST00000079158	ENSMUSG00000022822	Abcc5	P-loop containing nucleoside triphosphate hydrolase||-||ABC transporter-like||ABC transporter type 1, transmembrane domain||ABC transporter, conserved site||AAA+ ATPase domain	20331303	20426394	-	18469	upstream
XLOC_016622	--	Novel_lncRNA	20444864	20471086	-	ENSMUST00000007216	ENSMUSG00000022841	Ap2m1	Clathrin adaptor, mu subunit||Longin-like domain||Mu homology domain||Clathrin adaptor, mu subunit, conserved site||AP complex, mu/sigma subunit	20535480	20544909	+	64393	upstream
XLOC_016622	--	Novel_lncRNA	20444864	20471086	-	ENSMUST00000077867	ENSMUSG00000022822	Abcc5	P-loop containing nucleoside triphosphate hydrolase||-||ABC transporter-like||ABC transporter type 1, transmembrane domain||ABC transporter, conserved site||AAA+ ATPase domain	20392675	20425986	-	18877	upstream
XLOC_016622	--	Novel_lncRNA	20444864	20471086	-	ENSMUST00000090023	ENSMUSG00000022841	Ap2m1	Clathrin adaptor, mu subunit||Longin-like domain||Mu homology domain||Clathrin adaptor, mu subunit, conserved site||AP complex, mu/sigma subunit	20535478	20544056	+	64391	upstream
XLOC_016622	--	Novel_lncRNA	20444864	20471086	-	ENSMUST00000148714	ENSMUSG00000003235	Eif2b5	Hexapeptide repeat||Nucleotide-diphospho-sugar transferases||W2 domain||Armadillo-type fold||Trimeric LpxA-like	20506398	20509323	+	35311	upstream
XLOC_016622	--	Novel_lncRNA	20444864	20471086	-	ENSMUST00000003318	ENSMUSG00000003233	Dvl3	Dishevelled family||Ubiquitin-related domain||Dishevelled C-terminal||DIX domain||DEP domain||Dishevelled protein domain||Dishevelled-3||PDZ domain	20516982	20531650	+	45895	upstream
XLOC_016622	--	Novel_lncRNA	20444864	20471086	-	ENSMUST00000003320	ENSMUSG00000003235	Eif2b5	Hexapeptide repeat||Nucleotide-diphospho-sugar transferases||W2 domain||Armadillo-type fold||Trimeric LpxA-like	20498817	20509955	+	27730	upstream
XLOC_016622	--	Novel_lncRNA	20444864	20471086	-	ENSMUST00000171572	ENSMUSG00000003233	Dvl3	Dishevelled family||Ubiquitin-related domain||Dishevelled C-terminal||DIX domain||DEP domain||Dishevelled protein domain||Dishevelled-3||PDZ domain	20517064	20532520	+	45977	upstream
XLOC_016824	--	Novel_lncRNA	49522250	49644589	-	ENSMUST00000142682	ENSMUSG00000032965	Ift57	Intra-flagellar transport protein 57	49699304	49762628	+	54714	upstream
XLOC_016824	--	Novel_lncRNA	49522250	49644589	-	ENSMUST00000046777	ENSMUSG00000032965	Ift57	Intra-flagellar transport protein 57	49699233	49765126	+	54643	upstream
XLOC_016824	--	Novel_lncRNA	49522250	49644589	-	ENSMUST00000140914	ENSMUSG00000032965	Ift57	Intra-flagellar transport protein 57	49710922	49764116	+	66332	upstream
ENSMUSG00000106334.1	Gm43549	Annotated_lncRNA	55578105	55582730	-	ENSMUST00000198437	ENSMUSG00000027797	Dclk1	Protein kinase domain||Serine/threonine/dual specificity protein kinase, catalytic domain||Serine/threonine-protein kinase, active site||Neuronal migration protein doublecortin, chordata||Doublecortin domain||Protein kinase, ATP binding site||-||Protein kinase-like domain	55461916	55536551	+	41553	downstream
ENSMUSG00000106334.1	Gm43549	Annotated_lncRNA	55578105	55582730	-	ENSMUST00000200352	ENSMUSG00000027797	Dclk1	Protein kinase domain||Serine/threonine/dual specificity protein kinase, catalytic domain||Serine/threonine-protein kinase, active site||Neuronal migration protein doublecortin, chordata||Doublecortin domain||Protein kinase, ATP binding site||-||Protein kinase-like domain	55461972	55522282	+	55822	downstream
ENSMUSG00000106334.1	Gm43549	Annotated_lncRNA	55578105	55582730	-	ENSMUST00000198412	ENSMUSG00000027797	Dclk1	Protein kinase domain||Serine/threonine/dual specificity protein kinase, catalytic domain||Serine/threonine-protein kinase, active site||Neuronal migration protein doublecortin, chordata||Doublecortin domain||Protein kinase, ATP binding site||-||Protein kinase-like domain	55461899	55536552	+	41552	downstream
ENSMUSG00000106334.1	Gm43549	Annotated_lncRNA	55578105	55582730	-	ENSMUST00000199702	ENSMUSG00000027797	Dclk1	Protein kinase domain||Serine/threonine/dual specificity protein kinase, catalytic domain||Serine/threonine-protein kinase, active site||Neuronal migration protein doublecortin, chordata||Doublecortin domain||Protein kinase, ATP binding site||-||Protein kinase-like domain	55461916	55535135	+	42969	downstream
ENSMUSG00000106334.1	Gm43549	Annotated_lncRNA	55578105	55582730	-	ENSMUST00000029374	ENSMUSG00000027799	Nbea	PH-BEACH domain||BEACH domain||WD40-repeat-containing domain||Concanavalin A-like lectin/glucanase domain||Domain of unknown function DUF1088||WD40 repeat||Armadillo-type fold	55625195	56183701	-	42464	downstream
ENSMUSG00000106334.1	Gm43549	Annotated_lncRNA	55578105	55582730	-	ENSMUST00000196745	ENSMUSG00000027797	Dclk1	Protein kinase domain||Serine/threonine/dual specificity protein kinase, catalytic domain||Serine/threonine-protein kinase, active site||Neuronal migration protein doublecortin, chordata||Doublecortin domain||Protein kinase, ATP binding site||-||Protein kinase-like domain	55242364	55539068	+	39036	downstream
ENSMUSG00000106334.1	Gm43549	Annotated_lncRNA	55578105	55582730	-	ENSMUST00000070418	ENSMUSG00000027797	Dclk1	Protein kinase domain||Serine/threonine/dual specificity protein kinase, catalytic domain||Serine/threonine-protein kinase, active site||Neuronal migration protein doublecortin, chordata||Doublecortin domain||Protein kinase, ATP binding site||-||Protein kinase-like domain	55461758	55539064	+	39040	downstream
ENSMUSG00000106334.1	Gm43549	Annotated_lncRNA	55578105	55582730	-	ENSMUST00000199169	ENSMUSG00000027797	Dclk1	Protein kinase domain||Serine/threonine/dual specificity protein kinase, catalytic domain||Serine/threonine-protein kinase, active site||Neuronal migration protein doublecortin, chordata||Doublecortin domain||Protein kinase, ATP binding site||-||Protein kinase-like domain	55461916	55517200	+	60904	downstream
ENSMUSG00000106334.1	Gm43549	Annotated_lncRNA	55578105	55582730	-	ENSMUST00000054237	ENSMUSG00000027797	Dclk1	Protein kinase domain||Serine/threonine/dual specificity protein kinase, catalytic domain||Serine/threonine-protein kinase, active site||Neuronal migration protein doublecortin, chordata||Doublecortin domain||Protein kinase, ATP binding site||-||Protein kinase-like domain	55242526	55539064	+	39040	downstream
XLOC_010942	--	Novel_lncRNA	108563650	108565415	+	ENSMUST00000122041	ENSMUSG00000021699	Pde4d	3'5'-cyclic nucleotide phosphodiesterase, catalytic domain||-||3'5'-cyclic nucleotide phosphodiesterase, conserved site||3'5'-cyclic nucleotide phosphodiesterase	108654177	109951474	+	88761	upstream
ENSMUSG00000097930.1	C330002G04Rik	Annotated_lncRNA	23037390	23075853	-	ENSMUST00000087576	ENSMUSG00000052387	Trpm3	-||Ion transport domain	22139119	22989882	+	47507	downstream
ENSMUSG00000097930.1	C330002G04Rik	Annotated_lncRNA	23037390	23075853	-	ENSMUST00000037901	ENSMUSG00000052387	Trpm3	-||Ion transport domain	22448283	22989884	+	47505	downstream
ENSMUSG00000097930.1	C330002G04Rik	Annotated_lncRNA	23037390	23075853	-	ENSMUST00000074770	ENSMUSG00000052387	Trpm3	-||Ion transport domain	22139119	22989882	+	47507	downstream
ENSMUSG00000097930.1	C330002G04Rik	Annotated_lncRNA	23037390	23075853	-	ENSMUST00000036884	ENSMUSG00000033863	Klf9	Zinc finger, C2H2||Zinc finger, C2H2-like	23141226	23166911	+	65372	upstream
ENSMUSG00000097930.1	C330002G04Rik	Annotated_lncRNA	23037390	23075853	-	ENSMUST00000099569	ENSMUSG00000052387	Trpm3	-||Ion transport domain	22139119	22989882	+	47507	downstream
ENSMUSG00000105517.1	Gm42436	Annotated_lncRNA	41002434	41006089	+	ENSMUST00000159774	ENSMUSG00000037818	3110057O12Rik	Alpha/Beta hydrolase fold||Protein of unknown function DUF2048	40894145	40938138	+	64295	downstream
ENSMUSG00000105517.1	Gm42436	Annotated_lncRNA	41002434	41006089	+	ENSMUST00000026862	ENSMUSG00000025762	Larp1b	RNA-binding protein Lupus La||Protein of unknown function DM15||-	41033944	41040196	+	27854	upstream
ENSMUSG00000105517.1	Gm42436	Annotated_lncRNA	41002434	41006089	+	ENSMUST00000048490	ENSMUSG00000025762	Larp1b	RNA-binding protein Lupus La||Protein of unknown function DM15||-	40950354	40978165	+	24268	downstream
ENSMUSG00000105517.1	Gm42436	Annotated_lncRNA	41002434	41006089	+	ENSMUST00000200432	ENSMUSG00000025762	Larp1b	RNA-binding protein Lupus La||Protein of unknown function DM15||-	40950818	40962228	+	40205	downstream
ENSMUSG00000105517.1	Gm42436	Annotated_lncRNA	41002434	41006089	+	ENSMUST00000203472	ENSMUSG00000037818	3110057O12Rik	Alpha/Beta hydrolase fold||Protein of unknown function DUF2048	40894263	40917098	+	85335	downstream
ENSMUSG00000105517.1	Gm42436	Annotated_lncRNA	41002434	41006089	+	ENSMUST00000203892	ENSMUSG00000037818	3110057O12Rik	Alpha/Beta hydrolase fold||Protein of unknown function DUF2048	40894345	40917420	+	85013	downstream
ENSMUSG00000105517.1	Gm42436	Annotated_lncRNA	41002434	41006089	+	ENSMUST00000108077	ENSMUSG00000037818	3110057O12Rik	Alpha/Beta hydrolase fold||Protein of unknown function DUF2048	40894322	40937137	+	65296	downstream
ENSMUSG00000105517.1	Gm42436	Annotated_lncRNA	41002434	41006089	+	ENSMUST00000203650	ENSMUSG00000037818	3110057O12Rik	Alpha/Beta hydrolase fold||Protein of unknown function DUF2048	40894306	40923778	+	78655	downstream
ENSMUSG00000105517.1	Gm42436	Annotated_lncRNA	41002434	41006089	+	ENSMUST00000058578	ENSMUSG00000049940	Pgrmc2	Cytochrome b5-like heme/steroid binding domain	41066326	41083046	-	60236	downstream
ENSMUSG00000105517.1	Gm42436	Annotated_lncRNA	41002434	41006089	+	ENSMUST00000099121	ENSMUSG00000025762	Larp1b	RNA-binding protein Lupus La||Protein of unknown function DM15||-	41024373	41039236	+	18283	upstream
ENSMUSG00000105517.1	Gm42436	Annotated_lncRNA	41002434	41006089	+	ENSMUST00000191872	ENSMUSG00000025762	Larp1b	RNA-binding protein Lupus La||Protein of unknown function DM15||-	40950792	40977629	+	24804	downstream
ENSMUSG00000105517.1	Gm42436	Annotated_lncRNA	41002434	41006089	+	ENSMUST00000191805	ENSMUSG00000025762	Larp1b	RNA-binding protein Lupus La||Protein of unknown function DM15||-	40962169	40977782	+	24651	downstream
ENSMUSG00000105517.1	Gm42436	Annotated_lncRNA	41002434	41006089	+	ENSMUST00000108078	ENSMUSG00000037818	3110057O12Rik	Alpha/Beta hydrolase fold||Protein of unknown function DUF2048	40846970	40936307	+	66126	downstream
ENSMUSG00000105517.1	Gm42436	Annotated_lncRNA	41002434	41006089	+	ENSMUST00000099123	ENSMUSG00000074619	1700034I23Rik	FUN14	40900196	40902543	-	99890	upstream
XLOC_038251	--	Novel_lncRNA	84430237	84467543	+	ENSMUST00000085077	ENSMUSG00000015709	Arnt2	PAS fold||PAC motif||Nuclear translocator||Myc-type, basic helix-loop-helix (bHLH) domain||PAS domain	84246281	84409959	-	20277	upstream
XLOC_038322	--	Novel_lncRNA	89518799	89532713	+	ENSMUST00000041761	ENSMUSG00000039405	Prss23	Peptidase S1, PA clan||Serine proteases, trypsin domain||Peptidase S1, trypsin family, active site	89507785	89517586	-	1212	upstream
XLOC_038322	--	Novel_lncRNA	89518799	89532713	+	ENSMUST00000172178	ENSMUSG00000092071	A230065N10Rik	-	89632097	89633124	-	99383	downstream
XLOC_038322	--	Novel_lncRNA	89518799	89532713	+	ENSMUST00000032856	ENSMUSG00000030621	Me3	Malic enzyme, NAD-binding||Malic enzyme, N-terminal domain||Malic oxidoreductase||Malic enzyme, conserved site	89632703	89854359	+	99989	upstream
