# Supplementary material for: Altered Expression of Long Noncoding and Messenger RNAs in Diabetic Nephropathy following Treatment with Rosiglitazone
Source: Biomed Res Int. 2020 Jan 12;2020:1360843. doi: 10.1155/2020/1360843 (PMC6983290; doi:10.1155/2020/1360843)
Supplement: Supplementary Materials — Supplementary Table 1: significantly upregulated mRNAs in dbdb mice compared to the control group. Supplementary Table 2: significantly downregulated mRNAs in dbdb mice compared to the control group. Supplementary Table 3: significantly upregulated mRNAs in dbR mice compared to the dbdb group. Supplementary Table 4: significantly downregulated mRNAs in dbR mice compared to the dbdb group. Supplementary Table 5: mRNAs significantly upregulated by diabetic nephropathy yet reversed following rosiglitazone treatment. Supplementary Table 6: mRNAs significantly downregulated by diabetic nephropathy yet reversed following rosiglitazone treatment. Supplementary Table 7: significantly upregulated lncRNAs in dbdb mice compared to the control group. Supplementary Table 8: significantly downregulated lncRNAs in dbdb mice compared to the control group. Supplementary Table 9: significantly upregulated lncRNAs in dbR mice compared to the dbdb group. Supplementary Table 10: significantly downregulated lncRNAs in dbR mice compared to the dbdb group. Supplementary Table 11: lncRNAs significantly upregulated by diabetic nephropathy yet reversed following rosiglitazone treatment. Supplementary Table 12: lncRNAs significantly downregulated by diabetic nephropathy yet reversed following rosiglitazone treatment. Supplementary Table 13: differentially expressed lncRNAs colocated with genes. Supplementary Table 14: differentially expressed lncRNAs coexpressed with genes. Supplementary Table 15: top 20 significantly enriched GO terms associated with differentially expressed mRNAs in the kidneys of dbdb mice compared to the controls. Supplementary Table 16: top 20 significantly enriched GO terms associated with differentially expressed mRNAs in the kidneys of dbR mice compared to the dbdb group. Supplementary Table 17: top 20 significantly enriched GO terms associated with differentially expressed lncRNAs coexpressed with genes in the kidneys of dbdb mice compared to the controls. Supplementa [file 1360843.f1.zip › 1360843.f1/Supplementary Table 14.xls]

## Sheet: Sheet1
Supplementary Table 14 Differentially expressed lncRNAs co-expressed with genes
lncRNA_ID	lncRNA_Gene_ID	lncRNA_Gene_Symbol	Status	mRNA_ID	mRNA_Gene_ID	mRNA_Gene_Symbol	mRNA_Gene_Description	Pearson_correlation	Pvalue
ENSMUST00000145581.1	ENSMUSG00000085180.1	AI838599	Annotated_lncRNA	ENSMUST00000107596	ENSMUSG00000038453	Srcin1	Actin interacting protein 3, C-terminal||-	0.970992	1.33059e-05
ENSMUST00000145581.1	ENSMUSG00000085180.1	AI838599	Annotated_lncRNA	ENSMUST00000030693	ENSMUSG00000028874	Fgr	Protein kinase-like domain||Protein kinase, ATP binding site||SH2 domain||Tyrosine-protein kinase, catalytic domain||Serine-threonine/tyrosine-protein kinase catalytic domain||Tyrosine-protein kinase, active site||Protein kinase domain||SH3 domain	-0.95937	4.27783e-05
ENSMUST00000145581.1	ENSMUSG00000085180.1	AI838599	Annotated_lncRNA	ENSMUST00000003183	ENSMUSG00000003099	Ppp5c	Tetratricopeptide repeat||Tetratricopeptide repeat 1||PPP domain||Metallo-dependent phosphatase-like||Tetratricopeptide repeat-containing domain||Calcineurin-like phosphoesterase domain, apaH type||Serine/threonine-specific protein phosphatase/bis(5-nucleosyl)-tetraphosphatase	0.952475	7.35417e-05
ENSMUST00000145581.1	ENSMUSG00000085180.1	AI838599	Annotated_lncRNA	ENSMUST00000022995	ENSMUSG00000022366	Slc22a22	Major facilitator superfamily||Major facilitator superfamily domain||Sugar transporter, conserved site	-0.950509	8.45837e-05
ENSMUST00000145581.1	ENSMUSG00000085180.1	AI838599	Annotated_lncRNA	ENSMUST00000114964	ENSMUSG00000061751	Kalrn	Spectrin repeat||Pleckstrin homology domain||Immunoglobulin-like domain||SH3 domain||Protein kinase domain||CRAL-TRIO lipid binding domain||Protein kinase-like domain||Spectrin/alpha-actinin||Fibronectin type III||Protein kinase, ATP binding site||Immunoglobulin subtype 2||Serine/threonine-protein kinase, active site||Serine/threonine/dual specificity protein kinase, catalytic domain||Dbl homolog…	0.953696	6.72183e-05
ENSMUST00000145581.1	ENSMUSG00000085180.1	AI838599	Annotated_lncRNA	ENSMUST00000050975	ENSMUSG00000044505	Lingo4	Cysteine-rich flanking region, C-terminal||Leucine-rich repeat, typical subtype||Immunoglobulin-like domain||Leucine-rich repeat N-terminal domain||Immunoglobulin subtype||Leucine-rich repeat||Immunoglobulin I-set||Immunoglobulin subtype 2	0.98771	6.69482e-07
ENSMUST00000145581.1	ENSMUSG00000085180.1	AI838599	Annotated_lncRNA	ENSMUST00000090380	ENSMUSG00000039704	Lmbrd2	LMBR1-like membrane protein	-0.960959	3.72617e-05
ENSMUST00000145581.1	ENSMUSG00000085180.1	AI838599	Annotated_lncRNA	ENSMUST00000132034	ENSMUSG00000038803	Ost4	Oligosaccaryltransferase	-0.9585	4.60316e-05
ENSMUST00000145581.1	ENSMUSG00000085180.1	AI838599	Annotated_lncRNA	ENSMUST00000022518	ENSMUSG00000021951	N6amt2	S-adenosyl-L-methionine-dependent methyltransferase||Protein-lysine N-methyltransferase Efm5||DNA methylase, N-6 adenine-specific, conserved site	-0.961816	3.45071e-05
ENSMUST00000145581.1	ENSMUSG00000085180.1	AI838599	Annotated_lncRNA	ENSMUST00000015511	ENSMUSG00000030123	Plxnd1	Plexin repeat||Sema domain||Rho GTPase activation protein||Plexin, cytoplasmic RasGAP domain||Plexin-like fold||Immunoglobulin E-set||IPT domain	-0.959826	4.1141e-05
ENSMUST00000145581.1	ENSMUSG00000085180.1	AI838599	Annotated_lncRNA	ENSMUST00000045542	ENSMUSG00000033985	Tesk2	Protein kinase-like domain||Protein kinase, ATP binding site||Serine-threonine/tyrosine-protein kinase catalytic domain||Tyrosine-protein kinase, active site||Protein kinase domain	0.969775	1.53461e-05
ENSMUST00000145581.1	ENSMUSG00000085180.1	AI838599	Annotated_lncRNA	ENSMUST00000109566	ENSMUSG00000061689	Dlgap4	SAPAP family||-	0.951596	7.83411e-05
ENSMUST00000145581.1	ENSMUSG00000085180.1	AI838599	Annotated_lncRNA	ENSMUST00000055028	ENSMUSG00000049657	Zbtb5	Zinc finger, C2H2||POZ domain||BTB/POZ domain||Zinc finger, C2H2-like	0.96254	3.22934e-05
ENSMUST00000145581.1	ENSMUSG00000085180.1	AI838599	Annotated_lncRNA	ENSMUST00000035214	ENSMUSG00000032594	Ip6k1	-||Inositol polyphosphate kinase	0.956031	5.62117e-05
ENSMUST00000145581.1	ENSMUSG00000085180.1	AI838599	Annotated_lncRNA	ENSMUST00000025567	ENSMUSG00000024665	Fads2	Fatty acid desaturase domain||Fatty acid desaturase||Cytochrome b5-like heme/steroid binding domain	-0.975496	7.40367e-06
ENSMUST00000145581.1	ENSMUSG00000085180.1	AI838599	Annotated_lncRNA	ENSMUST00000180252	ENSMUSG00000096847	Tmem151b	Transmembrane protein 151	0.959157	4.35598e-05
ENSMUST00000145581.1	ENSMUSG00000085180.1	AI838599	Annotated_lncRNA	ENSMUST00000020524	ENSMUSG00000020282	Rhbdf1	-||Rhomboid serine protease||Peptidase S54, rhomboid domain	0.977874	5.19218e-06
ENSMUST00000145581.1	ENSMUSG00000085180.1	AI838599	Annotated_lncRNA	ENSMUST00000069620	ENSMUSG00000055866	Per2	PAS fold-3||Period circadian-like, C-terminal||PAS domain	0.967855	1.90003e-05
ENSMUST00000145581.1	ENSMUSG00000085180.1	AI838599	Annotated_lncRNA	ENSMUST00000000395	ENSMUSG00000000385	Tmprss2	Low-density lipoprotein (LDL) receptor class A, conserved site||Peptidase S1A, chymotrypsin-type||Peptidase S1, PA clan||Peptidase S1, trypsin family, active site||Serine proteases, trypsin domain||SRCR-like domain||SRCR domain||Low-density lipoprotein (LDL) receptor class A repeat	0.973997	9.10079e-06
ENSMUST00000145581.1	ENSMUSG00000085180.1	AI838599	Annotated_lncRNA	ENSMUST00000087867	ENSMUSG00000073016	Uprt	Phosphoribosyltransferase-like	-0.960924	3.73757e-05
ENSMUST00000145581.1	ENSMUSG00000085180.1	AI838599	Annotated_lncRNA	ENSMUST00000148798	ENSMUSG00000027185	Nat10	Acyl-CoA N-acyltransferase||-||Helicase domain||Domain of unknown function DUF1726||Possible tRNA binding domain||GNAT domain	0.955821	5.71457e-05
ENSMUST00000145581.1	ENSMUSG00000085180.1	AI838599	Annotated_lncRNA	ENSMUST00000204714	ENSMUSG00000029632	Ndufa4	NADH-ubiquinone reductase complex 1 MLRQ subunit	-0.97225	1.14076e-05
ENSMUST00000145581.1	ENSMUSG00000085180.1	AI838599	Annotated_lncRNA	ENSMUST00000045726	ENSMUSG00000040146	Rgl3	Ras-associating (RA) domain||Ras-like guanine nucleotide exchange factor, N-terminal||Ras guanine-nucleotide exchange factors catalytic domain||Ubiquitin-related domain||Ras guanine-nucleotide exchange factor, conserved site	0.959944	4.07234e-05
ENSMUST00000145581.1	ENSMUSG00000085180.1	AI838599	Annotated_lncRNA	ENSMUST00000085635	ENSMUSG00000066595	Mfsd7b	Major facilitator superfamily domain||Major facilitator superfamily	0.950324	8.56785e-05
ENSMUST00000145581.1	ENSMUSG00000085180.1	AI838599	Annotated_lncRNA	ENSMUST00000077890	ENSMUSG00000036555	Iqce	P-loop containing nucleoside triphosphate hydrolase||-||IQ motif, EF-hand binding site	0.967646	1.94338e-05
ENSMUST00000145581.1	ENSMUSG00000085180.1	AI838599	Annotated_lncRNA	ENSMUST00000064370	ENSMUSG00000052496	Pkdrej	Polycystin cation channel, PKD1/PKD2||PKD/REJ-like domain||Polycystic kidney disease type 2 protein||PLAT/LH2 domain||REJ domain	0.967957	1.87937e-05
ENSMUST00000145581.1	ENSMUSG00000085180.1	AI838599	Annotated_lncRNA	ENSMUST00000126534	ENSMUSG00000033685	Ucp2	Mitochondrial brown fat uncoupling protein||Mitochondrial substrate/solute carrier	0.960262	3.96161e-05
ENSMUST00000145581.1	ENSMUSG00000085180.1	AI838599	Annotated_lncRNA	ENSMUST00000047761	ENSMUSG00000022132	Cldn10	Claudin, conserved site||Claudin-10||PMP-22/EMP/MP20/Claudin superfamily	-0.97211	1.1609e-05
ENSMUST00000145581.1	ENSMUSG00000085180.1	AI838599	Annotated_lncRNA	ENSMUST00000094782	ENSMUSG00000028894	Inpp5b	Rho GTPase activation protein||Inositol polyphosphate-related phosphatase||Rho GTPase-activating protein domain||-||Endonuclease/exonuclease/phosphatase	0.954356	6.39675e-05
ENSMUST00000145581.1	ENSMUSG00000085180.1	AI838599	Annotated_lncRNA	ENSMUST00000025019	ENSMUSG00000073433	Arhgdig	Immunoglobulin E-set||Rho protein GDP-dissociation inhibitor	0.962126	3.3545e-05
ENSMUST00000145581.1	ENSMUSG00000085180.1	AI838599	Annotated_lncRNA	ENSMUST00000099396	ENSMUSG00000054027	Nt5dc3	HAD-like domain||Purine 5'-nucleotidase||HAD-superfamily hydrolase, subfamily IG, 5'-nucleotidase	0.951265	8.02095e-05
ENSMUST00000145581.1	ENSMUSG00000085180.1	AI838599	Annotated_lncRNA	ENSMUST00000044505	ENSMUSG00000004347	Pde1c	3'5'-cyclic nucleotide phosphodiesterase N-terminal||3'5'-cyclic nucleotide phosphodiesterase, conserved site||-||3'5'-cyclic nucleotide phosphodiesterase, catalytic domain||HD/PDEase domain||3'5'-cyclic nucleotide phosphodiesterase	0.959871	4.09796e-05
ENSMUST00000145581.1	ENSMUSG00000085180.1	AI838599	Annotated_lncRNA	ENSMUST00000063446	ENSMUSG00000061878	Sphk1	Diacylglycerol kinase, catalytic domain||NAD kinase/diacylglycerol kinase-like domain	0.952499	7.34125e-05
ENSMUST00000145581.1	ENSMUSG00000085180.1	AI838599	Annotated_lncRNA	ENSMUST00000015456	ENSMUSG00000015312	Gadd45b	50S ribosomal protein L30e-like||Ribosomal protein L7Ae/L30e/S12e/Gadd45	0.952949	7.10359e-05
ENSMUST00000145581.1	ENSMUSG00000085180.1	AI838599	Annotated_lncRNA	ENSMUST00000093852	ENSMUSG00000066687	Zbtb16	Zinc finger, C2H2||Zinc finger, C2H2-like||BTB/POZ domain||POZ domain	0.964103	2.78607e-05
ENSMUST00000145581.1	ENSMUSG00000085180.1	AI838599	Annotated_lncRNA	ENSMUST00000026625	ENSMUSG00000025545	Clybl	HpcH/HpaI aldolase/citrate lyase domain||Citrate lyase beta subunit-like||Pyruvate/Phosphoenolpyruvate kinase-like domain	-0.951318	7.99055e-05
ENSMUST00000145581.1	ENSMUSG00000085180.1	AI838599	Annotated_lncRNA	ENSMUST00000058196	ENSMUSG00000021384	Susd3	Sushi/SCR/CCP domain||-	0.950564	8.42642e-05
ENSMUST00000145581.1	ENSMUSG00000085180.1	AI838599	Annotated_lncRNA	ENSMUST00000003397	ENSMUSG00000003309	Ap1m2	AP complex, mu/sigma subunit||Clathrin adaptor, mu subunit, conserved site||Mu homology domain||Longin-like domain||Clathrin adaptor, mu subunit	0.955986	5.64107e-05
ENSMUST00000145581.1	ENSMUSG00000085180.1	AI838599	Annotated_lncRNA	ENSMUST00000040791	ENSMUSG00000038879	Nipal2	Magnesium transporter NIPA	0.953162	6.99332e-05
ENSMUST00000145581.1	ENSMUSG00000085180.1	AI838599	Annotated_lncRNA	ENSMUST00000021271	ENSMUSG00000020893	Per1	-||Period circadian-like, C-terminal||PAS domain	0.956417	5.4525e-05
ENSMUST00000145581.1	ENSMUSG00000085180.1	AI838599	Annotated_lncRNA	ENSMUST00000194134	ENSMUSG00000027820	Mme	Peptidase M13, C-terminal domain||Peptidase M13, N-terminal domain	-0.950882	8.24027e-05
ENSMUST00000145581.1	ENSMUSG00000085180.1	AI838599	Annotated_lncRNA	ENSMUST00000039742	ENSMUSG00000035878	Hykk	Aminoglycoside phosphotransferase||Protein kinase-like domain	-0.954131	6.50598e-05
ENSMUST00000145581.1	ENSMUSG00000085180.1	AI838599	Annotated_lncRNA	ENSMUST00000078647	ENSMUSG00000030055	Rab43	Small GTPase superfamily||P-loop containing nucleoside triphosphate hydrolase||Small GTP-binding protein domain||Small GTPase superfamily, Rho type||Ran GTPase||Small GTPase superfamily, Ras type||Small GTPase superfamily, Rab type	0.960515	3.87491e-05
ENSMUST00000145581.1	ENSMUSG00000085180.1	AI838599	Annotated_lncRNA	ENSMUST00000071522	ENSMUSG00000057913	Gm10032	-	0.980708	3.22263e-06
ENSMUST00000145581.1	ENSMUSG00000085180.1	AI838599	Annotated_lncRNA	ENSMUST00000019386	ENSMUSG00000005251	Ripk4	Protein kinase domain||Serine/threonine-protein kinase, active site||Protein kinase-like domain||Serine/threonine/dual specificity protein kinase, catalytic domain||Ankyrin repeat-containing domain||Ankyrin repeat||Protein kinase, ATP binding site	0.960914	3.74115e-05
ENSMUST00000145581.1	ENSMUSG00000085180.1	AI838599	Annotated_lncRNA	ENSMUST00000044602	ENSMUSG00000057074	Ces1g	Alpha/Beta hydrolase fold||Carboxylesterase type B, active site||Carboxylesterase, type B||Carboxylesterase type B, conserved site	-0.978753	4.50894e-06
ENSMUST00000145581.1	ENSMUSG00000085180.1	AI838599	Annotated_lncRNA	ENSMUST00000045847	ENSMUSG00000040857	Erf	Ets domain	0.975181	7.74013e-06
LNC_000215	XLOC_017824	--	Novel_lncRNA	ENSMUST00000040967	ENSMUSG00000066278	Vps37b	Modifier of rudimentary, Modr	0.958953	4.43178e-05
LNC_000215	XLOC_017824	--	Novel_lncRNA	ENSMUST00000117786	ENSMUSG00000022433	Csnk1e	Protein kinase, ATP binding site||Serine/threonine/dual specificity protein kinase, catalytic domain||Protein kinase-like domain||Protein kinase domain||Serine/threonine-protein kinase, active site	0.966298	2.23887e-05
LNC_000215	XLOC_017824	--	Novel_lncRNA	ENSMUST00000094452	ENSMUSG00000063430	Wscd2	P-loop containing nucleoside triphosphate hydrolase||Carbohydrate-binding WSC, subgroup||Carbohydrate-binding WSC	0.961385	3.58726e-05
LNC_000215	XLOC_017824	--	Novel_lncRNA	ENSMUST00000136925	ENSMUSG00000001436	Slc19a1	Reduced folate carrier||Major facilitator superfamily domain||Folate transporter 1	0.963422	2.9734e-05
LNC_000215	XLOC_017824	--	Novel_lncRNA	ENSMUST00000049545	ENSMUSG00000045318	Adra2c	GPCR, rhodopsin-like, 7TM||G protein-coupled receptor, rhodopsin-like||Alpha 2C adrenoceptor||Adrenoceptor family	0.975068	7.86355e-06
LNC_000215	XLOC_017824	--	Novel_lncRNA	ENSMUST00000095655	ENSMUSG00000044086	Lmod3	Tropomodulin	0.958178	4.72788e-05
LNC_000215	XLOC_017824	--	Novel_lncRNA	ENSMUST00000057910	ENSMUSG00000047417	Rexo1	Ribonuclease H-like domain||Exonuclease, RNase T/DNA polymerase III||-	0.953634	6.75318e-05
LNC_000215	XLOC_017824	--	Novel_lncRNA	ENSMUST00000118765	ENSMUSG00000029462	Vps29	Calcineurin-like phosphoesterase domain, lpxH type||-||Metallo-dependent phosphatase-like||Phosphodiesterase MJ0936/Vps29	-0.967722	1.92752e-05
LNC_000215	XLOC_017824	--	Novel_lncRNA	ENSMUST00000107950	ENSMUSG00000045411	2410002F23Rik	-	0.95098	8.18403e-05
LNC_000215	XLOC_017824	--	Novel_lncRNA	ENSMUST00000031304	ENSMUSG00000029359	Tesc	EF-Hand 1, calcium-binding site||EF-hand domain	0.974961	7.98104e-06
LNC_000215	XLOC_017824	--	Novel_lncRNA	ENSMUST00000162252	ENSMUSG00000036395	Glb1l2	Glycoside hydrolase, family 35||Glycoside hydrolase, family 35, conserved site||Beta-galactosidase 1-like||Glycoside hydrolase superfamily||Glycoside hydrolase 35, catalytic domain||Galactose-binding domain-like	0.972827	1.06043e-05
LNC_000215	XLOC_017824	--	Novel_lncRNA	ENSMUST00000019516	ENSMUSG00000075590	Nrbp2	Protein kinase-like domain	0.963927	2.83374e-05
LNC_000215	XLOC_017824	--	Novel_lncRNA	ENSMUST00000126569	ENSMUSG00000050931	Sgms2	Sphingomyelin synthase-like domain||-	-0.954041	6.5505e-05
LNC_000215	XLOC_017824	--	Novel_lncRNA	ENSMUST00000095228	ENSMUSG00000079003	Samd1	Sterile alpha motif domain||Sterile alpha motif/pointed domain	0.955243	5.97731e-05
LNC_000211	XLOC_017820	--	Novel_lncRNA	ENSMUST00000105275	ENSMUSG00000020189	Osbpl8	Oxysterol-binding protein, conserved site||Pleckstrin homology domain||Oxysterol-binding protein	-0.952246	7.47731e-05
LNC_000211	XLOC_017820	--	Novel_lncRNA	ENSMUST00000039286	ENSMUSG00000038160	Atg5	Autophagy-related protein 5	-0.95941	4.26316e-05
LNC_000211	XLOC_017820	--	Novel_lncRNA	ENSMUST00000115020	ENSMUSG00000001173	Ocrl	Inositol polyphosphate-related phosphatase||Rho GTPase-activating protein domain||Rho GTPase activation protein||Endonuclease/exonuclease/phosphatase	0.963982	2.81867e-05
LNC_000211	XLOC_017820	--	Novel_lncRNA	ENSMUST00000115645	ENSMUSG00000005732	Ranbp1	Ran binding domain	-0.951968	7.62869e-05
LNC_000211	XLOC_017820	--	Novel_lncRNA	ENSMUST00000127058	ENSMUSG00000041237	Pklr	Pyruvate kinase, active site||Pyruvate kinase||Pyruvate kinase, barrel||Pyruvate/Phosphoenolpyruvate kinase-like domain||Pyruvate kinase, C-terminal||Pyruvate kinase-like, insert domain	0.970512	1.40853e-05
LNC_000211	XLOC_017820	--	Novel_lncRNA	ENSMUST00000072289	ENSMUSG00000061981	Flot2	-||Band 7 protein	0.977742	5.3e-06
LNC_000211	XLOC_017820	--	Novel_lncRNA	ENSMUST00000021715	ENSMUSG00000021287	Xrcc3	DNA recombination and repair protein RecA-like, ATP-binding domain||P-loop containing nucleoside triphosphate hydrolase||DNA recombination and repair protein Rad51, C-terminal||DNA recombination and repair protein, RecA-like	0.957697	4.91874e-05
LNC_000211	XLOC_017820	--	Novel_lncRNA	ENSMUST00000121542	ENSMUSG00000073436	Eme2	-||ERCC4 domain	-0.965018	2.54764e-05
LNC_000211	XLOC_017820	--	Novel_lncRNA	ENSMUST00000140738	ENSMUSG00000061046	Haghl	Hydroxyacylglutathione hydrolase||Metallo-beta-lactamase	-0.977003	5.93827e-06
LNC_000211	XLOC_017820	--	Novel_lncRNA	ENSMUST00000110461	ENSMUSG00000021109	Hif1a	Myc-type, basic helix-loop-helix (bHLH) domain||Hypoxia-inducible factor, alpha subunit||PAS domain||PAC motif||Hypoxia-inducible factor-1 alpha||PAS fold||HIF-1 alpha, transactivation domain, C-terminal	0.964286	2.73715e-05
LNC_000211	XLOC_017820	--	Novel_lncRNA	ENSMUST00000164056	ENSMUSG00000048897	Zfp710	Zinc finger, C2H2-like||Zinc finger, C2H2||-	0.952751	7.20735e-05
LNC_000211	XLOC_017820	--	Novel_lncRNA	ENSMUST00000028117	ENSMUSG00000026775	Yme1l1	ATPase, AAA-type, core||Peptidase M41||P-loop containing nucleoside triphosphate hydrolase||Peptidase, FtsH||ATPase, AAA-type, conserved site||AAA+ ATPase domain	-0.96452	2.67543e-05
LNC_000211	XLOC_017820	--	Novel_lncRNA	ENSMUST00000004955	ENSMUSG00000020528	Prpsap2	Ribose-phosphate pyrophosphokinase, N-terminal domain||Phosphoribosyltransferase-like||Ribose-phosphate diphosphokinase	-0.95499	6.09487e-05
LNC_000211	XLOC_017820	--	Novel_lncRNA	ENSMUST00000048309	ENSMUSG00000041570	Camsap2	PRC-barrel-like||CKK domain||Calponin homology domain	-0.966072	2.29117e-05
ENSMUST00000184605.7	ENSMUSG00000098747.7	Gm27216	Annotated_lncRNA	ENSMUST00000001806	ENSMUSG00000001755	Coasy	P-loop containing nucleoside triphosphate hydrolase||Cytidyltransferase-like domain||Dephospho-CoA kinase	0.98216	2.45388e-06
ENSMUST00000184605.7	ENSMUSG00000098747.7	Gm27216	Annotated_lncRNA	ENSMUST00000107302	ENSMUSG00000017801	Mlx	Myc-type, basic helix-loop-helix (bHLH) domain	0.951609	7.82709e-05
ENSMUST00000184605.7	ENSMUSG00000098747.7	Gm27216	Annotated_lncRNA	ENSMUST00000112243	ENSMUSG00000042064	Myo3b	Protein kinase, ATP binding site||Myosin head, motor domain||Protein kinase-like domain||Serine/threonine-protein kinase, active site||IQ motif, EF-hand binding site||Serine/threonine/dual specificity protein kinase, catalytic domain||P-loop containing nucleoside triphosphate hydrolase||Protein kinase domain	-0.959486	4.23561e-05
ENSMUST00000184605.7	ENSMUSG00000098747.7	Gm27216	Annotated_lncRNA	ENSMUST00000111827	ENSMUSG00000079262	Slco1a6	Major facilitator superfamily domain||Organic anion transporter polypeptide OATP||Kazal domain||-	0.980715	3.21812e-06
ENSMUST00000184605.7	ENSMUSG00000098747.7	Gm27216	Annotated_lncRNA	ENSMUST00000061895	ENSMUSG00000023452	Pisd	-||Phosphatidylserine decarboxylase-related	0.977798	5.25373e-06
ENSMUST00000184605.7	ENSMUSG00000098747.7	Gm27216	Annotated_lncRNA	ENSMUST00000003268	ENSMUSG00000003200	Sh3gl1	SH3 domain||BAR domain	-0.952192	7.50609e-05
ENSMUST00000184605.7	ENSMUSG00000098747.7	Gm27216	Annotated_lncRNA	ENSMUST00000002048	ENSMUSG00000001983	Taco1	YebC-like||Transcriptional regulator TACO1-like	0.956512	5.41156e-05
ENSMUST00000184605.7	ENSMUSG00000098747.7	Gm27216	Annotated_lncRNA	ENSMUST00000124259	ENSMUSG00000006345	Ggt1	Nucleophile aminohydrolases, N-terminal||Gamma-glutamyltranspeptidase||-	0.976907	6.02445e-06
ENSMUST00000184605.7	ENSMUSG00000098747.7	Gm27216	Annotated_lncRNA	ENSMUST00000155030	ENSMUSG00000024220	Zfp523	Zinc finger, C2H2-like||Zinc finger, C2H2||-	-0.952747	7.2098e-05
ENSMUST00000184605.7	ENSMUSG00000098747.7	Gm27216	Annotated_lncRNA	ENSMUST00000030771	ENSMUSG00000029014	Dnajc2	DnaJ domain, conserved site||DnaJ domain||Myb domain||Homeodomain-like||SANT/Myb domain||SANT domain	0.953883	6.62834e-05
ENSMUST00000184605.7	ENSMUSG00000098747.7	Gm27216	Annotated_lncRNA	ENSMUST00000041065	ENSMUSG00000035441	Myo1d	IQ motif, EF-hand binding site||P-loop containing nucleoside triphosphate hydrolase||Myosin head, motor domain||Unconventional myosin tail, actin- and lipid-binding	-0.96245	3.25632e-05
ENSMUST00000184605.7	ENSMUSG00000098747.7	Gm27216	Annotated_lncRNA	ENSMUST00000025357	ENSMUSG00000024480	Ap3s1	AP complex, mu/sigma subunit||Clathrin adaptor complex, small chain||Adaptor protein complex, sigma subunit||Longin-like domain	0.976143	6.7464e-06
ENSMUST00000184605.7	ENSMUSG00000098747.7	Gm27216	Annotated_lncRNA	ENSMUST00000141158	ENSMUSG00000013033	Adgrl1	Olfactomedin-like domain||GPCR, family 2, extracellular hormone receptor domain||GPCR, family 2, secretin-like||GPCR, family 2-like||GPCR, family 2, latrophilin||GPS motif||GPCR, family 2, latrophilin, C-terminal||GPCR, family 2, secretin-like, conserved site||D-galactoside/L-rhamnose binding SUEL lectin domain	-0.961277	3.62215e-05
ENSMUST00000184605.7	ENSMUSG00000098747.7	Gm27216	Annotated_lncRNA	ENSMUST00000142166	ENSMUSG00000020839	Tmigd1	Immunoglobulin subtype||Immunoglobulin I-set||Immunoglobulin-like domain||Immunoglobulin subtype 2	0.962775	3.15957e-05
ENSMUST00000184605.7	ENSMUSG00000098747.7	Gm27216	Annotated_lncRNA	ENSMUST00000029147	ENSMUSG00000027618	Nfs1	Cysteine desulfurase IscS||Aminotransferase class V domain||Aminotransferase class-V, pyridoxal-phosphate binding site||Pyridoxal phosphate-dependent transferase||Cysteine desulfurase	0.965544	2.41724e-05
ENSMUST00000184605.7	ENSMUSG00000098747.7	Gm27216	Annotated_lncRNA	ENSMUST00000022954	ENSMUSG00000022332	Khdrbs3	K Homology domain, type 1||K Homology domain	0.957744	4.89976e-05
ENSMUST00000184605.7	ENSMUSG00000098747.7	Gm27216	Annotated_lncRNA	ENSMUST00000131804	ENSMUSG00000031441	Atp11a	P-type ATPase, A domain||P-type ATPase, phosphorylation site||-||P-type ATPase, cytoplasmic domain N||P-type ATPase, subfamily IV||P-type ATPase||HAD-like domain	0.973458	9.77364e-06
ENSMUST00000184605.7	ENSMUSG00000098747.7	Gm27216	Annotated_lncRNA	ENSMUST00000138014	ENSMUSG00000038298	Pdzk1	PDZ domain	0.950273	8.59845e-05
ENSMUST00000184605.7	ENSMUSG00000098747.7	Gm27216	Annotated_lncRNA	ENSMUST00000055052	ENSMUSG00000061825	Ces2c	Alpha/Beta hydrolase fold||Carboxylesterase type B, active site||Carboxylesterase, type B||Carboxylesterase type B, conserved site	0.952967	7.09422e-05
ENSMUST00000184605.7	ENSMUSG00000098747.7	Gm27216	Annotated_lncRNA	ENSMUST00000082235	ENSMUSG00000024313	Mep1b	Concanavalin A-like lectin/glucanase domain||EGF-like domain||Peptidase, metallopeptidase||MATH/TRAF domain||Peptidase M12A, astacin||MAM domain||TRAF-like||Meprin alpha/beta subunit	0.958995	4.41587e-05
ENSMUST00000184605.7	ENSMUSG00000098747.7	Gm27216	Annotated_lncRNA	ENSMUST00000003569	ENSMUSG00000003477	Inmt	S-adenosyl-L-methionine-dependent methyltransferase||Methyltransferase, NNMT/PNMT/TEMT||Methyltransferase NNMT/PNMT/TEMT, conserved site	0.950147	8.67382e-05
ENSMUST00000184605.7	ENSMUSG00000098747.7	Gm27216	Annotated_lncRNA	ENSMUST00000095899	ENSMUSG00000096054	Syne1	Spectrin repeat||Actinin-type actin-binding domain, conserved site||Spectrin/alpha-actinin||Calponin homology domain||KASH domain	-0.982288	2.39296e-06
ENSMUST00000184605.7	ENSMUSG00000098747.7	Gm27216	Annotated_lncRNA	ENSMUST00000036236	ENSMUSG00000038388	Mpp6	L27 domain||SH3 domain||Guanylate kinase, conserved site||P-loop containing nucleoside triphosphate hydrolase||PDZ domain||L27 domain, C-terminal||Guanylate kinase/L-type calcium channel beta subunit||Variant SH3 domain||Guanylate kinase-like domain	0.973324	9.94559e-06
ENSMUST00000184605.7	ENSMUSG00000098747.7	Gm27216	Annotated_lncRNA	ENSMUST00000097888	ENSMUSG00000041530	Ago1	Argonaute, linker 1 domain||PAZ domain||Piwi domain||-||Ribonuclease H-like domain	-0.959645	4.17859e-05
ENSMUST00000184605.7	ENSMUSG00000098747.7	Gm27216	Annotated_lncRNA	ENSMUST00000038498	ENSMUSG00000037316	Bag4	BAG domain	-0.96722	2.03351e-05
ENSMUST00000184605.7	ENSMUSG00000098747.7	Gm27216	Annotated_lncRNA	ENSMUST00000021956	ENSMUSG00000021494	Ddx41	Helicase superfamily 1/2, ATP-binding domain||DEAD/DEAH box helicase domain||RNA helicase, DEAD-box type, Q motif||Helicase, C-terminal||P-loop containing nucleoside triphosphate hydrolase	0.956456	5.4359e-05
ENSMUST00000184605.7	ENSMUSG00000098747.7	Gm27216	Annotated_lncRNA	ENSMUST00000066279	ENSMUSG00000036206	Sh3bp4	Variant SH3 domain||ZU5 domain||SH3 domain	-0.951507	7.88444e-05
ENSMUST00000184605.7	ENSMUSG00000098747.7	Gm27216	Annotated_lncRNA	ENSMUST00000110690	ENSMUSG00000022186	Oxct1	Coenzyme A transferase family I||3-oxoacid CoA-transferase, subunit A||3-oxoacid CoA-transferase||Coenzyme A transferase binding site||3-oxoacid CoA-transferase, subunit B||Coenzyme A transferase active site	0.979332	4.09585e-06
ENSMUST00000184605.7	ENSMUSG00000098747.7	Gm27216	Annotated_lncRNA	ENSMUST00000007249	ENSMUSG00000007034	Slc44a4	Choline transporter-like	0.967955	1.87963e-05
ENSMUST00000184605.7	ENSMUSG00000098747.7	Gm27216	Annotated_lncRNA	ENSMUST00000110698	ENSMUSG00000055737	Ghr	Growth hormone/erythropoietin receptor, ligand binding||Growth hormone-binding protein||Fibronectin type III||Long hematopoietin receptor, single chain, conserved site	0.978889	4.40938e-06
ENSMUST00000184605.7	ENSMUSG00000098747.7	Gm27216	Annotated_lncRNA	ENSMUST00000101429	ENSMUSG00000029810	Tmem176b	CD20-like family	0.984613	1.46585e-06
ENSMUST00000184605.7	ENSMUSG00000098747.7	Gm27216	Annotated_lncRNA	ENSMUST00000020258	ENSMUSG00000020064	Herc4	HECT domain||Regulator of chromosome condensation 1/beta-lactamase-inhibitor protein II||Regulator of chromosome condensation, RCC1	0.985467	1.20126e-06
ENSMUST00000184605.7	ENSMUSG00000098747.7	Gm27216	Annotated_lncRNA	ENSMUST00000028426	ENSMUSG00000027035	Cers6	TRAM/LAG1/CLN8 homology domain||Homeobox domain||Homeodomain-like||Ceramide synthase component Lag1/Lac1	0.966842	2.11596e-05
ENSMUST00000184605.7	ENSMUSG00000098747.7	Gm27216	Annotated_lncRNA	ENSMUST00000020529	ENSMUSG00000020288	Ahsa2	Activator of Hsp90 ATPase, N-terminal||Activator of Hsp90 ATPase homologue 1-like	0.954573	6.29209e-05
ENSMUST00000184605.7	ENSMUSG00000098747.7	Gm27216	Annotated_lncRNA	ENSMUST00000045748	ENSMUSG00000035232	Pdk3	Histidine kinase domain||Histidine kinase-like ATPase, C-terminal domain||Branched-chain alpha-ketoacid dehydrogenase kinase/Pyruvate dehydrogenase kinase, N-terminal	0.971887	1.19344e-05
ENSMUST00000184605.7	ENSMUSG00000098747.7	Gm27216	Annotated_lncRNA	ENSMUST00000043149	ENSMUSG00000042351	Grap2	SH2 domain||SH3 domain	0.962889	3.12612e-05
ENSMUST00000184605.7	ENSMUSG00000098747.7	Gm27216	Annotated_lncRNA	ENSMUST00000022450	ENSMUSG00000040651	Fam208a	Protein of unknown function DUF3715	0.965296	2.47817e-05
ENSMUST00000184605.7	ENSMUSG00000098747.7	Gm27216	Annotated_lncRNA	ENSMUST00000047978	ENSMUSG00000042229	Rabif	Mss4||Mss4-like	0.96683	2.11865e-05
ENSMUST00000184605.7	ENSMUSG00000098747.7	Gm27216	Annotated_lncRNA	ENSMUST00000099441	ENSMUSG00000033114	Slc35d2	Sugar phosphate transporter domain	0.961483	3.5558e-05
ENSMUST00000184605.7	ENSMUSG00000098747.7	Gm27216	Annotated_lncRNA	ENSMUST00000069330	ENSMUSG00000001348	Acp5	Acid phosphatase, type 5||Metallo-dependent phosphatase-like||Calcineurin-like phosphoesterase domain, apaH type	0.979762	3.80666e-06
ENSMUST00000184605.7	ENSMUSG00000098747.7	Gm27216	Annotated_lncRNA	ENSMUST00000102980	ENSMUSG00000001642	Akr1b3	Aldo/keto reductase, conserved site||Aldo/keto reductase subgroup||NADP-dependent oxidoreductase domain	0.96365	2.90971e-05
ENSMUST00000184605.7	ENSMUSG00000098747.7	Gm27216	Annotated_lncRNA	ENSMUST00000168419	ENSMUSG00000024644	Cndp2	Peptidase M20||Glutathione degradosome, DUG1||Peptidase M20, dimerisation domain||ArgE/DapE/ACY1/CPG2/YscS, conserved site	0.952943	7.10694e-05
ENSMUST00000184605.7	ENSMUSG00000098747.7	Gm27216	Annotated_lncRNA	ENSMUST00000046515	ENSMUSG00000027698	Nceh1	Alpha/beta hydrolase fold-3||-||Alpha/Beta hydrolase fold||Arylacetamide deacetylase||Lipase, GDXG, active site	0.964176	2.76644e-05
ENSMUST00000184605.7	ENSMUSG00000098747.7	Gm27216	Annotated_lncRNA	ENSMUST00000035890	ENSMUSG00000041052	Slc7a13	Amino acid/polyamine transporter I	0.987937	6.27298e-07
ENSMUST00000184605.7	ENSMUSG00000098747.7	Gm27216	Annotated_lncRNA	ENSMUST00000119612	ENSMUSG00000025903	Lypla1	Alpha/Beta hydrolase fold||Phospholipase/carboxylesterase/thioesterase	0.975295	7.61733e-06
ENSMUST00000184605.7	ENSMUSG00000098747.7	Gm27216	Annotated_lncRNA	ENSMUST00000127380	ENSMUSG00000079334	Nat6	Acyl-CoA N-acyltransferase||GNAT domain	0.979905	3.71399e-06
ENSMUST00000184605.7	ENSMUSG00000098747.7	Gm27216	Annotated_lncRNA	ENSMUST00000131070	ENSMUSG00000056999	Ide	Metalloenzyme, LuxS/M16 peptidase-like||Peptidase M16, C-terminal||Peptidase M16, zinc-binding site||Peptidase M16, N-terminal	0.958644	4.54799e-05
ENSMUST00000184605.7	ENSMUSG00000098747.7	Gm27216	Annotated_lncRNA	ENSMUST00000079691	ENSMUSG00000027610	Gss	Glutathione synthase, eukaryotic||Glutathione synthase, substrate-binding, eukaryotic||Pre-ATP-grasp domain	0.964676	2.63496e-05
ENSMUST00000184605.7	ENSMUSG00000098747.7	Gm27216	Annotated_lncRNA	ENSMUST00000031051	ENSMUSG00000029161	Cgref1	EF-Hand 1, calcium-binding site||EF-hand domain||EF-hand domain pair	0.97016	1.46784e-05
ENSMUST00000184605.7	ENSMUSG00000098747.7	Gm27216	Annotated_lncRNA	ENSMUST00000064873	ENSMUSG00000035031	C8a	Membrane attack complex component/perforin (MACPF) domain||Low-density lipoprotein (LDL) receptor class A, conserved site||Membrane attack complex component/perforin/complement C9||Thrombospondin type-1 (TSP1) repeat||Membrane attack complex component/perforin domain, conserved site||Low-density lipoprotein (LDL) receptor class A repeat	0.953177	6.98549e-05
ENSMUST00000184605.7	ENSMUSG00000098747.7	Gm27216	Annotated_lncRNA	ENSMUST00000022296	ENSMUSG00000021774	Ube2e1	Ubiquitin-conjugating enzyme, active site||Ubiquitin-conjugating enzyme E2||Ubiquitin-conjugating enzyme/RWD-like	0.976416	6.4818e-06
ENSMUST00000184605.7	ENSMUSG00000098747.7	Gm27216	Annotated_lncRNA	ENSMUST00000109916	ENSMUSG00000068130	Zfp442	Zinc finger, C2H2||Krueppel-associated box||Zinc finger, C2H2-like	0.973252	1.00392e-05
ENSMUST00000184605.7	ENSMUSG00000098747.7	Gm27216	Annotated_lncRNA	ENSMUST00000131475	ENSMUSG00000002797	Ggct	Butirosin biosynthesis, BtrG-like||-	0.962765	3.16264e-05
ENSMUST00000184605.7	ENSMUSG00000098747.7	Gm27216	Annotated_lncRNA	ENSMUST00000167085	ENSMUSG00000038305	Spats2l	UBA-like||Protein of unknown function DUF1387	0.950829	8.27104e-05
ENSMUST00000184605.7	ENSMUSG00000098747.7	Gm27216	Annotated_lncRNA	ENSMUST00000102772	ENSMUSG00000020377	Ltc4s	-||5-lipoxygenase-activating protein||FLAP/GST2/LTC4S, conserved site||Membrane-associated, eicosanoid/glutathione metabolism (MAPEG) protein	-0.952848	7.15639e-05
ENSMUST00000184605.7	ENSMUSG00000098747.7	Gm27216	Annotated_lncRNA	ENSMUST00000071728	ENSMUSG00000029822	Osbpl3	-||Oxysterol-binding protein, conserved site||Pleckstrin homology domain||Oxysterol-binding protein	0.958592	4.568e-05
ENSMUST00000184605.7	ENSMUSG00000098747.7	Gm27216	Annotated_lncRNA	ENSMUST00000105701	ENSMUSG00000028979	Masp2	Sushi/SCR/CCP domain||Peptidase S1A, chymotrypsin-type||Peptidase S1, PA clan||EGF-like, conserved site||Peptidase S1, trypsin family, active site||Peptidase S1A, complement C1r/C1S/mannan-binding||CUB domain||EGF-like domain||EGF-like calcium-binding, conserved site||EGF-like calcium-binding domain||Serine proteases, trypsin domain||EGF-type aspartate/asparagine hydroxylation site	0.954895	6.13949e-05
ENSMUST00000184605.7	ENSMUSG00000098747.7	Gm27216	Annotated_lncRNA	ENSMUST00000040218	ENSMUSG00000038206	Fbxo8	Sec7 domain||F-box domain	0.952897	7.13073e-05
ENSMUST00000184605.7	ENSMUSG00000098747.7	Gm27216	Annotated_lncRNA	ENSMUST00000165605	ENSMUSG00000038515	Grtp1	Rab-GTPase-TBC domain	0.954806	6.18138e-05
ENSMUST00000184605.7	ENSMUSG00000098747.7	Gm27216	Annotated_lncRNA	ENSMUST00000001963	ENSMUSG00000020681	Ace	Peptidase M2, peptidyl-dipeptidase A	0.961003	3.71177e-05
ENSMUST00000184605.7	ENSMUSG00000098747.7	Gm27216	Annotated_lncRNA	ENSMUST00000166161	ENSMUSG00000064179	Tnnt1	-||Troponin	0.971141	1.30693e-05
ENSMUST00000184605.7	ENSMUSG00000098747.7	Gm27216	Annotated_lncRNA	ENSMUST00000032441	ENSMUSG00000030301	Ccdc91	-	0.983011	2.06999e-06
ENSMUST00000184605.7	ENSMUSG00000098747.7	Gm27216	Annotated_lncRNA	ENSMUST00000034267	ENSMUSG00000031808	Slc27a1	AMP-binding enzyme C-terminal domain||AMP-binding, conserved site||AMP-dependent synthetase/ligase	-0.976779	6.1418e-06
ENSMUST00000184605.7	ENSMUSG00000098747.7	Gm27216	Annotated_lncRNA	ENSMUST00000067929	ENSMUSG00000030759	Far1	Fatty acyl-CoA reductase||Male sterility, NAD-binding	0.95129	8.00688e-05
ENSMUST00000184605.7	ENSMUSG00000098747.7	Gm27216	Annotated_lncRNA	ENSMUST00000121992	ENSMUSG00000031549	Ido2	Indoleamine 2,3-dioxygenase	0.963918	2.83602e-05
ENSMUST00000184605.7	ENSMUSG00000098747.7	Gm27216	Annotated_lncRNA	ENSMUST00000034547	ENSMUSG00000032047	Acat1	Thiolase, conserved site||Thiolase||Thiolase-like||Thiolase, C-terminal||Thiolase, active site||Thiolase, acyl-enzyme intermediate active site||Thiolase, N-terminal	0.977254	5.71545e-06
ENSMUST00000184605.7	ENSMUSG00000098747.7	Gm27216	Annotated_lncRNA	ENSMUST00000029804	ENSMUSG00000005813	Metap1	Peptidase M24A, methionine aminopeptidase, subfamily 1||Peptidase M24, structural domain||Peptidase M24, methionine aminopeptidase||Zinc finger, MYND-type	0.972992	1.03828e-05
ENSMUST00000184605.7	ENSMUSG00000098747.7	Gm27216	Annotated_lncRNA	ENSMUST00000110064	ENSMUSG00000068205	Macrod2	Macro domain||-	0.969754	1.53822e-05
ENSMUST00000184605.7	ENSMUSG00000098747.7	Gm27216	Annotated_lncRNA	ENSMUST00000044138	ENSMUSG00000037347	Chst7	Sulfotransferase domain||Carbohydrate sulfotransferase||P-loop containing nucleoside triphosphate hydrolase	0.966641	2.16078e-05
ENSMUST00000184605.7	ENSMUSG00000098747.7	Gm27216	Annotated_lncRNA	ENSMUST00000120522	ENSMUSG00000053303	Slc22a26	Major facilitator superfamily domain||Major facilitator, sugar transporter-like	0.971439	1.26068e-05
ENSMUST00000184605.7	ENSMUSG00000098747.7	Gm27216	Annotated_lncRNA	ENSMUST00000030914	ENSMUSG00000029048	Rer1	Retrieval of early ER protein Rer1	0.978983	4.34121e-06
ENSMUST00000184605.7	ENSMUSG00000098747.7	Gm27216	Annotated_lncRNA	ENSMUST00000070004	ENSMUSG00000031958	Ldhd	FAD linked oxidase, N-terminal||FAD-linked oxidase-like, C-terminal||FAD-binding, type 2||FAD-linked oxidase, C-terminal	0.971595	1.23701e-05
ENSMUST00000184605.7	ENSMUSG00000098747.7	Gm27216	Annotated_lncRNA	ENSMUST00000174143	ENSMUSG00000079495	Gm11128	GNAT domain||Acyl-CoA N-acyltransferase	0.961255	3.62925e-05
ENSMUST00000184605.7	ENSMUSG00000098747.7	Gm27216	Annotated_lncRNA	ENSMUST00000106696	ENSMUSG00000020604	Arsg	Alkaline-phosphatase-like, core domain||Sulfatase||Sulfatase, conserved site	0.970616	1.39145e-05
ENSMUST00000184605.7	ENSMUSG00000098747.7	Gm27216	Annotated_lncRNA	ENSMUST00000034945	ENSMUSG00000032381	Fam96a	Domain of unknown function DUF59	0.955944	5.65983e-05
ENSMUST00000184605.7	ENSMUSG00000098747.7	Gm27216	Annotated_lncRNA	ENSMUST00000107359	ENSMUSG00000039270	Megf9	Laminin EGF domain||EGF-like domain	-0.967975	1.87563e-05
ENSMUST00000184605.7	ENSMUSG00000098747.7	Gm27216	Annotated_lncRNA	ENSMUST00000097672	ENSMUSG00000073633	Fbxo36	F-box domain	0.962853	3.13665e-05
ENSMUST00000184605.7	ENSMUSG00000098747.7	Gm27216	Annotated_lncRNA	ENSMUST00000035007	ENSMUSG00000032434	Cmtm6	Marvel domain	0.958287	4.68523e-05
ENSMUST00000184605.7	ENSMUSG00000098747.7	Gm27216	Annotated_lncRNA	ENSMUST00000002274	ENSMUSG00000002204	Napsa	Aspartic peptidase, active site||Aspartic peptidase||Aspartic peptidase domain	0.954456	6.34843e-05
ENSMUST00000184605.7	ENSMUSG00000098747.7	Gm27216	Annotated_lncRNA	ENSMUST00000020022	ENSMUSG00000019872	Smpdl3a	Metallo-dependent phosphatase-like||Acid sphingomyelinase-like phosphodiesterase, predicted||Calcineurin-like phosphoesterase domain, apaH type	0.972515	1.10337e-05
ENSMUST00000184605.7	ENSMUSG00000098747.7	Gm27216	Annotated_lncRNA	ENSMUST00000015645	ENSMUSG00000015501	Hivep2	Zinc finger, C2H2-like||Zinc finger, C2H2	-0.963139	3.05387e-05
ENSMUST00000184605.7	ENSMUSG00000098747.7	Gm27216	Annotated_lncRNA	ENSMUST00000022380	ENSMUSG00000021832	Psmc6	26S proteasome subunit P45||ATPase, AAA-type, core||AAA+ ATPase domain||P-loop containing nucleoside triphosphate hydrolase||ATPase, AAA-type, conserved site	0.950012	8.75517e-05
ENSMUST00000184605.7	ENSMUSG00000098747.7	Gm27216	Annotated_lncRNA	ENSMUST00000028855	ENSMUSG00000027376	Prom2	Prominin	-0.976336	6.55826e-06
ENSMUST00000184605.7	ENSMUSG00000098747.7	Gm27216	Annotated_lncRNA	ENSMUST00000117597	ENSMUSG00000001786	Fbxo7	-||F-box domain||PI31 proteasome regulator, N-terminal||Ubiquitin-related domain	0.975829	7.05971e-06
ENSMUST00000184605.7	ENSMUSG00000098747.7	Gm27216	Annotated_lncRNA	ENSMUST00000090302	ENSMUSG00000040640	Erc2	Active zone protein ELKS	0.97877	4.49669e-06
ENSMUST00000184605.7	ENSMUSG00000098747.7	Gm27216	Annotated_lncRNA	ENSMUST00000049948	ENSMUSG00000024654	Asrgl1	Nucleophile aminohydrolases, N-terminal||Peptidase T2, asparaginase 2	-0.958315	4.6744e-05
ENSMUST00000184605.7	ENSMUSG00000098747.7	Gm27216	Annotated_lncRNA	ENSMUST00000066439	ENSMUSG00000053799	Exoc6	Exocyst complex subunit Sec15-like	0.96305	3.07957e-05
ENSMUST00000184605.7	ENSMUSG00000098747.7	Gm27216	Annotated_lncRNA	ENSMUST00000111122	ENSMUSG00000020594	Pum2	Pumilio RNA-binding repeat||Armadillo-type fold||-	0.964528	2.67343e-05
ENSMUST00000184605.7	ENSMUSG00000098747.7	Gm27216	Annotated_lncRNA	ENSMUST00000013559	ENSMUSG00000013415	Igf2bp1	RNA recognition motif domain||K Homology domain, type 1||K Homology domain	0.954366	6.39171e-05
ENSMUST00000184605.7	ENSMUSG00000098747.7	Gm27216	Annotated_lncRNA	ENSMUST00000182097	ENSMUSG00000025027	Xpnpep1	Creatinase/Aminopeptidase P, N-terminal||-||Creatinase, N-terminal||Peptidase M24B, X-Pro dipeptidase/aminopeptidase P, conserved site||Peptidase M24, structural domain	0.950802	8.28717e-05
ENSMUST00000184605.7	ENSMUSG00000098747.7	Gm27216	Annotated_lncRNA	ENSMUST00000162735	ENSMUSG00000021187	Tc2n	C2 domain	0.971242	1.29119e-05
ENSMUST00000184605.7	ENSMUSG00000098747.7	Gm27216	Annotated_lncRNA	ENSMUST00000171765	ENSMUSG00000024386	Proc	EGF-like domain||EGF-like calcium-binding, conserved site||EGF-like calcium-binding domain||EGF-type aspartate/asparagine hydroxylation site||Serine proteases, trypsin domain||EGF-like, conserved site||Peptidase S1, trypsin family, active site||Gamma-carboxyglutamic acid-rich (GLA) domain||Peptidase S1A, chymotrypsin-type||Peptidase S1, PA clan||Peptidase S1A, coagulation factor VII/IX/X/C/Z	0.995321	2.29709e-08
ENSMUST00000184605.7	ENSMUSG00000098747.7	Gm27216	Annotated_lncRNA	ENSMUST00000022791	ENSMUSG00000022184	Fbxo4	F-box domain	0.961673	3.49544e-05
ENSMUST00000184605.7	ENSMUSG00000098747.7	Gm27216	Annotated_lncRNA	ENSMUST00000126142	ENSMUSG00000061742	Slc22a12	Major facilitator superfamily domain||Major facilitator, sugar transporter-like	0.963359	2.99114e-05
ENSMUST00000184605.7	ENSMUSG00000098747.7	Gm27216	Annotated_lncRNA	ENSMUST00000006785	ENSMUSG00000021335	Slc17a1	-||Major facilitator superfamily||Major facilitator superfamily domain||Na-dependent inorganic phosphate cotransporter	0.980993	3.05984e-06
ENSMUST00000184605.7	ENSMUSG00000098747.7	Gm27216	Annotated_lncRNA	ENSMUST00000018246	ENSMUSG00000018102	Hist1h2bc	Histone H2A/H2B/H3||Histone-fold||Histone H2B	0.953548	6.79638e-05
ENSMUST00000184605.7	ENSMUSG00000098747.7	Gm27216	Annotated_lncRNA	ENSMUST00000029419	ENSMUSG00000027831	Veph1	Pleckstrin homology domain||Armadillo-type fold	0.951913	7.6588e-05
ENSMUST00000184605.7	ENSMUSG00000098747.7	Gm27216	Annotated_lncRNA	ENSMUST00000090601	ENSMUSG00000000416	Cttnbp2	Ankyrin repeat-containing domain||Cortactin-binding protein-2, N-terminal||-||Ankyrin repeat	-0.958287	4.68535e-05
ENSMUST00000184605.7	ENSMUSG00000098747.7	Gm27216	Annotated_lncRNA	ENSMUST00000038942	ENSMUSG00000042613	Pbxip1	-	-0.951259	8.0244e-05
ENSMUST00000184605.7	ENSMUSG00000098747.7	Gm27216	Annotated_lncRNA	ENSMUST00000034203	ENSMUSG00000031753	Cog4	Conserved oligomeric Golgi complex, subunit 4||-	0.969651	1.5565e-05
ENSMUST00000184605.7	ENSMUSG00000098747.7	Gm27216	Annotated_lncRNA	ENSMUST00000115443	ENSMUSG00000009376	Met	Protein kinase-like domain||-||Plexin repeat||Protein kinase, ATP binding site||Sema domain||Plexin-like fold||IPT domain||Immunoglobulin E-set||Tyrosine-protein kinase, HGF/MSP receptor||Tyrosine-protein kinase, catalytic domain||Serine-threonine/tyrosine-protein kinase catalytic domain||Tyrosine-protein kinase, active site||Protein kinase domain	0.973298	9.97979e-06
ENSMUST00000184605.7	ENSMUSG00000098747.7	Gm27216	Annotated_lncRNA	ENSMUST00000123930	ENSMUSG00000030268	Bcat1	Aminotransferase class IV||Aminotransferase, class IV, conserved site||Branched-chain amino acid aminotransferase II	0.970385	1.42977e-05
ENSMUST00000184605.7	ENSMUSG00000098747.7	Gm27216	Annotated_lncRNA	ENSMUST00000165232	ENSMUSG00000002944	Cd36	Adhesion molecule CD36||CD36 antigen	0.952012	7.60424e-05
ENSMUST00000184605.7	ENSMUSG00000098747.7	Gm27216	Annotated_lncRNA	ENSMUST00000019068	ENSMUSG00000018924	Alox15	Lipoxygenase, conserved site||Lipoxygenase, iron binding site||Lipoxygenase, C-terminal||PLAT/LH2 domain||Lipoxygenase, mammalian	0.96299	3.09675e-05
ENSMUST00000184605.7	ENSMUSG00000098747.7	Gm27216	Annotated_lncRNA	ENSMUST00000019932	ENSMUSG00000019797	1700021F05Rik	-	0.957226	5.11035e-05
ENSMUST00000184605.7	ENSMUSG00000098747.7	Gm27216	Annotated_lncRNA	ENSMUST00000036161	ENSMUSG00000041720	Pi4ka	Phosphatidylinositol 3-/4-kinase, catalytic domain||Phosphoinositide 3-kinase, accessory (PIK) domain||Phosphatidylinositol 3/4-kinase, conserved site||Armadillo-type fold||-||Protein kinase-like domain	0.972466	1.11023e-05
ENSMUST00000184605.7	ENSMUSG00000098747.7	Gm27216	Annotated_lncRNA	ENSMUST00000100827	ENSMUSG00000030249	Abcc9	ABC transporter, conserved site||AAA+ ATPase domain||Sulphonylurea receptor||P-loop containing nucleoside triphosphate hydrolase||ABC transporter-like||ABC transporter type 1, transmembrane domain||ATP-binding cassette subfamily C member 9	0.953165	6.99177e-05
ENSMUST00000184605.7	ENSMUSG00000098747.7	Gm27216	Annotated_lncRNA	ENSMUST00000066091	ENSMUSG00000031681	Smad1	SMAD domain, Dwarfin-type||SMAD/FHA domain||MAD homology, MH1||MAD homology 1, Dwarfin-type	-0.954534	6.31067e-05
ENSMUST00000184605.7	ENSMUSG00000098747.7	Gm27216	Annotated_lncRNA	ENSMUST00000058692	ENSMUSG00000032006	Pdgfd	PDGF/VEGF domain||CUB domain||Cystine-knot cytokine	0.972736	1.07278e-05
ENSMUST00000184605.7	ENSMUSG00000098747.7	Gm27216	Annotated_lncRNA	ENSMUST00000034140	ENSMUSG00000031703	Itfg1	-	0.970539	1.40413e-05
ENSMUST00000184605.7	ENSMUSG00000098747.7	Gm27216	Annotated_lncRNA	ENSMUST00000118717	ENSMUSG00000033715	Akr1c14	Aldo/keto reductase, conserved site||NADP-dependent oxidoreductase domain||Aldo/keto reductase subgroup	0.984434	1.52604e-06
ENSMUST00000184605.7	ENSMUSG00000098747.7	Gm27216	Annotated_lncRNA	ENSMUST00000103067	ENSMUSG00000018363	Smurf2	WW domain||C2 domain||E3 ubiquitin-protein ligase, SMURF1 type||HECT domain	0.956146	5.57066e-05
ENSMUST00000184605.7	ENSMUSG00000098747.7	Gm27216	Annotated_lncRNA	ENSMUST00000103061	ENSMUSG00000020610	Amz2	Peptidase M54, archaemetzincin	0.96784	1.90315e-05
ENSMUST00000184605.7	ENSMUSG00000098747.7	Gm27216	Annotated_lncRNA	ENSMUST00000191670	ENSMUSG00000027531	Impa1	Inositol monophosphatase, Lithium-sensitive||Inositol monophosphatase||Inositol monophosphatase, metal-binding site||Inositol monophosphatase, conserved site	0.960646	3.83051e-05
ENSMUST00000184605.7	ENSMUSG00000098747.7	Gm27216	Annotated_lncRNA	ENSMUST00000001253	ENSMUSG00000020651	Slc26a4	Sulphate anion transporter, conserved site||STAS domain||SLC26A/SulP transporter domain||SLC26A/SulP transporter	-0.964166	2.76915e-05
ENSMUST00000184605.7	ENSMUSG00000098747.7	Gm27216	Annotated_lncRNA	ENSMUST00000044106	ENSMUSG00000039067	Psmd7	JAB1/MPN/MOV34 metalloenzyme domain||Rpn11/EIF3F, C-terminal	0.984026	1.67004e-06
ENSMUST00000184605.7	ENSMUSG00000098747.7	Gm27216	Annotated_lncRNA	ENSMUST00000109679	ENSMUSG00000021612	Slc6a18	Sodium:neurotransmitter symporter||Sodium:neurotransmitter symporter, orphan	0.955142	6.02395e-05
ENSMUST00000184605.7	ENSMUSG00000098747.7	Gm27216	Annotated_lncRNA	ENSMUST00000199531	ENSMUSG00000037062	Sh3glb1	SH3 domain||BAR domain	0.953818	6.66075e-05
ENSMUST00000184605.7	ENSMUSG00000098747.7	Gm27216	Annotated_lncRNA	ENSMUST00000030986	ENSMUSG00000029103	Lrpap1	Alpha-2-macroglobulin RAP, C-terminal||Alpha-2-macroglobulin receptor-associated protein, domain 1	0.985175	1.28735e-06
ENSMUST00000184605.7	ENSMUSG00000098747.7	Gm27216	Annotated_lncRNA	ENSMUST00000048519	ENSMUSG00000020590	Snx13	PX-associated, sorting nexin 13||Phox-associated domain||Sorting nexin, C-terminal||RGS domain||Phox homologous domain	0.951559	7.85506e-05
ENSMUST00000184605.7	ENSMUSG00000098747.7	Gm27216	Annotated_lncRNA	ENSMUST00000030269	ENSMUSG00000028542	Slc6a9	Sodium:neurotransmitter symporter||Sodium:neurotransmitter symporter, glycine, type 1||-	0.957982	4.80494e-05
ENSMUST00000184605.7	ENSMUSG00000098747.7	Gm27216	Annotated_lncRNA	ENSMUST00000063770	ENSMUSG00000030935	Acsm3	AMP-binding enzyme C-terminal domain||AMP-binding, conserved site||AMP-dependent synthetase/ligase	0.953818	6.66066e-05
ENSMUST00000184605.7	ENSMUSG00000098747.7	Gm27216	Annotated_lncRNA	ENSMUST00000030305	ENSMUSG00000028571	Cyp2j13	Cytochrome P450, E-class, group I, CYP2J-like||Cytochrome P450||Cytochrome P450, conserved site||Cytochrome P450, E-class, group I	0.97677	6.14953e-06
ENSMUST00000184605.7	ENSMUSG00000098747.7	Gm27216	Annotated_lncRNA	ENSMUST00000032413	ENSMUSG00000030275	Etnk1	Protein kinase-like domain	-0.992509	1.18918e-07
ENSMUST00000184605.7	ENSMUSG00000098747.7	Gm27216	Annotated_lncRNA	ENSMUST00000119430	ENSMUSG00000021770	Samd8	-||Sphingomyelin synthase-like domain||Sterile alpha motif/pointed domain||Sterile alpha motif domain	0.951807	7.71706e-05
ENSMUST00000184605.7	ENSMUSG00000098747.7	Gm27216	Annotated_lncRNA	ENSMUST00000035045	ENSMUSG00000032470	Mras	Small GTPase superfamily, Rab type||Small GTPase superfamily, Ras type||Small GTPase superfamily, Rho type||P-loop containing nucleoside triphosphate hydrolase||Small GTP-binding protein domain||Small GTPase superfamily||Ran GTPase	-0.959886	4.0928e-05
ENSMUST00000184605.7	ENSMUSG00000098747.7	Gm27216	Annotated_lncRNA	ENSMUST00000176030	ENSMUSG00000024921	Smarca2	Bromodomain||Glutamine-Leucine-Glutamine, QLQ||Bromodomain, conserved site||Helicase, C-terminal||Snf2 ATP coupling domain||P-loop containing nucleoside triphosphate hydrolase||Helicase superfamily 1/2, ATP-binding domain||Helicase/SANT-associated domain||BRK domain||SNF2-related, N-terminal domain||-	0.96415	2.77335e-05
ENSMUST00000184605.7	ENSMUSG00000098747.7	Gm27216	Annotated_lncRNA	ENSMUST00000015171	ENSMUSG00000015027	Galns	Sulfatase||Sulfatase, conserved site||Alkaline-phosphatase-like, core domain	0.974992	7.94676e-06
ENSMUST00000184605.7	ENSMUSG00000098747.7	Gm27216	Annotated_lncRNA	ENSMUST00000028807	ENSMUSG00000027332	Ivd	Acyl-CoA oxidase/dehydrogenase, central domain||Acyl-CoA dehydrogenase/oxidase C-terminal||Acyl-CoA dehydrogenase/oxidase, N-terminal||Acyl-CoA dehydrogenase, conserved site||Acyl-CoA dehydrogenase/oxidase, N-terminal and middle domain	0.96549	2.43049e-05
ENSMUST00000184605.7	ENSMUSG00000098747.7	Gm27216	Annotated_lncRNA	ENSMUST00000178826	ENSMUSG00000028124	Gclm	-||NADP-dependent oxidoreductase domain	0.969253	1.62857e-05
ENSMUST00000184605.7	ENSMUSG00000098747.7	Gm27216	Annotated_lncRNA	ENSMUST00000159584	ENSMUSG00000090061	Nwd2	-||P-loop containing nucleoside triphosphate hydrolase||WD40 repeat||Quinonprotein alcohol dehydrogenase-like superfamily||WD40 repeat, conserved site||WD40-repeat-containing domain	0.957949	4.81815e-05
ENSMUST00000184605.7	ENSMUSG00000098747.7	Gm27216	Annotated_lncRNA	ENSMUST00000051558	ENSMUSG00000041235	Chd7	Helicase, C-terminal||P-loop containing nucleoside triphosphate hydrolase||Chromo domain||Chromo/chromo shadow domain||SNF2-related, N-terminal domain||-||BRK domain||Chromo domain-like||Helicase superfamily 1/2, ATP-binding domain	-0.969977	1.49924e-05
ENSMUST00000184605.7	ENSMUSG00000098747.7	Gm27216	Annotated_lncRNA	ENSMUST00000030164	ENSMUSG00000028452	Vcp	P-loop containing nucleoside triphosphate hydrolase||CDC48, domain 2||AAA+ ATPase domain||ATPase, AAA-type, core||Vps4 oligomerisation, C-terminal||ATPase, AAA-type, conserved site||CDC48, N-terminal subdomain||Aspartate decarboxylase-like domain||CDC48 domain 2-like||AAA ATPase, CDC48 family	0.956773	5.30025e-05
ENSMUST00000184605.7	ENSMUSG00000098747.7	Gm27216	Annotated_lncRNA	ENSMUST00000197574	ENSMUSG00000002944	Cd36	Adhesion molecule CD36||CD36 antigen	0.954701	6.23108e-05
ENSMUST00000184605.7	ENSMUSG00000098747.7	Gm27216	Annotated_lncRNA	ENSMUST00000115628	ENSMUSG00000013539	Tango2	-||Transport and Golgi organisation protein 2	0.986231	9.95201e-07
ENSMUST00000184605.7	ENSMUSG00000098747.7	Gm27216	Annotated_lncRNA	ENSMUST00000117506	ENSMUSG00000059890	Ube4a	U box domain||-||Ubiquitin conjugation factor E4, core	0.965574	2.40993e-05
ENSMUST00000184605.7	ENSMUSG00000098747.7	Gm27216	Annotated_lncRNA	ENSMUST00000022806	ENSMUSG00000089682	Bcl2l2	Apoptosis regulator, Bcl-2, BH4 motif, conserved site||Apoptosis regulator, Bcl-2 protein, BH4||Apoptosis regulator, Bcl-2, BH1 motif, conserved site||Blc2 family||Bcl2-like||Apoptosis regulator, Bcl-2, BH2 motif, conserved site||Apoptosis regulator, Bcl-W	0.963994	2.81544e-05
ENSMUST00000184605.7	ENSMUSG00000098747.7	Gm27216	Annotated_lncRNA	ENSMUST00000047232	ENSMUSG00000042410	Agps	FAD-linked oxidase, C-terminal||FAD-linked oxidase-like, C-terminal||-||FAD linked oxidase, N-terminal||FAD-binding, type 2	0.967074	2.06503e-05
ENSMUST00000184605.7	ENSMUSG00000098747.7	Gm27216	Annotated_lncRNA	ENSMUST00000038574	ENSMUSG00000042426	Dhx29	Helicase-associated domain||Helicase, C-terminal||P-loop containing nucleoside triphosphate hydrolase||Domain of unknown function DUF1605||DNA/RNA helicase, ATP-dependent, DEAH-box type, conserved site||DEAD/DEAH box helicase domain||Helicase superfamily 1/2, ATP-binding domain	0.966785	2.12871e-05
ENSMUST00000184605.7	ENSMUSG00000098747.7	Gm27216	Annotated_lncRNA	ENSMUST00000166381	ENSMUSG00000090546	Cdr1	-	0.968349	1.8007e-05
ENSMUST00000184605.7	ENSMUSG00000098747.7	Gm27216	Annotated_lncRNA	ENSMUST00000079644	ENSMUSG00000028639	Ybx1	Cold shock protein||Cold-shock conserved site||Cold-shock protein, DNA-binding||Nucleic acid-binding, OB-fold||-	0.958584	4.57093e-05
ENSMUST00000184605.7	ENSMUSG00000098747.7	Gm27216	Annotated_lncRNA	ENSMUST00000098371	ENSMUSG00000025790	Slco3a1	Major facilitator superfamily domain||Organic anion transporter polypeptide OATP||Kazal domain	0.964563	2.66424e-05
ENSMUST00000184605.7	ENSMUSG00000098747.7	Gm27216	Annotated_lncRNA	ENSMUST00000042251	ENSMUSG00000019763	Rmnd1	-||Protein of unknown function DUF155	0.960621	3.83909e-05
ENSMUST00000184605.7	ENSMUSG00000098747.7	Gm27216	Annotated_lncRNA	ENSMUST00000113451	ENSMUSG00000061742	Slc22a12	Major facilitator superfamily domain||Major facilitator, sugar transporter-like	0.966427	2.2093e-05
ENSMUST00000184605.7	ENSMUSG00000098747.7	Gm27216	Annotated_lncRNA	ENSMUST00000021425	ENSMUSG00000021037	Ahsa1	Activator of Hsp90 ATPase, N-terminal||Activator of Hsp90 ATPase homologue 1-like	0.975857	7.03195e-06
ENSMUST00000184605.7	ENSMUSG00000098747.7	Gm27216	Annotated_lncRNA	ENSMUST00000006027	ENSMUSG00000005873	Reep5	TB2/DP1/HVA22-related protein	0.978281	4.86671e-06
ENSMUST00000184605.7	ENSMUSG00000098747.7	Gm27216	Annotated_lncRNA	ENSMUST00000019333	ENSMUSG00000019189	Rnf145	Zinc finger, RING-CH-type||TRC8 N-terminal domain||Zinc finger, RING-type	0.963106	3.06341e-05
ENSMUST00000184605.7	ENSMUSG00000098747.7	Gm27216	Annotated_lncRNA	ENSMUST00000021940	ENSMUSG00000021484	Lman2	Concanavalin A-like lectin/glucanase domain||Legume-like lectin	0.959147	4.3595e-05
ENSMUST00000184605.7	ENSMUSG00000098747.7	Gm27216	Annotated_lncRNA	ENSMUST00000061242	ENSMUSG00000048076	Arf1	Small GTPase superfamily, SAR1-type||Small GTPase superfamily, ARF/SAR type||P-loop containing nucleoside triphosphate hydrolase||Small GTP-binding protein domain||Small GTPase superfamily, Rab type||Small GTPase superfamily, ARF type	0.95121	8.05189e-05
ENSMUST00000184605.7	ENSMUSG00000098747.7	Gm27216	Annotated_lncRNA	ENSMUST00000182042	ENSMUSG00000058690	Ccser2	-	0.953495	6.82307e-05
ENSMUST00000184605.7	ENSMUSG00000098747.7	Gm27216	Annotated_lncRNA	ENSMUST00000029516	ENSMUSG00000027908	Tchhl1	EF-hand domain||S100/CaBP-9k-type, calcium binding, subdomain	-0.956381	5.46821e-05
ENSMUST00000184605.7	ENSMUSG00000098747.7	Gm27216	Annotated_lncRNA	ENSMUST00000061937	ENSMUSG00000028189	Ctbs	Glycoside hydrolase family 18, catalytic domain||Glycoside hydrolase, chitinase active site||Glycoside hydrolase superfamily||-||Chitinase II	0.955269	5.96524e-05
ENSMUST00000184605.7	ENSMUSG00000098747.7	Gm27216	Annotated_lncRNA	ENSMUST00000023449	ENSMUSG00000022765	Snap29	SNAP-25||Target SNARE coiled-coil homology domain	0.966952	2.09168e-05
ENSMUST00000184605.7	ENSMUSG00000098747.7	Gm27216	Annotated_lncRNA	ENSMUST00000101029	ENSMUSG00000037679	Inf2	Formin, FH2 domain||Formin, FH3 domain||Rho GTPase-binding/formin homology 3 (GBD/FH3) domain||WH2 domain||Formin, GTPase-binding domain||Armadillo-type fold	-0.961717	3.48158e-05
ENSMUST00000184605.7	ENSMUSG00000098747.7	Gm27216	Annotated_lncRNA	ENSMUST00000186294	ENSMUSG00000056763	Cspp1	-	0.964019	2.80875e-05
ENSMUST00000184605.7	ENSMUSG00000098747.7	Gm27216	Annotated_lncRNA	ENSMUST00000046743	ENSMUSG00000033488	BC026585	Alcohol dehydrogenase, C-terminal||Polyketide synthase, enoylreductase domain||-||Alcohol dehydrogenase, N-terminal||GroES-like	0.956389	5.46469e-05
ENSMUST00000184605.7	ENSMUSG00000098747.7	Gm27216	Annotated_lncRNA	ENSMUST00000012331	ENSMUSG00000012187	Mogat1	Diacylglycerol acyltransferase	0.967027	2.07533e-05
ENSMUST00000184605.7	ENSMUSG00000098747.7	Gm27216	Annotated_lncRNA	ENSMUST00000042498	ENSMUSG00000034088	Hdlbp	K Homology domain||K Homology domain, type 1||-	0.98154	2.76383e-06
ENSMUST00000184605.7	ENSMUSG00000098747.7	Gm27216	Annotated_lncRNA	ENSMUST00000043551	ENSMUSG00000040351	Ankib1	Ubiquitin interacting motif||IBR domain||Zinc finger, RING-type||Ankyrin repeat-containing domain||Ankyrin repeat	0.976567	6.33905e-06
ENSMUST00000184605.7	ENSMUSG00000098747.7	Gm27216	Annotated_lncRNA	ENSMUST00000005003	ENSMUSG00000004880	Lbr	Ergosterol biosynthesis ERG4/ERG24||Sterol reductase, conserved site||Lamin-B receptor of TUDOR domain||Tudor domain	0.984858	1.38604e-06
ENSMUST00000184605.7	ENSMUSG00000098747.7	Gm27216	Annotated_lncRNA	ENSMUST00000078752	ENSMUSG00000060227	Casc4	GOLM1/CASC4 family||-	0.965932	2.32413e-05
ENSMUST00000184605.7	ENSMUSG00000098747.7	Gm27216	Annotated_lncRNA	ENSMUST00000046110	ENSMUSG00000026587	Astn1	Membrane attack complex component/perforin (MACPF) domain||EGF-like domain||-||Fibronectin type III	0.960393	3.91664e-05
ENSMUST00000184605.7	ENSMUSG00000098747.7	Gm27216	Annotated_lncRNA	ENSMUST00000029900	ENSMUSG00000028238	Atp6v0d2	ATPase, V0 complex, subunit d||ATPase, V0 complex, c/d subunit||-	-0.952385	7.40244e-05
ENSMUST00000184605.7	ENSMUSG00000098747.7	Gm27216	Annotated_lncRNA	ENSMUST00000105333	ENSMUSG00000059406	Tmprss9	Peptidase S1, trypsin family, active site||SEA domain||Low-density lipoprotein (LDL) receptor class A repeat||Peptidase S1A, chymotrypsin-type||Peptidase S1, PA clan||Serine proteases, trypsin domain||Transmembrane protease serine 9	0.952206	7.49896e-05
ENSMUST00000184605.7	ENSMUSG00000098747.7	Gm27216	Annotated_lncRNA	ENSMUST00000126322	ENSMUSG00000027610	Gss	Glutathione synthase, eukaryotic||Glutathione synthase, substrate-binding, eukaryotic||Pre-ATP-grasp domain	0.969611	1.56374e-05
ENSMUST00000184605.7	ENSMUSG00000098747.7	Gm27216	Annotated_lncRNA	ENSMUST00000023884	ENSMUSG00000023120	Gm853	Alanine racemase/group IV decarboxylase, C-terminal||Orn/DAP/Arg decarboxylase 2, C-terminal||Ornithine/DAP/Arg decarboxylase||Orn/DAP/Arg decarboxylase 2, conserved site||Orn/DAP/Arg decarboxylase 2, N-terminal||Orn/DAP/Arg decarboxylase 2, pyridoxal-phosphate binding site||PLP-binding barrel||Ornithine decarboxylase	0.96019	3.98627e-05
ENSMUST00000184605.7	ENSMUSG00000098747.7	Gm27216	Annotated_lncRNA	ENSMUST00000035495	ENSMUSG00000032815	Fanca	-||Fanconi anaemia group A protein	-0.97534	7.56923e-06
ENSMUST00000184605.7	ENSMUSG00000098747.7	Gm27216	Annotated_lncRNA	ENSMUST00000022281	ENSMUSG00000016018	Skiv2l2	ATP-dependent RNA helicase Ski2, C-terminal||Helicase superfamily 1/2, ATP-binding domain||DEAD/DEAH box helicase domain||rRNA-processing arch domain||ATP-dependent RNA helicase Ski2||P-loop containing nucleoside triphosphate hydrolase||Helicase, C-terminal	0.978815	4.463e-06
ENSMUST00000184605.7	ENSMUSG00000098747.7	Gm27216	Annotated_lncRNA	ENSMUST00000115227	ENSMUSG00000046598	Bdh1	Short-chain dehydrogenase/reductase, conserved site||Short-chain dehydrogenase/reductase SDR||Glucose/ribitol dehydrogenase	0.956993	5.20756e-05
ENSMUST00000184605.7	ENSMUSG00000098747.7	Gm27216	Annotated_lncRNA	ENSMUST00000107032	ENSMUSG00000032875	Arhgef17	Dbl homology (DH) domain||WD40-repeat-containing domain	-0.951037	8.15108e-05
ENSMUST00000184605.7	ENSMUSG00000098747.7	Gm27216	Annotated_lncRNA	ENSMUST00000078459	ENSMUSG00000058704	Memo1	MEMO1 family	0.981832	2.61449e-06
ENSMUST00000184605.7	ENSMUSG00000098747.7	Gm27216	Annotated_lncRNA	ENSMUST00000178003	ENSMUSG00000020744	Slc25a19	Mitochondrial substrate/solute carrier||-||Mitochondrial carrier protein	0.956215	5.54024e-05
ENSMUST00000184605.7	ENSMUSG00000098747.7	Gm27216	Annotated_lncRNA	ENSMUST00000065634	ENSMUSG00000053303	Slc22a26	Major facilitator superfamily domain||Major facilitator, sugar transporter-like	0.986125	1.02219e-06
ENSMUST00000184605.7	ENSMUSG00000098747.7	Gm27216	Annotated_lncRNA	ENSMUST00000086723	ENSMUSG00000024085	Man2a1	Glycoside hydrolase/deacetylase, beta/alpha-barrel||Glycoside hydrolase family 38, N-terminal domain||Glycoside hydrolase, family 38, central domain||Glycoside hydrolase, families 57/38, central domain||Galactose mutarotase-like domain||Glycosyl hydrolase family 38, C-terminal	-0.96604	2.29867e-05
ENSMUST00000184605.7	ENSMUSG00000098747.7	Gm27216	Annotated_lncRNA	ENSMUST00000101426	ENSMUSG00000023367	Tmem176a	CD20-like family||-	0.964863	2.58684e-05
ENSMUST00000184605.7	ENSMUSG00000098747.7	Gm27216	Annotated_lncRNA	ENSMUST00000029769	ENSMUSG00000028124	Gclm	-||NADP-dependent oxidoreductase domain	0.966364	2.22365e-05
ENSMUST00000184605.7	ENSMUSG00000098747.7	Gm27216	Annotated_lncRNA	ENSMUST00000112231	ENSMUSG00000048120	Entpd1	Nucleoside phosphatase GDA1/CD39	-0.957007	5.20176e-05
ENSMUST00000184605.7	ENSMUSG00000098747.7	Gm27216	Annotated_lncRNA	ENSMUST00000108246	ENSMUSG00000041058	Wwp1	WW domain||E3 ubiquitin-protein ligase, SMURF1 type||C2 domain||HECT domain	0.973562	9.64095e-06
ENSMUST00000184605.7	ENSMUSG00000098747.7	Gm27216	Annotated_lncRNA	ENSMUST00000088086	ENSMUSG00000006800	Sulf2	Sulfatase, conserved site||Sulfatase||Alkaline-phosphatase-like, core domain||Extracellular sulfatase, C-terminal||Extracellular sulfatase	-0.966504	2.19162e-05
ENSMUST00000184605.7	ENSMUSG00000098747.7	Gm27216	Annotated_lncRNA	ENSMUST00000001507	ENSMUSG00000001467	Cyp51	Cytochrome P450, E-class, group IV||Cytochrome P450, conserved site||Cytochrome P450	0.96449	2.68323e-05
ENSMUST00000184605.7	ENSMUSG00000098747.7	Gm27216	Annotated_lncRNA	ENSMUST00000069451	ENSMUSG00000055737	Ghr	Growth hormone/erythropoietin receptor, ligand binding||Growth hormone-binding protein||Fibronectin type III||Long hematopoietin receptor, single chain, conserved site	0.964372	2.71427e-05
ENSMUST00000184605.7	ENSMUSG00000098747.7	Gm27216	Annotated_lncRNA	ENSMUST00000044415	ENSMUSG00000039263	Npepl1	Leucine aminopeptidase/peptidase B||Peptidase M17, leucyl aminopeptidase, C-terminal	0.961013	3.70818e-05
ENSMUST00000184605.7	ENSMUSG00000098747.7	Gm27216	Annotated_lncRNA	ENSMUST00000045229	ENSMUSG00000038497	Tmco3	Cation/H+ exchanger	0.96568	2.38429e-05
ENSMUST00000184605.7	ENSMUSG00000098747.7	Gm27216	Annotated_lncRNA	ENSMUST00000098657	ENSMUSG00000074254	Cyp2a4	Cytochrome P450, E-class, group I||Cytochrome P450, E-class, group I, CYP2A-like||Cytochrome P450||Cytochrome P450, conserved site	0.98256	2.26769e-06
ENSMUST00000184605.7	ENSMUSG00000098747.7	Gm27216	Annotated_lncRNA	ENSMUST00000203168	ENSMUSG00000032758	Kap	Kidney androgen-regulated protein	0.977636	5.38886e-06
ENSMUST00000184605.7	ENSMUSG00000098747.7	Gm27216	Annotated_lncRNA	ENSMUST00000081790	ENSMUSG00000033417	Cacul1	Cullin, N-terminal||Cullin repeat-like-containing domain	0.956403	5.45863e-05
ENSMUST00000184605.7	ENSMUSG00000098747.7	Gm27216	Annotated_lncRNA	ENSMUST00000035390	ENSMUSG00000037053	Azgp1	-||MHC classes I/II-like antigen recognition protein||MHC class I alpha chain||Immunoglobulin-like domain||Immunoglobulin C1-set||MHC class I alpha chain, alpha1 alpha2 domains	0.980408	3.4001e-06
ENSMUST00000184605.7	ENSMUSG00000098747.7	Gm27216	Annotated_lncRNA	ENSMUST00000070150	ENSMUSG00000045071	E130308A19Rik	Protein of unknown function DUF3504	-0.957956	4.81521e-05
ENSMUST00000184605.7	ENSMUSG00000098747.7	Gm27216	Annotated_lncRNA	ENSMUST00000035371	ENSMUSG00000038486	Sv2a	Major facilitator superfamily||Synaptic vesicle protein SV2||Major facilitator superfamily domain||Pentapeptide repeat||Major facilitator, sugar transporter-like||Sugar transporter, conserved site	-0.978161	4.96156e-06
ENSMUST00000184605.7	ENSMUSG00000098747.7	Gm27216	Annotated_lncRNA	ENSMUST00000034878	ENSMUSG00000032328	Tmem30a	CDC50/LEM3 family	0.958555	4.58192e-05
ENSMUST00000184605.7	ENSMUSG00000098747.7	Gm27216	Annotated_lncRNA	ENSMUST00000134710	ENSMUSG00000039578	Ccser1	-	0.974994	7.94523e-06
ENSMUST00000184605.7	ENSMUSG00000098747.7	Gm27216	Annotated_lncRNA	ENSMUST00000021738	ENSMUSG00000021306	Gpr137b	-	0.964695	2.6301e-05
ENSMUST00000184605.7	ENSMUSG00000098747.7	Gm27216	Annotated_lncRNA	ENSMUST00000203229	ENSMUSG00000029810	Tmem176b	CD20-like family	0.967842	1.90289e-05
ENSMUST00000184605.7	ENSMUSG00000098747.7	Gm27216	Annotated_lncRNA	ENSMUST00000028389	ENSMUSG00000027004	Frzb	Frizzled domain||Netrin module, non-TIMP type||Netrin domain||Tissue inhibitor of metalloproteinases-like, OB-fold	0.975833	7.05628e-06
ENSMUST00000184605.7	ENSMUSG00000098747.7	Gm27216	Annotated_lncRNA	ENSMUST00000028841	ENSMUSG00000027363	Usp8	Ubiquitin specific protease, conserved site||Ubiquitin specific protease domain||USP8 dimerisation domain||Peptidase C19, ubiquitin carboxyl-terminal hydrolase||Rhodanese-like domain	0.952068	7.57366e-05
ENSMUST00000184605.7	ENSMUSG00000098747.7	Gm27216	Annotated_lncRNA	ENSMUST00000025546	ENSMUSG00000024644	Cndp2	Peptidase M20||Glutathione degradosome, DUG1||Peptidase M20, dimerisation domain||ArgE/DapE/ACY1/CPG2/YscS, conserved site	0.961871	3.43328e-05
ENSMUST00000184605.7	ENSMUSG00000098747.7	Gm27216	Annotated_lncRNA	ENSMUST00000171376	ENSMUSG00000015474	Ppt2	Palmitoyl protein thioesterase||Alpha/beta hydrolase fold-1||Alpha/Beta hydrolase fold	0.96265	3.19657e-05
ENSMUST00000184605.7	ENSMUSG00000098747.7	Gm27216	Annotated_lncRNA	ENSMUST00000054030	ENSMUSG00000024866	Acy3	Aspartoacylase||Succinylglutamate desuccinylase/aspartoacylase	0.981395	2.84014e-06
ENSMUST00000184605.7	ENSMUSG00000098747.7	Gm27216	Annotated_lncRNA	ENSMUST00000100167	ENSMUSG00000023088	Abcc1	ABC transporter type 1, transmembrane domain||-||ABC transporter-like||P-loop containing nucleoside triphosphate hydrolase||AAA+ ATPase domain||ABC transporter, conserved site||Multi drug resistance-associated protein	-0.969243	1.63042e-05
ENSMUST00000184605.7	ENSMUSG00000098747.7	Gm27216	Annotated_lncRNA	ENSMUST00000028944	ENSMUSG00000027452	Acss1	AMP-dependent synthetase/ligase||Acetate-CoA ligase||AMP-binding enzyme C-terminal domain||AMP-binding, conserved site	-0.97015	1.46957e-05
ENSMUST00000184605.7	ENSMUSG00000098747.7	Gm27216	Annotated_lncRNA	ENSMUST00000084647	ENSMUSG00000030945	Acsm2	AMP-dependent synthetase/ligase||AMP-binding enzyme C-terminal domain||AMP-binding, conserved site	0.973036	1.03244e-05
ENSMUST00000184605.7	ENSMUSG00000098747.7	Gm27216	Annotated_lncRNA	ENSMUST00000073782	ENSMUSG00000060336	Zfp937	Krueppel-associated box||Zinc finger, C2H2-like||Zinc finger, C2H2	0.972183	1.15025e-05
ENSMUST00000184605.7	ENSMUSG00000098747.7	Gm27216	Annotated_lncRNA	ENSMUST00000178605	ENSMUSG00000000420	Galnt1	Ricin B, lectin domain||Glycosyltransferase 2-like||Nucleotide-diphospho-sugar transferases||-	0.976601	6.30699e-06
ENSMUST00000184605.7	ENSMUSG00000098747.7	Gm27216	Annotated_lncRNA	ENSMUST00000110422	ENSMUSG00000036083	Slc17a3	Major facilitator superfamily||Major facilitator superfamily domain||Sodium-dependent phosphate transport protein 4 , predicted	0.990932	2.31738e-07
ENSMUST00000184605.7	ENSMUSG00000098747.7	Gm27216	Annotated_lncRNA	ENSMUST00000031093	ENSMUSG00000029193	Cckar	G protein-coupled receptor, rhodopsin-like||Cholecystokinin A receptor, N-terminal||GPCR, rhodopsin-like, 7TM||Cholecystokinin receptor type A||Cholecystokinin receptor||Gastrin receptor	0.976916	6.01644e-06
ENSMUST00000184605.7	ENSMUSG00000098747.7	Gm27216	Annotated_lncRNA	ENSMUST00000028949	ENSMUSG00000027455	Nsfl1c	UBA-like||UBX domain||SEP domain||Ubiquitin-related domain	0.973651	9.52925e-06
ENSMUST00000184605.7	ENSMUSG00000098747.7	Gm27216	Annotated_lncRNA	ENSMUST00000032888	ENSMUSG00000030654	Arl6ip1	Reticulon||-	0.972146	1.15569e-05
ENSMUST00000184605.7	ENSMUSG00000098747.7	Gm27216	Annotated_lncRNA	ENSMUST00000200335	ENSMUSG00000040351	Ankib1	Ubiquitin interacting motif||IBR domain||Zinc finger, RING-type||Ankyrin repeat-containing domain||Ankyrin repeat	0.965749	2.36783e-05
ENSMUST00000184605.7	ENSMUSG00000098747.7	Gm27216	Annotated_lncRNA	ENSMUST00000070877	ENSMUSG00000022244	Amacr	CoA-transferase family III||CoA-transferase family III domain	0.977644	5.382e-06
ENSMUST00000184605.7	ENSMUSG00000098747.7	Gm27216	Annotated_lncRNA	ENSMUST00000031251	ENSMUSG00000029311	Hsd17b11	Glucose/ribitol dehydrogenase||Short-chain dehydrogenase/reductase SDR	0.958801	4.48881e-05
ENSMUST00000184605.7	ENSMUSG00000098747.7	Gm27216	Annotated_lncRNA	ENSMUST00000087012	ENSMUSG00000067144	Slc22a7	Major facilitator superfamily domain||Organic cation transport protein||Major facilitator, sugar transporter-like	0.97164	1.23019e-05
ENSMUST00000184605.7	ENSMUSG00000098747.7	Gm27216	Annotated_lncRNA	ENSMUST00000168119	ENSMUSG00000041698	Slco1a1	Kazal domain||Organic anion transporter polypeptide OATP||Major facilitator superfamily domain	0.956196	5.5487e-05
ENSMUST00000184605.7	ENSMUSG00000098747.7	Gm27216	Annotated_lncRNA	ENSMUST00000111063	ENSMUSG00000016386	Mpped2	Calcineurin-like phosphoesterase||-||Calcineurin-like phosphoesterase domain, apaH type||Metallo-dependent phosphatase-like	0.971516	1.24902e-05
ENSMUST00000184605.7	ENSMUSG00000098747.7	Gm27216	Annotated_lncRNA	ENSMUST00000170051	ENSMUSG00000002944	Cd36	Adhesion molecule CD36||CD36 antigen	0.9528	7.18189e-05
ENSMUST00000184605.7	ENSMUSG00000098747.7	Gm27216	Annotated_lncRNA	ENSMUST00000111742	ENSMUSG00000030268	Bcat1	Aminotransferase class IV||Aminotransferase, class IV, conserved site||Branched-chain amino acid aminotransferase II	0.964754	2.61474e-05
ENSMUST00000184605.7	ENSMUSG00000098747.7	Gm27216	Annotated_lncRNA	ENSMUST00000043520	ENSMUSG00000038365	Fbxo25	F-box domain	0.958731	4.51498e-05
ENSMUST00000184605.7	ENSMUSG00000098747.7	Gm27216	Annotated_lncRNA	ENSMUST00000089677	ENSMUSG00000022811	Zfp148	Zinc finger, C2H2||Zinc finger, C2H2-like	0.97339	9.86082e-06
ENSMUST00000184605.7	ENSMUSG00000098747.7	Gm27216	Annotated_lncRNA	ENSMUST00000168841	ENSMUSG00000049103	Ccr2	CC chemokine receptor 2||G protein-coupled receptor, rhodopsin-like||Chemokine receptor family||GPCR, rhodopsin-like, 7TM	0.961406	3.58054e-05
ENSMUST00000184605.7	ENSMUSG00000098747.7	Gm27216	Annotated_lncRNA	ENSMUST00000171629	ENSMUSG00000045094	Arhgef37	Variant SH3 domain||BAR domain||SH3 domain||Dbl homology (DH) domain	-0.968661	1.73985e-05
ENSMUST00000184605.7	ENSMUSG00000098747.7	Gm27216	Annotated_lncRNA	ENSMUST00000000544	ENSMUSG00000000532	Acvr1b	Activin types I and II receptor domain||Protein kinase, ATP binding site||Serine/threonine/dual specificity protein kinase, catalytic domain||Protein kinase-like domain||Protein kinase domain||Serine/threonine-protein kinase, active site||GS domain	-0.959132	4.36501e-05
ENSMUST00000184605.7	ENSMUSG00000098747.7	Gm27216	Annotated_lncRNA	ENSMUST00000059515	ENSMUSG00000021218	Gdi2	Rab GDI protein||GDP dissociation inhibitor	0.986323	9.7211e-07
ENSMUST00000184605.7	ENSMUSG00000098747.7	Gm27216	Annotated_lncRNA	ENSMUST00000144177	ENSMUSG00000025911	Adhfe1	-||Alcohol dehydrogenase, iron-type	0.979432	4.02716e-06
ENSMUST00000184605.7	ENSMUSG00000098747.7	Gm27216	Annotated_lncRNA	ENSMUST00000067888	ENSMUSG00000029735	Tpk1	Thiamin pyrophosphokinase||Thiamin pyrophosphokinase, eukaryotic||Thiamin pyrophosphokinase, vitamin B1-binding domain||Thiamin pyrophosphokinase, catalytic domain	0.979487	3.98965e-06
ENSMUST00000184605.7	ENSMUSG00000098747.7	Gm27216	Annotated_lncRNA	ENSMUST00000132974	ENSMUSG00000031441	Atp11a	P-type ATPase, A domain||P-type ATPase, phosphorylation site||-||P-type ATPase, cytoplasmic domain N||P-type ATPase, subfamily IV||P-type ATPase||HAD-like domain	0.965867	2.33968e-05
ENSMUST00000184605.7	ENSMUSG00000098747.7	Gm27216	Annotated_lncRNA	ENSMUST00000026122	ENSMUSG00000025130	P4hb	Disulphide isomerase||Thioredoxin domain||Protein disulphide isomerase||Thioredoxin, conserved site||Thioredoxin-like fold	0.96269	3.18483e-05
ENSMUST00000184605.7	ENSMUSG00000098747.7	Gm27216	Annotated_lncRNA	ENSMUST00000026126	ENSMUSG00000025133	Ints4	Armadillo-type fold||-	0.962675	3.189e-05
ENSMUST00000184605.7	ENSMUSG00000098747.7	Gm27216	Annotated_lncRNA	ENSMUST00000031005	ENSMUSG00000029122	Evc	-	0.968626	1.74676e-05
ENSMUST00000184605.7	ENSMUSG00000098747.7	Gm27216	Annotated_lncRNA	ENSMUST00000027800	ENSMUSG00000026519	Tmem63a	-||Calcium-dependent channel, 7TM region, putative phosphate||10TM putative phosphate transporter, cytosolic domain	-0.952118	7.54635e-05
ENSMUST00000184605.7	ENSMUSG00000098747.7	Gm27216	Annotated_lncRNA	ENSMUST00000114466	ENSMUSG00000029822	Osbpl3	-||Oxysterol-binding protein, conserved site||Pleckstrin homology domain||Oxysterol-binding protein	0.968519	1.76738e-05
ENSMUST00000184605.7	ENSMUSG00000098747.7	Gm27216	Annotated_lncRNA	ENSMUST00000021063	ENSMUSG00000020720	Psmd12	Proteasome component (PCI) domain	0.956904	5.24463e-05
ENSMUST00000184605.7	ENSMUSG00000098747.7	Gm27216	Annotated_lncRNA	ENSMUST00000068813	ENSMUSG00000055312	Them7	Thioesterase superfamily||HotDog domain	0.969172	1.64348e-05
ENSMUST00000184605.7	ENSMUSG00000098747.7	Gm27216	Annotated_lncRNA	ENSMUST00000033818	ENSMUSG00000031441	Atp11a	P-type ATPase, A domain||P-type ATPase, phosphorylation site||-||P-type ATPase, cytoplasmic domain N||P-type ATPase, subfamily IV||P-type ATPase||HAD-like domain	0.962632	3.20174e-05
ENSMUST00000184605.7	ENSMUSG00000098747.7	Gm27216	Annotated_lncRNA	ENSMUST00000038719	ENSMUSG00000038736	Nudcd1	CS domain||HSP20-like chaperone	0.970435	1.42146e-05
ENSMUST00000184605.7	ENSMUSG00000098747.7	Gm27216	Annotated_lncRNA	ENSMUST00000023270	ENSMUSG00000022604	Cep97	IQ motif, EF-hand binding site||Leucine rich repeat 4||Leucine-rich repeat	0.970078	1.48186e-05
ENSMUST00000184605.7	ENSMUSG00000098747.7	Gm27216	Annotated_lncRNA	ENSMUST00000147153	ENSMUSG00000087303	Lipo2	Alpha/Beta hydrolase fold||Lipase, eukaryotic||Partial AB-hydrolase lipase domain||Alpha/beta hydrolase fold-1	0.950879	8.24211e-05
ENSMUST00000184605.7	ENSMUSG00000098747.7	Gm27216	Annotated_lncRNA	ENSMUST00000027650	ENSMUSG00000026399	Cd55	-||Sushi/SCR/CCP domain	0.956565	5.38896e-05
ENSMUST00000184605.7	ENSMUSG00000098747.7	Gm27216	Annotated_lncRNA	ENSMUST00000035929	ENSMUSG00000038704	Aspdh	L-aspartate dehydrogenase||-||Aspartate dehydrogenase||Aspartate/homoserine dehydrogenase, NAD-binding	0.961244	3.63273e-05
ENSMUST00000184605.7	ENSMUSG00000098747.7	Gm27216	Annotated_lncRNA	ENSMUST00000159109	ENSMUSG00000040524	Zfp609	-||Zinc finger, C2H2	-0.981779	2.64152e-06
ENSMUST00000184605.7	ENSMUSG00000098747.7	Gm27216	Annotated_lncRNA	ENSMUST00000146598	ENSMUSG00000027746	Ufm1	Ubiquitin-fold modifier 1||Ubiquitin-related domain	0.965995	2.30934e-05
ENSMUST00000184605.7	ENSMUSG00000098747.7	Gm27216	Annotated_lncRNA	ENSMUST00000060455	ENSMUSG00000023572	Ccndbp1	-	0.954949	6.11423e-05
ENSMUST00000184605.7	ENSMUSG00000098747.7	Gm27216	Annotated_lncRNA	ENSMUST00000046122	ENSMUSG00000039682	Lap3	Peptidase M17, leucyl aminopeptidase, C-terminal||Leucine aminopeptidase/peptidase B||-||Peptidase M17, leucyl aminopeptidase, N-terminal	0.97401	9.08459e-06
ENSMUST00000184605.7	ENSMUSG00000098747.7	Gm27216	Annotated_lncRNA	ENSMUST00000028129	ENSMUSG00000026791	Slc2a8	Major facilitator, sugar transporter-like||Sugar transporter, conserved site||Major facilitator superfamily domain||Sugar/inositol transporter||-	-0.984238	1.59423e-06
ENSMUST00000184605.7	ENSMUSG00000098747.7	Gm27216	Annotated_lncRNA	ENSMUST00000093157	ENSMUSG00000031731	Ap1g1	Armadillo-type fold||Clathrin adaptor, alpha/beta/gamma-adaptin, appendage, Ig-like subdomain||-||Adaptor protein complex AP-1, gamma subunit||Coatomer/clathrin adaptor appendage, Ig-like subdomain||Clathrin adaptor, gamma-adaptin, appendage||Clathrin/coatomer adaptor, adaptin-like, N-terminal	0.959977	4.06063e-05
ENSMUST00000184605.7	ENSMUSG00000098747.7	Gm27216	Annotated_lncRNA	ENSMUST00000053729	ENSMUSG00000026784	Pdss1	Polyprenyl synthetase||-||Isoprenoid synthase domain	0.977137	5.81828e-06
ENSMUST00000184605.7	ENSMUSG00000098747.7	Gm27216	Annotated_lncRNA	ENSMUST00000004232	ENSMUSG00000074207	Adh1	Alcohol dehydrogenase, C-terminal||Alcohol dehydrogenase, N-terminal||Alcohol dehydrogenase, zinc-type, conserved site||GroES-like||Polyketide synthase, enoylreductase domain||-	0.980326	3.45026e-06
ENSMUST00000184605.7	ENSMUSG00000098747.7	Gm27216	Annotated_lncRNA	ENSMUST00000032429	ENSMUSG00000030291	Med21	Mediator complex, subunit Med21	0.963424	2.97295e-05
ENSMUST00000184605.7	ENSMUSG00000098747.7	Gm27216	Annotated_lncRNA	ENSMUST00000026552	ENSMUSG00000025479	Cyp2e1	Cytochrome P450, conserved site||Cytochrome P450||Cytochrome P450, E-class, group I, CYP2E-like||Cytochrome P450, E-class, group I	0.981016	3.0467e-06
ENSMUST00000184605.7	ENSMUSG00000098747.7	Gm27216	Annotated_lncRNA	ENSMUST00000041768	ENSMUSG00000033715	Akr1c14	Aldo/keto reductase, conserved site||NADP-dependent oxidoreductase domain||Aldo/keto reductase subgroup	0.977012	5.93015e-06
ENSMUST00000184605.7	ENSMUSG00000098747.7	Gm27216	Annotated_lncRNA	ENSMUST00000049470	ENSMUSG00000042305	Tmem183a	F-box domain||-	0.979532	3.95936e-06
ENSMUST00000184605.7	ENSMUSG00000098747.7	Gm27216	Annotated_lncRNA	ENSMUST00000051633	ENSMUSG00000047719	Ubiad1	UbiA prenyltransferase family||UbiA prenyltransferase domain containing protein 1	0.963478	2.95783e-05
ENSMUST00000184605.7	ENSMUSG00000098747.7	Gm27216	Annotated_lncRNA	ENSMUST00000034524	ENSMUSG00000032026	Rexo2	Ribonuclease H-like domain||Exonuclease, RNase T/DNA polymerase III	0.955814	5.71778e-05
ENSMUST00000184605.7	ENSMUSG00000098747.7	Gm27216	Annotated_lncRNA	ENSMUST00000058488	ENSMUSG00000032353	Tmed3	GOLD domain	0.960957	3.72692e-05
ENSMUST00000184605.7	ENSMUSG00000098747.7	Gm27216	Annotated_lncRNA	ENSMUST00000052740	ENSMUSG00000046603	Tcaim	Domain of unknown function DUF4460||Domain of unknown function DUF4461	0.965108	2.52501e-05
ENSMUST00000184605.7	ENSMUSG00000098747.7	Gm27216	Annotated_lncRNA	ENSMUST00000034989	ENSMUSG00000032418	Me1	Malic enzyme, N-terminal domain||Malic enzyme, conserved site||Malic oxidoreductase||Malic enzyme, NAD-binding	0.965818	2.35127e-05
ENSMUST00000184605.7	ENSMUSG00000098747.7	Gm27216	Annotated_lncRNA	ENSMUST00000122194	ENSMUSG00000021236	Entpd5	Nucleoside phosphatase GDA1/CD39	0.965131	2.51929e-05
ENSMUST00000184605.7	ENSMUSG00000098747.7	Gm27216	Annotated_lncRNA	ENSMUST00000044286	ENSMUSG00000039199	Zdhhc1	Zinc finger, DHHC-type, palmitoyltransferase	-0.951912	7.65903e-05
ENSMUST00000184605.7	ENSMUSG00000098747.7	Gm27216	Annotated_lncRNA	ENSMUST00000028332	ENSMUSG00000026958	Dpp7	Peptidase S28||Alpha/Beta hydrolase fold	0.985528	1.1838e-06
ENSMUST00000184605.7	ENSMUSG00000098747.7	Gm27216	Annotated_lncRNA	ENSMUST00000082424	ENSMUSG00000064373	Sepp1	Selenoprotein P, N-terminal||Selenoprotein P, C-terminal	0.966768	2.13236e-05
ENSMUST00000184605.7	ENSMUSG00000098747.7	Gm27216	Annotated_lncRNA	ENSMUST00000022871	ENSMUSG00000022261	Sdc2	Syndecan, conserved site||Neurexin/syndecan/glycophorin C||Syndecan/Neurexin domain	0.979194	4.19165e-06
ENSMUST00000184605.7	ENSMUSG00000098747.7	Gm27216	Annotated_lncRNA	ENSMUST00000023754	ENSMUSG00000043144	Aqp6	Aquaporin 6||Aquaporin-like||Major intrinsic protein, conserved site||Major intrinsic protein	-0.952843	7.15926e-05
ENSMUST00000184605.7	ENSMUSG00000098747.7	Gm27216	Annotated_lncRNA	ENSMUST00000179636	ENSMUSG00000019894	Slc6a15	Sodium:neurotransmitter symporter||Sodium:neurotransmitter symporter, orphan	0.971378	1.27005e-05
ENSMUST00000184605.7	ENSMUSG00000098747.7	Gm27216	Annotated_lncRNA	ENSMUST00000132374	ENSMUSG00000021772	Nkiras1	Small GTPase superfamily, Rab type||Small GTPase superfamily, Ras type||Small GTP-binding protein domain||P-loop containing nucleoside triphosphate hydrolase||Small GTPase superfamily	0.955286	5.95761e-05
ENSMUST00000184605.7	ENSMUSG00000098747.7	Gm27216	Annotated_lncRNA	ENSMUST00000021920	ENSMUSG00000021468	Sptlc1	Aminotransferase, class I/classII||Pyridoxal phosphate-dependent transferase	0.981027	3.04064e-06
ENSMUST00000184605.7	ENSMUSG00000098747.7	Gm27216	Annotated_lncRNA	ENSMUST00000090398	ENSMUSG00000021782	Dlg5	Domain of unknown function DUF622||Guanylate kinase-like domain||Guanylate kinase/L-type calcium channel beta subunit||CARD domain||P-loop containing nucleoside triphosphate hydrolase||Death-like domain||PDZ domain||SH3 domain	-0.975635	7.25895e-06
ENSMUST00000184605.7	ENSMUSG00000098747.7	Gm27216	Annotated_lncRNA	ENSMUST00000027381	ENSMUSG00000026189	Pecr	-||Glucose/ribitol dehydrogenase||Short-chain dehydrogenase/reductase SDR	0.980604	3.28344e-06
ENSMUST00000184605.7	ENSMUSG00000098747.7	Gm27216	Annotated_lncRNA	ENSMUST00000149405	ENSMUSG00000052712	BC004004	-	0.951521	7.87664e-05
ENSMUST00000184605.7	ENSMUSG00000098747.7	Gm27216	Annotated_lncRNA	ENSMUST00000159899	ENSMUSG00000039047	Pigk	Peptidase C13, legumain||GPI-anchor transamidase||-	0.971473	1.25552e-05
ENSMUST00000184605.7	ENSMUSG00000098747.7	Gm27216	Annotated_lncRNA	ENSMUST00000118991	ENSMUSG00000024070	Prkd3	Pleckstrin homology domain||Serine/threonine/dual specificity protein kinase, catalytic domain||Protein kinase domain||Protein kinase-like domain||Protein kinase, ATP binding site||Protein kinase C mu-related||Protein kinase C-like, phorbol ester/diacylglycerol-binding domain||Serine/threonine-protein kinase, active site||Diacylglycerol/phorbol-ester binding	0.966796	2.12624e-05
ENSMUST00000184605.7	ENSMUSG00000098747.7	Gm27216	Annotated_lncRNA	ENSMUST00000028619	ENSMUSG00000027195	Hsd17b12	Short-chain dehydrogenase/reductase, conserved site||Short-chain dehydrogenase/reductase SDR||Glucose/ribitol dehydrogenase	0.954202	6.47137e-05
ENSMUST00000184605.7	ENSMUSG00000098747.7	Gm27216	Annotated_lncRNA	ENSMUST00000020488	ENSMUSG00000020255	D10Wsu102e	Protein of unknown function DUF4598	0.972881	1.05311e-05
ENSMUST00000184605.7	ENSMUSG00000098747.7	Gm27216	Annotated_lncRNA	ENSMUST00000107909	ENSMUSG00000069769	Msi2	RNA recognition motif domain	-0.973009	1.03603e-05
ENSMUST00000184605.7	ENSMUSG00000098747.7	Gm27216	Annotated_lncRNA	ENSMUST00000022616	ENSMUSG00000022037	Clu	-||Clusterin||Clusterin-like||Clusterin, N-terminal||Clusterin, C-terminal	-0.953328	6.9083e-05
ENSMUST00000184605.7	ENSMUSG00000098747.7	Gm27216	Annotated_lncRNA	ENSMUST00000023590	ENSMUSG00000022877	Hrg	Cystatin domain	0.966037	2.29947e-05
ENSMUST00000184605.7	ENSMUSG00000098747.7	Gm27216	Annotated_lncRNA	ENSMUST00000080030	ENSMUSG00000062203	Gspt1	Ataxin-2, C-terminal||P-loop containing nucleoside triphosphate hydrolase||Transcription factor, GTP-binding domain||Translation elongation factor EF1A/initiation factor IF2gamma, C-terminal||Translation elongation factor EFTu/EF1A, C-terminal||Translation protein, beta-barrel domain||Tr-type G domain, conserved site||Translation elongation factor EFTu/EF1A, domain 2	0.951493	7.89193e-05
ENSMUST00000184605.7	ENSMUSG00000098747.7	Gm27216	Annotated_lncRNA	ENSMUST00000175646	ENSMUSG00000042410	Agps	FAD-linked oxidase, C-terminal||FAD-linked oxidase-like, C-terminal||-||FAD linked oxidase, N-terminal||FAD-binding, type 2	0.96725	2.0271e-05
ENSMUST00000184605.7	ENSMUSG00000098747.7	Gm27216	Annotated_lncRNA	ENSMUST00000015712	ENSMUSG00000015568	Lpl	Alpha/Beta hydrolase fold||Lipase, N-terminal||Triacylglycerol lipase family||PLAT/LH2 domain||Lipase, LIPH-type||Lipoprotein lipase	0.980522	3.33199e-06
ENSMUST00000184605.7	ENSMUSG00000098747.7	Gm27216	Annotated_lncRNA	ENSMUST00000036561	ENSMUSG00000032512	Wdr48	G-protein beta WD-40 repeat||Protein of unknown function DUF3337||WD40 repeat||WD40-repeat-containing domain||WD40 repeat, conserved site	0.953274	6.93567e-05
ENSMUST00000184605.7	ENSMUSG00000098747.7	Gm27216	Annotated_lncRNA	ENSMUST00000153664	ENSMUSG00000029103	Lrpap1	Alpha-2-macroglobulin RAP, C-terminal||Alpha-2-macroglobulin receptor-associated protein, domain 1	0.972091	1.16352e-05
ENSMUST00000184605.7	ENSMUSG00000098747.7	Gm27216	Annotated_lncRNA	ENSMUST00000066330	ENSMUSG00000005417	Mprip	Pleckstrin homology domain||-	-0.968255	1.81931e-05
ENSMUST00000184605.7	ENSMUSG00000098747.7	Gm27216	Annotated_lncRNA	ENSMUST00000169095	ENSMUSG00000002944	Cd36	Adhesion molecule CD36||CD36 antigen	0.959867	4.09945e-05
ENSMUST00000184605.7	ENSMUSG00000098747.7	Gm27216	Annotated_lncRNA	ENSMUST00000114091	ENSMUSG00000031402	Mpp1	PDZ domain||Guanylate kinase, conserved site||P-loop containing nucleoside triphosphate hydrolase||SH3 domain||Guanylate kinase-like domain||-||Variant SH3 domain||Guanylate kinase/L-type calcium channel beta subunit	0.973388	9.86265e-06
ENSMUST00000184605.7	ENSMUSG00000098747.7	Gm27216	Annotated_lncRNA	ENSMUST00000061491	ENSMUSG00000027359	Slc27a2	AMP-binding, conserved site||AMP-binding enzyme C-terminal domain||AMP-dependent synthetase/ligase	0.967575	1.95818e-05
ENSMUST00000184605.7	ENSMUSG00000098747.7	Gm27216	Annotated_lncRNA	ENSMUST00000031281	ENSMUSG00000029338	Antxr2	Anthrax toxin receptor, extracellular||Anthrax toxin receptor, C-terminal||von Willebrand factor, type A||Anthrax toxin receptor	0.952202	7.50096e-05
ENSMUST00000184605.7	ENSMUSG00000098747.7	Gm27216	Annotated_lncRNA	ENSMUST00000124947	ENSMUSG00000022679	Mpv17l	Mpv17/PMP22||-	0.969207	1.63708e-05
ENSMUST00000184605.7	ENSMUSG00000098747.7	Gm27216	Annotated_lncRNA	ENSMUST00000029374	ENSMUSG00000027799	Nbea	PH-BEACH domain||BEACH domain||WD40-repeat-containing domain||Concanavalin A-like lectin/glucanase domain||Domain of unknown function DUF1088||WD40 repeat||Armadillo-type fold	-0.972403	1.11903e-05
ENSMUST00000184605.7	ENSMUSG00000098747.7	Gm27216	Annotated_lncRNA	ENSMUST00000125770	ENSMUSG00000006345	Ggt1	Nucleophile aminohydrolases, N-terminal||Gamma-glutamyltranspeptidase||-	0.958731	4.51504e-05
ENSMUST00000184605.7	ENSMUSG00000098747.7	Gm27216	Annotated_lncRNA	ENSMUST00000077196	ENSMUSG00000037185	Krt80	Keratin, type II||Intermediate filament protein	-0.963927	2.83356e-05
ENSMUST00000184605.7	ENSMUSG00000098747.7	Gm27216	Annotated_lncRNA	ENSMUST00000163705	ENSMUSG00000038522	AI317395	Major facilitator superfamily domain||Major facilitator superfamily	0.960716	3.80718e-05
ENSMUST00000184605.7	ENSMUSG00000098747.7	Gm27216	Annotated_lncRNA	ENSMUST00000127247	ENSMUSG00000048022	Tmem229a	-	0.957253	5.0994e-05
ENSMUST00000184605.7	ENSMUSG00000098747.7	Gm27216	Annotated_lncRNA	ENSMUST00000118768	ENSMUSG00000024070	Prkd3	Pleckstrin homology domain||Serine/threonine/dual specificity protein kinase, catalytic domain||Protein kinase domain||Protein kinase-like domain||Protein kinase, ATP binding site||Protein kinase C mu-related||Protein kinase C-like, phorbol ester/diacylglycerol-binding domain||Serine/threonine-protein kinase, active site||Diacylglycerol/phorbol-ester binding	0.971436	1.26115e-05
ENSMUST00000184605.7	ENSMUSG00000098747.7	Gm27216	Annotated_lncRNA	ENSMUST00000107050	ENSMUSG00000028088	Fmo5	Flavin monooxygenase-like||Flavin monooxygenase FMO||Dimethylaniline monooxygenase, N-oxide-forming||Flavin monooxygenase (FMO) 5	0.953621	6.75949e-05
ENSMUST00000184605.7	ENSMUSG00000098747.7	Gm27216	Annotated_lncRNA	ENSMUST00000021691	ENSMUSG00000021263	Degs2	Sphingolipid delta4-desaturase, N-terminal||Sphingolipid delta4-desaturase||Fatty acid desaturase domain	0.981637	2.7136e-06
ENSMUST00000184605.7	ENSMUSG00000098747.7	Gm27216	Annotated_lncRNA	ENSMUST00000034141	ENSMUSG00000047866	Lonp2	Lon protease, bacterial/eukaryotic-type||Ribosomal protein S5 domain 2-type fold||Peptidase S16, Lon C-terminal||ATPase, AAA-type, core||ATP-dependent protease La (LON), substrate-binding domain||Peptidase S16, active site||PUA-like domain||P-loop containing nucleoside triphosphate hydrolase||AAA+ ATPase domain	0.95425	6.44828e-05
ENSMUST00000184605.7	ENSMUSG00000098747.7	Gm27216	Annotated_lncRNA	ENSMUST00000023805	ENSMUSG00000023044	Csad	Pyridoxal-phosphate binding site||Pyridoxal phosphate-dependent decarboxylase||Pyridoxal phosphate-dependent transferase	0.959089	4.38105e-05
ENSMUST00000184605.7	ENSMUSG00000098747.7	Gm27216	Annotated_lncRNA	ENSMUST00000107021	ENSMUSG00000063730	Hsd3b2	3-beta hydroxysteroid dehydrogenase/isomerase	0.950228	8.62555e-05
ENSMUST00000184605.7	ENSMUSG00000098747.7	Gm27216	Annotated_lncRNA	ENSMUST00000000260	ENSMUSG00000000253	Gmpr	IMP dehydrogenase/GMP reductase||Guanosine monophosphate reductase 1||IMP dehydrogenase / GMP reductase, conserved site	0.965875	2.33782e-05
ENSMUST00000184605.7	ENSMUSG00000098747.7	Gm27216	Annotated_lncRNA	ENSMUST00000143226	ENSMUSG00000006345	Ggt1	Nucleophile aminohydrolases, N-terminal||Gamma-glutamyltranspeptidase||-	0.962284	3.30627e-05
ENSMUST00000184605.7	ENSMUSG00000098747.7	Gm27216	Annotated_lncRNA	ENSMUST00000084343	ENSMUSG00000066071	Cyp4a12a	Cytochrome P450, conserved site||Cytochrome P450||Cytochrome P450, E-class, group I	0.975812	7.07699e-06
ENSMUST00000184605.7	ENSMUSG00000098747.7	Gm27216	Annotated_lncRNA	ENSMUST00000107591	ENSMUSG00000030498	Gas2	Calponin homology domain||Growth-arrest-specific protein 2 domain||-	0.980183	3.53806e-06
ENSMUST00000184605.7	ENSMUSG00000098747.7	Gm27216	Annotated_lncRNA	ENSMUST00000029711	ENSMUSG00000005640	Insrr	Fibronectin type III||Furin-like cysteine-rich domain||Protein kinase, ATP binding site||Protein kinase-like domain||Tyrosine-protein kinase, insulin-like receptor||Serine-threonine/tyrosine-protein kinase catalytic domain||Tyrosine-protein kinase, catalytic domain||Tyrosine-protein kinase, receptor class II, conserved site||Receptor L-domain||Protein kinase domain||Insulin-like growth factor bin…	-0.960337	3.93575e-05
ENSMUST00000184605.7	ENSMUSG00000098747.7	Gm27216	Annotated_lncRNA	ENSMUST00000072697	ENSMUSG00000062908	Acadm	Acyl-CoA dehydrogenase/oxidase C-terminal||Acyl-CoA oxidase/dehydrogenase, central domain||Acyl-CoA dehydrogenase, conserved site||Acyl-CoA dehydrogenase/oxidase, N-terminal||Acyl-CoA dehydrogenase/oxidase, N-terminal and middle domain	0.970096	1.47884e-05
ENSMUST00000184605.7	ENSMUSG00000098747.7	Gm27216	Annotated_lncRNA	ENSMUST00000027472	ENSMUSG00000026255	Efhd1	EF-hand domain pair||EF-hand domain	-0.956216	5.54018e-05
ENSMUST00000184605.7	ENSMUSG00000098747.7	Gm27216	Annotated_lncRNA	ENSMUST00000107256	ENSMUSG00000030559	Rab38	Small GTPase superfamily, Rab type||Small GTPase superfamily, Ras type||P-loop containing nucleoside triphosphate hydrolase||Small GTPase superfamily, Rho type||Small GTP-binding protein domain||Ran GTPase||Small GTPase superfamily	0.965304	2.47624e-05
ENSMUST00000184605.7	ENSMUSG00000098747.7	Gm27216	Annotated_lncRNA	ENSMUST00000139049	ENSMUSG00000079104	Prps1l3	Phosphoribosyltransferase-like||Ribose-phosphate pyrophosphokinase, N-terminal domain||Ribose-phosphate diphosphokinase||Phosphoribosyl pyrophosphate synthetase, conserved site	0.955367	5.92039e-05
ENSMUST00000184605.7	ENSMUSG00000098747.7	Gm27216	Annotated_lncRNA	ENSMUST00000026324	ENSMUSG00000025287	Acot9	-||HotDog domain	0.954124	6.50972e-05
ENSMUST00000184605.7	ENSMUSG00000098747.7	Gm27216	Annotated_lncRNA	ENSMUST00000045303	ENSMUSG00000040447	Spns2	Major facilitator superfamily domain||Major facilitator superfamily||-	-0.956955	5.22327e-05
ENSMUST00000184605.7	ENSMUSG00000098747.7	Gm27216	Annotated_lncRNA	ENSMUST00000179171	ENSMUSG00000064202	4430402I18Rik	-	0.957222	5.11223e-05
ENSMUST00000184605.7	ENSMUSG00000098747.7	Gm27216	Annotated_lncRNA	ENSMUST00000000049	ENSMUSG00000000049	Apoh	Sushi/SCR/CCP domain||Beta-2-glycoprotein-1 fifth domain||-	0.957511	4.99383e-05
ENSMUST00000184605.7	ENSMUSG00000098747.7	Gm27216	Annotated_lncRNA	ENSMUST00000048967	ENSMUSG00000037852	Cpe	Carboxypeptidase-like, regulatory domain||Peptidase M14, carboxypeptidase A	0.978419	4.76013e-06
ENSMUST00000184605.7	ENSMUSG00000098747.7	Gm27216	Annotated_lncRNA	ENSMUST00000072403	ENSMUSG00000049152	Ugt3a2	UDP-glucuronosyl/UDP-glucosyltransferase	0.967782	1.91513e-05
ENSMUST00000184605.7	ENSMUSG00000098747.7	Gm27216	Annotated_lncRNA	ENSMUST00000028278	ENSMUSG00000026914	Psmd14	Rpn11/EIF3F, C-terminal||JAB1/MPN/MOV34 metalloenzyme domain	0.953734	6.70279e-05
ENSMUST00000184605.7	ENSMUSG00000098747.7	Gm27216	Annotated_lncRNA	ENSMUST00000003720	ENSMUSG00000003623	Crot	Acyltransferase ChoActase/COT/CPT	0.9773	5.67552e-06
ENSMUST00000184605.7	ENSMUSG00000098747.7	Gm27216	Annotated_lncRNA	ENSMUST00000053771	ENSMUSG00000036879	Phkb	Six-hairpin glycosidase-like||-||Glycoside hydrolase family 15/Phosphorylase b kinase regulatory chain family	0.974999	7.9391e-06
ENSMUST00000184605.7	ENSMUSG00000098747.7	Gm27216	Annotated_lncRNA	ENSMUST00000047627	ENSMUSG00000032745	Gpbp1	Vasculin family||-	0.967425	1.98968e-05
ENSMUST00000184605.7	ENSMUSG00000098747.7	Gm27216	Annotated_lncRNA	ENSMUST00000061295	ENSMUSG00000038009	Dnajc22	DnaJ domain||TM2 domain	0.991354	1.96249e-07
ENSMUST00000184605.7	ENSMUSG00000098747.7	Gm27216	Annotated_lncRNA	ENSMUST00000027036	ENSMUSG00000025903	Lypla1	Alpha/Beta hydrolase fold||Phospholipase/carboxylesterase/thioesterase	0.978843	4.44248e-06
ENSMUST00000184605.7	ENSMUSG00000098747.7	Gm27216	Annotated_lncRNA	ENSMUST00000151689	ENSMUSG00000031232	Magt1	Thioredoxin-like fold||Thioredoxin domain||Oligosaccharyl transferase complex, subunit OST3/OST6	0.972456	1.11162e-05
ENSMUST00000184605.7	ENSMUSG00000098747.7	Gm27216	Annotated_lncRNA	ENSMUST00000039449	ENSMUSG00000052299	Ltn1	Zinc finger, RING-CH-type||Zinc finger, RING-type||Armadillo-type fold||FANCL C-terminal domain	0.954437	6.35738e-05
ENSMUST00000184605.7	ENSMUSG00000098747.7	Gm27216	Annotated_lncRNA	ENSMUST00000056136	ENSMUSG00000044708	Kcnj10	Potassium channel, inwardly rectifying, Kir1.2||Immunoglobulin E-set||Potassium channel, inwardly rectifying, Kir	-0.95528	5.96013e-05
ENSMUST00000184605.7	ENSMUSG00000098747.7	Gm27216	Annotated_lncRNA	ENSMUST00000111601	ENSMUSG00000075224	Lrrc55	Leucine-rich repeat, typical subtype||Cysteine-rich flanking region, C-terminal||Leucine-rich repeat N-terminal domain||Leucine-rich repeat	0.954827	6.17141e-05
ENSMUST00000184605.7	ENSMUSG00000098747.7	Gm27216	Annotated_lncRNA	ENSMUST00000025523	ENSMUSG00000024621	Csf1r	Serine-threonine/tyrosine-protein kinase catalytic domain||Macrophage colony-stimulating factor 1 receptor||Tyrosine-protein kinase, catalytic domain||Protein kinase domain||Tyrosine-protein kinase, CSF-1/PDGF receptor family||Tyrosine-protein kinase, active site||Immunoglobulin-like domain||Tyrosine-protein kinase, receptor class III, conserved site||Protein kinase, ATP binding site||Immunoglobu…	0.96667	2.15432e-05
ENSMUST00000184605.7	ENSMUSG00000098747.7	Gm27216	Annotated_lncRNA	ENSMUST00000033289	ENSMUSG00000030987	Stim1	Sterile alpha motif/pointed domain||Sterile alpha motif domain	-0.953245	6.95077e-05
ENSMUST00000184605.7	ENSMUSG00000098747.7	Gm27216	Annotated_lncRNA	ENSMUST00000034564	ENSMUSG00000032062	2310030G06Rik	Protein of unknown function DUF4578	0.956077	5.6011e-05
ENSMUST00000184605.7	ENSMUSG00000098747.7	Gm27216	Annotated_lncRNA	ENSMUST00000128994	ENSMUSG00000027411	Vps16	Vacuolar protein sorting-associated protein 16||Vps16, N-terminal||Vps16, C-terminal	0.971588	1.23804e-05
ENSMUST00000184605.7	ENSMUSG00000098747.7	Gm27216	Annotated_lncRNA	ENSMUST00000030882	ENSMUSG00000029017	Pmpcb	Metalloenzyme, LuxS/M16 peptidase-like||Peptidase M16, C-terminal||Peptidase M16, zinc-binding site||Peptidase M16, N-terminal||-	0.955241	5.97822e-05
ENSMUST00000184605.7	ENSMUSG00000098747.7	Gm27216	Annotated_lncRNA	ENSMUST00000051386	ENSMUSG00000038775	Vill	Villin headpiece||Gelsolin-like domain||Villin/Gelsolin||-	0.96942	1.59798e-05
ENSMUST00000184605.7	ENSMUSG00000098747.7	Gm27216	Annotated_lncRNA	ENSMUST00000085272	ENSMUSG00000039745	Htatip2	Semialdehyde dehydrogenase, NAD-binding	0.954504	6.32508e-05
ENSMUST00000184605.7	ENSMUSG00000098747.7	Gm27216	Annotated_lncRNA	ENSMUST00000042119	ENSMUSG00000041698	Slco1a1	Kazal domain||Organic anion transporter polypeptide OATP||Major facilitator superfamily domain	0.953502	6.81955e-05
ENSMUST00000184605.7	ENSMUSG00000098747.7	Gm27216	Annotated_lncRNA	ENSMUST00000048032	ENSMUSG00000032758	Kap	Kidney androgen-regulated protein	0.977494	5.50858e-06
ENSMUST00000184605.7	ENSMUSG00000098747.7	Gm27216	Annotated_lncRNA	ENSMUST00000039721	ENSMUSG00000036083	Slc17a3	Major facilitator superfamily||Major facilitator superfamily domain||Sodium-dependent phosphate transport protein 4 , predicted	0.977272	5.69969e-06
ENSMUST00000184605.7	ENSMUSG00000098747.7	Gm27216	Annotated_lncRNA	ENSMUST00000038551	ENSMUSG00000034709	Ppp1r21	Uncharacterised domain KLRAQ/TTKRSYEDQ, C-terminal||Uncharacterised domain KLRAQ/TTKRSYEDQ, N-terminal	0.972901	1.05039e-05
ENSMUST00000184605.7	ENSMUSG00000098747.7	Gm27216	Annotated_lncRNA	ENSMUST00000072818	ENSMUSG00000061906	Ugt2b38	UDP-glucuronosyl/UDP-glucosyltransferase	0.979902	3.71604e-06
ENSMUST00000184605.7	ENSMUSG00000098747.7	Gm27216	Annotated_lncRNA	ENSMUST00000025598	ENSMUSG00000024694	Keg1	Glycine N-acyltransferase, C-terminal||Acyl-CoA N-acyltransferase||Glycine N-acyltransferase, N-terminal	0.979181	4.20076e-06
ENSMUST00000184605.7	ENSMUSG00000098747.7	Gm27216	Annotated_lncRNA	ENSMUST00000022368	ENSMUSG00000021822	Plau	Kringle||Peptidase S1A, chymotrypsin-type||Peptidase S1, PA clan||Peptidase S1, trypsin family, active site||Kringle, conserved site||EGF-like, conserved site||EGF-like domain||Serine proteases, trypsin domain||Kringle-like fold	0.961752	3.47065e-05
ENSMUST00000184605.7	ENSMUSG00000098747.7	Gm27216	Annotated_lncRNA	ENSMUST00000006137	ENSMUSG00000005981	Trap1	Heat shock protein Hsp90 family||-||Heat shock protein Hsp90, N-terminal||Ribosomal protein S5 domain 2-type fold||Histidine kinase-like ATPase, C-terminal domain	0.961104	3.6783e-05
ENSMUST00000184605.7	ENSMUSG00000098747.7	Gm27216	Annotated_lncRNA	ENSMUST00000007212	ENSMUSG00000006998	Psmd2	26S proteasome regulatory complex, non-ATPase subcomplex, Rpn1 subunit||-||Armadillo-type fold||Proteasome/cyclosome repeat	0.973402	9.84503e-06
ENSMUST00000184605.7	ENSMUSG00000098747.7	Gm27216	Annotated_lncRNA	ENSMUST00000068545	ENSMUSG00000055137	Sugct	CoA-transferase family III domain||CoA-transferase family III	0.979423	4.03308e-06
ENSMUST00000184605.7	ENSMUSG00000098747.7	Gm27216	Annotated_lncRNA	ENSMUST00000066568	ENSMUSG00000053870	Fpgt	Trimeric LpxA-like||Fucose-1-phosphate guanylyltransferase||L-fucokinase	0.971453	1.25861e-05
ENSMUST00000184605.7	ENSMUSG00000098747.7	Gm27216	Annotated_lncRNA	ENSMUST00000025666	ENSMUSG00000024757	Slc22a19	Major facilitator superfamily domain||Major facilitator, sugar transporter-like	0.960646	3.83043e-05
ENSMUST00000184605.7	ENSMUSG00000098747.7	Gm27216	Annotated_lncRNA	ENSMUST00000046959	ENSMUSG00000040966	Slc22a2	Organic cation transport protein||Major facilitator, sugar transporter-like||Sugar transporter, conserved site||Major facilitator superfamily domain	0.980159	3.55276e-06
ENSMUST00000184605.7	ENSMUSG00000098747.7	Gm27216	Annotated_lncRNA	ENSMUST00000003509	ENSMUSG00000003418	St8sia6	Sialyltransferase||Glycosyl transferase, family 29	0.971147	1.30611e-05
ENSMUST00000184605.7	ENSMUSG00000098747.7	Gm27216	Annotated_lncRNA	ENSMUST00000122865	ENSMUSG00000034135	Sik3	Protein kinase, ATP binding site||-||Serine/threonine/dual specificity protein kinase, catalytic domain||Protein kinase-like domain||Protein kinase domain||Ubiquitin-associated domain||Serine/threonine-protein kinase, active site	-0.962919	3.11756e-05
ENSMUST00000184605.7	ENSMUSG00000098747.7	Gm27216	Annotated_lncRNA	ENSMUST00000191104	ENSMUSG00000055322	Tns1	Tensin phosphotyrosine-binding domain||C2 domain||Protein-tyrosine phosphatase, catalytic||-||Protein-tyrosine phosphatase-like||PTB/PI domain||Tensin phosphatase, lipid phosphatase domain||SH2 domain||Protein kinase C-like, phorbol ester/diacylglycerol-binding domain||Tensin phosphatase, C2 domain	-0.962543	3.22823e-05
ENSMUST00000184605.7	ENSMUSG00000098747.7	Gm27216	Annotated_lncRNA	ENSMUST00000023707	ENSMUSG00000022982	Sod1	Superoxide dismutase, copper/zinc binding domain||Superoxide dismutase, copper/zinc, binding site	0.960334	3.93671e-05
ENSMUST00000184605.7	ENSMUSG00000098747.7	Gm27216	Annotated_lncRNA	ENSMUST00000123082	ENSMUSG00000060771	Tsga10	-	0.965585	2.40725e-05
ENSMUST00000184605.7	ENSMUSG00000098747.7	Gm27216	Annotated_lncRNA	ENSMUST00000097973	ENSMUSG00000028571	Cyp2j13	Cytochrome P450, E-class, group I, CYP2J-like||Cytochrome P450||Cytochrome P450, conserved site||Cytochrome P450, E-class, group I	0.982146	2.46044e-06
ENSMUST00000184605.7	ENSMUSG00000098747.7	Gm27216	Annotated_lncRNA	ENSMUST00000030568	ENSMUSG00000028780	Sema3c	Immunoglobulin subtype 2||Immunoglobulin-like domain||Immunoglobulin I-set||Plexin-like fold||-||Immunoglobulin subtype||Sema domain	0.951795	7.72347e-05
ENSMUST00000184605.7	ENSMUSG00000098747.7	Gm27216	Annotated_lncRNA	ENSMUST00000047929	ENSMUSG00000033533	Acsm1	AMP-dependent synthetase/ligase||AMP-binding, conserved site||AMP-binding enzyme C-terminal domain	0.951359	7.96736e-05
ENSMUST00000184605.7	ENSMUSG00000098747.7	Gm27216	Annotated_lncRNA	ENSMUST00000007602	ENSMUSG00000007458	M6pr	Cation-dependent mannose-6-phosphate receptor||Mannose-6-phosphate receptor||Mannose-6-phosphate receptor binding domain	0.958935	4.43829e-05
ENSMUST00000184605.7	ENSMUSG00000098747.7	Gm27216	Annotated_lncRNA	ENSMUST00000118138	ENSMUSG00000033653	Vps8	Zinc finger, RING-type||WD40 repeat||-||Quinoprotein amine dehydrogenase, beta chain-like||WD40-repeat-containing domain||Vacuolar protein sorting-associated protein 8, central domain	0.967426	1.98953e-05
ENSMUST00000184605.7	ENSMUSG00000098747.7	Gm27216	Annotated_lncRNA	ENSMUST00000102707	ENSMUSG00000028713	Cyp4b1	Cytochrome P450, E-class, group I||Cytochrome P450, conserved site||Cytochrome P450||Cytochrome P450, E-class, group II	0.978065	5.03752e-06
ENSMUST00000184605.7	ENSMUSG00000098747.7	Gm27216	Annotated_lncRNA	ENSMUST00000148891	ENSMUSG00000054728	Phactr1	RPEL repeat	-0.962125	3.35468e-05
ENSMUST00000184605.7	ENSMUSG00000098747.7	Gm27216	Annotated_lncRNA	ENSMUST00000022169	ENSMUSG00000021665	Hexb	Glycoside hydrolase family 20, catalytic domain||Chitobiase/beta-hexosaminidase domain 2-like||Glycoside hydrolase superfamily||Beta-hexosaminidase, eukaryotic type, N-terminal||Beta-hexosaminidase	0.976884	6.04582e-06
ENSMUST00000184605.7	ENSMUSG00000098747.7	Gm27216	Annotated_lncRNA	ENSMUST00000036031	ENSMUSG00000039934	Gsap	Gamma-secretase-activating protein, C-terminal domain||-	0.971619	1.23329e-05
ENSMUST00000184605.7	ENSMUSG00000098747.7	Gm27216	Annotated_lncRNA	ENSMUST00000051594	ENSMUSG00000021697	Depdc1b	Rho GTPase-activating protein domain||Rho GTPase activation protein||DEP domain	0.956912	5.24162e-05
ENSMUST00000184605.7	ENSMUSG00000098747.7	Gm27216	Annotated_lncRNA	ENSMUST00000032824	ENSMUSG00000030603	Psmc4	ATPase, AAA-type, core||26S proteasome subunit P45||P-loop containing nucleoside triphosphate hydrolase||ATPase, AAA-type, conserved site||AAA+ ATPase domain	0.964727	2.62166e-05
ENSMUST00000184605.7	ENSMUSG00000098747.7	Gm27216	Annotated_lncRNA	ENSMUST00000026818	ENSMUSG00000025724	Sec11a	Peptidase S24/S26A/S26B/S26C||Peptidase S26A, signal peptidase I, serine active site||Peptidase S26B||Peptidase S26A, signal peptidase I, conserved site||Peptidase S24/S26A/S26B	0.950762	8.31002e-05
ENSMUST00000184605.7	ENSMUSG00000098747.7	Gm27216	Annotated_lncRNA	ENSMUST00000060212	ENSMUSG00000019810	Fuca2	Glycoside hydrolase, family 29, conserved site||Glycoside hydrolase, family 29||-||Alpha-L-fucosidase, metazoa-type||Glycoside hydrolase superfamily	0.991912	1.55454e-07
ENSMUST00000184605.7	ENSMUSG00000098747.7	Gm27216	Annotated_lncRNA	ENSMUST00000154822	ENSMUSG00000024694	Keg1	Glycine N-acyltransferase, C-terminal||Acyl-CoA N-acyltransferase||Glycine N-acyltransferase, N-terminal	0.988989	4.56306e-07
ENSMUST00000184605.7	ENSMUSG00000098747.7	Gm27216	Annotated_lncRNA	ENSMUST00000008893	ENSMUSG00000024835	Coro1b	WD40-repeat-containing domain||WD40 repeat, conserved site||Domain of unknown function DUF1899||WD40 repeat||Trimerisation motif	0.952918	7.12021e-05
ENSMUST00000184605.7	ENSMUSG00000098747.7	Gm27216	Annotated_lncRNA	ENSMUST00000018727	ENSMUSG00000018583	G3bp1	RNA recognition motif domain||Nuclear transport factor 2||Nuclear transport factor 2, eukaryote	0.955688	5.7745e-05
ENSMUST00000184605.7	ENSMUSG00000098747.7	Gm27216	Annotated_lncRNA	ENSMUST00000021635	ENSMUSG00000021214	Akr1c18	Aldo/keto reductase, conserved site||Aldo/keto reductase subgroup||NADP-dependent oxidoreductase domain	0.961228	3.63786e-05
ENSMUST00000184605.7	ENSMUSG00000098747.7	Gm27216	Annotated_lncRNA	ENSMUST00000168406	ENSMUSG00000023367	Tmem176a	CD20-like family||-	0.975642	7.25234e-06
ENSMUST00000184605.7	ENSMUSG00000098747.7	Gm27216	Annotated_lncRNA	ENSMUST00000023360	ENSMUSG00000022679	Mpv17l	Mpv17/PMP22||-	0.957972	4.8088e-05
ENSMUST00000184605.7	ENSMUSG00000098747.7	Gm27216	Annotated_lncRNA	ENSMUST00000134503	ENSMUSG00000006345	Ggt1	Nucleophile aminohydrolases, N-terminal||Gamma-glutamyltranspeptidase||-	0.977852	5.20977e-06
ENSMUST00000184605.7	ENSMUSG00000098747.7	Gm27216	Annotated_lncRNA	ENSMUST00000130643	ENSMUSG00000004865	Srpk1	Serine/threonine-protein kinase, active site||Protein kinase domain||Protein kinase, ATP binding site||Serine/threonine/dual specificity protein kinase, catalytic domain||-||Protein kinase-like domain	0.961433	3.57185e-05
ENSMUST00000184605.7	ENSMUSG00000098747.7	Gm27216	Annotated_lncRNA	ENSMUST00000013755	ENSMUSG00000013611	Snx31	Phox homologous domain||FERM domain	0.951669	7.79346e-05
ENSMUST00000184605.7	ENSMUSG00000098747.7	Gm27216	Annotated_lncRNA	ENSMUST00000143842	ENSMUSG00000034621	Gpatch8	G-patch domain||Zinc finger, double-stranded RNA binding||Zinc finger, C2H2	-0.96167	3.49629e-05
ENSMUST00000184605.7	ENSMUSG00000098747.7	Gm27216	Annotated_lncRNA	ENSMUST00000160719	ENSMUSG00000031647	Mfap3l	Immunoglobulin subtype||Immunoglobulin subtype 2||Immunoglobulin-like domain||Immunoglobulin I-set	0.972752	1.07059e-05
ENSMUST00000184605.7	ENSMUSG00000098747.7	Gm27216	Annotated_lncRNA	ENSMUST00000022120	ENSMUSG00000021620	Acot12	HotDog domain||START domain||Thioesterase superfamily	0.959719	4.15205e-05
ENSMUST00000184605.7	ENSMUSG00000098747.7	Gm27216	Annotated_lncRNA	ENSMUST00000109901	ENSMUSG00000021111	Papola	Poly(A) polymerase, RNA-binding domain||Polymerase, nucleotidyl transferase domain||Poly(A) polymerase||Poly(A) polymerase, central domain||-||Nucleotidyltransferase, class I, C-terminal-like	0.951671	7.79271e-05
ENSMUST00000184605.7	ENSMUSG00000098747.7	Gm27216	Annotated_lncRNA	ENSMUST00000202361	ENSMUSG00000029657	Hsph1	Heat shock protein 70, conserved site||Heat shock protein 70kD, peptide-binding domain||Heat shock protein 70kD, C-terminal domain||Heat shock protein 70 family	0.953331	6.90681e-05
ENSMUST00000184605.7	ENSMUSG00000098747.7	Gm27216	Annotated_lncRNA	ENSMUST00000117798	ENSMUSG00000034949	Zfr2	Zinc finger, U1-type||Zinc finger, C2H2||-||2-5-oligoadenylate synthetase, N-terminal||DZF domain||Zinc finger, C2H2-like	-0.954187	6.47893e-05
ENSMUST00000184605.7	ENSMUSG00000098747.7	Gm27216	Annotated_lncRNA	ENSMUST00000074127	ENSMUSG00000010025	Aldh3a2	Aldehyde dehydrogenase NAD(P)-dependent||Aldehyde dehydrogenase domain||Aldehyde/histidinol dehydrogenase||Aldehyde dehydrogenase, cysteine active site||Aldehyde dehydrogenase, glutamic acid active site	0.984307	1.57001e-06
ENSMUST00000184605.7	ENSMUSG00000098747.7	Gm27216	Annotated_lncRNA	ENSMUST00000026406	ENSMUSG00000025350	Rdh5	Short-chain dehydrogenase/reductase SDR||-||Glucose/ribitol dehydrogenase	0.954012	6.5648e-05
ENSMUST00000184605.7	ENSMUSG00000098747.7	Gm27216	Annotated_lncRNA	ENSMUST00000042699	ENSMUSG00000037542	Aldh8a1	Aldehyde dehydrogenase domain||Aldehyde dehydrogenase, glutamic acid active site||Aldehyde/histidinol dehydrogenase||Aldehyde dehydrogenase, cysteine active site	0.972304	1.13307e-05
ENSMUST00000184605.7	ENSMUSG00000098747.7	Gm27216	Annotated_lncRNA	ENSMUST00000107337	ENSMUSG00000008305	Tle1	-||WD40 repeat||Groucho/transducin-like enhancer||Groucho/TLE, N-terminal Q-rich domain||WD40 repeat, conserved site||WD40-repeat-containing domain	-0.958694	4.52907e-05
ENSMUST00000184605.7	ENSMUSG00000098747.7	Gm27216	Annotated_lncRNA	ENSMUST00000002655	ENSMUSG00000002580	Mien1	Selenoprotein, Rdx type||Thioredoxin-like fold	0.977318	5.66028e-06
ENSMUST00000184605.7	ENSMUSG00000098747.7	Gm27216	Annotated_lncRNA	ENSMUST00000010698	ENSMUSG00000010554	Mettl16	S-adenosyl-L-methionine-dependent methyltransferase||Ribosomal RNA large subunit methyltransferase F-like||S-adenosyl-L-methionine dependent methyltransferase, Mett10D, predicted	0.958819	4.48184e-05
ENSMUST00000184605.7	ENSMUSG00000098747.7	Gm27216	Annotated_lncRNA	ENSMUST00000179433	ENSMUSG00000037263	Aldh3b3	-||Aldehyde dehydrogenase, glutamic acid active site||Aldehyde/histidinol dehydrogenase||Aldehyde dehydrogenase, cysteine active site||Aldehyde dehydrogenase domain||Aldehyde dehydrogenase NAD(P)-dependent	0.953051	7.05071e-05
ENSMUST00000184605.7	ENSMUSG00000098747.7	Gm27216	Annotated_lncRNA	ENSMUST00000075994	ENSMUSG00000035357	Pdzrn3	Zinc finger, RING-type||Zinc finger, RING-type, conserved site||TRAF-like||PDZ domain||Zinc finger, TRAF-type	0.956112	5.58565e-05
ENSMUST00000184605.7	ENSMUSG00000098747.7	Gm27216	Annotated_lncRNA	ENSMUST00000072633	ENSMUSG00000020839	Tmigd1	Immunoglobulin subtype||Immunoglobulin I-set||Immunoglobulin-like domain||Immunoglobulin subtype 2	0.9625	3.24115e-05
ENSMUST00000184605.7	ENSMUSG00000098747.7	Gm27216	Annotated_lncRNA	ENSMUST00000034929	ENSMUSG00000032370	Lactb	Beta-lactamase-related||Beta-lactamase/transpeptidase-like	0.961401	3.5821e-05
ENSMUST00000184605.7	ENSMUSG00000098747.7	Gm27216	Annotated_lncRNA	ENSMUST00000035625	ENSMUSG00000039519	Cyp7b1	Cytochrome P450, cholesterol 7-alpha-monooxygenase-type||Cytochrome P450, E-class, group IV||Cytochrome P450	0.968885	1.69718e-05
ENSMUST00000184605.7	ENSMUSG00000098747.7	Gm27216	Annotated_lncRNA	ENSMUST00000009689	ENSMUSG00000009545	Kcnq1	-||Potassium channel||Potassium channel, voltage dependent, KCNQ, C-terminal||Potassium channel, voltage dependent, KCNQ1||Potassium channel, voltage dependent, KCNQ||Ion transport domain	-0.967823	1.90675e-05
ENSMUST00000184605.7	ENSMUSG00000098747.7	Gm27216	Annotated_lncRNA	ENSMUST00000030181	ENSMUSG00000028461	Ccdc107	-	0.952731	7.21812e-05
ENSMUST00000184605.7	ENSMUSG00000098747.7	Gm27216	Annotated_lncRNA	ENSMUST00000096269	ENSMUSG00000052562	Slc22a30	Major facilitator, sugar transporter-like||Major facilitator superfamily domain	0.968055	1.8594e-05
ENSMUST00000184605.7	ENSMUSG00000098747.7	Gm27216	Annotated_lncRNA	ENSMUST00000022861	ENSMUSG00000072664	Ugt3a1	-||UDP-glucuronosyl/UDP-glucosyltransferase	0.954577	6.29044e-05
ENSMUST00000184605.7	ENSMUSG00000098747.7	Gm27216	Annotated_lncRNA	ENSMUST00000117137	ENSMUSG00000023914	Mep1a	Peptidase, metallopeptidase||Concanavalin A-like lectin/glucanase domain||EGF-like domain||MATH/TRAF domain||Peptidase M12A, astacin||MAM domain||TRAF-like||Meprin alpha/beta subunit	0.975891	6.99728e-06
ENSMUST00000184605.7	ENSMUSG00000098747.7	Gm27216	Annotated_lncRNA	ENSMUST00000161401	ENSMUSG00000063694	Cycs	Cytochrome c-like domain||Cytochrome c, class IA/ IB	0.959093	4.37957e-05
ENSMUST00000184605.7	ENSMUSG00000098747.7	Gm27216	Annotated_lncRNA	ENSMUST00000010198	ENSMUSG00000010054	Tusc2	Tumour suppressor candidate 2	0.988345	5.56355e-07
ENSMUST00000184605.7	ENSMUSG00000098747.7	Gm27216	Annotated_lncRNA	ENSMUST00000025419	ENSMUSG00000024538	Ppic	Cyclophilin-like domain||Cyclophilin-type peptidyl-prolyl cis-trans isomerase, conserved site||Cyclophilin-type peptidyl-prolyl cis-trans isomerase domain	0.963361	2.99075e-05
ENSMUST00000184605.7	ENSMUSG00000098747.7	Gm27216	Annotated_lncRNA	ENSMUST00000024944	ENSMUSG00000024131	Slc3a1	Glycoside hydrolase superfamily||Glycosyl hydrolase, family 13, subfamily, catalytic domain||Glycosyl hydrolase, family 13, catalytic domain	0.98094	3.08958e-06
ENSMUST00000184605.7	ENSMUSG00000098747.7	Gm27216	Annotated_lncRNA	ENSMUST00000149579	ENSMUSG00000039219	Arid4b	RNA binding activity-knot of a chromodomain||RBB1NT||Tudor domain||Chromo domain-like||ARID DNA-binding domain	-0.957468	5.01119e-05
ENSMUST00000184605.7	ENSMUSG00000098747.7	Gm27216	Annotated_lncRNA	ENSMUST00000052124	ENSMUSG00000039193	Nlrc4	CARD domain||P-loop containing nucleoside triphosphate hydrolase||Death-like domain||NACHT nucleoside triphosphatase	0.980881	3.12286e-06
ENSMUST00000184605.7	ENSMUSG00000098747.7	Gm27216	Annotated_lncRNA	ENSMUST00000070731	ENSMUSG00000021756	Il6st	Type I cytokine receptor, cytokine-binding domain||-||Immunoglobulin C2-set-like, ligand-binding||Fibronectin type III||Immunoglobulin-like domain||Long hematopoietin receptor, Gp130 family 2, conserved site	0.960759	3.79253e-05
ENSMUST00000184605.7	ENSMUSG00000098747.7	Gm27216	Annotated_lncRNA	ENSMUST00000028769	ENSMUSG00000027303	Ptpra	Protein-tyrosine phosphatase, active site||Receptor tyrosine-protein phosphatase alpha||Tyrosine specific protein phosphatases domain||Receptor tyrosine-protein phosphatase, alpha/epsilon-type||PTP type protein phosphatase||Protein-tyrosine phosphatase-like||Protein-tyrosine phosphatase, catalytic	0.992104	1.42908e-07
ENSMUST00000184605.7	ENSMUSG00000098747.7	Gm27216	Annotated_lncRNA	ENSMUST00000010049	ENSMUSG00000009905	Kdsr	Short-chain dehydrogenase/reductase, conserved site||Glucose/ribitol dehydrogenase||Short-chain dehydrogenase/reductase SDR	0.978565	4.64939e-06
ENSMUST00000184605.7	ENSMUSG00000098747.7	Gm27216	Annotated_lncRNA	ENSMUST00000023361	ENSMUSG00000022680	Pdxdc1	Pyridoxal phosphate-dependent decarboxylase||Pyridoxal phosphate-dependent transferase	0.970616	1.39148e-05
ENSMUST00000184605.7	ENSMUSG00000098747.7	Gm27216	Annotated_lncRNA	ENSMUST00000009003	ENSMUSG00000008859	Rala	Small GTPase superfamily, Rab type||Small GTPase superfamily, Ras type||Small GTP-binding protein domain||P-loop containing nucleoside triphosphate hydrolase||Small GTPase superfamily||Small GTPase superfamily, Rho type||Ran GTPase	0.95578	5.73303e-05
ENSMUST00000184605.7	ENSMUSG00000098747.7	Gm27216	Annotated_lncRNA	ENSMUST00000103108	ENSMUSG00000035112	Wnk4	Protein kinase-like domain||-||Serine/threonine/dual specificity protein kinase, catalytic domain||Serine/threonine-protein kinase, active site||Protein kinase domain||Serine/threonine-protein kinase OSR1/WNK, CCT domain	-0.957082	5.17023e-05
ENSMUST00000184605.7	ENSMUSG00000098747.7	Gm27216	Annotated_lncRNA	ENSMUST00000079869	ENSMUSG00000058446	Znrf2	-||Zinc finger, RING-type	0.962581	3.21706e-05
ENSMUST00000184605.7	ENSMUSG00000098747.7	Gm27216	Annotated_lncRNA	ENSMUST00000063042	ENSMUSG00000045594	Glb1	Glycoside hydrolase, family 35, conserved site||Beta-galactosidase 1-like||Glycoside hydrolase, family 35||Galactose-binding domain-like||Glycoside hydrolase 35, catalytic domain||Glycoside hydrolase superfamily	0.973616	9.57234e-06
ENSMUST00000184605.7	ENSMUSG00000098747.7	Gm27216	Annotated_lncRNA	ENSMUST00000049185	ENSMUSG00000033126	Ybey	Endoribonuclease YbeY, conserved site||Endoribonuclease YbeY	0.967219	2.03373e-05
ENSMUST00000184605.7	ENSMUSG00000098747.7	Gm27216	Annotated_lncRNA	ENSMUST00000169314	ENSMUSG00000058258	Idi1	NUDIX hydrolase domain||NUDIX hydrolase domain-like||Isopentenyl-diphosphate delta-isomerase, type 1	0.963791	2.87069e-05
ENSMUST00000184605.7	ENSMUSG00000098747.7	Gm27216	Annotated_lncRNA	ENSMUST00000022429	ENSMUSG00000021877	Arf4	Small GTPase superfamily, SAR1-type||P-loop containing nucleoside triphosphate hydrolase||Small GTPase superfamily, ARF/SAR type||Small GTP-binding protein domain||Small GTPase superfamily, Rab type||Small GTPase superfamily, ARF type	0.972411	1.11787e-05
ENSMUST00000184605.7	ENSMUSG00000098747.7	Gm27216	Annotated_lncRNA	ENSMUST00000169729	ENSMUSG00000023942	Slc29a1	Equilibrative nucleoside transporter||-||Major facilitator superfamily domain	-0.975786	7.10428e-06
ENSMUST00000184605.7	ENSMUSG00000098747.7	Gm27216	Annotated_lncRNA	ENSMUST00000145841	ENSMUSG00000028713	Cyp4b1	Cytochrome P450, E-class, group I||Cytochrome P450, conserved site||Cytochrome P450||Cytochrome P450, E-class, group II	0.954602	6.27832e-05
ENSMUST00000184605.7	ENSMUSG00000098747.7	Gm27216	Annotated_lncRNA	ENSMUST00000114547	ENSMUSG00000032076	Cadm1	CD80-like, immunoglobulin C2-set||Immunoglobulin-like domain||Immunoglobulin subtype 2||Immunoglobulin subtype||Immunoglobulin V-set domain||Neurexin/syndecan/glycophorin C	0.985796	1.10895e-06
ENSMUST00000184605.7	ENSMUSG00000098747.7	Gm27216	Annotated_lncRNA	ENSMUST00000149983	ENSMUSG00000028124	Gclm	-||NADP-dependent oxidoreductase domain	0.954092	6.52535e-05
ENSMUST00000184605.7	ENSMUSG00000098747.7	Gm27216	Annotated_lncRNA	ENSMUST00000168529	ENSMUSG00000032872	Cyb5r4	Riboflavin synthase-like beta-barrel||Ferredoxin reductase-type FAD-binding domain||Oxidoreductase, FAD-binding domain||Oxidoreductase FAD/NAD(P)-binding||HSP20-like chaperone||Cytochrome b5, heme-binding site||NADH:cytochrome b5 reductase (CBR)||Cytochrome b5-like heme/steroid binding domain||CS domain	0.962283	3.30676e-05
ENSMUST00000184605.7	ENSMUSG00000098747.7	Gm27216	Annotated_lncRNA	ENSMUST00000029968	ENSMUSG00000028292	Rars2	DALR anticodon binding||Aminoacyl-tRNA synthetase, class 1a, anticodon-binding||Arginine-tRNA ligase||-||Aminoacyl-tRNA synthetase, class I, conserved site||Arginyl tRNA synthetase N-terminal domain	0.966787	2.12819e-05
ENSMUST00000184605.7	ENSMUSG00000098747.7	Gm27216	Annotated_lncRNA	ENSMUST00000043598	ENSMUSG00000038217	Tlcd2	TRAM/LAG1/CLN8 homology domain	0.990993	2.26378e-07
ENSMUST00000184605.7	ENSMUSG00000098747.7	Gm27216	Annotated_lncRNA	ENSMUST00000107049	ENSMUSG00000028088	Fmo5	Flavin monooxygenase-like||Flavin monooxygenase FMO||Dimethylaniline monooxygenase, N-oxide-forming||Flavin monooxygenase (FMO) 5	0.955998	5.63612e-05
ENSMUST00000184605.7	ENSMUSG00000098747.7	Gm27216	Annotated_lncRNA	ENSMUST00000047815	ENSMUSG00000039463	Slc9a8	Na+/H+ exchanger||Cation/H+ exchanger	0.952276	7.46073e-05
ENSMUST00000184605.7	ENSMUSG00000098747.7	Gm27216	Annotated_lncRNA	ENSMUST00000112132	ENSMUSG00000030359	Pzp	Alpha-macroglobulin, receptor-binding||Alpha-macroglobulin complement component||Alpha-2-macroglobulin, N-terminal||Alpha-2-macroglobulin, conserved site||Alpha-2-macroglobulin, N-terminal 2||Alpha-2-macroglobulin, thiol-ester bond-forming||Terpenoid cyclases/protein prenyltransferase alpha-alpha toroid||Immunoglobulin E-set||Alpha-2-macroglobulin	0.976921	6.01177e-06
ENSMUST00000184605.7	ENSMUSG00000098747.7	Gm27216	Annotated_lncRNA	ENSMUST00000077290	ENSMUSG00000025823	Pdia4	Thioredoxin, conserved site||Protein disulphide isomerase||Thioredoxin domain||Disulphide isomerase||Protein disulphide-isomerase A4||Thioredoxin-like fold	0.951183	8.06754e-05
ENSMUST00000184605.7	ENSMUSG00000098747.7	Gm27216	Annotated_lncRNA	ENSMUST00000034178	ENSMUSG00000031725	Ces1f	Alpha/Beta hydrolase fold||Carboxylesterase type B, conserved site||Carboxylesterase type B, active site||-||Carboxylesterase, type B	0.98525	1.2649e-06
ENSMUST00000184605.7	ENSMUSG00000098747.7	Gm27216	Annotated_lncRNA	ENSMUST00000077353	ENSMUSG00000032126	Hmbs	Porphobilinogen deaminase, C-terminal||Porphobilinogen deaminase, N-terminal||Porphobilinogen deaminase, dipyrromethane cofactor binding site||Porphobilinogen deaminase	0.953308	6.91821e-05
ENSMUST00000184605.7	ENSMUSG00000098747.7	Gm27216	Annotated_lncRNA	ENSMUST00000102632	ENSMUSG00000068747	Sort1	VPS10	-0.969468	1.58926e-05
ENSMUST00000184605.7	ENSMUSG00000098747.7	Gm27216	Annotated_lncRNA	ENSMUST00000016631	ENSMUSG00000016487	Ppfibp1	Sterile alpha motif domain||-||Sterile alpha motif/pointed domain	0.961119	3.6737e-05
ENSMUST00000184605.7	ENSMUSG00000098747.7	Gm27216	Annotated_lncRNA	ENSMUST00000094646	ENSMUSG00000009907	Vps4b	AAA+ ATPase domain||Vps4 oligomerisation, C-terminal||P-loop containing nucleoside triphosphate hydrolase||ATPase, AAA-type, conserved site||MIT||ATPase, AAA-type, core	0.958631	4.55323e-05
ENSMUST00000184605.7	ENSMUSG00000098747.7	Gm27216	Annotated_lncRNA	ENSMUST00000029810	ENSMUSG00000053897	Slc39a8	Zinc/iron permease	0.952935	7.11089e-05
ENSMUST00000184605.7	ENSMUSG00000098747.7	Gm27216	Annotated_lncRNA	ENSMUST00000046383	ENSMUSG00000039304	Tnfsf10	Tumour necrosis factor domain||Tumour necrosis factor ligand 10/11||Tumour necrosis factor-like domain||Tumour necrosis factor, conserved site	0.953787	6.67613e-05
ENSMUST00000184605.7	ENSMUSG00000098747.7	Gm27216	Annotated_lncRNA	ENSMUST00000047702	ENSMUSG00000038304	Cd160	Immunoglobulin V-set domain||Immunoglobulin subtype||Immunoglobulin-like domain	0.97255	1.09845e-05
ENSMUST00000184605.7	ENSMUSG00000098747.7	Gm27216	Annotated_lncRNA	ENSMUST00000063814	ENSMUSG00000052102	Gnpda1	Glucosamine/galactosamine-6-phosphate isomerase||Glucosamine-6-phosphate isomerase||Glucosamine-6-phosphate isomerase, conserved site	0.975365	7.5427e-06
ENSMUST00000184605.7	ENSMUSG00000098747.7	Gm27216	Annotated_lncRNA	ENSMUST00000081440	ENSMUSG00000030340	Scnn1a	Na+ channel, amiloride-sensitive, conserved site||Epithelial sodium channel||Na+ channel, amiloride-sensitive	-0.951918	7.65603e-05
ENSMUST00000184605.7	ENSMUSG00000098747.7	Gm27216	Annotated_lncRNA	ENSMUST00000096495	ENSMUSG00000064127	Med14	Mediator complex, subunit Med14||-	0.968874	1.6992e-05
ENSMUST00000184605.7	ENSMUSG00000098747.7	Gm27216	Annotated_lncRNA	ENSMUST00000027131	ENSMUSG00000025986	Slc39a10	Zinc/iron permease||-	0.972936	1.0458e-05
ENSMUST00000184605.7	ENSMUSG00000098747.7	Gm27216	Annotated_lncRNA	ENSMUST00000023559	ENSMUSG00000022853	Ehhadh	3-hydroxyacyl-CoA dehydrogenase, C-terminal||6-phosphogluconate dehydrogenase C-terminal domain-like||Crotonase superfamily||Enoyl-CoA hydratase/isomerase, conserved site||ClpP/crotonase-like domain||3-hydroxyacyl-CoA dehydrogenase, conserved site||3-hydroxyacyl-CoA dehydrogenase, NAD binding	0.982733	2.1904e-06
ENSMUST00000184605.7	ENSMUSG00000098747.7	Gm27216	Annotated_lncRNA	ENSMUST00000115118	ENSMUSG00000031095	Cul4b	Cullin homology||Cullin, N-terminal||Cullin protein, neddylation domain||Cullin repeat-like-containing domain||Cullin, conserved site	0.954985	6.09727e-05
ENSMUST00000184605.7	ENSMUSG00000098747.7	Gm27216	Annotated_lncRNA	ENSMUST00000002502	ENSMUSG00000002428	Hltf	Zinc finger, RING-type||Helicase, C-terminal||Zinc finger, RING-type, conserved site||P-loop containing nucleoside triphosphate hydrolase||SNF2-related, N-terminal domain||Helicase superfamily 1/2, ATP-binding domain||HIRAN domain	0.979839	3.75632e-06
ENSMUST00000184605.7	ENSMUSG00000098747.7	Gm27216	Annotated_lncRNA	ENSMUST00000021273	ENSMUSG00000020894	Vamp2	Synaptobrevin/Vesicle-associated membrane protein||Synaptobrevin	-0.953447	6.84765e-05
ENSMUST00000184605.7	ENSMUSG00000098747.7	Gm27216	Annotated_lncRNA	ENSMUST00000034285	ENSMUSG00000031827	Cotl1	Actin-depolymerising factor homology domain	-0.955469	5.87351e-05
ENSMUST00000187882.1	ENSMUSG00000099669.1	Gm29012	Annotated_lncRNA	ENSMUST00000032402	ENSMUSG00000030268	Bcat1	Aminotransferase class IV||Aminotransferase, class IV, conserved site||Branched-chain amino acid aminotransferase II	0.962862	3.13415e-05
ENSMUST00000187882.1	ENSMUSG00000099669.1	Gm29012	Annotated_lncRNA	ENSMUST00000001806	ENSMUSG00000001755	Coasy	P-loop containing nucleoside triphosphate hydrolase||Cytidyltransferase-like domain||Dephospho-CoA kinase	0.958057	4.77512e-05
ENSMUST00000187882.1	ENSMUSG00000099669.1	Gm29012	Annotated_lncRNA	ENSMUST00000107302	ENSMUSG00000017801	Mlx	Myc-type, basic helix-loop-helix (bHLH) domain	0.97257	1.09566e-05
ENSMUST00000187882.1	ENSMUSG00000099669.1	Gm29012	Annotated_lncRNA	ENSMUST00000003268	ENSMUSG00000003200	Sh3gl1	SH3 domain||BAR domain	-0.975455	7.44744e-06
ENSMUST00000187882.1	ENSMUSG00000099669.1	Gm29012	Annotated_lncRNA	ENSMUST00000040498	ENSMUSG00000036492	Rnf39	Butyrophylin-like||SPRY domain||Zinc finger, RING-type||Concanavalin A-like lectin/glucanase domain||SPRY-associated||Zinc finger, C3HC4 RING-type||B30.2/SPRY domain||Zinc finger, RING-type, conserved site	0.95867	4.53819e-05
ENSMUST00000187882.1	ENSMUSG00000099669.1	Gm29012	Annotated_lncRNA	ENSMUST00000124259	ENSMUSG00000006345	Ggt1	Nucleophile aminohydrolases, N-terminal||Gamma-glutamyltranspeptidase||-	0.970569	1.39922e-05
ENSMUST00000187882.1	ENSMUSG00000099669.1	Gm29012	Annotated_lncRNA	ENSMUST00000038942	ENSMUSG00000042613	Pbxip1	-	-0.955401	5.90458e-05
ENSMUST00000187882.1	ENSMUSG00000099669.1	Gm29012	Annotated_lncRNA	ENSMUST00000025357	ENSMUSG00000024480	Ap3s1	AP complex, mu/sigma subunit||Clathrin adaptor complex, small chain||Adaptor protein complex, sigma subunit||Longin-like domain	0.960853	3.76133e-05
ENSMUST00000187882.1	ENSMUSG00000099669.1	Gm29012	Annotated_lncRNA	ENSMUST00000142166	ENSMUSG00000020839	Tmigd1	Immunoglobulin subtype||Immunoglobulin I-set||Immunoglobulin-like domain||Immunoglobulin subtype 2	0.952395	7.39679e-05
ENSMUST00000187882.1	ENSMUSG00000099669.1	Gm29012	Annotated_lncRNA	ENSMUST00000022954	ENSMUSG00000022332	Khdrbs3	K Homology domain, type 1||K Homology domain	0.954837	6.16674e-05
ENSMUST00000187882.1	ENSMUSG00000099669.1	Gm29012	Annotated_lncRNA	ENSMUST00000078386	ENSMUSG00000045871	Slitrk6	Cysteine-rich flanking region, C-terminal||Leucine-rich repeat||Leucine-rich repeat, typical subtype	0.982007	2.52807e-06
ENSMUST00000187882.1	ENSMUSG00000099669.1	Gm29012	Annotated_lncRNA	ENSMUST00000131804	ENSMUSG00000031441	Atp11a	P-type ATPase, A domain||P-type ATPase, phosphorylation site||-||P-type ATPase, cytoplasmic domain N||P-type ATPase, subfamily IV||P-type ATPase||HAD-like domain	0.952221	7.49066e-05
ENSMUST00000187882.1	ENSMUSG00000099669.1	Gm29012	Annotated_lncRNA	ENSMUST00000003561	ENSMUSG00000003469	Phyhip	Fibronectin type III	-0.96437	2.71484e-05
ENSMUST00000187882.1	ENSMUSG00000099669.1	Gm29012	Annotated_lncRNA	ENSMUST00000055052	ENSMUSG00000061825	Ces2c	Alpha/Beta hydrolase fold||Carboxylesterase type B, active site||Carboxylesterase, type B||Carboxylesterase type B, conserved site	0.950046	8.73466e-05
ENSMUST00000187882.1	ENSMUSG00000099669.1	Gm29012	Annotated_lncRNA	ENSMUST00000082235	ENSMUSG00000024313	Mep1b	Concanavalin A-like lectin/glucanase domain||EGF-like domain||Peptidase, metallopeptidase||MATH/TRAF domain||Peptidase M12A, astacin||MAM domain||TRAF-like||Meprin alpha/beta subunit	0.972236	1.14271e-05
ENSMUST00000187882.1	ENSMUSG00000099669.1	Gm29012	Annotated_lncRNA	ENSMUST00000095899	ENSMUSG00000096054	Syne1	Spectrin repeat||Actinin-type actin-binding domain, conserved site||Spectrin/alpha-actinin||Calponin homology domain||KASH domain	-0.956165	5.5623e-05
ENSMUST00000187882.1	ENSMUSG00000099669.1	Gm29012	Annotated_lncRNA	ENSMUST00000036236	ENSMUSG00000038388	Mpp6	L27 domain||SH3 domain||Guanylate kinase, conserved site||P-loop containing nucleoside triphosphate hydrolase||PDZ domain||L27 domain, C-terminal||Guanylate kinase/L-type calcium channel beta subunit||Variant SH3 domain||Guanylate kinase-like domain	0.957843	4.86005e-05
ENSMUST00000187882.1	ENSMUSG00000099669.1	Gm29012	Annotated_lncRNA	ENSMUST00000106098	ENSMUSG00000025477	Inpp5a	Inositol polyphosphate-related phosphatase||Endonuclease/exonuclease/phosphatase	-0.950821	8.27591e-05
ENSMUST00000187882.1	ENSMUSG00000099669.1	Gm29012	Annotated_lncRNA	ENSMUST00000066279	ENSMUSG00000036206	Sh3bp4	Variant SH3 domain||ZU5 domain||SH3 domain	-0.954285	6.43122e-05
ENSMUST00000187882.1	ENSMUSG00000099669.1	Gm29012	Annotated_lncRNA	ENSMUST00000107868	ENSMUSG00000020541	Tom1l1	GAT domain||ENTH/VHS||VHS subgroup||Target of Myb protein 1||VHS domain	0.955358	5.92428e-05
ENSMUST00000187882.1	ENSMUSG00000099669.1	Gm29012	Annotated_lncRNA	ENSMUST00000110690	ENSMUSG00000022186	Oxct1	Coenzyme A transferase family I||3-oxoacid CoA-transferase, subunit A||3-oxoacid CoA-transferase||Coenzyme A transferase binding site||3-oxoacid CoA-transferase, subunit B||Coenzyme A transferase active site	0.955577	5.82449e-05
ENSMUST00000187882.1	ENSMUSG00000099669.1	Gm29012	Annotated_lncRNA	ENSMUST00000034140	ENSMUSG00000031703	Itfg1	-	0.963006	3.09234e-05
ENSMUST00000187882.1	ENSMUSG00000099669.1	Gm29012	Annotated_lncRNA	ENSMUST00000110698	ENSMUSG00000055737	Ghr	Growth hormone/erythropoietin receptor, ligand binding||Growth hormone-binding protein||Fibronectin type III||Long hematopoietin receptor, single chain, conserved site	0.984256	1.58778e-06
ENSMUST00000187882.1	ENSMUSG00000099669.1	Gm29012	Annotated_lncRNA	ENSMUST00000101429	ENSMUSG00000029810	Tmem176b	CD20-like family	0.960807	3.77658e-05
ENSMUST00000187882.1	ENSMUSG00000099669.1	Gm29012	Annotated_lncRNA	ENSMUST00000020255	ENSMUSG00000020062	Slc5a8	Sodium/solute symporter||Sodium/solute symporter, subgroup	0.963456	2.96402e-05
ENSMUST00000187882.1	ENSMUSG00000099669.1	Gm29012	Annotated_lncRNA	ENSMUST00000020258	ENSMUSG00000020064	Herc4	HECT domain||Regulator of chromosome condensation 1/beta-lactamase-inhibitor protein II||Regulator of chromosome condensation, RCC1	0.976089	6.7995e-06
ENSMUST00000187882.1	ENSMUSG00000099669.1	Gm29012	Annotated_lncRNA	ENSMUST00000028426	ENSMUSG00000027035	Cers6	TRAM/LAG1/CLN8 homology domain||Homeobox domain||Homeodomain-like||Ceramide synthase component Lag1/Lac1	0.955864	5.69538e-05
ENSMUST00000187882.1	ENSMUSG00000099669.1	Gm29012	Annotated_lncRNA	ENSMUST00000019734	ENSMUSG00000019590	Cyb561	Cytochrome b561/ferric reductase transmembrane||Cytochrome b561 domain	0.951123	8.1018e-05
ENSMUST00000187882.1	ENSMUSG00000099669.1	Gm29012	Annotated_lncRNA	ENSMUST00000045748	ENSMUSG00000035232	Pdk3	Histidine kinase domain||Histidine kinase-like ATPase, C-terminal domain||Branched-chain alpha-ketoacid dehydrogenase kinase/Pyruvate dehydrogenase kinase, N-terminal	0.965535	2.4194e-05
ENSMUST00000187882.1	ENSMUSG00000099669.1	Gm29012	Annotated_lncRNA	ENSMUST00000163610	ENSMUSG00000025487	Psmd13	-||Proteasome component (PCI) domain	0.957197	5.12245e-05
ENSMUST00000187882.1	ENSMUSG00000099669.1	Gm29012	Annotated_lncRNA	ENSMUST00000099441	ENSMUSG00000033114	Slc35d2	Sugar phosphate transporter domain	0.961553	3.53369e-05
ENSMUST00000187882.1	ENSMUSG00000099669.1	Gm29012	Annotated_lncRNA	ENSMUST00000199754	ENSMUSG00000042390	Gatad2b	Zinc finger, GATA-type	-0.95134	7.97818e-05
ENSMUST00000187882.1	ENSMUSG00000099669.1	Gm29012	Annotated_lncRNA	ENSMUST00000115481	ENSMUSG00000064127	Med14	Mediator complex, subunit Med14||-	0.951579	7.84392e-05
ENSMUST00000187882.1	ENSMUSG00000099669.1	Gm29012	Annotated_lncRNA	ENSMUST00000033839	ENSMUSG00000031458	Coprs	Coordinator of PRMT5 and differentiation stimulator	0.985135	1.2997e-06
ENSMUST00000187882.1	ENSMUSG00000099669.1	Gm29012	Annotated_lncRNA	ENSMUST00000046515	ENSMUSG00000027698	Nceh1	Alpha/beta hydrolase fold-3||-||Alpha/Beta hydrolase fold||Arylacetamide deacetylase||Lipase, GDXG, active site	0.968712	1.73017e-05
ENSMUST00000187882.1	ENSMUSG00000099669.1	Gm29012	Annotated_lncRNA	ENSMUST00000035890	ENSMUSG00000041052	Slc7a13	Amino acid/polyamine transporter I	0.977102	5.84961e-06
ENSMUST00000187882.1	ENSMUSG00000099669.1	Gm29012	Annotated_lncRNA	ENSMUST00000127380	ENSMUSG00000079334	Nat6	Acyl-CoA N-acyltransferase||GNAT domain	0.953289	6.92833e-05
ENSMUST00000187882.1	ENSMUSG00000099669.1	Gm29012	Annotated_lncRNA	ENSMUST00000002145	ENSMUSG00000002076	Hsf2bp	-||Armadillo-type fold	0.959826	4.1139e-05
ENSMUST00000187882.1	ENSMUSG00000099669.1	Gm29012	Annotated_lncRNA	ENSMUST00000031051	ENSMUSG00000029161	Cgref1	EF-Hand 1, calcium-binding site||EF-hand domain||EF-hand domain pair	0.95478	6.19357e-05
ENSMUST00000187882.1	ENSMUSG00000099669.1	Gm29012	Annotated_lncRNA	ENSMUST00000012580	ENSMUSG00000027615	Hps3	Hermansky-Pudlak syndrome 3 protein||Hermansky-Pudlak syndrome 3 protein, C-terminal domain||Hermansky-Pudlak syndrome 3, central region||Hermansky-Pudlak syndrome 3 protein, N-terminal domain	0.971806	1.20533e-05
ENSMUST00000187882.1	ENSMUSG00000099669.1	Gm29012	Annotated_lncRNA	ENSMUST00000022296	ENSMUSG00000021774	Ube2e1	Ubiquitin-conjugating enzyme, active site||Ubiquitin-conjugating enzyme E2||Ubiquitin-conjugating enzyme/RWD-like	0.973057	1.02966e-05
ENSMUST00000187882.1	ENSMUSG00000099669.1	Gm29012	Annotated_lncRNA	ENSMUST00000109916	ENSMUSG00000068130	Zfp442	Zinc finger, C2H2||Krueppel-associated box||Zinc finger, C2H2-like	0.979097	4.25978e-06
ENSMUST00000187882.1	ENSMUSG00000099669.1	Gm29012	Annotated_lncRNA	ENSMUST00000167085	ENSMUSG00000038305	Spats2l	UBA-like||Protein of unknown function DUF1387	0.972387	1.12131e-05
ENSMUST00000187882.1	ENSMUSG00000099669.1	Gm29012	Annotated_lncRNA	ENSMUST00000071728	ENSMUSG00000029822	Osbpl3	-||Oxysterol-binding protein, conserved site||Pleckstrin homology domain||Oxysterol-binding protein	0.974769	8.19659e-06
ENSMUST00000187882.1	ENSMUSG00000099669.1	Gm29012	Annotated_lncRNA	ENSMUST00000105701	ENSMUSG00000028979	Masp2	Sushi/SCR/CCP domain||Peptidase S1A, chymotrypsin-type||Peptidase S1, PA clan||EGF-like, conserved site||Peptidase S1, trypsin family, active site||Peptidase S1A, complement C1r/C1S/mannan-binding||CUB domain||EGF-like domain||EGF-like calcium-binding, conserved site||EGF-like calcium-binding domain||Serine proteases, trypsin domain||EGF-type aspartate/asparagine hydroxylation site	0.974573	8.41998e-06
ENSMUST00000187882.1	ENSMUSG00000099669.1	Gm29012	Annotated_lncRNA	ENSMUST00000069597	ENSMUSG00000073563	Csnk1g3	Protein kinase domain||Serine/threonine-protein kinase, active site||Protein kinase, ATP binding site||Casein kinase 1 gamma C-terminal||Serine/threonine/dual specificity protein kinase, catalytic domain||Protein kinase-like domain	0.956244	5.52789e-05
ENSMUST00000187882.1	ENSMUSG00000099669.1	Gm29012	Annotated_lncRNA	ENSMUST00000179433	ENSMUSG00000037263	Aldh3b3	-||Aldehyde dehydrogenase, glutamic acid active site||Aldehyde/histidinol dehydrogenase||Aldehyde dehydrogenase, cysteine active site||Aldehyde dehydrogenase domain||Aldehyde dehydrogenase NAD(P)-dependent	0.968515	1.7682e-05
ENSMUST00000187882.1	ENSMUSG00000099669.1	Gm29012	Annotated_lncRNA	ENSMUST00000001963	ENSMUSG00000020681	Ace	Peptidase M2, peptidyl-dipeptidase A	0.978669	4.57115e-06
ENSMUST00000187882.1	ENSMUSG00000099669.1	Gm29012	Annotated_lncRNA	ENSMUST00000099705	ENSMUSG00000075033	Nxpe3	Neurexophilin/NXPE||Immunoglobulin E-set	0.976467	6.43357e-06
ENSMUST00000187882.1	ENSMUSG00000099669.1	Gm29012	Annotated_lncRNA	ENSMUST00000166161	ENSMUSG00000064179	Tnnt1	-||Troponin	0.967234	2.0306e-05
ENSMUST00000187882.1	ENSMUSG00000099669.1	Gm29012	Annotated_lncRNA	ENSMUST00000034267	ENSMUSG00000031808	Slc27a1	AMP-binding enzyme C-terminal domain||AMP-binding, conserved site||AMP-dependent synthetase/ligase	-0.968282	1.81406e-05
ENSMUST00000187882.1	ENSMUSG00000099669.1	Gm29012	Annotated_lncRNA	ENSMUST00000121992	ENSMUSG00000031549	Ido2	Indoleamine 2,3-dioxygenase	0.966777	2.13044e-05
ENSMUST00000187882.1	ENSMUSG00000099669.1	Gm29012	Annotated_lncRNA	ENSMUST00000034547	ENSMUSG00000032047	Acat1	Thiolase, conserved site||Thiolase||Thiolase-like||Thiolase, C-terminal||Thiolase, active site||Thiolase, acyl-enzyme intermediate active site||Thiolase, N-terminal	0.9733	9.97635e-06
ENSMUST00000187882.1	ENSMUSG00000099669.1	Gm29012	Annotated_lncRNA	ENSMUST00000136158	ENSMUSG00000030759	Far1	Fatty acyl-CoA reductase||Male sterility, NAD-binding	0.97842	4.7596e-06
ENSMUST00000187882.1	ENSMUSG00000099669.1	Gm29012	Annotated_lncRNA	ENSMUST00000044138	ENSMUSG00000037347	Chst7	Sulfotransferase domain||Carbohydrate sulfotransferase||P-loop containing nucleoside triphosphate hydrolase	0.980592	3.29021e-06
ENSMUST00000187882.1	ENSMUSG00000099669.1	Gm29012	Annotated_lncRNA	ENSMUST00000162366	ENSMUSG00000029207	Apbb2	WW domain||PTB/PI domain||-	0.952375	7.40742e-05
ENSMUST00000187882.1	ENSMUSG00000099669.1	Gm29012	Annotated_lncRNA	ENSMUST00000120522	ENSMUSG00000053303	Slc22a26	Major facilitator superfamily domain||Major facilitator, sugar transporter-like	0.991408	1.91951e-07
ENSMUST00000187882.1	ENSMUSG00000099669.1	Gm29012	Annotated_lncRNA	ENSMUST00000070004	ENSMUSG00000031958	Ldhd	FAD linked oxidase, N-terminal||FAD-linked oxidase-like, C-terminal||FAD-binding, type 2||FAD-linked oxidase, C-terminal	0.961294	3.61653e-05
ENSMUST00000187882.1	ENSMUSG00000099669.1	Gm29012	Annotated_lncRNA	ENSMUST00000086195	ENSMUSG00000066797	Zfp648	Zinc finger, C2H2-like||Zinc finger, C2H2	-0.95296	7.09786e-05
ENSMUST00000187882.1	ENSMUSG00000099669.1	Gm29012	Annotated_lncRNA	ENSMUST00000106696	ENSMUSG00000020604	Arsg	Alkaline-phosphatase-like, core domain||Sulfatase||Sulfatase, conserved site	0.954457	6.3476e-05
ENSMUST00000187882.1	ENSMUSG00000099669.1	Gm29012	Annotated_lncRNA	ENSMUST00000034945	ENSMUSG00000032381	Fam96a	Domain of unknown function DUF59	0.950559	8.429e-05
ENSMUST00000187882.1	ENSMUSG00000099669.1	Gm29012	Annotated_lncRNA	ENSMUST00000107359	ENSMUSG00000039270	Megf9	Laminin EGF domain||EGF-like domain	-0.953429	6.85667e-05
ENSMUST00000187882.1	ENSMUSG00000099669.1	Gm29012	Annotated_lncRNA	ENSMUST00000035007	ENSMUSG00000032434	Cmtm6	Marvel domain	0.962948	3.10916e-05
ENSMUST00000187882.1	ENSMUSG00000099669.1	Gm29012	Annotated_lncRNA	ENSMUST00000002274	ENSMUSG00000002204	Napsa	Aspartic peptidase, active site||Aspartic peptidase||Aspartic peptidase domain	0.961717	3.48167e-05
ENSMUST00000187882.1	ENSMUSG00000099669.1	Gm29012	Annotated_lncRNA	ENSMUST00000041768	ENSMUSG00000033715	Akr1c14	Aldo/keto reductase, conserved site||NADP-dependent oxidoreductase domain||Aldo/keto reductase subgroup	0.984133	1.63146e-06
ENSMUST00000187882.1	ENSMUSG00000099669.1	Gm29012	Annotated_lncRNA	ENSMUST00000090302	ENSMUSG00000040640	Erc2	Active zone protein ELKS	0.975474	7.42696e-06
ENSMUST00000187882.1	ENSMUSG00000099669.1	Gm29012	Annotated_lncRNA	ENSMUST00000029076	ENSMUSG00000027559	Car3	Carbonic anhydrase, alpha-class, conserved site||Alpha carbonic anhydrase	0.956577	5.3838e-05
ENSMUST00000187882.1	ENSMUSG00000099669.1	Gm29012	Annotated_lncRNA	ENSMUST00000156887	ENSMUSG00000026103	Gls	Ankyrin repeat-containing domain||Glutaminase||Ankyrin repeat||Beta-lactamase/transpeptidase-like	0.954615	6.27216e-05
ENSMUST00000187882.1	ENSMUSG00000099669.1	Gm29012	Annotated_lncRNA	ENSMUST00000043696	ENSMUSG00000038224	Serpinf2	-||Serpin domain||Serpin, conserved site	0.986889	8.38881e-07
ENSMUST00000187882.1	ENSMUSG00000099669.1	Gm29012	Annotated_lncRNA	ENSMUST00000162735	ENSMUSG00000021187	Tc2n	C2 domain	0.96584	2.34596e-05
ENSMUST00000187882.1	ENSMUSG00000099669.1	Gm29012	Annotated_lncRNA	ENSMUST00000171765	ENSMUSG00000024386	Proc	EGF-like domain||EGF-like calcium-binding, conserved site||EGF-like calcium-binding domain||EGF-type aspartate/asparagine hydroxylation site||Serine proteases, trypsin domain||EGF-like, conserved site||Peptidase S1, trypsin family, active site||Gamma-carboxyglutamic acid-rich (GLA) domain||Peptidase S1A, chymotrypsin-type||Peptidase S1, PA clan||Peptidase S1A, coagulation factor VII/IX/X/C/Z	0.967673	1.93773e-05
ENSMUST00000187882.1	ENSMUSG00000099669.1	Gm29012	Annotated_lncRNA	ENSMUST00000022791	ENSMUSG00000022184	Fbxo4	F-box domain	0.983046	2.05503e-06
ENSMUST00000187882.1	ENSMUSG00000099669.1	Gm29012	Annotated_lncRNA	ENSMUST00000126142	ENSMUSG00000061742	Slc22a12	Major facilitator superfamily domain||Major facilitator, sugar transporter-like	0.969689	1.54972e-05
ENSMUST00000187882.1	ENSMUSG00000099669.1	Gm29012	Annotated_lncRNA	ENSMUST00000006785	ENSMUSG00000021335	Slc17a1	-||Major facilitator superfamily||Major facilitator superfamily domain||Na-dependent inorganic phosphate cotransporter	0.971221	1.2944e-05
ENSMUST00000187882.1	ENSMUSG00000099669.1	Gm29012	Annotated_lncRNA	ENSMUST00000018246	ENSMUSG00000018102	Hist1h2bc	Histone H2A/H2B/H3||Histone-fold||Histone H2B	0.950251	8.61176e-05
ENSMUST00000187882.1	ENSMUSG00000099669.1	Gm29012	Annotated_lncRNA	ENSMUST00000029419	ENSMUSG00000027831	Veph1	Pleckstrin homology domain||Armadillo-type fold	0.952906	7.12622e-05
ENSMUST00000187882.1	ENSMUSG00000099669.1	Gm29012	Annotated_lncRNA	ENSMUST00000115443	ENSMUSG00000009376	Met	Protein kinase-like domain||-||Plexin repeat||Protein kinase, ATP binding site||Sema domain||Plexin-like fold||IPT domain||Immunoglobulin E-set||Tyrosine-protein kinase, HGF/MSP receptor||Tyrosine-protein kinase, catalytic domain||Serine-threonine/tyrosine-protein kinase catalytic domain||Tyrosine-protein kinase, active site||Protein kinase domain	0.976451	6.44835e-06
ENSMUST00000187882.1	ENSMUSG00000099669.1	Gm29012	Annotated_lncRNA	ENSMUST00000123930	ENSMUSG00000030268	Bcat1	Aminotransferase class IV||Aminotransferase, class IV, conserved site||Branched-chain amino acid aminotransferase II	0.976906	6.02539e-06
ENSMUST00000187882.1	ENSMUSG00000099669.1	Gm29012	Annotated_lncRNA	ENSMUST00000019068	ENSMUSG00000018924	Alox15	Lipoxygenase, conserved site||Lipoxygenase, iron binding site||Lipoxygenase, C-terminal||PLAT/LH2 domain||Lipoxygenase, mammalian	0.985874	1.08798e-06
ENSMUST00000187882.1	ENSMUSG00000099669.1	Gm29012	Annotated_lncRNA	ENSMUST00000100827	ENSMUSG00000030249	Abcc9	ABC transporter, conserved site||AAA+ ATPase domain||Sulphonylurea receptor||P-loop containing nucleoside triphosphate hydrolase||ABC transporter-like||ABC transporter type 1, transmembrane domain||ATP-binding cassette subfamily C member 9	0.963912	2.83771e-05
ENSMUST00000187882.1	ENSMUSG00000099669.1	Gm29012	Annotated_lncRNA	ENSMUST00000066091	ENSMUSG00000031681	Smad1	SMAD domain, Dwarfin-type||SMAD/FHA domain||MAD homology, MH1||MAD homology 1, Dwarfin-type	-0.953976	6.58266e-05
ENSMUST00000187882.1	ENSMUSG00000099669.1	Gm29012	Annotated_lncRNA	ENSMUST00000166467	ENSMUSG00000036083	Slc17a3	Major facilitator superfamily||Major facilitator superfamily domain||Sodium-dependent phosphate transport protein 4 , predicted	0.95577	5.73747e-05
ENSMUST00000187882.1	ENSMUSG00000099669.1	Gm29012	Annotated_lncRNA	ENSMUST00000118717	ENSMUSG00000033715	Akr1c14	Aldo/keto reductase, conserved site||NADP-dependent oxidoreductase domain||Aldo/keto reductase subgroup	0.978351	4.81241e-06
ENSMUST00000187882.1	ENSMUSG00000099669.1	Gm29012	Annotated_lncRNA	ENSMUST00000103061	ENSMUSG00000020610	Amz2	Peptidase M54, archaemetzincin	0.953158	6.99534e-05
ENSMUST00000187882.1	ENSMUSG00000099669.1	Gm29012	Annotated_lncRNA	ENSMUST00000191670	ENSMUSG00000027531	Impa1	Inositol monophosphatase, Lithium-sensitive||Inositol monophosphatase||Inositol monophosphatase, metal-binding site||Inositol monophosphatase, conserved site	0.977456	5.54109e-06
ENSMUST00000187882.1	ENSMUSG00000099669.1	Gm29012	Annotated_lncRNA	ENSMUST00000027650	ENSMUSG00000026399	Cd55	-||Sushi/SCR/CCP domain	0.967805	1.91033e-05
ENSMUST00000187882.1	ENSMUSG00000099669.1	Gm29012	Annotated_lncRNA	ENSMUST00000109679	ENSMUSG00000021612	Slc6a18	Sodium:neurotransmitter symporter||Sodium:neurotransmitter symporter, orphan	0.952284	7.45665e-05
ENSMUST00000187882.1	ENSMUSG00000099669.1	Gm29012	Annotated_lncRNA	ENSMUST00000030986	ENSMUSG00000029103	Lrpap1	Alpha-2-macroglobulin RAP, C-terminal||Alpha-2-macroglobulin receptor-associated protein, domain 1	0.956049	5.61334e-05
ENSMUST00000187882.1	ENSMUSG00000099669.1	Gm29012	Annotated_lncRNA	ENSMUST00000063770	ENSMUSG00000030935	Acsm3	AMP-binding enzyme C-terminal domain||AMP-binding, conserved site||AMP-dependent synthetase/ligase	0.95662	5.36543e-05
ENSMUST00000187882.1	ENSMUSG00000099669.1	Gm29012	Annotated_lncRNA	ENSMUST00000030306	ENSMUSG00000028572	Hook1	Hook-related protein family	-0.978717	4.53533e-06
ENSMUST00000187882.1	ENSMUSG00000099669.1	Gm29012	Annotated_lncRNA	ENSMUST00000030305	ENSMUSG00000028571	Cyp2j13	Cytochrome P450, E-class, group I, CYP2J-like||Cytochrome P450||Cytochrome P450, conserved site||Cytochrome P450, E-class, group I	0.971171	1.30225e-05
ENSMUST00000187882.1	ENSMUSG00000099669.1	Gm29012	Annotated_lncRNA	ENSMUST00000028250	ENSMUSG00000026887	Mrrf	Ribosome recycling factor domain||-	0.950715	8.33775e-05
ENSMUST00000187882.1	ENSMUSG00000099669.1	Gm29012	Annotated_lncRNA	ENSMUST00000032413	ENSMUSG00000030275	Etnk1	Protein kinase-like domain	-0.959285	4.30897e-05
ENSMUST00000187882.1	ENSMUSG00000099669.1	Gm29012	Annotated_lncRNA	ENSMUST00000034905	ENSMUSG00000032350	Gclc	Glutamate-cysteine ligase catalytic subunit	0.972555	1.09775e-05
ENSMUST00000187882.1	ENSMUSG00000099669.1	Gm29012	Annotated_lncRNA	ENSMUST00000053699	ENSMUSG00000035093	Secisbp2l	Ribosomal protein L7Ae/L30e/S12e/Gadd45||50S ribosomal protein L30e-like	0.955111	6.03835e-05
ENSMUST00000187882.1	ENSMUSG00000099669.1	Gm29012	Annotated_lncRNA	ENSMUST00000176030	ENSMUSG00000024921	Smarca2	Bromodomain||Glutamine-Leucine-Glutamine, QLQ||Bromodomain, conserved site||Helicase, C-terminal||Snf2 ATP coupling domain||P-loop containing nucleoside triphosphate hydrolase||Helicase superfamily 1/2, ATP-binding domain||Helicase/SANT-associated domain||BRK domain||SNF2-related, N-terminal domain||-	0.994566	3.87303e-08
ENSMUST00000187882.1	ENSMUSG00000099669.1	Gm29012	Annotated_lncRNA	ENSMUST00000015171	ENSMUSG00000015027	Galns	Sulfatase||Sulfatase, conserved site||Alkaline-phosphatase-like, core domain	0.974538	8.4603e-06
ENSMUST00000187882.1	ENSMUSG00000099669.1	Gm29012	Annotated_lncRNA	ENSMUST00000028807	ENSMUSG00000027332	Ivd	Acyl-CoA oxidase/dehydrogenase, central domain||Acyl-CoA dehydrogenase/oxidase C-terminal||Acyl-CoA dehydrogenase/oxidase, N-terminal||Acyl-CoA dehydrogenase, conserved site||Acyl-CoA dehydrogenase/oxidase, N-terminal and middle domain	0.973291	9.98908e-06
ENSMUST00000187882.1	ENSMUSG00000099669.1	Gm29012	Annotated_lncRNA	ENSMUST00000178826	ENSMUSG00000028124	Gclm	-||NADP-dependent oxidoreductase domain	0.97014	1.47126e-05
ENSMUST00000187882.1	ENSMUSG00000099669.1	Gm29012	Annotated_lncRNA	ENSMUST00000159584	ENSMUSG00000090061	Nwd2	-||P-loop containing nucleoside triphosphate hydrolase||WD40 repeat||Quinonprotein alcohol dehydrogenase-like superfamily||WD40 repeat, conserved site||WD40-repeat-containing domain	0.975821	7.06832e-06
ENSMUST00000187882.1	ENSMUSG00000099669.1	Gm29012	Annotated_lncRNA	ENSMUST00000061745	ENSMUSG00000050368	Hoxd10	Homeodomain, metazoa||Homeodomain-like||Homeobox domain||Homeobox, conserved site	-0.951872	7.68136e-05
ENSMUST00000187882.1	ENSMUSG00000099669.1	Gm29012	Annotated_lncRNA	ENSMUST00000030164	ENSMUSG00000028452	Vcp	P-loop containing nucleoside triphosphate hydrolase||CDC48, domain 2||AAA+ ATPase domain||ATPase, AAA-type, core||Vps4 oligomerisation, C-terminal||ATPase, AAA-type, conserved site||CDC48, N-terminal subdomain||Aspartate decarboxylase-like domain||CDC48 domain 2-like||AAA ATPase, CDC48 family	0.950279	8.59484e-05
ENSMUST00000187882.1	ENSMUSG00000099669.1	Gm29012	Annotated_lncRNA	ENSMUST00000197574	ENSMUSG00000002944	Cd36	Adhesion molecule CD36||CD36 antigen	0.97101	1.32776e-05
ENSMUST00000187882.1	ENSMUSG00000099669.1	Gm29012	Annotated_lncRNA	ENSMUST00000115628	ENSMUSG00000013539	Tango2	-||Transport and Golgi organisation protein 2	0.963929	2.83305e-05
ENSMUST00000187882.1	ENSMUSG00000099669.1	Gm29012	Annotated_lncRNA	ENSMUST00000047232	ENSMUSG00000042410	Agps	FAD-linked oxidase, C-terminal||FAD-linked oxidase-like, C-terminal||-||FAD linked oxidase, N-terminal||FAD-binding, type 2	0.974041	9.04816e-06
ENSMUST00000187882.1	ENSMUSG00000099669.1	Gm29012	Annotated_lncRNA	ENSMUST00000072729	ENSMUSG00000024675	Ms4a4c	CD20-like family||-	0.963616	2.91909e-05
ENSMUST00000187882.1	ENSMUSG00000099669.1	Gm29012	Annotated_lncRNA	ENSMUST00000132280	ENSMUSG00000020681	Ace	Peptidase M2, peptidyl-dipeptidase A	0.964876	2.58352e-05
ENSMUST00000187882.1	ENSMUSG00000099669.1	Gm29012	Annotated_lncRNA	ENSMUST00000115366	ENSMUSG00000024597	Slc12a2	Amino acid permease, N-terminal||Na/K/Cl co-transporter||SLC12A transporter family||Amino acid permease/ SLC12A domain||Na/K/Cl co-transporter 1	0.960458	3.89414e-05
ENSMUST00000187882.1	ENSMUSG00000099669.1	Gm29012	Annotated_lncRNA	ENSMUST00000113451	ENSMUSG00000061742	Slc22a12	Major facilitator superfamily domain||Major facilitator, sugar transporter-like	0.962849	3.13786e-05
ENSMUST00000187882.1	ENSMUSG00000099669.1	Gm29012	Annotated_lncRNA	ENSMUST00000025468	ENSMUSG00000024575	Pde6a	3'5'-cyclic nucleotide phosphodiesterase||GAF domain-like||3'5'-cyclic nucleotide phosphodiesterase, conserved site||GAF domain||HD/PDEase domain||3'5'-cyclic nucleotide phosphodiesterase, catalytic domain	0.953998	6.57172e-05
ENSMUST00000187882.1	ENSMUSG00000099669.1	Gm29012	Annotated_lncRNA	ENSMUST00000017821	ENSMUSG00000017677	Wsb1	WD40 repeat, conserved site||WD40-repeat-containing domain||SOCS box domain||-||WD40 repeat||G-protein beta WD-40 repeat	-0.956918	5.2389e-05
ENSMUST00000187882.1	ENSMUSG00000099669.1	Gm29012	Annotated_lncRNA	ENSMUST00000040489	ENSMUSG00000024727	Trpm6	Ion transport domain||Protein kinase-like domain||MHCK/EF2 kinase	-0.968581	1.75543e-05
ENSMUST00000187882.1	ENSMUSG00000099669.1	Gm29012	Annotated_lncRNA	ENSMUST00000021940	ENSMUSG00000021484	Lman2	Concanavalin A-like lectin/glucanase domain||Legume-like lectin	0.961186	3.65152e-05
ENSMUST00000187882.1	ENSMUSG00000099669.1	Gm29012	Annotated_lncRNA	ENSMUST00000061937	ENSMUSG00000028189	Ctbs	Glycoside hydrolase family 18, catalytic domain||Glycoside hydrolase, chitinase active site||Glycoside hydrolase superfamily||-||Chitinase II	0.962192	3.33437e-05
ENSMUST00000187882.1	ENSMUSG00000099669.1	Gm29012	Annotated_lncRNA	ENSMUST00000051906	ENSMUSG00000059708	Akap17b	-||RNA recognition motif domain	-0.953105	7.02295e-05
ENSMUST00000187882.1	ENSMUSG00000099669.1	Gm29012	Annotated_lncRNA	ENSMUST00000179472	ENSMUSG00000064036	Mro	Armadillo-type fold||-	0.954097	6.52281e-05
ENSMUST00000187882.1	ENSMUSG00000099669.1	Gm29012	Annotated_lncRNA	ENSMUST00000186294	ENSMUSG00000056763	Cspp1	-	0.965131	2.51929e-05
ENSMUST00000187882.1	ENSMUSG00000099669.1	Gm29012	Annotated_lncRNA	ENSMUST00000046743	ENSMUSG00000033488	BC026585	Alcohol dehydrogenase, C-terminal||Polyketide synthase, enoylreductase domain||-||Alcohol dehydrogenase, N-terminal||GroES-like	0.974593	8.3966e-06
ENSMUST00000187882.1	ENSMUSG00000099669.1	Gm29012	Annotated_lncRNA	ENSMUST00000043551	ENSMUSG00000040351	Ankib1	Ubiquitin interacting motif||IBR domain||Zinc finger, RING-type||Ankyrin repeat-containing domain||Ankyrin repeat	0.970047	1.48723e-05
ENSMUST00000187882.1	ENSMUSG00000099669.1	Gm29012	Annotated_lncRNA	ENSMUST00000022281	ENSMUSG00000016018	Skiv2l2	ATP-dependent RNA helicase Ski2, C-terminal||Helicase superfamily 1/2, ATP-binding domain||DEAD/DEAH box helicase domain||rRNA-processing arch domain||ATP-dependent RNA helicase Ski2||P-loop containing nucleoside triphosphate hydrolase||Helicase, C-terminal	0.981939	2.56142e-06
ENSMUST00000187882.1	ENSMUSG00000099669.1	Gm29012	Annotated_lncRNA	ENSMUST00000203945	ENSMUSG00000030247	Kcnj8	Immunoglobulin E-set||Potassium channel, inwardly rectifying, Kir||Potassium channel, inwardly rectifying, Kir6.1	0.967883	1.89444e-05
ENSMUST00000187882.1	ENSMUSG00000099669.1	Gm29012	Annotated_lncRNA	ENSMUST00000128757	ENSMUSG00000022679	Mpv17l	Mpv17/PMP22||-	0.952446	7.36931e-05
ENSMUST00000187882.1	ENSMUSG00000099669.1	Gm29012	Annotated_lncRNA	ENSMUST00000005003	ENSMUSG00000004880	Lbr	Ergosterol biosynthesis ERG4/ERG24||Sterol reductase, conserved site||Lamin-B receptor of TUDOR domain||Tudor domain	0.957047	5.1849e-05
ENSMUST00000187882.1	ENSMUSG00000099669.1	Gm29012	Annotated_lncRNA	ENSMUST00000114384	ENSMUSG00000070858	Gm1673	Neuropeptide-like protein||-	0.951368	7.96261e-05
ENSMUST00000187882.1	ENSMUSG00000099669.1	Gm29012	Annotated_lncRNA	ENSMUST00000078752	ENSMUSG00000060227	Casc4	GOLM1/CASC4 family||-	0.972358	1.12543e-05
ENSMUST00000187882.1	ENSMUSG00000099669.1	Gm29012	Annotated_lncRNA	ENSMUST00000046110	ENSMUSG00000026587	Astn1	Membrane attack complex component/perforin (MACPF) domain||EGF-like domain||-||Fibronectin type III	0.973451	9.78293e-06
ENSMUST00000187882.1	ENSMUSG00000099669.1	Gm29012	Annotated_lncRNA	ENSMUST00000120213	ENSMUSG00000031667	Aktip	Ubiquitin-conjugating enzyme E2||Ubiquitin-conjugating enzyme/RWD-like	0.951612	7.82568e-05
ENSMUST00000187882.1	ENSMUSG00000099669.1	Gm29012	Annotated_lncRNA	ENSMUST00000126322	ENSMUSG00000027610	Gss	Glutathione synthase, eukaryotic||Glutathione synthase, substrate-binding, eukaryotic||Pre-ATP-grasp domain	0.963124	3.05828e-05
ENSMUST00000187882.1	ENSMUSG00000099669.1	Gm29012	Annotated_lncRNA	ENSMUST00000023884	ENSMUSG00000023120	Gm853	Alanine racemase/group IV decarboxylase, C-terminal||Orn/DAP/Arg decarboxylase 2, C-terminal||Ornithine/DAP/Arg decarboxylase||Orn/DAP/Arg decarboxylase 2, conserved site||Orn/DAP/Arg decarboxylase 2, N-terminal||Orn/DAP/Arg decarboxylase 2, pyridoxal-phosphate binding site||PLP-binding barrel||Ornithine decarboxylase	0.956943	5.22823e-05
ENSMUST00000187882.1	ENSMUSG00000099669.1	Gm29012	Annotated_lncRNA	ENSMUST00000069695	ENSMUSG00000055912	Tmem150a	Frag1/DRAM/Sfk1	0.957707	4.91441e-05
ENSMUST00000187882.1	ENSMUSG00000099669.1	Gm29012	Annotated_lncRNA	ENSMUST00000123638	ENSMUSG00000030945	Acsm2	AMP-dependent synthetase/ligase||AMP-binding enzyme C-terminal domain||AMP-binding, conserved site	0.986461	9.38325e-07
ENSMUST00000187882.1	ENSMUSG00000099669.1	Gm29012	Annotated_lncRNA	ENSMUST00000022239	ENSMUSG00000021725	Parp8	Poly(ADP-ribose) polymerase, catalytic domain	0.974337	8.69402e-06
ENSMUST00000187882.1	ENSMUSG00000099669.1	Gm29012	Annotated_lncRNA	ENSMUST00000123128	ENSMUSG00000034593	Myo5a	Dilute domain||P-loop containing nucleoside triphosphate hydrolase||-||Myosin head, motor domain||IQ motif, EF-hand binding site||Myosin S1 fragment, N-terminal	0.981982	2.5401e-06
ENSMUST00000187882.1	ENSMUSG00000099669.1	Gm29012	Annotated_lncRNA	ENSMUST00000115227	ENSMUSG00000046598	Bdh1	Short-chain dehydrogenase/reductase, conserved site||Short-chain dehydrogenase/reductase SDR||Glucose/ribitol dehydrogenase	0.954886	6.14372e-05
ENSMUST00000187882.1	ENSMUSG00000099669.1	Gm29012	Annotated_lncRNA	ENSMUST00000074660	ENSMUSG00000031283	Chrdl1	VWFC domain	0.979614	3.90447e-06
ENSMUST00000187882.1	ENSMUSG00000099669.1	Gm29012	Annotated_lncRNA	ENSMUST00000065634	ENSMUSG00000053303	Slc22a26	Major facilitator superfamily domain||Major facilitator, sugar transporter-like	0.981765	2.64842e-06
ENSMUST00000187882.1	ENSMUSG00000099669.1	Gm29012	Annotated_lncRNA	ENSMUST00000086723	ENSMUSG00000024085	Man2a1	Glycoside hydrolase/deacetylase, beta/alpha-barrel||Glycoside hydrolase family 38, N-terminal domain||Glycoside hydrolase, family 38, central domain||Glycoside hydrolase, families 57/38, central domain||Galactose mutarotase-like domain||Glycosyl hydrolase family 38, C-terminal	-0.962604	3.21023e-05
ENSMUST00000187882.1	ENSMUSG00000099669.1	Gm29012	Annotated_lncRNA	ENSMUST00000000291	ENSMUSG00000000282	Mnt	Myc-type, basic helix-loop-helix (bHLH) domain	-0.957126	5.15211e-05
ENSMUST00000187882.1	ENSMUSG00000099669.1	Gm29012	Annotated_lncRNA	ENSMUST00000029766	ENSMUSG00000028121	Bcar3	SH2 domain||Ras guanine-nucleotide exchange factors catalytic domain||-	-0.988185	5.83475e-07
ENSMUST00000187882.1	ENSMUSG00000099669.1	Gm29012	Annotated_lncRNA	ENSMUST00000033915	ENSMUSG00000031517	Gpm6a	Myelin proteolipid protein PLP, conserved site||Myelin proteolipid protein PLP	0.963946	2.82858e-05
ENSMUST00000187882.1	ENSMUSG00000099669.1	Gm29012	Annotated_lncRNA	ENSMUST00000047885	ENSMUSG00000039480	Nt5dc1	HAD-like domain||HAD-superfamily hydrolase, subfamily IG, 5'-nucleotidase	0.969206	1.63722e-05
ENSMUST00000187882.1	ENSMUSG00000099669.1	Gm29012	Annotated_lncRNA	ENSMUST00000029769	ENSMUSG00000028124	Gclm	-||NADP-dependent oxidoreductase domain	0.97352	9.69412e-06
ENSMUST00000187882.1	ENSMUSG00000099669.1	Gm29012	Annotated_lncRNA	ENSMUST00000103108	ENSMUSG00000035112	Wnk4	Protein kinase-like domain||-||Serine/threonine/dual specificity protein kinase, catalytic domain||Serine/threonine-protein kinase, active site||Protein kinase domain||Serine/threonine-protein kinase OSR1/WNK, CCT domain	-0.95408	6.53138e-05
ENSMUST00000187882.1	ENSMUSG00000099669.1	Gm29012	Annotated_lncRNA	ENSMUST00000108246	ENSMUSG00000041058	Wwp1	WW domain||E3 ubiquitin-protein ligase, SMURF1 type||C2 domain||HECT domain	0.978959	4.35868e-06
ENSMUST00000187882.1	ENSMUSG00000099669.1	Gm29012	Annotated_lncRNA	ENSMUST00000001507	ENSMUSG00000001467	Cyp51	Cytochrome P450, E-class, group IV||Cytochrome P450, conserved site||Cytochrome P450	0.967031	2.07445e-05
ENSMUST00000187882.1	ENSMUSG00000099669.1	Gm29012	Annotated_lncRNA	ENSMUST00000069451	ENSMUSG00000055737	Ghr	Growth hormone/erythropoietin receptor, ligand binding||Growth hormone-binding protein||Fibronectin type III||Long hematopoietin receptor, single chain, conserved site	0.970706	1.37666e-05
ENSMUST00000187882.1	ENSMUSG00000099669.1	Gm29012	Annotated_lncRNA	ENSMUST00000044415	ENSMUSG00000039263	Npepl1	Leucine aminopeptidase/peptidase B||Peptidase M17, leucyl aminopeptidase, C-terminal	0.95224	7.4801e-05
ENSMUST00000187882.1	ENSMUSG00000099669.1	Gm29012	Annotated_lncRNA	ENSMUST00000166852	ENSMUSG00000091742	Gm5093	Ribosomal protein L5 domain||Ribosomal protein L5||Ribosomal protein L5, conserved site||Ribosomal protein L5, N-terminal||Ribosomal protein L5, C-terminal	0.962865	3.13313e-05
ENSMUST00000187882.1	ENSMUSG00000099669.1	Gm29012	Annotated_lncRNA	ENSMUST00000146598	ENSMUSG00000027746	Ufm1	Ubiquitin-fold modifier 1||Ubiquitin-related domain	0.951934	7.64724e-05
ENSMUST00000187882.1	ENSMUSG00000099669.1	Gm29012	Annotated_lncRNA	ENSMUST00000203168	ENSMUSG00000032758	Kap	Kidney androgen-regulated protein	0.984131	1.63196e-06
ENSMUST00000187882.1	ENSMUSG00000099669.1	Gm29012	Annotated_lncRNA	ENSMUST00000035390	ENSMUSG00000037053	Azgp1	-||MHC classes I/II-like antigen recognition protein||MHC class I alpha chain||Immunoglobulin-like domain||Immunoglobulin C1-set||MHC class I alpha chain, alpha1 alpha2 domains	0.960493	3.88238e-05
ENSMUST00000187882.1	ENSMUSG00000099669.1	Gm29012	Annotated_lncRNA	ENSMUST00000027185	ENSMUSG00000026027	Stradb	Protein kinase domain||Serine/threonine/dual specificity protein kinase, catalytic domain||-||Protein kinase-like domain	0.961127	3.67095e-05
ENSMUST00000187882.1	ENSMUSG00000099669.1	Gm29012	Annotated_lncRNA	ENSMUST00000034878	ENSMUSG00000032328	Tmem30a	CDC50/LEM3 family	0.960494	3.88218e-05
ENSMUST00000187882.1	ENSMUSG00000099669.1	Gm29012	Annotated_lncRNA	ENSMUST00000125770	ENSMUSG00000006345	Ggt1	Nucleophile aminohydrolases, N-terminal||Gamma-glutamyltranspeptidase||-	0.960596	3.84743e-05
ENSMUST00000187882.1	ENSMUSG00000099669.1	Gm29012	Annotated_lncRNA	ENSMUST00000021738	ENSMUSG00000021306	Gpr137b	-	0.951216	8.0487e-05
ENSMUST00000187882.1	ENSMUSG00000099669.1	Gm29012	Annotated_lncRNA	ENSMUST00000091237	ENSMUSG00000031441	Atp11a	P-type ATPase, A domain||P-type ATPase, phosphorylation site||-||P-type ATPase, cytoplasmic domain N||P-type ATPase, subfamily IV||P-type ATPase||HAD-like domain	0.950371	8.54043e-05
ENSMUST00000187882.1	ENSMUSG00000099669.1	Gm29012	Annotated_lncRNA	ENSMUST00000028389	ENSMUSG00000027004	Frzb	Frizzled domain||Netrin module, non-TIMP type||Netrin domain||Tissue inhibitor of metalloproteinases-like, OB-fold	0.986812	8.56187e-07
ENSMUST00000187882.1	ENSMUSG00000099669.1	Gm29012	Annotated_lncRNA	ENSMUST00000028841	ENSMUSG00000027363	Usp8	Ubiquitin specific protease, conserved site||Ubiquitin specific protease domain||USP8 dimerisation domain||Peptidase C19, ubiquitin carboxyl-terminal hydrolase||Rhodanese-like domain	0.958115	4.75251e-05
ENSMUST00000187882.1	ENSMUSG00000099669.1	Gm29012	Annotated_lncRNA	ENSMUST00000025546	ENSMUSG00000024644	Cndp2	Peptidase M20||Glutathione degradosome, DUG1||Peptidase M20, dimerisation domain||ArgE/DapE/ACY1/CPG2/YscS, conserved site	0.980782	3.17969e-06
ENSMUST00000187882.1	ENSMUSG00000099669.1	Gm29012	Annotated_lncRNA	ENSMUST00000054030	ENSMUSG00000024866	Acy3	Aspartoacylase||Succinylglutamate desuccinylase/aspartoacylase	0.977625	5.39762e-06
ENSMUST00000187882.1	ENSMUSG00000099669.1	Gm29012	Annotated_lncRNA	ENSMUST00000084647	ENSMUSG00000030945	Acsm2	AMP-dependent synthetase/ligase||AMP-binding enzyme C-terminal domain||AMP-binding, conserved site	0.952923	7.11757e-05
ENSMUST00000187882.1	ENSMUSG00000099669.1	Gm29012	Annotated_lncRNA	ENSMUST00000073782	ENSMUSG00000060336	Zfp937	Krueppel-associated box||Zinc finger, C2H2-like||Zinc finger, C2H2	0.980638	3.26338e-06
ENSMUST00000187882.1	ENSMUSG00000099669.1	Gm29012	Annotated_lncRNA	ENSMUST00000178605	ENSMUSG00000000420	Galnt1	Ricin B, lectin domain||Glycosyltransferase 2-like||Nucleotide-diphospho-sugar transferases||-	0.964563	2.66424e-05
ENSMUST00000187882.1	ENSMUSG00000099669.1	Gm29012	Annotated_lncRNA	ENSMUST00000110422	ENSMUSG00000036083	Slc17a3	Major facilitator superfamily||Major facilitator superfamily domain||Sodium-dependent phosphate transport protein 4 , predicted	0.969634	1.55956e-05
ENSMUST00000187882.1	ENSMUSG00000099669.1	Gm29012	Annotated_lncRNA	ENSMUST00000031093	ENSMUSG00000029193	Cckar	G protein-coupled receptor, rhodopsin-like||Cholecystokinin A receptor, N-terminal||GPCR, rhodopsin-like, 7TM||Cholecystokinin receptor type A||Cholecystokinin receptor||Gastrin receptor	0.981919	2.57143e-06
ENSMUST00000187882.1	ENSMUSG00000099669.1	Gm29012	Annotated_lncRNA	ENSMUST00000115964	ENSMUSG00000079834	Tmlhe	Domain of unknown function DUF971||Trimethyllysine dioxygenase||TauD/TfdA-like domain	0.952326	7.43402e-05
ENSMUST00000187882.1	ENSMUSG00000099669.1	Gm29012	Annotated_lncRNA	ENSMUST00000200335	ENSMUSG00000040351	Ankib1	Ubiquitin interacting motif||IBR domain||Zinc finger, RING-type||Ankyrin repeat-containing domain||Ankyrin repeat	0.982243	2.41452e-06
ENSMUST00000187882.1	ENSMUSG00000099669.1	Gm29012	Annotated_lncRNA	ENSMUST00000070877	ENSMUSG00000022244	Amacr	CoA-transferase family III||CoA-transferase family III domain	0.985826	1.10085e-06
ENSMUST00000187882.1	ENSMUSG00000099669.1	Gm29012	Annotated_lncRNA	ENSMUST00000021806	ENSMUSG00000021376	Tpmt	Thiopurine S-methyltransferase||TPMT family||S-adenosyl-L-methionine-dependent methyltransferase	0.964958	2.56282e-05
ENSMUST00000187882.1	ENSMUSG00000099669.1	Gm29012	Annotated_lncRNA	ENSMUST00000028010	ENSMUSG00000026691	Fmo3	Flavin monooxygenase FMO||Flavin monooxygenase (FMO) 3||Flavin monooxygenase-like||Dimethylaniline monooxygenase, N-oxide-forming	0.957485	5.00426e-05
ENSMUST00000187882.1	ENSMUSG00000099669.1	Gm29012	Annotated_lncRNA	ENSMUST00000112231	ENSMUSG00000048120	Entpd1	Nucleoside phosphatase GDA1/CD39	-0.964077	2.79289e-05
ENSMUST00000187882.1	ENSMUSG00000099669.1	Gm29012	Annotated_lncRNA	ENSMUST00000058119	ENSMUSG00000048040	Arxes2	Signal peptidase 22kDa subunit	0.959959	4.06688e-05
ENSMUST00000187882.1	ENSMUSG00000099669.1	Gm29012	Annotated_lncRNA	ENSMUST00000154553	ENSMUSG00000073468	Sft2d1	Vesicle transport protein, Got1/SFT2-like||-	0.957128	5.15098e-05
ENSMUST00000187882.1	ENSMUSG00000099669.1	Gm29012	Annotated_lncRNA	ENSMUST00000031251	ENSMUSG00000029311	Hsd17b11	Glucose/ribitol dehydrogenase||Short-chain dehydrogenase/reductase SDR	0.953712	6.71371e-05
ENSMUST00000187882.1	ENSMUSG00000099669.1	Gm29012	Annotated_lncRNA	ENSMUST00000087012	ENSMUSG00000067144	Slc22a7	Major facilitator superfamily domain||Organic cation transport protein||Major facilitator, sugar transporter-like	0.987427	7.24941e-07
ENSMUST00000187882.1	ENSMUSG00000099669.1	Gm29012	Annotated_lncRNA	ENSMUST00000111063	ENSMUSG00000016386	Mpped2	Calcineurin-like phosphoesterase||-||Calcineurin-like phosphoesterase domain, apaH type||Metallo-dependent phosphatase-like	0.955888	5.68487e-05
ENSMUST00000187882.1	ENSMUSG00000099669.1	Gm29012	Annotated_lncRNA	ENSMUST00000111742	ENSMUSG00000030268	Bcat1	Aminotransferase class IV||Aminotransferase, class IV, conserved site||Branched-chain amino acid aminotransferase II	0.982028	2.51767e-06
ENSMUST00000187882.1	ENSMUSG00000099669.1	Gm29012	Annotated_lncRNA	ENSMUST00000148144	ENSMUSG00000034593	Myo5a	Dilute domain||P-loop containing nucleoside triphosphate hydrolase||-||Myosin head, motor domain||IQ motif, EF-hand binding site||Myosin S1 fragment, N-terminal	0.976053	6.83506e-06
ENSMUST00000187882.1	ENSMUSG00000099669.1	Gm29012	Annotated_lncRNA	ENSMUST00000011492	ENSMUSG00000027710	Acad9	Acyl-CoA oxidase/dehydrogenase, central domain||Acyl-CoA dehydrogenase/oxidase C-terminal||Acyl-CoA dehydrogenase, conserved site||Acyl-CoA dehydrogenase/oxidase, N-terminal||Acyl-CoA dehydrogenase/oxidase, N-terminal and middle domain	0.958222	4.71069e-05
ENSMUST00000187882.1	ENSMUSG00000099669.1	Gm29012	Annotated_lncRNA	ENSMUST00000059515	ENSMUSG00000021218	Gdi2	Rab GDI protein||GDP dissociation inhibitor	0.969611	1.56374e-05
ENSMUST00000187882.1	ENSMUSG00000099669.1	Gm29012	Annotated_lncRNA	ENSMUST00000144177	ENSMUSG00000025911	Adhfe1	-||Alcohol dehydrogenase, iron-type	0.975976	6.91256e-06
ENSMUST00000187882.1	ENSMUSG00000099669.1	Gm29012	Annotated_lncRNA	ENSMUST00000067888	ENSMUSG00000029735	Tpk1	Thiamin pyrophosphokinase||Thiamin pyrophosphokinase, eukaryotic||Thiamin pyrophosphokinase, vitamin B1-binding domain||Thiamin pyrophosphokinase, catalytic domain	0.961322	3.60753e-05
ENSMUST00000187882.1	ENSMUSG00000099669.1	Gm29012	Annotated_lncRNA	ENSMUST00000028332	ENSMUSG00000026958	Dpp7	Peptidase S28||Alpha/Beta hydrolase fold	0.955557	5.83367e-05
ENSMUST00000187882.1	ENSMUSG00000099669.1	Gm29012	Annotated_lncRNA	ENSMUST00000180196	ENSMUSG00000053897	Slc39a8	Zinc/iron permease	0.966333	2.23074e-05
ENSMUST00000187882.1	ENSMUSG00000099669.1	Gm29012	Annotated_lncRNA	ENSMUST00000026122	ENSMUSG00000025130	P4hb	Disulphide isomerase||Thioredoxin domain||Protein disulphide isomerase||Thioredoxin, conserved site||Thioredoxin-like fold	0.961798	3.45624e-05
ENSMUST00000187882.1	ENSMUSG00000099669.1	Gm29012	Annotated_lncRNA	ENSMUST00000027800	ENSMUSG00000026519	Tmem63a	-||Calcium-dependent channel, 7TM region, putative phosphate||10TM putative phosphate transporter, cytosolic domain	-0.95196	7.63296e-05
ENSMUST00000187882.1	ENSMUSG00000099669.1	Gm29012	Annotated_lncRNA	ENSMUST00000114466	ENSMUSG00000029822	Osbpl3	-||Oxysterol-binding protein, conserved site||Pleckstrin homology domain||Oxysterol-binding protein	0.975846	7.0425e-06
ENSMUST00000187882.1	ENSMUSG00000099669.1	Gm29012	Annotated_lncRNA	ENSMUST00000029729	ENSMUSG00000028088	Fmo5	Flavin monooxygenase-like||Flavin monooxygenase FMO||Dimethylaniline monooxygenase, N-oxide-forming||Flavin monooxygenase (FMO) 5	0.960162	3.99594e-05
ENSMUST00000187882.1	ENSMUSG00000099669.1	Gm29012	Annotated_lncRNA	ENSMUST00000033818	ENSMUSG00000031441	Atp11a	P-type ATPase, A domain||P-type ATPase, phosphorylation site||-||P-type ATPase, cytoplasmic domain N||P-type ATPase, subfamily IV||P-type ATPase||HAD-like domain	0.968898	1.69462e-05
ENSMUST00000187882.1	ENSMUSG00000099669.1	Gm29012	Annotated_lncRNA	ENSMUST00000147153	ENSMUSG00000087303	Lipo2	Alpha/Beta hydrolase fold||Lipase, eukaryotic||Partial AB-hydrolase lipase domain||Alpha/beta hydrolase fold-1	0.951028	8.15619e-05
ENSMUST00000187882.1	ENSMUSG00000099669.1	Gm29012	Annotated_lncRNA	ENSMUST00000000095	ENSMUSG00000000093	Tbx2	Transcription factor, T-box, region of unknown function||p53-like transcription factor, DNA-binding||Transcription factor, T-box||Transcription factor, Brachyury||Transcription factor, T-box, conserved site	-0.971195	1.29858e-05
ENSMUST00000187882.1	ENSMUSG00000099669.1	Gm29012	Annotated_lncRNA	ENSMUST00000005953	ENSMUSG00000005803	Sqrdl	Pyridine nucleotide-disulphide oxidoreductase, FAD/NAD(P)-binding domain||-	-0.958897	4.45267e-05
ENSMUST00000187882.1	ENSMUSG00000099669.1	Gm29012	Annotated_lncRNA	ENSMUST00000034618	ENSMUSG00000032105	Pdzd3	PDZ domain	0.953787	6.67613e-05
ENSMUST00000187882.1	ENSMUSG00000099669.1	Gm29012	Annotated_lncRNA	ENSMUST00000159109	ENSMUSG00000040524	Zfp609	-||Zinc finger, C2H2	-0.950256	8.60841e-05
ENSMUST00000187882.1	ENSMUSG00000099669.1	Gm29012	Annotated_lncRNA	ENSMUST00000046122	ENSMUSG00000039682	Lap3	Peptidase M17, leucyl aminopeptidase, C-terminal||Leucine aminopeptidase/peptidase B||-||Peptidase M17, leucyl aminopeptidase, N-terminal	0.970418	1.42414e-05
ENSMUST00000187882.1	ENSMUSG00000099669.1	Gm29012	Annotated_lncRNA	ENSMUST00000105333	ENSMUSG00000059406	Tmprss9	Peptidase S1, trypsin family, active site||SEA domain||Low-density lipoprotein (LDL) receptor class A repeat||Peptidase S1A, chymotrypsin-type||Peptidase S1, PA clan||Serine proteases, trypsin domain||Transmembrane protease serine 9	0.972128	1.15823e-05
ENSMUST00000187882.1	ENSMUSG00000099669.1	Gm29012	Annotated_lncRNA	ENSMUST00000004232	ENSMUSG00000074207	Adh1	Alcohol dehydrogenase, C-terminal||Alcohol dehydrogenase, N-terminal||Alcohol dehydrogenase, zinc-type, conserved site||GroES-like||Polyketide synthase, enoylreductase domain||-	0.988646	5.07802e-07
ENSMUST00000187882.1	ENSMUSG00000099669.1	Gm29012	Annotated_lncRNA	ENSMUST00000026552	ENSMUSG00000025479	Cyp2e1	Cytochrome P450, conserved site||Cytochrome P450||Cytochrome P450, E-class, group I, CYP2E-like||Cytochrome P450, E-class, group I	0.96125	3.63073e-05
ENSMUST00000187882.1	ENSMUSG00000099669.1	Gm29012	Annotated_lncRNA	ENSMUST00000045229	ENSMUSG00000038497	Tmco3	Cation/H+ exchanger	0.966765	2.13311e-05
ENSMUST00000187882.1	ENSMUSG00000099669.1	Gm29012	Annotated_lncRNA	ENSMUST00000049470	ENSMUSG00000042305	Tmem183a	F-box domain||-	0.960507	3.87747e-05
ENSMUST00000187882.1	ENSMUSG00000099669.1	Gm29012	Annotated_lncRNA	ENSMUST00000051633	ENSMUSG00000047719	Ubiad1	UbiA prenyltransferase family||UbiA prenyltransferase domain containing protein 1	0.983183	1.99756e-06
ENSMUST00000187882.1	ENSMUSG00000099669.1	Gm29012	Annotated_lncRNA	ENSMUST00000024755	ENSMUSG00000023959	Clic5	Glutathione S-transferase, C-terminal-like||Intracellular chloride channel||Glutathione S-transferase, N-terminal||Thioredoxin-like fold	0.952092	7.56082e-05
ENSMUST00000187882.1	ENSMUSG00000099669.1	Gm29012	Annotated_lncRNA	ENSMUST00000052740	ENSMUSG00000046603	Tcaim	Domain of unknown function DUF4460||Domain of unknown function DUF4461	0.962388	3.27496e-05
ENSMUST00000187882.1	ENSMUSG00000099669.1	Gm29012	Annotated_lncRNA	ENSMUST00000034989	ENSMUSG00000032418	Me1	Malic enzyme, N-terminal domain||Malic enzyme, conserved site||Malic oxidoreductase||Malic enzyme, NAD-binding	0.964446	2.69479e-05
ENSMUST00000187882.1	ENSMUSG00000099669.1	Gm29012	Annotated_lncRNA	ENSMUST00000122194	ENSMUSG00000021236	Entpd5	Nucleoside phosphatase GDA1/CD39	0.957801	4.87681e-05
ENSMUST00000187882.1	ENSMUSG00000099669.1	Gm29012	Annotated_lncRNA	ENSMUST00000132974	ENSMUSG00000031441	Atp11a	P-type ATPase, A domain||P-type ATPase, phosphorylation site||-||P-type ATPase, cytoplasmic domain N||P-type ATPase, subfamily IV||P-type ATPase||HAD-like domain	0.976888	6.04207e-06
ENSMUST00000187882.1	ENSMUSG00000099669.1	Gm29012	Annotated_lncRNA	ENSMUST00000082424	ENSMUSG00000064373	Sepp1	Selenoprotein P, N-terminal||Selenoprotein P, C-terminal	0.950633	8.3854e-05
ENSMUST00000187882.1	ENSMUSG00000099669.1	Gm29012	Annotated_lncRNA	ENSMUST00000071430	ENSMUSG00000062619	2310039H08Rik	-	0.951325	7.98664e-05
ENSMUST00000187882.1	ENSMUSG00000099669.1	Gm29012	Annotated_lncRNA	ENSMUST00000022871	ENSMUSG00000022261	Sdc2	Syndecan, conserved site||Neurexin/syndecan/glycophorin C||Syndecan/Neurexin domain	0.956818	5.2809e-05
ENSMUST00000187882.1	ENSMUSG00000099669.1	Gm29012	Annotated_lncRNA	ENSMUST00000176056	ENSMUSG00000042410	Agps	FAD-linked oxidase, C-terminal||FAD-linked oxidase-like, C-terminal||-||FAD linked oxidase, N-terminal||FAD-binding, type 2	0.972885	1.05256e-05
ENSMUST00000187882.1	ENSMUSG00000099669.1	Gm29012	Annotated_lncRNA	ENSMUST00000179636	ENSMUSG00000019894	Slc6a15	Sodium:neurotransmitter symporter||Sodium:neurotransmitter symporter, orphan	0.959104	4.3754e-05
ENSMUST00000187882.1	ENSMUSG00000099669.1	Gm29012	Annotated_lncRNA	ENSMUST00000027381	ENSMUSG00000026189	Pecr	-||Glucose/ribitol dehydrogenase||Short-chain dehydrogenase/reductase SDR	0.956938	5.2306e-05
ENSMUST00000187882.1	ENSMUSG00000099669.1	Gm29012	Annotated_lncRNA	ENSMUST00000149405	ENSMUSG00000052712	BC004004	-	0.95007	8.72044e-05
ENSMUST00000187882.1	ENSMUSG00000099669.1	Gm29012	Annotated_lncRNA	ENSMUST00000159899	ENSMUSG00000039047	Pigk	Peptidase C13, legumain||GPI-anchor transamidase||-	0.955207	5.99408e-05
ENSMUST00000187882.1	ENSMUSG00000099669.1	Gm29012	Annotated_lncRNA	ENSMUST00000118991	ENSMUSG00000024070	Prkd3	Pleckstrin homology domain||Serine/threonine/dual specificity protein kinase, catalytic domain||Protein kinase domain||Protein kinase-like domain||Protein kinase, ATP binding site||Protein kinase C mu-related||Protein kinase C-like, phorbol ester/diacylglycerol-binding domain||Serine/threonine-protein kinase, active site||Diacylglycerol/phorbol-ester binding	0.953997	6.57208e-05
ENSMUST00000187882.1	ENSMUSG00000099669.1	Gm29012	Annotated_lncRNA	ENSMUST00000020488	ENSMUSG00000020255	D10Wsu102e	Protein of unknown function DUF4598	0.986399	9.53524e-07
ENSMUST00000187882.1	ENSMUSG00000099669.1	Gm29012	Annotated_lncRNA	ENSMUST00000023590	ENSMUSG00000022877	Hrg	Cystatin domain	0.954587	6.28523e-05
ENSMUST00000187882.1	ENSMUSG00000099669.1	Gm29012	Annotated_lncRNA	ENSMUST00000175646	ENSMUSG00000042410	Agps	FAD-linked oxidase, C-terminal||FAD-linked oxidase-like, C-terminal||-||FAD linked oxidase, N-terminal||FAD-binding, type 2	0.970052	1.48639e-05
ENSMUST00000187882.1	ENSMUSG00000099669.1	Gm29012	Annotated_lncRNA	ENSMUST00000112460	ENSMUSG00000033610	Pank1	Type II pantothenate kinase	0.950815	8.27944e-05
ENSMUST00000187882.1	ENSMUSG00000099669.1	Gm29012	Annotated_lncRNA	ENSMUST00000015712	ENSMUSG00000015568	Lpl	Alpha/Beta hydrolase fold||Lipase, N-terminal||Triacylglycerol lipase family||PLAT/LH2 domain||Lipase, LIPH-type||Lipoprotein lipase	0.993454	7.42648e-08
ENSMUST00000187882.1	ENSMUSG00000099669.1	Gm29012	Annotated_lncRNA	ENSMUST00000145928	ENSMUSG00000006345	Ggt1	Nucleophile aminohydrolases, N-terminal||Gamma-glutamyltranspeptidase||-	0.976462	6.4382e-06
ENSMUST00000187882.1	ENSMUSG00000099669.1	Gm29012	Annotated_lncRNA	ENSMUST00000169095	ENSMUSG00000002944	Cd36	Adhesion molecule CD36||CD36 antigen	0.954228	6.45875e-05
ENSMUST00000187882.1	ENSMUSG00000099669.1	Gm29012	Annotated_lncRNA	ENSMUST00000114091	ENSMUSG00000031402	Mpp1	PDZ domain||Guanylate kinase, conserved site||P-loop containing nucleoside triphosphate hydrolase||SH3 domain||Guanylate kinase-like domain||-||Variant SH3 domain||Guanylate kinase/L-type calcium channel beta subunit	0.955129	6.02985e-05
ENSMUST00000187882.1	ENSMUSG00000099669.1	Gm29012	Annotated_lncRNA	ENSMUST00000061491	ENSMUSG00000027359	Slc27a2	AMP-binding, conserved site||AMP-binding enzyme C-terminal domain||AMP-dependent synthetase/ligase	0.953555	6.79271e-05
ENSMUST00000187882.1	ENSMUSG00000099669.1	Gm29012	Annotated_lncRNA	ENSMUST00000084881	ENSMUSG00000032431	Crtap	-	0.993142	8.73822e-08
ENSMUST00000187882.1	ENSMUSG00000099669.1	Gm29012	Annotated_lncRNA	ENSMUST00000079869	ENSMUSG00000058446	Znrf2	-||Zinc finger, RING-type	0.96086	3.75894e-05
ENSMUST00000187882.1	ENSMUSG00000099669.1	Gm29012	Annotated_lncRNA	ENSMUST00000163705	ENSMUSG00000038522	AI317395	Major facilitator superfamily domain||Major facilitator superfamily	0.972302	1.13337e-05
ENSMUST00000187882.1	ENSMUSG00000099669.1	Gm29012	Annotated_lncRNA	ENSMUST00000127247	ENSMUSG00000048022	Tmem229a	-	0.972817	1.06178e-05
ENSMUST00000187882.1	ENSMUSG00000099669.1	Gm29012	Annotated_lncRNA	ENSMUST00000118768	ENSMUSG00000024070	Prkd3	Pleckstrin homology domain||Serine/threonine/dual specificity protein kinase, catalytic domain||Protein kinase domain||Protein kinase-like domain||Protein kinase, ATP binding site||Protein kinase C mu-related||Protein kinase C-like, phorbol ester/diacylglycerol-binding domain||Serine/threonine-protein kinase, active site||Diacylglycerol/phorbol-ester binding	0.963371	2.98788e-05
ENSMUST00000187882.1	ENSMUSG00000099669.1	Gm29012	Annotated_lncRNA	ENSMUST00000034466	ENSMUSG00000031985	Gnpat	Phospholipid/glycerol acyltransferase||Dihydroxyacetone phosphate acyltransferase||Glycerol-3-phosphate O-acyltransferase/Dihydroxyacetone phosphate acyltransferase	0.97873	4.52575e-06
ENSMUST00000187882.1	ENSMUSG00000099669.1	Gm29012	Annotated_lncRNA	ENSMUST00000129281	ENSMUSG00000034593	Myo5a	Dilute domain||P-loop containing nucleoside triphosphate hydrolase||-||Myosin head, motor domain||IQ motif, EF-hand binding site||Myosin S1 fragment, N-terminal	0.969434	1.59544e-05
ENSMUST00000187882.1	ENSMUSG00000099669.1	Gm29012	Annotated_lncRNA	ENSMUST00000021691	ENSMUSG00000021263	Degs2	Sphingolipid delta4-desaturase, N-terminal||Sphingolipid delta4-desaturase||Fatty acid desaturase domain	0.985004	1.33998e-06
ENSMUST00000187882.1	ENSMUSG00000099669.1	Gm29012	Annotated_lncRNA	ENSMUST00000023805	ENSMUSG00000023044	Csad	Pyridoxal-phosphate binding site||Pyridoxal phosphate-dependent decarboxylase||Pyridoxal phosphate-dependent transferase	0.95718	5.12965e-05
ENSMUST00000187882.1	ENSMUSG00000099669.1	Gm29012	Annotated_lncRNA	ENSMUST00000005066	ENSMUSG00000004936	Map2k1	Protein kinase, ATP binding site||Serine/threonine/dual specificity protein kinase, catalytic domain||Protein kinase-like domain||Protein kinase domain||Serine/threonine-protein kinase, active site	-0.95191	7.6601e-05
ENSMUST00000187882.1	ENSMUSG00000099669.1	Gm29012	Annotated_lncRNA	ENSMUST00000000260	ENSMUSG00000000253	Gmpr	IMP dehydrogenase/GMP reductase||Guanosine monophosphate reductase 1||IMP dehydrogenase / GMP reductase, conserved site	0.969599	1.56582e-05
ENSMUST00000187882.1	ENSMUSG00000099669.1	Gm29012	Annotated_lncRNA	ENSMUST00000030408	ENSMUSG00000028655	Mfsd2a	-||Major facilitator superfamily domain	0.960655	3.82752e-05
ENSMUST00000187882.1	ENSMUSG00000099669.1	Gm29012	Annotated_lncRNA	ENSMUST00000143226	ENSMUSG00000006345	Ggt1	Nucleophile aminohydrolases, N-terminal||Gamma-glutamyltranspeptidase||-	0.982945	2.09813e-06
ENSMUST00000187882.1	ENSMUSG00000099669.1	Gm29012	Annotated_lncRNA	ENSMUST00000093059	ENSMUSG00000069867	Pabpn1l	RNA recognition motif domain	0.975059	7.87366e-06
ENSMUST00000187882.1	ENSMUSG00000099669.1	Gm29012	Annotated_lncRNA	ENSMUST00000084343	ENSMUSG00000066071	Cyp4a12a	Cytochrome P450, conserved site||Cytochrome P450||Cytochrome P450, E-class, group I	0.956861	5.26295e-05
ENSMUST00000187882.1	ENSMUSG00000099669.1	Gm29012	Annotated_lncRNA	ENSMUST00000107591	ENSMUSG00000030498	Gas2	Calponin homology domain||Growth-arrest-specific protein 2 domain||-	0.960009	4.04957e-05
ENSMUST00000187882.1	ENSMUSG00000099669.1	Gm29012	Annotated_lncRNA	ENSMUST00000034000	ENSMUSG00000031591	Asah1	Choloylglycine hydrolase/NAAA C-terminal||Acid ceramidase, N-terminal||Acid ceramidase-like	0.967573	1.95865e-05
ENSMUST00000187882.1	ENSMUSG00000099669.1	Gm29012	Annotated_lncRNA	ENSMUST00000107256	ENSMUSG00000030559	Rab38	Small GTPase superfamily, Rab type||Small GTPase superfamily, Ras type||P-loop containing nucleoside triphosphate hydrolase||Small GTPase superfamily, Rho type||Small GTP-binding protein domain||Ran GTPase||Small GTPase superfamily	0.978461	4.72832e-06
ENSMUST00000187882.1	ENSMUSG00000099669.1	Gm29012	Annotated_lncRNA	ENSMUST00000026324	ENSMUSG00000025287	Acot9	-||HotDog domain	0.957496	4.99982e-05
ENSMUST00000187882.1	ENSMUSG00000099669.1	Gm29012	Annotated_lncRNA	ENSMUST00000032469	ENSMUSG00000030322	Mbd4	Methyl-CpG-binding domain protein 4||Methyl-CpG DNA binding||DNA glycosylase||DNA-binding domain||HhH-GPD domain	0.958714	4.52136e-05
ENSMUST00000187882.1	ENSMUSG00000099669.1	Gm29012	Annotated_lncRNA	ENSMUST00000026595	ENSMUSG00000025521	Tmem192	TMEM192 family	0.959643	4.17898e-05
ENSMUST00000187882.1	ENSMUSG00000099669.1	Gm29012	Annotated_lncRNA	ENSMUST00000048967	ENSMUSG00000037852	Cpe	Carboxypeptidase-like, regulatory domain||Peptidase M14, carboxypeptidase A	0.986839	8.50201e-07
ENSMUST00000187882.1	ENSMUSG00000099669.1	Gm29012	Annotated_lncRNA	ENSMUST00000143359	ENSMUSG00000031441	Atp11a	P-type ATPase, A domain||P-type ATPase, phosphorylation site||-||P-type ATPase, cytoplasmic domain N||P-type ATPase, subfamily IV||P-type ATPase||HAD-like domain	0.963825	2.8615e-05
ENSMUST00000187882.1	ENSMUSG00000099669.1	Gm29012	Annotated_lncRNA	ENSMUST00000003720	ENSMUSG00000003623	Crot	Acyltransferase ChoActase/COT/CPT	0.980492	3.34984e-06
ENSMUST00000187882.1	ENSMUSG00000099669.1	Gm29012	Annotated_lncRNA	ENSMUST00000053771	ENSMUSG00000036879	Phkb	Six-hairpin glycosidase-like||-||Glycoside hydrolase family 15/Phosphorylase b kinase regulatory chain family	0.95905	4.39548e-05
ENSMUST00000187882.1	ENSMUSG00000099669.1	Gm29012	Annotated_lncRNA	ENSMUST00000061295	ENSMUSG00000038009	Dnajc22	DnaJ domain||TM2 domain	0.972342	1.12771e-05
ENSMUST00000187882.1	ENSMUSG00000099669.1	Gm29012	Annotated_lncRNA	ENSMUST00000027036	ENSMUSG00000025903	Lypla1	Alpha/Beta hydrolase fold||Phospholipase/carboxylesterase/thioesterase	0.972063	1.16758e-05
ENSMUST00000187882.1	ENSMUSG00000099669.1	Gm29012	Annotated_lncRNA	ENSMUST00000025523	ENSMUSG00000024621	Csf1r	Serine-threonine/tyrosine-protein kinase catalytic domain||Macrophage colony-stimulating factor 1 receptor||Tyrosine-protein kinase, catalytic domain||Protein kinase domain||Tyrosine-protein kinase, CSF-1/PDGF receptor family||Tyrosine-protein kinase, active site||Immunoglobulin-like domain||Tyrosine-protein kinase, receptor class III, conserved site||Protein kinase, ATP binding site||Immunoglobu…	0.965734	2.37132e-05
ENSMUST00000187882.1	ENSMUSG00000099669.1	Gm29012	Annotated_lncRNA	ENSMUST00000037315	ENSMUSG00000039202	Abhd2	Alpha/Beta hydrolase fold||AB-hydrolase ABHD1/2/3||Uncharacterised protein family UPF0017, hydrolase-like, conserved site||Alpha/beta hydrolase fold-1	0.953592	6.77432e-05
ENSMUST00000187882.1	ENSMUSG00000099669.1	Gm29012	Annotated_lncRNA	ENSMUST00000128994	ENSMUSG00000027411	Vps16	Vacuolar protein sorting-associated protein 16||Vps16, N-terminal||Vps16, C-terminal	0.989586	3.75643e-07
ENSMUST00000187882.1	ENSMUSG00000099669.1	Gm29012	Annotated_lncRNA	ENSMUST00000169437	ENSMUSG00000070436	Serpinh1	Serpin domain||Serpin, conserved site	0.954053	6.54427e-05
ENSMUST00000187882.1	ENSMUSG00000099669.1	Gm29012	Annotated_lncRNA	ENSMUST00000042290	ENSMUSG00000037254	Itih2	Inter-alpha-trypsin inhibitor heavy chain, C-terminal||-||von Willebrand factor, type A||VIT domain	0.96694	2.09436e-05
ENSMUST00000187882.1	ENSMUSG00000099669.1	Gm29012	Annotated_lncRNA	ENSMUST00000042119	ENSMUSG00000041698	Slco1a1	Kazal domain||Organic anion transporter polypeptide OATP||Major facilitator superfamily domain	0.951036	8.15145e-05
ENSMUST00000187882.1	ENSMUSG00000099669.1	Gm29012	Annotated_lncRNA	ENSMUST00000048032	ENSMUSG00000032758	Kap	Kidney androgen-regulated protein	0.968522	1.76691e-05
ENSMUST00000187882.1	ENSMUSG00000099669.1	Gm29012	Annotated_lncRNA	ENSMUST00000039721	ENSMUSG00000036083	Slc17a3	Major facilitator superfamily||Major facilitator superfamily domain||Sodium-dependent phosphate transport protein 4 , predicted	0.950082	8.71313e-05
ENSMUST00000187882.1	ENSMUSG00000099669.1	Gm29012	Annotated_lncRNA	ENSMUST00000174236	ENSMUSG00000038843	Gcnt1	Glycosyl transferase, family 14	0.963783	2.87308e-05
ENSMUST00000187882.1	ENSMUSG00000099669.1	Gm29012	Annotated_lncRNA	ENSMUST00000072818	ENSMUSG00000061906	Ugt2b38	UDP-glucuronosyl/UDP-glucosyltransferase	0.976657	6.25444e-06
ENSMUST00000187882.1	ENSMUSG00000099669.1	Gm29012	Annotated_lncRNA	ENSMUST00000025598	ENSMUSG00000024694	Keg1	Glycine N-acyltransferase, C-terminal||Acyl-CoA N-acyltransferase||Glycine N-acyltransferase, N-terminal	0.980603	3.28368e-06
ENSMUST00000187882.1	ENSMUSG00000099669.1	Gm29012	Annotated_lncRNA	ENSMUST00000022368	ENSMUSG00000021822	Plau	Kringle||Peptidase S1A, chymotrypsin-type||Peptidase S1, PA clan||Peptidase S1, trypsin family, active site||Kringle, conserved site||EGF-like, conserved site||EGF-like domain||Serine proteases, trypsin domain||Kringle-like fold	0.972004	1.17619e-05
ENSMUST00000187882.1	ENSMUSG00000099669.1	Gm29012	Annotated_lncRNA	ENSMUST00000101394	ENSMUSG00000020309	Chac2	Butirosin biosynthesis, BtrG-like||ChaC-like protein	0.965728	2.37272e-05
ENSMUST00000187882.1	ENSMUSG00000099669.1	Gm29012	Annotated_lncRNA	ENSMUST00000007212	ENSMUSG00000006998	Psmd2	26S proteasome regulatory complex, non-ATPase subcomplex, Rpn1 subunit||-||Armadillo-type fold||Proteasome/cyclosome repeat	0.960236	3.97056e-05
ENSMUST00000187882.1	ENSMUSG00000099669.1	Gm29012	Annotated_lncRNA	ENSMUST00000068545	ENSMUSG00000055137	Sugct	CoA-transferase family III domain||CoA-transferase family III	0.977351	5.63151e-06
ENSMUST00000187882.1	ENSMUSG00000099669.1	Gm29012	Annotated_lncRNA	ENSMUST00000025666	ENSMUSG00000024757	Slc22a19	Major facilitator superfamily domain||Major facilitator, sugar transporter-like	0.987129	7.86558e-07
ENSMUST00000187882.1	ENSMUSG00000099669.1	Gm29012	Annotated_lncRNA	ENSMUST00000046959	ENSMUSG00000040966	Slc22a2	Organic cation transport protein||Major facilitator, sugar transporter-like||Sugar transporter, conserved site||Major facilitator superfamily domain	0.976109	6.77985e-06
ENSMUST00000187882.1	ENSMUSG00000099669.1	Gm29012	Annotated_lncRNA	ENSMUST00000014694	ENSMUSG00000014550	Rbsn	Rabenosyn, Rab binding domain||Zinc finger, FYVE/PHD-type||FYVE zinc finger||Zinc finger, C2H2||-||Zinc finger, FYVE-related	0.95155	7.86036e-05
ENSMUST00000187882.1	ENSMUSG00000099669.1	Gm29012	Annotated_lncRNA	ENSMUST00000076846	ENSMUSG00000031750	Il34	Interleukin-34	0.973637	9.54665e-06
ENSMUST00000187882.1	ENSMUSG00000099669.1	Gm29012	Annotated_lncRNA	ENSMUST00000191104	ENSMUSG00000055322	Tns1	Tensin phosphotyrosine-binding domain||C2 domain||Protein-tyrosine phosphatase, catalytic||-||Protein-tyrosine phosphatase-like||PTB/PI domain||Tensin phosphatase, lipid phosphatase domain||SH2 domain||Protein kinase C-like, phorbol ester/diacylglycerol-binding domain||Tensin phosphatase, C2 domain	-0.958253	4.69874e-05
ENSMUST00000187882.1	ENSMUSG00000099669.1	Gm29012	Annotated_lncRNA	ENSMUST00000123082	ENSMUSG00000060771	Tsga10	-	0.960444	3.89909e-05
ENSMUST00000187882.1	ENSMUSG00000099669.1	Gm29012	Annotated_lncRNA	ENSMUST00000089162	ENSMUSG00000030104	Edem1	Glycoside hydrolase, family 47	0.955005	6.0876e-05
ENSMUST00000187882.1	ENSMUSG00000099669.1	Gm29012	Annotated_lncRNA	ENSMUST00000097973	ENSMUSG00000028571	Cyp2j13	Cytochrome P450, E-class, group I, CYP2J-like||Cytochrome P450||Cytochrome P450, conserved site||Cytochrome P450, E-class, group I	0.973335	9.93173e-06
ENSMUST00000187882.1	ENSMUSG00000099669.1	Gm29012	Annotated_lncRNA	ENSMUST00000111770	ENSMUSG00000029456	Acad10	HAD-like domain||Acyl-CoA dehydrogenase/oxidase, N-terminal||Protein kinase-like domain||Acyl-CoA oxidase/dehydrogenase, central domain||HAD hydrolase, subfamily IA||Predicted HAD-superfamily phosphatase, subfamily IA/Epoxide hydrolase, N-terminal||Acyl-CoA dehydrogenase/oxidase, N-terminal and middle domain||Aminoglycoside phosphotransferase||Acyl-CoA dehydrogenase/oxidase C-terminal	0.957274	5.09089e-05
ENSMUST00000187882.1	ENSMUSG00000099669.1	Gm29012	Annotated_lncRNA	ENSMUST00000007602	ENSMUSG00000007458	M6pr	Cation-dependent mannose-6-phosphate receptor||Mannose-6-phosphate receptor||Mannose-6-phosphate receptor binding domain	0.95416	6.4921e-05
ENSMUST00000187882.1	ENSMUSG00000099669.1	Gm29012	Annotated_lncRNA	ENSMUST00000039026	ENSMUSG00000037010	Apln	Apelin	0.98123	2.92892e-06
ENSMUST00000187882.1	ENSMUSG00000099669.1	Gm29012	Annotated_lncRNA	ENSMUST00000118138	ENSMUSG00000033653	Vps8	Zinc finger, RING-type||WD40 repeat||-||Quinoprotein amine dehydrogenase, beta chain-like||WD40-repeat-containing domain||Vacuolar protein sorting-associated protein 8, central domain	0.984148	1.62601e-06
ENSMUST00000187882.1	ENSMUSG00000099669.1	Gm29012	Annotated_lncRNA	ENSMUST00000094646	ENSMUSG00000009907	Vps4b	AAA+ ATPase domain||Vps4 oligomerisation, C-terminal||P-loop containing nucleoside triphosphate hydrolase||ATPase, AAA-type, conserved site||MIT||ATPase, AAA-type, core	0.954189	6.47787e-05
ENSMUST00000187882.1	ENSMUSG00000099669.1	Gm29012	Annotated_lncRNA	ENSMUST00000022169	ENSMUSG00000021665	Hexb	Glycoside hydrolase family 20, catalytic domain||Chitobiase/beta-hexosaminidase domain 2-like||Glycoside hydrolase superfamily||Beta-hexosaminidase, eukaryotic type, N-terminal||Beta-hexosaminidase	0.963391	2.98209e-05
ENSMUST00000187882.1	ENSMUSG00000099669.1	Gm29012	Annotated_lncRNA	ENSMUST00000036031	ENSMUSG00000039934	Gsap	Gamma-secretase-activating protein, C-terminal domain||-	0.976679	6.23383e-06
ENSMUST00000187882.1	ENSMUSG00000099669.1	Gm29012	Annotated_lncRNA	ENSMUST00000202361	ENSMUSG00000029657	Hsph1	Heat shock protein 70, conserved site||Heat shock protein 70kD, peptide-binding domain||Heat shock protein 70kD, C-terminal domain||Heat shock protein 70 family	0.968103	1.84982e-05
ENSMUST00000187882.1	ENSMUSG00000099669.1	Gm29012	Annotated_lncRNA	ENSMUST00000032824	ENSMUSG00000030603	Psmc4	ATPase, AAA-type, core||26S proteasome subunit P45||P-loop containing nucleoside triphosphate hydrolase||ATPase, AAA-type, conserved site||AAA+ ATPase domain	0.96756	1.96124e-05
ENSMUST00000187882.1	ENSMUSG00000099669.1	Gm29012	Annotated_lncRNA	ENSMUST00000060212	ENSMUSG00000019810	Fuca2	Glycoside hydrolase, family 29, conserved site||Glycoside hydrolase, family 29||-||Alpha-L-fucosidase, metazoa-type||Glycoside hydrolase superfamily	0.978335	4.82534e-06
ENSMUST00000187882.1	ENSMUSG00000099669.1	Gm29012	Annotated_lncRNA	ENSMUST00000154822	ENSMUSG00000024694	Keg1	Glycine N-acyltransferase, C-terminal||Acyl-CoA N-acyltransferase||Glycine N-acyltransferase, N-terminal	0.965373	2.45901e-05
ENSMUST00000187882.1	ENSMUSG00000099669.1	Gm29012	Annotated_lncRNA	ENSMUST00000004686	ENSMUSG00000069633	Pex11g	Peroxisomal biogenesis factor 11	0.957078	5.17208e-05
ENSMUST00000187882.1	ENSMUSG00000099669.1	Gm29012	Annotated_lncRNA	ENSMUST00000040987	ENSMUSG00000038641	Akr1d1	Aldo/keto reductase, conserved site||NADP-dependent oxidoreductase domain||Aldo/keto reductase subgroup	0.956548	5.39614e-05
ENSMUST00000187882.1	ENSMUSG00000099669.1	Gm29012	Annotated_lncRNA	ENSMUST00000021635	ENSMUSG00000021214	Akr1c18	Aldo/keto reductase, conserved site||Aldo/keto reductase subgroup||NADP-dependent oxidoreductase domain	0.956886	5.2524e-05
ENSMUST00000187882.1	ENSMUSG00000099669.1	Gm29012	Annotated_lncRNA	ENSMUST00000168406	ENSMUSG00000023367	Tmem176a	CD20-like family||-	0.956328	5.4913e-05
ENSMUST00000187882.1	ENSMUSG00000099669.1	Gm29012	Annotated_lncRNA	ENSMUST00000023360	ENSMUSG00000022679	Mpv17l	Mpv17/PMP22||-	0.962372	3.27982e-05
ENSMUST00000187882.1	ENSMUSG00000099669.1	Gm29012	Annotated_lncRNA	ENSMUST00000134503	ENSMUSG00000006345	Ggt1	Nucleophile aminohydrolases, N-terminal||Gamma-glutamyltranspeptidase||-	0.978428	4.75314e-06
ENSMUST00000187882.1	ENSMUSG00000099669.1	Gm29012	Annotated_lncRNA	ENSMUST00000115244	ENSMUSG00000026141	Col19a1	Laminin G domain||Concanavalin A-like lectin/glucanase domain||Collagen triple helix repeat	0.952789	7.18776e-05
ENSMUST00000187882.1	ENSMUSG00000099669.1	Gm29012	Annotated_lncRNA	ENSMUST00000134864	ENSMUSG00000036585	Fgf1	Fibroblast growth factor family||IL-1 family/FGF family||Cytokine, IL-1-like	0.965496	2.42897e-05
ENSMUST00000187882.1	ENSMUSG00000099669.1	Gm29012	Annotated_lncRNA	ENSMUST00000031103	ENSMUSG00000029201	Ugdh	6-phosphogluconate dehydrogenase C-terminal domain-like||UDP-glucose/GDP-mannose dehydrogenase, C-terminal||UDP-glucose/GDP-mannose dehydrogenase||UDP-glucose/GDP-mannose dehydrogenase, N-terminal||UDP-glucose 6-dehydrogenase, eukaryotic type||UDP-glucose/GDP-mannose dehydrogenase, dimerisation	0.968219	1.82656e-05
ENSMUST00000187882.1	ENSMUSG00000099669.1	Gm29012	Annotated_lncRNA	ENSMUST00000160860	ENSMUSG00000014164	Klhl3	Kelch repeat type 1||BTB-kelch protein||BTB/Kelch-associated||POZ domain||BTB/POZ domain	-0.967884	1.89416e-05
ENSMUST00000187882.1	ENSMUSG00000099669.1	Gm29012	Annotated_lncRNA	ENSMUST00000074127	ENSMUSG00000010025	Aldh3a2	Aldehyde dehydrogenase NAD(P)-dependent||Aldehyde dehydrogenase domain||Aldehyde/histidinol dehydrogenase||Aldehyde dehydrogenase, cysteine active site||Aldehyde dehydrogenase, glutamic acid active site	0.97054	1.40387e-05
ENSMUST00000187882.1	ENSMUSG00000099669.1	Gm29012	Annotated_lncRNA	ENSMUST00000127306	ENSMUSG00000028445	Enho	-	-0.954181	6.48172e-05
ENSMUST00000187882.1	ENSMUSG00000099669.1	Gm29012	Annotated_lncRNA	ENSMUST00000062562	ENSMUSG00000044309	Apol7c	Apolipoprotein L	0.960442	3.89969e-05
ENSMUST00000187882.1	ENSMUSG00000099669.1	Gm29012	Annotated_lncRNA	ENSMUST00000026406	ENSMUSG00000025350	Rdh5	Short-chain dehydrogenase/reductase SDR||-||Glucose/ribitol dehydrogenase	0.96143	3.57294e-05
ENSMUST00000187882.1	ENSMUSG00000099669.1	Gm29012	Annotated_lncRNA	ENSMUST00000002655	ENSMUSG00000002580	Mien1	Selenoprotein, Rdx type||Thioredoxin-like fold	0.973829	9.30743e-06
ENSMUST00000187882.1	ENSMUSG00000099669.1	Gm29012	Annotated_lncRNA	ENSMUST00000040218	ENSMUSG00000038206	Fbxo8	Sec7 domain||F-box domain	0.95461	6.27436e-05
ENSMUST00000187882.1	ENSMUSG00000099669.1	Gm29012	Annotated_lncRNA	ENSMUST00000109191	ENSMUSG00000074575	Kcng1	Potassium channel||Potassium channel, voltage dependent, Kv6||Potassium channel, voltage dependent, Kv||-||Potassium channel tetramerisation-type BTB domain||Ion transport domain||POZ domain||BTB/POZ domain	0.988744	4.92768e-07
ENSMUST00000187882.1	ENSMUSG00000099669.1	Gm29012	Annotated_lncRNA	ENSMUST00000072633	ENSMUSG00000020839	Tmigd1	Immunoglobulin subtype||Immunoglobulin I-set||Immunoglobulin-like domain||Immunoglobulin subtype 2	0.963961	2.82429e-05
ENSMUST00000187882.1	ENSMUSG00000099669.1	Gm29012	Annotated_lncRNA	ENSMUST00000034929	ENSMUSG00000032370	Lactb	Beta-lactamase-related||Beta-lactamase/transpeptidase-like	0.977362	5.62185e-06
ENSMUST00000187882.1	ENSMUSG00000099669.1	Gm29012	Annotated_lncRNA	ENSMUST00000035625	ENSMUSG00000039519	Cyp7b1	Cytochrome P450, cholesterol 7-alpha-monooxygenase-type||Cytochrome P450, E-class, group IV||Cytochrome P450	0.978365	4.80162e-06
ENSMUST00000187882.1	ENSMUSG00000099669.1	Gm29012	Annotated_lncRNA	ENSMUST00000090811	ENSMUSG00000008226	Scrn3	Peptidase C69, dipeptidase A	0.955529	5.84619e-05
ENSMUST00000187882.1	ENSMUSG00000099669.1	Gm29012	Annotated_lncRNA	ENSMUST00000096269	ENSMUSG00000052562	Slc22a30	Major facilitator, sugar transporter-like||Major facilitator superfamily domain	0.953974	6.58332e-05
ENSMUST00000187882.1	ENSMUSG00000099669.1	Gm29012	Annotated_lncRNA	ENSMUST00000117137	ENSMUSG00000023914	Mep1a	Peptidase, metallopeptidase||Concanavalin A-like lectin/glucanase domain||EGF-like domain||MATH/TRAF domain||Peptidase M12A, astacin||MAM domain||TRAF-like||Meprin alpha/beta subunit	0.98603	1.04662e-06
ENSMUST00000187882.1	ENSMUSG00000099669.1	Gm29012	Annotated_lncRNA	ENSMUST00000176041	ENSMUSG00000025613	Cct8	Chaperonin Cpn60/TCP-1 family||GroEL-like apical domain||Chaperonin TCP-1, conserved site||T-complex protein 1, theta subunit||-||Chaperone tailless complex polypeptide 1 (TCP-1)	0.955635	5.79838e-05
ENSMUST00000187882.1	ENSMUSG00000099669.1	Gm29012	Annotated_lncRNA	ENSMUST00000010198	ENSMUSG00000010054	Tusc2	Tumour suppressor candidate 2	0.954243	6.45132e-05
ENSMUST00000187882.1	ENSMUSG00000099669.1	Gm29012	Annotated_lncRNA	ENSMUST00000025419	ENSMUSG00000024538	Ppic	Cyclophilin-like domain||Cyclophilin-type peptidyl-prolyl cis-trans isomerase, conserved site||Cyclophilin-type peptidyl-prolyl cis-trans isomerase domain	0.991281	2.0205e-07
ENSMUST00000187882.1	ENSMUSG00000099669.1	Gm29012	Annotated_lncRNA	ENSMUST00000024944	ENSMUSG00000024131	Slc3a1	Glycoside hydrolase superfamily||Glycosyl hydrolase, family 13, subfamily, catalytic domain||Glycosyl hydrolase, family 13, catalytic domain	0.953254	6.94614e-05
ENSMUST00000187882.1	ENSMUSG00000099669.1	Gm29012	Annotated_lncRNA	ENSMUST00000049389	ENSMUSG00000039470	Zdhhc2	Zinc finger, DHHC-type, palmitoyltransferase	0.967821	1.90721e-05
ENSMUST00000187882.1	ENSMUSG00000099669.1	Gm29012	Annotated_lncRNA	ENSMUST00000052124	ENSMUSG00000039193	Nlrc4	CARD domain||P-loop containing nucleoside triphosphate hydrolase||Death-like domain||NACHT nucleoside triphosphatase	0.972796	1.06469e-05
ENSMUST00000187882.1	ENSMUSG00000099669.1	Gm29012	Annotated_lncRNA	ENSMUST00000200543	ENSMUSG00000028184	Adgrl2	GPCR, family 2-like||GPCR, family 2, secretin-like, conserved site||GPCR, family 2, latrophilin, C-terminal||D-galactoside/L-rhamnose binding SUEL lectin domain||GPCR, family 2, latrophilin||GPS motif||GPCR, family 2, secretin-like||Olfactomedin-like domain||GPCR, family 2, extracellular hormone receptor domain	0.957331	5.06736e-05
ENSMUST00000187882.1	ENSMUSG00000099669.1	Gm29012	Annotated_lncRNA	ENSMUST00000028769	ENSMUSG00000027303	Ptpra	Protein-tyrosine phosphatase, active site||Receptor tyrosine-protein phosphatase alpha||Tyrosine specific protein phosphatases domain||Receptor tyrosine-protein phosphatase, alpha/epsilon-type||PTP type protein phosphatase||Protein-tyrosine phosphatase-like||Protein-tyrosine phosphatase, catalytic	0.977788	5.26229e-06
ENSMUST00000187882.1	ENSMUSG00000099669.1	Gm29012	Annotated_lncRNA	ENSMUST00000010049	ENSMUSG00000009905	Kdsr	Short-chain dehydrogenase/reductase, conserved site||Glucose/ribitol dehydrogenase||Short-chain dehydrogenase/reductase SDR	0.977241	5.72699e-06
ENSMUST00000187882.1	ENSMUSG00000099669.1	Gm29012	Annotated_lncRNA	ENSMUST00000102598	ENSMUSG00000057236	Rbbp4	WD40 repeat||Histone-binding protein RBBP4, N-terminal||G-protein beta WD-40 repeat||WD40 repeat, conserved site||WD40-repeat-containing domain	0.988656	5.06367e-07
ENSMUST00000187882.1	ENSMUSG00000099669.1	Gm29012	Annotated_lncRNA	ENSMUST00000063042	ENSMUSG00000045594	Glb1	Glycoside hydrolase, family 35, conserved site||Beta-galactosidase 1-like||Glycoside hydrolase, family 35||Galactose-binding domain-like||Glycoside hydrolase 35, catalytic domain||Glycoside hydrolase superfamily	0.97794	5.13816e-06
ENSMUST00000187882.1	ENSMUSG00000099669.1	Gm29012	Annotated_lncRNA	ENSMUST00000169314	ENSMUSG00000058258	Idi1	NUDIX hydrolase domain||NUDIX hydrolase domain-like||Isopentenyl-diphosphate delta-isomerase, type 1	0.965977	2.31354e-05
ENSMUST00000187882.1	ENSMUSG00000099669.1	Gm29012	Annotated_lncRNA	ENSMUST00000101168	ENSMUSG00000079029	Gm5662	RNA-binding domain, S1, IF1 type||Translation initiation factor 1A (eIF-1A)||Translation initiation factor 1A (eIF-1A), conserved site||Nucleic acid-binding, OB-fold	0.972563	1.09669e-05
ENSMUST00000187882.1	ENSMUSG00000099669.1	Gm29012	Annotated_lncRNA	ENSMUST00000169729	ENSMUSG00000023942	Slc29a1	Equilibrative nucleoside transporter||-||Major facilitator superfamily domain	-0.956115	5.58417e-05
ENSMUST00000187882.1	ENSMUSG00000099669.1	Gm29012	Annotated_lncRNA	ENSMUST00000145841	ENSMUSG00000028713	Cyp4b1	Cytochrome P450, E-class, group I||Cytochrome P450, conserved site||Cytochrome P450||Cytochrome P450, E-class, group II	0.972197	1.14825e-05
ENSMUST00000187882.1	ENSMUSG00000099669.1	Gm29012	Annotated_lncRNA	ENSMUST00000029568	ENSMUSG00000027956	Tmem144	TMEM144	0.954792	6.18804e-05
ENSMUST00000187882.1	ENSMUSG00000099669.1	Gm29012	Annotated_lncRNA	ENSMUST00000119103	ENSMUSG00000032066	Bco2	Carotenoid oxygenase	0.958491	4.60647e-05
ENSMUST00000187882.1	ENSMUSG00000099669.1	Gm29012	Annotated_lncRNA	ENSMUST00000149983	ENSMUSG00000028124	Gclm	-||NADP-dependent oxidoreductase domain	0.956837	5.27285e-05
ENSMUST00000187882.1	ENSMUSG00000099669.1	Gm29012	Annotated_lncRNA	ENSMUST00000029968	ENSMUSG00000028292	Rars2	DALR anticodon binding||Aminoacyl-tRNA synthetase, class 1a, anticodon-binding||Arginine-tRNA ligase||-||Aminoacyl-tRNA synthetase, class I, conserved site||Arginyl tRNA synthetase N-terminal domain	0.953495	6.82314e-05
ENSMUST00000187882.1	ENSMUSG00000099669.1	Gm29012	Annotated_lncRNA	ENSMUST00000043598	ENSMUSG00000038217	Tlcd2	TRAM/LAG1/CLN8 homology domain	0.963866	2.85025e-05
ENSMUST00000187882.1	ENSMUSG00000099669.1	Gm29012	Annotated_lncRNA	ENSMUST00000107049	ENSMUSG00000028088	Fmo5	Flavin monooxygenase-like||Flavin monooxygenase FMO||Dimethylaniline monooxygenase, N-oxide-forming||Flavin monooxygenase (FMO) 5	0.957959	4.81418e-05
ENSMUST00000187882.1	ENSMUSG00000099669.1	Gm29012	Annotated_lncRNA	ENSMUST00000026613	ENSMUSG00000025534	Gusb	Glycoside hydrolase, family 2, immunoglobulin-like beta-sandwich||Glycoside hydrolase family 2, catalytic domain||Glycoside hydrolase, family 2||Glycoside hydrolase, family 2, conserved site||Glycoside hydrolase superfamily||Glycosyl hydrolases family 2, sugar binding domain||Glycoside hydrolase, family 2, active site||Galactose-binding domain-like	0.951891	7.67103e-05
ENSMUST00000187882.1	ENSMUSG00000099669.1	Gm29012	Annotated_lncRNA	ENSMUST00000047815	ENSMUSG00000039463	Slc9a8	Na+/H+ exchanger||Cation/H+ exchanger	0.975733	7.15806e-06
ENSMUST00000187882.1	ENSMUSG00000099669.1	Gm29012	Annotated_lncRNA	ENSMUST00000112132	ENSMUSG00000030359	Pzp	Alpha-macroglobulin, receptor-binding||Alpha-macroglobulin complement component||Alpha-2-macroglobulin, N-terminal||Alpha-2-macroglobulin, conserved site||Alpha-2-macroglobulin, N-terminal 2||Alpha-2-macroglobulin, thiol-ester bond-forming||Terpenoid cyclases/protein prenyltransferase alpha-alpha toroid||Immunoglobulin E-set||Alpha-2-macroglobulin	0.979276	4.13446e-06
ENSMUST00000187882.1	ENSMUSG00000099669.1	Gm29012	Annotated_lncRNA	ENSMUST00000034178	ENSMUSG00000031725	Ces1f	Alpha/Beta hydrolase fold||Carboxylesterase type B, conserved site||Carboxylesterase type B, active site||-||Carboxylesterase, type B	0.966876	2.10857e-05
ENSMUST00000187882.1	ENSMUSG00000099669.1	Gm29012	Annotated_lncRNA	ENSMUST00000081541	ENSMUSG00000060317	Acnat2	BAAT/Acyl-CoA thioester hydrolase C-terminal||Acyl-CoA thioester hydrolase/bile acid-CoA amino acid N-acetyltransferase||Acyl-CoA thioesterase, long chain||Alpha/Beta hydrolase fold	-0.953103	7.02397e-05
ENSMUST00000187882.1	ENSMUSG00000099669.1	Gm29012	Annotated_lncRNA	ENSMUST00000102707	ENSMUSG00000028713	Cyp4b1	Cytochrome P450, E-class, group I||Cytochrome P450, conserved site||Cytochrome P450||Cytochrome P450, E-class, group II	0.965798	2.35603e-05
ENSMUST00000187882.1	ENSMUSG00000099669.1	Gm29012	Annotated_lncRNA	ENSMUST00000045706	ENSMUSG00000041301	Cftr	AAA+ ATPase domain||ABC transporter, conserved site||ABC transporter type 1, transmembrane domain||P-loop containing nucleoside triphosphate hydrolase||ABC transporter-like||CFTR regulator domain||Cystic fibrosis transmembrane conductance regulator	0.950581	8.4163e-05
ENSMUST00000187882.1	ENSMUSG00000099669.1	Gm29012	Annotated_lncRNA	ENSMUST00000006027	ENSMUSG00000005873	Reep5	TB2/DP1/HVA22-related protein	0.969211	1.63624e-05
ENSMUST00000187882.1	ENSMUSG00000099669.1	Gm29012	Annotated_lncRNA	ENSMUST00000106921	ENSMUSG00000057722	Lepr	Fibronectin type III||Immunoglobulin C2-set-like, ligand-binding||-||Long hematopoietin receptor, Gp130 family 2, conserved site||Short hematopoietin receptor, family 1, conserved site||Immunoglobulin-like domain	0.963738	2.88545e-05
ENSMUST00000187882.1	ENSMUSG00000099669.1	Gm29012	Annotated_lncRNA	ENSMUST00000047702	ENSMUSG00000038304	Cd160	Immunoglobulin V-set domain||Immunoglobulin subtype||Immunoglobulin-like domain	0.988011	6.14093e-07
ENSMUST00000187882.1	ENSMUSG00000099669.1	Gm29012	Annotated_lncRNA	ENSMUST00000079028	ENSMUSG00000022325	Pop1	POPLD||Ribonuclease P/MRP, subunit POP1	0.95532	5.94166e-05
ENSMUST00000187882.1	ENSMUSG00000099669.1	Gm29012	Annotated_lncRNA	ENSMUST00000081440	ENSMUSG00000030340	Scnn1a	Na+ channel, amiloride-sensitive, conserved site||Epithelial sodium channel||Na+ channel, amiloride-sensitive	-0.959308	4.30037e-05
ENSMUST00000187882.1	ENSMUSG00000099669.1	Gm29012	Annotated_lncRNA	ENSMUST00000037488	ENSMUSG00000035954	Dock4	SH3 domain||DHR-2 domain||Variant SH3 domain||DHR-1 domain||Dedicator of cytokinesis C-terminal	0.962952	3.10787e-05
ENSMUST00000187882.1	ENSMUSG00000099669.1	Gm29012	Annotated_lncRNA	ENSMUST00000096495	ENSMUSG00000064127	Med14	Mediator complex, subunit Med14||-	0.992141	1.40601e-07
ENSMUST00000187882.1	ENSMUSG00000099669.1	Gm29012	Annotated_lncRNA	ENSMUST00000027131	ENSMUSG00000025986	Slc39a10	Zinc/iron permease||-	0.963627	2.91609e-05
ENSMUST00000187882.1	ENSMUSG00000099669.1	Gm29012	Annotated_lncRNA	ENSMUST00000023559	ENSMUSG00000022853	Ehhadh	3-hydroxyacyl-CoA dehydrogenase, C-terminal||6-phosphogluconate dehydrogenase C-terminal domain-like||Crotonase superfamily||Enoyl-CoA hydratase/isomerase, conserved site||ClpP/crotonase-like domain||3-hydroxyacyl-CoA dehydrogenase, conserved site||3-hydroxyacyl-CoA dehydrogenase, NAD binding	0.974302	8.73575e-06
ENSMUST00000187882.1	ENSMUSG00000099669.1	Gm29012	Annotated_lncRNA	ENSMUST00000002502	ENSMUSG00000002428	Hltf	Zinc finger, RING-type||Helicase, C-terminal||Zinc finger, RING-type, conserved site||P-loop containing nucleoside triphosphate hydrolase||SNF2-related, N-terminal domain||Helicase superfamily 1/2, ATP-binding domain||HIRAN domain	0.950193	8.64618e-05
ENSMUST00000187882.1	ENSMUSG00000099669.1	Gm29012	Annotated_lncRNA	ENSMUST00000034285	ENSMUSG00000031827	Cotl1	Actin-depolymerising factor homology domain	-0.966992	2.08299e-05
ENSMUST00000192407.1	ENSMUSG00000097845.2	A230020J21Rik	Annotated_lncRNA	ENSMUST00000126534	ENSMUSG00000033685	Ucp2	Mitochondrial brown fat uncoupling protein||Mitochondrial substrate/solute carrier	0.975143	7.78115e-06
ENSMUST00000192407.1	ENSMUSG00000097845.2	A230020J21Rik	Annotated_lncRNA	ENSMUST00000032508	ENSMUSG00000030357	Fkbp4	Tetratricopeptide repeat 1||Tetratricopeptide repeat||Tetratricopeptide repeat-containing domain||FKBP-type peptidyl-prolyl cis-trans isomerase domain	-0.979467	4.00334e-06
ENSMUST00000192407.1	ENSMUSG00000097845.2	A230020J21Rik	Annotated_lncRNA	ENSMUST00000139848	ENSMUSG00000034472	Rasd2	P-loop containing nucleoside triphosphate hydrolase||Small GTPase superfamily||Small GTP-binding protein domain||Small GTPase superfamily, Rho type||Ran GTPase||Small GTPase superfamily, Rab type||Small GTPase superfamily, Ras type	0.961699	3.48735e-05
ENSMUST00000192407.1	ENSMUSG00000097845.2	A230020J21Rik	Annotated_lncRNA	ENSMUST00000018186	ENSMUSG00000018042	Cyb5r3	Flavoprotein pyridine nucleotide cytochrome reductase||Oxidoreductase, FAD-binding domain||Riboflavin synthase-like beta-barrel||Ferredoxin reductase-type FAD-binding domain||Oxidoreductase FAD/NAD(P)-binding||NADH:cytochrome b5 reductase (CBR)	-0.970598	1.39442e-05
ENSMUST00000192407.1	ENSMUSG00000097845.2	A230020J21Rik	Annotated_lncRNA	ENSMUST00000020524	ENSMUSG00000020282	Rhbdf1	-||Rhomboid serine protease||Peptidase S54, rhomboid domain	0.961758	3.4687e-05
ENSMUST00000192407.1	ENSMUSG00000097845.2	A230020J21Rik	Annotated_lncRNA	ENSMUST00000118732	ENSMUSG00000050074	Spink8	-||Kazal domain	0.954679	6.24141e-05
ENSMUST00000192407.1	ENSMUSG00000097845.2	A230020J21Rik	Annotated_lncRNA	ENSMUST00000022995	ENSMUSG00000022366	Slc22a22	Major facilitator superfamily||Major facilitator superfamily domain||Sugar transporter, conserved site	-0.956819	5.28075e-05
ENSMUST00000192407.1	ENSMUSG00000097845.2	A230020J21Rik	Annotated_lncRNA	ENSMUST00000007980	ENSMUSG00000007836	Hnrnpa0	RNA recognition motif domain	0.96476	2.61328e-05
ENSMUST00000192407.1	ENSMUSG00000097845.2	A230020J21Rik	Annotated_lncRNA	ENSMUST00000038144	ENSMUSG00000042379	Esm1	Insulin-like growth factor-binding protein, IGFBP||Insulin-like growth factor binding protein, N-terminal	-0.958464	4.61676e-05
ENSMUST00000192407.1	ENSMUSG00000097845.2	A230020J21Rik	Annotated_lncRNA	ENSMUST00000033775	ENSMUSG00000031402	Mpp1	PDZ domain||Guanylate kinase, conserved site||P-loop containing nucleoside triphosphate hydrolase||SH3 domain||Guanylate kinase-like domain||-||Variant SH3 domain||Guanylate kinase/L-type calcium channel beta subunit	-0.952163	7.52233e-05
ENSMUST00000192407.1	ENSMUSG00000097845.2	A230020J21Rik	Annotated_lncRNA	ENSMUST00000132034	ENSMUSG00000038803	Ost4	Oligosaccaryltransferase	-0.97305	1.03053e-05
ENSMUST00000192407.1	ENSMUSG00000097845.2	A230020J21Rik	Annotated_lncRNA	ENSMUST00000108199	ENSMUSG00000055373	Fut9	Glycosyl transferase family 10	-0.979715	3.83724e-06
ENSMUST00000192407.1	ENSMUSG00000097845.2	A230020J21Rik	Annotated_lncRNA	ENSMUST00000030299	ENSMUSG00000052520	Cyp2j5	Cytochrome P450, E-class, group I||Cytochrome P450, E-class, group I, CYP2J-like||Cytochrome P450, conserved site||Cytochrome P450	-0.950349	8.55336e-05
ENSMUST00000192407.1	ENSMUSG00000097845.2	A230020J21Rik	Annotated_lncRNA	ENSMUST00000109566	ENSMUSG00000061689	Dlgap4	SAPAP family||-	0.954737	6.21376e-05
ENSMUST00000192407.1	ENSMUSG00000097845.2	A230020J21Rik	Annotated_lncRNA	ENSMUST00000072113	ENSMUSG00000062373	Tmem65	Transmembrane protein 65	0.959677	4.1671e-05
ENSMUST00000192407.1	ENSMUSG00000097845.2	A230020J21Rik	Annotated_lncRNA	ENSMUST00000199406	ENSMUSG00000029472	Anapc5	-||Anaphase-promoting complex subunit 5	-0.980103	3.58816e-06
ENSMUST00000192407.1	ENSMUSG00000097845.2	A230020J21Rik	Annotated_lncRNA	ENSMUST00000151390	ENSMUSG00000034674	Tdg	Uracil-DNA glycosylase-like||Thymine-DNA glycosylase	0.961303	3.61379e-05
ENSMUST00000192407.1	ENSMUSG00000097845.2	A230020J21Rik	Annotated_lncRNA	ENSMUST00000071522	ENSMUSG00000057913	Gm10032	-	0.962786	3.15644e-05
ENSMUST00000192407.1	ENSMUSG00000097845.2	A230020J21Rik	Annotated_lncRNA	ENSMUST00000028815	ENSMUSG00000027340	Slc23a2	Xanthine/uracil/vitamin C permease||Xanthine/uracil permease||-	0.969761	1.53698e-05
ENSMUST00000192407.1	ENSMUSG00000097845.2	A230020J21Rik	Annotated_lncRNA	ENSMUST00000077290	ENSMUSG00000025823	Pdia4	Thioredoxin, conserved site||Protein disulphide isomerase||Thioredoxin domain||Disulphide isomerase||Protein disulphide-isomerase A4||Thioredoxin-like fold	-0.950197	8.64391e-05
ENSMUST00000192407.1	ENSMUSG00000097845.2	A230020J21Rik	Annotated_lncRNA	ENSMUST00000040042	ENSMUSG00000015083	C8g	Lipocalin||Lipocalin family conserved site||Calycin-like||Alpha-1-microglobulin||Lipocalin/cytosolic fatty-acid binding domain	-0.95922	4.3328e-05
ENSMUST00000192407.1	ENSMUSG00000097845.2	A230020J21Rik	Annotated_lncRNA	ENSMUST00000025567	ENSMUSG00000024665	Fads2	Fatty acid desaturase domain||Fatty acid desaturase||Cytochrome b5-like heme/steroid binding domain	-0.951872	7.681e-05
ENSMUST00000192407.1	ENSMUSG00000097845.2	A230020J21Rik	Annotated_lncRNA	ENSMUST00000106758	ENSMUSG00000028621	Cyb5rl	Oxidoreductase-like, N-terminal||Oxidoreductase, FAD-binding domain||Flavoprotein pyridine nucleotide cytochrome reductase||Riboflavin synthase-like beta-barrel||Ferredoxin reductase-type FAD-binding domain||-||Oxidoreductase FAD/NAD(P)-binding||NADH:cytochrome b5 reductase (CBR)	0.960744	3.79761e-05
ENSMUST00000192407.1	ENSMUSG00000097845.2	A230020J21Rik	Annotated_lncRNA	ENSMUST00000037726	ENSMUSG00000041594	Tmtc4	Tetratricopeptide repeat||-||Domain of unknown function DUF1736||Tetratricopeptide repeat-containing domain	-0.968391	1.79238e-05
ENSMUST00000192407.1	ENSMUSG00000097845.2	A230020J21Rik	Annotated_lncRNA	ENSMUST00000138505	ENSMUSG00000061589	Dot1l	Histone H3-K79 methyltransferase, metazoa||Histone methylation DOT1||Histone-lysine N-methyltransferase DOT1 domain||-||S-adenosyl-L-methionine-dependent methyltransferase	0.952518	7.33098e-05
ENSMUST00000192407.1	ENSMUSG00000097845.2	A230020J21Rik	Annotated_lncRNA	ENSMUST00000163083	ENSMUSG00000024646	Cyb5a	Cytochrome b5, heme-binding site||Cytochrome b5-like heme/steroid binding domain	-0.964489	2.68349e-05
ENSMUST00000192407.1	ENSMUSG00000097845.2	A230020J21Rik	Annotated_lncRNA	ENSMUST00000043464	ENSMUSG00000038545	Cul7	Cullin protein, neddylation domain||Galactose-binding domain-like||Anaphase-promoting complex, subunit 10/DOC domain||Cullin, conserved site||Armadillo-type fold||Cullin, N-terminal||CPH domain||Cullin homology	0.962151	3.34701e-05
ENSMUST00000192407.1	ENSMUSG00000097845.2	A230020J21Rik	Annotated_lncRNA	ENSMUST00000072403	ENSMUSG00000049152	Ugt3a2	UDP-glucuronosyl/UDP-glucosyltransferase	-0.951846	7.69564e-05
ENSMUST00000192407.1	ENSMUSG00000097845.2	A230020J21Rik	Annotated_lncRNA	ENSMUST00000110020	ENSMUSG00000021190	Lgmn	Peptidase C13, legumain	0.960606	3.84396e-05
ENSMUST00000192407.1	ENSMUSG00000097845.2	A230020J21Rik	Annotated_lncRNA	ENSMUST00000105502	ENSMUSG00000048756	Foxo3	-||Fork head domain	0.950633	8.38589e-05
ENSMUST00000192407.1	ENSMUSG00000097845.2	A230020J21Rik	Annotated_lncRNA	ENSMUST00000039559	ENSMUSG00000040152	Thbs1	Thrombospondin type-1 (TSP1) repeat||Thrombospondin, C-terminal||Laminin G domain||EGF-like, conserved site||EGF-like calcium-binding domain||VWFC domain||EGF-like domain||Concanavalin A-like lectin/glucanase domain||Thrombospondin, type 3-like repeat||Thrombospondin, type 3 repeat	0.957476	5.00783e-05
ENSMUST00000192407.1	ENSMUSG00000097845.2	A230020J21Rik	Annotated_lncRNA	ENSMUST00000099396	ENSMUSG00000054027	Nt5dc3	HAD-like domain||Purine 5'-nucleotidase||HAD-superfamily hydrolase, subfamily IG, 5'-nucleotidase	0.982762	2.17759e-06
ENSMUST00000192407.1	ENSMUSG00000097845.2	A230020J21Rik	Annotated_lncRNA	ENSMUST00000036928	ENSMUSG00000038776	Ephx1	Epoxide hydrolase-like||Epoxide hydrolase, N-terminal||Alpha/beta hydrolase fold-1||Alpha/Beta hydrolase fold||Epoxide hydrolase	0.953496	6.82282e-05
ENSMUST00000192407.1	ENSMUSG00000097845.2	A230020J21Rik	Annotated_lncRNA	ENSMUST00000027802	ENSMUSG00000026520	Pycr2	Pyrroline-5-carboxylate reductase, dimerisation domain||Pyrroline-5-carboxylate reductase||6-phosphogluconate dehydrogenase C-terminal domain-like||Pyrroline-5-carboxylate reductase, catalytic, N-terminal	0.9608	3.77902e-05
ENSMUST00000192407.1	ENSMUSG00000097845.2	A230020J21Rik	Annotated_lncRNA	ENSMUST00000029046	ENSMUSG00000027533	Fabp5	Lipocalin/cytosolic fatty-acid binding domain||Cytosolic fatty-acid binding||Calycin-like	-0.95454	6.30802e-05
ENSMUST00000192407.1	ENSMUSG00000097845.2	A230020J21Rik	Annotated_lncRNA	ENSMUST00000068023	ENSMUSG00000054793	Cadm4	Neurexin/syndecan/glycophorin C||Immunoglobulin V-set domain||Immunoglobulin subtype||Immunoglobulin-like domain||Immunoglobulin subtype 2||CD80-like, immunoglobulin C2-set	0.967328	2.01045e-05
ENSMUST00000192407.1	ENSMUSG00000097845.2	A230020J21Rik	Annotated_lncRNA	ENSMUST00000042025	ENSMUSG00000033420	Antxr1	von Willebrand factor, type A||Anthrax toxin receptor||Anthrax toxin receptor, extracellular||Anthrax toxin receptor, C-terminal	0.953452	6.84513e-05
ENSMUST00000192407.1	ENSMUSG00000097845.2	A230020J21Rik	Annotated_lncRNA	ENSMUST00000078509	ENSMUSG00000024039	Cbs	Tryptophan synthase beta subunit-like PLP-dependent enzyme||Cysteine synthase/cystathionine beta-synthase, pyridoxal-phosphate attachment site||-||CBS domain||Cystathionine beta-synthase	-0.974523	8.47695e-06
ENSMUST00000192407.1	ENSMUSG00000097845.2	A230020J21Rik	Annotated_lncRNA	ENSMUST00000113585	ENSMUSG00000033174	Mgll	Alpha/Beta hydrolase fold||Serine aminopeptidase, S33||Alpha/beta hydrolase fold-1||-	0.964343	2.72201e-05
ENSMUST00000192407.1	ENSMUSG00000097845.2	A230020J21Rik	Annotated_lncRNA	ENSMUST00000164566	ENSMUSG00000038528	BC021785	-||Major facilitator superfamily domain||Major facilitator superfamily	-0.957845	4.85912e-05
ENSMUST00000192407.1	ENSMUSG00000097845.2	A230020J21Rik	Annotated_lncRNA	ENSMUST00000115491	ENSMUSG00000048216	Gpr85	GPCR, rhodopsin-like, 7TM||G protein-coupled receptor, rhodopsin-like	0.976991	5.94868e-06
ENSMUST00000192407.1	ENSMUSG00000097845.2	A230020J21Rik	Annotated_lncRNA	ENSMUST00000027233	ENSMUSG00000026065	Slc9a4	Na+/H+ exchanger||Cation/H+ exchanger||Na+/H+ exchanger, isoform 2 (NHE2)	0.978645	4.58911e-06
ENSMUST00000192407.1	ENSMUSG00000097845.2	A230020J21Rik	Annotated_lncRNA	ENSMUST00000085635	ENSMUSG00000066595	Mfsd7b	Major facilitator superfamily domain||Major facilitator superfamily	0.987683	6.74707e-07
ENSMUST00000192407.1	ENSMUSG00000097845.2	A230020J21Rik	Annotated_lncRNA	ENSMUST00000023465	ENSMUSG00000022779	Top3b	DNA topoisomerase, type IA, active site||DNA topoisomerase, type IA, core domain||DNA topoisomerase, type IA, central||Toprim domain||DNA topoisomerase, type IA||DNA topoisomerase, type IA, DNA-binding domain||DNA topoisomerase, type IA, domain 2||-	0.953142	7.00395e-05
ENSMUST00000192407.1	ENSMUSG00000097845.2	A230020J21Rik	Annotated_lncRNA	ENSMUST00000093852	ENSMUSG00000066687	Zbtb16	Zinc finger, C2H2||Zinc finger, C2H2-like||BTB/POZ domain||POZ domain	0.951486	7.89599e-05
ENSMUST00000192407.1	ENSMUSG00000097845.2	A230020J21Rik	Annotated_lncRNA	ENSMUST00000029876	ENSMUSG00000028222	Calb1	EF-hand domain pair||EF-hand domain||EF-Hand 1, calcium-binding site	0.956813	5.28306e-05
ENSMUST00000192407.1	ENSMUSG00000097845.2	A230020J21Rik	Annotated_lncRNA	ENSMUST00000034609	ENSMUSG00000032098	Treh	Glycoside hydrolase, family 37, conserved site||Glycoside hydrolase, family 37||Six-hairpin glycosidase-like	-0.952455	7.36493e-05
ENSMUST00000192407.1	ENSMUSG00000097845.2	A230020J21Rik	Annotated_lncRNA	ENSMUST00000109313	ENSMUSG00000078937	Cpt1b	-||Acyltransferase ChoActase/COT/CPT	0.958066	4.77193e-05
ENSMUST00000192407.1	ENSMUSG00000097845.2	A230020J21Rik	Annotated_lncRNA	ENSMUST00000116402	ENSMUSG00000021255	Esrrb	Nuclear hormone receptor, ligand-binding domain||Zinc finger, nuclear hormone receptor-type||Oestrogen receptor/oestrogen-related receptor||Nuclear hormone receptor||Oestrogen-related receptor	0.952365	7.41304e-05
ENSMUST00000192407.1	ENSMUSG00000097845.2	A230020J21Rik	Annotated_lncRNA	ENSMUST00000032177	ENSMUSG00000030089	Slc41a3	SLC41 divalent cation transporters, integral membrane domain	0.950029	8.74521e-05
ENSMUST00000192407.1	ENSMUSG00000097845.2	A230020J21Rik	Annotated_lncRNA	ENSMUST00000040656	ENSMUSG00000038286	Bphl	Alpha/beta hydrolase fold-1||Alpha/Beta hydrolase fold	-0.950778	8.30067e-05
ENSMUST00000192407.1	ENSMUSG00000097845.2	A230020J21Rik	Annotated_lncRNA	ENSMUST00000042744	ENSMUSG00000040998	Npnt	Insulin-like growth factor binding protein, N-terminal||MAM domain||EGF-like, conserved site||EGF-type aspartate/asparagine hydroxylation site||EGF-like calcium-binding domain||EGF-like calcium-binding, conserved site||EGF-like domain||Concanavalin A-like lectin/glucanase domain	0.959277	4.31162e-05
ENSMUST00000192407.1	ENSMUSG00000097845.2	A230020J21Rik	Annotated_lncRNA	ENSMUST00000040344	ENSMUSG00000034707	Gns	Alkaline-phosphatase-like, core domain||Sulfatase||Sulfatase, conserved site||N-acetylglucosamine-6-sulfatase	0.969013	1.67297e-05
ENSMUST00000192407.1	ENSMUSG00000097845.2	A230020J21Rik	Annotated_lncRNA	ENSMUST00000069620	ENSMUSG00000055866	Per2	PAS fold-3||Period circadian-like, C-terminal||PAS domain	0.957317	5.0731e-05
ENSMUST00000192407.1	ENSMUSG00000097845.2	A230020J21Rik	Annotated_lncRNA	ENSMUST00000022861	ENSMUSG00000072664	Ugt3a1	-||UDP-glucuronosyl/UDP-glucosyltransferase	-0.955868	5.69371e-05
ENSMUST00000192407.1	ENSMUSG00000097845.2	A230020J21Rik	Annotated_lncRNA	ENSMUST00000103194	ENSMUSG00000000805	Car4	Alpha carbonic anhydrase||Carbonic anhydrase, alpha-class, conserved site||-	-0.967555	1.96229e-05
ENSMUST00000192407.1	ENSMUSG00000097845.2	A230020J21Rik	Annotated_lncRNA	ENSMUST00000077367	ENSMUSG00000028048	Gba	Glycoside hydrolase superfamily||Glycoside hydrolase, family 30	-0.962652	3.19601e-05
ENSMUST00000192407.1	ENSMUSG00000097845.2	A230020J21Rik	Annotated_lncRNA	ENSMUST00000183038	ENSMUSG00000058690	Ccser2	-	-0.957141	5.14564e-05
ENSMUST00000192407.1	ENSMUSG00000097845.2	A230020J21Rik	Annotated_lncRNA	ENSMUST00000041874	ENSMUSG00000042684	Npl	DapA-like	0.961275	3.62272e-05
ENSMUST00000192407.1	ENSMUSG00000097845.2	A230020J21Rik	Annotated_lncRNA	ENSMUST00000026625	ENSMUSG00000025545	Clybl	HpcH/HpaI aldolase/citrate lyase domain||Citrate lyase beta subunit-like||Pyruvate/Phosphoenolpyruvate kinase-like domain	-0.951963	7.63127e-05
ENSMUST00000192407.1	ENSMUSG00000097845.2	A230020J21Rik	Annotated_lncRNA	ENSMUST00000072406	ENSMUSG00000024127	Prepl	Alpha/Beta hydrolase fold||Peptidase S9A, prolyl oligopeptidase||Peptidase S9A, N-terminal domain||Peptidase S9, prolyl oligopeptidase, catalytic domain	-0.965801	2.35536e-05
ENSMUST00000192407.1	ENSMUSG00000097845.2	A230020J21Rik	Annotated_lncRNA	ENSMUST00000050897	ENSMUSG00000043065	Spice1	-	-0.955535	5.84359e-05
ENSMUST00000192407.1	ENSMUSG00000097845.2	A230020J21Rik	Annotated_lncRNA	ENSMUST00000063318	ENSMUSG00000020102	Slc16a7	Major facilitator superfamily domain||Major facilitator superfamily||Monocarboxylate transporter	0.951852	7.69231e-05
ENSMUST00000192407.1	ENSMUSG00000097845.2	A230020J21Rik	Annotated_lncRNA	ENSMUST00000073339	ENSMUSG00000006373	Pgrmc1	Cytochrome b5-like heme/steroid binding domain	0.957843	4.85993e-05
ENSMUST00000192407.1	ENSMUSG00000097845.2	A230020J21Rik	Annotated_lncRNA	ENSMUST00000173287	ENSMUSG00000070469	Adamtsl3	Immunoglobulin subtype 2||Immunoglobulin I-set||Immunoglobulin subtype||PLAC||-||Thrombospondin type-1 (TSP1) repeat||Immunoglobulin||Immunoglobulin-like domain||Peptidase M12B, ADAM-TS	0.954967	6.10547e-05
ENSMUST00000192407.1	ENSMUSG00000097845.2	A230020J21Rik	Annotated_lncRNA	ENSMUST00000019386	ENSMUSG00000005251	Ripk4	Protein kinase domain||Serine/threonine-protein kinase, active site||Protein kinase-like domain||Serine/threonine/dual specificity protein kinase, catalytic domain||Ankyrin repeat-containing domain||Ankyrin repeat||Protein kinase, ATP binding site	0.952647	7.26238e-05
ENSMUST00000192407.1	ENSMUSG00000097845.2	A230020J21Rik	Annotated_lncRNA	ENSMUST00000031255	ENSMUSG00000029314	Agpat9	-||Phospholipid/glycerol acyltransferase	0.950111	8.69539e-05
LNC_000060	XLOC_007288	--	Novel_lncRNA	ENSMUST00000030412	ENSMUSG00000028657	Ppt1	Alpha/Beta hydrolase fold||Palmitoyl protein thioesterase||-	-0.951726	7.76222e-05
LNC_000060	XLOC_007288	--	Novel_lncRNA	ENSMUST00000004203	ENSMUSG00000004100	Ppan	Anticodon-binding||Brix domain	0.957957	4.81474e-05
LNC_000060	XLOC_007288	--	Novel_lncRNA	ENSMUST00000030739	ENSMUSG00000028906	Epb41	SAB domain||Band 4.1 domain||FERM, N-terminal||FERM adjacent (FA)||Band 4.1, C-terminal||FERM conserved site||FERM central domain||Ubiquitin-related domain||Ezrin/radixin/moesin-like||FERM domain||FERM, C-terminal PH-like domain	0.964315	2.72954e-05
LNC_000060	XLOC_007288	--	Novel_lncRNA	ENSMUST00000001415	ENSMUSG00000006050	Sra1	WW domain||-||PTB/PI domain||Steroid receptor RNA activator-protein/coat protein complex II, Sec31	0.990719	2.51323e-07
LNC_000060	XLOC_007288	--	Novel_lncRNA	ENSMUST00000027379	ENSMUSG00000026187	Xrcc5	Ku70/Ku80 C-terminal arm||Ku, C-terminal||Ku80||Ku70/Ku80, N-terminal alpha/beta||Ku70/Ku80 beta-barrel domain||SPOC-like, C-terminal domain||von Willebrand factor, type A	-0.969318	1.61663e-05
LNC_000060	XLOC_007288	--	Novel_lncRNA	ENSMUST00000031058	ENSMUSG00000029166	Mapre3	Calponin homology domain||EB1, C-terminal	0.953677	6.7313e-05
LNC_000060	XLOC_007288	--	Novel_lncRNA	ENSMUST00000029325	ENSMUSG00000027761	Aadac	Lipase, GDXG, active site||Alpha/Beta hydrolase fold||Arylacetamide deacetylase||Alpha/beta hydrolase fold-3	-0.952959	7.09875e-05
LNC_000060	XLOC_007288	--	Novel_lncRNA	ENSMUST00000042125	ENSMUSG00000033257	Ttll4	Tubulin-tyrosine ligase/Tubulin polyglutamylase||-	0.973479	9.74628e-06
LNC_000060	XLOC_007288	--	Novel_lncRNA	ENSMUST00000025815	ENSMUSG00000024878	Cbwd1	Cobalamin (vitamin B12) biosynthesis CobW-like, C-terminal||CobW/HypB/UreG domain||P-loop containing nucleoside triphosphate hydrolase	-0.96301	3.09102e-05
LNC_000060	XLOC_007288	--	Novel_lncRNA	ENSMUST00000015545	ENSMUSG00000015401	Tmem27	-	-0.967948	1.8811e-05
LNC_000060	XLOC_007288	--	Novel_lncRNA	ENSMUST00000111978	ENSMUSG00000061288	Taok3	Serine/threonine-protein kinase, active site||Protein kinase domain||Protein kinase-like domain||-||Serine/threonine/dual specificity protein kinase, catalytic domain||Protein kinase, ATP binding site	0.960389	3.91769e-05
LNC_000060	XLOC_007288	--	Novel_lncRNA	ENSMUST00000021628	ENSMUSG00000021207	Akr1c21	Aldo/keto reductase subgroup||NADP-dependent oxidoreductase domain||Aldo/keto reductase, conserved site	-0.983171	2.00256e-06
LNC_000060	XLOC_007288	--	Novel_lncRNA	ENSMUST00000167360	ENSMUSG00000032842	Abcc10	ABC transporter type 1, transmembrane domain||ABC transporter-like||P-loop containing nucleoside triphosphate hydrolase||AAA+ ATPase domain||ABC transporter, conserved site	0.958117	4.75159e-05
LNC_000060	XLOC_007288	--	Novel_lncRNA	ENSMUST00000038379	ENSMUSG00000034820	Cpsf7	RNA recognition motif domain	0.955868	5.69345e-05
LNC_000060	XLOC_007288	--	Novel_lncRNA	ENSMUST00000025749	ENSMUSG00000024830	Rps6kb2	Protein kinase, ATP binding site||Protein kinase-like domain||Serine/threonine-protein kinase, active site||Protein kinase, C-terminal||Serine/threonine/dual specificity protein kinase, catalytic domain||Ribosomal protein S6 kinase||AGC-kinase, C-terminal||Protein kinase domain	0.951608	7.82753e-05
LNC_000060	XLOC_007288	--	Novel_lncRNA	ENSMUST00000034911	ENSMUSG00000032357	Tinag	Cysteine peptidase, asparagine active site||Peptidase C1A, papain C-terminal||Somatomedin B domain	-0.950056	8.72889e-05
LNC_000060	XLOC_007288	--	Novel_lncRNA	ENSMUST00000085684	ENSMUSG00000038780	Smurf1	C2 domain||E3 ubiquitin-protein ligase, SMURF1 type||WW domain||HECT domain	0.958834	4.47626e-05
LNC_000060	XLOC_007288	--	Novel_lncRNA	ENSMUST00000043042	ENSMUSG00000041143	Tmco4	Alpha/Beta hydrolase fold||Protein of unknown function DUF726||-	0.950643	8.37967e-05
LNC_000060	XLOC_007288	--	Novel_lncRNA	ENSMUST00000107134	ENSMUSG00000059995	Atxn7l3	SCA7 domain||SAGA complex, Sgf11 subunit	0.971682	1.22395e-05
LNC_000065	XLOC_008229	--	Novel_lncRNA	ENSMUST00000084342	ENSMUSG00000063929	Cyp4a32	Cytochrome P450, E-class, group I||Cytochrome P450||Cytochrome P450, conserved site	0.950611	8.39866e-05
LNC_000065	XLOC_008229	--	Novel_lncRNA	ENSMUST00000147875	ENSMUSG00000072640	Lyrm9	Complex 1 LYR protein	0.954569	6.29383e-05
LNC_000065	XLOC_008229	--	Novel_lncRNA	ENSMUST00000165605	ENSMUSG00000038515	Grtp1	Rab-GTPase-TBC domain	-0.959484	4.2363e-05
LNC_000065	XLOC_008229	--	Novel_lncRNA	ENSMUST00000080141	ENSMUSG00000063296	Tmem117	TMEM117 protein	0.970034	1.48943e-05
LNC_000065	XLOC_008229	--	Novel_lncRNA	ENSMUST00000134710	ENSMUSG00000039578	Ccser1	-	-0.961661	3.49936e-05
LNC_000065	XLOC_008229	--	Novel_lncRNA	ENSMUST00000010198	ENSMUSG00000010054	Tusc2	Tumour suppressor candidate 2	-0.956417	5.45251e-05
LNC_000065	XLOC_008229	--	Novel_lncRNA	ENSMUST00000136026	ENSMUSG00000003824	Syce2	-	0.951961	7.63254e-05
LNC_000065	XLOC_008229	--	Novel_lncRNA	ENSMUST00000033290	ENSMUSG00000030986	Dhx32	Helicase-associated domain||P-loop containing nucleoside triphosphate hydrolase||-||Domain of unknown function DUF1605	-0.954982	6.09846e-05
LNC_000065	XLOC_008229	--	Novel_lncRNA	ENSMUST00000165017	ENSMUSG00000015176	Nolc1	SRP40, C-terminal||LIS1 homology motif	-0.95854	4.58772e-05
LNC_000065	XLOC_008229	--	Novel_lncRNA	ENSMUST00000206911	ENSMUSG00000006269	Atp6v1b1	ATPase, F1/V1/A1 complex, alpha/beta subunit, nucleotide-binding domain||ATPase, F1 complex alpha/beta subunit, N-terminal domain||P-loop containing nucleoside triphosphate hydrolase||-||ATPase, alpha/beta subunit, nucleotide-binding domain, active site||ATPase, F1/V1/A1 complex, alpha/beta subunit, C-terminal||ATPase, V1 complex, subunit B	0.980083	3.6006e-06
LNC_000065	XLOC_008229	--	Novel_lncRNA	ENSMUST00000002048	ENSMUSG00000001983	Taco1	YebC-like||Transcriptional regulator TACO1-like	-0.958192	4.72241e-05
LNC_000065	XLOC_008229	--	Novel_lncRNA	ENSMUST00000006137	ENSMUSG00000005981	Trap1	Heat shock protein Hsp90 family||-||Heat shock protein Hsp90, N-terminal||Ribosomal protein S5 domain 2-type fold||Histidine kinase-like ATPase, C-terminal domain	-0.950541	8.43986e-05
LNC_000065	XLOC_008229	--	Novel_lncRNA	ENSMUST00000026073	ENSMUSG00000025086	Trub1	Pseudouridine synthase II||Pseudouridine synthase, catalytic domain||tRNA pseudouridine synthase II, TruB	-0.95094	8.20702e-05
LNC_000065	XLOC_008229	--	Novel_lncRNA	ENSMUST00000130645	ENSMUSG00000027601	Mtfr1	Mitochondrial fission regulator 1||-	-0.959993	4.0549e-05
LNC_000065	XLOC_008229	--	Novel_lncRNA	ENSMUST00000171588	ENSMUSG00000054263	Lifr	Fibronectin type III||Long hematopoietin receptor, Gp130 family 2, conserved site	0.96029	3.95167e-05
LNC_000065	XLOC_008229	--	Novel_lncRNA	ENSMUST00000045303	ENSMUSG00000040447	Spns2	Major facilitator superfamily domain||Major facilitator superfamily||-	0.956524	5.40653e-05
LNC_000065	XLOC_008229	--	Novel_lncRNA	ENSMUST00000031621	ENSMUSG00000029617	Ccz1	Protein of unknown function DUF1712, fungi	-0.959819	4.11638e-05
LNC_000065	XLOC_008229	--	Novel_lncRNA	ENSMUST00000063814	ENSMUSG00000052102	Gnpda1	Glucosamine/galactosamine-6-phosphate isomerase||Glucosamine-6-phosphate isomerase||Glucosamine-6-phosphate isomerase, conserved site	-0.961302	3.61389e-05
LNC_000065	XLOC_008229	--	Novel_lncRNA	ENSMUST00000066568	ENSMUSG00000053870	Fpgt	Trimeric LpxA-like||Fucose-1-phosphate guanylyltransferase||L-fucokinase	-0.958531	4.5914e-05
LNC_000065	XLOC_008229	--	Novel_lncRNA	ENSMUST00000028190	ENSMUSG00000026842	Abl1	F-actin binding||SH2 domain||Protein kinase, ATP binding site||-||Protein kinase-like domain||Protein kinase domain||SH3 domain||Tyrosine-protein kinase, active site||Tyrosine-protein kinase, catalytic domain||Serine-threonine/tyrosine-protein kinase catalytic domain	0.972817	1.06183e-05
LNC_000065	XLOC_008229	--	Novel_lncRNA	ENSMUST00000077353	ENSMUSG00000032126	Hmbs	Porphobilinogen deaminase, C-terminal||Porphobilinogen deaminase, N-terminal||Porphobilinogen deaminase, dipyrromethane cofactor binding site||Porphobilinogen deaminase	-0.950548	8.43576e-05
LNC_000065	XLOC_008229	--	Novel_lncRNA	ENSMUST00000029711	ENSMUSG00000005640	Insrr	Fibronectin type III||Furin-like cysteine-rich domain||Protein kinase, ATP binding site||Protein kinase-like domain||Tyrosine-protein kinase, insulin-like receptor||Serine-threonine/tyrosine-protein kinase catalytic domain||Tyrosine-protein kinase, catalytic domain||Tyrosine-protein kinase, receptor class II, conserved site||Receptor L-domain||Protein kinase domain||Insulin-like growth factor bin…	0.969866	1.51868e-05
LNC_000065	XLOC_008229	--	Novel_lncRNA	ENSMUST00000044286	ENSMUSG00000039199	Zdhhc1	Zinc finger, DHHC-type, palmitoyltransferase	0.980303	3.46425e-06
LNC_000065	XLOC_008229	--	Novel_lncRNA	ENSMUST00000029069	ENSMUSG00000027552	E2f5	E2F/DP family, winged-helix DNA-binding domain	-0.965888	2.33471e-05
LNC_000065	XLOC_008229	--	Novel_lncRNA	ENSMUST00000061244	ENSMUSG00000029710	Ephb4	Sterile alpha motif domain||Tyrosine-protein kinase, receptor class V, conserved site||Ephrin receptor, transmembrane domain||Tyrosine-protein kinase, catalytic domain||Sterile alpha motif/pointed domain||Protein kinase, ATP binding site||Galactose-binding domain-like||Fibronectin type III||Protein kinase-like domain||Ephrin receptor ligand binding domain||Protein kinase domain||Tyrosine-protein …	0.954856	6.15783e-05
LNC_000065	XLOC_008229	--	Novel_lncRNA	ENSMUST00000097442	ENSMUSG00000026604	Ptpn14	Protein-tyrosine phosphatase-like||FERM, C-terminal PH-like domain||FERM domain||Ubiquitin-related domain||FERM conserved site||FERM central domain||Protein-tyrosine phosphatase, non-receptor type-14, -21||Protein-tyrosine phosphatase, catalytic||PTP type protein phosphatase||Band 4.1 domain||FERM, N-terminal||Tyrosine specific protein phosphatases domain||Protein-tyrosine phosphatase, active site	0.952885	7.13732e-05
LNC_000065	XLOC_008229	--	Novel_lncRNA	ENSMUST00000174143	ENSMUSG00000079495	Gm11128	GNAT domain||Acyl-CoA N-acyltransferase	-0.989062	4.45876e-07
LNC_000065	XLOC_008229	--	Novel_lncRNA	ENSMUST00000171324	ENSMUSG00000091387	Gcnt4	Glycosyl transferase, family 14	0.971791	1.20755e-05
LNC_000065	XLOC_008229	--	Novel_lncRNA	ENSMUST00000100167	ENSMUSG00000023088	Abcc1	ABC transporter type 1, transmembrane domain||-||ABC transporter-like||P-loop containing nucleoside triphosphate hydrolase||AAA+ ATPase domain||ABC transporter, conserved site||Multi drug resistance-associated protein	0.955477	5.87002e-05
LNC_000065	XLOC_008229	--	Novel_lncRNA	ENSMUST00000087511	ENSMUSG00000067365	Tmem128	-	-0.953102	7.02438e-05
LNC_000065	XLOC_008229	--	Novel_lncRNA	ENSMUST00000102660	ENSMUSG00000042272	Sestd1	CRAL-TRIO lipid binding domain	0.956557	5.39226e-05
LNC_000065	XLOC_008229	--	Novel_lncRNA	ENSMUST00000048064	ENSMUSG00000036523	Greb1	-	0.967095	2.0605e-05
LNC_000065	XLOC_008229	--	Novel_lncRNA	ENSMUST00000101029	ENSMUSG00000037679	Inf2	Formin, FH2 domain||Formin, FH3 domain||Rho GTPase-binding/formin homology 3 (GBD/FH3) domain||WH2 domain||Formin, GTPase-binding domain||Armadillo-type fold	0.95745	5.01862e-05
LNC_000065	XLOC_008229	--	Novel_lncRNA	ENSMUST00000029810	ENSMUSG00000053897	Slc39a8	Zinc/iron permease	-0.963501	2.95134e-05
LNC_000065	XLOC_008229	--	Novel_lncRNA	ENSMUST00000149359	ENSMUSG00000009569	Mkl2	RPEL repeat||-||SAP domain	0.962885	3.1275e-05
LNC_000065	XLOC_008229	--	Novel_lncRNA	ENSMUST00000110362	ENSMUSG00000022285	Ywhaz	14-3-3 protein||14-3-3 protein, conserved site||14-3-3 domain	-0.964786	2.60653e-05
LNC_000065	XLOC_008229	--	Novel_lncRNA	ENSMUST00000032419	ENSMUSG00000030282	Cmas	Acylneuraminate cytidylyltransferase||Nucleotide-diphospho-sugar transferases||HAD-like domain	-0.969485	1.58634e-05
LNC_000065	XLOC_008229	--	Novel_lncRNA	ENSMUST00000021550	ENSMUSG00000021125	Arg2	Ureohydrolase||Arginase||Ureohydrolase, manganese-binding site	0.958479	4.61099e-05
LNC_000065	XLOC_008229	--	Novel_lncRNA	ENSMUST00000097672	ENSMUSG00000073633	Fbxo36	F-box domain	-0.957813	4.87197e-05
LNC_000065	XLOC_008229	--	Novel_lncRNA	ENSMUST00000049185	ENSMUSG00000033126	Ybey	Endoribonuclease YbeY, conserved site||Endoribonuclease YbeY	-0.97048	1.4139e-05
LNC_000065	XLOC_008229	--	Novel_lncRNA	ENSMUST00000111915	ENSMUSG00000030207	Fam234b	-||Quinonprotein alcohol dehydrogenase-like superfamily	0.951777	7.73362e-05
LNC_000065	XLOC_008229	--	Novel_lncRNA	ENSMUST00000124226	ENSMUSG00000049804	Armcx4	Armadillo||Armadillo-type fold||Armadillo repeat-containing domain	0.960486	3.88476e-05
LNC_000065	XLOC_008229	--	Novel_lncRNA	ENSMUST00000022462	ENSMUSG00000021906	Oxnad1	Oxidoreductase FAD/NAD(P)-binding||Ferredoxin reductase-type FAD-binding domain||Riboflavin synthase-like beta-barrel||-||Phenol hydroxylase reductase	-0.956709	5.3275e-05
LNC_000065	XLOC_008229	--	Novel_lncRNA	ENSMUST00000022429	ENSMUSG00000021877	Arf4	Small GTPase superfamily, SAR1-type||P-loop containing nucleoside triphosphate hydrolase||Small GTPase superfamily, ARF/SAR type||Small GTP-binding protein domain||Small GTPase superfamily, Rab type||Small GTPase superfamily, ARF type	-0.959927	4.07841e-05
LNC_000065	XLOC_008229	--	Novel_lncRNA	ENSMUST00000169504	ENSMUSG00000022019	Tdrd3	Tudor domain||Ubiquitin-associated domain||Survival motor neuron||RecQ mediated genome instability protein, N-terminal||UBA-like	0.968239	1.82256e-05
LNC_000065	XLOC_008229	--	Novel_lncRNA	ENSMUST00000090398	ENSMUSG00000021782	Dlg5	Domain of unknown function DUF622||Guanylate kinase-like domain||Guanylate kinase/L-type calcium channel beta subunit||CARD domain||P-loop containing nucleoside triphosphate hydrolase||Death-like domain||PDZ domain||SH3 domain	0.950696	8.34877e-05
LNC_000065	XLOC_008229	--	Novel_lncRNA	ENSMUST00000130422	ENSMUSG00000037012	Hk1	Hexokinase, binding site||Hexokinase, N-terminal||-||Hexokinase, C-terminal	0.953888	6.62618e-05
LNC_000065	XLOC_008229	--	Novel_lncRNA	ENSMUST00000148891	ENSMUSG00000054728	Phactr1	RPEL repeat	0.972414	1.11752e-05
LNC_000065	XLOC_008229	--	Novel_lncRNA	ENSMUST00000038739	ENSMUSG00000033596	Rfwd3	Zinc finger, RING-type||WD40 repeat||WD40-repeat-containing domain	-0.955101	6.04281e-05
LNC_000065	XLOC_008229	--	Novel_lncRNA	ENSMUST00000136405	ENSMUSG00000033149	Phldb2	Pleckstrin homology domain||-	0.957195	5.12347e-05
LNC_000065	XLOC_008229	--	Novel_lncRNA	ENSMUST00000107337	ENSMUSG00000008305	Tle1	-||WD40 repeat||Groucho/transducin-like enhancer||Groucho/TLE, N-terminal Q-rich domain||WD40 repeat, conserved site||WD40-repeat-containing domain	0.967616	1.94953e-05
LNC_000065	XLOC_008229	--	Novel_lncRNA	ENSMUST00000057261	ENSMUSG00000053040	Aph1c	Gamma-secretase subunit Aph-1	-0.957391	5.04253e-05
LNC_000065	XLOC_008229	--	Novel_lncRNA	ENSMUST00000091672	ENSMUSG00000069255	Dusp22	Protein-tyrosine phosphatase-like||Protein-tyrosine phosphatase, catalytic||Dual specificity protein phosphatase domain||Tyrosine specific protein phosphatases domain||Dual specificity phosphatase, catalytic domain||Atypical dual specificity phosphatase	-0.983685	1.79772e-06
LNC_000065	XLOC_008229	--	Novel_lncRNA	ENSMUST00000030724	ENSMUSG00000028893	Sesn2	Sestrin||AhpD-like	0.971841	1.20023e-05
LNC_000065	XLOC_008229	--	Novel_lncRNA	ENSMUST00000030882	ENSMUSG00000029017	Pmpcb	Metalloenzyme, LuxS/M16 peptidase-like||Peptidase M16, C-terminal||Peptidase M16, zinc-binding site||Peptidase M16, N-terminal||-	-0.952301	7.4472e-05
LNC_000065	XLOC_008229	--	Novel_lncRNA	ENSMUST00000026274	ENSMUSG00000025245	Lztfl1	-	-0.965226	2.49559e-05
LNC_000065	XLOC_008229	--	Novel_lncRNA	ENSMUST00000182097	ENSMUSG00000025027	Xpnpep1	Creatinase/Aminopeptidase P, N-terminal||-||Creatinase, N-terminal||Peptidase M24B, X-Pro dipeptidase/aminopeptidase P, conserved site||Peptidase M24, structural domain	-0.956951	5.22499e-05
LNC_000065	XLOC_008229	--	Novel_lncRNA	ENSMUST00000034141	ENSMUSG00000047866	Lonp2	Lon protease, bacterial/eukaryotic-type||Ribosomal protein S5 domain 2-type fold||Peptidase S16, Lon C-terminal||ATPase, AAA-type, core||ATP-dependent protease La (LON), substrate-binding domain||Peptidase S16, active site||PUA-like domain||P-loop containing nucleoside triphosphate hydrolase||AAA+ ATPase domain	-0.956364	5.47548e-05
LNC_000065	XLOC_008229	--	Novel_lncRNA	ENSMUST00000117798	ENSMUSG00000034949	Zfr2	Zinc finger, U1-type||Zinc finger, C2H2||-||2-5-oligoadenylate synthetase, N-terminal||DZF domain||Zinc finger, C2H2-like	0.955215	5.99025e-05
LNC_000065	XLOC_008229	--	Novel_lncRNA	ENSMUST00000022904	ENSMUSG00000022295	Atp6v1c1	ATPase, V1 complex, subunit C	-0.962922	3.11662e-05
LNC_000065	XLOC_008229	--	Novel_lncRNA	ENSMUST00000004622	ENSMUSG00000004508	Gab2	Pleckstrin homology domain	0.958789	4.49323e-05
LNC_000065	XLOC_008229	--	Novel_lncRNA	ENSMUST00000140770	ENSMUSG00000066438	Plekhd1	Pleckstrin homology domain||-	0.955977	5.64533e-05
LNC_000065	XLOC_008229	--	Novel_lncRNA	ENSMUST00000096766	ENSMUSG00000032624	Eml4	WD40-repeat-containing domain||WD40 repeat, conserved site||Quinonprotein alcohol dehydrogenase-like superfamily||HELP||WD40 repeat	0.957466	5.01218e-05
LNC_000065	XLOC_008229	--	Novel_lncRNA	ENSMUST00000041475	ENSMUSG00000048612	Myof	FerIin domain||Ferlin A-domain||Ferlin B-domain||C2 domain||Peroxin/Ferlin domain	0.964921	2.57204e-05
LNC_000065	XLOC_008229	--	Novel_lncRNA	ENSMUST00000016401	ENSMUSG00000016257	Slmo2	PRELI/MSF1 domain	-0.955211	5.99216e-05
LNC_000065	XLOC_008229	--	Novel_lncRNA	ENSMUST00000035495	ENSMUSG00000032815	Fanca	-||Fanconi anaemia group A protein	0.965187	2.50517e-05
LNC_000106	XLOC_010528	--	Novel_lncRNA	ENSMUST00000001253	ENSMUSG00000020651	Slc26a4	Sulphate anion transporter, conserved site||STAS domain||SLC26A/SulP transporter domain||SLC26A/SulP transporter	0.978441	4.74377e-06
LNC_000106	XLOC_010528	--	Novel_lncRNA	ENSMUST00000206911	ENSMUSG00000006269	Atp6v1b1	ATPase, F1/V1/A1 complex, alpha/beta subunit, nucleotide-binding domain||ATPase, F1 complex alpha/beta subunit, N-terminal domain||P-loop containing nucleoside triphosphate hydrolase||-||ATPase, alpha/beta subunit, nucleotide-binding domain, active site||ATPase, F1/V1/A1 complex, alpha/beta subunit, C-terminal||ATPase, V1 complex, subunit B	0.98266	2.22269e-06
LNC_000106	XLOC_010528	--	Novel_lncRNA	ENSMUST00000002048	ENSMUSG00000001983	Taco1	YebC-like||Transcriptional regulator TACO1-like	-0.961725	3.47907e-05
LNC_000106	XLOC_010528	--	Novel_lncRNA	ENSMUST00000048993	ENSMUSG00000035834	Polr3g	DNA-directed RNA polymerase III, subunit Rpc31	-0.953208	6.96957e-05
LNC_000106	XLOC_010528	--	Novel_lncRNA	ENSMUST00000030771	ENSMUSG00000029014	Dnajc2	DnaJ domain, conserved site||DnaJ domain||Myb domain||Homeodomain-like||SANT/Myb domain||SANT domain	-0.977748	5.29555e-06
LNC_000106	XLOC_010528	--	Novel_lncRNA	ENSMUST00000031793	ENSMUSG00000029780	Nt5c3	Pyrimidine 5'-nucleotidase, eukaryotic||HAD-like domain||HAD-superfamily hydrolase, subfamily IB, PSPase-like||-	-0.950451	8.4929e-05
LNC_000106	XLOC_010528	--	Novel_lncRNA	ENSMUST00000167199	ENSMUSG00000024683	Mrpl16	Ribosomal protein L16||Ribosomal protein L10e/L16	-0.960909	3.74273e-05
LNC_000106	XLOC_010528	--	Novel_lncRNA	ENSMUST00000097442	ENSMUSG00000026604	Ptpn14	Protein-tyrosine phosphatase-like||FERM, C-terminal PH-like domain||FERM domain||Ubiquitin-related domain||FERM conserved site||FERM central domain||Protein-tyrosine phosphatase, non-receptor type-14, -21||Protein-tyrosine phosphatase, catalytic||PTP type protein phosphatase||Band 4.1 domain||FERM, N-terminal||Tyrosine specific protein phosphatases domain||Protein-tyrosine phosphatase, active site	0.95386	6.63976e-05
LNC_000106	XLOC_010528	--	Novel_lncRNA	ENSMUST00000114294	ENSMUSG00000029802	Abcg2	ABC-2 type transporter||ABC transporter-like||-||P-loop containing nucleoside triphosphate hydrolase||AAA+ ATPase domain	-0.951121	8.10306e-05
LNC_000106	XLOC_010528	--	Novel_lncRNA	ENSMUST00000029630	ENSMUSG00000028001	Fga	Fibrinogen, alpha/beta/gamma chain, C-terminal globular domain||Fibrinogen, conserved site||Fibrinogen, alpha/beta/gamma chain, coiled coil domain||Fibrinogen alpha C domain	0.963571	2.93156e-05
LNC_000106	XLOC_010528	--	Novel_lncRNA	ENSMUST00000056153	ENSMUSG00000044788	Fads6	Fatty acid desaturase domain	0.969425	1.5972e-05
LNC_000106	XLOC_010528	--	Novel_lncRNA	ENSMUST00000122063	ENSMUSG00000040040	Ift88	-||Tetratricopeptide repeat-containing domain||Tetratricopeptide repeat||Tetratricopeptide repeat 1	-0.961312	3.61079e-05
LNC_000106	XLOC_010528	--	Novel_lncRNA	ENSMUST00000035870	ENSMUSG00000033963	Fancd2os	FANCD2 opposite strand protein	-0.954361	6.39428e-05
LNC_000106	XLOC_010528	--	Novel_lncRNA	ENSMUST00000124226	ENSMUSG00000049804	Armcx4	Armadillo||Armadillo-type fold||Armadillo repeat-containing domain	0.961431	3.5726e-05
LNC_000106	XLOC_010528	--	Novel_lncRNA	ENSMUST00000028852	ENSMUSG00000027374	Mrps5	-||Ribosomal protein S5, C-terminal||Ribosomal protein S5, N-terminal, conserved site||Ribosomal protein S5, N-terminal||Ribosomal protein S5 domain 2-type fold	-0.952178	7.514e-05
LNC_000106	XLOC_010528	--	Novel_lncRNA	ENSMUST00000066583	ENSMUSG00000053861	Gm9925	-	0.950709	8.34087e-05
LNC_000106	XLOC_010528	--	Novel_lncRNA	ENSMUST00000163588	ENSMUSG00000033855	Ston1	-||Mu homology domain||Stonin||Stonin homology	0.950656	8.37203e-05
LNC_000106	XLOC_010528	--	Novel_lncRNA	ENSMUST00000119336	ENSMUSG00000054708	Ankrd24	-||Ankyrin repeat-containing domain||Ankyrin repeat	0.952201	7.50146e-05
LNC_000106	XLOC_010528	--	Novel_lncRNA	ENSMUST00000030769	ENSMUSG00000028932	Psmc2	ATPase, AAA-type, conserved site||P-loop containing nucleoside triphosphate hydrolase||AAA+ ATPase domain||26S proteasome subunit P45||ATPase, AAA-type, core	-0.970707	1.37652e-05
LNC_000106	XLOC_010528	--	Novel_lncRNA	ENSMUST00000036606	ENSMUSG00000031216	Stard8	START domain||Rho GTPase activation protein||Rho GTPase-activating protein domain||-	0.961301	3.61443e-05
LNC_000106	XLOC_010528	--	Novel_lncRNA	ENSMUST00000131003	ENSMUSG00000033149	Phldb2	Pleckstrin homology domain||-	-0.964737	2.61931e-05
LNC_000106	XLOC_010528	--	Novel_lncRNA	ENSMUST00000142585	ENSMUSG00000028675	Pnrc2	-	-0.959447	4.24995e-05
LNC_000106	XLOC_010528	--	Novel_lncRNA	ENSMUST00000106983	ENSMUSG00000001827	Folr1	-||Folate receptor-like	-0.959339	4.28921e-05
LNC_000106	XLOC_010528	--	Novel_lncRNA	ENSMUST00000110857	ENSMUSG00000020664	Dld	Dihydrolipoamide dehydrogenase||Pyridine nucleotide-disulphide oxidoreductase, class I, active site||FAD/NAD-linked reductase, dimerisation domain||Pyridine nucleotide-disulphide oxidoreductase, FAD/NAD(P)-binding domain||Pyridine nucleotide-disulphide oxidoreductase, dimerisation domain	-0.971506	1.25045e-05
LNC_000106	XLOC_010528	--	Novel_lncRNA	ENSMUST00000140770	ENSMUSG00000066438	Plekhd1	Pleckstrin homology domain||-	0.964911	2.57458e-05
LNC_000106	XLOC_010528	--	Novel_lncRNA	ENSMUST00000198931	ENSMUSG00000031292	Cdkl5	Serine/threonine-protein kinase, active site||Protein kinase domain||Protein kinase, ATP binding site||Protein kinase-like domain||Serine/threonine/dual specificity protein kinase, catalytic domain	0.960293	3.95076e-05
LNC_000106	XLOC_010528	--	Novel_lncRNA	ENSMUST00000030455	ENSMUSG00000028692	Akr1a1	Aldo/keto reductase, conserved site||Aldo/keto reductase subgroup||NADP-dependent oxidoreductase domain	-0.963181	3.04198e-05
LNC_000106	XLOC_010528	--	Novel_lncRNA	ENSMUST00000032429	ENSMUSG00000030291	Med21	Mediator complex, subunit Med21	-0.953692	6.72405e-05
LNC_000106	XLOC_010528	--	Novel_lncRNA	ENSMUST00000026552	ENSMUSG00000025479	Cyp2e1	Cytochrome P450, conserved site||Cytochrome P450||Cytochrome P450, E-class, group I, CYP2E-like||Cytochrome P450, E-class, group I	-0.955843	5.70466e-05
LNC_000106	XLOC_010528	--	Novel_lncRNA	ENSMUST00000040576	ENSMUSG00000034981	Parm1	-	0.965082	2.53145e-05
LNC_000106	XLOC_010528	--	Novel_lncRNA	ENSMUST00000028841	ENSMUSG00000027363	Usp8	Ubiquitin specific protease, conserved site||Ubiquitin specific protease domain||USP8 dimerisation domain||Peptidase C19, ubiquitin carboxyl-terminal hydrolase||Rhodanese-like domain	-0.954436	6.35794e-05
LNC_000106	XLOC_010528	--	Novel_lncRNA	ENSMUST00000145634	ENSMUSG00000025421	Hdhd2	Yos1-like||HAD-like domain||HAD-superfamily hydrolase, subfamily IIA, hypothetical 2||HAD-superfamily hydrolase, subfamily IIA	-0.951526	7.87364e-05
LNC_000106	XLOC_010528	--	Novel_lncRNA	ENSMUST00000034524	ENSMUSG00000032026	Rexo2	Ribonuclease H-like domain||Exonuclease, RNase T/DNA polymerase III	-0.960736	3.80041e-05
LNC_000106	XLOC_010528	--	Novel_lncRNA	ENSMUST00000081747	ENSMUSG00000060512	0610040J01Rik	-	0.956802	5.28786e-05
LNC_000106	XLOC_010528	--	Novel_lncRNA	ENSMUST00000110164	ENSMUSG00000027341	Tmem230	Protein of unknown function DUF872, transmembrane	0.965697	2.38036e-05
LNC_000106	XLOC_010528	--	Novel_lncRNA	ENSMUST00000063814	ENSMUSG00000052102	Gnpda1	Glucosamine/galactosamine-6-phosphate isomerase||Glucosamine-6-phosphate isomerase||Glucosamine-6-phosphate isomerase, conserved site	-0.958065	4.77225e-05
LNC_000106	XLOC_010528	--	Novel_lncRNA	ENSMUST00000020885	ENSMUSG00000020570	Sypl	Synaptophysin/synaptoporin||Marvel domain	-0.962105	3.36105e-05
LNC_000106	XLOC_010528	--	Novel_lncRNA	ENSMUST00000044286	ENSMUSG00000039199	Zdhhc1	Zinc finger, DHHC-type, palmitoyltransferase	0.963473	2.95905e-05
LNC_000106	XLOC_010528	--	Novel_lncRNA	ENSMUST00000047749	ENSMUSG00000036934	4921524J17Rik	Uncharacterised domain UPF0547	-0.973564	9.63784e-06
LNC_000106	XLOC_010528	--	Novel_lncRNA	ENSMUST00000111915	ENSMUSG00000030207	Fam234b	-||Quinonprotein alcohol dehydrogenase-like superfamily	0.975061	7.87093e-06
LNC_000106	XLOC_010528	--	Novel_lncRNA	ENSMUST00000026274	ENSMUSG00000025245	Lztfl1	-	-0.958906	4.4493e-05
LNC_000106	XLOC_010528	--	Novel_lncRNA	ENSMUST00000062213	ENSMUSG00000025212	Sfxn3	Tricarboxylate/iron carrier	0.958631	4.55297e-05
LNC_000106	XLOC_010528	--	Novel_lncRNA	ENSMUST00000058997	ENSMUSG00000044646	Zbtb7c	Zinc finger, C2H2-like||POZ domain||BTB/POZ domain||Zinc finger, C2H2||Armadillo-type fold	0.979876	3.73283e-06
LNC_000106	XLOC_010528	--	Novel_lncRNA	ENSMUST00000069430	ENSMUSG00000021000	Ctage5	-	-0.965048	2.54011e-05
LNC_000106	XLOC_010528	--	Novel_lncRNA	ENSMUST00000091672	ENSMUSG00000069255	Dusp22	Protein-tyrosine phosphatase-like||Protein-tyrosine phosphatase, catalytic||Dual specificity protein phosphatase domain||Tyrosine specific protein phosphatases domain||Dual specificity phosphatase, catalytic domain||Atypical dual specificity phosphatase	-0.957269	5.09259e-05
LNC_000106	XLOC_010528	--	Novel_lncRNA	ENSMUST00000044730	ENSMUSG00000038437	Mllt6	Zinc finger, PHD-type, conserved site||Zinc finger, PHD-type||Zinc finger, FYVE/PHD-type||Zinc finger, PHD-finger	0.966205	2.26025e-05
LNC_000106	XLOC_010528	--	Novel_lncRNA	ENSMUST00000028595	ENSMUSG00000027173	Depdc7	DEP domain	-0.960282	3.95451e-05
LNC_000106	XLOC_010528	--	Novel_lncRNA	ENSMUST00000114004	ENSMUSG00000015488	Cacfd1	TVP18/Calcium channel flower	0.957406	5.03662e-05
LNC_000106	XLOC_010528	--	Novel_lncRNA	ENSMUST00000019749	ENSMUSG00000027102	Hoxd8	Homeobox, conserved site||Homeodomain, metazoa||Homeobox domain||Homeodomain-like||Homeobox protein, antennapedia type, conserved site	0.952499	7.34096e-05
LNC_000106	XLOC_010528	--	Novel_lncRNA	ENSMUST00000022904	ENSMUSG00000022295	Atp6v1c1	ATPase, V1 complex, subunit C	-0.956441	5.44209e-05
LNC_000106	XLOC_010528	--	Novel_lncRNA	ENSMUST00000076034	ENSMUSG00000059479	B3gnt8	Glycosyl transferase, family 31||-	0.962565	3.22166e-05
LNC_000106	XLOC_010528	--	Novel_lncRNA	ENSMUST00000081232	ENSMUSG00000034330	Plcg2	Phospholipase C, phosphatidylinositol-specific, Y domain||SH2 domain||Phosphatidylinositol-specific phospholipase C, X domain||Phosphatidylinositol-4, 5-bisphosphate phosphodiesterase gamma||Pleckstrin homology domain||C2 domain||Phosphoinositide-specific phospholipase C, EF-hand-like domain||SH3 domain||PLC-like phosphodiesterase, TIM beta/alpha-barrel domain||Phosphoinositide phospholipase C fa…	0.962022	3.38652e-05
LNC_000106	XLOC_010528	--	Novel_lncRNA	ENSMUST00000119612	ENSMUSG00000025903	Lypla1	Alpha/Beta hydrolase fold||Phospholipase/carboxylesterase/thioesterase	-0.956562	5.3902e-05
LNC_000106	XLOC_010528	--	Novel_lncRNA	ENSMUST00000147875	ENSMUSG00000072640	Lyrm9	Complex 1 LYR protein	0.955812	5.71852e-05
LNC_000106	XLOC_010528	--	Novel_lncRNA	ENSMUST00000030986	ENSMUSG00000029103	Lrpap1	Alpha-2-macroglobulin RAP, C-terminal||Alpha-2-macroglobulin receptor-associated protein, domain 1	-0.95033	8.56429e-05
LNC_000106	XLOC_010528	--	Novel_lncRNA	ENSMUST00000029900	ENSMUSG00000028238	Atp6v0d2	ATPase, V0 complex, subunit d||ATPase, V0 complex, c/d subunit||-	0.95347	6.83584e-05
LNC_000106	XLOC_010528	--	Novel_lncRNA	ENSMUST00000124341	ENSMUSG00000006576	Slc4a3	Bicarbonate transporter, eukaryotic||Anion exchange protein||-||Anion exchange, conserved site||Bicarbonate transporter, C-terminal||Band 3 cytoplasmic domain||Anion exchange protein 3||Phosphotransferase/anion transporter	0.975911	6.97749e-06
LNC_000106	XLOC_010528	--	Novel_lncRNA	ENSMUST00000023504	ENSMUSG00000022809	Nr1i2	Nuclear hormone receptor||Zinc finger, nuclear hormone receptor-type||Nuclear hormone receptor, ligand-binding domain	0.955057	6.06364e-05
LNC_000106	XLOC_010528	--	Novel_lncRNA	ENSMUST00000053251	ENSMUSG00000031586	Rbpms	RNA recognition motif domain||-	0.962851	3.13743e-05
LNC_000106	XLOC_010528	--	Novel_lncRNA	ENSMUST00000115694	ENSMUSG00000024485	Slc4a9	Bicarbonate transporter, eukaryotic||Bicarbonate transporter, C-terminal||Band 3 cytoplasmic domain||Sodium bicarbonate cotransporter||Phosphotransferase/anion transporter	0.962792	3.15449e-05
LNC_000106	XLOC_010528	--	Novel_lncRNA	ENSMUST00000081654	ENSMUSG00000001435	Col18a1	Concanavalin A-like lectin/glucanase domain||Frizzled domain||Domain of unknown function DUF959, collagen XVIII, N-terminal||Collagenase NC10/endostatin||-||Collagen triple helix repeat||Laminin G domain||C-type lectin fold	0.964483	2.68511e-05
LNC_000106	XLOC_010528	--	Novel_lncRNA	ENSMUST00000066330	ENSMUSG00000005417	Mprip	Pleckstrin homology domain||-	0.953149	7.0001e-05
LNC_000106	XLOC_010528	--	Novel_lncRNA	ENSMUST00000149579	ENSMUSG00000039219	Arid4b	RNA binding activity-knot of a chromodomain||RBB1NT||Tudor domain||Chromo domain-like||ARID DNA-binding domain	0.984208	1.60459e-06
LNC_000106	XLOC_010528	--	Novel_lncRNA	ENSMUST00000028190	ENSMUSG00000026842	Abl1	F-actin binding||SH2 domain||Protein kinase, ATP binding site||-||Protein kinase-like domain||Protein kinase domain||SH3 domain||Tyrosine-protein kinase, active site||Tyrosine-protein kinase, catalytic domain||Serine-threonine/tyrosine-protein kinase catalytic domain	0.970018	1.49226e-05
LNC_000106	XLOC_010528	--	Novel_lncRNA	ENSMUST00000111045	ENSMUSG00000048482	Bdnf	Nerve growth factor-like||Nerve growth factor conserved site||Cystine-knot cytokine||Brain-derived neurotrophic factor||Nerve growth factor-related	-0.952041	7.58864e-05
LNC_000106	XLOC_010528	--	Novel_lncRNA	ENSMUST00000161401	ENSMUSG00000063694	Cycs	Cytochrome c-like domain||Cytochrome c, class IA/ IB	-0.957825	4.86738e-05
LNC_000106	XLOC_010528	--	Novel_lncRNA	ENSMUST00000178003	ENSMUSG00000020744	Slc25a19	Mitochondrial substrate/solute carrier||-||Mitochondrial carrier protein	-0.956124	5.58025e-05
LNC_000106	XLOC_010528	--	Novel_lncRNA	ENSMUST00000174143	ENSMUSG00000079495	Gm11128	GNAT domain||Acyl-CoA N-acyltransferase	-0.980128	3.57273e-06
LNC_000106	XLOC_010528	--	Novel_lncRNA	ENSMUST00000059997	ENSMUSG00000045838	A430105I19Rik	Protein of unknown function DUF4594	0.95125	8.02963e-05
LNC_000106	XLOC_010528	--	Novel_lncRNA	ENSMUST00000077196	ENSMUSG00000037185	Krt80	Keratin, type II||Intermediate filament protein	0.972964	1.04193e-05
LNC_000106	XLOC_010528	--	Novel_lncRNA	ENSMUST00000034866	ENSMUSG00000032314	Etfa	Electron transfer flavoprotein, alpha subunit, C-terminal, conserved site||Electron transfer flavoprotein, alpha subunit||Electron transfer flavoprotein, alpha subunit, C-terminal||DHS-like NAD/FAD-binding domain||Electron transfer flavoprotein, alpha/beta-subunit, N-terminal	-0.963844	2.85643e-05
LNC_000106	XLOC_010528	--	Novel_lncRNA	ENSMUST00000000594	ENSMUSG00000000581	C1d	Sas10/Utp3/C1D	-0.95577	5.73766e-05
LNC_000106	XLOC_010528	--	Novel_lncRNA	ENSMUST00000097672	ENSMUSG00000073633	Fbxo36	F-box domain	-0.957046	5.18509e-05
LNC_000106	XLOC_010528	--	Novel_lncRNA	ENSMUST00000108243	ENSMUSG00000027665	Pik3ca	Armadillo-type fold||C2 domain||Phosphoinositide 3-kinase, accessory (PIK) domain||Phosphatidylinositol 3-/4-kinase, catalytic domain||Phosphatidylinositol 3/4-kinase, conserved site||Phosphatidylinositol 3-kinase Ras-binding (PI3K RBD) domain||Phosphatidylinositol 3-kinase, C2 domain||Protein kinase-like domain||Ubiquitin-related domain||Phosphatidylinositol 3-kinase adaptor-binding (PI3K ABD) d…	-0.968326	1.80523e-05
LNC_000106	XLOC_010528	--	Novel_lncRNA	ENSMUST00000112047	ENSMUSG00000025193	Cutc	Copper homeostasis protein CutC	-0.962642	3.19903e-05
LNC_000106	XLOC_010528	--	Novel_lncRNA	ENSMUST00000088086	ENSMUSG00000006800	Sulf2	Sulfatase, conserved site||Sulfatase||Alkaline-phosphatase-like, core domain||Extracellular sulfatase, C-terminal||Extracellular sulfatase	0.951498	7.88952e-05
LNC_000106	XLOC_010528	--	Novel_lncRNA	ENSMUST00000172868	ENSMUSG00000015120	Ube2i	Ubiquitin-conjugating enzyme, active site||Ubiquitin-conjugating enzyme E2||-||Ubiquitin-conjugating enzyme/RWD-like	0.957678	4.92635e-05
LNC_000106	XLOC_010528	--	Novel_lncRNA	ENSMUST00000072576	ENSMUSG00000014504	Srp19	Signal recognition particle, SRP19 subunit	-0.950725	8.33204e-05
LNC_000106	XLOC_010528	--	Novel_lncRNA	ENSMUST00000034141	ENSMUSG00000047866	Lonp2	Lon protease, bacterial/eukaryotic-type||Ribosomal protein S5 domain 2-type fold||Peptidase S16, Lon C-terminal||ATPase, AAA-type, core||ATP-dependent protease La (LON), substrate-binding domain||Peptidase S16, active site||PUA-like domain||P-loop containing nucleoside triphosphate hydrolase||AAA+ ATPase domain	-0.951732	7.75856e-05
LNC_000106	XLOC_010528	--	Novel_lncRNA	ENSMUST00000124830	ENSMUSG00000054889	Dsp	Plectin repeat||Spectrin/alpha-actinin	0.966351	2.22654e-05
LNC_000106	XLOC_010528	--	Novel_lncRNA	ENSMUST00000160534	ENSMUSG00000089694	Gm4477	GNAT domain||Acyl-CoA N-acyltransferase	-0.958462	4.61775e-05
LNC_000106	XLOC_010528	--	Novel_lncRNA	ENSMUST00000021119	ENSMUSG00000020774	Aspa	Aspartoacylase||Succinylglutamate desuccinylase/aspartoacylase	-0.960931	3.73545e-05
LNC_000106	XLOC_010528	--	Novel_lncRNA	ENSMUST00000000329	ENSMUSG00000000320	Alox12	Lipoxygenase, conserved site||PLAT/LH2 domain||Lipoxygenase, iron binding site||Lipoxygenase, C-terminal||Lipoxygenase, mammalian	0.954733	6.21569e-05
LNC_000106	XLOC_010528	--	Novel_lncRNA	ENSMUST00000134710	ENSMUSG00000039578	Ccser1	-	-0.96497	2.55979e-05
LNC_000106	XLOC_010528	--	Novel_lncRNA	ENSMUST00000162431	ENSMUSG00000025727	A930017K11Rik	-	0.978207	4.92519e-06
LNC_000106	XLOC_010528	--	Novel_lncRNA	ENSMUST00000117583	ENSMUSG00000029993	Nfu1	NIF system FeS cluster assembly, NifU, C-terminal||Scaffold protein Nfu/NifU, N-terminal	-0.951871	7.68153e-05
LNC_000106	XLOC_010528	--	Novel_lncRNA	ENSMUST00000029419	ENSMUSG00000027831	Veph1	Pleckstrin homology domain||Armadillo-type fold	-0.953572	6.78395e-05
LNC_000106	XLOC_010528	--	Novel_lncRNA	ENSMUST00000057115	ENSMUSG00000044792	Isca1	FeS cluster insertion protein||FeS cluster insertion, C-terminal, conserved site||FeS cluster biogenesis	-0.966038	2.29929e-05
LNC_000106	XLOC_010528	--	Novel_lncRNA	ENSMUST00000108007	ENSMUSG00000095193	Gm20939	Zinc finger, C2H2-like||Krueppel-associated box||Zinc finger, C2H2	-0.952034	7.59223e-05
LNC_000106	XLOC_010528	--	Novel_lncRNA	ENSMUST00000017458	ENSMUSG00000017314	Mpp2	Guanylate kinase-like domain||Variant SH3 domain||Guanylate kinase/L-type calcium channel beta subunit||L27 domain, C-terminal||PDZ domain||P-loop containing nucleoside triphosphate hydrolase||Guanylate kinase, conserved site||SH3 domain||L27 domain	0.954573	6.29212e-05
LNC_000106	XLOC_010528	--	Novel_lncRNA	ENSMUST00000016631	ENSMUSG00000016487	Ppfibp1	Sterile alpha motif domain||-||Sterile alpha motif/pointed domain	-0.957627	4.94666e-05
LNC_000106	XLOC_010528	--	Novel_lncRNA	ENSMUST00000174216	ENSMUSG00000015120	Ube2i	Ubiquitin-conjugating enzyme, active site||Ubiquitin-conjugating enzyme E2||-||Ubiquitin-conjugating enzyme/RWD-like	0.97302	1.03455e-05
LNC_000106	XLOC_010528	--	Novel_lncRNA	ENSMUST00000117506	ENSMUSG00000059890	Ube4a	U box domain||-||Ubiquitin conjugation factor E4, core	-0.965288	2.48018e-05
LNC_000106	XLOC_010528	--	Novel_lncRNA	ENSMUST00000047620	ENSMUSG00000034871	Fam151a	Protein of unknown function DUF2181	-0.95026	8.60639e-05
LNC_000106	XLOC_010528	--	Novel_lncRNA	ENSMUST00000072961	ENSMUSG00000041236	Vps41	WD40-repeat-containing domain||Vacuolar protein sorting-associated protein 41||Clathrin, heavy chain/VPS, 7-fold repeat||Zinc finger, RING-type	-0.955586	5.82022e-05
LNC_000106	XLOC_010528	--	Novel_lncRNA	ENSMUST00000115516	ENSMUSG00000062012	Zfp13	Zinc finger, C2H2-like||Krueppel-associated box||Zinc finger, C2H2	0.969139	1.64954e-05
LNC_000106	XLOC_010528	--	Novel_lncRNA	ENSMUST00000169504	ENSMUSG00000022019	Tdrd3	Tudor domain||Ubiquitin-associated domain||Survival motor neuron||RecQ mediated genome instability protein, N-terminal||UBA-like	0.961961	3.40528e-05
LNC_000106	XLOC_010528	--	Novel_lncRNA	ENSMUST00000034197	ENSMUSG00000031749	St3gal2	Glycosyl transferase, family 29||Sialyltransferase	0.958066	4.77184e-05
LNC_000106	XLOC_010528	--	Novel_lncRNA	ENSMUST00000096224	ENSMUSG00000022994	Adcy6	Adenylyl cyclase class-4/guanylyl cyclase, conserved site||Nucleotide cyclase||Adenylate cyclase, conserved domain||Adenylyl cyclase class-3/4/guanylyl cyclase	0.972034	1.17185e-05
LNC_000106	XLOC_010528	--	Novel_lncRNA	ENSMUST00000045557	ENSMUSG00000040010	Slc7a5	Amino acid/polyamine transporter I||L-type amino acid transporter	0.968596	1.75246e-05
LNC_000106	XLOC_010528	--	Novel_lncRNA	ENSMUST00000059588	ENSMUSG00000048371	Pdp2	PPM-type phosphatase domain||PPM-type phosphatase, divalent cation binding	-0.969603	1.56508e-05
LNC_000106	XLOC_010528	--	Novel_lncRNA	ENSMUST00000027837	ENSMUSG00000026556	Vangl2	Strabismus	0.957949	4.81787e-05
LNC_000106	XLOC_010528	--	Novel_lncRNA	ENSMUST00000171887	ENSMUSG00000104445	Rhbg	Ammonium transporter AmtB-like domain||Blood group Rhesus C/E/D polypeptide	0.950506	8.46026e-05
LNC_000267	XLOC_023063	--	Novel_lncRNA	ENSMUST00000108242	ENSMUSG00000027665	Pik3ca	Armadillo-type fold||C2 domain||Phosphoinositide 3-kinase, accessory (PIK) domain||Phosphatidylinositol 3-/4-kinase, catalytic domain||Phosphatidylinositol 3/4-kinase, conserved site||Phosphatidylinositol 3-kinase Ras-binding (PI3K RBD) domain||Phosphatidylinositol 3-kinase, C2 domain||Protein kinase-like domain||Ubiquitin-related domain||Phosphatidylinositol 3-kinase adaptor-binding (PI3K ABD) d…	0.952785	7.18957e-05
LNC_000267	XLOC_023063	--	Novel_lncRNA	ENSMUST00000128567	ENSMUSG00000029563	Foxp2	Fork head domain||-	0.956784	5.29558e-05
LNC_000267	XLOC_023063	--	Novel_lncRNA	ENSMUST00000161532	ENSMUSG00000022286	Grhl2	-||CP2 transcription factor	0.956514	5.41065e-05
LNC_000267	XLOC_023063	--	Novel_lncRNA	ENSMUST00000127550	ENSMUSG00000055762	Eef1d	Elongation factor 1 beta central acidic region, eukaryote||Translation elongation factor EF1B, beta/delta subunit, guanine nucleotide exchange||Translation elongation factor EF1B, beta/delta chains, conserved site||-	0.963126	3.0576e-05
LNC_000267	XLOC_023063	--	Novel_lncRNA	ENSMUST00000139940	ENSMUSG00000020653	Klf11	Zinc finger, C2H2-like||Zinc finger, C2H2||-	0.965974	2.31426e-05
LNC_000267	XLOC_023063	--	Novel_lncRNA	ENSMUST00000120411	ENSMUSG00000021750	Fam107a	Protein of unknown function DUF1151	0.958204	4.71786e-05
LNC_000267	XLOC_023063	--	Novel_lncRNA	ENSMUST00000159242	ENSMUSG00000055692	Tmem191c	Transmembrane protein 191B/C	0.9575	4.99841e-05
LNC_000267	XLOC_023063	--	Novel_lncRNA	ENSMUST00000089634	ENSMUSG00000027381	Bcl2l11	Bcl-x interacting, BH3 domain||Apoptosis, Bim N-terminal||Bcl-2-like protein 11	0.964679	2.63408e-05
LNC_000267	XLOC_023063	--	Novel_lncRNA	ENSMUST00000143625	ENSMUSG00000026811	St6galnac6	-||Glycosyl transferase, family 29	0.965055	2.53823e-05
LNC_000267	XLOC_023063	--	Novel_lncRNA	ENSMUST00000205933	ENSMUSG00000030669	Calca	Procalcitonin/adrenomedullin||Calcitonin peptide-like||Calcitonin||Calcitonin gene-related peptide||Calcitonin, conserved site	0.958405	4.6397e-05
LNC_000264	XLOC_022182	--	Novel_lncRNA	ENSMUST00000106051	ENSMUSG00000050390	C77080	-	0.97245	1.11248e-05
LNC_000264	XLOC_022182	--	Novel_lncRNA	ENSMUST00000077938	ENSMUSG00000061046	Haghl	Hydroxyacylglutathione hydrolase||Metallo-beta-lactamase	0.958741	4.51115e-05
LNC_000264	XLOC_022182	--	Novel_lncRNA	ENSMUST00000008684	ENSMUSG00000008540	Mgst1	Membrane-associated, eicosanoid/glutathione metabolism (MAPEG) protein||-	0.953407	6.86773e-05
LNC_000264	XLOC_022182	--	Novel_lncRNA	ENSMUST00000102512	ENSMUSG00000041193	Pla2g5	Phospholipase A2, active site||Phospholipase A2 domain||Phospholipase A2	0.95727	5.09222e-05
LNC_000264	XLOC_022182	--	Novel_lncRNA	ENSMUST00000115349	ENSMUSG00000060459	Kng2	HMW kininogen||Kininogen-type cystatin domain||Proteinase inhibitor I25, cystatin, conserved site||Cystatin domain	0.952472	7.3557e-05
LNC_000264	XLOC_022182	--	Novel_lncRNA	ENSMUST00000101225	ENSMUSG00000019969	Psen1	Peptidase A22A, presenilin||Peptidase A22A, presenilin 1||Presenilin/signal peptide peptidase	-0.954062	6.54024e-05
LNC_000264	XLOC_022182	--	Novel_lncRNA	ENSMUST00000002765	ENSMUSG00000002688	Prkd1	Serine/threonine-protein kinase, active site||Diacylglycerol/phorbol-ester binding||Protein kinase C mu-related||Protein kinase C-like, phorbol ester/diacylglycerol-binding domain||Protein kinase, ATP binding site||Protein kinase-like domain||Protein kinase domain||Pleckstrin homology domain||Serine/threonine/dual specificity protein kinase, catalytic domain	0.962524	3.2341e-05
LNC_000264	XLOC_022182	--	Novel_lncRNA	ENSMUST00000024988	ENSMUSG00000024164	C3	Netrin domain||Alpha-2-macroglobulin, conserved site||Alpha-2-macroglobulin, N-terminal 2||Alpha-macroglobulin complement component||Anaphylatoxin, complement system||Alpha-2-macroglobulin, N-terminal||Alpha-macroglobulin, receptor-binding||Anaphylatoxin/fibulin||Netrin module, non-TIMP type||Anaphylatoxin, complement system domain||Alpha-2-macroglobulin||Alpha-2-macroglobulin, thiol-ester bond-f…	0.962658	3.19401e-05
LNC_000264	XLOC_022182	--	Novel_lncRNA	ENSMUST00000132583	ENSMUSG00000031825	Crispld2	Allergen V5/Tpx-1-related, conserved site||Cysteine-rich secretory protein, allergen V5/Tpx-1-related||CAP domain||LCCL domain	0.972321	1.13062e-05
LNC_000264	XLOC_022182	--	Novel_lncRNA	ENSMUST00000190041	ENSMUSG00000033499	Larp4b	RNA-binding protein Lupus La||-	-0.96401	2.811e-05
LNC_000264	XLOC_022182	--	Novel_lncRNA	ENSMUST00000003319	ENSMUSG00000003234	Abcf3	P-loop containing nucleoside triphosphate hydrolase||ABC transporter-like||ABC transporter, conserved site||AAA+ ATPase domain	-0.957135	5.14833e-05
LNC_000264	XLOC_022182	--	Novel_lncRNA	ENSMUST00000033036	ENSMUSG00000030772	Dkk3	Dickkopf, N-terminal cysteine-rich	0.959122	4.36881e-05
LNC_000264	XLOC_022182	--	Novel_lncRNA	ENSMUST00000076316	ENSMUSG00000037148	Arhgap10	SH3 domain||Rho GTPase activation protein||Rho GTPase-activating protein domain||Pleckstrin homology domain	-0.963015	3.08953e-05
LNC_000264	XLOC_022182	--	Novel_lncRNA	ENSMUST00000059091	ENSMUSG00000056025	Clca3a1	Chloride channel calcium-activated||von Willebrand factor, type A||Calcium-activated chloride channel protein	0.958399	4.64206e-05
LNC_000264	XLOC_022182	--	Novel_lncRNA	ENSMUST00000050785	ENSMUSG00000026822	Lcn2	Lipocalin/cytosolic fatty-acid binding domain||Calycin-like||Lipocalin family conserved site||Lipocalin||Neutrophil gelatinase-associated lipocalin	0.978065	5.03782e-06
LNC_000264	XLOC_022182	--	Novel_lncRNA	ENSMUST00000178344	ENSMUSG00000095115	Itpripl2	Inositol 1,4,5-trisphosphate receptor-interacting protein family||Mab-21 domain	0.951569	7.84967e-05
LNC_000264	XLOC_022182	--	Novel_lncRNA	ENSMUST00000167574	ENSMUSG00000050541	Adra1b	G protein-coupled receptor, rhodopsin-like||GPCR, rhodopsin-like, 7TM||Alpha 1B adrenoceptor||Adrenoceptor family	0.952333	7.43006e-05
LNC_000264	XLOC_022182	--	Novel_lncRNA	ENSMUST00000004868	ENSMUSG00000004748	Mtfp1	Mitochondrial 18kDa protein	-0.959407	4.2645e-05
LNC_000264	XLOC_022182	--	Novel_lncRNA	ENSMUST00000046687	ENSMUSG00000038156	Spon1	Thrombospondin type-1 (TSP1) repeat||Spondin, N-terminal||Reeler domain	0.959689	4.16285e-05
LNC_000264	XLOC_022182	--	Novel_lncRNA	ENSMUST00000076352	ENSMUSG00000044734	Serpinb1a	Serpin, conserved site||Serpin domain	0.986741	8.72405e-07
LNC_000264	XLOC_022182	--	Novel_lncRNA	ENSMUST00000140523	ENSMUSG00000044712	Slc38a6	Amino acid transporter, transmembrane domain	-0.955659	5.78746e-05
LNC_000264	XLOC_022182	--	Novel_lncRNA	ENSMUST00000112707	ENSMUSG00000070639	Lrrc8b	LRRC8, pannexin-like TM region||Leucine-rich repeat||Leucine-rich repeat, typical subtype	-0.956088	5.59609e-05
LNC_000264	XLOC_022182	--	Novel_lncRNA	ENSMUST00000047334	ENSMUSG00000041248	Kcnj1	Potassium channel, inwardly rectifying, Kir||Immunoglobulin E-set||Potassium channel, inwardly rectifying, Kir1.1	0.967203	2.03706e-05
LNC_000264	XLOC_022182	--	Novel_lncRNA	ENSMUST00000019974	ENSMUSG00000019832	Rab32	Small GTP-binding protein domain||P-loop containing nucleoside triphosphate hydrolase||Small GTPase superfamily||Small GTPase superfamily, Rho type||Ran GTPase||Small GTPase superfamily, Rab type||Small GTPase superfamily, Ras type	-0.967489	1.97617e-05
LNC_000264	XLOC_022182	--	Novel_lncRNA	ENSMUST00000059099	ENSMUSG00000015668	Pdzd11	PDZ domain	-0.950455	8.49014e-05
LNC_000264	XLOC_022182	--	Novel_lncRNA	ENSMUST00000010451	ENSMUSG00000010307	Tmem86a	YhhN-like	-0.974981	7.95975e-06
LNC_000264	XLOC_022182	--	Novel_lncRNA	ENSMUST00000102852	ENSMUSG00000050737	Ptges	Membrane-associated, eicosanoid/glutathione metabolism (MAPEG) protein	0.960735	3.80053e-05
LNC_000264	XLOC_022182	--	Novel_lncRNA	ENSMUST00000038091	ENSMUSG00000038806	Sde2	Sde2 N-terminal domain	-0.970991	1.33077e-05
LNC_000264	XLOC_022182	--	Novel_lncRNA	ENSMUST00000077282	ENSMUSG00000054843	Atrnl1	Plexin repeat||C-type lectin||Plexin-like fold||EGF-like domain||CUB domain||C-type lectin fold||EGF-like, conserved site||Laminin EGF domain||EGF-like domain, extracellular	-0.964635	2.64544e-05
LNC_000264	XLOC_022182	--	Novel_lncRNA	ENSMUST00000022947	ENSMUSG00000022324	Matn2	EGF-like domain||Matrilin, coiled-coil trimerisation domain||EGF-type aspartate/asparagine hydroxylation site||Insulin-like growth factor binding protein, N-terminal||EGF-like calcium-binding domain||von Willebrand factor, type A||EGF-like, conserved site	0.964749	2.61614e-05
LNC_000264	XLOC_022182	--	Novel_lncRNA	ENSMUST00000201700	ENSMUSG00000058013	2019-09-11	Septin||P-loop containing nucleoside triphosphate hydrolase||Septin-type guanine nucleotide-binding (G) domain	0.994423	4.24314e-08
LNC_000264	XLOC_022182	--	Novel_lncRNA	ENSMUST00000091233	ENSMUSG00000036040	Adamtsl2	Thrombospondin type-1 (TSP1) repeat||PLAC||Peptidase M12B, ADAM-TS||ADAM-TS Spacer 1	0.972589	1.09305e-05
LNC_000264	XLOC_022182	--	Novel_lncRNA	ENSMUST00000027921	ENSMUSG00000026618	Iars2	Aminoacyl-tRNA synthetase, class I, conserved site||Aminoacyl-tRNA synthetase, class Ia||Valyl/Leucyl/Isoleucyl-tRNA synthetase, editing domain||Zinc finger, FPG/IleRS-type||Isoleucine-tRNA ligase||Methionyl/Valyl/Leucyl/Isoleucyl-tRNA synthetase, anticodon-binding||Aminoacyl-tRNA synthetase, class 1a, anticodon-binding	-0.954804	6.18209e-05
LNC_000264	XLOC_022182	--	Novel_lncRNA	ENSMUST00000139347	ENSMUSG00000068036	Mllt4	Forkhead-associated (FHA) domain||Ubiquitin-related domain||PDZ domain||SMAD/FHA domain||Dilute domain||-||Ras-associating (RA) domain	-0.951702	7.77518e-05
LNC_000264	XLOC_022182	--	Novel_lncRNA	ENSMUST00000041956	ENSMUSG00000020859	Spag9	-||WD40-repeat-containing domain||JNK/Rab-associated protein-1, N-terminal	-0.953842	6.64893e-05
LNC_000264	XLOC_022182	--	Novel_lncRNA	ENSMUST00000021390	ENSMUSG00000021003	Galc	Glycoside hydrolase, family 59||Glycoside hydrolase superfamily	-0.987663	6.78541e-07
LNC_000264	XLOC_022182	--	Novel_lncRNA	ENSMUST00000018744	ENSMUSG00000020534	Shmt1	Serine hydroxymethyltransferase||Serine hydroxymethyltransferase, pyridoxal phosphate binding site||Pyridoxal phosphate-dependent transferase	0.954852	6.15943e-05
LNC_000264	XLOC_022182	--	Novel_lncRNA	ENSMUST00000075162	ENSMUSG00000063903	Klk1	Serine proteases, trypsin domain||Peptidase S1, PA clan||Peptidase S1A, chymotrypsin-type||Peptidase S1, trypsin family, active site	0.955623	5.80369e-05
LNC_000264	XLOC_022182	--	Novel_lncRNA	ENSMUST00000165309	ENSMUSG00000040374	Pex2	Pex, N-terminal||Zinc finger, RING-type||Zinc finger, RING-type, conserved site||Zinc finger, C3HC4 RING-type	-0.961663	3.49857e-05
LNC_000264	XLOC_022182	--	Novel_lncRNA	ENSMUST00000056427	ENSMUSG00000058672	Tubb2a	Tubulin||Tubulin/FtsZ, C-terminal||Beta tubulin||Tubulin, conserved site||Tubulin/FtsZ, GTPase domain||Tubulin/FtsZ, 2-layer sandwich domain||Beta tubulin, autoregulation binding site	0.977772	5.27513e-06
LNC_000264	XLOC_022182	--	Novel_lncRNA	ENSMUST00000018571	ENSMUSG00000018427	Ypel2	Yippee/Mis18	0.952922	7.11803e-05
LNC_000264	XLOC_022182	--	Novel_lncRNA	ENSMUST00000092486	ENSMUSG00000059901	Adamts14	ADAM-TS Spacer 1||Peptidase M12B, ADAM-TS||PLAC||Thrombospondin type-1 (TSP1) repeat||Peptidase M12B, ADAM/reprolysin||Peptidase M12B, propeptide	0.958379	4.64962e-05
LNC_000269	XLOC_023130	--	Novel_lncRNA	ENSMUST00000060271	ENSMUSG00000047861	Foxi1	Fork head domain||Fork head domain conserved site1	0.961916	3.41936e-05
LNC_000269	XLOC_023130	--	Novel_lncRNA	ENSMUST00000014505	ENSMUSG00000014361	Mertk	Serine-threonine/tyrosine-protein kinase catalytic domain||Tyrosine-protein kinase, catalytic domain||Tyrosine-protein kinase, active site||Immunoglobulin-like domain||Protein kinase domain||Protein kinase-like domain||Fibronectin type III||Protein kinase, ATP binding site||Immunoglobulin subtype	0.951401	7.94403e-05
LNC_000269	XLOC_023130	--	Novel_lncRNA	ENSMUST00000095063	ENSMUSG00000038544	Inip	-	0.975065	7.86634e-06
LNC_000269	XLOC_023130	--	Novel_lncRNA	ENSMUST00000154032	ENSMUSG00000036966	Spryd3	SPRY domain||B30.2/SPRY domain||Concanavalin A-like lectin/glucanase domain	0.956088	5.59604e-05
LNC_000269	XLOC_023130	--	Novel_lncRNA	ENSMUST00000065917	ENSMUSG00000058799	Nap1l1	Nucleosome assembly protein (NAP)	-0.956348	5.48236e-05
LNC_000269	XLOC_023130	--	Novel_lncRNA	ENSMUST00000125123	ENSMUSG00000060317	Acnat2	BAAT/Acyl-CoA thioester hydrolase C-terminal||Acyl-CoA thioester hydrolase/bile acid-CoA amino acid N-acetyltransferase||Acyl-CoA thioesterase, long chain||Alpha/Beta hydrolase fold	0.9538	6.66997e-05
LNC_000269	XLOC_023130	--	Novel_lncRNA	ENSMUST00000108334	ENSMUSG00000028207	Asph	Aspartyl beta-hydroxylase/Triadin domain||Tetratricopeptide repeat||Aspartyl/asparaginy/proline hydroxylase||Tetratricopeptide repeat 2||Tetratricopeptide repeat-containing domain	0.975946	6.94217e-06
LNC_000269	XLOC_023130	--	Novel_lncRNA	ENSMUST00000167549	ENSMUSG00000037419	Endod1	Extracellular Endonuclease, subunit A	0.96685	2.11413e-05
LNC_000269	XLOC_023130	--	Novel_lncRNA	ENSMUST00000122222	ENSMUSG00000028977	Casz1	Zinc finger, C2H2||-||Zinc finger, C2H2-like	0.954424	6.36389e-05
LNC_000269	XLOC_023130	--	Novel_lncRNA	ENSMUST00000025826	ENSMUSG00000024891	Slc29a2	Major facilitator superfamily domain||Equilibrative nucleoside transporter	0.96071	3.80919e-05
LNC_000269	XLOC_023130	--	Novel_lncRNA	ENSMUST00000079413	ENSMUSG00000024222	Fkbp5	Tetratricopeptide repeat||FKBP-type peptidyl-prolyl cis-trans isomerase domain||Tetratricopeptide repeat-containing domain	0.96091	3.74246e-05
LNC_000269	XLOC_023130	--	Novel_lncRNA	ENSMUST00000069620	ENSMUSG00000055866	Per2	PAS fold-3||Period circadian-like, C-terminal||PAS domain	0.954872	6.15039e-05
LNC_000269	XLOC_023130	--	Novel_lncRNA	ENSMUST00000194134	ENSMUSG00000027820	Mme	Peptidase M13, C-terminal domain||Peptidase M13, N-terminal domain	-0.951277	8.01383e-05
LNC_000269	XLOC_023130	--	Novel_lncRNA	ENSMUST00000030677	ENSMUSG00000028862	Map3k6	Domain of unknown function DUF4071||Serine/threonine-protein kinase, active site||Protein kinase domain||Protein kinase-like domain||Serine/threonine/dual specificity protein kinase, catalytic domain||Sterile alpha motif/pointed domain||Protein kinase, ATP binding site	0.950715	8.33768e-05
LNC_000269	XLOC_023130	--	Novel_lncRNA	ENSMUST00000040820	ENSMUSG00000040147	Maob	Amine oxidase||Flavin amine oxidase||-	0.953353	6.89527e-05
LNC_000269	XLOC_023130	--	Novel_lncRNA	ENSMUST00000105502	ENSMUSG00000048756	Foxo3	-||Fork head domain	0.957339	5.06395e-05
LNC_000269	XLOC_023130	--	Novel_lncRNA	ENSMUST00000115582	ENSMUSG00000036585	Fgf1	Fibroblast growth factor family||IL-1 family/FGF family||Cytokine, IL-1-like	-0.956639	5.35733e-05
LNC_000269	XLOC_023130	--	Novel_lncRNA	ENSMUST00000036493	ENSMUSG00000033161	Atp1a1	P-type ATPase, cytoplasmic domain N||P-type ATPase, phosphorylation site||Cation-transporting P-type ATPase, C-terminal||P-type ATPase, subfamily IIC||HAD-like domain||Cation-transporting P-type ATPase, N-terminal||P-type ATPase||P-type ATPase, A domain	0.958498	4.6039e-05
LNC_000269	XLOC_023130	--	Novel_lncRNA	ENSMUST00000099396	ENSMUSG00000054027	Nt5dc3	HAD-like domain||Purine 5'-nucleotidase||HAD-superfamily hydrolase, subfamily IG, 5'-nucleotidase	0.956221	5.53796e-05
LNC_000269	XLOC_023130	--	Novel_lncRNA	ENSMUST00000068023	ENSMUSG00000054793	Cadm4	Neurexin/syndecan/glycophorin C||Immunoglobulin V-set domain||Immunoglobulin subtype||Immunoglobulin-like domain||Immunoglobulin subtype 2||CD80-like, immunoglobulin C2-set	0.954081	6.53076e-05
LNC_000269	XLOC_023130	--	Novel_lncRNA	ENSMUST00000043335	ENSMUSG00000028573	Fggy	Carbohydrate kinase, FGGY, C-terminal||Carbohydrate kinase, FGGY-related||-||Carbohydrate kinase, FGGY, N-terminal||Carbohydrate kinase, FGGY	0.951641	7.80924e-05
LNC_000269	XLOC_023130	--	Novel_lncRNA	ENSMUST00000143829	ENSMUSG00000036087	Slain2	SLAIN motif-containing protein	0.975933	6.95479e-06
LNC_000269	XLOC_023130	--	Novel_lncRNA	ENSMUST00000121820	ENSMUSG00000058297	Spock2	SPARC/Testican, calcium-binding domain||Kazal domain||Thyroglobulin type-1	0.954878	6.14736e-05
LNC_000269	XLOC_023130	--	Novel_lncRNA	ENSMUST00000049206	ENSMUSG00000021895	Arhgef3	Pleckstrin homology domain||Guanine-nucleotide dissociation stimulator, CDC24, conserved site||Dbl homology (DH) domain	0.969055	1.66517e-05
LNC_000269	XLOC_023130	--	Novel_lncRNA	ENSMUST00000164566	ENSMUSG00000038528	BC021785	-||Major facilitator superfamily domain||Major facilitator superfamily	-0.966191	2.26346e-05
LNC_000269	XLOC_023130	--	Novel_lncRNA	ENSMUST00000113355	ENSMUSG00000030064	Frmd4b	Band 4.1 domain||FERM, N-terminal||Protein of unknown function DUF3338||FERM conserved site||FERM central domain||Ubiquitin-related domain||FERM, C-terminal PH-like domain||FERM domain	0.952818	7.1723e-05
LNC_000269	XLOC_023130	--	Novel_lncRNA	ENSMUST00000027233	ENSMUSG00000026065	Slc9a4	Na+/H+ exchanger||Cation/H+ exchanger||Na+/H+ exchanger, isoform 2 (NHE2)	0.960222	3.97524e-05
LNC_000269	XLOC_023130	--	Novel_lncRNA	ENSMUST00000111178	ENSMUSG00000020658	Efr3b	Armadillo-type fold	-0.963601	2.92348e-05
LNC_000269	XLOC_023130	--	Novel_lncRNA	ENSMUST00000057979	ENSMUSG00000022383	Ppara	Nuclear hormone receptor, ligand-binding domain||Nuclear hormone receptor||Peroxisome proliferator-activated receptor||Zinc finger, nuclear hormone receptor-type||Peroxisome proliferator-activated receptor, alpha	0.953158	6.99554e-05
LNC_000269	XLOC_023130	--	Novel_lncRNA	ENSMUST00000041616	ENSMUSG00000032788	Pdxk	Carbohydrate kinase PfkB||Pyridoxal phosphate (active vitamin B6) biosynthesis, pyridoxal kinase||Ribokinase-like	0.952053	7.58191e-05
LNC_000269	XLOC_023130	--	Novel_lncRNA	ENSMUST00000076891	ENSMUSG00000024982	Zdhhc6	Variant SH3 domain||SH3 domain||Zinc finger, DHHC-type, palmitoyltransferase	-0.953419	6.86194e-05
LNC_000269	XLOC_023130	--	Novel_lncRNA	ENSMUST00000030765	ENSMUSG00000028927	Padi2	Protein-arginine deiminase||Protein-arginine deiminase, C-terminal||Protein-arginine deiminase (PAD) N-terminal||Protein-arginine deiminase (PAD), central domain||Cupredoxin	0.966228	2.25504e-05
LNC_000269	XLOC_023130	--	Novel_lncRNA	ENSMUST00000034600	ENSMUSG00000032092	Mpzl2	Immunoglobulin V-set domain||Immunoglobulin subtype||Immunoglobulin-like domain||Myelin P0 protein-related	0.951046	8.14601e-05
LNC_000269	XLOC_023130	--	Novel_lncRNA	ENSMUST00000026210	ENSMUSG00000025196	Cpn1	Carboxypeptidase-like, regulatory domain||Peptidase M14, carboxypeptidase A	0.951923	7.65307e-05
LNC_000269	XLOC_023130	--	Novel_lncRNA	ENSMUST00000029465	ENSMUSG00000027871	Hsd3b1	3-beta hydroxysteroid dehydrogenase/isomerase	0.957997	4.79909e-05
LNC_000269	XLOC_023130	--	Novel_lncRNA	ENSMUST00000022322	ENSMUSG00000021794	Glud1	Glutamate/phenylalanine/leucine/valine dehydrogenase, dimerisation domain||Glutamate/phenylalanine/leucine/valine dehydrogenase, C-terminal||Glutamate/phenylalanine/leucine/valine dehydrogenase	0.953121	7.01476e-05
LNC_000269	XLOC_023130	--	Novel_lncRNA	ENSMUST00000109422	ENSMUSG00000022383	Ppara	Nuclear hormone receptor, ligand-binding domain||Nuclear hormone receptor||Peroxisome proliferator-activated receptor||Zinc finger, nuclear hormone receptor-type||Peroxisome proliferator-activated receptor, alpha	0.955464	5.87592e-05
LNC_000269	XLOC_023130	--	Novel_lncRNA	ENSMUST00000105894	ENSMUSG00000003644	Rps6ka1	Protein kinase, C-terminal||Serine/threonine-protein kinase, active site||Ribosomal protein S6 kinase II||Protein kinase-like domain||Protein kinase, ATP binding site||AGC-kinase, C-terminal||Protein kinase domain||Serine/threonine/dual specificity protein kinase, catalytic domain	0.972037	1.17143e-05
LNC_000269	XLOC_023130	--	Novel_lncRNA	ENSMUST00000161576	ENSMUSG00000031770	Herpud1	Ubiquitin-related domain||Ubiquitin domain	0.95231	7.44263e-05
LNC_000269	XLOC_023130	--	Novel_lncRNA	ENSMUST00000029400	ENSMUSG00000027820	Mme	Peptidase M13, C-terminal domain||Peptidase M13, N-terminal domain	-0.978585	4.63428e-06
LNC_000269	XLOC_023130	--	Novel_lncRNA	ENSMUST00000143914	ENSMUSG00000064310	Zpld1	Zona pellucida domain	-0.979234	4.16349e-06
LNC_000269	XLOC_023130	--	Novel_lncRNA	ENSMUST00000028347	ENSMUSG00000026970	Rbms1	Paraneoplastic encephalomyelitis antigen||RNA recognition motif domain	-0.956937	5.23098e-05
LNC_000269	XLOC_023130	--	Novel_lncRNA	ENSMUST00000131487	ENSMUSG00000040596	Pogk	HTH CenpB-type DNA-binding domain||-||DDE superfamily endonuclease, CENP-B-like||Krueppel-associated box||Homeodomain-like||Brinker DNA-binding domain	0.962672	3.18992e-05
LNC_000269	XLOC_023130	--	Novel_lncRNA	ENSMUST00000113216	ENSMUSG00000060961	Slc4a4	Band 3 cytoplasmic domain||Bicarbonate transporter, eukaryotic||Bicarbonate transporter, C-terminal||Phosphotransferase/anion transporter||Sodium bicarbonate cotransporter||-	0.953736	6.70157e-05
LNC_000269	XLOC_023130	--	Novel_lncRNA	ENSMUST00000115453	ENSMUSG00000007655	Cav1	-||Caveolin||Caveolin, conserved site	0.976127	6.76234e-06
LNC_000269	XLOC_023130	--	Novel_lncRNA	ENSMUST00000090433	ENSMUSG00000020823	Sec14l1	CRAL/TRIO, N-terminal domain||CRAL-TRIO lipid binding domain||PRELI/MSF1 domain||GOLD domain	0.955144	6.02318e-05
LNC_000324	XLOC_030393	--	Novel_lncRNA	ENSMUST00000150989	ENSMUSG00000090173	Fbxw10	WD40 repeat||F-box domain||G-protein beta WD-40 repeat||WD40-repeat-containing domain	0.983752	1.77205e-06
LNC_000324	XLOC_030393	--	Novel_lncRNA	ENSMUST00000029795	ENSMUSG00000028150	Rorc	Nuclear receptor ROR||Nuclear hormone receptor||Zinc finger, nuclear hormone receptor-type||Nuclear hormone receptor, ligand-binding domain	-0.958209	4.71589e-05
LNC_000324	XLOC_030393	--	Novel_lncRNA	ENSMUST00000126939	ENSMUSG00000030244	Gys2	Glycogen synthase||-	0.99277	1.05054e-07
LNC_000324	XLOC_030393	--	Novel_lncRNA	ENSMUST00000141971	ENSMUSG00000022679	Mpv17l	Mpv17/PMP22||-	0.973608	9.58344e-06
LNC_000324	XLOC_030393	--	Novel_lncRNA	ENSMUST00000062684	ENSMUSG00000043252	Tmem64	-	0.986306	9.7628e-07
LNC_000324	XLOC_030393	--	Novel_lncRNA	ENSMUST00000120310	ENSMUSG00000028194	Ddah1	Amidinotransferase	0.959315	4.29782e-05
LNC_000324	XLOC_030393	--	Novel_lncRNA	ENSMUST00000034243	ENSMUSG00000031790	Mmp15	Peptidoglycan binding-like||Hemopexin-like repeats||Peptidase, metallopeptidase||Hemopexin, conserved site||Hemopexin-like domain||Peptidase M10A, stromelysin-type||Peptidase M10A, matrix metallopeptidase, C-terminal||Peptidase M10, metallopeptidase||Peptidase M10A||Peptidase M10A, cysteine switch, zinc binding site	0.954306	6.42069e-05
LNC_000324	XLOC_030393	--	Novel_lncRNA	ENSMUST00000134504	ENSMUSG00000054555	Adam12	ADAM, cysteine-rich||EGF-like domain||Disintegrin domain||Peptidase M12B, ADAM/reprolysin||Disintegrin, conserved site||Peptidase M12B, propeptide	0.956425	5.44895e-05
LNC_000324	XLOC_030393	--	Novel_lncRNA	ENSMUST00000193682	ENSMUSG00000026074	Map4k4	Protein kinase, ATP binding site||-||Protein kinase-like domain||Serine/threonine/dual specificity protein kinase, catalytic domain||Protein kinase domain||Serine/threonine-protein kinase, active site||Citron homology (CNH) domain	0.993503	7.23105e-08
LNC_000324	XLOC_030393	--	Novel_lncRNA	ENSMUST00000020630	ENSMUSG00000020361	Hspa4	Heat shock protein 70 family||Heat shock protein 70kD, C-terminal domain||Heat shock protein 70, conserved site||Heat shock protein 70kD, peptide-binding domain	0.968142	1.84187e-05
LNC_000324	XLOC_030393	--	Novel_lncRNA	ENSMUST00000144856	ENSMUSG00000089917	Uckl1	-||Phosphoribosyltransferase-like||P-loop containing nucleoside triphosphate hydrolase||Phosphoribulokinase/uridine kinase||Uridine kinase-like	0.954585	6.28619e-05
LNC_000324	XLOC_030393	--	Novel_lncRNA	ENSMUST00000108259	ENSMUSG00000037661	Gpr160	-||GPCR, rhodopsin-like, 7TM	-0.962676	3.18876e-05
LNC_000324	XLOC_030393	--	Novel_lncRNA	ENSMUST00000163865	ENSMUSG00000024043	Arhgap28	Rho GTPase-activating protein domain||Rho GTPase activation protein	0.974527	8.47265e-06
LNC_000324	XLOC_030393	--	Novel_lncRNA	ENSMUST00000118447	ENSMUSG00000030167	Klrc1	C-type lectin fold||C-type lectin	0.97728	5.69295e-06
LNC_000324	XLOC_030393	--	Novel_lncRNA	ENSMUST00000200785	ENSMUSG00000036087	Slain2	SLAIN motif-containing protein	0.969366	1.6079e-05
LNC_000324	XLOC_030393	--	Novel_lncRNA	ENSMUST00000089017	ENSMUSG00000033487	Fndc3a	-||Fibronectin type III	0.951208	8.0533e-05
LNC_000324	XLOC_030393	--	Novel_lncRNA	ENSMUST00000084434	ENSMUSG00000025508	Rplp2	-	-0.964621	2.64907e-05
LNC_000324	XLOC_030393	--	Novel_lncRNA	ENSMUST00000171797	ENSMUSG00000058799	Nap1l1	Nucleosome assembly protein (NAP)	0.95143	7.92757e-05
LNC_000324	XLOC_030393	--	Novel_lncRNA	ENSMUST00000033463	ENSMUSG00000031129	Slc9a9	Na+/H+ exchanger||Na+/H+ exchanger, isoform 6 (NHE6)||Cation/H+ exchanger	0.953574	6.78335e-05
LNC_000324	XLOC_030393	--	Novel_lncRNA	ENSMUST00000173454	ENSMUSG00000079557	2019-03-02	Zinc finger, RING-CH-type||-	0.951098	8.11631e-05
LNC_000324	XLOC_030393	--	Novel_lncRNA	ENSMUST00000175693	ENSMUSG00000034460	Six4	Homeobox, conserved site||Homeobox domain||Homeodomain-like	-0.9508	8.28838e-05
LNC_000324	XLOC_030393	--	Novel_lncRNA	ENSMUST00000030731	ENSMUSG00000028899	Taf12	Transcription initiation factor TFIID||Histone-fold	0.959104	4.37554e-05
LNC_000324	XLOC_030393	--	Novel_lncRNA	ENSMUST00000154623	ENSMUSG00000020744	Slc25a19	Mitochondrial substrate/solute carrier||-||Mitochondrial carrier protein	0.964436	2.69759e-05
LNC_000324	XLOC_030393	--	Novel_lncRNA	ENSMUST00000147545	ENSMUSG00000048701	Ccdc6	Protein of unknown function DUF2046	0.950008	8.75741e-05
LNC_000324	XLOC_030393	--	Novel_lncRNA	ENSMUST00000169772	ENSMUSG00000038305	Spats2l	UBA-like||Protein of unknown function DUF1387	0.964959	2.56257e-05
LNC_000324	XLOC_030393	--	Novel_lncRNA	ENSMUST00000133433	ENSMUSG00000037143	Cfap61	-||Acyl-CoA N-acyltransferase	0.958739	4.51207e-05
LNC_000324	XLOC_030393	--	Novel_lncRNA	ENSMUST00000064941	ENSMUSG00000020889	Nr1d1	Nuclear hormone receptor||Zinc finger, nuclear hormone receptor-type||Nuclear hormone receptor, ligand-binding domain	0.953877	6.63162e-05
LNC_000324	XLOC_030393	--	Novel_lncRNA	ENSMUST00000119512	ENSMUSG00000044252	Osbpl1a	Oxysterol-binding protein, conserved site||-||Ankyrin repeat-containing domain||Oxysterol-binding protein||Pleckstrin homology domain||Ankyrin repeat	0.979481	3.99386e-06
LNC_000324	XLOC_030393	--	Novel_lncRNA	ENSMUST00000138112	ENSMUSG00000019767	Ccdc170	-	0.970188	1.46304e-05
LNC_000324	XLOC_030393	--	Novel_lncRNA	ENSMUST00000123864	ENSMUSG00000035172	Plekhh3	Band 4.1 domain||FERM domain||FERM central domain||MyTH4 domain||Ras-associating (RA) domain||Pleckstrin homology domain	0.982667	2.21956e-06
LNC_000324	XLOC_030393	--	Novel_lncRNA	ENSMUST00000141359	ENSMUSG00000015189	Casd1	-||PC-Esterase||Cas1p 10 TM acyl transferase domain||Cyclin-like	0.986168	1.01118e-06
LNC_000324	XLOC_030393	--	Novel_lncRNA	ENSMUST00000054551	ENSMUSG00000046999	1110032F04Rik	-	0.961492	3.55303e-05
LNC_000324	XLOC_030393	--	Novel_lncRNA	ENSMUST00000109641	ENSMUSG00000078974	Sec61g	Protein translocase complex, SecE/Sec61-gamma subunit||Protein translocase SEC61 complex, gamma subunit	0.989182	4.29038e-07
LNC_000324	XLOC_030393	--	Novel_lncRNA	ENSMUST00000206340	ENSMUSG00000049739	Zfp646	Zinc finger, C2H2-like||Zinc finger, C2H2	-0.950529	8.44654e-05
LNC_000324	XLOC_030393	--	Novel_lncRNA	ENSMUST00000130509	ENSMUSG00000051506	Wdfy4	WD40 repeat||-||Armadillo-type fold||PH-BEACH domain||WD40 repeat, conserved site||BEACH domain||WD40-repeat-containing domain	0.960993	3.71478e-05
LNC_000324	XLOC_030393	--	Novel_lncRNA	ENSMUST00000060484	ENSMUSG00000049037	Clec4a1	C-type lectin||C-type lectin fold	0.967195	2.03887e-05
LNC_000324	XLOC_030393	--	Novel_lncRNA	ENSMUST00000132338	ENSMUSG00000002320	Tm9sf1	Nonaspanin (TM9SF)	0.967799	1.91164e-05
LNC_000324	XLOC_030393	--	Novel_lncRNA	ENSMUST00000001185	ENSMUSG00000001157	Gmcl1	BTB/Kelch-associated||BTB/POZ domain||POZ domain	0.957805	4.87524e-05
LNC_000324	XLOC_030393	--	Novel_lncRNA	ENSMUST00000117830	ENSMUSG00000029911	Ssbp1	Single-stranded DNA-binding protein||Nucleic acid-binding, OB-fold||Primosome PriB/single-strand DNA-binding	0.991586	1.78425e-07
LNC_000324	XLOC_030393	--	Novel_lncRNA	ENSMUST00000036355	ENSMUSG00000033149	Phldb2	Pleckstrin homology domain||-	0.953207	6.97022e-05
LNC_000324	XLOC_030393	--	Novel_lncRNA	ENSMUST00000112028	ENSMUSG00000025198	Erlin1	Band 7 protein||-	0.975849	7.0397e-06
LNC_000324	XLOC_030393	--	Novel_lncRNA	ENSMUST00000063520	ENSMUSG00000022698	Naa50	GNAT domain||Acyl-CoA N-acyltransferase	0.965028	2.54509e-05
LNC_000324	XLOC_030393	--	Novel_lncRNA	ENSMUST00000107004	ENSMUSG00000073792	Alg6	Glycosyl transferase, ALG6/ALG8	0.957158	5.13854e-05
LNC_000324	XLOC_030393	--	Novel_lncRNA	ENSMUST00000114871	ENSMUSG00000062184	Hs6st2	Sulfotransferase||P-loop containing nucleoside triphosphate hydrolase	0.993442	7.47403e-08
LNC_000324	XLOC_030393	--	Novel_lncRNA	ENSMUST00000034022	ENSMUSG00000031609	Sap30	Histone deacetylase complex subunit SAP30 zinc-finger||Histone deacetylase complex subunit SAP30, Sin3 binding domain	0.960951	3.72883e-05
LNC_000324	XLOC_030393	--	Novel_lncRNA	ENSMUST00000172032	ENSMUSG00000091813	Ces2h	Carboxylesterase type B, conserved site||Carboxylesterase, type B||Carboxylesterase type B, active site||Alpha/Beta hydrolase fold	0.967987	1.87325e-05
LNC_000324	XLOC_030393	--	Novel_lncRNA	ENSMUST00000061468	ENSMUSG00000030814	Bcl7c	BCL7||-	-0.980164	3.54968e-06
LNC_000324	XLOC_030393	--	Novel_lncRNA	ENSMUST00000039506	ENSMUSG00000038034	Igsf8	Immunoglobulin-like domain||Immunoglobulin subtype||Immunoglobulin V-set domain||-	-0.959086	4.38223e-05
LNC_000324	XLOC_030393	--	Novel_lncRNA	ENSMUST00000030541	ENSMUSG00000028759	Hp1bp3	Linker histone H1/H5, domain H15||Histone H5||-	0.95722	5.11321e-05
LNC_000324	XLOC_030393	--	Novel_lncRNA	ENSMUST00000179741	ENSMUSG00000094635	Gm7104	Ribonuclease H-like domain||Exonuclease, RNase T/DNA polymerase III	0.95884	4.47392e-05
LNC_000324	XLOC_030393	--	Novel_lncRNA	ENSMUST00000141606	ENSMUSG00000002279	Lmf1	-||Lipase maturation factor	0.955194	6.00007e-05
ENSMUST00000180982.1	ENSMUSG00000097073.7	9430037G07Rik	Annotated_lncRNA	ENSMUST00000151129	ENSMUSG00000028691	Prdx1	Alkyl hydroperoxide reductase subunit C/ Thiol specific antioxidant||Peroxiredoxin, C-terminal||Peroxiredoxin, AhpC-type||Thioredoxin-like fold	-0.970651	1.38573e-05
ENSMUST00000180982.1	ENSMUSG00000097073.7	9430037G07Rik	Annotated_lncRNA	ENSMUST00000198931	ENSMUSG00000031292	Cdkl5	Serine/threonine-protein kinase, active site||Protein kinase domain||Protein kinase, ATP binding site||Protein kinase-like domain||Serine/threonine/dual specificity protein kinase, catalytic domain	0.95481	6.1794e-05
ENSMUST00000180982.1	ENSMUSG00000097073.7	9430037G07Rik	Annotated_lncRNA	ENSMUST00000085453	ENSMUSG00000041696	Rasl12	Small GTPase superfamily||Small GTPase superfamily, Rho type||P-loop containing nucleoside triphosphate hydrolase||Small GTP-binding protein domain||Small GTPase superfamily, Ras type||Small GTPase superfamily, Rab type	0.970739	1.37122e-05
ENSMUST00000180982.1	ENSMUSG00000097073.7	9430037G07Rik	Annotated_lncRNA	ENSMUST00000107950	ENSMUSG00000045411	2410002F23Rik	-	0.953684	6.72783e-05
ENSMUST00000180982.1	ENSMUSG00000097073.7	9430037G07Rik	Annotated_lncRNA	ENSMUST00000124341	ENSMUSG00000006576	Slc4a3	Bicarbonate transporter, eukaryotic||Anion exchange protein||-||Anion exchange, conserved site||Bicarbonate transporter, C-terminal||Band 3 cytoplasmic domain||Anion exchange protein 3||Phosphotransferase/anion transporter	0.953102	7.02449e-05
ENSMUST00000180982.1	ENSMUSG00000097073.7	9430037G07Rik	Annotated_lncRNA	ENSMUST00000049248	ENSMUSG00000032688	Malt1	Peptidase C14, caspase domain||Peptidase C14, ICE, catalytic subunit p20||Immunoglobulin-like domain||Immunoglobulin subtype 2||Immunoglobulin subtype||Death-like domain	-0.957324	5.07031e-05
ENSMUST00000180982.1	ENSMUSG00000097073.7	9430037G07Rik	Annotated_lncRNA	ENSMUST00000172868	ENSMUSG00000015120	Ube2i	Ubiquitin-conjugating enzyme, active site||Ubiquitin-conjugating enzyme E2||-||Ubiquitin-conjugating enzyme/RWD-like	0.953413	6.86499e-05
ENSMUST00000180982.1	ENSMUSG00000097073.7	9430037G07Rik	Annotated_lncRNA	ENSMUST00000001253	ENSMUSG00000020651	Slc26a4	Sulphate anion transporter, conserved site||STAS domain||SLC26A/SulP transporter domain||SLC26A/SulP transporter	0.951515	7.87978e-05
ENSMUST00000180982.1	ENSMUSG00000097073.7	9430037G07Rik	Annotated_lncRNA	ENSMUST00000198631	ENSMUSG00000029484	Anxa3	Annexin repeat||-||Annexin repeat, conserved site||Annexin, type III||Annexin	0.964411	2.70419e-05
ENSMUST00000180982.1	ENSMUSG00000097073.7	9430037G07Rik	Annotated_lncRNA	ENSMUST00000110888	ENSMUSG00000022010	Tsc22d1	-||TSC-22 / Dip / Bun	0.961655	3.50103e-05
ENSMUST00000180982.1	ENSMUSG00000097073.7	9430037G07Rik	Annotated_lncRNA	ENSMUST00000081747	ENSMUSG00000060512	0610040J01Rik	-	0.955584	5.82126e-05
ENSMUST00000180982.1	ENSMUSG00000097073.7	9430037G07Rik	Annotated_lncRNA	ENSMUST00000103220	ENSMUSG00000003660	Snrnp200	P-loop containing nucleoside triphosphate hydrolase||Helicase, C-terminal||Sec63 domain||DEAD/DEAH box helicase domain||Immunoglobulin E-set||Helicase superfamily 1/2, ATP-binding domain	-0.960937	3.73345e-05
ENSMUST00000180982.1	ENSMUSG00000097073.7	9430037G07Rik	Annotated_lncRNA	ENSMUST00000110164	ENSMUSG00000027341	Tmem230	Protein of unknown function DUF872, transmembrane	0.97854	4.66849e-06
ENSMUST00000180982.1	ENSMUSG00000097073.7	9430037G07Rik	Annotated_lncRNA	ENSMUST00000030771	ENSMUSG00000029014	Dnajc2	DnaJ domain, conserved site||DnaJ domain||Myb domain||Homeodomain-like||SANT/Myb domain||SANT domain	-0.966366	2.22324e-05
ENSMUST00000180982.1	ENSMUSG00000097073.7	9430037G07Rik	Annotated_lncRNA	ENSMUST00000028841	ENSMUSG00000027363	Usp8	Ubiquitin specific protease, conserved site||Ubiquitin specific protease domain||USP8 dimerisation domain||Peptidase C19, ubiquitin carboxyl-terminal hydrolase||Rhodanese-like domain	-0.956003	5.63373e-05
ENSMUST00000180982.1	ENSMUSG00000097073.7	9430037G07Rik	Annotated_lncRNA	ENSMUST00000149579	ENSMUSG00000039219	Arid4b	RNA binding activity-knot of a chromodomain||RBB1NT||Tudor domain||Chromo domain-like||ARID DNA-binding domain	0.952916	7.12113e-05
ENSMUST00000180982.1	ENSMUSG00000097073.7	9430037G07Rik	Annotated_lncRNA	ENSMUST00000025234	ENSMUSG00000024376	Epb41l4a	FERM domain||FERM, C-terminal PH-like domain||FERM central domain||FERM conserved site||Ubiquitin-related domain||Ezrin/radixin/moesin-like||FERM adjacent (FA)||Band 4.1 domain||FERM, N-terminal	0.954438	6.3572e-05
ENSMUST00000180982.1	ENSMUSG00000097073.7	9430037G07Rik	Annotated_lncRNA	ENSMUST00000061071	ENSMUSG00000044667	Lppr4	Phosphatidic acid phosphatase type 2/haloperoxidase	0.95021	8.63629e-05
ENSMUST00000180982.1	ENSMUSG00000097073.7	9430037G07Rik	Annotated_lncRNA	ENSMUST00000071430	ENSMUSG00000062619	2310039H08Rik	-	-0.953793	6.67321e-05
ENSMUST00000180982.1	ENSMUSG00000097073.7	9430037G07Rik	Annotated_lncRNA	ENSMUST00000098524	ENSMUSG00000011008	Mcoln2	-||Polycystin cation channel, PKD1/PKD2	-0.964032	2.80518e-05
ENSMUST00000180982.1	ENSMUSG00000097073.7	9430037G07Rik	Annotated_lncRNA	ENSMUST00000029630	ENSMUSG00000028001	Fga	Fibrinogen, alpha/beta/gamma chain, C-terminal globular domain||Fibrinogen, conserved site||Fibrinogen, alpha/beta/gamma chain, coiled coil domain||Fibrinogen alpha C domain	0.968811	1.71121e-05
ENSMUST00000180982.1	ENSMUSG00000097073.7	9430037G07Rik	Annotated_lncRNA	ENSMUST00000038422	ENSMUSG00000034168	Irf2bpl	Interferon regulatory factor 2-binding protein 1 &amp; 2, zinc finger	0.951286	8.00897e-05
ENSMUST00000180982.1	ENSMUSG00000097073.7	9430037G07Rik	Annotated_lncRNA	ENSMUST00000077196	ENSMUSG00000037185	Krt80	Keratin, type II||Intermediate filament protein	0.958759	4.50464e-05
ENSMUST00000180982.1	ENSMUSG00000097073.7	9430037G07Rik	Annotated_lncRNA	ENSMUST00000109594	ENSMUSG00000020142	Slc1a4	Sodium:dicarboxylate symporter||Sodium:dicarboxylate symporter, conserved site	-0.979318	4.10525e-06
ENSMUST00000180982.1	ENSMUSG00000097073.7	9430037G07Rik	Annotated_lncRNA	ENSMUST00000048706	ENSMUSG00000040044	Orc3	Armadillo-type fold||Origin recognition complex, subunit 3	-0.950638	8.38253e-05
ENSMUST00000180982.1	ENSMUSG00000097073.7	9430037G07Rik	Annotated_lncRNA	ENSMUST00000102759	ENSMUSG00000055371	Stam2	ENTH/VHS||Ubiquitin interacting motif||SH3 domain||VHS domain||-||VHS subgroup	-0.961328	3.60553e-05
ENSMUST00000180982.1	ENSMUSG00000097073.7	9430037G07Rik	Annotated_lncRNA	ENSMUST00000071370	ENSMUSG00000035566	Pcdh17	Cadherin-like||Cadherin, N-terminal||Cadherin||Cadherin conserved site	-0.952039	7.58965e-05
ENSMUST00000180982.1	ENSMUSG00000097073.7	9430037G07Rik	Annotated_lncRNA	ENSMUST00000069430	ENSMUSG00000021000	Ctage5	-	-0.98258	2.25841e-06
ENSMUST00000180982.1	ENSMUSG00000097073.7	9430037G07Rik	Annotated_lncRNA	ENSMUST00000154602	ENSMUSG00000040167	Ikzf5	Zinc finger, C2H2-like||Zinc finger, C2H2||-	-0.955496	5.86117e-05
ENSMUST00000180982.1	ENSMUSG00000097073.7	9430037G07Rik	Annotated_lncRNA	ENSMUST00000066583	ENSMUSG00000053861	Gm9925	-	0.950837	8.26637e-05
ENSMUST00000180982.1	ENSMUSG00000097073.7	9430037G07Rik	Annotated_lncRNA	ENSMUST00000163588	ENSMUSG00000033855	Ston1	-||Mu homology domain||Stonin||Stonin homology	0.960257	3.96334e-05
ENSMUST00000180982.1	ENSMUSG00000097073.7	9430037G07Rik	Annotated_lncRNA	ENSMUST00000058997	ENSMUSG00000044646	Zbtb7c	Zinc finger, C2H2-like||POZ domain||BTB/POZ domain||Zinc finger, C2H2||Armadillo-type fold	0.959898	4.08851e-05
ENSMUST00000180982.1	ENSMUSG00000097073.7	9430037G07Rik	Annotated_lncRNA	ENSMUST00000168665	ENSMUSG00000032403	2300009A05Rik	Protein of unknown function DUF4528	-0.951781	7.73136e-05
ENSMUST00000180982.1	ENSMUSG00000097073.7	9430037G07Rik	Annotated_lncRNA	ENSMUST00000029447	ENSMUSG00000027854	Sike1	Suppressor of IKBKE 1	0.960092	4.02051e-05
ENSMUST00000180982.1	ENSMUSG00000097073.7	9430037G07Rik	Annotated_lncRNA	ENSMUST00000001226	ENSMUSG00000022436	Sh3bp1	Rho GTPase-activating protein domain||Rho GTPase activation protein||2-phosphoglycolate phosphatase, eukaryotic||BAR domain||-||HAD-like domain||HAD-superfamily hydrolase, subfamily IIA	0.953025	7.06438e-05
ENSMUST00000180982.1	ENSMUSG00000097073.7	9430037G07Rik	Annotated_lncRNA	ENSMUST00000159068	ENSMUSG00000045875	Adra1a	Adrenoceptor family||Alpha 1A adrenoceptor||G protein-coupled receptor, rhodopsin-like||GPCR, rhodopsin-like, 7TM	0.954965	6.1063e-05
ENSMUST00000180982.1	ENSMUSG00000097073.7	9430037G07Rik	Annotated_lncRNA	ENSMUST00000124830	ENSMUSG00000054889	Dsp	Plectin repeat||Spectrin/alpha-actinin	0.954242	6.45187e-05
ENSMUST00000180982.1	ENSMUSG00000097073.7	9430037G07Rik	Annotated_lncRNA	ENSMUST00000027071	ENSMUSG00000025937	Lactb2	Metallo-beta-lactamase	-0.950296	8.58464e-05
ENSMUST00000180982.1	ENSMUSG00000097073.7	9430037G07Rik	Annotated_lncRNA	ENSMUST00000166420	ENSMUSG00000005125	Ndrg1	Alpha/Beta hydrolase fold||-||NDRG	0.956715	5.32486e-05
ENSMUST00000180982.1	ENSMUSG00000097073.7	9430037G07Rik	Annotated_lncRNA	ENSMUST00000076034	ENSMUSG00000059479	B3gnt8	Glycosyl transferase, family 31||-	0.972967	1.04159e-05
ENSMUST00000181831.2	ENSMUSG00000097281.2	Gm26685	Annotated_lncRNA	ENSMUST00000143467	ENSMUSG00000016495	Plgrkt	-||Protein of unknown function DUF2368	-0.962795	3.15377e-05
ENSMUST00000181831.2	ENSMUSG00000097281.2	Gm26685	Annotated_lncRNA	ENSMUST00000106079	ENSMUSG00000028796	Phc2	Sterile alpha motif/pointed domain||-||Zinc finger, FCS-type||Sterile alpha motif domain	0.9915	1.84897e-07
ENSMUST00000181831.2	ENSMUSG00000097281.2	Gm26685	Annotated_lncRNA	ENSMUST00000061158	ENSMUSG00000051154	Commd3	HCaRG||COMM domain	-0.953685	6.72745e-05
ENSMUST00000181831.2	ENSMUSG00000097281.2	Gm26685	Annotated_lncRNA	ENSMUST00000031053	ENSMUSG00000029162	Khk	Ribokinase-like||Carbohydrate kinase PfkB	-0.964284	2.73753e-05
ENSMUST00000181831.2	ENSMUSG00000097281.2	Gm26685	Annotated_lncRNA	ENSMUST00000057177	ENSMUSG00000045996	Polr2k	RNA polymerase subunit RPABC4/transcription elongation factor Spt4||RNA polymerase archaeal subunit P/eukaryotic subunit RPABC4	-0.978087	5.01964e-06
ENSMUST00000181831.2	ENSMUSG00000097281.2	Gm26685	Annotated_lncRNA	ENSMUST00000052029	ENSMUSG00000033526	Ppip5k1	Histidine phosphatase superfamily, clade-2||-||Histidine phosphatase superfamily	0.97467	8.30887e-06
ENSMUST00000181831.2	ENSMUSG00000097281.2	Gm26685	Annotated_lncRNA	ENSMUST00000072093	ENSMUSG00000053646	Plxnb1	Rho GTPase activation protein||Plexin, cytoplasmic RasGAP domain||Sema domain||Plexin repeat||Immunoglobulin E-set||IPT domain||Plexin-like fold	0.950995	8.17524e-05
ENSMUST00000181831.2	ENSMUSG00000097281.2	Gm26685	Annotated_lncRNA	ENSMUST00000073713	ENSMUSG00000063713	Klk1b24	Peptidase S1, trypsin family, active site||Peptidase S1A, chymotrypsin-type||Peptidase S1, PA clan||Serine proteases, trypsin domain	0.956375	5.47071e-05
ENSMUST00000181831.2	ENSMUSG00000097281.2	Gm26685	Annotated_lncRNA	ENSMUST00000163499	ENSMUSG00000022119	Rbm26	RNA recognition motif domain||Zinc finger, CCCH-type||PWI domain	0.967398	1.99551e-05
ENSMUST00000181831.2	ENSMUSG00000097281.2	Gm26685	Annotated_lncRNA	ENSMUST00000199736	ENSMUSG00000032482	Cspg5	Neural chondroitin sulphate proteoglycan cytoplasmic||Chondroitin sulphate attachment	0.956019	5.6267e-05
ENSMUST00000181831.2	ENSMUSG00000097281.2	Gm26685	Annotated_lncRNA	ENSMUST00000108511	ENSMUSG00000020811	Wscd1	-||P-loop containing nucleoside triphosphate hydrolase||Carbohydrate-binding WSC, subgroup||Carbohydrate-binding WSC||Sulfotransferase domain	0.954236	6.45485e-05
ENSMUST00000181831.2	ENSMUSG00000097281.2	Gm26685	Annotated_lncRNA	ENSMUST00000036248	ENSMUSG00000038400	Pmepa1	-	0.994938	3.02354e-08
ENSMUST00000181831.2	ENSMUSG00000097281.2	Gm26685	Annotated_lncRNA	ENSMUST00000042771	ENSMUSG00000035673	Sbno2	P-loop containing nucleoside triphosphate hydrolase||Strawberry notch, helicase C domain	0.958549	4.58429e-05
ENSMUST00000181831.2	ENSMUSG00000097281.2	Gm26685	Annotated_lncRNA	ENSMUST00000135579	ENSMUSG00000028906	Epb41	SAB domain||Band 4.1 domain||FERM, N-terminal||FERM adjacent (FA)||Band 4.1, C-terminal||FERM conserved site||FERM central domain||Ubiquitin-related domain||Ezrin/radixin/moesin-like||FERM domain||FERM, C-terminal PH-like domain	0.951115	8.10648e-05
ENSMUST00000181831.2	ENSMUSG00000097281.2	Gm26685	Annotated_lncRNA	ENSMUST00000046071	ENSMUSG00000042115	Klhdc8a	Kelch repeat type 1	0.975301	7.61085e-06
ENSMUST00000181831.2	ENSMUSG00000097281.2	Gm26685	Annotated_lncRNA	ENSMUST00000050949	ENSMUSG00000041143	Tmco4	Alpha/Beta hydrolase fold||Protein of unknown function DUF726||-	0.957708	4.91411e-05
ENSMUST00000181831.2	ENSMUSG00000097281.2	Gm26685	Annotated_lncRNA	ENSMUST00000022589	ENSMUSG00000022012	Enox1	RNA recognition motif domain	0.965083	2.53129e-05
ENSMUST00000181831.2	ENSMUSG00000097281.2	Gm26685	Annotated_lncRNA	ENSMUST00000141718	ENSMUSG00000040811	Eml2	WD40-repeat-containing domain||HELP||WD40 repeat||Quinonprotein alcohol dehydrogenase-like superfamily	0.955424	5.89411e-05
LNC_000080	XLOC_008443	--	Novel_lncRNA	ENSMUST00000159880	ENSMUSG00000041831	Sytl3	Rab-binding domain||C2 domain||-||Zinc finger, FYVE/PHD-type	0.950484	8.47322e-05
LNC_000080	XLOC_008443	--	Novel_lncRNA	ENSMUST00000148245	ENSMUSG00000029516	Cit	Protein kinase domain||AGC-kinase, C-terminal||Citron homology (CNH) domain||Citron Rho-interacting kinase||Serine/threonine/dual specificity protein kinase, catalytic domain||Pleckstrin homology domain||Protein kinase C-like, phorbol ester/diacylglycerol-binding domain||Protein kinase, C-terminal||Serine/threonine-protein kinase, active site||-||Protein kinase-like domain||Protein kinase, ATP bi…	0.953114	7.01825e-05
LNC_000080	XLOC_008443	--	Novel_lncRNA	ENSMUST00000032336	ENSMUSG00000030214	Plbd1	Phospholipase B-like	0.964206	2.75842e-05
LNC_000080	XLOC_008443	--	Novel_lncRNA	ENSMUST00000064889	ENSMUSG00000023942	Slc29a1	Equilibrative nucleoside transporter||-||Major facilitator superfamily domain	-0.954456	6.34844e-05
LNC_000080	XLOC_008443	--	Novel_lncRNA	ENSMUST00000099816	ENSMUSG00000075122	Cd80	Immunoglobulin-like domain||CD80-like, immunoglobulin C2-set||Immunoglobulin subtype||Immunoglobulin V-set domain	0.978754	4.50812e-06
LNC_000080	XLOC_008443	--	Novel_lncRNA	ENSMUST00000168594	ENSMUSG00000024858	Adrbk1	Protein kinase, ATP binding site||Protein kinase-like domain||Serine/threonine-protein kinase, active site||RGS domain||Pleckstrin homology domain||GPCR kinase||Serine/threonine/dual specificity protein kinase, catalytic domain||AGC-kinase, C-terminal||Protein kinase domain	0.953222	6.96254e-05
LNC_000080	XLOC_008443	--	Novel_lncRNA	ENSMUST00000178760	ENSMUSG00000046572	Zfp518b	Zinc finger, C2H2||-||Zinc finger, C2H2-like	0.953254	6.9461e-05
LNC_000080	XLOC_008443	--	Novel_lncRNA	ENSMUST00000169603	ENSMUSG00000028780	Sema3c	Immunoglobulin subtype 2||Immunoglobulin-like domain||Immunoglobulin I-set||Plexin-like fold||-||Immunoglobulin subtype||Sema domain	0.956682	5.33873e-05
LNC_000080	XLOC_008443	--	Novel_lncRNA	ENSMUST00000089894	ENSMUSG00000055827	Gsdmc3	Gasdermin	0.964294	2.73512e-05
LNC_000080	XLOC_008443	--	Novel_lncRNA	ENSMUST00000070174	ENSMUSG00000046157	Tmem229b	Putative ABC-transporter type IV CmpB/TMEM229||-	0.951862	7.68673e-05
LNC_000080	XLOC_008443	--	Novel_lncRNA	ENSMUST00000192024	ENSMUSG00000038179	Slamf7	Immunoglobulin-like domain	0.966988	2.08394e-05
LNC_000080	XLOC_008443	--	Novel_lncRNA	ENSMUST00000162925	ENSMUSG00000070031	Sp140	Zinc finger, PHD-type||SAND domain-like||SAND domain||Zinc finger, FYVE/PHD-type||Bromodomain||Zinc finger, PHD-type, conserved site||-||Homogeneously-staining region||Zinc finger, PHD-finger	0.96184	3.443e-05
LNC_000080	XLOC_008443	--	Novel_lncRNA	ENSMUST00000191805	ENSMUSG00000025762	Larp1b	RNA-binding protein Lupus La||Protein of unknown function DM15||-	0.977198	5.76473e-06
LNC_000080	XLOC_008443	--	Novel_lncRNA	ENSMUST00000001202	ENSMUSG00000001173	Ocrl	Inositol polyphosphate-related phosphatase||Rho GTPase-activating protein domain||Rho GTPase activation protein||Endonuclease/exonuclease/phosphatase	0.957692	4.92055e-05
ENSMUST00000181446.7	ENSMUSG00000096972.7	Gm26883	Annotated_lncRNA	ENSMUST00000023554	ENSMUSG00000022848	Dirc2	Major facilitator superfamily domain	-0.958817	4.48257e-05
ENSMUST00000181446.7	ENSMUSG00000096972.7	Gm26883	Annotated_lncRNA	ENSMUST00000092639	ENSMUSG00000019899	Lama2	Laminin G domain||Laminin EGF domain||Laminin alpha, domain I||Laminin domain II||Laminin, N-terminal||Insulin-like growth factor binding protein, N-terminal||Galactose-binding domain-like||Laminin IV||Concanavalin A-like lectin/glucanase domain||EGF-like domain	0.961093	3.68192e-05
ENSMUST00000181446.7	ENSMUSG00000096972.7	Gm26883	Annotated_lncRNA	ENSMUST00000042850	ENSMUSG00000028369	Svep1	EGF-like, conserved site||HYR domain||Sushi/SCR/CCP domain||Insulin-like growth factor binding protein, N-terminal||Tyrosine-protein kinase ephrin type A/B receptor-like||Pentaxin-related||von Willebrand factor, type A||Concanavalin A-like lectin/glucanase domain||EGF-like calcium-binding, conserved site||EGF-like domain||EGF-like calcium-binding domain||EGF-type aspartate/asparagine hydroxylatio…	0.954263	6.44151e-05
ENSMUST00000181446.7	ENSMUSG00000096972.7	Gm26883	Annotated_lncRNA	ENSMUST00000115733	ENSMUSG00000041624	Gucy1a2	Haem NO binding associated||Adenylyl cyclase class-3/4/guanylyl cyclase||Nucleotide cyclase||Heme-NO binding||Adenylyl cyclase class-4/guanylyl cyclase, conserved site||NO signalling/Golgi transport ligand-binding domain	0.953319	6.91264e-05
ENSMUST00000181446.7	ENSMUSG00000096972.7	Gm26883	Annotated_lncRNA	ENSMUST00000095691	ENSMUSG00000038594	Cep85l	-	0.96795	1.88071e-05
ENSMUST00000181446.7	ENSMUSG00000096972.7	Gm26883	Annotated_lncRNA	ENSMUST00000005532	ENSMUSG00000005397	Nid1	EGF-like, conserved site||NIDO domain||Complement Clr-like EGF domain||Insulin-like growth factor binding protein, N-terminal||LDLR class B repeat||EGF domain||Green fluorescent protein||G2 nidogen/fibulin G2F||EGF-like calcium-binding, conserved site||Thyroglobulin type-1||EGF-like domain||EGF-like calcium-binding domain||EGF-type aspartate/asparagine hydroxylation site	0.954522	6.31657e-05
ENSMUST00000181446.7	ENSMUSG00000096972.7	Gm26883	Annotated_lncRNA	ENSMUST00000023600	ENSMUSG00000022883	Robo1	Immunoglobulin V-set domain||Immunoglobulin subtype||Fibronectin type III||Immunoglobulin subtype 2||Immunoglobulin-like domain||Immunoglobulin I-set	0.966159	2.27093e-05
ENSMUST00000181446.7	ENSMUSG00000096972.7	Gm26883	Annotated_lncRNA	ENSMUST00000110602	ENSMUSG00000027242	Wdr76	WD40-repeat-containing domain||WD40 repeat	0.952386	7.40175e-05
ENSMUST00000181446.7	ENSMUSG00000096972.7	Gm26883	Annotated_lncRNA	ENSMUST00000045730	ENSMUSG00000038587	Akap12	RII binding domain||Protein kinase A anchoring, WSK motif	0.953442	6.85016e-05
ENSMUST00000181446.7	ENSMUSG00000096972.7	Gm26883	Annotated_lncRNA	ENSMUST00000069360	ENSMUSG00000055653	Gpc3	Glypican||Glypican, conserved site	0.961444	3.56826e-05
ENSMUST00000181446.7	ENSMUSG00000096972.7	Gm26883	Annotated_lncRNA	ENSMUST00000112574	ENSMUSG00000041649	Klf8	Zinc finger, C2H2||-||Zinc finger, C2H2-like	-0.951468	7.90614e-05
ENSMUST00000181446.7	ENSMUSG00000096972.7	Gm26883	Annotated_lncRNA	ENSMUST00000002677	ENSMUSG00000002602	Axl	Protein kinase domain||Immunoglobulin-like domain||Tyrosine-protein kinase, active site||Tyrosine-protein kinase, catalytic domain||Serine-threonine/tyrosine-protein kinase catalytic domain||Immunoglobulin subtype||Protein kinase, ATP binding site||Fibronectin type III||Protein kinase-like domain	0.95114	8.09189e-05
ENSMUST00000181446.7	ENSMUSG00000096972.7	Gm26883	Annotated_lncRNA	ENSMUST00000022629	ENSMUSG00000022048	Dpysl2	Hydantoinase/dihydropyrimidinase||Metal-dependent hydrolase, composite domain||Amidohydrolase-related	0.965223	2.49624e-05
ENSMUST00000181446.7	ENSMUSG00000096972.7	Gm26883	Annotated_lncRNA	ENSMUST00000114513	ENSMUSG00000026103	Gls	Ankyrin repeat-containing domain||Glutaminase||Ankyrin repeat||Beta-lactamase/transpeptidase-like	-0.95983	4.11253e-05
ENSMUST00000181446.7	ENSMUSG00000096972.7	Gm26883	Annotated_lncRNA	ENSMUST00000020271	ENSMUSG00000020077	Srgn	-||Serglycin	0.953892	6.62395e-05
ENSMUST00000181446.7	ENSMUSG00000096972.7	Gm26883	Annotated_lncRNA	ENSMUST00000176438	ENSMUSG00000026872	Zeb2	Homeodomain-like||Homeobox domain||Zinc finger, C2H2-like||-||Drought induced 19 protein type, zinc-binding domain||Zinc finger, C2H2	0.963288	3.0114e-05
ENSMUST00000181446.7	ENSMUSG00000096972.7	Gm26883	Annotated_lncRNA	ENSMUST00000092706	ENSMUSG00000017499	Cdc6	AAA+ ATPase domain||P-loop containing nucleoside triphosphate hydrolase||Cell division protein Cdc6/18||Cdc6, C-terminal domain	0.97511	7.81776e-06
ENSMUST00000181446.7	ENSMUSG00000096972.7	Gm26883	Annotated_lncRNA	ENSMUST00000075190	ENSMUSG00000031673	Cdh11	Cadherin conserved site||Cadherin, cytoplasmic domain||Cadherin-like||Cadherin	0.955534	5.84403e-05
ENSMUST00000145410.1	ENSMUSG00000085541.1	Gm16010	Annotated_lncRNA	ENSMUST00000151129	ENSMUSG00000028691	Prdx1	Alkyl hydroperoxide reductase subunit C/ Thiol specific antioxidant||Peroxiredoxin, C-terminal||Peroxiredoxin, AhpC-type||Thioredoxin-like fold	-0.979533	3.95845e-06
ENSMUST00000145410.1	ENSMUSG00000085541.1	Gm16010	Annotated_lncRNA	ENSMUST00000038551	ENSMUSG00000034709	Ppp1r21	Uncharacterised domain KLRAQ/TTKRSYEDQ, C-terminal||Uncharacterised domain KLRAQ/TTKRSYEDQ, N-terminal	-0.963029	3.08558e-05
ENSMUST00000145410.1	ENSMUSG00000085541.1	Gm16010	Annotated_lncRNA	ENSMUST00000112498	ENSMUSG00000024074	Crim1	Antistasin-like domain||Insulin-like growth factor binding protein, N-terminal||VWC out||Insulin-like growth factor-binding protein, IGFBP||VWFC domain||Hirudin/antistatin	0.969764	1.5366e-05
ENSMUST00000145410.1	ENSMUSG00000085541.1	Gm16010	Annotated_lncRNA	ENSMUST00000118717	ENSMUSG00000033715	Akr1c14	Aldo/keto reductase, conserved site||NADP-dependent oxidoreductase domain||Aldo/keto reductase subgroup	-0.968595	1.75263e-05
ENSMUST00000145410.1	ENSMUSG00000085541.1	Gm16010	Annotated_lncRNA	ENSMUST00000041065	ENSMUSG00000035441	Myo1d	IQ motif, EF-hand binding site||P-loop containing nucleoside triphosphate hydrolase||Myosin head, motor domain||Unconventional myosin tail, actin- and lipid-binding	0.957627	4.94694e-05
ENSMUST00000145410.1	ENSMUSG00000085541.1	Gm16010	Annotated_lncRNA	ENSMUST00000110457	ENSMUSG00000022272	Myo10	Ras-associating (RA) domain||Myosin head, motor domain||FERM central domain||MyTH4 domain||FERM domain||IQ motif, EF-hand binding site||P-loop containing nucleoside triphosphate hydrolase||Pleckstrin homology domain||Band 4.1 domain	0.953667	6.73634e-05
ENSMUST00000145410.1	ENSMUSG00000085541.1	Gm16010	Annotated_lncRNA	ENSMUST00000096495	ENSMUSG00000064127	Med14	Mediator complex, subunit Med14||-	-0.957969	4.81011e-05
ENSMUST00000145410.1	ENSMUSG00000085541.1	Gm16010	Annotated_lncRNA	ENSMUST00000107302	ENSMUSG00000017801	Mlx	Myc-type, basic helix-loop-helix (bHLH) domain	-0.98442	1.53092e-06
ENSMUST00000145410.1	ENSMUSG00000085541.1	Gm16010	Annotated_lncRNA	ENSMUST00000095899	ENSMUSG00000096054	Syne1	Spectrin repeat||Actinin-type actin-binding domain, conserved site||Spectrin/alpha-actinin||Calponin homology domain||KASH domain	0.953956	6.5922e-05
ENSMUST00000145410.1	ENSMUSG00000085541.1	Gm16010	Annotated_lncRNA	ENSMUST00000159109	ENSMUSG00000040524	Zfp609	-||Zinc finger, C2H2	0.956172	5.55935e-05
ENSMUST00000145410.1	ENSMUSG00000085541.1	Gm16010	Annotated_lncRNA	ENSMUST00000206911	ENSMUSG00000006269	Atp6v1b1	ATPase, F1/V1/A1 complex, alpha/beta subunit, nucleotide-binding domain||ATPase, F1 complex alpha/beta subunit, N-terminal domain||P-loop containing nucleoside triphosphate hydrolase||-||ATPase, alpha/beta subunit, nucleotide-binding domain, active site||ATPase, F1/V1/A1 complex, alpha/beta subunit, C-terminal||ATPase, V1 complex, subunit B	0.955286	5.95745e-05
ENSMUST00000145410.1	ENSMUSG00000085541.1	Gm16010	Annotated_lncRNA	ENSMUST00000002048	ENSMUSG00000001983	Taco1	YebC-like||Transcriptional regulator TACO1-like	-0.986562	9.14106e-07
ENSMUST00000145410.1	ENSMUSG00000085541.1	Gm16010	Annotated_lncRNA	ENSMUST00000035565	ENSMUSG00000032855	Pkd1	PKD/Chitinase domain||PKD domain||Leucine-rich repeat||Carbohydrate-binding WSC||PLAT/LH2 domain||Polycystic kidney disease type 1 protein||PKD/REJ-like domain||C-type lectin fold||REJ domain||C-type lectin||Leucine-rich repeat N-terminal domain||Polycystin cation channel||Leucine-rich repeat, typical subtype||Carbohydrate-binding WSC, subgroup||Polycystin cation channel, PKD1/PKD2||GPS motif||Cy…	0.955785	5.73063e-05
ENSMUST00000145410.1	ENSMUSG00000085541.1	Gm16010	Annotated_lncRNA	ENSMUST00000041475	ENSMUSG00000048612	Myof	FerIin domain||Ferlin A-domain||Ferlin B-domain||C2 domain||Peroxin/Ferlin domain	0.953004	7.07522e-05
ENSMUST00000145410.1	ENSMUSG00000085541.1	Gm16010	Annotated_lncRNA	ENSMUST00000068545	ENSMUSG00000055137	Sugct	CoA-transferase family III domain||CoA-transferase family III	-0.974921	8.02578e-06
ENSMUST00000145410.1	ENSMUSG00000085541.1	Gm16010	Annotated_lncRNA	ENSMUST00000059515	ENSMUSG00000021218	Gdi2	Rab GDI protein||GDP dissociation inhibitor	-0.988355	5.54827e-07
ENSMUST00000145410.1	ENSMUSG00000085541.1	Gm16010	Annotated_lncRNA	ENSMUST00000030771	ENSMUSG00000029014	Dnajc2	DnaJ domain, conserved site||DnaJ domain||Myb domain||Homeodomain-like||SANT/Myb domain||SANT domain	-0.975676	7.2171e-06
ENSMUST00000145410.1	ENSMUSG00000085541.1	Gm16010	Annotated_lncRNA	ENSMUST00000067888	ENSMUSG00000029735	Tpk1	Thiamin pyrophosphokinase||Thiamin pyrophosphokinase, eukaryotic||Thiamin pyrophosphokinase, vitamin B1-binding domain||Thiamin pyrophosphokinase, catalytic domain	-0.966971	2.08766e-05
ENSMUST00000145410.1	ENSMUSG00000085541.1	Gm16010	Annotated_lncRNA	ENSMUST00000095797	ENSMUSG00000021395	Spin1	Spindlin/spermiogenesis-specific protein	0.950317	8.57222e-05
ENSMUST00000145410.1	ENSMUSG00000085541.1	Gm16010	Annotated_lncRNA	ENSMUST00000071728	ENSMUSG00000029822	Osbpl3	-||Oxysterol-binding protein, conserved site||Pleckstrin homology domain||Oxysterol-binding protein	-0.953593	6.77373e-05
ENSMUST00000145410.1	ENSMUSG00000085541.1	Gm16010	Annotated_lncRNA	ENSMUST00000106153	ENSMUSG00000036825	Ssx2ip	Afadin/alpha-actinin-binding||-	-0.956581	5.38214e-05
ENSMUST00000145410.1	ENSMUSG00000085541.1	Gm16010	Annotated_lncRNA	ENSMUST00000141158	ENSMUSG00000013033	Adgrl1	Olfactomedin-like domain||GPCR, family 2, extracellular hormone receptor domain||GPCR, family 2, secretin-like||GPCR, family 2-like||GPCR, family 2, latrophilin||GPS motif||GPCR, family 2, latrophilin, C-terminal||GPCR, family 2, secretin-like, conserved site||D-galactoside/L-rhamnose binding SUEL lectin domain	0.979398	4.05033e-06
ENSMUST00000145410.1	ENSMUSG00000085541.1	Gm16010	Annotated_lncRNA	ENSMUST00000030305	ENSMUSG00000028571	Cyp2j13	Cytochrome P450, E-class, group I, CYP2J-like||Cytochrome P450||Cytochrome P450, conserved site||Cytochrome P450, E-class, group I	-0.951313	7.99379e-05
ENSMUST00000145410.1	ENSMUSG00000085541.1	Gm16010	Annotated_lncRNA	ENSMUST00000072818	ENSMUSG00000061906	Ugt2b38	UDP-glucuronosyl/UDP-glucosyltransferase	-0.951186	8.06608e-05
ENSMUST00000145410.1	ENSMUSG00000085541.1	Gm16010	Annotated_lncRNA	ENSMUST00000028250	ENSMUSG00000026887	Mrrf	Ribosome recycling factor domain||-	-0.956548	5.39611e-05
ENSMUST00000145410.1	ENSMUSG00000085541.1	Gm16010	Annotated_lncRNA	ENSMUST00000191104	ENSMUSG00000055322	Tns1	Tensin phosphotyrosine-binding domain||C2 domain||Protein-tyrosine phosphatase, catalytic||-||Protein-tyrosine phosphatase-like||PTB/PI domain||Tensin phosphatase, lipid phosphatase domain||SH2 domain||Protein kinase C-like, phorbol ester/diacylglycerol-binding domain||Tensin phosphatase, C2 domain	0.953743	6.69806e-05
ENSMUST00000145410.1	ENSMUSG00000085541.1	Gm16010	Annotated_lncRNA	ENSMUST00000023707	ENSMUSG00000022982	Sod1	Superoxide dismutase, copper/zinc binding domain||Superoxide dismutase, copper/zinc, binding site	-0.960825	3.77054e-05
ENSMUST00000145410.1	ENSMUSG00000085541.1	Gm16010	Annotated_lncRNA	ENSMUST00000123082	ENSMUSG00000060771	Tsga10	-	-0.960492	3.88272e-05
ENSMUST00000145410.1	ENSMUSG00000085541.1	Gm16010	Annotated_lncRNA	ENSMUST00000032413	ENSMUSG00000030275	Etnk1	Protein kinase-like domain	0.968461	1.7787e-05
ENSMUST00000145410.1	ENSMUSG00000085541.1	Gm16010	Annotated_lncRNA	ENSMUST00000097973	ENSMUSG00000028571	Cyp2j13	Cytochrome P450, E-class, group I, CYP2J-like||Cytochrome P450||Cytochrome P450, conserved site||Cytochrome P450, E-class, group I	-0.962371	3.27996e-05
ENSMUST00000145410.1	ENSMUSG00000085541.1	Gm16010	Annotated_lncRNA	ENSMUST00000025598	ENSMUSG00000024694	Keg1	Glycine N-acyltransferase, C-terminal||Acyl-CoA N-acyltransferase||Glycine N-acyltransferase, N-terminal	-0.951906	7.66238e-05
ENSMUST00000145410.1	ENSMUSG00000085541.1	Gm16010	Annotated_lncRNA	ENSMUST00000068813	ENSMUSG00000055312	Them7	Thioesterase superfamily||HotDog domain	-0.962559	3.22368e-05
ENSMUST00000145410.1	ENSMUSG00000085541.1	Gm16010	Annotated_lncRNA	ENSMUST00000047929	ENSMUSG00000033533	Acsm1	AMP-dependent synthetase/ligase||AMP-binding, conserved site||AMP-binding enzyme C-terminal domain	-0.957518	4.99104e-05
ENSMUST00000145410.1	ENSMUSG00000085541.1	Gm16010	Annotated_lncRNA	ENSMUST00000168665	ENSMUSG00000032403	2300009A05Rik	Protein of unknown function DUF4528	-0.964669	2.63673e-05
ENSMUST00000145410.1	ENSMUSG00000085541.1	Gm16010	Annotated_lncRNA	ENSMUST00000115443	ENSMUSG00000009376	Met	Protein kinase-like domain||-||Plexin repeat||Protein kinase, ATP binding site||Sema domain||Plexin-like fold||IPT domain||Immunoglobulin E-set||Tyrosine-protein kinase, HGF/MSP receptor||Tyrosine-protein kinase, catalytic domain||Serine-threonine/tyrosine-protein kinase catalytic domain||Tyrosine-protein kinase, active site||Protein kinase domain	-0.965449	2.4404e-05
ENSMUST00000145410.1	ENSMUSG00000085541.1	Gm16010	Annotated_lncRNA	ENSMUST00000176030	ENSMUSG00000024921	Smarca2	Bromodomain||Glutamine-Leucine-Glutamine, QLQ||Bromodomain, conserved site||Helicase, C-terminal||Snf2 ATP coupling domain||P-loop containing nucleoside triphosphate hydrolase||Helicase superfamily 1/2, ATP-binding domain||Helicase/SANT-associated domain||BRK domain||SNF2-related, N-terminal domain||-	-0.957554	4.97613e-05
ENSMUST00000145410.1	ENSMUSG00000085541.1	Gm16010	Annotated_lncRNA	ENSMUST00000117597	ENSMUSG00000001786	Fbxo7	-||F-box domain||PI31 proteasome regulator, N-terminal||Ubiquitin-related domain	-0.961894	3.42622e-05
ENSMUST00000145410.1	ENSMUSG00000085541.1	Gm16010	Annotated_lncRNA	ENSMUST00000022169	ENSMUSG00000021665	Hexb	Glycoside hydrolase family 20, catalytic domain||Chitobiase/beta-hexosaminidase domain 2-like||Glycoside hydrolase superfamily||Beta-hexosaminidase, eukaryotic type, N-terminal||Beta-hexosaminidase	-0.96629	2.24062e-05
ENSMUST00000145410.1	ENSMUSG00000085541.1	Gm16010	Annotated_lncRNA	ENSMUST00000036031	ENSMUSG00000039934	Gsap	Gamma-secretase-activating protein, C-terminal domain||-	-0.981992	2.53558e-06
ENSMUST00000145410.1	ENSMUSG00000085541.1	Gm16010	Annotated_lncRNA	ENSMUST00000036236	ENSMUSG00000038388	Mpp6	L27 domain||SH3 domain||Guanylate kinase, conserved site||P-loop containing nucleoside triphosphate hydrolase||PDZ domain||L27 domain, C-terminal||Guanylate kinase/L-type calcium channel beta subunit||Variant SH3 domain||Guanylate kinase-like domain	-0.959363	4.2803e-05
ENSMUST00000145410.1	ENSMUSG00000085541.1	Gm16010	Annotated_lncRNA	ENSMUST00000030769	ENSMUSG00000028932	Psmc2	ATPase, AAA-type, conserved site||P-loop containing nucleoside triphosphate hydrolase||AAA+ ATPase domain||26S proteasome subunit P45||ATPase, AAA-type, core	-0.953032	7.06052e-05
ENSMUST00000145410.1	ENSMUSG00000085541.1	Gm16010	Annotated_lncRNA	ENSMUST00000022368	ENSMUSG00000021822	Plau	Kringle||Peptidase S1A, chymotrypsin-type||Peptidase S1, PA clan||Peptidase S1, trypsin family, active site||Kringle, conserved site||EGF-like, conserved site||EGF-like domain||Serine proteases, trypsin domain||Kringle-like fold	-0.950196	8.64446e-05
ENSMUST00000145410.1	ENSMUSG00000085541.1	Gm16010	Annotated_lncRNA	ENSMUST00000066279	ENSMUSG00000036206	Sh3bp4	Variant SH3 domain||ZU5 domain||SH3 domain	0.950137	8.6797e-05
ENSMUST00000145410.1	ENSMUSG00000085541.1	Gm16010	Annotated_lncRNA	ENSMUST00000107868	ENSMUSG00000020541	Tom1l1	GAT domain||ENTH/VHS||VHS subgroup||Target of Myb protein 1||VHS domain	-0.961242	3.63356e-05
ENSMUST00000145410.1	ENSMUSG00000085541.1	Gm16010	Annotated_lncRNA	ENSMUST00000060212	ENSMUSG00000019810	Fuca2	Glycoside hydrolase, family 29, conserved site||Glycoside hydrolase, family 29||-||Alpha-L-fucosidase, metazoa-type||Glycoside hydrolase superfamily	-0.975081	7.84931e-06
ENSMUST00000145410.1	ENSMUSG00000085541.1	Gm16010	Annotated_lncRNA	ENSMUST00000142742	ENSMUSG00000029361	Nos1	Nitric oxide synthase, N-terminal||Oxidoreductase FAD/NAD(P)-binding||Flavoprotein pyridine nucleotide cytochrome reductase||Flavoprotein-like||Flavodoxin/nitric oxide synthase||PDZ domain||Nitric-oxide synthase, eukaryote||FAD-binding, type 1||Riboflavin synthase-like beta-barrel||Ferredoxin reductase-type FAD-binding domain||Flavodoxin	0.964969	2.55985e-05
ENSMUST00000145410.1	ENSMUSG00000085541.1	Gm16010	Annotated_lncRNA	ENSMUST00000110698	ENSMUSG00000055737	Ghr	Growth hormone/erythropoietin receptor, ligand binding||Growth hormone-binding protein||Fibronectin type III||Long hematopoietin receptor, single chain, conserved site	-0.970208	1.45955e-05
ENSMUST00000145410.1	ENSMUSG00000085541.1	Gm16010	Annotated_lncRNA	ENSMUST00000124830	ENSMUSG00000054889	Dsp	Plectin repeat||Spectrin/alpha-actinin	0.956538	5.40056e-05
ENSMUST00000145410.1	ENSMUSG00000085541.1	Gm16010	Annotated_lncRNA	ENSMUST00000020255	ENSMUSG00000020062	Slc5a8	Sodium/solute symporter||Sodium/solute symporter, subgroup	-0.954905	6.13476e-05
ENSMUST00000145410.1	ENSMUSG00000085541.1	Gm16010	Annotated_lncRNA	ENSMUST00000020258	ENSMUSG00000020064	Herc4	HECT domain||Regulator of chromosome condensation 1/beta-lactamase-inhibitor protein II||Regulator of chromosome condensation, RCC1	-0.968914	1.69167e-05
ENSMUST00000145410.1	ENSMUSG00000085541.1	Gm16010	Annotated_lncRNA	ENSMUST00000004232	ENSMUSG00000074207	Adh1	Alcohol dehydrogenase, C-terminal||Alcohol dehydrogenase, N-terminal||Alcohol dehydrogenase, zinc-type, conserved site||GroES-like||Polyketide synthase, enoylreductase domain||-	-0.954553	6.30147e-05
ENSMUST00000145410.1	ENSMUSG00000085541.1	Gm16010	Annotated_lncRNA	ENSMUST00000029419	ENSMUSG00000027831	Veph1	Pleckstrin homology domain||Armadillo-type fold	-0.97589	6.998e-06
ENSMUST00000145410.1	ENSMUSG00000085541.1	Gm16010	Annotated_lncRNA	ENSMUST00000032429	ENSMUSG00000030291	Med21	Mediator complex, subunit Med21	-0.95905	4.39534e-05
ENSMUST00000145410.1	ENSMUSG00000085541.1	Gm16010	Annotated_lncRNA	ENSMUST00000026552	ENSMUSG00000025479	Cyp2e1	Cytochrome P450, conserved site||Cytochrome P450||Cytochrome P450, E-class, group I, CYP2E-like||Cytochrome P450, E-class, group I	-0.983335	1.93546e-06
ENSMUST00000145410.1	ENSMUSG00000085541.1	Gm16010	Annotated_lncRNA	ENSMUST00000042251	ENSMUSG00000019763	Rmnd1	-||Protein of unknown function DUF155	-0.958896	4.45298e-05
ENSMUST00000145410.1	ENSMUSG00000085541.1	Gm16010	Annotated_lncRNA	ENSMUST00000107021	ENSMUSG00000063730	Hsd3b2	3-beta hydroxysteroid dehydrogenase/isomerase	-0.954468	6.34256e-05
ENSMUST00000145410.1	ENSMUSG00000085541.1	Gm16010	Annotated_lncRNA	ENSMUST00000198631	ENSMUSG00000029484	Anxa3	Annexin repeat||-||Annexin repeat, conserved site||Annexin, type III||Annexin	0.950959	8.19629e-05
ENSMUST00000145410.1	ENSMUSG00000085541.1	Gm16010	Annotated_lncRNA	ENSMUST00000145634	ENSMUSG00000025421	Hdhd2	Yos1-like||HAD-like domain||HAD-superfamily hydrolase, subfamily IIA, hypothetical 2||HAD-superfamily hydrolase, subfamily IIA	-0.977268	5.70378e-06
ENSMUST00000145410.1	ENSMUSG00000085541.1	Gm16010	Annotated_lncRNA	ENSMUST00000034524	ENSMUSG00000032026	Rexo2	Ribonuclease H-like domain||Exonuclease, RNase T/DNA polymerase III	-0.955921	5.67029e-05
ENSMUST00000145410.1	ENSMUSG00000085541.1	Gm16010	Annotated_lncRNA	ENSMUST00000081747	ENSMUSG00000060512	0610040J01Rik	-	0.969276	1.62435e-05
ENSMUST00000145410.1	ENSMUSG00000085541.1	Gm16010	Annotated_lncRNA	ENSMUST00000147251	ENSMUSG00000068740	Celsr2	GPCR, family 2-like||Cadherin||GPS motif||Laminin EGF domain||EGF-like, conserved site||Laminin G domain||Cadherin-like||EGF-type aspartate/asparagine hydroxylation site||EGF-like calcium-binding domain||GPCR, family 2, secretin-like||EGF-like domain||Concanavalin A-like lectin/glucanase domain||GPCR, family 2, extracellular hormone receptor domain||Cadherin conserved site	0.960513	3.87552e-05
ENSMUST00000145410.1	ENSMUSG00000085541.1	Gm16010	Annotated_lncRNA	ENSMUST00000058488	ENSMUSG00000032353	Tmed3	GOLD domain	-0.953843	6.64818e-05
ENSMUST00000145410.1	ENSMUSG00000085541.1	Gm16010	Annotated_lncRNA	ENSMUST00000063814	ENSMUSG00000052102	Gnpda1	Glucosamine/galactosamine-6-phosphate isomerase||Glucosamine-6-phosphate isomerase||Glucosamine-6-phosphate isomerase, conserved site	-0.952356	7.41776e-05
ENSMUST00000145410.1	ENSMUSG00000085541.1	Gm16010	Annotated_lncRNA	ENSMUST00000061295	ENSMUSG00000038009	Dnajc22	DnaJ domain||TM2 domain	-0.958578	4.57338e-05
ENSMUST00000145410.1	ENSMUSG00000085541.1	Gm16010	Annotated_lncRNA	ENSMUST00000163083	ENSMUSG00000024646	Cyb5a	Cytochrome b5, heme-binding site||Cytochrome b5-like heme/steroid binding domain	-0.954157	6.49335e-05
ENSMUST00000145410.1	ENSMUSG00000085541.1	Gm16010	Annotated_lncRNA	ENSMUST00000020885	ENSMUSG00000020570	Sypl	Synaptophysin/synaptoporin||Marvel domain	-0.950671	8.36309e-05
ENSMUST00000145410.1	ENSMUSG00000085541.1	Gm16010	Annotated_lncRNA	ENSMUST00000031103	ENSMUSG00000029201	Ugdh	6-phosphogluconate dehydrogenase C-terminal domain-like||UDP-glucose/GDP-mannose dehydrogenase, C-terminal||UDP-glucose/GDP-mannose dehydrogenase||UDP-glucose/GDP-mannose dehydrogenase, N-terminal||UDP-glucose 6-dehydrogenase, eukaryotic type||UDP-glucose/GDP-mannose dehydrogenase, dimerisation	-0.959457	4.24616e-05
ENSMUST00000145410.1	ENSMUSG00000085541.1	Gm16010	Annotated_lncRNA	ENSMUST00000142701	ENSMUSG00000029458	Brap	-||Zinc finger, RING-type||BRCA1-associated 2||Zinc finger, UBP-type	-0.956125	5.57995e-05
ENSMUST00000145410.1	ENSMUSG00000085541.1	Gm16010	Annotated_lncRNA	ENSMUST00000028332	ENSMUSG00000026958	Dpp7	Peptidase S28||Alpha/Beta hydrolase fold	-0.957144	5.14442e-05
ENSMUST00000145410.1	ENSMUSG00000085541.1	Gm16010	Annotated_lncRNA	ENSMUST00000071430	ENSMUSG00000062619	2310039H08Rik	-	-0.951885	7.67432e-05
ENSMUST00000145410.1	ENSMUSG00000085541.1	Gm16010	Annotated_lncRNA	ENSMUST00000069330	ENSMUSG00000001348	Acp5	Acid phosphatase, type 5||Metallo-dependent phosphatase-like||Calcineurin-like phosphoesterase domain, apaH type	-0.954382	6.38415e-05
ENSMUST00000145410.1	ENSMUSG00000085541.1	Gm16010	Annotated_lncRNA	ENSMUST00000061937	ENSMUSG00000028189	Ctbs	Glycoside hydrolase family 18, catalytic domain||Glycoside hydrolase, chitinase active site||Glycoside hydrolase superfamily||-||Chitinase II	-0.955964	5.65088e-05
ENSMUST00000145410.1	ENSMUSG00000085541.1	Gm16010	Annotated_lncRNA	ENSMUST00000074127	ENSMUSG00000010025	Aldh3a2	Aldehyde dehydrogenase NAD(P)-dependent||Aldehyde dehydrogenase domain||Aldehyde/histidinol dehydrogenase||Aldehyde dehydrogenase, cysteine active site||Aldehyde dehydrogenase, glutamic acid active site	-0.951756	7.74548e-05
ENSMUST00000145410.1	ENSMUSG00000085541.1	Gm16010	Annotated_lncRNA	ENSMUST00000176425	ENSMUSG00000001418	Glmp	-||Lysosomal transcription factor, NCU-G1	-0.955643	5.79466e-05
ENSMUST00000145410.1	ENSMUSG00000085541.1	Gm16010	Annotated_lncRNA	ENSMUST00000022871	ENSMUSG00000022261	Sdc2	Syndecan, conserved site||Neurexin/syndecan/glycophorin C||Syndecan/Neurexin domain	-0.970473	1.41501e-05
ENSMUST00000145410.1	ENSMUSG00000085541.1	Gm16010	Annotated_lncRNA	ENSMUST00000101029	ENSMUSG00000037679	Inf2	Formin, FH2 domain||Formin, FH3 domain||Rho GTPase-binding/formin homology 3 (GBD/FH3) domain||WH2 domain||Formin, GTPase-binding domain||Armadillo-type fold	0.952895	7.13204e-05
ENSMUST00000145410.1	ENSMUSG00000085541.1	Gm16010	Annotated_lncRNA	ENSMUST00000033839	ENSMUSG00000031458	Coprs	Coordinator of PRMT5 and differentiation stimulator	-0.955387	5.91085e-05
ENSMUST00000145410.1	ENSMUSG00000085541.1	Gm16010	Annotated_lncRNA	ENSMUST00000049257	ENSMUSG00000020677	Ddx52	DEAD/DEAH box helicase domain||Helicase superfamily 1/2, ATP-binding domain||Helicase, C-terminal||P-loop containing nucleoside triphosphate hydrolase||RNA helicase, DEAD-box type, Q motif	-0.982761	2.17801e-06
ENSMUST00000145410.1	ENSMUSG00000085541.1	Gm16010	Annotated_lncRNA	ENSMUST00000031093	ENSMUSG00000029193	Cckar	G protein-coupled receptor, rhodopsin-like||Cholecystokinin A receptor, N-terminal||GPCR, rhodopsin-like, 7TM||Cholecystokinin receptor type A||Cholecystokinin receptor||Gastrin receptor	-0.962374	3.27913e-05
ENSMUST00000145410.1	ENSMUSG00000085541.1	Gm16010	Annotated_lncRNA	ENSMUST00000051594	ENSMUSG00000021697	Depdc1b	Rho GTPase-activating protein domain||Rho GTPase activation protein||DEP domain	-0.971287	1.28425e-05
ENSMUST00000145410.1	ENSMUSG00000085541.1	Gm16010	Annotated_lncRNA	ENSMUST00000046743	ENSMUSG00000033488	BC026585	Alcohol dehydrogenase, C-terminal||Polyketide synthase, enoylreductase domain||-||Alcohol dehydrogenase, N-terminal||GroES-like	-0.966574	2.17577e-05
ENSMUST00000145410.1	ENSMUSG00000085541.1	Gm16010	Annotated_lncRNA	ENSMUST00000103108	ENSMUSG00000035112	Wnk4	Protein kinase-like domain||-||Serine/threonine/dual specificity protein kinase, catalytic domain||Serine/threonine-protein kinase, active site||Protein kinase domain||Serine/threonine-protein kinase OSR1/WNK, CCT domain	0.950164	8.66369e-05
ENSMUST00000145410.1	ENSMUSG00000085541.1	Gm16010	Annotated_lncRNA	ENSMUST00000002655	ENSMUSG00000002580	Mien1	Selenoprotein, Rdx type||Thioredoxin-like fold	-0.96479	2.60553e-05
ENSMUST00000145410.1	ENSMUSG00000085541.1	Gm16010	Annotated_lncRNA	ENSMUST00000144177	ENSMUSG00000025911	Adhfe1	-||Alcohol dehydrogenase, iron-type	-0.989946	3.32225e-07
ENSMUST00000145410.1	ENSMUSG00000085541.1	Gm16010	Annotated_lncRNA	ENSMUST00000035890	ENSMUSG00000041052	Slc7a13	Amino acid/polyamine transporter I	-0.961877	3.43142e-05
ENSMUST00000145410.1	ENSMUSG00000085541.1	Gm16010	Annotated_lncRNA	ENSMUST00000119612	ENSMUSG00000025903	Lypla1	Alpha/Beta hydrolase fold||Phospholipase/carboxylesterase/thioesterase	-0.987468	7.16648e-07
ENSMUST00000145410.1	ENSMUSG00000085541.1	Gm16010	Annotated_lncRNA	ENSMUST00000040218	ENSMUSG00000038206	Fbxo8	Sec7 domain||F-box domain	-0.962235	3.32127e-05
ENSMUST00000145410.1	ENSMUSG00000085541.1	Gm16010	Annotated_lncRNA	ENSMUST00000127380	ENSMUSG00000079334	Nat6	Acyl-CoA N-acyltransferase||GNAT domain	-0.960814	3.77433e-05
ENSMUST00000145410.1	ENSMUSG00000085541.1	Gm16010	Annotated_lncRNA	ENSMUST00000031793	ENSMUSG00000029780	Nt5c3	Pyrimidine 5'-nucleotidase, eukaryotic||HAD-like domain||HAD-superfamily hydrolase, subfamily IB, PSPase-like||-	-0.953965	6.58777e-05
ENSMUST00000145410.1	ENSMUSG00000085541.1	Gm16010	Annotated_lncRNA	ENSMUST00000090398	ENSMUSG00000021782	Dlg5	Domain of unknown function DUF622||Guanylate kinase-like domain||Guanylate kinase/L-type calcium channel beta subunit||CARD domain||P-loop containing nucleoside triphosphate hydrolase||Death-like domain||PDZ domain||SH3 domain	0.960109	4.01469e-05
ENSMUST00000145410.1	ENSMUSG00000085541.1	Gm16010	Annotated_lncRNA	ENSMUST00000034552	ENSMUSG00000032051	Fdx1	Adrenodoxin||2Fe-2S ferredoxin-type iron-sulfur binding domain||Adrenodoxin, iron-sulphur binding site	-0.973849	9.28262e-06
ENSMUST00000145410.1	ENSMUSG00000085541.1	Gm16010	Annotated_lncRNA	ENSMUST00000030914	ENSMUSG00000029048	Rer1	Retrieval of early ER protein Rer1	-0.972552	1.09822e-05
ENSMUST00000145410.1	ENSMUSG00000085541.1	Gm16010	Annotated_lncRNA	ENSMUST00000170372	ENSMUSG00000035112	Wnk4	Protein kinase-like domain||-||Serine/threonine/dual specificity protein kinase, catalytic domain||Serine/threonine-protein kinase, active site||Protein kinase domain||Serine/threonine-protein kinase OSR1/WNK, CCT domain	0.956109	5.5869e-05
ENSMUST00000145410.1	ENSMUSG00000085541.1	Gm16010	Annotated_lncRNA	ENSMUST00000027381	ENSMUSG00000026189	Pecr	-||Glucose/ribitol dehydrogenase||Short-chain dehydrogenase/reductase SDR	-0.951302	7.99995e-05
ENSMUST00000145410.1	ENSMUSG00000085541.1	Gm16010	Annotated_lncRNA	ENSMUST00000076354	ENSMUSG00000058254	Tspan7	Tetraspanin, conserved site||Tetraspanin||Tetraspanin/Peripherin	0.979126	4.23951e-06
ENSMUST00000145410.1	ENSMUSG00000085541.1	Gm16010	Annotated_lncRNA	ENSMUST00000149405	ENSMUSG00000052712	BC004004	-	-0.978848	4.43894e-06
ENSMUST00000145410.1	ENSMUSG00000085541.1	Gm16010	Annotated_lncRNA	ENSMUST00000046122	ENSMUSG00000039682	Lap3	Peptidase M17, leucyl aminopeptidase, C-terminal||Leucine aminopeptidase/peptidase B||-||Peptidase M17, leucyl aminopeptidase, N-terminal	-0.953412	6.86522e-05
ENSMUST00000145410.1	ENSMUSG00000085541.1	Gm16010	Annotated_lncRNA	ENSMUST00000031978	ENSMUSG00000029918	Mrps33	Ribosomal protein S27/S33, mitochondrial	-0.974216	8.83744e-06
ENSMUST00000145410.1	ENSMUSG00000085541.1	Gm16010	Annotated_lncRNA	ENSMUST00000022296	ENSMUSG00000021774	Ube2e1	Ubiquitin-conjugating enzyme, active site||Ubiquitin-conjugating enzyme E2||Ubiquitin-conjugating enzyme/RWD-like	-0.960134	4.00568e-05
ENSMUST00000145410.1	ENSMUSG00000085541.1	Gm16010	Annotated_lncRNA	ENSMUST00000020488	ENSMUSG00000020255	D10Wsu102e	Protein of unknown function DUF4598	-0.966635	2.16222e-05
ENSMUST00000145410.1	ENSMUSG00000085541.1	Gm16010	Annotated_lncRNA	ENSMUST00000022281	ENSMUSG00000016018	Skiv2l2	ATP-dependent RNA helicase Ski2, C-terminal||Helicase superfamily 1/2, ATP-binding domain||DEAD/DEAH box helicase domain||rRNA-processing arch domain||ATP-dependent RNA helicase Ski2||P-loop containing nucleoside triphosphate hydrolase||Helicase, C-terminal	-0.96533	2.46982e-05
ENSMUST00000145410.1	ENSMUSG00000085541.1	Gm16010	Annotated_lncRNA	ENSMUST00000010698	ENSMUSG00000010554	Mettl16	S-adenosyl-L-methionine-dependent methyltransferase||Ribosomal RNA large subunit methyltransferase F-like||S-adenosyl-L-methionine dependent methyltransferase, Mett10D, predicted	-0.952952	7.10233e-05
ENSMUST00000145410.1	ENSMUSG00000085541.1	Gm16010	Annotated_lncRNA	ENSMUST00000182501	ENSMUSG00000021917	Spcs1	-||Microsomal signal peptidase 12kDa subunit	-0.965741	2.36979e-05
ENSMUST00000145410.1	ENSMUSG00000085541.1	Gm16010	Annotated_lncRNA	ENSMUST00000159365	ENSMUSG00000045875	Adra1a	Adrenoceptor family||Alpha 1A adrenoceptor||G protein-coupled receptor, rhodopsin-like||GPCR, rhodopsin-like, 7TM	0.962251	3.31619e-05
ENSMUST00000145410.1	ENSMUSG00000085541.1	Gm16010	Annotated_lncRNA	ENSMUST00000066439	ENSMUSG00000053799	Exoc6	Exocyst complex subunit Sec15-like	-0.950467	8.4831e-05
ENSMUST00000145410.1	ENSMUSG00000085541.1	Gm16010	Annotated_lncRNA	ENSMUST00000046959	ENSMUSG00000040966	Slc22a2	Organic cation transport protein||Major facilitator, sugar transporter-like||Sugar transporter, conserved site||Major facilitator superfamily domain	-0.95648	5.42555e-05
ENSMUST00000145410.1	ENSMUSG00000085541.1	Gm16010	Annotated_lncRNA	ENSMUST00000103032	ENSMUSG00000020782	Llgl2	WD40 repeat||-||WD40 repeat, conserved site||Lethal giant larvae homologue 2||WD40-repeat-containing domain||Lethal(2) giant larvae protein	0.954849	6.16114e-05
ENSMUST00000145410.1	ENSMUSG00000085541.1	Gm16010	Annotated_lncRNA	ENSMUST00000023509	ENSMUSG00000062901	Klhl24	Kelch repeat type 1||BTB-kelch protein||BTB/Kelch-associated||BTB/POZ domain||POZ domain	-0.965843	2.34533e-05
ENSMUST00000145410.1	ENSMUSG00000085541.1	Gm16010	Annotated_lncRNA	ENSMUST00000165602	ENSMUSG00000026463	Atp2b4	P-type ATPase, phosphorylation site||Cation-transporting P-type ATPase, C-terminal||Plasma membrane calcium transporting P-type ATPase, C-terminal||P-type ATPase, cytoplasmic domain N||P-type ATPase, subfamily IIB||HAD-like domain||Cation-transporting P-type ATPase, N-terminal||P-type ATPase||-||P-type ATPase, A domain	0.971247	1.29038e-05
ENSMUST00000145410.1	ENSMUSG00000085541.1	Gm16010	Annotated_lncRNA	ENSMUST00000078752	ENSMUSG00000060227	Casc4	GOLM1/CASC4 family||-	-0.958776	4.49816e-05
ENSMUST00000145410.1	ENSMUSG00000085541.1	Gm16010	Annotated_lncRNA	ENSMUST00000015712	ENSMUSG00000015568	Lpl	Alpha/Beta hydrolase fold||Lipase, N-terminal||Triacylglycerol lipase family||PLAT/LH2 domain||Lipase, LIPH-type||Lipoprotein lipase	-0.967167	2.04486e-05
ENSMUST00000145410.1	ENSMUSG00000085541.1	Gm16010	Annotated_lncRNA	ENSMUST00000015800	ENSMUSG00000015656	Hspa8	Heat shock protein 70, conserved site||Heat shock protein 70kD, peptide-binding domain||Heat shock protein 70 family||Heat shock protein 70kD, C-terminal domain	-0.957927	4.8268e-05
ENSMUST00000145410.1	ENSMUSG00000085541.1	Gm16010	Annotated_lncRNA	ENSMUST00000165605	ENSMUSG00000038515	Grtp1	Rab-GTPase-TBC domain	-0.95146	7.91061e-05
ENSMUST00000145410.1	ENSMUSG00000085541.1	Gm16010	Annotated_lncRNA	ENSMUST00000030986	ENSMUSG00000029103	Lrpap1	Alpha-2-macroglobulin RAP, C-terminal||Alpha-2-macroglobulin receptor-associated protein, domain 1	-0.975632	7.26207e-06
ENSMUST00000145410.1	ENSMUSG00000085541.1	Gm16010	Annotated_lncRNA	ENSMUST00000010198	ENSMUSG00000010054	Tusc2	Tumour suppressor candidate 2	-0.956141	5.57278e-05
ENSMUST00000145410.1	ENSMUSG00000085541.1	Gm16010	Annotated_lncRNA	ENSMUST00000032441	ENSMUSG00000030301	Ccdc91	-	-0.951173	8.0732e-05
ENSMUST00000145410.1	ENSMUSG00000085541.1	Gm16010	Annotated_lncRNA	ENSMUST00000034267	ENSMUSG00000031808	Slc27a1	AMP-binding enzyme C-terminal domain||AMP-binding, conserved site||AMP-dependent synthetase/ligase	0.957216	5.11464e-05
ENSMUST00000145410.1	ENSMUSG00000085541.1	Gm16010	Annotated_lncRNA	ENSMUST00000023344	ENSMUSG00000022664	Slc35a5	Nucleotide-sugar transporter||UDP/CMP-sugar transporter||-||UDP-galactose transporter	-0.962872	3.13112e-05
ENSMUST00000145410.1	ENSMUSG00000085541.1	Gm16010	Annotated_lncRNA	ENSMUST00000034547	ENSMUSG00000032047	Acat1	Thiolase, conserved site||Thiolase||Thiolase-like||Thiolase, C-terminal||Thiolase, active site||Thiolase, acyl-enzyme intermediate active site||Thiolase, N-terminal	-0.973213	1.00902e-05
ENSMUST00000145410.1	ENSMUSG00000085541.1	Gm16010	Annotated_lncRNA	ENSMUST00000043531	ENSMUSG00000038604	Fam65a	Armadillo-type fold	0.95645	5.43811e-05
ENSMUST00000145410.1	ENSMUSG00000085541.1	Gm16010	Annotated_lncRNA	ENSMUST00000145928	ENSMUSG00000006345	Ggt1	Nucleophile aminohydrolases, N-terminal||Gamma-glutamyltranspeptidase||-	-0.96871	1.73053e-05
ENSMUST00000145410.1	ENSMUSG00000085541.1	Gm16010	Annotated_lncRNA	ENSMUST00000066330	ENSMUSG00000005417	Mprip	Pleckstrin homology domain||-	0.961642	3.50542e-05
ENSMUST00000145410.1	ENSMUSG00000085541.1	Gm16010	Annotated_lncRNA	ENSMUST00000114091	ENSMUSG00000031402	Mpp1	PDZ domain||Guanylate kinase, conserved site||P-loop containing nucleoside triphosphate hydrolase||SH3 domain||Guanylate kinase-like domain||-||Variant SH3 domain||Guanylate kinase/L-type calcium channel beta subunit	-0.957163	5.13662e-05
ENSMUST00000145410.1	ENSMUSG00000085541.1	Gm16010	Annotated_lncRNA	ENSMUST00000149579	ENSMUSG00000039219	Arid4b	RNA binding activity-knot of a chromodomain||RBB1NT||Tudor domain||Chromo domain-like||ARID DNA-binding domain	0.96321	3.03364e-05
ENSMUST00000145410.1	ENSMUSG00000085541.1	Gm16010	Annotated_lncRNA	ENSMUST00000110064	ENSMUSG00000068205	Macrod2	Macro domain||-	-0.965094	2.52856e-05
ENSMUST00000145410.1	ENSMUSG00000085541.1	Gm16010	Annotated_lncRNA	ENSMUST00000061491	ENSMUSG00000027359	Slc27a2	AMP-binding, conserved site||AMP-binding enzyme C-terminal domain||AMP-dependent synthetase/ligase	-0.960369	3.92469e-05
ENSMUST00000145410.1	ENSMUSG00000085541.1	Gm16010	Annotated_lncRNA	ENSMUST00000161401	ENSMUSG00000063694	Cycs	Cytochrome c-like domain||Cytochrome c, class IA/ IB	-0.953394	6.87458e-05
ENSMUST00000145410.1	ENSMUSG00000085541.1	Gm16010	Annotated_lncRNA	ENSMUST00000028769	ENSMUSG00000027303	Ptpra	Protein-tyrosine phosphatase, active site||Receptor tyrosine-protein phosphatase alpha||Tyrosine specific protein phosphatases domain||Receptor tyrosine-protein phosphatase, alpha/epsilon-type||PTP type protein phosphatase||Protein-tyrosine phosphatase-like||Protein-tyrosine phosphatase, catalytic	-0.971166	1.30304e-05
ENSMUST00000145410.1	ENSMUSG00000085541.1	Gm16010	Annotated_lncRNA	ENSMUST00000010049	ENSMUSG00000009905	Kdsr	Short-chain dehydrogenase/reductase, conserved site||Glucose/ribitol dehydrogenase||Short-chain dehydrogenase/reductase SDR	-0.958279	4.68836e-05
ENSMUST00000145410.1	ENSMUSG00000085541.1	Gm16010	Annotated_lncRNA	ENSMUST00000124947	ENSMUSG00000022679	Mpv17l	Mpv17/PMP22||-	-0.96472	2.62362e-05
ENSMUST00000145410.1	ENSMUSG00000085541.1	Gm16010	Annotated_lncRNA	ENSMUST00000102598	ENSMUSG00000057236	Rbbp4	WD40 repeat||Histone-binding protein RBBP4, N-terminal||G-protein beta WD-40 repeat||WD40 repeat, conserved site||WD40-repeat-containing domain	-0.952549	7.31458e-05
ENSMUST00000145410.1	ENSMUSG00000085541.1	Gm16010	Annotated_lncRNA	ENSMUST00000174143	ENSMUSG00000079495	Gm11128	GNAT domain||Acyl-CoA N-acyltransferase	-0.959112	4.3725e-05
ENSMUST00000145410.1	ENSMUSG00000085541.1	Gm16010	Annotated_lncRNA	ENSMUST00000065634	ENSMUSG00000053303	Slc22a26	Major facilitator superfamily domain||Major facilitator, sugar transporter-like	-0.956941	5.22925e-05
ENSMUST00000145410.1	ENSMUSG00000085541.1	Gm16010	Annotated_lncRNA	ENSMUST00000063042	ENSMUSG00000045594	Glb1	Glycoside hydrolase, family 35, conserved site||Beta-galactosidase 1-like||Glycoside hydrolase, family 35||Galactose-binding domain-like||Glycoside hydrolase 35, catalytic domain||Glycoside hydrolase superfamily	-0.955917	5.672e-05
ENSMUST00000145410.1	ENSMUSG00000085541.1	Gm16010	Annotated_lncRNA	ENSMUST00000000291	ENSMUSG00000000282	Mnt	Myc-type, basic helix-loop-helix (bHLH) domain	0.96677	2.1319e-05
ENSMUST00000145410.1	ENSMUSG00000085541.1	Gm16010	Annotated_lncRNA	ENSMUST00000034945	ENSMUSG00000032381	Fam96a	Domain of unknown function DUF59	-0.95491	6.13242e-05
ENSMUST00000145410.1	ENSMUSG00000085541.1	Gm16010	Annotated_lncRNA	ENSMUST00000077196	ENSMUSG00000037185	Krt80	Keratin, type II||Intermediate filament protein	0.987841	6.44973e-07
ENSMUST00000145410.1	ENSMUSG00000085541.1	Gm16010	Annotated_lncRNA	ENSMUST00000027629	ENSMUSG00000026380	Tfcp2l1	Sterile alpha motif/pointed domain||CP2 transcription factor	0.957326	5.06921e-05
ENSMUST00000145410.1	ENSMUSG00000085541.1	Gm16010	Annotated_lncRNA	ENSMUST00000034866	ENSMUSG00000032314	Etfa	Electron transfer flavoprotein, alpha subunit, C-terminal, conserved site||Electron transfer flavoprotein, alpha subunit||Electron transfer flavoprotein, alpha subunit, C-terminal||DHS-like NAD/FAD-binding domain||Electron transfer flavoprotein, alpha/beta-subunit, N-terminal	-0.956157	5.56596e-05
ENSMUST00000145410.1	ENSMUSG00000085541.1	Gm16010	Annotated_lncRNA	ENSMUST00000000594	ENSMUSG00000000581	C1d	Sas10/Utp3/C1D	-0.952031	7.59416e-05
ENSMUST00000145410.1	ENSMUSG00000085541.1	Gm16010	Annotated_lncRNA	ENSMUST00000179685	ENSMUSG00000096546	Smlr1	-	-0.95274	7.21337e-05
ENSMUST00000145410.1	ENSMUSG00000085541.1	Gm16010	Annotated_lncRNA	ENSMUST00000027265	ENSMUSG00000026096	Osgepl1	-||Gcp-like domain||Kae1/TsaD family	-0.952516	7.33202e-05
ENSMUST00000145410.1	ENSMUSG00000085541.1	Gm16010	Annotated_lncRNA	ENSMUST00000022543	ENSMUSG00000021973	Micu2	EF-hand domain	-0.955024	6.07911e-05
ENSMUST00000145410.1	ENSMUSG00000085541.1	Gm16010	Annotated_lncRNA	ENSMUST00000015645	ENSMUSG00000015501	Hivep2	Zinc finger, C2H2-like||Zinc finger, C2H2	0.958308	4.67715e-05
ENSMUST00000145410.1	ENSMUSG00000085541.1	Gm16010	Annotated_lncRNA	ENSMUST00000108246	ENSMUSG00000041058	Wwp1	WW domain||E3 ubiquitin-protein ligase, SMURF1 type||C2 domain||HECT domain	-0.96699	2.08349e-05
ENSMUST00000145410.1	ENSMUSG00000085541.1	Gm16010	Annotated_lncRNA	ENSMUST00000088086	ENSMUSG00000006800	Sulf2	Sulfatase, conserved site||Sulfatase||Alkaline-phosphatase-like, core domain||Extracellular sulfatase, C-terminal||Extracellular sulfatase	0.958038	4.78278e-05
ENSMUST00000145410.1	ENSMUSG00000085541.1	Gm16010	Annotated_lncRNA	ENSMUST00000118768	ENSMUSG00000024070	Prkd3	Pleckstrin homology domain||Serine/threonine/dual specificity protein kinase, catalytic domain||Protein kinase domain||Protein kinase-like domain||Protein kinase, ATP binding site||Protein kinase C mu-related||Protein kinase C-like, phorbol ester/diacylglycerol-binding domain||Serine/threonine-protein kinase, active site||Diacylglycerol/phorbol-ester binding	-0.958687	4.53189e-05
ENSMUST00000145410.1	ENSMUSG00000085541.1	Gm16010	Annotated_lncRNA	ENSMUST00000169729	ENSMUSG00000023942	Slc29a1	Equilibrative nucleoside transporter||-||Major facilitator superfamily domain	0.959454	4.24732e-05
ENSMUST00000145410.1	ENSMUSG00000085541.1	Gm16010	Annotated_lncRNA	ENSMUST00000034466	ENSMUSG00000031985	Gnpat	Phospholipid/glycerol acyltransferase||Dihydroxyacetone phosphate acyltransferase||Glycerol-3-phosphate O-acyltransferase/Dihydroxyacetone phosphate acyltransferase	-0.952664	7.25367e-05
ENSMUST00000145410.1	ENSMUSG00000085541.1	Gm16010	Annotated_lncRNA	ENSMUST00000049470	ENSMUSG00000042305	Tmem183a	F-box domain||-	-0.96193	3.4151e-05
ENSMUST00000145410.1	ENSMUSG00000085541.1	Gm16010	Annotated_lncRNA	ENSMUST00000032865	ENSMUSG00000030630	Fah	Fumarylacetoacetase, C-terminal-related||Fumarylacetoacetase, N-terminal||Fumarylacetoacetase	-0.950013	8.75494e-05
ENSMUST00000145410.1	ENSMUSG00000085541.1	Gm16010	Annotated_lncRNA	ENSMUST00000021691	ENSMUSG00000021263	Degs2	Sphingolipid delta4-desaturase, N-terminal||Sphingolipid delta4-desaturase||Fatty acid desaturase domain	-0.959208	4.33724e-05
ENSMUST00000145410.1	ENSMUSG00000085541.1	Gm16010	Annotated_lncRNA	ENSMUST00000072576	ENSMUSG00000014504	Srp19	Signal recognition particle, SRP19 subunit	-0.965464	2.43684e-05
ENSMUST00000145410.1	ENSMUSG00000085541.1	Gm16010	Annotated_lncRNA	ENSMUST00000044415	ENSMUSG00000039263	Npepl1	Leucine aminopeptidase/peptidase B||Peptidase M17, leucyl aminopeptidase, C-terminal	-0.95546	5.87758e-05
ENSMUST00000145410.1	ENSMUSG00000085541.1	Gm16010	Annotated_lncRNA	ENSMUST00000145841	ENSMUSG00000028713	Cyp4b1	Cytochrome P450, E-class, group I||Cytochrome P450, conserved site||Cytochrome P450||Cytochrome P450, E-class, group II	-0.962858	3.13515e-05
ENSMUST00000145410.1	ENSMUSG00000085541.1	Gm16010	Annotated_lncRNA	ENSMUST00000034140	ENSMUSG00000031703	Itfg1	-	-0.957942	4.82072e-05
ENSMUST00000145410.1	ENSMUSG00000085541.1	Gm16010	Annotated_lncRNA	ENSMUST00000203168	ENSMUSG00000032758	Kap	Kidney androgen-regulated protein	-0.950651	8.37497e-05
ENSMUST00000145410.1	ENSMUSG00000085541.1	Gm16010	Annotated_lncRNA	ENSMUST00000119103	ENSMUSG00000032066	Bco2	Carotenoid oxygenase	-0.950579	8.41759e-05
ENSMUST00000145410.1	ENSMUSG00000085541.1	Gm16010	Annotated_lncRNA	ENSMUST00000068505	ENSMUSG00000026509	Capn2	Peptidase C2, calpain family||Peptidase C2, calpain, large subunit, domain III||Peptidase C2, calpain, domain III||Peptidase C2, calpain, catalytic domain||EF-hand domain||Cysteine peptidase, cysteine active site||EF-Hand 1, calcium-binding site	0.953146	7.0016e-05
ENSMUST00000145410.1	ENSMUSG00000085541.1	Gm16010	Annotated_lncRNA	ENSMUST00000047978	ENSMUSG00000042229	Rabif	Mss4||Mss4-like	-0.957549	4.97841e-05
ENSMUST00000145410.1	ENSMUSG00000085541.1	Gm16010	Annotated_lncRNA	ENSMUST00000035390	ENSMUSG00000037053	Azgp1	-||MHC classes I/II-like antigen recognition protein||MHC class I alpha chain||Immunoglobulin-like domain||Immunoglobulin C1-set||MHC class I alpha chain, alpha1 alpha2 domains	-0.96466	2.63909e-05
ENSMUST00000145410.1	ENSMUSG00000085541.1	Gm16010	Annotated_lncRNA	ENSMUST00000043551	ENSMUSG00000040351	Ankib1	Ubiquitin interacting motif||IBR domain||Zinc finger, RING-type||Ankyrin repeat-containing domain||Ankyrin repeat	-0.957815	4.87122e-05
ENSMUST00000145410.1	ENSMUSG00000085541.1	Gm16010	Annotated_lncRNA	ENSMUST00000143226	ENSMUSG00000006345	Ggt1	Nucleophile aminohydrolases, N-terminal||Gamma-glutamyltranspeptidase||-	-0.953046	7.05331e-05
ENSMUST00000145410.1	ENSMUSG00000085541.1	Gm16010	Annotated_lncRNA	ENSMUST00000022634	ENSMUSG00000022051	Bnip3l	BNIP3	-0.961567	3.52897e-05
ENSMUST00000145410.1	ENSMUSG00000085541.1	Gm16010	Annotated_lncRNA	ENSMUST00000134503	ENSMUSG00000006345	Ggt1	Nucleophile aminohydrolases, N-terminal||Gamma-glutamyltranspeptidase||-	-0.95056	8.42866e-05
ENSMUST00000145410.1	ENSMUSG00000085541.1	Gm16010	Annotated_lncRNA	ENSMUST00000116551	ENSMUSG00000038812	Trmt112	Uncharacterised protein family UPF0434/Trm112	-0.950023	8.74852e-05
ENSMUST00000145410.1	ENSMUSG00000085541.1	Gm16010	Annotated_lncRNA	ENSMUST00000084343	ENSMUSG00000066071	Cyp4a12a	Cytochrome P450, conserved site||Cytochrome P450||Cytochrome P450, E-class, group I	-0.954252	6.44716e-05
ENSMUST00000145410.1	ENSMUSG00000085541.1	Gm16010	Annotated_lncRNA	ENSMUST00000027185	ENSMUSG00000026027	Stradb	Protein kinase domain||Serine/threonine/dual specificity protein kinase, catalytic domain||-||Protein kinase-like domain	-0.950101	8.70164e-05
ENSMUST00000145410.1	ENSMUSG00000085541.1	Gm16010	Annotated_lncRNA	ENSMUST00000029968	ENSMUSG00000028292	Rars2	DALR anticodon binding||Aminoacyl-tRNA synthetase, class 1a, anticodon-binding||Arginine-tRNA ligase||-||Aminoacyl-tRNA synthetase, class I, conserved site||Arginyl tRNA synthetase N-terminal domain	-0.959453	4.2475e-05
ENSMUST00000145410.1	ENSMUSG00000085541.1	Gm16010	Annotated_lncRNA	ENSMUST00000107591	ENSMUSG00000030498	Gas2	Calponin homology domain||Growth-arrest-specific protein 2 domain||-	-0.97244	1.1139e-05
ENSMUST00000145410.1	ENSMUSG00000085541.1	Gm16010	Annotated_lncRNA	ENSMUST00000072697	ENSMUSG00000062908	Acadm	Acyl-CoA dehydrogenase/oxidase C-terminal||Acyl-CoA oxidase/dehydrogenase, central domain||Acyl-CoA dehydrogenase, conserved site||Acyl-CoA dehydrogenase/oxidase, N-terminal||Acyl-CoA dehydrogenase/oxidase, N-terminal and middle domain	-0.961759	3.46846e-05
ENSMUST00000145410.1	ENSMUSG00000085541.1	Gm16010	Annotated_lncRNA	ENSMUST00000046461	ENSMUSG00000040631	Dok4	IRS-type PTB domain||Pleckstrin homology domain	-0.951215	8.04946e-05
ENSMUST00000145410.1	ENSMUSG00000085541.1	Gm16010	Annotated_lncRNA	ENSMUST00000134710	ENSMUSG00000039578	Ccser1	-	-0.983578	1.83906e-06
ENSMUST00000145410.1	ENSMUSG00000085541.1	Gm16010	Annotated_lncRNA	ENSMUST00000043598	ENSMUSG00000038217	Tlcd2	TRAM/LAG1/CLN8 homology domain	-0.954081	6.53079e-05
ENSMUST00000145410.1	ENSMUSG00000085541.1	Gm16010	Annotated_lncRNA	ENSMUST00000111122	ENSMUSG00000020594	Pum2	Pumilio RNA-binding repeat||Armadillo-type fold||-	-0.950657	8.3713e-05
ENSMUST00000145410.1	ENSMUSG00000085541.1	Gm16010	Annotated_lncRNA	ENSMUST00000022380	ENSMUSG00000021832	Psmc6	26S proteasome subunit P45||ATPase, AAA-type, core||AAA+ ATPase domain||P-loop containing nucleoside triphosphate hydrolase||ATPase, AAA-type, conserved site	-0.9541	6.52122e-05
ENSMUST00000145410.1	ENSMUSG00000085541.1	Gm16010	Annotated_lncRNA	ENSMUST00000043696	ENSMUSG00000038224	Serpinf2	-||Serpin domain||Serpin, conserved site	-0.967296	2.01718e-05
ENSMUST00000145410.1	ENSMUSG00000085541.1	Gm16010	Annotated_lncRNA	ENSMUST00000171765	ENSMUSG00000024386	Proc	EGF-like domain||EGF-like calcium-binding, conserved site||EGF-like calcium-binding domain||EGF-type aspartate/asparagine hydroxylation site||Serine proteases, trypsin domain||EGF-like, conserved site||Peptidase S1, trypsin family, active site||Gamma-carboxyglutamic acid-rich (GLA) domain||Peptidase S1A, chymotrypsin-type||Peptidase S1, PA clan||Peptidase S1A, coagulation factor VII/IX/X/C/Z	-0.962502	3.24053e-05
ENSMUST00000145410.1	ENSMUSG00000085541.1	Gm16010	Annotated_lncRNA	ENSMUST00000045303	ENSMUSG00000040447	Spns2	Major facilitator superfamily domain||Major facilitator superfamily||-	0.963606	2.92184e-05
ENSMUST00000145410.1	ENSMUSG00000085541.1	Gm16010	Annotated_lncRNA	ENSMUST00000037141	ENSMUSG00000037111	Setd7	SET domain||MORN motif||Histone-lysine N-methyltransferase, SET	0.956811	5.28414e-05
ENSMUST00000145410.1	ENSMUSG00000085541.1	Gm16010	Annotated_lncRNA	ENSMUST00000112231	ENSMUSG00000048120	Entpd1	Nucleoside phosphatase GDA1/CD39	0.961408	3.5799e-05
ENSMUST00000145410.1	ENSMUSG00000085541.1	Gm16010	Annotated_lncRNA	ENSMUST00000123930	ENSMUSG00000030268	Bcat1	Aminotransferase class IV||Aminotransferase, class IV, conserved site||Branched-chain amino acid aminotransferase II	-0.95504	6.07132e-05
ENSMUST00000145410.1	ENSMUSG00000085541.1	Gm16010	Annotated_lncRNA	ENSMUST00000028841	ENSMUSG00000027363	Usp8	Ubiquitin specific protease, conserved site||Ubiquitin specific protease domain||USP8 dimerisation domain||Peptidase C19, ubiquitin carboxyl-terminal hydrolase||Rhodanese-like domain	-0.961809	3.45276e-05
ENSMUST00000145410.1	ENSMUSG00000085541.1	Gm16010	Annotated_lncRNA	ENSMUST00000048967	ENSMUSG00000037852	Cpe	Carboxypeptidase-like, regulatory domain||Peptidase M14, carboxypeptidase A	-0.950558	8.42956e-05
ENSMUST00000145410.1	ENSMUSG00000085541.1	Gm16010	Annotated_lncRNA	ENSMUST00000025234	ENSMUSG00000024376	Epb41l4a	FERM domain||FERM, C-terminal PH-like domain||FERM central domain||FERM conserved site||Ubiquitin-related domain||Ezrin/radixin/moesin-like||FERM adjacent (FA)||Band 4.1 domain||FERM, N-terminal	0.951504	7.88612e-05
ENSMUST00000145410.1	ENSMUSG00000085541.1	Gm16010	Annotated_lncRNA	ENSMUST00000001253	ENSMUSG00000020651	Slc26a4	Sulphate anion transporter, conserved site||STAS domain||SLC26A/SulP transporter domain||SLC26A/SulP transporter	0.97005	1.48673e-05
ENSMUST00000145410.1	ENSMUSG00000085541.1	Gm16010	Annotated_lncRNA	ENSMUST00000034285	ENSMUSG00000031827	Cotl1	Actin-depolymerising factor homology domain	0.958334	4.66725e-05
ENSMUST00000145410.1	ENSMUSG00000085541.1	Gm16010	Annotated_lncRNA	ENSMUST00000016631	ENSMUSG00000016487	Ppfibp1	Sterile alpha motif domain||-||Sterile alpha motif/pointed domain	-0.95166	7.79893e-05
ENSMUST00000145410.1	ENSMUSG00000085541.1	Gm16010	Annotated_lncRNA	ENSMUST00000072403	ENSMUSG00000049152	Ugt3a2	UDP-glucuronosyl/UDP-glucosyltransferase	-0.959124	4.36789e-05
ENSMUST00000145410.1	ENSMUSG00000085541.1	Gm16010	Annotated_lncRNA	ENSMUST00000102707	ENSMUSG00000028713	Cyp4b1	Cytochrome P450, E-class, group I||Cytochrome P450, conserved site||Cytochrome P450||Cytochrome P450, E-class, group II	-0.965448	2.44078e-05
ENSMUST00000145410.1	ENSMUSG00000085541.1	Gm16010	Annotated_lncRNA	ENSMUST00000006785	ENSMUSG00000021335	Slc17a1	-||Major facilitator superfamily||Major facilitator superfamily domain||Na-dependent inorganic phosphate cotransporter	-0.954204	6.47068e-05
ENSMUST00000145410.1	ENSMUSG00000085541.1	Gm16010	Annotated_lncRNA	ENSMUST00000107698	ENSMUSG00000060317	Acnat2	BAAT/Acyl-CoA thioester hydrolase C-terminal||Acyl-CoA thioester hydrolase/bile acid-CoA amino acid N-acetyltransferase||Acyl-CoA thioesterase, long chain||Alpha/Beta hydrolase fold	0.956016	5.62778e-05
ENSMUST00000145410.1	ENSMUSG00000085541.1	Gm16010	Annotated_lncRNA	ENSMUST00000117506	ENSMUSG00000059890	Ube4a	U box domain||-||Ubiquitin conjugation factor E4, core	-0.951319	7.99035e-05
ENSMUST00000145410.1	ENSMUSG00000085541.1	Gm16010	Annotated_lncRNA	ENSMUST00000025468	ENSMUSG00000024575	Pde6a	3'5'-cyclic nucleotide phosphodiesterase||GAF domain-like||3'5'-cyclic nucleotide phosphodiesterase, conserved site||GAF domain||HD/PDEase domain||3'5'-cyclic nucleotide phosphodiesterase, catalytic domain	-0.955526	5.84759e-05
ENSMUST00000145410.1	ENSMUSG00000085541.1	Gm16010	Annotated_lncRNA	ENSMUST00000115365	ENSMUSG00000079659	Tmem243	-||Protein of unknown function DUF2678	-0.951482	7.89845e-05
ENSMUST00000145410.1	ENSMUSG00000085541.1	Gm16010	Annotated_lncRNA	ENSMUST00000110422	ENSMUSG00000036083	Slc17a3	Major facilitator superfamily||Major facilitator superfamily domain||Sodium-dependent phosphate transport protein 4 , predicted	-0.955539	5.84163e-05
ENSMUST00000145410.1	ENSMUSG00000085541.1	Gm16010	Annotated_lncRNA	ENSMUST00000027036	ENSMUSG00000025903	Lypla1	Alpha/Beta hydrolase fold||Phospholipase/carboxylesterase/thioesterase	-0.963491	2.95405e-05
ENSMUST00000145410.1	ENSMUSG00000085541.1	Gm16010	Annotated_lncRNA	ENSMUST00000028949	ENSMUSG00000027455	Nsfl1c	UBA-like||UBX domain||SEP domain||Ubiquitin-related domain	-0.969659	1.55516e-05
ENSMUST00000145410.1	ENSMUSG00000085541.1	Gm16010	Annotated_lncRNA	ENSMUST00000032888	ENSMUSG00000030654	Arl6ip1	Reticulon||-	-0.965619	2.39901e-05
ENSMUST00000145410.1	ENSMUSG00000085541.1	Gm16010	Annotated_lncRNA	ENSMUST00000117137	ENSMUSG00000023914	Mep1a	Peptidase, metallopeptidase||Concanavalin A-like lectin/glucanase domain||EGF-like domain||MATH/TRAF domain||Peptidase M12A, astacin||MAM domain||TRAF-like||Meprin alpha/beta subunit	-0.951617	7.82246e-05
ENSMUST00000145410.1	ENSMUSG00000085541.1	Gm16010	Annotated_lncRNA	ENSMUST00000052740	ENSMUSG00000046603	Tcaim	Domain of unknown function DUF4460||Domain of unknown function DUF4461	-0.953487	6.82728e-05
ENSMUST00000145410.1	ENSMUSG00000085541.1	Gm16010	Annotated_lncRNA	ENSMUST00000081440	ENSMUSG00000030340	Scnn1a	Na+ channel, amiloride-sensitive, conserved site||Epithelial sodium channel||Na+ channel, amiloride-sensitive	0.963292	3.01023e-05
ENSMUST00000145410.1	ENSMUSG00000085541.1	Gm16010	Annotated_lncRNA	ENSMUST00000003720	ENSMUSG00000003623	Crot	Acyltransferase ChoActase/COT/CPT	-0.950035	8.74121e-05
ENSMUST00000145410.1	ENSMUSG00000085541.1	Gm16010	Annotated_lncRNA	ENSMUST00000056136	ENSMUSG00000044708	Kcnj10	Potassium channel, inwardly rectifying, Kir1.2||Immunoglobulin E-set||Potassium channel, inwardly rectifying, Kir	0.962821	3.14614e-05
ENSMUST00000145410.1	ENSMUSG00000085541.1	Gm16010	Annotated_lncRNA	ENSMUST00000169504	ENSMUSG00000022019	Tdrd3	Tudor domain||Ubiquitin-associated domain||Survival motor neuron||RecQ mediated genome instability protein, N-terminal||UBA-like	0.951776	7.734e-05
ENSMUST00000145410.1	ENSMUSG00000085541.1	Gm16010	Annotated_lncRNA	ENSMUST00000034178	ENSMUSG00000031725	Ces1f	Alpha/Beta hydrolase fold||Carboxylesterase type B, conserved site||Carboxylesterase type B, active site||-||Carboxylesterase, type B	-0.965326	2.47081e-05
ENSMUST00000145410.1	ENSMUSG00000085541.1	Gm16010	Annotated_lncRNA	ENSMUST00000070877	ENSMUSG00000022244	Amacr	CoA-transferase family III||CoA-transferase family III domain	-0.958988	4.41863e-05
ENSMUST00000145410.1	ENSMUSG00000085541.1	Gm16010	Annotated_lncRNA	ENSMUST00000162645	ENSMUSG00000007817	Zmiz1	-||Zinc finger, MIZ-type	0.951209	8.05271e-05
ENSMUST00000145410.1	ENSMUSG00000085541.1	Gm16010	Annotated_lncRNA	ENSMUST00000021806	ENSMUSG00000021376	Tpmt	Thiopurine S-methyltransferase||TPMT family||S-adenosyl-L-methionine-dependent methyltransferase	-0.969191	1.63996e-05
ENSMUST00000145410.1	ENSMUSG00000085541.1	Gm16010	Annotated_lncRNA	ENSMUST00000023559	ENSMUSG00000022853	Ehhadh	3-hydroxyacyl-CoA dehydrogenase, C-terminal||6-phosphogluconate dehydrogenase C-terminal domain-like||Crotonase superfamily||Enoyl-CoA hydratase/isomerase, conserved site||ClpP/crotonase-like domain||3-hydroxyacyl-CoA dehydrogenase, conserved site||3-hydroxyacyl-CoA dehydrogenase, NAD binding	-0.955724	5.75834e-05
ENSMUST00000145410.1	ENSMUSG00000085541.1	Gm16010	Annotated_lncRNA	ENSMUST00000096224	ENSMUSG00000022994	Adcy6	Adenylyl cyclase class-4/guanylyl cyclase, conserved site||Nucleotide cyclase||Adenylate cyclase, conserved domain||Adenylyl cyclase class-3/4/guanylyl cyclase	0.971073	1.31765e-05
ENSMUST00000145410.1	ENSMUSG00000085541.1	Gm16010	Annotated_lncRNA	ENSMUST00000122063	ENSMUSG00000040040	Ift88	-||Tetratricopeptide repeat-containing domain||Tetratricopeptide repeat||Tetratricopeptide repeat 1	-0.953741	6.69928e-05
ENSMUST00000145410.1	ENSMUSG00000085541.1	Gm16010	Annotated_lncRNA	ENSMUST00000005003	ENSMUSG00000004880	Lbr	Ergosterol biosynthesis ERG4/ERG24||Sterol reductase, conserved site||Lamin-B receptor of TUDOR domain||Tudor domain	-0.959234	4.32739e-05
ENSMUST00000145410.1	ENSMUSG00000085541.1	Gm16010	Annotated_lncRNA	ENSMUST00000108243	ENSMUSG00000027665	Pik3ca	Armadillo-type fold||C2 domain||Phosphoinositide 3-kinase, accessory (PIK) domain||Phosphatidylinositol 3-/4-kinase, catalytic domain||Phosphatidylinositol 3/4-kinase, conserved site||Phosphatidylinositol 3-kinase Ras-binding (PI3K RBD) domain||Phosphatidylinositol 3-kinase, C2 domain||Protein kinase-like domain||Ubiquitin-related domain||Phosphatidylinositol 3-kinase adaptor-binding (PI3K ABD) d…	-0.958235	4.7054e-05
ENSMUST00000145410.1	ENSMUSG00000085541.1	Gm16010	Annotated_lncRNA	ENSMUST00000127247	ENSMUSG00000048022	Tmem229a	-	-0.956186	5.55306e-05
ENSMUST00000145410.1	ENSMUSG00000085541.1	Gm16010	Annotated_lncRNA	ENSMUST00000025778	ENSMUSG00000024827	Gldc	Glycine cleavage system P-protein, N-terminal||Aromatic amino acid beta-eliminating lyase/threonine aldolase||Pyridoxal phosphate-dependent transferase||Glycine dehydrogenase (decarboxylating)	0.952294	7.45134e-05
ENSMUST00000145410.1	ENSMUSG00000085541.1	Gm16010	Annotated_lncRNA	ENSMUST00000003268	ENSMUSG00000003200	Sh3gl1	SH3 domain||BAR domain	0.972443	1.11341e-05
ENSMUST00000145410.1	ENSMUSG00000085541.1	Gm16010	Annotated_lncRNA	ENSMUST00000076891	ENSMUSG00000024982	Zdhhc6	Variant SH3 domain||SH3 domain||Zinc finger, DHHC-type, palmitoyltransferase	-0.952887	7.13622e-05
ENSMUST00000180863.1	ENSMUSG00000097815.1	Gm26809	Annotated_lncRNA	ENSMUST00000134177	ENSMUSG00000034928	Rnf44	Zinc finger, RING-type||-	0.952151	7.52848e-05
ENSMUST00000180863.1	ENSMUSG00000097815.1	Gm26809	Annotated_lncRNA	ENSMUST00000182812	ENSMUSG00000035325	Sec31a	WD40-repeat-containing domain||WD40 repeat||-||Ancestral coatomer element 1, Sec16/Sec31	0.972787	1.06587e-05
ENSMUST00000180863.1	ENSMUSG00000097815.1	Gm26809	Annotated_lncRNA	ENSMUST00000108675	ENSMUSG00000020903	Stx8	Target SNARE coiled-coil homology domain||-	0.975682	7.21055e-06
ENSMUST00000180863.1	ENSMUSG00000097815.1	Gm26809	Annotated_lncRNA	ENSMUST00000180887	ENSMUSG00000034780	B3galt1	Glycosyl transferase, family 31||-||Nucleotide-diphospho-sugar transferases	0.954808	6.18056e-05
ENSMUST00000180863.1	ENSMUSG00000097815.1	Gm26809	Annotated_lncRNA	ENSMUST00000163590	ENSMUSG00000024505	Dtwd2	DTW	-0.950325	8.5674e-05
ENSMUST00000180863.1	ENSMUSG00000097815.1	Gm26809	Annotated_lncRNA	ENSMUST00000091064	ENSMUSG00000070934	Rraga	Gtr1/RagA G protein||P-loop containing nucleoside triphosphate hydrolase	-0.961026	3.7041e-05
ENSMUST00000180863.1	ENSMUSG00000097815.1	Gm26809	Annotated_lncRNA	ENSMUST00000022746	ENSMUSG00000022146	Osmr	Long hematopoietin receptor, Gp130 family 2, conserved site||Fibronectin type III	0.955121	6.03349e-05
ENSMUST00000195512.1	ENSMUSG00000103651.1	Gm37206	Annotated_lncRNA	ENSMUST00000035033	ENSMUSG00000032458	Copb2	WD40 repeat||Coatomer beta' subunit (COPB2)||G-protein beta WD-40 repeat||WD40-repeat-containing domain||Coatomer, WD associated region	-0.965858	2.34186e-05
ENSMUST00000195512.1	ENSMUSG00000103651.1	Gm37206	Annotated_lncRNA	ENSMUST00000172868	ENSMUSG00000015120	Ube2i	Ubiquitin-conjugating enzyme, active site||Ubiquitin-conjugating enzyme E2||-||Ubiquitin-conjugating enzyme/RWD-like	0.976089	6.79991e-06
ENSMUST00000195512.1	ENSMUSG00000103651.1	Gm37206	Annotated_lncRNA	ENSMUST00000095005	ENSMUSG00000073208	Speer4c	Domain of unknown function DUF622	0.97933	4.0972e-06
ENSMUST00000195512.1	ENSMUSG00000103651.1	Gm37206	Annotated_lncRNA	ENSMUST00000025418	ENSMUSG00000024537	Psmg2	Proteasome assembly chaperone 2||Proteasome assembly chaperone 2, eukaryotic	-0.992691	1.09109e-07
ENSMUST00000195512.1	ENSMUSG00000103651.1	Gm37206	Annotated_lncRNA	ENSMUST00000110524	ENSMUSG00000027219	Slc28a2	Concentrative nucleoside transporter C-terminal domain||Nucleoside transporter/FeoB GTPase, Gate domain||Concentrative nucleoside transporter, metazoan/bacterial||Concentrative nucleoside transporter N-terminal domain	-0.965172	2.50886e-05
ENSMUST00000195512.1	ENSMUSG00000103651.1	Gm37206	Annotated_lncRNA	ENSMUST00000036682	ENSMUSG00000033885	Pxk	Protein kinase-like domain||Serine/threonine/dual specificity protein kinase, catalytic domain||Protein kinase domain||Phox homologous domain||WH2 domain	0.965749	2.36767e-05
ENSMUST00000195512.1	ENSMUSG00000103651.1	Gm37206	Annotated_lncRNA	ENSMUST00000170955	ENSMUSG00000018126	Baiap2l2	SH3 domain||IMD/I-BAR domain	0.956652	5.35147e-05
ENSMUST00000195512.1	ENSMUSG00000103651.1	Gm37206	Annotated_lncRNA	ENSMUST00000154689	ENSMUSG00000028863	Meaf6	Histone H4 acetyltransferase, NuA4 complex, Eaf6	0.979673	3.86517e-06
ENSMUST00000195512.1	ENSMUSG00000103651.1	Gm37206	Annotated_lncRNA	ENSMUST00000076219	ENSMUSG00000041360	Pum3	Armadillo-type fold||Pumilio RNA-binding repeat||CPL domain	-0.955237	5.97983e-05
ENSMUST00000195512.1	ENSMUSG00000103651.1	Gm37206	Annotated_lncRNA	ENSMUST00000031734	ENSMUSG00000093445	Lrch4	Leucine-rich repeat, typical subtype||Calponin homology domain||-||Leucine-rich repeat||Leucine rich repeat 4	0.952109	7.55131e-05
ENSMUST00000195512.1	ENSMUSG00000103651.1	Gm37206	Annotated_lncRNA	ENSMUST00000049064	ENSMUSG00000036894	Rap2b	Small GTPase superfamily, Rab type||Small GTPase superfamily, Ras type||P-loop containing nucleoside triphosphate hydrolase||Small GTP-binding protein domain||Small GTPase superfamily||Small GTPase superfamily, Rho type	0.972789	1.06558e-05
ENSMUST00000195512.1	ENSMUSG00000103651.1	Gm37206	Annotated_lncRNA	ENSMUST00000120340	ENSMUSG00000040139	9430038I01Rik	-	0.970945	1.33814e-05
ENSMUST00000195512.1	ENSMUSG00000103651.1	Gm37206	Annotated_lncRNA	ENSMUST00000049544	ENSMUSG00000044033	Ccdc141	Immunoglobulin subtype||Spectrin/alpha-actinin||-||Immunoglobulin subtype 2||Immunoglobulin-like domain||Immunoglobulin I-set	0.966757	2.1348e-05
ENSMUST00000195512.1	ENSMUSG00000103651.1	Gm37206	Annotated_lncRNA	ENSMUST00000115516	ENSMUSG00000062012	Zfp13	Zinc finger, C2H2-like||Krueppel-associated box||Zinc finger, C2H2	0.956355	5.47929e-05
ENSMUST00000195512.1	ENSMUSG00000103651.1	Gm37206	Annotated_lncRNA	ENSMUST00000079368	ENSMUSG00000062438	Adam1b	Disintegrin domain||EGF-like domain||Peptidase M12B, propeptide||Peptidase M12B, ADAM/reprolysin||EGF-like, conserved site||ADAM, cysteine-rich	0.956697	5.33259e-05
ENSMUST00000195512.1	ENSMUSG00000103651.1	Gm37206	Annotated_lncRNA	ENSMUST00000108491	ENSMUSG00000053228	Ceacam3	Immunoglobulin-like domain||Immunoglobulin subtype 2||Immunoglobulin I-set||Immunoglobulin subtype||Immunoglobulin V-set domain	0.958732	4.51464e-05
ENSMUST00000195512.1	ENSMUSG00000103651.1	Gm37206	Annotated_lncRNA	ENSMUST00000190679	ENSMUSG00000033159	Cnppd1	Cyclin PHO80-like||-	0.952515	7.3325e-05
ENSMUST00000195512.1	ENSMUSG00000103651.1	Gm37206	Annotated_lncRNA	ENSMUST00000117971	ENSMUSG00000029438	Bcl7a	BCL7	0.958203	4.71807e-05
ENSMUST00000195512.1	ENSMUSG00000103651.1	Gm37206	Annotated_lncRNA	ENSMUST00000096224	ENSMUSG00000022994	Adcy6	Adenylyl cyclase class-4/guanylyl cyclase, conserved site||Nucleotide cyclase||Adenylate cyclase, conserved domain||Adenylyl cyclase class-3/4/guanylyl cyclase	0.974377	8.64718e-06
ENSMUST00000195512.1	ENSMUSG00000103651.1	Gm37206	Annotated_lncRNA	ENSMUST00000188090	ENSMUSG00000054387	Mdm4	Zinc finger, RING-type||p53 negative regulator Mdm2/Mdm4||MDM4||SWIB/MDM2 domain||Zinc finger, RanBP2-type	0.966584	2.1737e-05
ENSMUST00000195512.1	ENSMUSG00000103651.1	Gm37206	Annotated_lncRNA	ENSMUST00000119336	ENSMUSG00000054708	Ankrd24	-||Ankyrin repeat-containing domain||Ankyrin repeat	0.968128	1.84469e-05
ENSMUST00000195512.1	ENSMUSG00000103651.1	Gm37206	Annotated_lncRNA	ENSMUST00000197624	ENSMUSG00000029714	Gigyf1	-||GYF domain	0.957066	5.17694e-05
ENSMUST00000195512.1	ENSMUSG00000103651.1	Gm37206	Annotated_lncRNA	ENSMUST00000124830	ENSMUSG00000054889	Dsp	Plectin repeat||Spectrin/alpha-actinin	0.951681	7.78704e-05
ENSMUST00000195512.1	ENSMUSG00000103651.1	Gm37206	Annotated_lncRNA	ENSMUST00000065253	ENSMUSG00000034853	Acot11	START domain||HotDog domain||Thioesterase superfamily	-0.971481	1.2543e-05
ENSMUST00000195512.1	ENSMUSG00000103651.1	Gm37206	Annotated_lncRNA	ENSMUST00000113239	ENSMUSG00000005362	Crbn	ATP-dependent protease La (LON), substrate-binding domain||PUA-like domain	-0.958307	4.67771e-05
ENSMUST00000195512.1	ENSMUSG00000103651.1	Gm37206	Annotated_lncRNA	ENSMUST00000056623	ENSMUSG00000048108	Tmem72	-	0.99325	8.26373e-08
ENSMUST00000195512.1	ENSMUSG00000103651.1	Gm37206	Annotated_lncRNA	ENSMUST00000082439	ENSMUSG00000035757	Selo	Uncharacterised protein family UPF0061	-0.955379	5.91485e-05
ENSMUST00000195512.1	ENSMUSG00000103651.1	Gm37206	Annotated_lncRNA	ENSMUST00000046207	ENSMUSG00000037361	Sf3b6	RNA recognition motif domain	-0.956124	5.58032e-05
ENSMUST00000195512.1	ENSMUSG00000103651.1	Gm37206	Annotated_lncRNA	ENSMUST00000017567	ENSMUSG00000017421	Zfp207	-||Zinc finger, C2H2||Zinc finger, C2H2-like	-0.964677	2.63459e-05
ENSMUST00000125626.1	ENSMUSG00000051832.7	E230016K23Rik	Annotated_lncRNA	ENSMUST00000072836	ENSMUSG00000057342	Sphk2	NAD kinase/diacylglycerol kinase-like domain||Diacylglycerol kinase, catalytic domain	0.960903	3.74475e-05
ENSMUST00000125626.1	ENSMUSG00000051832.7	E230016K23Rik	Annotated_lncRNA	ENSMUST00000165017	ENSMUSG00000015176	Nolc1	SRP40, C-terminal||LIS1 homology motif	-0.961553	3.53352e-05
ENSMUST00000125626.1	ENSMUSG00000051832.7	E230016K23Rik	Annotated_lncRNA	ENSMUST00000199736	ENSMUSG00000032482	Cspg5	Neural chondroitin sulphate proteoglycan cytoplasmic||Chondroitin sulphate attachment	0.967985	1.87363e-05
ENSMUST00000125626.1	ENSMUSG00000051832.7	E230016K23Rik	Annotated_lncRNA	ENSMUST00000206911	ENSMUSG00000006269	Atp6v1b1	ATPase, F1/V1/A1 complex, alpha/beta subunit, nucleotide-binding domain||ATPase, F1 complex alpha/beta subunit, N-terminal domain||P-loop containing nucleoside triphosphate hydrolase||-||ATPase, alpha/beta subunit, nucleotide-binding domain, active site||ATPase, F1/V1/A1 complex, alpha/beta subunit, C-terminal||ATPase, V1 complex, subunit B	0.96702	2.07686e-05
ENSMUST00000125626.1	ENSMUSG00000051832.7	E230016K23Rik	Annotated_lncRNA	ENSMUST00000002048	ENSMUSG00000001983	Taco1	YebC-like||Transcriptional regulator TACO1-like	-0.952325	7.4346e-05
ENSMUST00000125626.1	ENSMUSG00000051832.7	E230016K23Rik	Annotated_lncRNA	ENSMUST00000026073	ENSMUSG00000025086	Trub1	Pseudouridine synthase II||Pseudouridine synthase, catalytic domain||tRNA pseudouridine synthase II, TruB	-0.953146	7.00147e-05
ENSMUST00000125626.1	ENSMUSG00000051832.7	E230016K23Rik	Annotated_lncRNA	ENSMUST00000057115	ENSMUSG00000044792	Isca1	FeS cluster insertion protein||FeS cluster insertion, C-terminal, conserved site||FeS cluster biogenesis	-0.965043	2.5414e-05
ENSMUST00000125626.1	ENSMUSG00000051832.7	E230016K23Rik	Annotated_lncRNA	ENSMUST00000162431	ENSMUSG00000025727	A930017K11Rik	-	0.953151	6.99903e-05
ENSMUST00000125626.1	ENSMUSG00000051832.7	E230016K23Rik	Annotated_lncRNA	ENSMUST00000174216	ENSMUSG00000015120	Ube2i	Ubiquitin-conjugating enzyme, active site||Ubiquitin-conjugating enzyme E2||-||Ubiquitin-conjugating enzyme/RWD-like	0.966869	2.11004e-05
ENSMUST00000125626.1	ENSMUSG00000051832.7	E230016K23Rik	Annotated_lncRNA	ENSMUST00000044668	ENSMUSG00000035948	Acss3	AMP-dependent synthetase/ligase||AMP-binding enzyme C-terminal domain||AMP-binding, conserved site	0.959482	4.23701e-05
ENSMUST00000125626.1	ENSMUSG00000051832.7	E230016K23Rik	Annotated_lncRNA	ENSMUST00000200585	ENSMUSG00000037225	Fgf2	Cytokine, IL-1-like||IL-1 family/FGF family||Fibroblast growth factor family	0.963975	2.82061e-05
ENSMUST00000125626.1	ENSMUSG00000051832.7	E230016K23Rik	Annotated_lncRNA	ENSMUST00000113138	ENSMUSG00000090145	Ugt1a6b	UDP-glucuronosyl/UDP-glucosyltransferase	-0.969635	1.55929e-05
ENSMUST00000125626.1	ENSMUSG00000051832.7	E230016K23Rik	Annotated_lncRNA	ENSMUST00000047749	ENSMUSG00000036934	4921524J17Rik	Uncharacterised domain UPF0547	-0.954077	6.53271e-05
ENSMUST00000125626.1	ENSMUSG00000051832.7	E230016K23Rik	Annotated_lncRNA	ENSMUST00000026274	ENSMUSG00000025245	Lztfl1	-	-0.966018	2.30404e-05
ENSMUST00000125626.1	ENSMUSG00000051832.7	E230016K23Rik	Annotated_lncRNA	ENSMUST00000198435	ENSMUSG00000029254	Stap1	SH2 domain||Pleckstrin homology domain	0.966241	2.25197e-05
ENSMUST00000125626.1	ENSMUSG00000051832.7	E230016K23Rik	Annotated_lncRNA	ENSMUST00000172788	ENSMUSG00000030549	Rhcg	Blood group Rhesus C/E/D polypeptide||Ammonium transporter AmtB-like domain||-	0.954761	6.20271e-05
ENSMUST00000125626.1	ENSMUSG00000051832.7	E230016K23Rik	Annotated_lncRNA	ENSMUST00000169504	ENSMUSG00000022019	Tdrd3	Tudor domain||Ubiquitin-associated domain||Survival motor neuron||RecQ mediated genome instability protein, N-terminal||UBA-like	0.965365	2.46119e-05
ENSMUST00000125626.1	ENSMUSG00000051832.7	E230016K23Rik	Annotated_lncRNA	ENSMUST00000058997	ENSMUSG00000044646	Zbtb7c	Zinc finger, C2H2-like||POZ domain||BTB/POZ domain||Zinc finger, C2H2||Armadillo-type fold	0.96689	2.1054e-05
ENSMUST00000125626.1	ENSMUSG00000051832.7	E230016K23Rik	Annotated_lncRNA	ENSMUST00000057261	ENSMUSG00000053040	Aph1c	Gamma-secretase subunit Aph-1	-0.952339	7.42678e-05
ENSMUST00000125626.1	ENSMUSG00000051832.7	E230016K23Rik	Annotated_lncRNA	ENSMUST00000036606	ENSMUSG00000031216	Stard8	START domain||Rho GTPase activation protein||Rho GTPase-activating protein domain||-	0.966019	2.30369e-05
ENSMUST00000125626.1	ENSMUSG00000051832.7	E230016K23Rik	Annotated_lncRNA	ENSMUST00000040859	ENSMUSG00000036602	Alx1	Homeodomain-like||Homeobox domain||OAR domain||Homeobox, conserved site	-0.950916	8.22076e-05
ENSMUST00000125626.1	ENSMUSG00000051832.7	E230016K23Rik	Annotated_lncRNA	ENSMUST00000140770	ENSMUSG00000066438	Plekhd1	Pleckstrin homology domain||-	0.988327	5.5938e-07
ENSMUST00000125626.1	ENSMUSG00000051832.7	E230016K23Rik	Annotated_lncRNA	ENSMUST00000076034	ENSMUSG00000059479	B3gnt8	Glycosyl transferase, family 31||-	0.957369	5.05189e-05
ENSMUST00000125626.1	ENSMUSG00000051832.7	E230016K23Rik	Annotated_lncRNA	ENSMUST00000081232	ENSMUSG00000034330	Plcg2	Phospholipase C, phosphatidylinositol-specific, Y domain||SH2 domain||Phosphatidylinositol-specific phospholipase C, X domain||Phosphatidylinositol-4, 5-bisphosphate phosphodiesterase gamma||Pleckstrin homology domain||C2 domain||Phosphoinositide-specific phospholipase C, EF-hand-like domain||SH3 domain||PLC-like phosphodiesterase, TIM beta/alpha-barrel domain||Phosphoinositide phospholipase C fa…	0.971724	1.21766e-05
ENSMUST00000181286.1	ENSMUSG00000097804.1	Gm16685	Annotated_lncRNA	ENSMUST00000024906	ENSMUSG00000024098	Twsg1	Twisted gastrulation (Tsg) protein	0.962542	3.22867e-05
ENSMUST00000181286.1	ENSMUSG00000097804.1	Gm16685	Annotated_lncRNA	ENSMUST00000110824	ENSMUSG00000020564	Atxn7l1	SCA7 domain||-	-0.959271	4.3138e-05
ENSMUST00000181286.1	ENSMUSG00000097804.1	Gm16685	Annotated_lncRNA	ENSMUST00000139848	ENSMUSG00000034472	Rasd2	P-loop containing nucleoside triphosphate hydrolase||Small GTPase superfamily||Small GTP-binding protein domain||Small GTPase superfamily, Rho type||Ran GTPase||Small GTPase superfamily, Rab type||Small GTPase superfamily, Ras type	0.960555	3.86117e-05
ENSMUST00000181286.1	ENSMUSG00000097804.1	Gm16685	Annotated_lncRNA	ENSMUST00000120310	ENSMUSG00000028194	Ddah1	Amidinotransferase	-0.962653	3.19571e-05
ENSMUST00000181286.1	ENSMUSG00000097804.1	Gm16685	Annotated_lncRNA	ENSMUST00000001920	ENSMUSG00000001864	Aif1l	-||EF-hand domain	0.950745	8.31994e-05
ENSMUST00000181286.1	ENSMUSG00000097804.1	Gm16685	Annotated_lncRNA	ENSMUST00000171629	ENSMUSG00000045094	Arhgef37	Variant SH3 domain||BAR domain||SH3 domain||Dbl homology (DH) domain	0.953362	6.89087e-05
ENSMUST00000181286.1	ENSMUSG00000097804.1	Gm16685	Annotated_lncRNA	ENSMUST00000084770	ENSMUSG00000055373	Fut9	Glycosyl transferase family 10	-0.965868	2.33936e-05
ENSMUST00000181286.1	ENSMUSG00000097804.1	Gm16685	Annotated_lncRNA	ENSMUST00000024739	ENSMUSG00000023944	Hsp90ab1	Ribosomal protein S5 domain 2-type fold||Histidine kinase-like ATPase, C-terminal domain||Heat shock protein Hsp90, conserved site||Heat shock protein Hsp90, N-terminal||Heat shock protein Hsp90 family	-0.960053	4.03412e-05
ENSMUST00000181286.1	ENSMUSG00000097804.1	Gm16685	Annotated_lncRNA	ENSMUST00000030677	ENSMUSG00000028862	Map3k6	Domain of unknown function DUF4071||Serine/threonine-protein kinase, active site||Protein kinase domain||Protein kinase-like domain||Serine/threonine/dual specificity protein kinase, catalytic domain||Sterile alpha motif/pointed domain||Protein kinase, ATP binding site	0.9635	2.95144e-05
ENSMUST00000181286.1	ENSMUSG00000097804.1	Gm16685	Annotated_lncRNA	ENSMUST00000026126	ENSMUSG00000025133	Ints4	Armadillo-type fold||-	-0.955857	5.69862e-05
ENSMUST00000181286.1	ENSMUSG00000097804.1	Gm16685	Annotated_lncRNA	ENSMUST00000110020	ENSMUSG00000021190	Lgmn	Peptidase C13, legumain	0.96918	1.64204e-05
ENSMUST00000181286.1	ENSMUSG00000097804.1	Gm16685	Annotated_lncRNA	ENSMUST00000051014	ENSMUSG00000034584	Exph5	Rab-binding domain	0.958759	4.50448e-05
ENSMUST00000181286.1	ENSMUSG00000097804.1	Gm16685	Annotated_lncRNA	ENSMUST00000057921	ENSMUSG00000062421	Arf2	Small GTPase superfamily, Rab type||Small GTPase superfamily, ARF type||Small GTP-binding protein domain||P-loop containing nucleoside triphosphate hydrolase||Small GTPase superfamily, ARF/SAR type||Small GTPase superfamily, SAR1-type	0.951574	7.84681e-05
ENSMUST00000181286.1	ENSMUSG00000097804.1	Gm16685	Annotated_lncRNA	ENSMUST00000031243	ENSMUSG00000029304	Spp1	Osteopontin||Osteopontin, conserved site	0.955697	5.77038e-05
ENSMUST00000181286.1	ENSMUSG00000097804.1	Gm16685	Annotated_lncRNA	ENSMUST00000143829	ENSMUSG00000036087	Slain2	SLAIN motif-containing protein	0.972437	1.11426e-05
ENSMUST00000181286.1	ENSMUSG00000097804.1	Gm16685	Annotated_lncRNA	ENSMUST00000019992	ENSMUSG00000019846	Lama4	EGF-like domain||Concanavalin A-like lectin/glucanase domain||Laminin alpha, domain I||Laminin domain II||Laminin EGF domain||Laminin G domain	-0.983221	1.98202e-06
ENSMUST00000181286.1	ENSMUSG00000097804.1	Gm16685	Annotated_lncRNA	ENSMUST00000006828	ENSMUSG00000006651	Aplp1	Amyloidogenic glycoprotein, copper-binding||Amyloidogenic glycoprotein||Amyloidogenic glycoprotein, extracellular domain conserved site||Amyloidogenic glycoprotein, intracellular domain, conserved site||Amyloidogenic glycoprotein, heparin-binding||Amyloidogenic glycoprotein, extracellular||Amyloidogenic glycoprotein, E2 domain||Beta-amyloid precursor protein C-terminal	0.96174	3.47432e-05
ENSMUST00000181286.1	ENSMUSG00000097804.1	Gm16685	Annotated_lncRNA	ENSMUST00000055698	ENSMUSG00000046352	Gjb2	Connexin, N-terminal||Connexin||Gap junction protein, cysteine-rich domain||Connexin, conserved site||Gap junction beta-2 protein (Cx26)	-0.953488	6.8269e-05
ENSMUST00000181286.1	ENSMUSG00000097804.1	Gm16685	Annotated_lncRNA	ENSMUST00000054095	ENSMUSG00000037653	Kctd8	Potassium channel tetramerisation-type BTB domain||BTB/POZ domain||POZ domain	0.952471	7.35613e-05
ENSMUST00000181286.1	ENSMUSG00000097804.1	Gm16685	Annotated_lncRNA	ENSMUST00000111178	ENSMUSG00000020658	Efr3b	Armadillo-type fold	-0.954536	6.3098e-05
ENSMUST00000181286.1	ENSMUSG00000097804.1	Gm16685	Annotated_lncRNA	ENSMUST00000093772	ENSMUSG00000013419	Zfp651	Zinc finger, C2H2||Zinc finger, C2H2-like||POZ domain||BTB/POZ domain	0.950526	8.44832e-05
ENSMUST00000181286.1	ENSMUSG00000097804.1	Gm16685	Annotated_lncRNA	ENSMUST00000036355	ENSMUSG00000033149	Phldb2	Pleckstrin homology domain||-	-0.954566	6.29564e-05
ENSMUST00000181286.1	ENSMUSG00000097804.1	Gm16685	Annotated_lncRNA	ENSMUST00000063446	ENSMUSG00000061878	Sphk1	Diacylglycerol kinase, catalytic domain||NAD kinase/diacylglycerol kinase-like domain	0.971216	1.29519e-05
ENSMUST00000181286.1	ENSMUSG00000097804.1	Gm16685	Annotated_lncRNA	ENSMUST00000000221	ENSMUSG00000000216	Scnn1g	Na+ channel, amiloride-sensitive||Epithelial sodium channel||Na+ channel, amiloride-sensitive, conserved site	0.95989	4.09122e-05
ENSMUST00000181286.1	ENSMUSG00000097804.1	Gm16685	Annotated_lncRNA	ENSMUST00000161576	ENSMUSG00000031770	Herpud1	Ubiquitin-related domain||Ubiquitin domain	0.961343	3.60066e-05
ENSMUST00000181286.1	ENSMUSG00000097804.1	Gm16685	Annotated_lncRNA	ENSMUST00000143914	ENSMUSG00000064310	Zpld1	Zona pellucida domain	-0.953056	7.04833e-05
ENSMUST00000181286.1	ENSMUSG00000097804.1	Gm16685	Annotated_lncRNA	ENSMUST00000050897	ENSMUSG00000043065	Spice1	-	-0.965042	2.54156e-05
ENSMUST00000181286.1	ENSMUSG00000097804.1	Gm16685	Annotated_lncRNA	ENSMUST00000071522	ENSMUSG00000057913	Gm10032	-	0.969631	1.5601e-05
ENSMUST00000181286.1	ENSMUSG00000097804.1	Gm16685	Annotated_lncRNA	ENSMUST00000014640	ENSMUSG00000014496	Ankrd28	Ankyrin repeat-containing domain||Ankyrin repeat	0.950037	8.73995e-05
ENSMUST00000181286.1	ENSMUSG00000097804.1	Gm16685	Annotated_lncRNA	ENSMUST00000030693	ENSMUSG00000028874	Fgr	Protein kinase-like domain||Protein kinase, ATP binding site||SH2 domain||Tyrosine-protein kinase, catalytic domain||Serine-threonine/tyrosine-protein kinase catalytic domain||Tyrosine-protein kinase, active site||Protein kinase domain||SH3 domain	-0.955172	6.00982e-05
ENSMUST00000181286.1	ENSMUSG00000097804.1	Gm16685	Annotated_lncRNA	ENSMUST00000006749	ENSMUSG00000006574	Slc4a1	Anion exchange, conserved site||Anion exchange protein 1||Band 3 cytoplasmic domain||Bicarbonate transporter, C-terminal||Anion exchange protein||Bicarbonate transporter, eukaryotic||Phosphotransferase/anion transporter	0.955161	6.01537e-05
ENSMUST00000181286.1	ENSMUSG00000097804.1	Gm16685	Annotated_lncRNA	ENSMUST00000057019	ENSMUSG00000044338	Aplnr	-||G protein-coupled receptor, rhodopsin-like||GPCR, rhodopsin-like, 7TM||APJ receptor	-0.965118	2.52233e-05
ENSMUST00000181286.1	ENSMUSG00000097804.1	Gm16685	Annotated_lncRNA	ENSMUST00000024755	ENSMUSG00000023959	Clic5	Glutathione S-transferase, C-terminal-like||Intracellular chloride channel||Glutathione S-transferase, N-terminal||Thioredoxin-like fold	-0.952594	7.29086e-05
ENSMUST00000181286.1	ENSMUSG00000097804.1	Gm16685	Annotated_lncRNA	ENSMUST00000069620	ENSMUSG00000055866	Per2	PAS fold-3||Period circadian-like, C-terminal||PAS domain	0.965137	2.51758e-05
ENSMUST00000181286.1	ENSMUSG00000097804.1	Gm16685	Annotated_lncRNA	ENSMUST00000000395	ENSMUSG00000000385	Tmprss2	Low-density lipoprotein (LDL) receptor class A, conserved site||Peptidase S1A, chymotrypsin-type||Peptidase S1, PA clan||Peptidase S1, trypsin family, active site||Serine proteases, trypsin domain||SRCR-like domain||SRCR domain||Low-density lipoprotein (LDL) receptor class A repeat	0.95327	6.9378e-05
ENSMUST00000181286.1	ENSMUSG00000097804.1	Gm16685	Annotated_lncRNA	ENSMUST00000057829	ENSMUSG00000044018	Mrpl50	Ribosomal protein L50, mitochondria	-0.957284	5.08671e-05
ENSMUST00000181286.1	ENSMUSG00000097804.1	Gm16685	Annotated_lncRNA	ENSMUST00000036928	ENSMUSG00000038776	Ephx1	Epoxide hydrolase-like||Epoxide hydrolase, N-terminal||Alpha/beta hydrolase fold-1||Alpha/Beta hydrolase fold||Epoxide hydrolase	0.975053	7.87951e-06
ENSMUST00000181286.1	ENSMUSG00000097804.1	Gm16685	Annotated_lncRNA	ENSMUST00000126534	ENSMUSG00000033685	Ucp2	Mitochondrial brown fat uncoupling protein||Mitochondrial substrate/solute carrier	0.971516	1.24899e-05
ENSMUST00000181286.1	ENSMUSG00000097804.1	Gm16685	Annotated_lncRNA	ENSMUST00000023754	ENSMUSG00000043144	Aqp6	Aquaporin 6||Aquaporin-like||Major intrinsic protein, conserved site||Major intrinsic protein	0.952648	7.26187e-05
ENSMUST00000181286.1	ENSMUSG00000097804.1	Gm16685	Annotated_lncRNA	ENSMUST00000127305	ENSMUSG00000010080	Epn3	ENTH domain||Ubiquitin interacting motif||ENTH/VHS	0.969578	1.56961e-05
ENSMUST00000181286.1	ENSMUSG00000097804.1	Gm16685	Annotated_lncRNA	ENSMUST00000085635	ENSMUSG00000066595	Mfsd7b	Major facilitator superfamily domain||Major facilitator superfamily	0.956663	5.34702e-05
ENSMUST00000181286.1	ENSMUSG00000097804.1	Gm16685	Annotated_lncRNA	ENSMUST00000025567	ENSMUSG00000024665	Fads2	Fatty acid desaturase domain||Fatty acid desaturase||Cytochrome b5-like heme/steroid binding domain	-0.959728	4.14873e-05
ENSMUST00000181286.1	ENSMUSG00000097804.1	Gm16685	Annotated_lncRNA	ENSMUST00000206643	ENSMUSG00000030733	Sh2b1	Pleckstrin homology domain||Phenylalanine zipper||SH2 domain	-0.953197	6.97539e-05
ENSMUST00000181286.1	ENSMUSG00000097804.1	Gm16685	Annotated_lncRNA	ENSMUST00000027871	ENSMUSG00000026581	Sell	C-type lectin fold||EGF-like, conserved site||C-type lectin, conserved site||L-selectin||Sushi/SCR/CCP domain||EGF-like domain, extracellular||Selectin superfamily||C-type lectin||EGF-like domain	-0.962576	3.21851e-05
ENSMUST00000181286.1	ENSMUSG00000097804.1	Gm16685	Annotated_lncRNA	ENSMUST00000060271	ENSMUSG00000047861	Foxi1	Fork head domain||Fork head domain conserved site1	0.966293	2.24002e-05
ENSMUST00000181286.1	ENSMUSG00000097804.1	Gm16685	Annotated_lncRNA	ENSMUST00000003397	ENSMUSG00000003309	Ap1m2	AP complex, mu/sigma subunit||Clathrin adaptor, mu subunit, conserved site||Mu homology domain||Longin-like domain||Clathrin adaptor, mu subunit	0.976146	6.74345e-06
ENSMUST00000181286.1	ENSMUSG00000097804.1	Gm16685	Annotated_lncRNA	ENSMUST00000102772	ENSMUSG00000020377	Ltc4s	-||5-lipoxygenase-activating protein||FLAP/GST2/LTC4S, conserved site||Membrane-associated, eicosanoid/glutathione metabolism (MAPEG) protein	0.957531	4.9855e-05
ENSMUST00000181286.1	ENSMUSG00000097804.1	Gm16685	Annotated_lncRNA	ENSMUST00000081769	ENSMUSG00000034488	Edil3	Coagulation factor 5/8 C-terminal domain||EGF-like calcium-binding, conserved site||EGF-like domain||EGF-like calcium-binding domain||EGF-type aspartate/asparagine hydroxylation site||EGF-like, conserved site||Galactose-binding domain-like	-0.963749	2.88239e-05
ENSMUST00000181286.1	ENSMUSG00000097804.1	Gm16685	Annotated_lncRNA	ENSMUST00000073339	ENSMUSG00000006373	Pgrmc1	Cytochrome b5-like heme/steroid binding domain	0.956797	5.28978e-05
ENSMUST00000181286.1	ENSMUSG00000097804.1	Gm16685	Annotated_lncRNA	ENSMUST00000022861	ENSMUSG00000072664	Ugt3a1	-||UDP-glucuronosyl/UDP-glucosyltransferase	-0.951825	7.70724e-05
ENSMUST00000181286.1	ENSMUSG00000097804.1	Gm16685	Annotated_lncRNA	ENSMUST00000115096	ENSMUSG00000029765	Plxna4	Plexin-like fold||Immunoglobulin E-set||IPT domain||Plexin repeat||Sema domain||Plexin, cytoplasmic RasGAP domain||Rho GTPase activation protein	-0.950146	8.67426e-05
ENSMUST00000181286.1	ENSMUSG00000097804.1	Gm16685	Annotated_lncRNA	ENSMUST00000171797	ENSMUSG00000058799	Nap1l1	Nucleosome assembly protein (NAP)	-0.969875	1.51705e-05
ENSMUST00000181286.1	ENSMUSG00000097804.1	Gm16685	Annotated_lncRNA	ENSMUST00000111147	ENSMUSG00000027184	Caprin1	Cytoplasmic activation/proliferation-associated protein-1 C term	-0.958328	4.66959e-05
ENSMUST00000181286.1	ENSMUSG00000097804.1	Gm16685	Annotated_lncRNA	ENSMUST00000090380	ENSMUSG00000039704	Lmbrd2	LMBR1-like membrane protein	-0.964115	2.78285e-05
ENSMUST00000181286.1	ENSMUSG00000097804.1	Gm16685	Annotated_lncRNA	ENSMUST00000052727	ENSMUSG00000038451	Spsb2	SPRY domain||B30.2/SPRY domain||SOCS box domain||Concanavalin A-like lectin/glucanase domain	-0.963754	2.88104e-05
ENSMUST00000181286.1	ENSMUSG00000097804.1	Gm16685	Annotated_lncRNA	ENSMUST00000027670	ENSMUSG00000026415	Fcamr	Immunoglobulin-like domain||Immunoglobulin V-set domain||Immunoglobulin subtype	-0.984344	1.55706e-06
ENSMUST00000181286.1	ENSMUSG00000097804.1	Gm16685	Annotated_lncRNA	ENSMUST00000138505	ENSMUSG00000061589	Dot1l	Histone H3-K79 methyltransferase, metazoa||Histone methylation DOT1||Histone-lysine N-methyltransferase DOT1 domain||-||S-adenosyl-L-methionine-dependent methyltransferase	0.987027	8.08477e-07
ENSMUST00000181286.1	ENSMUSG00000097804.1	Gm16685	Annotated_lncRNA	ENSMUST00000200543	ENSMUSG00000028184	Adgrl2	GPCR, family 2-like||GPCR, family 2, secretin-like, conserved site||GPCR, family 2, latrophilin, C-terminal||D-galactoside/L-rhamnose binding SUEL lectin domain||GPCR, family 2, latrophilin||GPS motif||GPCR, family 2, secretin-like||Olfactomedin-like domain||GPCR, family 2, extracellular hormone receptor domain	-0.951787	7.72837e-05
ENSMUST00000181286.1	ENSMUSG00000097804.1	Gm16685	Annotated_lncRNA	ENSMUST00000072113	ENSMUSG00000062373	Tmem65	Transmembrane protein 65	0.97246	1.11108e-05
ENSMUST00000181286.1	ENSMUSG00000097804.1	Gm16685	Annotated_lncRNA	ENSMUST00000073109	ENSMUSG00000047409	Ctdspl	HAD-like domain||FCP1 homology domain||Dullard phosphatase domain, eukaryotic	-0.960572	3.85545e-05
ENSMUST00000181286.1	ENSMUSG00000097804.1	Gm16685	Annotated_lncRNA	ENSMUST00000068023	ENSMUSG00000054793	Cadm4	Neurexin/syndecan/glycophorin C||Immunoglobulin V-set domain||Immunoglobulin subtype||Immunoglobulin-like domain||Immunoglobulin subtype 2||CD80-like, immunoglobulin C2-set	0.952418	7.38462e-05
ENSMUST00000181286.1	ENSMUSG00000097804.1	Gm16685	Annotated_lncRNA	ENSMUST00000043335	ENSMUSG00000028573	Fggy	Carbohydrate kinase, FGGY, C-terminal||Carbohydrate kinase, FGGY-related||-||Carbohydrate kinase, FGGY, N-terminal||Carbohydrate kinase, FGGY	0.963717	2.89116e-05
ENSMUST00000181286.1	ENSMUSG00000097804.1	Gm16685	Annotated_lncRNA	ENSMUST00000115582	ENSMUSG00000036585	Fgf1	Fibroblast growth factor family||IL-1 family/FGF family||Cytokine, IL-1-like	-0.953466	6.83765e-05
ENSMUST00000181286.1	ENSMUSG00000097804.1	Gm16685	Annotated_lncRNA	ENSMUST00000021459	ENSMUSG00000021062	Rab15	Small GTPase superfamily, Rab type||Small GTPase superfamily, Ras type||Small GTPase superfamily||P-loop containing nucleoside triphosphate hydrolase||Small GTP-binding protein domain||Small GTPase superfamily, Rho type||Ran GTPase	0.974076	9.00495e-06
ENSMUST00000181286.1	ENSMUSG00000097804.1	Gm16685	Annotated_lncRNA	ENSMUST00000164566	ENSMUSG00000038528	BC021785	-||Major facilitator superfamily domain||Major facilitator superfamily	-0.975839	7.04984e-06
ENSMUST00000181286.1	ENSMUSG00000097804.1	Gm16685	Annotated_lncRNA	ENSMUST00000110952	ENSMUSG00000022106	Rcbtb2	BTB/POZ domain||POZ domain||-||Regulator of chromosome condensation 1/beta-lactamase-inhibitor protein II||Regulator of chromosome condensation, RCC1	-0.950855	8.2563e-05
ENSMUST00000181286.1	ENSMUSG00000097804.1	Gm16685	Annotated_lncRNA	ENSMUST00000047761	ENSMUSG00000022132	Cldn10	Claudin, conserved site||Claudin-10||PMP-22/EMP/MP20/Claudin superfamily	-0.983368	1.92224e-06
ENSMUST00000181286.1	ENSMUSG00000097804.1	Gm16685	Annotated_lncRNA	ENSMUST00000029876	ENSMUSG00000028222	Calb1	EF-hand domain pair||EF-hand domain||EF-Hand 1, calcium-binding site	0.953511	6.81508e-05
ENSMUST00000181286.1	ENSMUSG00000097804.1	Gm16685	Annotated_lncRNA	ENSMUST00000041407	ENSMUSG00000036169	Sostdc1	Sclerostin/Sclerostin domain-containing protein 1||Cystine knot, C-terminal	0.971914	1.18947e-05
ENSMUST00000181286.1	ENSMUSG00000097804.1	Gm16685	Annotated_lncRNA	ENSMUST00000076891	ENSMUSG00000024982	Zdhhc6	Variant SH3 domain||SH3 domain||Zinc finger, DHHC-type, palmitoyltransferase	-0.953319	6.91258e-05
ENSMUST00000181286.1	ENSMUSG00000097804.1	Gm16685	Annotated_lncRNA	ENSMUST00000027802	ENSMUSG00000026520	Pycr2	Pyrroline-5-carboxylate reductase, dimerisation domain||Pyrroline-5-carboxylate reductase||6-phosphogluconate dehydrogenase C-terminal domain-like||Pyrroline-5-carboxylate reductase, catalytic, N-terminal	0.965356	2.46324e-05
ENSMUST00000181286.1	ENSMUSG00000097804.1	Gm16685	Annotated_lncRNA	ENSMUST00000028995	ENSMUSG00000027495	Fam210b	Domain of unknown function DUF1279	0.969636	1.5592e-05
ENSMUST00000181286.1	ENSMUSG00000097804.1	Gm16685	Annotated_lncRNA	ENSMUST00000107022	ENSMUSG00000063730	Hsd3b2	3-beta hydroxysteroid dehydrogenase/isomerase	-0.953493	6.82418e-05
ENSMUST00000181286.1	ENSMUSG00000097804.1	Gm16685	Annotated_lncRNA	ENSMUST00000029400	ENSMUSG00000027820	Mme	Peptidase M13, C-terminal domain||Peptidase M13, N-terminal domain	-0.969292	1.62138e-05
ENSMUST00000181286.1	ENSMUSG00000097804.1	Gm16685	Annotated_lncRNA	ENSMUST00000194134	ENSMUSG00000027820	Mme	Peptidase M13, C-terminal domain||Peptidase M13, N-terminal domain	-0.973298	9.97902e-06
ENSMUST00000181286.1	ENSMUSG00000097804.1	Gm16685	Annotated_lncRNA	ENSMUST00000039742	ENSMUSG00000035878	Hykk	Aminoglycoside phosphotransferase||Protein kinase-like domain	-0.973448	9.7866e-06
ENSMUST00000181286.1	ENSMUSG00000097804.1	Gm16685	Annotated_lncRNA	ENSMUST00000008991	ENSMUSG00000067889	Sptbn2	Calponin homology domain||Spectrin, beta subunit||Pleckstrin homology domain, spectrin-type||Spectrin repeat||Pleckstrin homology domain||Spectrin/alpha-actinin||Actinin-type actin-binding domain, conserved site	0.967737	1.92444e-05
ENSMUST00000181286.1	ENSMUSG00000097804.1	Gm16685	Annotated_lncRNA	ENSMUST00000064536	ENSMUSG00000052593	Adam17	Peptidase M12B, propeptide||Peptidase M12B, ADAM/reprolysin||Disintegrin domain||-	-0.955395	5.90722e-05
ENSMUST00000181286.1	ENSMUSG00000097804.1	Gm16685	Annotated_lncRNA	ENSMUST00000019283	ENSMUSG00000019139	Isyna1	Myo-inositol-1-phosphate synthase||Myo-inositol-1-phosphate synthase, GAPDH-like	0.956668	5.34481e-05
ENSMUST00000181286.1	ENSMUSG00000097804.1	Gm16685	Annotated_lncRNA	ENSMUST00000114964	ENSMUSG00000061751	Kalrn	Spectrin repeat||Pleckstrin homology domain||Immunoglobulin-like domain||SH3 domain||Protein kinase domain||CRAL-TRIO lipid binding domain||Protein kinase-like domain||Spectrin/alpha-actinin||Fibronectin type III||Protein kinase, ATP binding site||Immunoglobulin subtype 2||Serine/threonine-protein kinase, active site||Serine/threonine/dual specificity protein kinase, catalytic domain||Dbl homolog…	0.952424	7.38128e-05
ENSMUST00000181286.1	ENSMUSG00000097804.1	Gm16685	Annotated_lncRNA	ENSMUST00000046675	ENSMUSG00000040795	Iqcc	IQ motif, EF-hand binding site	-0.962968	3.10318e-05
ENSMUST00000181286.1	ENSMUSG00000097804.1	Gm16685	Annotated_lncRNA	ENSMUST00000098639	ENSMUSG00000070709	1700049G17Rik	Zinc finger, C2H2||Zinc finger, C2H2-like||Krueppel-associated box	-0.964316	2.72914e-05
ENSMUST00000181286.1	ENSMUSG00000097804.1	Gm16685	Annotated_lncRNA	ENSMUST00000034478	ENSMUSG00000031995	St14	Low-density lipoprotein (LDL) receptor class A, conserved site||Peptidase S1, PA clan||Peptidase S1, trypsin family, active site||CUB domain||Peptidase S1A, matripase||Serine proteases, trypsin domain||-||Low-density lipoprotein (LDL) receptor class A repeat||SEA domain	0.962516	3.23654e-05
ENSMUST00000181286.1	ENSMUSG00000097804.1	Gm16685	Annotated_lncRNA	ENSMUST00000035987	ENSMUSG00000042724	Map3k9	Protein kinase domain||SH3 domain||Serine-threonine/tyrosine-protein kinase catalytic domain||Serine/threonine/dual specificity protein kinase, catalytic domain||Serine/threonine-protein kinase, active site||Protein kinase, ATP binding site||Protein kinase-like domain||Mitogen-activated protein (MAP) kinase kinase kinase, MLK1/MLK2/MLK4	0.964369	2.71525e-05
ENSMUST00000181286.1	ENSMUSG00000097804.1	Gm16685	Annotated_lncRNA	ENSMUST00000036541	ENSMUSG00000036093	Arl5a	Small GTPase superfamily, ARF type||Small GTPase superfamily, SAR1-type||P-loop containing nucleoside triphosphate hydrolase||Small GTP-binding protein domain||Small GTPase superfamily, ARF/SAR type	-0.971155	1.30485e-05
ENSMUST00000181286.1	ENSMUSG00000097804.1	Gm16685	Annotated_lncRNA	ENSMUST00000199406	ENSMUSG00000029472	Anapc5	-||Anaphase-promoting complex subunit 5	-0.957723	4.90807e-05
ENSMUST00000181286.1	ENSMUSG00000097804.1	Gm16685	Annotated_lncRNA	ENSMUST00000072406	ENSMUSG00000024127	Prepl	Alpha/Beta hydrolase fold||Peptidase S9A, prolyl oligopeptidase||Peptidase S9A, N-terminal domain||Peptidase S9, prolyl oligopeptidase, catalytic domain	-0.959259	4.31831e-05
ENSMUST00000181286.1	ENSMUSG00000097804.1	Gm16685	Annotated_lncRNA	ENSMUST00000099552	ENSMUSG00000074919	Gm10787	-	0.953322	6.91112e-05
ENSMUST00000181286.1	ENSMUSG00000097804.1	Gm16685	Annotated_lncRNA	ENSMUST00000099396	ENSMUSG00000054027	Nt5dc3	HAD-like domain||Purine 5'-nucleotidase||HAD-superfamily hydrolase, subfamily IG, 5'-nucleotidase	0.954743	6.21092e-05
ENSMUST00000181286.1	ENSMUSG00000097804.1	Gm16685	Annotated_lncRNA	ENSMUST00000080361	ENSMUSG00000054757	Akr1c20	NADP-dependent oxidoreductase domain||Aldo/keto reductase subgroup||Aldo/keto reductase, conserved site	0.960114	4.01281e-05
ENSMUST00000181286.1	ENSMUSG00000097804.1	Gm16685	Annotated_lncRNA	ENSMUST00000090433	ENSMUSG00000020823	Sec14l1	CRAL/TRIO, N-terminal domain||CRAL-TRIO lipid binding domain||PRELI/MSF1 domain||GOLD domain	0.958205	4.7174e-05
ENSMUST00000181286.1	ENSMUSG00000097804.1	Gm16685	Annotated_lncRNA	ENSMUST00000129829	ENSMUSG00000039997	Ifi203	Death-like domain||DAPIN domain||HIN-200/IF120x	-0.970192	1.46236e-05
ENSMUST00000181286.1	ENSMUSG00000097804.1	Gm16685	Annotated_lncRNA	ENSMUST00000065917	ENSMUSG00000058799	Nap1l1	Nucleosome assembly protein (NAP)	-0.958078	4.76685e-05
ENSMUST00000181286.1	ENSMUSG00000097804.1	Gm16685	Annotated_lncRNA	ENSMUST00000005692	ENSMUSG00000005553	Atp4a	HAD-like domain||Cation-transporting P-type ATPase, N-terminal||Gastric H+/K+-transporter P-type ATPase, N-terminal||P-type ATPase, subfamily IIC||P-type ATPase||-||P-type ATPase, A domain||P-type ATPase, cytoplasmic domain N||P-type ATPase, phosphorylation site||Cation-transporting P-type ATPase, C-terminal	0.956671	5.34349e-05
ENSMUST00000181286.1	ENSMUSG00000097804.1	Gm16685	Annotated_lncRNA	ENSMUST00000131487	ENSMUSG00000040596	Pogk	HTH CenpB-type DNA-binding domain||-||DDE superfamily endonuclease, CENP-B-like||Krueppel-associated box||Homeodomain-like||Brinker DNA-binding domain	0.965195	2.50318e-05
ENSMUST00000181286.1	ENSMUSG00000097804.1	Gm16685	Annotated_lncRNA	ENSMUST00000109313	ENSMUSG00000078937	Cpt1b	-||Acyltransferase ChoActase/COT/CPT	0.984191	1.61061e-06
[truncated: 11,407 more rows]
