# Supplementary material for: Altered Expression of Long Noncoding and Messenger RNAs in Diabetic Nephropathy following Treatment with Rosiglitazone
Source: Biomed Res Int. 2020 Jan 12;2020:1360843. doi: 10.1155/2020/1360843 (PMC6983290; doi:10.1155/2020/1360843)
Supplement: Supplementary Materials — Supplementary Table 1: significantly upregulated mRNAs in dbdb mice compared to the control group. Supplementary Table 2: significantly downregulated mRNAs in dbdb mice compared to the control group. Supplementary Table 3: significantly upregulated mRNAs in dbR mice compared to the dbdb group. Supplementary Table 4: significantly downregulated mRNAs in dbR mice compared to the dbdb group. Supplementary Table 5: mRNAs significantly upregulated by diabetic nephropathy yet reversed following rosiglitazone treatment. Supplementary Table 6: mRNAs significantly downregulated by diabetic nephropathy yet reversed following rosiglitazone treatment. Supplementary Table 7: significantly upregulated lncRNAs in dbdb mice compared to the control group. Supplementary Table 8: significantly downregulated lncRNAs in dbdb mice compared to the control group. Supplementary Table 9: significantly upregulated lncRNAs in dbR mice compared to the dbdb group. Supplementary Table 10: significantly downregulated lncRNAs in dbR mice compared to the dbdb group. Supplementary Table 11: lncRNAs significantly upregulated by diabetic nephropathy yet reversed following rosiglitazone treatment. Supplementary Table 12: lncRNAs significantly downregulated by diabetic nephropathy yet reversed following rosiglitazone treatment. Supplementary Table 13: differentially expressed lncRNAs colocated with genes. Supplementary Table 14: differentially expressed lncRNAs coexpressed with genes. Supplementary Table 15: top 20 significantly enriched GO terms associated with differentially expressed mRNAs in the kidneys of dbdb mice compared to the controls. Supplementary Table 16: top 20 significantly enriched GO terms associated with differentially expressed mRNAs in the kidneys of dbR mice compared to the dbdb group. Supplementary Table 17: top 20 significantly enriched GO terms associated with differentially expressed lncRNAs coexpressed with genes in the kidneys of dbdb mice compared to the controls. Supplementa [file 1360843.f1.zip › 1360843.f1/Supplementary Table 15.xls]

## Sheet: Table S15 mRNA dbdb_vs_Control.
Supplementary Table 15 Top 20 significantly enriched GO terms associated with differentially expressed mRNAs in the kidneys of dbdb mice compared to the controls
GO accession	GO term	Term type	Over represented pValue	Corrected_pValue	Number of genes	Background genes	Percent of genes (%)
GO:0044710	single-organism metabolic process	biological_process	1.26e-32	5.86e-29	540	2074	26.04
GO:0044281	small molecule metabolic process	biological_process	1.2e-27	3.7e-24	390	2074	18.8
GO:0010033	response to organic substance	biological_process	2.07e-23	3.83e-20	397	2074	19.14
GO:0019752	carboxylic acid metabolic process	biological_process	2.73e-23	4.6e-20	189	2074	9.11
GO:0006082	organic acid metabolic process	biological_process	6.42e-23	9.92e-20	203	2074	9.79
GO:0051179	localization	biological_process	1.25e-22	1.78e-19	742	2074	35.78
GO:0042221	response to chemical stimulus	biological_process	5.37e-22	7.1e-19	539	2074	25.99
GO:0043436	oxoacid metabolic process	biological_process	2.01e-21	2.48e-18	196	2074	9.45
GO:0055114	oxidation-reduction process	biological_process	3.37e-21	3.9e-18	197	2074	9.5
GO:0006629	lipid metabolic process	biological_process	8.41e-21	9.17e-18	226	2074	10.9
GO:1901700	response to oxygen-containing compound	biological_process	9.44e-21	9.72e-18	255	2074	12.3
GO:0044765	single-organism transport	biological_process	4.02e-19	3.72e-16	503	2074	24.25
GO:0032787	monocarboxylic acid metabolic process	biological_process	4.64e-19	4.1e-16	122	2074	5.88
GO:0044255	cellular lipid metabolic process	biological_process	4.8e-18	3.86e-15	170	2074	8.2
GO:0070887	cellular response to chemical stimulus	biological_process	5.98e-18	4.62e-15	341	2074	16.44
GO:0006810	transport	biological_process	1.03e-17	7.61e-15	582	2074	28.06
GO:0051234	establishment of localization	biological_process	2.77e-17	1.98e-14	596	2074	28.74
GO:0008610	lipid biosynthetic process	biological_process	3e-17	2.06e-14	118	2074	5.69
GO:0009725	response to hormone stimulus	biological_process	3.9e-17	2.58e-14	169	2074	8.15
GO:0009605	response to external stimulus	biological_process	8.8e-17	5.62e-14	252	2074	12.15
GO:0043230	extracellular organelle	cellular_component	7.32e-35	6.78e-31	461	2074	22.23
GO:0065010	extracellular membrane-bounded organelle	cellular_component	7.32e-35	6.78e-31	461	2074	22.23
GO:0070062	extracellular vesicular exosome	cellular_component	1.64e-34	1.01e-30	459	2074	22.13
GO:0044421	extracellular region part	cellular_component	5.21e-31	1.93e-27	573	2074	27.63
GO:0031988	membrane-bounded vesicle	cellular_component	5.63e-27	1.49e-23	523	2074	25.22
GO:0005576	extracellular region	cellular_component	2.23e-26	5.17e-23	612	2074	29.51
GO:0031982	vesicle	cellular_component	1.23e-25	2.53e-22	534	2074	25.75
GO:0044444	cytoplasmic part	cellular_component	5.44e-19	4.58e-16	886	2074	42.72
GO:0016324	apical plasma membrane	cellular_component	2e-15	1.09e-12	78	2074	3.76
GO:0009986	cell surface	cellular_component	5.7e-15	2.64e-12	149	2074	7.18
GO:0043227	membrane-bounded organelle	cellular_component	2.44e-14	1e-11	1331	2074	64.18
GO:0016323	basolateral plasma membrane	cellular_component	3.42e-14	1.37e-11	62	2074	2.99
GO:0045177	apical part of cell	cellular_component	5.24e-14	1.98e-11	89	2074	4.29
GO:0005783	endoplasmic reticulum	cellular_component	1.56e-13	4.97e-11	238	2074	11.48
GO:0016020	membrane	cellular_component	2.87e-13	8.59e-11	1101	2074	53.09
GO:0005737	cytoplasm	cellular_component	8.15e-13	2.32e-10	1170	2074	56.41
GO:0043226	organelle	cellular_component	1.31e-12	3.62e-10	1396	2074	67.31
GO:0044459	plasma membrane part	cellular_component	7.78e-12	1.92e-09	336	2074	16.2
GO:0071944	cell periphery	cellular_component	1e-11	2.38e-09	617	2074	29.75
GO:0044425	membrane part	cellular_component	5.12e-11	1.04e-08	845	2074	40.74
GO:0016491	oxidoreductase activity	molecular_function	1.55e-19	1.51e-16	161	2074	7.76
GO:0022804	active transmembrane transporter activity	molecular_function	2.47e-15	1.31e-12	97	2074	4.68
GO:0015291	secondary active transmembrane transporter activity	molecular_function	2.31e-14	9.74e-12	72	2074	3.47
GO:0003824	catalytic activity	molecular_function	3.48e-14	1.37e-11	750	2074	36.16
GO:0022857	transmembrane transporter activity	molecular_function	1.81e-11	4.04e-09	171	2074	8.24
GO:0005215	transporter activity	molecular_function	2.51e-11	5.47e-09	204	2074	9.84
GO:0005506	iron ion binding	molecular_function	6.02e-10	9.78e-08	52	2074	2.51
GO:0008509	anion transmembrane transporter activity	molecular_function	6.61e-10	1.05e-07	68	2074	3.28
GO:0020037	heme binding	molecular_function	9.89e-10	1.51e-07	45	2074	2.17
GO:0022892	substrate-specific transporter activity	molecular_function	2.13e-09	3.1e-07	173	2074	8.34
GO:0022891	substrate-specific transmembrane transporter activity	molecular_function	4.69e-09	6.58e-07	150	2074	7.23
GO:0046906	tetrapyrrole binding	molecular_function	5.48e-09	7.57e-07	45	2074	2.17
GO:0008514	organic anion transmembrane transporter activity	molecular_function	9.31e-09	1.21e-06	45	2074	2.17
GO:0015347	sodium-independent organic anion transmembrane transporter activity	molecular_function	9.38e-09	1.21e-06	16	2074	0.77
GO:0015075	ion transmembrane transporter activity	molecular_function	5.42e-08	5.64e-06	138	2074	6.65
GO:0016614	oxidoreductase activity, acting on CH-OH group of donors	molecular_function	6.19e-08	6.33e-06	37	2074	1.78
GO:0016616	oxidoreductase activity, acting on the CH-OH group of donors, NAD or NADP as acceptor	molecular_function	1.38e-07	1.2554e-05	32	2074	1.54
GO:0042802	identical protein binding	molecular_function	1.73e-07	1.516e-05	179	2074	8.63
GO:0015297	antiporter activity	molecular_function	1.75e-07	1.5261e-05	30	2074	1.45
GO:0016705	oxidoreductase activity, acting on paired donors, with incorporation or reduction of molecular oxygen	molecular_function	2.41e-07	2.0562e-05	48	2074	2.31
Number of genes: Number of corresponding genes associated with differential mRNAs enriched in the GO term
Background genes: Number of corresponding genes associated with the differential mRNAs annotated with GO
Percent of genes: Number of genes / Background genes
