# Supplementary material for: Altered Expression of Long Noncoding and Messenger RNAs in Diabetic Nephropathy following Treatment with Rosiglitazone
Source: Biomed Res Int. 2020 Jan 12;2020:1360843. doi: 10.1155/2020/1360843 (PMC6983290; doi:10.1155/2020/1360843)
Supplement: Supplementary Materials — Supplementary Table 1: significantly upregulated mRNAs in dbdb mice compared to the control group. Supplementary Table 2: significantly downregulated mRNAs in dbdb mice compared to the control group. Supplementary Table 3: significantly upregulated mRNAs in dbR mice compared to the dbdb group. Supplementary Table 4: significantly downregulated mRNAs in dbR mice compared to the dbdb group. Supplementary Table 5: mRNAs significantly upregulated by diabetic nephropathy yet reversed following rosiglitazone treatment. Supplementary Table 6: mRNAs significantly downregulated by diabetic nephropathy yet reversed following rosiglitazone treatment. Supplementary Table 7: significantly upregulated lncRNAs in dbdb mice compared to the control group. Supplementary Table 8: significantly downregulated lncRNAs in dbdb mice compared to the control group. Supplementary Table 9: significantly upregulated lncRNAs in dbR mice compared to the dbdb group. Supplementary Table 10: significantly downregulated lncRNAs in dbR mice compared to the dbdb group. Supplementary Table 11: lncRNAs significantly upregulated by diabetic nephropathy yet reversed following rosiglitazone treatment. Supplementary Table 12: lncRNAs significantly downregulated by diabetic nephropathy yet reversed following rosiglitazone treatment. Supplementary Table 13: differentially expressed lncRNAs colocated with genes. Supplementary Table 14: differentially expressed lncRNAs coexpressed with genes. Supplementary Table 15: top 20 significantly enriched GO terms associated with differentially expressed mRNAs in the kidneys of dbdb mice compared to the controls. Supplementary Table 16: top 20 significantly enriched GO terms associated with differentially expressed mRNAs in the kidneys of dbR mice compared to the dbdb group. Supplementary Table 17: top 20 significantly enriched GO terms associated with differentially expressed lncRNAs coexpressed with genes in the kidneys of dbdb mice compared to the controls. Supplementa [file 1360843.f1.zip › 1360843.f1/Supplementary Table 16.xls]

## Sheet: Table S16 mRNA dbR_vs_dbdb.GO_E
Supplementary Table 16 Top 20 significantly enriched GO terms associated with differentially expressed mRNAs in the kidneys of dbR mice compared to the dbdb group
GO accession	GO term	Term type	Over represented pValue	Corrected_pValue	Number of genes	Background genes	Percent of genes (%)
GO:0010033	response to organic substance	biological_process	4.73e-26	1.97e-22	160	587	27.26
GO:0006950	response to stress	biological_process	5.14e-22	1.12e-18	176	587	29.98
GO:0070887	cellular response to chemical stimulus	biological_process	2.34e-20	4.34e-17	135	587	23
GO:0001944	vasculature development	biological_process	9.8e-20	1.65e-16	64	587	10.9
GO:0001568	blood vessel development	biological_process	2.81e-19	4e-16	62	587	10.56
GO:0042221	response to chemical stimulus	biological_process	3.12e-19	4.12e-16	201	587	34.24
GO:0051239	regulation of multicellular organismal process	biological_process	3.41e-18	3.95e-15	148	587	25.21
GO:0006952	defense response	biological_process	5.64e-18	6.15e-15	91	587	15.5
GO:0009611	response to wounding	biological_process	8.59e-18	8.84e-15	76	587	12.95
GO:0071310	cellular response to organic substance	biological_process	6.26e-17	5.8e-14	109	587	18.57
GO:0002376	immune system process	biological_process	9.86e-17	8.7e-14	122	587	20.78
GO:0048518	positive regulation of biological process	biological_process	1.06e-16	8.96e-14	215	587	36.63
GO:1901700	response to oxygen-containing compound	biological_process	1.23e-16	9.87e-14	96	587	16.35
GO:0072358	cardiovascular system development	biological_process	1.4e-16	1.04e-13	77	587	13.12
GO:0072359	circulatory system development	biological_process	1.4e-16	1.04e-13	77	587	13.12
GO:0048519	negative regulation of biological process	biological_process	4.38e-16	3.12e-13	193	587	32.88
GO:0050896	response to stimulus	biological_process	7.72e-16	5.3e-13	326	587	55.54
GO:0009605	response to external stimulus	biological_process	1.14e-15	7.25e-13	97	587	16.52
GO:0048523	negative regulation of cellular process	biological_process	2.85e-15	1.76e-12	178	587	30.32
GO:0048731	system development	biological_process	4.8e-15	2.87e-12	197	587	33.56
GO:0044421	extracellular region part	cellular_component	2.81e-31	5.21e-27	219	587	37.31
GO:0005576	extracellular region	cellular_component	1.19e-28	1.1e-24	232	587	39.52
GO:0043230	extracellular organelle	cellular_component	5.3e-26	1.97e-22	167	587	28.45
GO:0065010	extracellular membrane-bounded organelle	cellular_component	5.3e-26	1.97e-22	167	587	28.45
GO:0070062	extracellular vesicular exosome	cellular_component	3.25e-25	1e-21	165	587	28.11
GO:0031012	extracellular matrix	cellular_component	5.93e-23	1.57e-19	59	587	10.05
GO:0005578	proteinaceous extracellular matrix	cellular_component	5.45e-22	1.12e-18	53	587	9.03
GO:0031982	vesicle	cellular_component	1.99e-19	3.07e-16	182	587	31.01
GO:0031988	membrane-bounded vesicle	cellular_component	1.49e-18	1.84e-15	175	587	29.81
GO:0005615	extracellular space	cellular_component	3.06e-17	2.98e-14	94	587	16.01
GO:0044420	extracellular matrix part	cellular_component	8.97e-16	5.94e-13	32	587	5.45
GO:0009986	cell surface	cellular_component	9.63e-15	5.25e-12	63	587	10.73
GO:0022626	cytosolic ribosome	cellular_component	5.93e-13	1.93e-10	20	587	3.41
GO:0044391	ribosomal subunit	cellular_component	1.93e-10	3.66e-08	22	587	3.75
GO:0042611	MHC protein complex	cellular_component	4.12e-10	7.55e-08	12	587	2.04
GO:0005604	basement membrane	cellular_component	6.61e-10	1.18e-07	18	587	3.07
GO:0044445	cytosolic part	cellular_component	7.88e-10	1.37e-07	25	587	4.26
GO:0042613	MHC class II protein complex	cellular_component	9.3e-10	1.55e-07	7	587	1.19
GO:0043227	membrane-bounded organelle	cellular_component	1.34e-09	2.19e-07	386	587	65.76
GO:0022625	cytosolic large ribosomal subunit	cellular_component	2.17e-09	3.41e-07	13	587	2.21
GO:0005515	protein binding	molecular_function	2.34e-13	8.86e-11	421	587	71.72
GO:0019838	growth factor binding	molecular_function	5.74e-13	1.9e-10	22	587	3.75
GO:1901681	sulfur compound binding	molecular_function	4.54e-12	1.18e-09	26	587	4.43
GO:0097367	carbohydrate derivative binding	molecular_function	1.5e-11	3.38e-09	27	587	4.6
GO:0005539	glycosaminoglycan binding	molecular_function	1.57e-11	3.51e-09	25	587	4.26
GO:0003735	structural constituent of ribosome	molecular_function	1.66e-11	3.65e-09	24	587	4.09
GO:0005488	binding	molecular_function	6.34e-11	1.25e-08	495	587	84.33
GO:0005178	integrin binding	molecular_function	7.52e-10	1.31e-07	17	587	2.9
GO:0008201	heparin binding	molecular_function	8.98e-10	1.51e-07	20	587	3.41
GO:0005102	receptor binding	molecular_function	1.55e-09	2.49e-07	80	587	13.63
GO:0005198	structural molecule activity	molecular_function	8.03e-09	1.12e-06	41	587	6.98
GO:0048407	platelet-derived growth factor binding	molecular_function	1.41e-08	1.85e-06	7	587	1.19
GO:0038085	vascular endothelial growth factor binding	molecular_function	2.37e-08	2.92e-06	5	587	0.85
GO:0032403	protein complex binding	molecular_function	3.98e-08	4.6e-06	39	587	6.64
GO:0046983	protein dimerization activity	molecular_function	1.23e-07	1.2611e-05	63	587	10.73
GO:0042802	identical protein binding	molecular_function	2.96e-07	2.8394e-05	64	587	10.9
GO:0005201	extracellular matrix structural constituent	molecular_function	3.46e-07	3.2748e-05	9	587	1.53
GO:0003823	antigen binding	molecular_function	1.73e-06	0.00013932	12	587	2.04
GO:0001948	glycoprotein binding	molecular_function	3.06e-06	0.00023715	14	587	2.39
GO:0046977	TAP binding	molecular_function	4.25e-06	0.00031904	5	587	0.85
Number of genes: Number of corresponding genes associated with the differential mRNAs enriched in the GO term
Background genes: Number of corresponding genes associated with the differential mRNAs annotated with GO
Percent of genes: Number of genes / Background genes
