# Supplementary material for: Altered Expression of Long Noncoding and Messenger RNAs in Diabetic Nephropathy following Treatment with Rosiglitazone
Source: Biomed Res Int. 2020 Jan 12;2020:1360843. doi: 10.1155/2020/1360843 (PMC6983290; doi:10.1155/2020/1360843)
Supplement: Supplementary Materials — Supplementary Table 1: significantly upregulated mRNAs in dbdb mice compared to the control group. Supplementary Table 2: significantly downregulated mRNAs in dbdb mice compared to the control group. Supplementary Table 3: significantly upregulated mRNAs in dbR mice compared to the dbdb group. Supplementary Table 4: significantly downregulated mRNAs in dbR mice compared to the dbdb group. Supplementary Table 5: mRNAs significantly upregulated by diabetic nephropathy yet reversed following rosiglitazone treatment. Supplementary Table 6: mRNAs significantly downregulated by diabetic nephropathy yet reversed following rosiglitazone treatment. Supplementary Table 7: significantly upregulated lncRNAs in dbdb mice compared to the control group. Supplementary Table 8: significantly downregulated lncRNAs in dbdb mice compared to the control group. Supplementary Table 9: significantly upregulated lncRNAs in dbR mice compared to the dbdb group. Supplementary Table 10: significantly downregulated lncRNAs in dbR mice compared to the dbdb group. Supplementary Table 11: lncRNAs significantly upregulated by diabetic nephropathy yet reversed following rosiglitazone treatment. Supplementary Table 12: lncRNAs significantly downregulated by diabetic nephropathy yet reversed following rosiglitazone treatment. Supplementary Table 13: differentially expressed lncRNAs colocated with genes. Supplementary Table 14: differentially expressed lncRNAs coexpressed with genes. Supplementary Table 15: top 20 significantly enriched GO terms associated with differentially expressed mRNAs in the kidneys of dbdb mice compared to the controls. Supplementary Table 16: top 20 significantly enriched GO terms associated with differentially expressed mRNAs in the kidneys of dbR mice compared to the dbdb group. Supplementary Table 17: top 20 significantly enriched GO terms associated with differentially expressed lncRNAs coexpressed with genes in the kidneys of dbdb mice compared to the controls. Supplementa [file 1360843.f1.zip › 1360843.f1/Supplementary Table 17.xls]

## Sheet: Table S17 lncRNA dbdb_vs_Contro
Supplementary Table 17 Top 20 significantly enriched GO terms associated with differentially expressed lncRNAs co-expressed with genes in the kidneys of dbdb mice compared to the controls
GO accession	GO term	Term type	Over represented pValue	Corrected_pValue	Number of genes	Background genes	Percent of genes (%)
GO:0044710	single-organism metabolic process	biological_process	2.13e-31	3.98e-28	742	12264	6.05
GO:0008152	metabolic process	biological_process	1.02e-26	1.72e-23	2014	12264	16.42
GO:0044281	small molecule metabolic process	biological_process	4e-25	6.18e-22	525	12264	4.28
GO:0071704	organic substance metabolic process	biological_process	1.33e-22	1.65e-19	1799	12264	14.67
GO:0044237	cellular metabolic process	biological_process	2.34e-22	2.71e-19	1717	12264	14
GO:0006629	lipid metabolic process	biological_process	7.11e-20	6.59e-17	302	12264	2.46
GO:0044255	cellular lipid metabolic process	biological_process	9.66e-20	8.52e-17	233	12264	1.9
GO:0044238	primary metabolic process	biological_process	9.64e-19	8.12e-16	1721	12264	14.03
GO:0008610	lipid biosynthetic process	biological_process	8.62e-18	6.94e-15	156	12264	1.27
GO:0009987	cellular process	biological_process	3.34e-17	2.47e-14	2478	12264	20.21
GO:0006082	organic acid metabolic process	biological_process	1.33e-16	8.83e-14	251	12264	2.05
GO:0019752	carboxylic acid metabolic process	biological_process	4.3e-16	2.66e-13	229	12264	1.87
GO:0043436	oxoacid metabolic process	biological_process	4.52e-16	2.7e-13	245	12264	2
GO:0051234	establishment of localization	biological_process	9.69e-16	5.61e-13	838	12264	6.83
GO:0006810	transport	biological_process	1.36e-15	7.64e-13	813	12264	6.63
GO:0009056	catabolic process	biological_process	4.91e-14	2.6e-11	485	12264	3.95
GO:0051179	localization	biological_process	5.34e-14	2.75e-11	1000	12264	8.15
GO:0044765	single-organism transport	biological_process	8.63e-14	4.21e-11	677	12264	5.52
GO:1901575	organic substance catabolic process	biological_process	1.06e-13	5.05e-11	439	12264	3.58
GO:0055114	oxidation-reduction process	biological_process	1.47e-13	6.8e-11	237	12264	1.93
GO:0043227	membrane-bounded organelle	cellular_component	1.3e-43	2.4e-39	2111	12264	17.21
GO:0043226	organelle	cellular_component	5.86e-39	5.43e-35	2204	12264	17.97
GO:0070062	extracellular vesicular exosome	cellular_component	8.61e-38	5.32e-34	638	12264	5.2
GO:0043230	extracellular organelle	cellular_component	2.15e-37	7.95e-34	638	12264	5.2
GO:0065010	extracellular membrane-bounded organelle	cellular_component	2.15e-37	7.95e-34	638	12264	5.2
GO:0031988	membrane-bounded vesicle	cellular_component	2.21e-33	6.83e-30	754	12264	6.15
GO:0044444	cytoplasmic part	cellular_component	1.19e-32	3.15e-29	1351	12264	11.02
GO:0031982	vesicle	cellular_component	7.01e-32	1.62e-28	772	12264	6.29
GO:0005737	cytoplasm	cellular_component	2.15e-31	3.98e-28	1832	12264	14.94
GO:0043231	intracellular membrane-bounded organelle	cellular_component	1.45e-23	2.07e-20	1843	12264	15.03
GO:0044424	intracellular part	cellular_component	3.6e-23	4.77e-20	2222	12264	18.12
GO:0044421	extracellular region part	cellular_component	3.83e-22	4.17e-19	752	12264	6.13
GO:0005622	intracellular	cellular_component	2.33e-20	2.4e-17	2294	12264	18.71
GO:0043229	intracellular organelle	cellular_component	6.65e-20	6.48e-17	1963	12264	16.01
GO:0005576	extracellular region	cellular_component	1.9e-17	1.46e-14	806	12264	6.57
GO:0044464	cell part	ellular_component	5.46e-17	3.81e-14	2564	12264	20.91
GO:0005623	cell	cellular_component	5.55e-17	3.81e-14	2570	12264	20.96
GO:0031090	organelle membrane	cellular_component	1.67e-14	9.09e-12	552	12264	4.5
GO:0044446	intracellular organelle part	cellular_component	6.49e-14	3.25e-11	1318	12264	10.75
GO:0044422	organelle part	cellular_component	4.83e-13	2.13e-10	1335	12264	10.89
GO:0003824	catalytic activity	molecular_function	1.73e-16	1.1e-13	1100	12264	8.97
GO:0005515	protein binding	molecular_function	2.82e-12	1.09e-09	2037	12264	16.61
GO:0016491	oxidoreductase activity	molecular_function	6.53e-11	2.12e-08	185	12264	1.51
GO:0005488	binding	molecular_function	2.64e-08	6.534e-06	2462	12264	20.08
GO:0022804	active transmembrane transporter activity	molecular_function	3.79e-08	8.9e-06	106	12264	0.86
GO:0015291	secondary active transmembrane transporter activity	molecular_function	1.09e-07	2.3719e-05	76	12264	0.62
GO:0008509	anion transmembrane transporter activity	molecular_function	1.53e-07	3.1485e-05	83	12264	0.68
GO:0019899	enzyme binding	molecular_function	2.86e-07	5.5207e-05	341	12264	2.78
GO:0005496	steroid binding	molecular_function	1.43e-06	0.00024575	29	12264	0.24
GO:0022892	substrate-specific transporter activity	molecular_function	2.42e-06	0.00039385	226	12264	1.84
GO:0008514	organic anion transmembrane transporter activity	molecular_function	3.76e-06	0.0005662	52	12264	0.42
GO:0048037	cofactor binding	molecular_function	4.29e-06	0.00064128	74	12264	0.6
GO:0005215	transporter activity	molecular_function	6.33e-06	0.00091696	255	12264	2.08
GO:0016614	oxidoreductase activity, acting on CH-OH group of donors	molecular_function	6.44e-06	0.00092508	43	12264	0.35
GO:0016616	oxidoreductase activity, acting on the CH-OH group of donors, NAD or NADP as acceptor	molecular_function	8.57e-06	0.0011844	37	12264	0.3
GO:0043167	ion binding	molecular_function	8.66e-06	0.0011889	1081	12264	8.81
GO:0022857	transmembrane transporter activity	molecular_function	2.4284e-05	0.0028842	206	12264	1.68
GO:0000287	magnesium ion binding	molecular_function	3.2913e-05	0.0036516	55	12264	0.45
GO:0016740	transferase activity	molecular_function	4.5712e-05	0.0046793	366	12264	2.98
GO:0015075	ion transmembrane transporter activity	molecular_function	4.9744e-05	0.0049315	178	12264	1.45
Number of genes: Number of corresponding genes associated with the differential lncRNAs co-expressed mRNAs enriched in the GO term
Background genes: Number of corresponding genes associated with the differential lncRNAs co-expressed mRNAs annotated with GO
Percent of genes: Number of genes / Background genes
