# Supplementary material for: Altered Expression of Long Noncoding and Messenger RNAs in Diabetic Nephropathy following Treatment with Rosiglitazone
Source: Biomed Res Int. 2020 Jan 12;2020:1360843. doi: 10.1155/2020/1360843 (PMC6983290; doi:10.1155/2020/1360843)
Supplement: Supplementary Materials — Supplementary Table 1: significantly upregulated mRNAs in dbdb mice compared to the control group. Supplementary Table 2: significantly downregulated mRNAs in dbdb mice compared to the control group. Supplementary Table 3: significantly upregulated mRNAs in dbR mice compared to the dbdb group. Supplementary Table 4: significantly downregulated mRNAs in dbR mice compared to the dbdb group. Supplementary Table 5: mRNAs significantly upregulated by diabetic nephropathy yet reversed following rosiglitazone treatment. Supplementary Table 6: mRNAs significantly downregulated by diabetic nephropathy yet reversed following rosiglitazone treatment. Supplementary Table 7: significantly upregulated lncRNAs in dbdb mice compared to the control group. Supplementary Table 8: significantly downregulated lncRNAs in dbdb mice compared to the control group. Supplementary Table 9: significantly upregulated lncRNAs in dbR mice compared to the dbdb group. Supplementary Table 10: significantly downregulated lncRNAs in dbR mice compared to the dbdb group. Supplementary Table 11: lncRNAs significantly upregulated by diabetic nephropathy yet reversed following rosiglitazone treatment. Supplementary Table 12: lncRNAs significantly downregulated by diabetic nephropathy yet reversed following rosiglitazone treatment. Supplementary Table 13: differentially expressed lncRNAs colocated with genes. Supplementary Table 14: differentially expressed lncRNAs coexpressed with genes. Supplementary Table 15: top 20 significantly enriched GO terms associated with differentially expressed mRNAs in the kidneys of dbdb mice compared to the controls. Supplementary Table 16: top 20 significantly enriched GO terms associated with differentially expressed mRNAs in the kidneys of dbR mice compared to the dbdb group. Supplementary Table 17: top 20 significantly enriched GO terms associated with differentially expressed lncRNAs coexpressed with genes in the kidneys of dbdb mice compared to the controls. Supplementa [file 1360843.f1.zip › 1360843.f1/Supplementary Table 18.xls]

## Sheet: Table S18 lncRNA dbR_vs_dbdb.GO
Supplementary Table 18 Top 20 significantly enriched GO terms associated with differentially expressed lncRNAs co-expressed with genes in the kidneys of dbR mice compared to the dbdb group
GO accession	GO term	Term type	Over represented pValue	Corrected_pValue	Number of genes	Background genes	Percent of genes (%)
GO:0006412	translation	biological_process	9.79e-09	1.1333e-05	29	387	7.49
GO:1901576	organic substance biosynthetic process	biological_process	2.68e-08	2.9201e-05	140	387	36.18
GO:0009058	biosynthetic process	biological_process	3.55e-08	3.6592e-05	141	387	36.43
GO:0009605	response to external stimulus	biological_process	7.38e-08	7.1937e-05	56	387	14.47
GO:0044249	cellular biosynthetic process	biological_process	2.75e-07	0.00022115	134	387	34.63
GO:0048518	positive regulation of biological process	biological_process	3.14e-06	0.0020756	120	387	31.01
GO:0010467	gene expression	biological_process	3.39e-06	0.0021123	122	387	31.52
GO:0034645	cellular macromolecule biosynthetic process	biological_process	3.5e-06	0.0021123	113	387	29.2
GO:0042274	ribosomal small subunit biogenesis	biological_process	5.87e-06	0.003297	7	387	1.81
GO:0010033	response to organic substance	biological_process	7.23e-06	0.0037201	72	387	18.6
GO:0044238	primary metabolic process	biological_process	7.57e-06	0.0037898	212	387	54.78
GO:0008630	intrinsic apoptotic signaling pathway in response to DNA damage	biological_process	1.2374e-05	0.0056613	10	387	2.58
GO:0009059	macromolecule biosynthetic process	biological_process	1.2486e-05	0.0056613	113	387	29.2
GO:0071704	organic substance metabolic process	biological_process	1.3317e-05	0.0058748	217	387	56.07
GO:0048522	positive regulation of cellular process	biological_process	1.6089e-05	0.0069324	108	387	27.91
GO:0048519	negative regulation of biological process	biological_process	2.6808e-05	0.010798	104	387	26.87
GO:0014070	response to organic cyclic compound	biological_process	2.7471e-05	0.010829	34	387	8.79
GO:0008152	metabolic process	biological_process	2.8557e-05	0.011023	237	387	61.24
GO:0019886	antigen processing and presentation of exogenous peptide antigen via MHC class II	biological_process	5.0291e-05	0.018826	4	387	1.03
GO:0034341	response to interferon-gamma	biological_process	5.0805e-05	0.018826	8	387	2.07
GO:0022626	cytosolic ribosome	cellular_component	1.33e-15	2.47e-11	18	387	4.65
GO:0043226	organelle	cellular_component	9.24e-15	8.56e-11	283	387	73.13
GO:0043227	membrane-bounded organelle	cellular_component	1.5e-13	9.26e-10	267	387	68.99
GO:0022627	cytosolic small ribosomal subunit	cellular_component	3.49e-13	1.29e-09	11	387	2.84
GO:0044391	ribosomal subunit	cellular_component	1.45e-12	4.49e-09	19	387	4.91
GO:0005737	cytoplasm	cellular_component	2.16e-12	5.72e-09	239	387	61.76
GO:0005840	ribosome	cellular_component	3.75e-12	8.69e-09	22	387	5.68
GO:0043229	intracellular organelle	cellular_component	6.28e-12	1.29e-08	260	387	67.18
GO:0044424	intracellular part	cellular_component	1e-11	1.85e-08	285	387	73.64
GO:0005622	intracellular	cellular_component	2.54e-11	4.08e-08	293	387	75.71
GO:0044445	cytosolic part	cellular_component	2.64e-11	4.08e-08	21	387	5.43
GO:0044444	cytoplasmic part	cellular_component	5.39e-11	7.69e-08	179	387	46.25
GO:0043231	intracellular membrane-bounded organelle	cellular_component	6.08e-10	8.05e-07	237	387	61.24
GO:0015935	small ribosomal subunit	cellular_component	2.61e-09	3.22e-06	11	387	2.84
GO:0044464	cell part	cellular_component	1.13e-07	0.00010442	316	387	81.65
GO:0005623	cell	cellular_component	1.82e-07	0.00015741	316	387	81.65
GO:0030529	ribonucleoprotein complex	cellular_component	1.87e-07	0.00015741	32	387	8.27
GO:0044446	intracellular organelle part	cellular_component	1.11e-06	0.00085735	171	387	44.19
GO:0005829	cytosol	cellular_component	1.17e-06	0.00086806	60	387	15.5
GO:0044422	organelle part	cellular_component	3.53e-06	0.0021123	173	387	44.7
GO:0003735	structural constituent of ribosome	molecular_function	3.21e-13	1.29e-09	20	387	5.17
GO:0004602	glutathione peroxidase activity	molecular_function	1.94e-06	0.0013807	5	387	1.29
GO:0005198	structural molecule activity	molecular_function	2.4e-06	0.0016441	26	387	6.72
GO:0004601	peroxidase activity	molecular_function	1.8964e-05	0.0079855	6	387	1.55
GO:0016684	oxidoreductase activity, acting on peroxide as acceptor	molecular_function	2.2861e-05	0.0094126	6	387	1.55
GO:0016209	antioxidant activity	molecular_function	6.6357e-05	0.021955	7	387	1.81
GO:0097159	organic cyclic compound binding	molecular_function	9.3319e-05	0.025863	128	387	33.07
GO:1901363	heterocyclic compound binding	molecular_function	0.00019488	0.048159	125	387	32.3
Number of genes: Number of corresponding genes associated with the differential lncRNAs co-expressed mRNAs enriched in the GO term
Background genes: Number of corresponding genes associated with the differential lncRNAs co-expressed mRNAs annotated with GO
Percent of genes: Number of genes / Background genes
