# Supplementary material for: Altered Expression of Long Noncoding and Messenger RNAs in Diabetic Nephropathy following Treatment with Rosiglitazone
Source: Biomed Res Int. 2020 Jan 12;2020:1360843. doi: 10.1155/2020/1360843 (PMC6983290; doi:10.1155/2020/1360843)
Supplement: Supplementary Materials — Supplementary Table 1: significantly upregulated mRNAs in dbdb mice compared to the control group. Supplementary Table 2: significantly downregulated mRNAs in dbdb mice compared to the control group. Supplementary Table 3: significantly upregulated mRNAs in dbR mice compared to the dbdb group. Supplementary Table 4: significantly downregulated mRNAs in dbR mice compared to the dbdb group. Supplementary Table 5: mRNAs significantly upregulated by diabetic nephropathy yet reversed following rosiglitazone treatment. Supplementary Table 6: mRNAs significantly downregulated by diabetic nephropathy yet reversed following rosiglitazone treatment. Supplementary Table 7: significantly upregulated lncRNAs in dbdb mice compared to the control group. Supplementary Table 8: significantly downregulated lncRNAs in dbdb mice compared to the control group. Supplementary Table 9: significantly upregulated lncRNAs in dbR mice compared to the dbdb group. Supplementary Table 10: significantly downregulated lncRNAs in dbR mice compared to the dbdb group. Supplementary Table 11: lncRNAs significantly upregulated by diabetic nephropathy yet reversed following rosiglitazone treatment. Supplementary Table 12: lncRNAs significantly downregulated by diabetic nephropathy yet reversed following rosiglitazone treatment. Supplementary Table 13: differentially expressed lncRNAs colocated with genes. Supplementary Table 14: differentially expressed lncRNAs coexpressed with genes. Supplementary Table 15: top 20 significantly enriched GO terms associated with differentially expressed mRNAs in the kidneys of dbdb mice compared to the controls. Supplementary Table 16: top 20 significantly enriched GO terms associated with differentially expressed mRNAs in the kidneys of dbR mice compared to the dbdb group. Supplementary Table 17: top 20 significantly enriched GO terms associated with differentially expressed lncRNAs coexpressed with genes in the kidneys of dbdb mice compared to the controls. Supplementa [file 1360843.f1.zip › 1360843.f1/Supplementary Table 19.xls]

## Sheet: Table S19 dbdb_vs_Control.Enric
Supplementary Table 19 Top 20 enriched KEGG pathways associated with differentially expressed mRNAs in dbdb mice compared to the controls
ID	Pathway term	Input number	Background number	rich factor	P-Value	qvalue
mmu01100	Metabolic pathways	222	1256	0.176752	0.000353607	0.0525986
mmu03320	PPAR signaling pathway	26	82	0.317073	0.00041634	0.0525986
mmu04976	Bile secretion	23	72	0.319444	0.000801318	0.0525986
mmu04610	Complement and coagulation cascades	24	77	0.311688	0.000830026	0.0525986
mmu02010	ABC transporters	17	46	0.369565	0.00103576	0.0525986
mmu05150	Staphylococcus aureus infection	18	51	0.352941	0.00114761	0.0525986
mmu00620	Pyruvate metabolism	15	39	0.384615	0.0014573	0.057251
mmu00980	Metabolism of xenobiotics by cytochrome P450	20	64	0.3125	0.00211232	0.0726111
mmu01040	Biosynthesis of unsaturated fatty acids	11	25	0.44	0.00268787	0.0810092
mmu00511	Other glycan degradation	9	18	0.5	0.00336033	0.0810092
mmu00600	Sphingolipid metabolism	16	48	0.333333	0.00336611	0.0810092
mmu00480	Glutathione metabolism	17	53	0.320755	0.00353495	0.0810092
mmu00330	Arginine and proline metabolism	18	59	0.305085	0.00423896	0.0896704
mmu00910	Nitrogen metabolism	8	17	0.470588	0.00739489	0.145257
mmu05020	Prion diseases	12	35	0.342857	0.00872545	0.148313
mmu04960	Aldosterone-regulated sodium reabsorption	13	40	0.325	0.00922577	0.148313
mmu04710	Circadian rhythm	11	31	0.354839	0.00968004	0.148313
mmu01212	Fatty acid metabolism	15	50	0.3	0.00970774	0.148313
mmu00982	Drug metabolism - cytochrome P450	18	66	0.272727	0.01085	0.15704
mmu04152	AMPK signaling pathway	29	129	0.224806	0.014455	0.184955
Input number: Number of corresponding genes associated with differential mRNAs enriched in the KEGG pathway
Background number: Number of genes in the pathway
Rich factor: Input number / Background number
Statistic method: hypergeometric test
FDR correction method: Benjamini and Hochberg
