# Supplementary material for: Altered Expression of Long Noncoding and Messenger RNAs in Diabetic Nephropathy following Treatment with Rosiglitazone
Source: Biomed Res Int. 2020 Jan 12;2020:1360843. doi: 10.1155/2020/1360843 (PMC6983290; doi:10.1155/2020/1360843)
Supplement: Supplementary Materials — Supplementary Table 1: significantly upregulated mRNAs in dbdb mice compared to the control group. Supplementary Table 2: significantly downregulated mRNAs in dbdb mice compared to the control group. Supplementary Table 3: significantly upregulated mRNAs in dbR mice compared to the dbdb group. Supplementary Table 4: significantly downregulated mRNAs in dbR mice compared to the dbdb group. Supplementary Table 5: mRNAs significantly upregulated by diabetic nephropathy yet reversed following rosiglitazone treatment. Supplementary Table 6: mRNAs significantly downregulated by diabetic nephropathy yet reversed following rosiglitazone treatment. Supplementary Table 7: significantly upregulated lncRNAs in dbdb mice compared to the control group. Supplementary Table 8: significantly downregulated lncRNAs in dbdb mice compared to the control group. Supplementary Table 9: significantly upregulated lncRNAs in dbR mice compared to the dbdb group. Supplementary Table 10: significantly downregulated lncRNAs in dbR mice compared to the dbdb group. Supplementary Table 11: lncRNAs significantly upregulated by diabetic nephropathy yet reversed following rosiglitazone treatment. Supplementary Table 12: lncRNAs significantly downregulated by diabetic nephropathy yet reversed following rosiglitazone treatment. Supplementary Table 13: differentially expressed lncRNAs colocated with genes. Supplementary Table 14: differentially expressed lncRNAs coexpressed with genes. Supplementary Table 15: top 20 significantly enriched GO terms associated with differentially expressed mRNAs in the kidneys of dbdb mice compared to the controls. Supplementary Table 16: top 20 significantly enriched GO terms associated with differentially expressed mRNAs in the kidneys of dbR mice compared to the dbdb group. Supplementary Table 17: top 20 significantly enriched GO terms associated with differentially expressed lncRNAs coexpressed with genes in the kidneys of dbdb mice compared to the controls. Supplementa [file 1360843.f1.zip › 1360843.f1/Supplementary Table 20.xls]

## Sheet: Table S20 dbR_vs_dbdb.Enriched_
Supplementary Table 20 Top 20 enriched KEGG pathways associated with differentially expressed mRNAs in dbR mice compared to dbdb mice
ID	Pathway term	Input number	Background number	rich factor	P-Value	qvalue
mmu03010	Ribosome	23	145	0.158621	1.89e-06	0.000422407
mmu05150	Staphylococcus aureus infection	11	51	0.215686	8.69e-05	0.00968974
mmu04512	ECM-receptor interaction	14	88	0.159091	0.000182811	0.013589
mmu04672	Intestinal immune network for IgA production	9	42	0.214286	0.000393559	0.0219409
mmu04612	Antigen processing and presentation	12	81	0.148148	0.000908204	0.0352982
mmu05323	Rheumatoid arthritis	12	82	0.146341	0.000999442	0.0352982
mmu04145	Phagosome	19	174	0.109195	0.00113252	0.0352982
mmu05145	Toxoplasmosis	14	113	0.123894	0.00169552	0.0352982
mmu05140	Leishmaniasis	10	65	0.153846	0.00184822	0.0352982
mmu04974	Protein digestion and absorption	12	89	0.134831	0.00187524	0.0352982
mmu05310	Asthma	6	24	0.25	0.00188342	0.0352982
mmu04610	Complement and coagulation cascades	11	77	0.142857	0.00189946	0.0352982
mmu05416	Viral myocarditis	11	78	0.141026	0.00208138	0.0357036
mmu04514	Cell adhesion molecules (CAMs)	17	160	0.10625	0.00261118	0.0415924
mmu05202	Transcriptional misregulation in cancer	18	178	0.101124	0.00323413	0.0480808
mmu00260	Glycine, serine and threonine metabolism	7	40	0.175	0.00467543	0.0651638
mmu05322	Systemic lupus erythematosus	15	145	0.103448	0.00565339	0.0731218
mmu05330	Allograft rejection	8	54	0.148148	0.00627901	0.0731218
mmu05204	Chemical carcinogenesis	11	92	0.119565	0.00646384	0.0731218
mmu04510	Focal adhesion	19	207	0.0917874	0.00658157	0.0731218
Input number: Number of corresponding genes associated with differential mRNAs enriched in the KEGG pathway
Background number: Number of genes in the pathway
Rich factor: Input number / Background number
Statistic method: hypergeometric test
FDR correction method: Benjamini and Hochberg
