# Supplementary material for: Altered Expression of Long Noncoding and Messenger RNAs in Diabetic Nephropathy following Treatment with Rosiglitazone
Source: Biomed Res Int. 2020 Jan 12;2020:1360843. doi: 10.1155/2020/1360843 (PMC6983290; doi:10.1155/2020/1360843)
Supplement: Supplementary Materials — Supplementary Table 1: significantly upregulated mRNAs in dbdb mice compared to the control group. Supplementary Table 2: significantly downregulated mRNAs in dbdb mice compared to the control group. Supplementary Table 3: significantly upregulated mRNAs in dbR mice compared to the dbdb group. Supplementary Table 4: significantly downregulated mRNAs in dbR mice compared to the dbdb group. Supplementary Table 5: mRNAs significantly upregulated by diabetic nephropathy yet reversed following rosiglitazone treatment. Supplementary Table 6: mRNAs significantly downregulated by diabetic nephropathy yet reversed following rosiglitazone treatment. Supplementary Table 7: significantly upregulated lncRNAs in dbdb mice compared to the control group. Supplementary Table 8: significantly downregulated lncRNAs in dbdb mice compared to the control group. Supplementary Table 9: significantly upregulated lncRNAs in dbR mice compared to the dbdb group. Supplementary Table 10: significantly downregulated lncRNAs in dbR mice compared to the dbdb group. Supplementary Table 11: lncRNAs significantly upregulated by diabetic nephropathy yet reversed following rosiglitazone treatment. Supplementary Table 12: lncRNAs significantly downregulated by diabetic nephropathy yet reversed following rosiglitazone treatment. Supplementary Table 13: differentially expressed lncRNAs colocated with genes. Supplementary Table 14: differentially expressed lncRNAs coexpressed with genes. Supplementary Table 15: top 20 significantly enriched GO terms associated with differentially expressed mRNAs in the kidneys of dbdb mice compared to the controls. Supplementary Table 16: top 20 significantly enriched GO terms associated with differentially expressed mRNAs in the kidneys of dbR mice compared to the dbdb group. Supplementary Table 17: top 20 significantly enriched GO terms associated with differentially expressed lncRNAs coexpressed with genes in the kidneys of dbdb mice compared to the controls. Supplementa [file 1360843.f1.zip › 1360843.f1/Supplementary Table 21.xls]

## Sheet: Table S21 dbdb_vs_Control.Enric
Supplementary Table 21 Top 20 enriched KEGG pathways associated with differentially expressed lncRNAs co-located with genes in dbdb mice compared to controls
ID	Pathway term	Input number	Background number	rich factor	P-Value	qvalue
mmu00980	Metabolism of xenobiotics by cytochrome P450	10	64	0.15625	4.11e-06	0.000530321
mmu00982	Drug metabolism - cytochrome P450	10	66	0.151515	5.25e-06	0.000530321
mmu05204	Chemical carcinogenesis	10	92	0.108696	7.12e-05	0.00479189
mmu00010	Glycolysis / Gluconeogenesis	8	65	0.123077	0.000172358	0.00870407
mmu01100	Metabolic pathways	48	1256	0.0382166	0.000221488	0.00894809
mmu00350	Tyrosine metabolism	5	39	0.128205	0.00246508	0.0688042
mmu00620	Pyruvate metabolism	5	39	0.128205	0.00246508	0.0688042
mmu00860	Porphyrin and chlorophyll metabolism	5	40	0.125	0.00272492	0.0688042
mmu00053	Ascorbate and aldarate metabolism	4	27	0.148148	0.00421259	0.0901015
mmu00830	Retinol metabolism	7	88	0.0795455	0.00446047	0.0901015
mmu00983	Drug metabolism - other enzymes	5	52	0.0961538	0.00756966	0.127753
mmu04971	Gastric acid secretion	6	74	0.0810811	0.0075893	0.127753
mmu00500	Starch and sucrose metabolism	5	54	0.0925926	0.00874078	0.135818
mmu00040	Pentose and glucuronate interconversions	4	36	0.111111	0.010514	0.151702
mmu00140	Steroid hormone biosynthesis	6	86	0.0697674	0.0145436	0.184388
mmu04975	Fat digestion and absorption	4	40	0.1	0.014605	0.184388
mmu04964	Proximal tubule bicarbonate reclamation	3	22	0.136364	0.0160429	0.190627
mmu00920	Sulfur metabolism	2	11	0.181818	0.030831	0.345993
mmu00480	Glutathione metabolism	4	53	0.0754717	0.0342319	0.362441
mmu04024	cAMP signaling pathway	9	198	0.0454545	0.0358853	0.362441
Input number: Number of corresponding genes associated with differential lncRNAs co-located mRNAs enriched in the KEGG pathway
Background number: Number of genes in the pathway
Rich factor: Input number / Background number
Statistic method: hypergeometric test
FDR correction method: Benjamini and Hochberg
