# Supplementary material for: Altered Expression of Long Noncoding and Messenger RNAs in Diabetic Nephropathy following Treatment with Rosiglitazone
Source: Biomed Res Int. 2020 Jan 12;2020:1360843. doi: 10.1155/2020/1360843 (PMC6983290; doi:10.1155/2020/1360843)
Supplement: Supplementary Materials — Supplementary Table 1: significantly upregulated mRNAs in dbdb mice compared to the control group. Supplementary Table 2: significantly downregulated mRNAs in dbdb mice compared to the control group. Supplementary Table 3: significantly upregulated mRNAs in dbR mice compared to the dbdb group. Supplementary Table 4: significantly downregulated mRNAs in dbR mice compared to the dbdb group. Supplementary Table 5: mRNAs significantly upregulated by diabetic nephropathy yet reversed following rosiglitazone treatment. Supplementary Table 6: mRNAs significantly downregulated by diabetic nephropathy yet reversed following rosiglitazone treatment. Supplementary Table 7: significantly upregulated lncRNAs in dbdb mice compared to the control group. Supplementary Table 8: significantly downregulated lncRNAs in dbdb mice compared to the control group. Supplementary Table 9: significantly upregulated lncRNAs in dbR mice compared to the dbdb group. Supplementary Table 10: significantly downregulated lncRNAs in dbR mice compared to the dbdb group. Supplementary Table 11: lncRNAs significantly upregulated by diabetic nephropathy yet reversed following rosiglitazone treatment. Supplementary Table 12: lncRNAs significantly downregulated by diabetic nephropathy yet reversed following rosiglitazone treatment. Supplementary Table 13: differentially expressed lncRNAs colocated with genes. Supplementary Table 14: differentially expressed lncRNAs coexpressed with genes. Supplementary Table 15: top 20 significantly enriched GO terms associated with differentially expressed mRNAs in the kidneys of dbdb mice compared to the controls. Supplementary Table 16: top 20 significantly enriched GO terms associated with differentially expressed mRNAs in the kidneys of dbR mice compared to the dbdb group. Supplementary Table 17: top 20 significantly enriched GO terms associated with differentially expressed lncRNAs coexpressed with genes in the kidneys of dbdb mice compared to the controls. Supplementa [file 1360843.f1.zip › 1360843.f1/Supplementary Table 22.xls]

## Sheet: Table S22 dbR_vs_dbdb.Enriched_
Supplementary Table 22 Top 20 enriched KEGG pathways associated with differentially expressed lncRNAs co-located with genes in dbR mice compared to dbdb mice
ID	Pathway term	Input number	Background number	rich factor	P-Value	qvalue
mmu00040	Pentose and glucuronate interconversions	5	36	0.138889	2.01e-06	0.000142541
mmu00053	Ascorbate and aldarate metabolism	4	27	0.148148	1.79e-05	0.000634013
mmu00980	Metabolism of xenobiotics by cytochrome P450	5	64	0.078125	2.69e-05	0.00063612
mmu00860	Porphyrin and chlorophyll metabolism	4	40	0.1	7.32e-05	0.00129971
mmu00140	Steroid hormone biosynthesis	5	86	0.0581395	0.000101756	0.00144493
mmu00983	Drug metabolism - other enzymes	4	52	0.0769231	0.000189024	0.00219743
mmu00500	Starch and sucrose metabolism	4	54	0.0740741	0.000216648	0.00219743
mmu00982	Drug metabolism - cytochrome P450	4	66	0.0606061	0.000446759	0.00396499
mmu00830	Retinol metabolism	4	88	0.0454545	0.00124961	0.009858
mmu05204	Chemical carcinogenesis	4	92	0.0434783	0.00146272	0.0103853
mmu04060	Cytokine-cytokine receptor interaction	6	264	0.0227273	0.00259174	0.0167285
mmu04062	Chemokine signaling pathway	4	196	0.0204082	0.0190709	0.112836
mmu04520	Adherens junction	2	74	0.027027	0.0570434	0.311545
mmu01230	Biosynthesis of amino acids	2	78	0.025641	0.0624354	0.316637
mmu04064	NF-kappa B signaling pathway	2	100	0.02	0.0948235	0.448831
mmu01100	Metabolic pathways	10	1256	0.00796178	0.109816	0.461168
mmu04964	Proximal tubule bicarbonate reclamation	1	22	0.0454545	0.110421	0.461168
mmu03040	Spliceosome	2	132	0.0151515	0.148182	0.584494
mmu04130	SNARE interactions in vesicular transport	1	33	0.030303	0.158866	0.593657
mmu04962	Vasopressin-regulated water reabsorption	1	44	0.0227273	0.204693	0.64795
Input number: Number of corresponding genes associated with differential lncRNAs co-located mRNAs enriched in the KEGG pathway
Background number: Number of genes in the pathway
Rich factor: Input number / Background number
Statistic method: hypergeometric test
FDR correction method: Benjamini and Hochberg
