# Supplementary material for: Altered Expression of Long Noncoding and Messenger RNAs in Diabetic Nephropathy following Treatment with Rosiglitazone
Source: Biomed Res Int. 2020 Jan 12;2020:1360843. doi: 10.1155/2020/1360843 (PMC6983290; doi:10.1155/2020/1360843)
Supplement: Supplementary Materials — Supplementary Table 1: significantly upregulated mRNAs in dbdb mice compared to the control group. Supplementary Table 2: significantly downregulated mRNAs in dbdb mice compared to the control group. Supplementary Table 3: significantly upregulated mRNAs in dbR mice compared to the dbdb group. Supplementary Table 4: significantly downregulated mRNAs in dbR mice compared to the dbdb group. Supplementary Table 5: mRNAs significantly upregulated by diabetic nephropathy yet reversed following rosiglitazone treatment. Supplementary Table 6: mRNAs significantly downregulated by diabetic nephropathy yet reversed following rosiglitazone treatment. Supplementary Table 7: significantly upregulated lncRNAs in dbdb mice compared to the control group. Supplementary Table 8: significantly downregulated lncRNAs in dbdb mice compared to the control group. Supplementary Table 9: significantly upregulated lncRNAs in dbR mice compared to the dbdb group. Supplementary Table 10: significantly downregulated lncRNAs in dbR mice compared to the dbdb group. Supplementary Table 11: lncRNAs significantly upregulated by diabetic nephropathy yet reversed following rosiglitazone treatment. Supplementary Table 12: lncRNAs significantly downregulated by diabetic nephropathy yet reversed following rosiglitazone treatment. Supplementary Table 13: differentially expressed lncRNAs colocated with genes. Supplementary Table 14: differentially expressed lncRNAs coexpressed with genes. Supplementary Table 15: top 20 significantly enriched GO terms associated with differentially expressed mRNAs in the kidneys of dbdb mice compared to the controls. Supplementary Table 16: top 20 significantly enriched GO terms associated with differentially expressed mRNAs in the kidneys of dbR mice compared to the dbdb group. Supplementary Table 17: top 20 significantly enriched GO terms associated with differentially expressed lncRNAs coexpressed with genes in the kidneys of dbdb mice compared to the controls. Supplementa [file 1360843.f1.zip › 1360843.f1/Supplementary Table 23.xls]

## Sheet: Table S23 dbdb_vs_Control.Enric
Supplementary Table 23 Top 20 enriched KEGG pathways associated with differentially expressed lncRNAs co-expressed with genes in dbdb mice compared to the controls
ID	Pathway term	Input number	Background number	rich factor	P-Value	qvalue
mmu00600	Sphingolipid metabolism	26	48	0.541667	2.34e-05	0.00642349
mmu01100	Metabolic pathways	294	1256	0.234076	5.93e-05	0.00815726
mmu00980	Metabolism of xenobiotics by cytochrome P450	24	64	0.375	0.00302525	0.235034
mmu04141	Protein processing in endoplasmic reticulum	48	169	0.284024	0.00546952	0.235034
mmu03050	Proteasome	18	45	0.4	0.00563111	0.235034
mmu04146	Peroxisome	27	81	0.333333	0.00638982	0.235034
mmu00620	Pyruvate metabolism	16	39	0.410256	0.00727636	0.235034
mmu00982	Drug metabolism - cytochrome P450	23	66	0.348485	0.00742588	0.235034
mmu00330	Arginine and proline metabolism	21	59	0.355932	0.00849374	0.235034
mmu05216	Thyroid cancer	13	29	0.448276	0.00854669	0.235034
mmu05215	Prostate cancer	28	89	0.314607	0.0103235	0.258089
mmu00010	Glycolysis / Gluconeogenesis	22	65	0.338462	0.0113097	0.259181
mmu00040	Pentose and glucuronate interconversions	14	36	0.388889	0.0164032	0.346992
mmu00480	Glutathione metabolism	18	53	0.339623	0.0200974	0.350101
mmu00071	Fatty acid degradation	17	49	0.346939	0.0201702	0.350101
mmu00650	Butanoate metabolism	11	26	0.423077	0.0203695	0.350101
mmu04142	Lysosome	34	123	0.276423	0.0231235	0.358699
mmu04966	Collecting duct acid secretion	11	27	0.407407	0.0247828	0.358699
mmu00640	Propanoate metabolism	11	27	0.407407	0.0247828	0.358699
mmu05223	Non-small cell lung cancer	18	56	0.321429	0.0299121	0.409832
Input number: Number of corresponding genes associated with differential lncRNAs co-expressed mRNAs enriched in the KEGG pathway
Background number: Number of genes in the pathway
Rich factor: Input number / Background number
Statistic method: hypergeometric test
FDR correction method: Benjamini and Hochberg
