# Supplementary material for: Altered Expression of Long Noncoding and Messenger RNAs in Diabetic Nephropathy following Treatment with Rosiglitazone
Source: Biomed Res Int. 2020 Jan 12;2020:1360843. doi: 10.1155/2020/1360843 (PMC6983290; doi:10.1155/2020/1360843)
Supplement: Supplementary Materials — Supplementary Table 1: significantly upregulated mRNAs in dbdb mice compared to the control group. Supplementary Table 2: significantly downregulated mRNAs in dbdb mice compared to the control group. Supplementary Table 3: significantly upregulated mRNAs in dbR mice compared to the dbdb group. Supplementary Table 4: significantly downregulated mRNAs in dbR mice compared to the dbdb group. Supplementary Table 5: mRNAs significantly upregulated by diabetic nephropathy yet reversed following rosiglitazone treatment. Supplementary Table 6: mRNAs significantly downregulated by diabetic nephropathy yet reversed following rosiglitazone treatment. Supplementary Table 7: significantly upregulated lncRNAs in dbdb mice compared to the control group. Supplementary Table 8: significantly downregulated lncRNAs in dbdb mice compared to the control group. Supplementary Table 9: significantly upregulated lncRNAs in dbR mice compared to the dbdb group. Supplementary Table 10: significantly downregulated lncRNAs in dbR mice compared to the dbdb group. Supplementary Table 11: lncRNAs significantly upregulated by diabetic nephropathy yet reversed following rosiglitazone treatment. Supplementary Table 12: lncRNAs significantly downregulated by diabetic nephropathy yet reversed following rosiglitazone treatment. Supplementary Table 13: differentially expressed lncRNAs colocated with genes. Supplementary Table 14: differentially expressed lncRNAs coexpressed with genes. Supplementary Table 15: top 20 significantly enriched GO terms associated with differentially expressed mRNAs in the kidneys of dbdb mice compared to the controls. Supplementary Table 16: top 20 significantly enriched GO terms associated with differentially expressed mRNAs in the kidneys of dbR mice compared to the dbdb group. Supplementary Table 17: top 20 significantly enriched GO terms associated with differentially expressed lncRNAs coexpressed with genes in the kidneys of dbdb mice compared to the controls. Supplementa [file 1360843.f1.zip › 1360843.f1/Supplementary Table 24.xls]

## Sheet: Table S24 dbR_vs_dbdb.Enriched_
Supplementary Table 24 Top 20 enriched KEGG pathways associated with differentially expressed lncRNAs co-expressed with genes in dbR mice compared to dbdb mice
ID	Pathway term	Input number	Background number	rich factor	P-Value	qvalue
mmu03010	Ribosome	20	145	0.137931	8.74e-08	1.85e-05
mmu05214	Glioma	6	65	0.0923077	0.0177571	0.793377
mmu05152	Tuberculosis	11	176	0.0625	0.022375	0.793377
mmu05215	Prostate cancer	7	89	0.0786517	0.0227769	0.793377
mmu04921	Oxytocin signaling pathway	10	158	0.0632911	0.0266382	0.793377
mmu04662	B cell receptor signaling pathway	6	73	0.0821918	0.0283986	0.793377
mmu05223	Non-small cell lung cancer	5	56	0.0892857	0.0329917	0.793377
mmu04380	Osteoclast differentiation	8	126	0.0634921	0.0438755	0.793377
mmu00563	Glycosylphosphatidylinositol(GPI)-anchor biosynthesis	3	25	0.12	0.0476923	0.793377
mmu05140	Leishmaniasis	5	65	0.0769231	0.0543838	0.793377
mmu04068	FoxO signaling pathway	8	135	0.0592593	0.0599015	0.793377
mmu00590	Arachidonic acid metabolism	6	90	0.0666667	0.0630227	0.793377
mmu05216	Thyroid cancer	3	29	0.103448	0.0663344	0.793377
mmu05204	Chemical carcinogenesis	6	92	0.0652174	0.0682357	0.793377
mmu05218	Melanoma	5	71	0.0704225	0.072226	0.793377
mmu00591	Linoleic acid metabolism	4	50	0.08	0.0733094	0.793377
mmu05150	Staphylococcus aureus infection	4	51	0.0784314	0.0773165	0.793377
mmu05220	Chronic myeloid leukemia	5	73	0.0684932	0.0788047	0.793377
mmu00480	Glutathione metabolism	4	53	0.0754717	0.0856513	0.793377
mmu05416	Viral myocarditis	5	78	0.0641026	0.0965961	0.793377
Input number: Number of corresponding genes associated with differential lncRNAs co-expressed mRNAs enriched in the KEGG pathway
Background number: Number of genes in the pathway
Rich factor: Input number / Background number
Statistic method: hypergeometric test
FDR correction method: Benjamini and Hochberg
