# Supplementary material for: Altered Expression of Long Noncoding and Messenger RNAs in Diabetic Nephropathy following Treatment with Rosiglitazone
Source: Biomed Res Int. 2020 Jan 12;2020:1360843. doi: 10.1155/2020/1360843 (PMC6983290; doi:10.1155/2020/1360843)
Supplement: Supplementary Materials — Supplementary Table 1: significantly upregulated mRNAs in dbdb mice compared to the control group. Supplementary Table 2: significantly downregulated mRNAs in dbdb mice compared to the control group. Supplementary Table 3: significantly upregulated mRNAs in dbR mice compared to the dbdb group. Supplementary Table 4: significantly downregulated mRNAs in dbR mice compared to the dbdb group. Supplementary Table 5: mRNAs significantly upregulated by diabetic nephropathy yet reversed following rosiglitazone treatment. Supplementary Table 6: mRNAs significantly downregulated by diabetic nephropathy yet reversed following rosiglitazone treatment. Supplementary Table 7: significantly upregulated lncRNAs in dbdb mice compared to the control group. Supplementary Table 8: significantly downregulated lncRNAs in dbdb mice compared to the control group. Supplementary Table 9: significantly upregulated lncRNAs in dbR mice compared to the dbdb group. Supplementary Table 10: significantly downregulated lncRNAs in dbR mice compared to the dbdb group. Supplementary Table 11: lncRNAs significantly upregulated by diabetic nephropathy yet reversed following rosiglitazone treatment. Supplementary Table 12: lncRNAs significantly downregulated by diabetic nephropathy yet reversed following rosiglitazone treatment. Supplementary Table 13: differentially expressed lncRNAs colocated with genes. Supplementary Table 14: differentially expressed lncRNAs coexpressed with genes. Supplementary Table 15: top 20 significantly enriched GO terms associated with differentially expressed mRNAs in the kidneys of dbdb mice compared to the controls. Supplementary Table 16: top 20 significantly enriched GO terms associated with differentially expressed mRNAs in the kidneys of dbR mice compared to the dbdb group. Supplementary Table 17: top 20 significantly enriched GO terms associated with differentially expressed lncRNAs coexpressed with genes in the kidneys of dbdb mice compared to the controls. Supplementa [file 1360843.f1.zip › 1360843.f1/Supplementary Table 25.xls]

## Sheet: gsea_report_for_dbdb_1496588860
Supplementary Table 25 Gene sets significantly upregulated in dbdb mice compared to controls as determined by GSEA
NAME	SIZE	Enrichment Score (ES)	Normalized Enrichment Score (NES)	Nominal p-value	FDR q-val	FWER p-val	RANK AT MAX	LEADING EDGE
HALLMARK_ALLOGRAFT_REJECTION	143	0.488818	2.09761	0	0	0	1791	tags=41%, list=17%, signal=48%
HALLMARK_MYC_TARGETS_V1	175	0.385316	1.68889	0	0.0328651	0.036	3149	tags=43%, list=29%, signal=60%
HALLMARK_INFLAMMATORY_RESPONSE	150	0.360922	1.54059	0	0.0690703	0.116	1050	tags=23%, list=10%, signal=25%
HALLMARK_CHOLESTEROL_HOMEOSTASIS	66	0.391974	1.47609	0.0187668	0.0961238	0.203	1118	tags=29%, list=10%, signal=32%
HALLMARK_IL6_JAK_STAT3_SIGNALING	72	0.374001	1.45399	0.0381232	0.0932416	0.241	1042	tags=26%, list=10%, signal=29%
HALLMARK_COMPLEMENT	157	0.32831	1.43832	0.00348432	0.088915	0.268	1173	tags=23%, list=11%, signal=25%
HALLMARK_SPERMATOGENESIS	74	0.353402	1.37112	0.0310559	0.13053	0.423	1986	tags=34%, list=18%, signal=41%
HALLMARK_HEDGEHOG_SIGNALING	32	0.402832	1.33793	0.0958549	0.140334	0.487	1286	tags=38%, list=12%, signal=42%
HALLMARK_ANGIOGENESIS	29	0.416346	1.33173	0.100239	0.133072	0.51	709	tags=24%, list=7%, signal=26%
HALLMARK_MTORC1_SIGNALING	180	0.295898	1.31895	0.0171233	0.131574	0.548	2389	tags=38%, list=22%, signal=48%
HALLMARK_PROTEIN_SECRETION	89	0.319957	1.29641	0.0509915	0.144897	0.618	3734	tags=54%, list=35%, signal=82%
HALLMARK_G2M_CHECKPOINT	178	0.290474	1.28403	0.037931	0.146172	0.647	1354	tags=21%, list=13%, signal=23%
