# Supplementary material for: Altered Expression of Long Noncoding and Messenger RNAs in Diabetic Nephropathy following Treatment with Rosiglitazone
Source: Biomed Res Int. 2020 Jan 12;2020:1360843. doi: 10.1155/2020/1360843 (PMC6983290; doi:10.1155/2020/1360843)
Supplement: Supplementary Materials — Supplementary Table 1: significantly upregulated mRNAs in dbdb mice compared to the control group. Supplementary Table 2: significantly downregulated mRNAs in dbdb mice compared to the control group. Supplementary Table 3: significantly upregulated mRNAs in dbR mice compared to the dbdb group. Supplementary Table 4: significantly downregulated mRNAs in dbR mice compared to the dbdb group. Supplementary Table 5: mRNAs significantly upregulated by diabetic nephropathy yet reversed following rosiglitazone treatment. Supplementary Table 6: mRNAs significantly downregulated by diabetic nephropathy yet reversed following rosiglitazone treatment. Supplementary Table 7: significantly upregulated lncRNAs in dbdb mice compared to the control group. Supplementary Table 8: significantly downregulated lncRNAs in dbdb mice compared to the control group. Supplementary Table 9: significantly upregulated lncRNAs in dbR mice compared to the dbdb group. Supplementary Table 10: significantly downregulated lncRNAs in dbR mice compared to the dbdb group. Supplementary Table 11: lncRNAs significantly upregulated by diabetic nephropathy yet reversed following rosiglitazone treatment. Supplementary Table 12: lncRNAs significantly downregulated by diabetic nephropathy yet reversed following rosiglitazone treatment. Supplementary Table 13: differentially expressed lncRNAs colocated with genes. Supplementary Table 14: differentially expressed lncRNAs coexpressed with genes. Supplementary Table 15: top 20 significantly enriched GO terms associated with differentially expressed mRNAs in the kidneys of dbdb mice compared to the controls. Supplementary Table 16: top 20 significantly enriched GO terms associated with differentially expressed mRNAs in the kidneys of dbR mice compared to the dbdb group. Supplementary Table 17: top 20 significantly enriched GO terms associated with differentially expressed lncRNAs coexpressed with genes in the kidneys of dbdb mice compared to the controls. Supplementa [file 1360843.f1.zip › 1360843.f1/Supplementary Table 26.xls]

## Sheet: Table S26
Supplementary Table 26 Gene sets significantly upregulated in controls compared to dbdb mice as determined by GSEA
NAME	SIZE	Enrichment Score (ES)	Normalized Enrichment Score (NES)	Nominal p-value	FDR q-val	FWER p-val	RANK AT MAX	LEADING EDGE
HALLMARK_KRAS_SIGNALING_DN	110	-0.521426	-2.00872	0	0.00071875	0.001	1508	tags=37%, list=14%, signal=43%
HALLMARK_ESTROGEN_RESPONSE_EARLY	163	-0.431995	-1.74687	0	0.00755274	0.022	2238	tags=40%, list=21%, signal=50%
HALLMARK_P53_PATHWAY	172	-0.413529	-1.6441	0	0.0188109	0.081	2079	tags=31%, list=19%, signal=38%
HALLMARK_HYPOXIA	167	-0.402977	-1.62356	0	0.0179884	0.102	1772	tags=29%, list=16%, signal=34%
HALLMARK_UV_RESPONSE_UP	130	-0.407863	-1.59034	0	0.0189547	0.131	3304	tags=45%, list=31%, signal=64%
HALLMARK_TNFA_SIGNALING_VIA_NFKB	164	-0.37433	-1.50969	0.00136426	0.0347703	0.273	2084	tags=36%, list=19%, signal=44%
HALLMARK_ESTROGEN_RESPONSE_LATE	162	-0.371365	-1.47807	0.0069735	0.0417474	0.365	2031	tags=36%, list=19%, signal=43%
HALLMARK_MYOGENESIS	158	-0.351656	-1.40888	0.013624	0.0740819	0.607	1452	tags=27%, list=13%, signal=30%
HALLMARK_APOPTOSIS	144	-0.35645	-1.39947	0.0126761	0.0717802	0.636	1737	tags=25%, list=16%, signal=29%
HALLMARK_APICAL_SURFACE	40	-0.415188	-1.32767	0.0900164	0.11961	0.842	2396	tags=48%, list=22%, signal=61%
