# Supplementary material for: Altered Expression of Long Noncoding and Messenger RNAs in Diabetic Nephropathy following Treatment with Rosiglitazone
Source: Biomed Res Int. 2020 Jan 12;2020:1360843. doi: 10.1155/2020/1360843 (PMC6983290; doi:10.1155/2020/1360843)
Supplement: Supplementary Materials — Supplementary Table 1: significantly upregulated mRNAs in dbdb mice compared to the control group. Supplementary Table 2: significantly downregulated mRNAs in dbdb mice compared to the control group. Supplementary Table 3: significantly upregulated mRNAs in dbR mice compared to the dbdb group. Supplementary Table 4: significantly downregulated mRNAs in dbR mice compared to the dbdb group. Supplementary Table 5: mRNAs significantly upregulated by diabetic nephropathy yet reversed following rosiglitazone treatment. Supplementary Table 6: mRNAs significantly downregulated by diabetic nephropathy yet reversed following rosiglitazone treatment. Supplementary Table 7: significantly upregulated lncRNAs in dbdb mice compared to the control group. Supplementary Table 8: significantly downregulated lncRNAs in dbdb mice compared to the control group. Supplementary Table 9: significantly upregulated lncRNAs in dbR mice compared to the dbdb group. Supplementary Table 10: significantly downregulated lncRNAs in dbR mice compared to the dbdb group. Supplementary Table 11: lncRNAs significantly upregulated by diabetic nephropathy yet reversed following rosiglitazone treatment. Supplementary Table 12: lncRNAs significantly downregulated by diabetic nephropathy yet reversed following rosiglitazone treatment. Supplementary Table 13: differentially expressed lncRNAs colocated with genes. Supplementary Table 14: differentially expressed lncRNAs coexpressed with genes. Supplementary Table 15: top 20 significantly enriched GO terms associated with differentially expressed mRNAs in the kidneys of dbdb mice compared to the controls. Supplementary Table 16: top 20 significantly enriched GO terms associated with differentially expressed mRNAs in the kidneys of dbR mice compared to the dbdb group. Supplementary Table 17: top 20 significantly enriched GO terms associated with differentially expressed lncRNAs coexpressed with genes in the kidneys of dbdb mice compared to the controls. Supplementa [file 1360843.f1.zip › 1360843.f1/Supplementary Table 27.xls]

## Sheet: gsea_report_for_dbR_14966539332
Supplementary Table 27 Gene sets significantly upregulated in dbR mice compared to dbR mice as determined by GSEA
NAME	SIZE	Enrichment Score (ES)	Normalized Enrichment Score (NES)	Nominal p-value	FDR q-val	FWER p-val	RANK AT MAX	LEADING EDGE
HALLMARK_TNFA_SIGNALING_VIA_NFKB	164	0.370497	1.73337	0	0.0178182	0.012	1366	tags=32%, list=13%, signal=36%
HALLMARK_P53_PATHWAY	172	0.344172	1.60775	0	0.0322404	0.042	1265	tags=24%, list=12%, signal=27%
HALLMARK_KRAS_SIGNALING_DN	105	0.338671	1.48542	0.00947867	0.0591093	0.112	1461	tags=30%, list=14%, signal=34%
HALLMARK_ESTROGEN_RESPONSE_EARLY	163	0.296635	1.38434	0.00704225	0.0961675	0.231	1477	tags=28%, list=14%, signal=31%
HALLMARK_HYPOXIA	166	0.268801	1.25984	0.0347826	0.204526	0.512	2121	tags=30%, list=20%, signal=36%
