# Supplementary material for: Altered Expression of Long Noncoding and Messenger RNAs in Diabetic Nephropathy following Treatment with Rosiglitazone
Source: Biomed Res Int. 2020 Jan 12;2020:1360843. doi: 10.1155/2020/1360843 (PMC6983290; doi:10.1155/2020/1360843)
Supplement: Supplementary Materials — Supplementary Table 1: significantly upregulated mRNAs in dbdb mice compared to the control group. Supplementary Table 2: significantly downregulated mRNAs in dbdb mice compared to the control group. Supplementary Table 3: significantly upregulated mRNAs in dbR mice compared to the dbdb group. Supplementary Table 4: significantly downregulated mRNAs in dbR mice compared to the dbdb group. Supplementary Table 5: mRNAs significantly upregulated by diabetic nephropathy yet reversed following rosiglitazone treatment. Supplementary Table 6: mRNAs significantly downregulated by diabetic nephropathy yet reversed following rosiglitazone treatment. Supplementary Table 7: significantly upregulated lncRNAs in dbdb mice compared to the control group. Supplementary Table 8: significantly downregulated lncRNAs in dbdb mice compared to the control group. Supplementary Table 9: significantly upregulated lncRNAs in dbR mice compared to the dbdb group. Supplementary Table 10: significantly downregulated lncRNAs in dbR mice compared to the dbdb group. Supplementary Table 11: lncRNAs significantly upregulated by diabetic nephropathy yet reversed following rosiglitazone treatment. Supplementary Table 12: lncRNAs significantly downregulated by diabetic nephropathy yet reversed following rosiglitazone treatment. Supplementary Table 13: differentially expressed lncRNAs colocated with genes. Supplementary Table 14: differentially expressed lncRNAs coexpressed with genes. Supplementary Table 15: top 20 significantly enriched GO terms associated with differentially expressed mRNAs in the kidneys of dbdb mice compared to the controls. Supplementary Table 16: top 20 significantly enriched GO terms associated with differentially expressed mRNAs in the kidneys of dbR mice compared to the dbdb group. Supplementary Table 17: top 20 significantly enriched GO terms associated with differentially expressed lncRNAs coexpressed with genes in the kidneys of dbdb mice compared to the controls. Supplementa [file 1360843.f1.zip › 1360843.f1/Supplementary Table 28.xls]

## Sheet: gsea_report_for_dbdb_1496653933
Supplementary Table 28 Gene sets significantly upregulated in dbdb mice as compared to dbR mice as determined by GSEA
NAME	SIZE	Enrichment Score (ES)	Normalized Enrichment Score (NES)	Nominal p-value	FDR q-val	FWER p-val	RANK AT MAX	LEADING EDGE
HALLMARK_EPITHELIAL_MESENCHYMAL_TRANSITION	172	-0.486926	-1.87531	0	0.00448231	0.005	1748	tags=38%, list=16%, signal=45%
HALLMARK_G2M_CHECKPOINT	178	-0.453554	-1.73847	0	0.016254	0.036	1452	tags=25%, list=13%, signal=28%
HALLMARK_UV_RESPONSE_DN	130	-0.447576	-1.67154	0	0.0218568	0.07	1402	tags=27%, list=13%, signal=31%
HALLMARK_KRAS_SIGNALING_UP	161	-0.434773	-1.66211	0	0.0185702	0.08	1936	tags=37%, list=18%, signal=45%
HALLMARK_ALLOGRAFT_REJECTION	139	-0.436704	-1.61348	0	0.0248312	0.132	1839	tags=31%, list=17%, signal=37%
HALLMARK_IL2_STAT5_SIGNALING	163	-0.424949	-1.61294	0	0.0206927	0.132	1587	tags=29%, list=15%, signal=33%
HALLMARK_HEDGEHOG_SIGNALING	32	-0.539227	-1.58725	0.0130814	0.0238918	0.169	903	tags=22%, list=8%, signal=24%
HALLMARK_MITOTIC_SPINDLE	181	-0.405032	-1.57305	0.00113636	0.0233765	0.188	1373	tags=18%, list=13%, signal=20%
HALLMARK_APICAL_JUNCTION	169	-0.406995	-1.55308	0	0.0249758	0.224	1242	tags=22%, list=12%, signal=24%
HALLMARK_COAGULATION	105	-0.422184	-1.54046	0.00746269	0.0252761	0.252	2511	tags=37%, list=23%, signal=48%
HALLMARK_INFLAMMATORY_RESPONSE	149	-0.384579	-1.46681	0.00955794	0.0502138	0.466	1762	tags=30%, list=16%, signal=36%
HALLMARK_E2F_TARGETS	171	-0.377575	-1.44331	0.00684931	0.0574675	0.552	3079	tags=36%, list=29%, signal=49%
HALLMARK_REACTIVE_OXIGEN_SPECIES_PATHWAY	41	-0.468734	-1.44211	0.0439716	0.0535914	0.555	2571	tags=34%, list=24%, signal=45%
HALLMARK_COMPLEMENT	157	-0.357846	-1.34966	0.0426759	0.123035	0.869	2002	tags=25%, list=19%, signal=31%
HALLMARK_MYOGENESIS	161	-0.347826	-1.33043	0.0393519	0.137871	0.917	1818	tags=25%, list=17%, signal=30%
