# Supplementary material for: Altered Expression of Long Noncoding and Messenger RNAs in Diabetic Nephropathy following Treatment with Rosiglitazone
Source: Biomed Res Int. 2020 Jan 12;2020:1360843. doi: 10.1155/2020/1360843 (PMC6983290; doi:10.1155/2020/1360843)
Supplement: Supplementary Materials — Supplementary Table 1: significantly upregulated mRNAs in dbdb mice compared to the control group. Supplementary Table 2: significantly downregulated mRNAs in dbdb mice compared to the control group. Supplementary Table 3: significantly upregulated mRNAs in dbR mice compared to the dbdb group. Supplementary Table 4: significantly downregulated mRNAs in dbR mice compared to the dbdb group. Supplementary Table 5: mRNAs significantly upregulated by diabetic nephropathy yet reversed following rosiglitazone treatment. Supplementary Table 6: mRNAs significantly downregulated by diabetic nephropathy yet reversed following rosiglitazone treatment. Supplementary Table 7: significantly upregulated lncRNAs in dbdb mice compared to the control group. Supplementary Table 8: significantly downregulated lncRNAs in dbdb mice compared to the control group. Supplementary Table 9: significantly upregulated lncRNAs in dbR mice compared to the dbdb group. Supplementary Table 10: significantly downregulated lncRNAs in dbR mice compared to the dbdb group. Supplementary Table 11: lncRNAs significantly upregulated by diabetic nephropathy yet reversed following rosiglitazone treatment. Supplementary Table 12: lncRNAs significantly downregulated by diabetic nephropathy yet reversed following rosiglitazone treatment. Supplementary Table 13: differentially expressed lncRNAs colocated with genes. Supplementary Table 14: differentially expressed lncRNAs coexpressed with genes. Supplementary Table 15: top 20 significantly enriched GO terms associated with differentially expressed mRNAs in the kidneys of dbdb mice compared to the controls. Supplementary Table 16: top 20 significantly enriched GO terms associated with differentially expressed mRNAs in the kidneys of dbR mice compared to the dbdb group. Supplementary Table 17: top 20 significantly enriched GO terms associated with differentially expressed lncRNAs coexpressed with genes in the kidneys of dbdb mice compared to the controls. Supplementa [file 1360843.f1.zip › 1360843.f1/Supplementary Table 30.xls]

## Sheet: Sheet1
Supplementary Table 30 Locations and Sequences of differentially expressed novel lncRNAs identified via RNA-seq
Novel_lncRNA_ID	Novel_lncRNA_Gene_ID	Gene_Type	gene_location	Strand	Exon_number	Length	ORF	Sequence
LNC_000001	XLOC_000118	lincRNA	JH584304.1:38103-41528	-	2	2011	160	AGAAACTTGAATTATAAGGAGTGGGGGTGGGGTGAGAGTTACAGATGGCCCTAGAGGGACAGAGAGGCCGCAGGCTGCACACAGGAGTGGGAATGAAATAGTATATCAAGGAGGAGAGAAGGTTAGATGTGAAGCATGGTGGGAAGAAGGCTCAGAACACGACAAACACGCTCCTATGTGGGCCTCTGGTGAGGGTCTATTACCTGCATGGGCAGACAGAGCATGCTGAGGTGAGCATGAAGATGCATAGCTTGCCATGGGGAAGCCAGAATCAAACACTTAAGCAGTAGGAGGCACTGAGGCCATTCTCTGCACATCTTAGGCAGGACTGCCCCACCCACCCACACCTGATTCTGGAAGGTCTTTCCTCGACCTGAGAGATCCAAAGGACTCAAGACT…
LNC_000002	XLOC_000331	lincRNA	chr1:36016774-36021734	+	3	706	115	CATCAAAGACAGACAGGCAGTCTGGCAGGGACTCTGAGGAGAATCAGGGTCCCTGTAGCAGAAGAGATCTCTGCTCACACAGTTAAGGAAGAGGTTCACACCAGGAGCTGCCAGGCTCTGGGCTTCCAGGAACTAACCACTTTCTGGAGTTCCACGTGTGGCTGGTTTCTCCGAGCCTTGGACCTATTTCGTGGACCCTGATTTTGGAGAGAGAACCGCACCAAAGAACTTCTGGTATTCTGGCTGCTTTTTGGCACTTCCGCTGTGACCTGTGACGATTGGGCAGAGTCTCTGGTTTTCTGCTGGATGTAGTAGCTGCTACTGATTCGTGTTTGGTGTTTGCTTTTGGACTGGACAGCTGATATCCTGACAATGAAGATTGTAATCGCCCCAAAGAAC…
LNC_000012	XLOC_002590	lincRNA	chr1:127698740-127719450	-	2	19267	158	GGAGGGGCATAGTGTCCACACTTCAGTCTTCATTTTTCTTGAGTTTCATGTGTTTAGGAAATTGTATCTTATATCGTGGGTATCCTAGGTTTTGGGCTAGTATCCACTTATCAGTGAGTACATATTGTGTGAGTTCCTTTGTGATTGCTAAATCTATCTTTAACTTCACTGCCCTGTTACCTTCTGTGAGGCCCATTGGTCTTTGATGCCCAAAATACTGGGCAGCCCTTCCTGGGGCTGCTTTCTTTCCTCCTACATTTCAGATTATCTTCCCTCTGCAGCTCTAAATCTCTTCAATTTCCCACTGTATCATGGTGATTTTTCATCTCCTCCCTCTCTGGCTCCCTTGTCCTAGCCCAAACAATCTAAGGGTCCCACCCCATCTCCCTTTGCTCAGCC…
LNC_000018	XLOC_003185	lincRNA	chr1:186024058-186047801	-	2	21613	200	AATCAGAGAACATAGCCATGACACAAACCTTTAAAACTGATGGTTTTTGAATTTGCAATTGGTTTGGCTGCTGTAAGTGATATTGTAGCTATTACTGAATTTAAAAATATAAGTGATTACATAATTCAAAAAGTCAAAAGGTAGAGCAATACTTTAACCACATGATAGCGAGAAGGCAAAAAGGAAAGACTTGGAGAATACTTCAAGGAAATGTAGCATGAGAATATTTTCTGAATAAATCACAGGACTGGAGAGCCAGTTTCGAGCACATATGGCTCTTGTGGAGGACCCTGGGTCAGTGCCCAGCACAGGCATTGATGACTATTGAGACCCTGTAACTCCAGCTCCATGGGATACAATGCCCTCTTCTGGCCTCACTGGGTACCTACACTGCAGGTG…
LNC_000023	XLOC_003691	lincRNA	chr10:70340303-70347510	+	2	6558	121	TGACACATCTACTCCAACAAGGCCACACCTACTCCAACAAGGTCACACCTCCTAATAGTGCCTCTCCCTGGGCCAAGCATCAAGGTCACACCTCCTAATTGTGCCTCTCCCTGGGCCAAGCATATACAAACCATCACAGACAGTATACAGTCAGGACACTAGTCATCTTCCTTATGGATTGGTCTGATGTTCAACACAATAATCTAACTAATGCAGAAAATAGAGCATTGGCAAACCTCACAGCTTCACTCTTGTTTGCATTTGTGTTTGAGAGATTGCCGCCTAAGCAATAACATATAACATGTTGTGTTTCACTGTTTAATGTTAAGGCTCACACCAGAACAAGTCAAAAGCTAATAATCTTCTTGTCTATTACCCAGGGGGTCTTCAAGCTGGACA…
LNC_000032	XLOC_004175	lincRNA	chr10:122626865-122631130	+	2	2560	123	CTCTCTTACCTCTTATCCCTCACTCTCACCTTCTCTCTCCCTGCTCTTTGTCTTCTCTTCTCCTCTCTCCTCTCTCTTACTCTCTTTCTCTCTAGCCTTTCCTCTTCCTCTCCGTCTCCCTCTCTGTCTCCTCCCCCCCCTCCCTCCCTTCTCTCTTTCTCCCTGCCTTTCTATAATAAAGCTCTAAAACCATAGAATGTCTCTGCTCATCAAGGCCCACTGCACTTGGAGGATGGGACAGGCTTTCTCCTAATGAGTTATTTCTAATCTCCTGTTAGAAGGCCTTCCTGTGCTCCAGTCAAGATCTGCTACACTCACTCTCGCAGGTATTGGGAACCTCTTCCCTCATCCCTCTCTCCTATAACCCTGGTAGCTTTAGCAAAGTAGCTCCAGGAATCC…
LNC_000034	XLOC_004326	lincRNA	chr10:9976626-10151476	-	3	1465	94	CCGTGACAAGGTGAAGCTAGCAGATCATGAAACCACTGATTGCAGAGACAGAAAGAAAATAGCATCTGAAAATAAAATCTCTAGCTGCTGCTTCCTGTTATTTAGTTAAAAAAATTATGAAAGAAGTGGGAAAATGCTTTGGCTTCACAGAAACCCATTAAGAGACATTGAAAAGACACGGTCCAGGGAGCAGAAAAGGGAGGAGGCCGATGAATCAGAAATGAGGACATCATTCACCATCGATCAAGATATAGAACTCTCATCTCTTTCTCCAGCACCATGCCCAAAAAGGAAATAAGTATGGAAATGAAATCATGACTAAGATTTGATTAATCTCTCAATTAGTACAAGGTAATAGTAAGATGTGGCACATCCACAAGGAACAAACTTTTTAAAAGG…
LNC_000038	XLOC_004689	antisense_lncRNA	chr10:77001735-77030295	-	3	5752	161	CACACAGTGGAAATCTAAGCGTATACTAGACTAGGGGAAGACATCCCTCTCAGACAGGACCATGGCCTTCCCTCAACAAGATGTGCTGGCGAGTTTTATGTCAGCTTGACACATGCTAGAGCAACCGGGGAAAAGGGAGCCTCAGTTGAGAAAATGCCTCCATAACATCCAGCTGTAGGGCAGTCTCTTAATTAGTGATTGATGGGAGAGGGCACAGCCCAGTGTGGGTGGTGCCATCCCTGGGCTGAGGATCCTGGGTTCTATAAGGAAGCAAGCTGAGCAAGCCACAAGGAGCAAACCGGTAAGCGAGGCTGATTCATGGCGTCTGCATCAGCTCCTGCCTCCAGGTTCCTGCTCTGTTTAGGTTCCTGTCCTGGCTTCCTTTGGTGATGAACAGGG…
LNC_000039	XLOC_004689	antisense_lncRNA	chr10:77001735-77030295	-	2	8036	161	GTCCTCTAGCTCCGCACCTCCTACCAGCAAGATAGACTGGCATGTCTGCTATGCAGAGGAGTTTGAAGAATAAGATGGGCACTTGTCACCATCCTAGTCTCGGGCTGGCAGGGCTCATGAGGGAAAGCAGCCCAGCTGCCATTTCATCCCACTGTCAAGGCTCACTTGAGAACACTTGAGCTGCCACAGTCAGATCCAGGAAGAGAAAGAACAGCACGGGACTTCCCTGCCATGCTCATTCCAGCCAGGGAGCCCAGCAACTGTGTTCATTGCTAATGGTCCCAAAGTCCATATTGTTCCGGATCAAGGACCTGACTGAGGTAGCCTGCTTAGCCTTTGCCCAGCTCCAGAAAAGCCAGGCCTCACATCGCCTCACCATAAAGGGCCAGGTCAGAATCT…
LNC_000048	XLOC_005060	lincRNA	chr10:126550736-126605104	-	2	819	87	TGTTGCTTTGCTAAGACATCACATCCAAAAGCGACTCACAGAGAGAAGAGTTTATTGTTGGCTATGGTTCCAGAAGGATATGGGCATCATGGCAGGGAAGCCTGGAGAATCCTTACACCACGAGGAACGAATTGATTGGATGGCTCACTTGAGTATCCTTTCCATGAGCAGGATGGTTGTCAACTTTATATCCTTAAAACAACGTGTCAGATGCTACCCCAAAAGACTGAATGCATACTGTATGGAGGACGGAATGGAGGCATAGAGGTGTTGTAGCCAGTACAGAAGGAACTGTGGTACGAACACTCAGGCAGTCTGGATCCAGAACCCCTGAAGCCTCACAACAGCACTTGGTATGGTGGCTCTATCTGCCACCGCAGCTGGATGAATGCCTCAGTT…
LNC_000055	XLOC_006738	lincRNA	chr11:15068555-15089097	-	3	1108	105	GGCGAAGGCTCTGGTTATGTCAGAATTCAATCTTAAAAGTTTTAGCAGGAAAATAGGAGATCCAGTCGAAAGAACATAAGAGAGCAGTTCATCTCCAATTGCCTCCAAGGATGACCTATGGCCTTGCTTGTCTCCTTCCACCACACTGGAGTTGGGTGTCTCGCTCCCTGAAGAAGACATTCATTTCAGAACAACCTTTGATTAACCTGCTTGGTCAAAACATCAGAAGAATCAACAGCAGCAGAAAACACTCAGAAATGTACCTGGAGACAAGCAGTGGAGCAAATGTCAAATTGACAGGACCTTTTGTTCTCCTATTACTTGAGCTGCTCAAATCTCAAGGTCATGGCACCTTCTTAGCTGTTTTTGTCTGAGAGTAGTATGAGTAATTTTCCCCTA…
LNC_000059	XLOC_007012	lincRNA	chr11:48853695-48855639	-	2	1116	97	GGCGTGCTGGGAAGCGCTCCCTCCTCCTATGCATCCGACCCAACCTTCGTCTAACCGGCTTTGATTGCGCTGGTTCACTTCATAGCAAAAGAGAGTGCTTCGGGCTCCCTGTCGTTTACATTCGCAATCATTCACTCAGAGCCGGGCCTCGGGTTGAGTTTTCTGTCGATATCAACAGCTGTTATGAAACAGCGGGCGACCCTGATTGCTACTCTCCCCACTCACCGCGGTCACCTCCAGCCTCCACCCGCTAGAGATTGTCTTGCTCTCGTAACCTGGATGTAGATTGTGTTTTCGAATCCTGAGCCTCCTACGACAACCCACTCGGGGCTTTTCTGAGGTCCCCATTCCTCTGGAATATGTACGAGCCAGGAAAGCAACGTTATCCCCAGACACCTG…
LNC_000060	XLOC_007288	lincRNA	chr11:68818656-68819974	-	2	1223	109	AGCGGAGAGACTCAATATCTACTGTGGGGCCAGGGGTGGGGTGGGCACTGCATAGATGAGACAGGGCAGCCACTTGCCCCTGTTTGCAGAAAGGACAGCTCAGAGCAAGGCCAGGACTGGCCATGGGACTATTATCTTTTTCTGTTGTGCTCTCTTCCCAAACGGGAGGTTTAGCAATTCGATGTGTAGTGCGGACCCGAGGCATTCCTCCTGCCTCAGCCTCCTGACCCCTGAGCTTGATAGCTGCGGTTCACTGGGCCTGGCTTGAAGAGGCACCTGCAGAAACAACAGTCTGTTAGCGCTCCTGTTGGGGGACCAGATGGAGTTTGTGCTGTTTTATGATGATTTATTCCGCTGTCCATCTGCACCCACAGGATTTCTGCTCGCCTTTCCTGTCAG…
LNC_000065	XLOC_008229	antisense_lncRNA	chr12:8521179-8599066	+	2	5521	206	GACGCCTTGACTTAACCCAGGATGAACAATACCCTAAGCCATACAACCAAACTTTCCTTTTCTTTCAGCTCGAGTCTGCCATCTCAGCCATACCCTGTTCCTCAAGAGCCGCTGGATGGCACACAACAGTTTGGCACCTGAACAGGGACCTGAAGAATGGCAGAAGGACGCTGAGAGAACGCTGTCCATGTGGAGCTCCATGGGAAAAGCAAATGGTCTTCGTATGGGGCACCAGAGCAACAAACAGGTACATGCTAGCGCTAGCTTAAAACTTCATTTTTTAAAGTGTAGCTGAGGGTGTGGTAGGATACGAACTAAGCTTGAGTCGGCGCTTAACCCAACACTGGTTCTGCTTTGGTCAGCAGCGTATTAATCGGAACTAGAAACTGGAATCAGGCA…
LNC_000080	XLOC_008443	lincRNA	chr12:30849442-30855371	+	2	5266	154	AACAACCTTGTGAAACCCCACTGCCAGATACCTGCTCTCAAACATTGTTTAATTTCGATGGACAGCAATCAGTGGAGATCAAAGCACTGAGAACAAGACACTCGAAGCTTTCCCTCAAACAGTACAGCTATATTAACTCCACCACCACAGCTCAGAGAGCATTGCAAAGAAGGCAGAAAAACTGTAAGAGATGAAGGATGGGAAGGAGTGCTGTGAATTCCTGTCTTCTGAACATGAATGGCTGTCAAAATTATGATCTCACATCAGCTGTGGTTACCTGCACAAGACCGTAACAAAATTAAGCTAGCAGAAATAAATGAAATCGATAATTTCTAGTCCCTCCTCAATATTGAGGAGCTATTGGCAGTAGATAGTTAGTGGGAAGGGAGAATTATGCTT…
LNC_000096	XLOC_009256	lincRNA	chr12:32748682-32770899	-	2	4725	130	GGACCAAGGGCAAAAGGGTAGAAGGATTCAGCTAAGCACCAGTCTGATGCACATACTGTTCAAAGACTGAGAATCGCCAGGCTTTCTCACGTGTGTGGACGTTCTTGAAACTGTGAATACACAAGAGCAAAGATGGAAGCTTGTTATTATTTATCCAGCCAAAAAACAAGAGACCCAGAGTCAAGAGATTTGTGGAAGACTGCAGGAAGACAAATGGAAAGAGAACTTCTGGATTAGTGCAAGAAAAAGAAGAGTTTTCTTAATGAGAGGAATTATATTGCTGTAATACAACAATATAAACAAACAACAAAAATCCCCAAACATAAGACCCACTCATCACTACCTTGGAGACTCAGAGCCATGGGATACATGCTGAGGAAAGCTGCTAACAGAGAGTGG…
LNC_000106	XLOC_010528	lincRNA	chr13:54237772-54244199	+	2	6340	136	TAGACAGCCAGGCAAGGCTGGAACCTGGGAGAGGCATTTTGCAGTCCCGATCTGCAGGCTCTGAAACCCTCAGCGTGAACCAGATGAGAAGCAGAGACTTGTAAGTGAGCCACGGTGGAAAGCCAGGAGGGAAGCAGGGGTCCCACAGACTGGCTGAGGCAGTGTGGGGATCCATGCAGGGTCCCAATGGGCAGCTGGTGTTCAGCCGCTGCAGGGTTGGGGATGGGGTGCCTTATCCTACACGGAATGTAGCAATTTAAGCAAGAGAGGGTTAATATAATAAGGTCTAGGTTAGAACAGAAGCATTGAGATTTCAGTTGGGAAGCTTAGGGACATCGGAGCAGAGGCAAACAGTGGGACCGTCAGGGTGAAGAGTAACGCTTTTTGTCTTAAATTGAA…
LNC_000115	XLOC_010942	lincRNA	chr13:108563649-108565415	+	2	1646	88	AGACAGACAGACAGACATACAGAGACAGAGACATGGAGAGATGGAGACACAGAGAGATGGAGAGACAGAGAGTTGGAGAGACAAAGAAGGTAATATTATTCATCTCTAAAGAAAAATAAAATCCTAACCTTTGCAACACAATGAAATGGCAATGAAGGCATTAAGTTAAGCTAAATAAGTCAGGCACAGAGAGATAAGTACTACTGAATTTCCACAGAGCATCACAAACTCTAGCAATTACTAGAGGTTGGAAAGGGGCGAGGAAAGGGTTTAATCAGTGCACATAATAGGAGTGTGATGAGGTATTCCATTGAAATCTGTTTGTACAGTTAGTAAATGCTAATTTAAAAGGTAAGGGGATTTAGAGCCACACTTCATTTTTGAAGAATGTAAGAAAAG…
LNC_000126	XLOC_011771	lincRNA	chr13:71553190-71555425	-	2	497	58	TCCATGGGACAATATTGGTGACACGAGTTTCTGAATCTGTCTGCTCCCAAGAAATGCTGAACCTTCCATGTTGTATCTTGAGGGCATTGTTCATTTACTTATGTTCTCTAACTACTTGGTTTATTAGTAACCTTGAGTATAGAAATATAGTTTGTTACTTTTCCACCCACAGCTCCTAATTGAGTGCCTCGTATTTACTAGTTGCTTATTTCCAGAGAAAGTAGCCCAAAGTGGGCCTGGGAGTGCCCAAGTCTGGGGACATGCTGGCCTTTAACCCTCAGCTGGGATATGACCAGATCTGGCACCACATCATAAACAGATTTGTTTGTTACTCTTTACTGATCAGGAAGCTGGGGAAGCTCAGCAGTGAAGGTTCCTACACAGAAGTCTAGCAAGATT…
LNC_000128	XLOC_011944	lincRNA	chr13:98833959-98838274	-	2	3353	122	GATTTTAGTTTGCTTCCTGCAGCAACTGCTTCTGAAGATAAAAATACTGATATTTTAGTGAAAGTGCAGTCTTACTAGTTTCATTCAAATGTTTTTTTTTTTTTCTCAGTTCATAGGACAGTTCTATCATTGAGTGAATGGGTCCATCCATTTCTGACTGGCATTTTTGTGACGAGTTCATAATCTGACATGAACAATTTTACACTTTATGTGATTATTTAGGGGCCATGATTAAAGGGGCAGTGGGACTACACAGAGAGGACATTTTATAAAAAGATTACTGTGTTTTACTAGTAATGTGTTAATGTTTCTAGGCAGTAACATCCAGATTTGACAGTTAAGCTAAATAAATGTAGCTACATAATACGTGACTTATTTTGTAGTTTCTACAATGGTCCT…
LNC_000132	XLOC_012272	lincRNA	chr14:19708029-19733194	+	2	5872	164	GACGAATGACAGCCATAGAAGAAGAGGCATCATCCTGTCTCTAAATGGCAGGAGGACTTTGTATAAGCCTTCCAGACAATGGAAGCCATGTGGGCGAAGACTCAGGAGCCGACCTCTGTCATAGCAGCCTTTCAAACATGATGTAGAAGCGATATTCATCTTACTGGGCCCGTAGACATGAGAAGGTATGTCTCCAGTTCTGAAAATGAGCAGAACTTATGTTGTATCTTACAAACACAAGGGGCAGAGACCAGATTTCATGACTATTACTAGAAATCTCAGACAATGGATGAATCGCCTAAAGCATCACTTGAGTCAGAAAGCCAAGTATCTAAAAGCCAAGTAGCTAAACCCTTAGCATTTATCTCAGAATACTCGGGGCAACCTAAGTGGGCTGCA…
LNC_000139	XLOC_013164	lincRNA	chr14:123151674-123257847	+	4	680	89	CAGCCAGGCAAAAACTAAGTCATTACTCAGCTCACATTACTTAAAATCATGTGAAGACTGATAGTGCTACTGTGAACCATGGATCAATTTGTCAATGAGTCAGGAGAAAAAACAATCTAAAAGCTATTGAAGGCTGATAATCCTCATCATTTTGAATTCATGCTAAAACTCCACTTTTTTCAGCTCCAATTTTTATCATCCAAGGTCTCTGGCTGAAAGGCCGAGTTCAGGGTGTGATGAGATTTTGGCATTGTTCTGCCATAGTCAGACTTTCCAGCGTGAAGCACTAATGGATGCAGGAACACTCAGAGTGTTGGAGAATTGTTCGGATAGGAAGGTTTGGAATTTTCACTTGTATCTCTGCTCTAATGCCTTTGAAACAGTATCTATAAAGTGTGG…
LNC_000153	XLOC_013968	antisense_lncRNA	chr14:75642258-75671074	-	2	666	221	AGGGCCTGGAGGGCCAGGTGGCTCTGAGGCTGTGGGGATGCGCCGTGGGGTACTCTCGTCATCAAAGCAAAGAAGTCCCTCTGCTTTCCTCATGCCAGGAGCTCCCCAGAAGATACATAGCAGATTCCCCTCTAGACATCCTTTCCCTGCAGACACTCAGCATCTCCCAGATACTTCTCAAGACATCCCTTCCTGCAGATACTCACCATCTCCCAGATGCTTCGGAAGACATCCCTTCCTGCAGATACTCACCATCTCCCAGATGCTTCGGAAGACATCCCTTCCTGCAGATACTCACCATTCCCCAGATGCTTCGGAAGACATCCCTTCCTGCAGATACTCACCATCTCCCAGATGCTTCAGAAGACATCCCTTCCTGCAGATACTCACCATTCCCCA…
LNC_000166	XLOC_014414	lincRNA	chr15:52183861-52188694	+	2	4053	83	ATTTACTTAAAGACACAGGTTAGCCCGTGCAGCTCTTTTTCTCTTCCTTGATTCTTGGGGAGCCCTACTACAATGCAGCCTCGGATTAAGAGAAGGGTGGTGTGCTGTGTGATGAATGAGACTTGAAGGAAACCAGTCTGGTTTGGTGGTGCTGGTATGATGGGGTGTTTTACAGCAGTCTCCTCAGAAGTAAACATCCCTCCAGGAGAGAAGAGGAGAGTTCACCATACCCAGCAGGATCCACCTCCTCATTTCAGATGAATTTCTCATTTCACCTGTGACAGGAGAGGCCTGTGGAAAAATACTGAAGACTCAGCAGTCAGAACAACACAATGCCAGGACTAGAAGGATAGTCACACGATCCAAGTGGTGTCAGTGATAGCCAATGGACGTGTGTGA…
LNC_000167	XLOC_014453	lincRNA	chr15:60781417-60799484	+	2	12405	183	CAAGCGCATATAGTCCACACTGGGCTACCTCCAGAACCTTCTGCTCTTGGTCCTGATGAGGTTCTTCCCAACATCTCATTACCTGACTCAAGACTGCTGATTTCAATGCACTGCGAATATGAAGGTAACCCATTTATTCTCTCCAGGGAATGCTGGCCTGCTCCTTTTGAGCAGGGGCTTCTGGAACACGTGGCTGGAAGTAAATGGATGCTTTCAGCTGTTTTCATTACAATCCACCCCTTGACAACTCCATTTTATCAAAACTGCTGGGTAACACTATTCTCTGTGTTCAGGTAGGTTTCCCAAATGCATAGGCAGGAGGTGCAGGAACCCAGGGGAGGCTGTGGTAGGGACAGAATTCCTTAAAGAGGACTTAGGTGCTAAGATCTTCCATGCTTA…
LNC_000172	XLOC_014739	lincRNA	chr15:88875692-88878610	+	2	2812	119	ACCTGCCCCATGATACTCATACACGCGAGGGCCCTCCCCCAAACACCCGAGGACAAACGTGTGGGAGCAGGCTGGGTCTGTGCTGACCGGTTAGGGCAAGAGGACACTGCTTATCCTGGTGCAGCAGTCCTCTAGGACTGGGTGGGACTAGGGATTCCGGTTGTGGTCCGCTGGCCTTCCCCTGCTCCCCCCTCCGCCCTCCTCCAGCCTTTGGGACATTGTGTCCCCAACACGTGGTCAGCTGAACCCTGCCTCCTCCTCTGGCAGGTACCTGACTCTGCTAGCCAGATTAGTTGTGGGCACCCTGAGCCTGCTATGGGGCCTGAAGAGGGATGGGCCCCAAGGAGGAGGACCGACAAAAGTGACCCTTTGTCCAGGTCACACCAGGACACCTGTGGG…
LNC_000174	XLOC_014857	lincRNA	chr15:99888131-99901101	+	2	3265	121	AAAAGAACCAGGAAACAAAACAATATGAAGGAGGAAAGCTGGTTACAAGCTGGAGAGATGGGTTGCTCTTGCAGAAGACCAGAGTTCAATTCACACCACCCAAATTGGGGCTCACAATCATCTGTAACTCCAGTTTTAGGGGATCCGATGCCCTCTTATGTCCTCTATGGACAACAGGTATGACTGTGGTAATAGGCATGCATGCAAGCCAAACACACAACTACATGCATATATGCCACATATAACATATACACAACTACACACACATACACACAACCGGACACATCTACATATCTGTAGATACACCTACACACACACCTACATATACCACACAACCACATACATACACACAGCCAGTGTGTGTCTGTGTGTGCACCAGGACCTCTATGAGGTCTGAGG…
LNC_000176	XLOC_014951	lincRNA	chr15:103090000-103102111	+	2	5496	202	GGAAAAGATTCTAGACAGAGAGGTCCTGAGGGTGGCAGCCAGTGCAGTCAGAGCTCGCCAACTTTGATATGCAAGGGCAGGTTCACCCCCTGACCCACACAGGAGGAGTTTCTGGGATGCATCCTATCCCCTGCTTAACAAATTCCTCCTGAGCTTCAGTTATATTTTGGCAATGTGCTGGGTACAAGGTTCATAGTCACTCCTGATCTGAAGCAGCTTTTAGTTACACAGGAGGCATTGATGCAAGCCTCCCTCACAGGTGCTACAACAGAGGGAACATCTGTCACCCTAATCTGGGCAGTAGTGACAATCCCAGCACCCCAGCCCATACTGGATTCAGTGGGCTTGTGTGAACCAGAAAGGCAACCTTGCTTTGCCTGTCTGGGCATGGCATGAACG…
LNC_000182	XLOC_015080	antisense_lncRNA	chr15:32174585-32182138	-	2	2929	132	AAGCAGTTGCTGCATTACCGATAGACCCAGCTGTGCAAACAATATACACAATTGAAGAATGATTCGAGAAGTTGCCAGGCAAAAAAGAAGCAGATCCAGTGGGGCCATTTTCTTCCACATGATCAAGTCGATGGCATTGACAACCACAATGAGGCCATTTGCCAAGACCCCAGTTAAAAACTGCACTACCACAACCAGGAGGAAGAAGAGCATATGACCTTCCATCGTTTTAAAATAGAAGAACCAATGACTTCTTTAAATGATACATAGAGTTATGCACAGTCTCAGCCATGTATGATTTCTGCTTCCTTTCAACTAGACCAAGGTTCCTTTGGAGATGATGCCAACCCAAAGACAATGGAAGAGGAAGGTGGGGCCCATTTGTTTATAGTGCTGCCT…
LNC_000189	XLOC_016230	lincRNA	chr16:65665077-65689018	+	2	17670	192	GTCTTGTTTTCCTCCTTTCTTCCTGTACTGTGTGATGGTAGCCGGGGTTCCTTGTGTCTATGGCAGGCCTGTGCTGTGGGGTAGAGGGCAGAGTAAGGGATGTTTCAACTCAGAGGAAATCACAAGAGCAGAGCATGGCAAGATCAAAGATTATATCAACCCACCTGTGAAATATCAGAAACTGCATCTTGCTGAAAAGACAAAAAACTGCATAAAATATACCTGATTGGATATTGGCTAAATATTCTGAACAGAATAGAATATGACTTTGTAAAAATGAGATGGAATAATTAAATAAATTGTCTTTTATCTTTCATTATTAGACAATAACATTTCCCACATCTAAAAGTCAATATTAACTTAGCACAATCCACATGTTGTCATTAAAATAAATGAACT…
LNC_000197	XLOC_016494	lincRNA	chr16:6009247-6012550	-	2	1288	88	GGCACCTTCATCGAAGGATTCCCCAGAGATACAAATCTTAAGATACAAATCTTAAGTATCATGTTATGCTTTGGATTTCAGATGTCCACAAAGCACAAGATGATAATTGCCATCCAGGCTGCATCAATGGAAGATGGCAGAAACTTGAGCAGATGGAGCCTCATTATACGGGGGGCCTCATTATACAAAGCTGGGCACTGAAGGTAAGAATTTACCTTGATTCTCAAGGAAGACTTGGAACCTGGAATTATGAGCAAAGCTGGAAACCTTTAGACTCTGGAGATTCTCATACATGAACCAATGAACTTTGTATTGTACATGGACGTTAACTAGTGGGTACCAGGAGAAGAGGAGAACATGGTGACTTATCCCTGAGCTGATCACCAAAGACAATTCAGT…
LNC_000201	XLOC_016622	lincRNA	chr16:20444863-20471092	-	2	7536	130	GTAAGAGAACCCCAAGACCAAGGGAAAAAAAATCACATTTTCAACAACAGGCAAGCACACTCATCTGAAGTCCATTTGGTCTGTGGCCGACCAGCAGCTCCCGAGGAACGGTACAACTGAGATGGCAGCTCGAGGTGAAAGAGAGGAACTAGACAGACGGAAGAAAGAACGGAGCCAAGTCAAAGTGGACTCTGATCAAAGCTCAATTTTACTATTCCAACACGCAGTTATGAAGGAGGGGAAGGGGGGGCCGATTCCCGCCAAATAATCCTGGAGTCCAGTAGCAGGGTGACCACGTGTATGGCTCCAGAACAGCAAAGCAGCAGGTTCCAGCAGTGGGCGTGGCAGAACGATTGAGGGGCAAGCTCCATCCAGATGTAAACAGTGGAACCATTAAGG…
LNC_000205	XLOC_016824	lincRNA	chr16:49522249-49644589	-	8	4475	165	GAGAGCTCTTACGCTAACACTTTTCATTCATCATTATACTTTGCTAGTTATGCATCTAACATTTGCCCCTTGGATTGCCTAGCATTTGACTAGAAGGTATGAAGTTCTAACCAAGAAGCTGAGATGCACCTCATCTTCTTCTCCTGGACCCCAGCAAGGCCATGTCAAGCAAACCTCTGCGAAGAGGACCACCAACAAGGGACCGAGTGTTTAATGACCAGACCATGTGCAACATTTCACATTCAAACCAGAGACATTGTGTGCTCCACTGCCCCCGTTTTCACAGCAGCCTTGTGGTTTACACTGAGGTACTCACTGGAGAAATCAAAGGGAGACCATTTCACTGGTGTGCAGTCAGGAGCAATTTTCTTGACCAAATCAAGATTTCCATGTTCCTGG…
LNC_000209	XLOC_017101	lincRNA	chr16:95188755-95197696	-	2	8871	135	CTCCTCTGTGTGTGCACGGCATCAAGGCCTCCCTCCCAGGCCCTGCTTGTCTAGCTGCCTTTCCAGCCTATGGGAAGAGGCATGGGCTTCAGATGGATGCAGGACAGACTTCCAGGTGAACCAAGTCTGTAAGCGGCTGGCTTATGACATCTAATGTAACCTCATTGTCGTACATCAGCTCTGGGTAGTCAATGCTGGGATATTTGCCACTCTCTTGCAACACGTAAGCACTTAATGAGATGATCTATAGAGAATGCTTAGCACATAGTATGGCCACAACTCAGAGAAGTAGCTCTCTCTCCTACTCCTTGGTCTCTTGTGATCGCACAACTGAGCTTGGGTAGCAATAAAAAAATTCAAAAGACTCCAGGTTTAAGGAGAGACCCTACCCCAGTGTAT…
LNC_000211	XLOC_017820	lincRNA	chr17:43090663-43098547	+	2	7436	113	CTGAGAAGGTTAGCAAGGCTAGGTTTGAATCCGTGTTGTGTATGTTTTGGGAAGAAGGGTAGAGCGAGTGGCTGTAATCTAAGACTGTTCATTCTCTTTATAAGATCACTGACCAGAAACCTGTTGCCACCTGAAACAGTGGGCAGAAACATGGCAGTGAAATCTGTCTGGGTCATGAGTAAAGTTCAAATGCAAGTTAAGTAAGTGGTACAAACGTAGGCATGAGAACTAAACATTAGCATTATATGGTGATCCCATGATGCATAGCTTTCCCAGAAGGCAATGCACCATCAGCTACTTTCTTAAAGTACCCAGAGTCAAGTGTGATGGATGGCACACACCTGGAACCCAGCACTCACTTGCAGGCTGGAAGACCAAGGCCTTAGGGTCAGCCTGGGG…
LNC_000215	XLOC_017824	lincRNA	chr17:43226297-43233572	+	5	4292	149	GAAATGTTTACTAAGTGCCAACAACGTGCCAGGGACATTTAGACCCGAAGCAAACAACCCAGACAGGGGGTTGTTCAATGAACTCGGAGCTCTTTGCTTCAGCTAGAGTAGCGGCTAAGTTTCCTCTTCAGATCCAGGAAGCACCTTGGGCCTTGTGGAGCAACTGTTTTCCGCACGATTTGCCCTTCTTTTTTTTCCCCCCTATGCCCTGTGTAATGAAGAATGCAGCTCAGAGCCATTGTAGCAGTTCACTCTGAATGAGGGTTTCTCCAGGACTTGGTTCTTTTAACGACAGAAAGACCCTTGAGGACAGCATGCAGCAATCTGGAGATTTACAGTTGTCCCTGTTCCGTGGTCCTAGCTCAGTGACTGTTGAAAGCATCTTCAGCTACAAAGGAA…
LNC_000223	XLOC_018771	lincRNA	chr17:45865164-45867996	-	2	2697	151	CCACCCAGAGCTTTCCAACAGCTGCTCAGAAGGCTAAGACTCCCTGGAAGACTCAAGGGAGCAAGGAAGGAGCCGAGCCCAGGCAGTCTGACAAGGAGCTCCAGTCTGAATACAGATGAGCCAAGCCCTTTGGAATCCAGCATCAGTCACTGCCCTCCCAGTCCTCATATCTCCTTCAAGTCTCTGAAGTGCCTGCTGTGTGCCATGCCACGGGGCCCACCATTGTCTAGGTCCCCGTGGTCCGTGCGGGGACAGAAGTGGGCAGTGCGCATCCACAGAGCCAGTCCACATCCCAGAGCTTTCCCTAGCAGATGCTAGGACCACAGAGATGACCGAGTCACGCTCTGTCTGCAGCCAGTTCAGGCTAGCTGAGGACATGAGGAGGGAGCTCCACTTCCA…
LNC_000225	XLOC_019169	lincRNA	chr18:11015420-11019025	+	2	2971	105	CTGGGATATGATGGCTCATAACCATCTAACTCCATCCTGTCCAAGGGATCTGACATCCTCTTCTGGCCTTTGTGGGTGCTTTATGCATGTGGTGCATAATATATAGACATACAACGCACATAAAACGAGAATAGATGAATCTTTCTTAGAAAGAAAGTCAAAACAAAGCCAGAAGGCACTTTTTAGCTCTCTAGTCTGCAGATATCATTTGCATATTACAAAGTTGCTTCTTTCTGACCATAGTTCTGGCCTCTGTGGAAGAGCTTAGGATAGACTGATATCAAATGACTTCTCCTGGCACATCCTCAGTCAGATTACTACTCTGTTTATGGTACCACAATTAGAGGCATGTAATTATCTAACAAAAACAGTATAAATGTTACATCATTTATAAAGCAG…
LNC_000226	XLOC_019507	lincRNA	chr18:62040938-62146875	+	3	844	80	GTTCCAGGGAGCCCTAGAAGCACACAGAGCCATCCAGTTCCCTTAACACGCTGGTGCCCAAAACACATATATGTCAGCCTAATACCCGAGGACAGGATCCAGGCCTGGGGGCACTGCCATTCCAATGCGTCAAAGACAATCTTGTCTGGGACAAAGATGGAGCCAAGATTAGGCTGTGCCCCGTTGAATTCCCAGGCTCGGTCCAGGAGAACCACTCTCCATTCTCACCCACCAACTAAATGAACAGGCCTGTACACATGCAAGCAACCCGACAAACCAGCAACCAGCACAAGAAAGACAAAGGCATGGCACGGACTCCCAGGCACGAGCCAAGCTGACTCACTTACCGGAGGCTGACTTACGGGAAAAGAGAAGCCAGCATTTGATCTATGCACAAGT…
LNC_000228	XLOC_019625	lincRNA	chr18:80534378-80536396	+	2	1511	98	CAGGCACAGGAGGTGAGGGGTAGGCAACAATATGGCTCAGTTCCCCCATGTGGGACAGTCTAGTGGAGGTGACTCAGGACCTTGTAGGACAGAGTAATTACGCAGTGGCCACCTTCCCCCCTAGCCTGAGACTTCTGGCATTCTTGGCTACAGGCTACATGTTGCTGGCCTGTTCCTGGCATGTAGCACGGATGAAGGAGGAGGGCCAGCGTGTGGGCATGGGATTCGAGGCCTGCATCTGTACTGTTTCCTGGCTCACTTGCAGGATGTGCCTCATTGTTCCTGGGTCAGCAGCTCCTGGCATCTGCTAGGGAATCAAGAGATCTCTTAGTAGACTGACCATGCTTGGACAAACCGGCTGTCCTTGGATGGACCTTCTATCTCCATACACACCATCTG…
LNC_000234	XLOC_019845	lincRNA	chr18:38118519-38121212	-	3	1950	163	CACTGGCCTTGTGACTGGTGGAGGCTGAAGGCTGTCCCAGGGCCCCCCGGGGATGTGAGGCATGGTCTGTGGAGTGTTTGTGGATCAGCAGAATGGAGTCAGAATTTCAACATGGAGTCTCCTGGGCCCACAACCTTCTGCTTTCTCGTTGACTCTGAAGATGGTCTCCATCATCTATCATCACCAAGGACTCAAGCCCCAGGCCAAAGGCTTTTGAGGGCTTTGCTGTTGAAATGATCCATGGTCCCAGCTATGACAAAAACCCACACGGAGAAATCTCCAGCAACAAATGCTTAATGAAGTGCCAGCAAAGCATCACATTATGCAAAGCTGCCCAACTCATCCGGCGCCTGGTAATGGGATGGAGTGTGAAGCTGGGCGTGGTTATGGAAGTTGATG…
LNC_000244	XLOC_020481	lincRNA	chr19:36359224-36363325	+	2	3010	194	CTCAAATTCACCTGCCTCTCTCTGCCTCCCTGAAATGGGACTAAAGGAACATCCTGCCGTGCCCCCAGGTAGGGCATTTAAAAAAAAAAAAAAAAAAACTTGCAGATTCTTTGCGTATATGTGATGGCTTCTAGTTTTGTGTTTTTATGGGATTCCTGTTTGTACAAACGTGTGTGTGTCTCTGTGTCTATACGGGGTTCGTGTGCTTTCATTTGGCTCTTGTTTTGTCCTATTTCAGTTTGTGTGGTTTTGCTATATCATATTTTATTTTATTATTGTTCTAGAGGTTTTCTCTTAGTTTTCTAAGGACAGACGGAAAAGTGGTGGATTCAGATTGAAGGCGATGTGTGTGGGGGGGTATTGGGGGAATTGGAGGAGGACACTATCATCAGAATATAT…
LNC_000248	XLOC_020702	lincRNA	chr19:3981654-3986389	-	2	1431	134	AGGTCTCTGGGGCAGGTTCCTGTCCTTGCCCTCTCCTCTTTCCCCCGGAAAAGGGACAGTTTTACTTGCAAGGGTCTCTGGGGACTTCTGCTGGAAGCTGCGCTTGCCCAGAGATTCCTGACTTGGAACCATGTCTCCCAGTCCTCAGAAAGGACTTGGCTTTGCACTGATGAGTACTGGTGGTCCACTGCTTGGTCCTTTAAGGGTAGACAAGGCCTGCCTGGTGTCCACTCCGATCCATGCAGAGAGGTGCTTTCCTTGAGGCTACTTAAGGCAGACAACAGTGGGCAGTGACTTGATTTTGGCCACAGCAGCCCTGTACTTTGGGGGCCACCGGAAAAGGAGTCCTCTTCCCTGCCACCTTCCCCTGCACCGGCCTGTCTTTGCAGCCCACAGCCA…
LNC_000264	XLOC_022182	lincRNA	chr2:86018365-86039901	+	2	21384	292	TGAGGAATAAAAATTTTTACTGAACTCTTTTTCACCCCAACCCCCTCCCATCTAGAGATTGTTCCCAGAACACTCCTAAACTTTTCACCCCAAAACTCCTCACCCTAAAGTTCGAACCCTCCCAACTAAAGACTGTTCCAAGAACATTTTTGAGATAAAGGCCTCCTGGAACAACCTCAAAATAAATGAGGAGGACATGGCTCCTTAGTTACGTAGATTCCTTTGGCAGAACTCCCTAGTGATGTAAACTTGTACTTTCTCTGCCCAGTTCTCCCCCCTTTGAGTTTTACTATATAAGCCTGTGAAAAATTTTGGCTGTCCGTCGAGACTCCTCTACCCTGTGCTAAGGTGTATGAGTTTCGACCCCAGAGCTCTGTGTGCTTCCATGTTGCTGCTTTA…
LNC_000267	XLOC_023063	lincRNA	chr2:166194587-166203054	+	4	7042	197	GTTTTTGTTTTTATGTATCAACTCTGTTCTCTTTGTCTCCACAGCTCCAGCACCCGTTTAAGTCCTCAGTTTTACCGTAAGGACCCAGATTCATCTACAGGGCCAGAGTGTGACCTCAAGAGGGTGGTGTCAGCTCAAAGGCCACTCAGCTGCTCTCAGCTGTCTTTGCTGGAATGGAAAGAGATCTTGTTGTAAGAGGAGCGTTGGATGAACCAGCCCCAACCCAGGGTCTAGAGTTTGAGGAGTGACAAGGGCAGATCTCTAAGGAAGCGAAACTCCTCTGAGACCCGACAGGGAACCAGCTTCCTCGAGGAACCTGAGTGAAAGGAGGACCTGTCACCTGAGCCTCCTCAGGTCATCCATCGTCCTCGAAGGATCCATCCTGAGGCATCAACTGAA…
LNC_000269	XLOC_023130	lincRNA	chr2:173177596-173183987	+	2	5489	196	TTTCAGCTTTGCAGCAAGCTGCCCATGTTGCAGAATCTCCTGGGAGAGCCGCCTGTTGGCTGTCCTGGATACAACTGTGGGTGTCCACACTGGTGGAGGAGTGGTCAGGAACACTGGCCGTCCTTCTAGAAGACCGGGACTTGGTTTCCAGCACTCACATGGCAGCTCACTATCTTCTGTAATGCCAGTTCCAGGAGATCTGTCACCCTCTTCTGGCTTTTGCAAGCCCCAGGCATGCAAATGGTGCACATAAAACGAAATATACAAAACCCATAATATAAAATAAAATAGGCAAAACACATAATATAATATAAATAAAATTATAAAATAAAATATGCAAAGCCCATAATATAATATAAAATATGCAAAACCCATAGTATAATATAAAATATGCAGAAC…
LNC_000270	XLOC_023140	lincRNA	chr2:174019247-174022284	+	3	671	84	TGTGAACCTCAGTTGCTTTGCTGTTGCTGTTTCTGGCAGCAAATGGAGTGGAGGAAAGCTTAAATCCTTGGCCTTTAGAGTTGCGCATTAGAGGTCAAAGCTGCCCCTTCCTAGCTGTAGAAGAGCTGGTGTGTACGCGGTGTGTATACTTGTACCTTGAACAAGTCAGCGAAGCAAACAGCTCTGCCTGTTGGGATGTACGAAAATGAAGCCCGCCATGGGGAGCCTCGAGCCGCGGAGCTGAAGGCCTGATGTGAGCTGAGCCATGAAGGAAAGAGGATGTTGCAGTGAGCGTTGATGCTGAAGACTACCTGCTGGAGAAGGCGCTTGCAAGAGTCTGAATTTTCCCTGAGACTCAAGATGACTCACCACCTTTCCCTTTTCCTTTCTTTAAAACAA…
LNC_000274	XLOC_023394	antisense_lncRNA	chr2:22774093-22878907	-	2	2646	98	GCTTAATAAGTTAAAAGTTAAAGTTTAAATAATGATGTTTGCAATTTTATTATTGTTTTGGCCACAGGCCTGGGAATTAGGGGAGTTTGAAACTTTGGGGAACAATTGTAATTCTTGATTCTTTGTGGGATGTGGTTATTCTTTTGAATTTGATTTGGAAGATATTATACAACTCTTTTTTTCTACATGCTTTTGGAGTATCAGTAAAAGACTGGGGCAAGAAGAAGGTTAGTGCTGCTTCGTCCCCATCGGAGAAAATTCTTTGCACAGTGGCCAACAGTCATTACAGAGACTCACACTGATCCAGGTGCGGAGAACAAGTATCAGTGACGTGCTCACTCATACATGGAACATCTTTGTAATACACCCTCCCCCCCCCCCCCCAAGACTCAGTTCTCT…
LNC_000283	XLOC_023892	lincRNA	chr2:75810786-75815695	-	2	4369	110	GCTATCACAGTCGCCAGAGGGAAGAACGCTCAGGAAGAGGTAAGAAGGGGCTGGGAGGCAGGGCAGAGGCATGCTGACACTGACTGCTTTGTTTTGTTGTTTTATCTAATTTTTCTAATACTGGTTGAAAAGCAAGGGAAATATTTTCAAATAACAAGGCCATACCTAATACCTATTACATTCGAATATCTGGATAGCAGAACCCCAATGTCGGTACTATTTTAAAAGTTCCCCAAGACTTGTTGCCTGAAGACGACGAGTGGAGCAGAAGGAAGCGTCGGCAGTTCTAGGAATTTGTTTGAATCATAAATTCTGCTGGGGCAGGACAGGTGTCTTTGTCTTTAAGAACTTGCCGTGGCCTGAGCTCAGCTCCCCGATATCCATTCACAAGGCAGCTTC…
LNC_000285	XLOC_024474	lincRNA	chr2:127445476-127449908	-	2	3451	279	GTCCGAGGCATTCCCCAGAGGCAGCGCACCTGAAGCTGGGGGAGGGGCAGCACTCTGCCCCCAGGGTCCAGGGAGCCTGGGCAGAGTTCCAGGGTGAGGCTGAGATGCTCCCGTGTTGGGTCATAGAGCTAGCTCTGGGGACCTGCAGAGTCAAGTCTGAAAGGCCTATCTGCCTCAGCCCCCTCTCCTGGAAGCCCAGCCCAACCCAGCCCTCCTCCCTTCTCCCTGCCCTCCTCCCTGCCCTTCCTCTCCAGTGCACAGCACACTCACGAGACATCACTTTTTCCTAGTTTTGAAAAAAAAATCACTACAGTAAAACATACAGAAACTAAAAATAAGGCCCCCAAAGAGCAGGCCGACATTCAGCTCCCGACAGCCAACCAAGTTCAAAAGGTCTGG…
LNC_000287	XLOC_024955	lincRNA	chr2:167847208-167847882	-	2	382	112	GCCCTTTTGCCTAGATGAGTTGTTAAGTGTTTAGCTGCAACTCAGACAAAAACAGTATGCAGAGAAACTCGCACTCTGCCTGCCAGTAGAAACTGACTACAGTGGAGAACAGAGCCATGGGGGCTTCGGGCAGCACCGAAGATGGGAAGGTCCTGGAAGGCCTTCATAGGAGTGGAGCAGAGCTGGAAGCCAGGCTGCCAGGCCAGAAGCCAACTGCTGCAGTCCTGCTTGGATAAGGAAGCTGGCGTTTGGGCTAGAGTGGCTGTGGAGGTGACTGTGAGAAAGTGGGTTTGAGCTGCACTGTCCTCAATCTTCATGCGGGTTCCGGGGCCTCTGTAGACATCAAAGTCCTCAGATGCCCAAGTCATTAAAGGATTCTGGC
LNC_000293	XLOC_025547	lincRNA	chr3:56940121-57028002	+	2	34294	303	GTGGGTTGGGAATAGGGTCGGTAGGCACTGAAAGGGTGGAAAAGTCTGTGGGAGGGTAGCCAAGCTGACATTCTGGTGGCTAGCATGGCCTCTGGTCAAGCAACAGACCAATCTCTTAATTTTCAAGATTAATTTAAATACTTGATACTGTTGTTATGATTTTTTAGTAAAGAAGAATAAGACTTGGAAGTTGTAAATTATTTGTTCAGTGTTACATATCTAATTGGCCCTGAAGAGTGATTGAAAATTTAGAAACTAAAATTCCAAAATCTCCTAAGTTAAACTGATTTTGCTGAGTACATTTCCAACCTTAAAACAATTCAGGTTTCCTGAATCCCTACCACCATGAGAGGTACAGAAAAGTAGAGAAAGTGAGAGTCCAATATAATGAGATGCTTA…
LNC_000296	XLOC_026112	lincRNA	chr3:101667421-101676166	+	2	2942	181	GGAGAAGTCTGAACCAGCTGAAGCTGCCTGGGACAGCTCTGTGGATCCTCGCCTTGCCAGGCTCACCGGGGCTTTAATAATGCAATAAAACCCAGCTTCTAAGGCACACAAAGGCTTTTGGAAAGCAAGAGATAAAAGGGACTTTGTTCTGCTCCCGCTGGGAACAGTATAGATCTACAGGTGTTCCCACAGACACCGGTCCCTTGGTGGAGGCTGTTGCTGGTCTCTGCTCCCCACATCTTGCTGCTGCCTGGGAGCCATGGAAGGCTTAGAATGGAAACAGCCCGCAGAAGGCATGCTTTAAGAAGCACACAATGACAAGAGCAGGCTCGAGAGCCAGATATCTACCCAAACAGATGCACAAGTCACAGCACAGAAACACACACACACAAAAGGAAA…
LNC_000297	XLOC_026126	lincRNA	chr3:102686984-102705575	+	5	8004	147	CTGGAAGACTCTGGGGACTTCTGAAGTCACTGAAAGTATTTTGTACTGTGCCCTGATCGCAAGCCTGTGAAGGCCAGGGAGCGGAGTGTGTGGTTTGAATACAACTGGCTCCCACAGGCTCCTATGTTAAAATACTTGGTCTCCAGTTGGTAAAGCTGTTGGGAAAGAGTGAGCCTTGTTGGAAGATGCATGTCCCTGGACGCAGGCTTTGAGGTTTGCAACGCTTTCAACATTCCCAGTGTGCCCTCTGCCTCCTGATTGTAGACCAAGGATGTGAGATTTCAGCTGCTGTAGCCAACATGCCTGCTACTTCCTCTACTGCCTCGCCATGGTGGATGCTGAATCCTCTTAAGCTGTAAGCCAATTCAATACTTATTTTTTTATAAGTTGCTTTGGTCA…
LNC_000298	XLOC_026126	lincRNA	chr3:102686984-102705575	+	2	3000	112	GGGGGGGAGGGTATGGGGGACTTTTGGGATAGCATTGGAAATGTAATTGAGGAAAATACGTAATAAGAAGAAGAAGAAGAAACACTATGAAAGGTGCCTAATACTCCTCAAAAAAGGGGGGGGCCTCTTTAAATCATGTCATCTCTAGGCTGTCCCTCTTGGGGAGTGAGGAAGGAATAGGAACACACACACACAGACACACACACAGAGAGATACACACACACACACCCACAAGCATGCACACACACACAGAAGATGGCAGCCACTCTTTGCCAAATCTCAGGGTTCCCCCCCCCCTCGGTTCTATAAGTGCCTCAGTTTTCCACTGGGAAATGGGACTAAAGGGTTCAGTACCTCCCTTCCTTCCTCCTATTAGGGTCATGTTGGAGGCTTCTGGAG…
LNC_000300	XLOC_026383	lincRNA	chr3:131492749-131500993	+	3	7152	154	CTAACCTACTAAAGTTTACTAAATCCATGGTTCATCATCTTTTAAAATGCTGTTTGTTTGGGCTGAACAGATGGCTCAGCGGTTAAGAGCACTGGCTGCTTTTACAGAAGACCCAGGTTCAATTTCTAGCACCTGTATGGCGACTCAACAACCATCTGTGACTCCAGTTTAGGGGACCCGACACCCCTTTTCTGGCTTGCACAGGCACCAGGCAAAGCACCTACACACATAAATCTTTAAAGGATAAATGATGTTGGTGACCTTTCTAAAGGAGAGAACGGCGATGGAAATGAAGCTCAGTGACAATGTCCAGCTAGGTTGTGAGTTGGATCCCAACTAAGGAAGACAAATGACTACATTGGCTTCTCTGAAAGGGTGGTGGTAGGCCTGGGTGTGGTG…
LNC_000304	XLOC_026673	lincRNA	chr3:16013705-16014705	-	2	724	107	GAGCACTCTCTGCAGTCAAGTTCTCCTCTTTCAGGGCAGGTGTCCAGAAGTCTGGAGCTCTGATCTACCTCCTGAGTTCTGAGGTCAGAATTCTCCCTGTAGACCGACTCTCCTTTGGCAAGGAATATGCCCAGGGGTCTGTGTCTCATCTCTGCCTCCTGGCTGAGGATGAAGGCCTGATGTGATCCTGACAAAGAAGCTCTGCTGCTTCTATTGTCCATGTGCTATCAGGTTTCAAGATGCCTTCCCAGAACAGCCCCCAGACATGTGAGCCACTGGCCAGACACAACAAGAAGGTCCTGTGTCAGAGACCATCCCGTGAGAAAGTGAGCCCTTCATAATCTCCCTAACAGGCCAAATGGCCTTGTACTAAGAGCTGGTTATCACCCCCCTTCCTCC…
LNC_000312	XLOC_028885	lincRNA	chr4:114326599-114337156	+	3	3803	108	TGAAGACAGACGCTCACTCCTAAAAAACATTCCAAAGGTCACAACTCTTAATACTGAAGCGTTGGAGACTGAGTCCAATGGAAATTTTACAGGGCACATTATCCTTAAAGCCGTAACACTCCCTGGGATATCAGTCTAATTTATTTCCCAATGTCCCAGAGAAGGAATCTGTGTTTCAAGGAAAGGTCCATAAGACAAGCCAACAGACAAACAAAAGTCAGAATAATATATGTACCAGCTACTTCTGAGCTCCAGAATCTTCCCTAATGAAGATAAGTTAAATTTAAATTTCAAATAGAGGACTATAGGGAACCTGGGACACAGAGTGAAGAAACTGCCCTAACCAGTCCAGTGCTGCGTCCAGGAGTATTAGAGCAGAATCACCTAGAAGATATAACA…
LNC_000318	XLOC_029595	lincRNA	chr4:10939792-10943535	-	3	1830	105	GAGGCACAGTGTTTGCCTGATGTGTGCACTGCCAGCTGCAACATGTTTTAACTCATCTGAACAAGGCGTTGCCAGCGTCATGACCTCACCCTGAAGCTGGTTGTTCATTACGCATGGCTGGTCTCTGAGTTAATGTGGAAAAAAAACCCCTCTCTTTTAGTACACATCCCATTGGGAAGCATGGTGGAGTTTTCTCGGGACTGTTTTCTGTGGGGCATGCTTGTAGCTGTGTGTGAGAGCCTGAAGGGACATGCTCTGAGCTCTGCTTTCCCAACCAGACACCACAGCCTGACCATTGTTGCTGGGGTGTAACCGGCCTGGATAGCTTTGCTTTCTTCAGGGCTTGCTCAAGAATGGGCCCCACCTCTGTAACCGTGTTTGGGCTTCCTGAATAAAATC…
LNC_000321	XLOC_029938	antisense_lncRNA	chr4:49059281-49340259	-	2	21904	189	AGGAAACCAATTGCTTCATTTCTAACTTATTCCTTTGTTAGAGTGAATATGAGCATTTAATTGGGGAACATGGGTAGCTGAAAGATGGCGTTTTGGAAGAATTTTAGGCCCATACAGTGATGGCTGGAGAACTATCTCTTCAGTTGGAATTTTCTATAGTAGTTTACTTTTTAGTTCCTCTGTACCCTGTCTTAATCAGCAATATCAGCAGGAATCACAGAATGCAAATGTCAAACATGGGTTAATATTTTAAGGAGGAGGGTTCTGTGAGGCAAAGGGAAAAGAATGTTCCAGAAGGAGAGAAAGCAGATTCCTGGCTCCTGGTCATAGAAAGCTGTCCTCCTGAGATTCTGAATGGCAGAGAAGCATATGTATTCTTTGGAGGATTGCTGCTTAGAA…
LNC_000324	XLOC_030393	lincRNA	chr4:114326599-114337156	-	2	5902	123	ATTTTGTTTGGTAACCTTTAAACTTGCTCACATAACTTTTCTTACCAAATTGCACCTTCTTGTGTATTTCTGATCTCTCTCATTATAAAAGGCATTATAAGAAACAACTGTGGAAAAGCTTGGTCTTTATGCTGTCTTTAGATTTCCTCCACTATTGTAGGAGGTTCTTGTGTTCTGTGTATTCAGAAGCTGATTTCTGTGGCCTAAGATGAAGTTGCAGTCCAGACATGGACATTGTCATGAATATTGGAGAATCTCCTGTATTAATTTGGTATAAAGAATGTTCCTCAATTATCTTTGATAGGTTAATAAAAGGCTGAACAGCTAATGACTGGGCAGAGAAGATAGAAATGCTGGAATTCTGATCCCAGCCAGGGATCTTCCGAGGGAGAAGAGCCA…
LNC_000326	XLOC_030816	lincRNA	chr4:138961425-138965656	-	2	3630	136	ACAAACAACAACAACAACAAAAAACAAGAACAACAACTAGCACCACAGTGAATCCAGAGATGGCTTGTCAGTGGCTACTGGTGTCAAGCTTCTTGGGTTAAACCCTTCCCTCTACCCCGAGGGGCTGTGCCTGCCACAGGTTCAGTCTATGTGTGTGGAGCCTCCAGCAGGCAGAGGCTGCCTGTTCTTGCTTTGTTCCCCCCTCAGGGTCCCCTCACTCTGGATCCCAGCCCCAGTTTCCATTCTTTCTGCCTTAGGCTGGGTCAGCGGGGATTTCTTTCTACCCCAGTTTCTACCAGGTTCGTAGAAAGGCTCCTGGCCGTAGCCCTGGGTGTCTGTGTACAGAATGTTTTCAGATGACAGTGGCCTGTCTTCACTTTGAGTGATCACTGCTGCCCC…
LNC_000330	XLOC_031229	lincRNA	chr5:17275886-17335369	+	7	5728	155	CCCTTTTCCATGTCAGGATTAGGCAAGGAAACTTTAGGATCCTACTTATTGAAGCTGCCTTGGTGGGAAAATTTGGATGCTATTTCTCTGTTCCTGATTTCTCAGGCTCAAAACCTCACTCCCTCCTCTCATCCCAGTCCCACCTTGACATCCCATCTGCATTCCTCCCATGGGTACTCACTCATCCTGGTATATCAAGTTGCAGCAGGACTAAATGTACCCTCTCCCATTAAGTACAGGCAAGGCAGCCCCGTTACAGGACAGTGAACAGAGCCAGAGACAGCTTTTGCTGTAATTGTTAGGGGAACCACAGGAAGATCAAGCTGATCATCTGCACGGACTGAACCTAAGCCCCCTACACAGAGTAACCCAGATTCAGAAAAACATATATGGTCAAAT…
LNC_000331	XLOC_031759	antisense_lncRNA	chr5:87509414-87538195	+	2	10740	265	CTGGTGTTCTATTCAGAAAATTTTCTCCTGTGATGATTTGTTTGAGGATCTTTCCCACTTTCTCTTGTAATAGATTCGGTGTATCTGGTTTTATGTGGAGGTCCTTGATCCATTTGGACTTGAGCTTTGTAAAAGGAGATAAGAATGGATCAATTTACATTCTTATACATGCAGACCACCACTTAAACCAGCATCATTTGTTGAGTATGCTGTGTTTTTCCACTGGATGATTATGGCTTCTTTTTCAAAGATCAGGAGATATAAAGACTTCACAATTTTATGTCAGCATATTTTCTTCATTGATGAAGCTGCACAGCACAAAATGTCAGATACAGACATGGGATTCTTCAGTTGTTGAGCTATCAGGAGATTATGTCCATCTTCATAAGACTGGAGTTA…
LNC_000332	XLOC_031796	lincRNA	chr5:89245520-89254058	+	2	8451	178	GTGAGTGAAGTGGATGGATTGGAAAGTACCTAAAGCTAAACCCTTGATTTTCTCATTCTTTGTATCTTTCCTTAAATAACTAAGTATCAGTACTTCCTAAGACTTAAGGAAATTTCTGTTTCTGATTTCTCCTTCCCATCCTTTGCTAACTATTGTTTTCCCAGATTCTCCCACAGGCCTGATTCCATCTCTTCATATTCTATCACAGCAATCGTATATATATCCTTGTGCATGGCTCTAAAGAACCATCTTCCTGATGATAACAGCCAGTTGTGCATTGTCAGCCCAGTTCATTCTCCTGAACATGTATGAACATAGACTTTTATATTCCCAGACTGAGCCATAAAGGAAGCCACTGGTCACTGTGTAGTGGTTCACCCTGGACATCCTTCAACCCTA…
LNC_000333	XLOC_031797	lincRNA	chr5:89254448-89265797	+	3	6004	125	GTTTTGATTCTATCTTTGCTGGTTTCTTTTTTTCATTAAATGATTGGGAAAATTACCATGACTTTATTCCCATAGGCTGAAAATTAGCCTGCTATGCTGGAGCCCAAATCAGATTCTGATGACTAAGAATTAATCTATTTTCGTGGAAGCATGCGTAACGGAAATCTGTACGGCTCTTCTCTGCCATAGGAGAGCTGTCGTTGCTGTCACTAGTGACTGATATGCAGTGGCCAAATGTGGAGATCACTCAGGCCTGGGTCCCTTTGTTCTCTAACCAATATTGATCAAATTTTGTTGTTCCAGAGTACATCTGTTCACTGCCTTGCTTTTGCAAGCTAAGGAAATCTCCATTTTGAAAGTTAAAAGGTGTGTTTCAAGAGGTCTTCACATCCCACTGAT…
LNC_000353	XLOC_034486	lincRNA	chr6:50535620-50538023	+	2	1351	164	TGAGAAGTTTTCAGACAGTGACAGGCAGCCAGGCTCAATCCATATTTGAGTGCCCACCGCAGACCAAACAACTTTCCTATGCAGAGGGCAGGGCGGGGAAGAGTCAGCCACTGGGAAATGGCTCAGCGTGACTGCATGGCTTCTGACACCAGGGCTCTCAGAGGGGACCCGCTCTCACGTGACCAAGTAGTGACTTCACTTTCTGTGTAACATGGGCTGCACGAGGACGGAGGTTCGCTAACATGGCCGAGATCTCATACTGGAGCAAAATACCTTCATCCTTTGGCTGCCCTGGGAAACCCCCTGGAAGAAGCTGCATAGACTGCTGAATAGACACACTGCTGTTCCTGGCCCTCCTGACCTTAATGAGAGTTGGCTGGGCTACAAGTCAAGAGTGTG…
LNC_000355	XLOC_034780	lincRNA	chr6:72473592-72511752	+	2	1238	97	CAATCCGTGGTCATTTAGGGACAAGTCAGGCCAGGAAGCCATGTGACTCTCAAAAGCTAGCAATCCCAAGCCTTGCTGAGGCCTGTGAGGATTGGCACGAGAGGAGGATGACTTGAGATCCCGATTAGTCATCCTGGCAGCTGCTTCCTGCCTCCCTGCCCTTCCCTTCTCGCCTTTTTGGGCCTCTCTGCAGTGGTAAGTGGATATGGCCTGGACTCATCAATTATTACTGCTGGAAAGCAGCTTACACAGCATCTCATGTGCCTGCTTTATTGGACAGACACATGAGTCAGGGACAGAAGGGAAGAGGATCAACCCAAGCCACTTAGCTGCCTAGCGTCACCCATAGTGAAAACCTTATCAGCTCACGGATCTACCTCATTCACTCCTGGAGCCGCC…
LNC_000366	XLOC_036349	lincRNA	chr6:82011493-82021159	-	2	3508	130	TGCCGTGAGCTTCTGCAGTGACTTCCCACCATGATGGACTGTATCCTCTGAAGTGAAGACCGCAATGGTGCATGCTGTCTGTCTGCCACTGAACTACCATTTCATGGTGTGTGACCCCAAGTCACATGTTGCCTGCCAGTCCTTTAGGTAAGAGTCAACAAAACAGTCCAAGCACTACTCAGGAAAAGGTTCCTTTGTGGTTCATTTGTTTATTACTTGATGCTAAAGTATTCACCATTATTAGAGTCCCTTGTGGTAAGAAAACAGAAGCTGGTCTCACTGATTGAAAAGCGAGACCCTGTTTCAAAGAGGAAGGGGGAGGAGAAGAAGGAGGAGCTGAGGAAGGAGAAAGAGGAAGAGGAGGAAGAGGAGACCCTCAAGCAGCAATTGACACACCTC…
LNC_000367	XLOC_036564	lincRNA	chr6:92215192-92221709	-	2	1229	98	CCTGCCTACGGTAGTTCAGTCCTCACTTGGGTCCTCAGAGTCCCATTTTTAAAGAAGAGGAAAGTGTACCAGGTTCAATAACTCCTTCAAACACTCATAGCTGGGACAGCATTGGAGCAGCCAGGCTCTTGAAGAAGTTTCTATTTTCCTGGTCACAGGTTTGTTCAGGAACTAGACGTTTGTCCTTGGGACTTTTTCACATGGAGTCCCTCCTCTGGGAAGGGGTGGAGAGAATGACCACTGGAAATGGGTCTATCTGAGTGAGGAGTGGACAGGAGGAAAGGGGCTATTCCTGGTTGTCAACTTGACTATATCTGGATGAACTACAATCCAGAATTGGGAGGCTCACCAGTGATCCTAATCTGGAGGCTGAGATAGAAGTTTCTGACCTGAATCTTG…
LNC_000375	XLOC_038017	lincRNA	chr7:61658407-61707623	+	2	4883	134	CCCCTCTTCCAGGGGCAGAGCAGACTTGGTCACAAATAAAAGCAGTTTCATTTGAATGGGTCAGAGGAAAGCAGGAGCAGCAGTAACCATGGAAACACAGGTACTAGGGCATCAGTTTCTCCACCTACGCACTTTAACTCAAAGGGCTGAACGGATAGTGATAACCTAGTCCCTTGTTATAGGGAAAGAACTGGATGTTAAGATCTACAAGGTCAGCTTACATGCATTTGCAACTGCTCACATACATGGAGCCTTTTACCAGGAGAGAAGGCTCCTAACTCCGGAGGGAAAACTATCAAAAAGAAAGATGAGATCCTACAATTACTGAAAGCCCTATGGTTGCCAAAGAGTGACAATCATACACTGTCCAGTCCATTCAAAAAGGAACAATGGAAGTGA…
LNC_000377	XLOC_038130	lincRNA	chr7:71137594-71157560	+	2	13043	146	TGTATGATCTTATCAGTTGGAAGGAAAAGCTGGCCACAAGCTGATGAAATATGTTATATTGTCATGAGAAATTTCCAGAAACCAGTCCTGAAGATGTTCAGTATCTGAGACTGAAATGGGTGGCCTCTATTCTGAGGCCTTCCTCCTAGAATTGCCTGCACACATTTCTCAGGCTGCTGTCCAAGTGATATGTGATCTGCAGTGTGGAAGAAATGGCTCAGAGGTAATAACCCTTTGTCACATGGCATGTGAAGACCCATATCCCTTTTGCTGGATCCCCAAGTGCTTCCTTTCCTCACATCCCAGAGAACAGTAGCCTTCTGTAATTGGATGATCATCCTGCATCCCATCAGCATCCTGTATTCCACCAGCATTTGCAGAGTAAGCAACCCTGTGGGG…
LNC_000378	XLOC_038251	lincRNA	chr7:84430236-84467543	+	4	14806	141	GGGGGAAGAGAGCAGGTTTATATTTCAGTGTTGTAGAGAAAAGCTGCCTAGCAGTAATTAAGCCTCCTGAGTTAGAACTTAATAAAAATGCCTTTGCTGTGGGTTTCCAAGGTTCTCTGGTGAAGAGAGTACAGCAGAAAAACATTTTGGGAAACACAAGAGAGGTTTCAAAGCTCAGGCAGGGTGGTGGAGGCTGTCTGCCTTCTACCGTTTGCTCCTGTAGTTTTAGTGACACAGAGCCTTGCAGAGTCTGGGAGATGCCTGAGGGAACATTTTTCTTCCAAATCCTGGCTTTGAAACTCTAGTCAGATAAAGAATAAAGAATGGAAACCTAGGTTTAAGGAAAGATCTAATTCTGCACCTAAGCTCACTGCTGCTTCCTGAAAGCCTGTCAGGAGG…
LNC_000379	XLOC_038322	lincRNA	chr7:89518798-89532713	+	2	12986	138	TTTTTCCTGTCAAAGCTTGCCCTCAGAAAGGGAGGGCCTGACATCCTATTCCACACCAGGATGTTAGTGACATGTCCAGTGAGCTAGTGTTTGCCTTGCCTTTAAATAGGAAAGCCCTGAACACATTGTTGAGTAGTGTTTCTCAAACATAAAGGAAACTAGTATTGTCCACCACGTTAAAGGCAAAACCTTCTTAGACCTCCCCTGTCTTAGCTTACATTTTCTTTTTAAACAATCCATTAATGTGAGTGTATACATAAAGCTAGGTGAAAACTTAAACGTTTGAACAACTCAAGAATAAAACTCAAACTGATCGAATACAAAGATTCTCTTCCGGAACAGTAAAATTTAGGGTTTCTCTCAGTCAGTTCTCCACAGTGCTTCCACTCCTGTGGTCTG…
LNC_000380	XLOC_038701	lincRNA	chr7:123031324-123068295	+	3	2608	132	GTGGGCTCAAAAACAATTTAAATACAAAAACACACGCAGGTTCCCCTCCTTCCCTTTGCCTTTTGGTCTGGCTCTCTCTACCTTTGCGTTGGTGCCTGACCGAATGGAAAACCCTTCTTCGTTTTGCAGCCTGTGAGCTCCGGGTACCTGGAGACAAGGCCCCTGTGCTGCCCCCACCCCAGGAGCCGTCCCCCCAGCATTCTGCAGTCCTCTGACTATCAGCCTGGTGTGGACACTGAGGCCCAGAGAGGTGATGTGATTTGCCTAAAGTCATGCAACTAGTGGCAGAGCCCAGCCTAGAAGCCAGGTGTCCTGGATCTCAAGATACTCCACTGCCTGAGGAATGGAACAGGTTCCACACACTGGTGGTGATTCACTGCACTGTACATACAACACTGA…
LNC_000381	XLOC_038719	antisense_lncRNA	chr7:125878419-126082411	+	3	1024	94	CCCACCCACAGCACCACTGCTAACAGAGGTGTACAGACACAGTGGCTAAAGACATCGTAAGAGGCCAGCTCAACAATGAACACAGAGCACCTTCGTATGATTCTAGGCATCACCTTGGGCTGTGCCCAGGCCCTGGGGGACACAGCATCCCCTGGTGCTGAGCAAAAGGAGATAAGCAGTTGTGTCCCCCCACCATGCTACTTCCCACGCTCCTTACCTGAGAGCACCGTGAAGACCGCAGCAAAGGCATTGAGCTTCAGCCCGTCTATGACGCTGCTGGAGTGGACGAGCTCAAGACACATGAGACTGAAGCCGACCACCAGCAGAAGGATGTAGAGCACCTCAGAGACCACCGACAGCCACAGCACCCCTGGAGAGACAGGACTCTGAGCATGATGT…
LNC_000382	XLOC_038894	lincRNA	chr7:140187134-140191807	+	2	2348	105	GTTTTAAGAGCCAGGGGATTTCCCGTGGCTTTCCCTGGGGCTCCATTAAAAAGAAGGTTATTTGGGCCCCTGGATCTAGCCAGCCTACCTGCCTCTTCTCATGGAGAGGTTGGGGTCTATATGAATGGCAAGGGAAGAACTTTGCAAATGGCAAATGGAAACACTTGATGCTCTGAATCTCTCCTTGAGGCACATCTGTGGACTTCCTGTTGGCCAGGAACATGCTTTAGGGACAGAATCTGGTGGAAGAGGACTCAAAATTTAGAGACTGAAGAAAGCTGGTCTTGGGTCATGTGATGGATCATAGCTGGAGGCTGAAAAGAACACTGGGAGAGGAGGGTGAACTGTGACACCCCCAGTGCCACTTCAAGGACTGAAGAGCTGGAACCAATTGCCCAT…
LNC_000383	XLOC_039500	lincRNA	chr7:25483220-25489508	-	2	3795	185	CAACCTTGTTCCAGGCATTTAAGCCTGCCGCTGCCATGCAACACAATTCCAAGGTTTCTTCATCATATACGATCTGCATCCCTTCCTCAGCATATTGACCGTCTGCTGGTATTTAGAAATAGTAGTACCTCCGGCTCTATATTTCTGTGCTATCTCCTTAGCTGCTTTTCTCCACCATGAAAGCCACTGTAACTGTGGCTCAGGTTCTAATACCGATCTTCTTACAAAGTTCCAGTCTAGGGGGATTATTCTATTTTGATCATCAAAGAAGACAAGCTATGTTTTATGAATGCAATCCAGTCCACTAGAACAACACCAGCATGTATCAGCAGCAGCAGCAGTCCACTAGAACAACACCAGCATGTATCAGCAGCAGCAGCAGTCCACTAGAACAACACC…
LNC_000388	XLOC_040440	lincRNA	chr7:95544045-95596116	-	4	5487	146	CCCTCTTGGGATAAAATGCACTTTCCTTCCCTCCCCAGCTTGTTCCTAGCAGGATTTAGTGAGGACAACCATGTTCAGCATATTTAGAAGATCTTCATACCCTTACTATGAACCAGCCATCCAATGAAAAGGAGAGGGGAAAGTGAAATGTCTACCTCTGATGAAGGATGTCTCAGGAGATTTGAGTGAAGCTTGAAGCAACATGGAAAAGCCAGTATTGATCACTCAAATGAGAAGAGATGGGACAGGACAAAGGAGGGCTCACTGGCTGATGATGGAATGACCAGAGGCGTCAGGAGTGGCTTTAGACTAAGTGGAGCCAGAGGCGAAAGAACTTTGGAACTTCACAGCTGGGAGCCCTGGCTTTTCTTATCTCAAGCGGAGACCCATAGAGCATCT…
LNC_000391	XLOC_040723	lincRNA	chr7:110630162-110635422	-	2	5057	138	GTTCAGATAACCAATAAATAAGTAAATGTGGGCATATTAAAACCCACTAGGGATGGGTTGTGGGGACGGAAGCTCTATTGCATTTGGGCTCTGGATCTTTATTTGCAGTGCTGGGGACCGACCCCTGAACCTCAAACATGCCAGGCAAGGGTTTGGTCAGTGTTCGTCACATCTCCAGCTCTGAGCAAAAGCAGAAGAGAGGATTCATGCTGTGTTCGTAAGGGTCTCCAGGGAAACAGAGTTAGCACAGGATGATGGACGCAGGGATATTTGGTATAGGAATTGACTCGTATAATTATGGAAGCTGAGAAGTTCCAAGATCTGCTATCTGCAAGTGGAGGAACCTGGAAAGCCAAAGACCAGAAGATGGCTGCTGACTTTGCTGAGGGTGACTCTCCT…
LNC_000398	XLOC_041116	lincRNA	chr7:145211555-145228314	-	2	2578	137	CCATGCTCGCTGCCATGCTGATAATGGACTAAACCTCCGAACGGGTGTGGCCCTAGCCCAAGGCAAGGCTAGTGGGTGATTGACAGCCCCTCTGGAAGGATCTGGACTTTACTCTGAGCCTTGCATGTTCCCAGGAGAAGGTATGGAGTTGGCTGTACGTGACCCATCACAGCACCTTGTCTGTGAAAATCTGATGGTGAGTCTTCAGCATTCTAAGCCTTGGTTACCTCATCCATATGTTGGGGTTGATTTCCAGCATCTGGGACATTCCACCTTCAGAGTACTCTGTAGCTGTGGGGCCATGGAGGATGCCAGACTCAGTGTCTCCTCAGCACGGTTTTTGGAGGGGCAACAAGGCAATCAGGCCTTGACAATCCCTGTCATTTCCCATAGCCTGCC…
LNC_000399	XLOC_041157	lincRNA	chr8:4809223-4829438	+	2	3411	152	TCTGTTTCTCAGTGTCTCACTTAGGGCATCTTGAAACTTCCTACCCATGTAAGAAGACCTCAGAGAAGGCTAGAGTGGGAAGTGCACATCAGCACCACTGAAAGTGGTGAGCGTTGTATCTTAAGCAGGAAGAATAGCCATGCAGGAACATCCAGCTGTAGAGGCAGGCCAATCCTCTTGAAGAAACATCAAAGGTGTGTGCCAGAGGGTCAGACAGCAAGATTGGTGAGGTTTGAAGTAGGAGAGGCACTGGGGAAATAAATCATGGAAATTCTATATTGTGGGATAGGCTACCCAGATACATGTTCTGGAGAGATTGTGTAAGTGTAAATATCTCTGTTATTTCCTCTGATGAAGGGGTGAGATGAGCCCAGAGCATTTCCTTCTCTATTCTAACTA…
LNC_000400	XLOC_041208	lincRNA	chr8:8781717-8793611	+	2	2923	98	CAGCTGCCCAAGGAAGCCCTCATTGGATCCAGGCCTGAAGCACCACCAAGAAGCATTCTTCAGGAGAGGTTCTGCCTGGCCCTGGAACAGAAACAGTATATGGATATAAAGTTAATCTGCAGAACACCTTTTTAGAGAGAAAGAAAAATCATCTTGGACCCCATCTGAGACACTGGGCCTTCATGCAAATCTTCCCAGACACTCCACTGTGTTTCTGTCCCACTGCGGCTGCGCAGAATTTCCCATTTGAACGAACGTTGCCACCTATCATCACCTTACCCAAGTTTTCTGGACCTAACGAAATAATCACAAACAACAGTTTCTCAAACGCTTGAAGATAACGAGTGCCCTCCTTGAGTATTTCCAGTTTCATTTCCTAGTTCTTCAACCCCTTCCTCG…
LNC_000401	XLOC_041223	lincRNA	chr8:10690028-10692145	+	2	1508	125	ATATTTGGAAGGGAGAGGAGGCACTGTGCTTTGTCATGGCCGACTGACTCTGTGTGAGCGTGACTAAAGGTCTACGTGCCGAAGACAAACGACTGAACGTGTTATACCTGTCAAAGTAAGCAGCTCTTTGGATCGGAGTGTTGAACAGAAGTCCTGGAGTACACAGACCAACGTTCTATGAGGTCCTCCTACATGGAGGGTGTCATTCCCAAGCCTGGTACAGCCTTGCTTCTTTTCTGTCTCTCTGAACGGGGAGGGAAGACCATCAGCCACAGACAGCAGCGGCAGAAGCAGCCTGCCAGCAGATCTCATGGCCCTTACAAAGGTCACAGCAGCCTGGCATGTGACCTTTGATGTCCCCTCCACACCTAACTTAATGTCTACTGAGGACATGTAAAG…
LNC_000402	XLOC_041242	lincRNA	chr8:12749236-12752581	+	3	1746	130	CATGGTCAGTTGGGGAAATGGACCTGTGTGGTGACACTGCCAAGCTGCTTCTCAGTACAGAGTCCTGTGCGTGGTTAAGCAGCAGGATCCCGGCACTAATGAGAACGTGGAGTGCTGGACCTGGAGACAAGGCAGAGTCATCAGCATGGCCACACATTTATCTCTGGGACATTCTGCCTTCTCTGCTGGAATGGGCTCATTGAACACCAACTGCTCGTTCACCTCAGCTCCTGGCACCCACAGTCTACTCTGCTGCTACGACCTTGGGGCCGGAGACCTGAAATCAGATCCCCATGCTCATGTGGCCAGCACATCACCGACTGAGCTGCCCTCCTTCCTCCCCTTCTCTCATGGCCTTCAACTTGGTACGTGGCTGAAGAATGACCTTGAACTCCTCAA…
LNC_000428	XLOC_043062	lincRNA	chr8:116181432-116186073	-	2	1084	70	GCCTACCTTTTCCCTTCTTGACTAATGCTCTCAGAAAAGCATCTTAATTTTTTTCCTTCCCATTGCTACAATCTCTCAAAGATATACTTAATGGTTTATATATATAATGGGCTGGCAGAACCCTGTTTGCCCAGTCACTTAGTTAACAGTACTTAAACTGTAGGCACTGTATAACTGTTTTCCAACAGATAAATTAAGTGCGGTCTTGTGTAATGAATGAGGACAGAGCTGGACAGAGAGAAACAAGGAGAAAGAACATTTGAAAATGTTGGGGGACTTTCAAGTTCACAGTGGAAGAAAGATTGGAGCTTCATCCATGGGCGTGAAAGAGGGTGTTTCTGGTGGAAACAATTGCTAGAATGAATTCAGAGGAGATACTGGTCTCGTGCAGTGGAACTG…
LNC_000429	XLOC_043068	lincRNA	chr8:116225356-116271463	-	2	5186	155	GTCCCAGTGCTGTGACAAACTTTAGTCCCTCGGATCGCCTGCCAACCCACACCGGATTCACTCTGCATTCTCATCTTAAAGATTAAGTTACCGATGCAAGGAAGGCCTGCATTAGATTCCCAGCCATCAGTGTCCACTCCCATCGGTGCCACAGAGGCAGGTTGAAGCTTGAGCCACGGTCTCTGAGGACACAGAGGACATCATGCTTCGTCCACAGGTCAGAAGCTTGACAGGGACACGGCACCCTCATTGAGCAAAGGCTGGGTGGTGGTATACTTTCAACAGTGTTTACTTAGCTATGTAAGTCAGCTTCCTGCCCCTGGTTCCAAATCCATGAGGTCATTTACATATAAAGAGAAAGGTTTACTTCTGCTCACATTCTGCCTTACTTTGGCCTCA…
LNC_000447	XLOC_044713	lincRNA	chr9:44664308-44672545	-	2	7369	170	GACCCCTCCCCTCCTGGAAGAGAAAGTTCATAGAGCACACAGGCACCCCATTCCTCAGACCACAGCAGGGACTAACCACTGACCACCTGCAGATAAGGGAAGCCCAGAGTACAAAGACAGACCATTGGCTGCCCCCACAGACAAGGAAAGCCCTTGCCACCCCATTCCCTAAGGACCAATCAGTTTAAAAGTCACACTGTTCTACCAATCACGTTGTGCCTAGTGGCTGTTGCTCTATTCTACCTCTGAAAGCTGTATAAAAACTGGCCAAACGGGCTGCCCAAGGTTGCTGCCTTTCCTTCAGGTGCAGGAAGACCCCAGTGTACTGGAACAATAAATTCCTCTTGCTTTTGCATCGATCCCTAGCTCCAAGTTGTTCACTGTGGCAGGGGTAGGGGT…
LNC_000461	XLOC_047972	lincRNA	chrX:150486074-150514738	-	2	23796	172	AGCTCCTCCATTGGGAGCCCTATGATCCATCCATTAGCTGACTGTGAGCATCCACTTCTGTGTTTGCTAGGCCCCGGCATAGTCTCACAAGAGACAGCTACATCTGGGTCCTTTCAATAAAATCTTGCTAGTGTATGCAATGGTGTCAGAGTTTGGATGCTGATTATGGGGTGGATCCCTGGATATGGCAGTCTCTACATGGTCCATCCTTTCATCTCAGCTCCAAACTTTGGCTCTGTAACTCCTTCCATGGGTAGGAGACAGGTTTTCTTTCCAGGTGTGGTTTTAGGCCACACAGGACAAAAAGATATAGAGCCTTTTGTAGCAGTAATTTAGAGCAATAAGTAGAGGACCTGAGTGGTTCCTATGGCAACCGAGAATTAACAGGACAAAAAGATA…
